# Supplementary material for: Mining the Prognostic Role of DNA Methylation Heterogeneity in Lung Adenocarcinoma
Source: Hindawi journal article supplement (doi:10.1155/2022/9389372), 2022-05-28
Supplement: f7 [file 9389372.f7.pdf]

**Table S1**

| Univariate Cox regression |          |            |            |            |
|---------------------------|----------|------------|------------|------------|
|                           | p.value  | HR         | Low 95%CI  | High 95%CI |
| cg26697158                | 2.00E-07 | 0.00087066 | 6.11E-05   | 0.01240095 |
| cg03025013                | 3.00E-07 | 2521.5923  | 126.01745  | 50456.7246 |
| cg23389061                | 5.39E-07 | 37667.9174 | 611.543789 | 2320147.84 |
| cg24237439                | 5.75E-07 | 67.9228467 | 12.9953428 | 355.012805 |
| cg24436578                | 1.28E-06 | 328.472085 | 31.4849662 | 3426.83903 |
| cg20354848                | 1.31E-06 | 16940.577  | 327.894513 | 875230.109 |
| cg08785274                | 1.60E-06 | 52.8963191 | 10.4599376 | 267.498784 |
| cg14038647                | 2.49E-06 | 4.79E-05   | 7.63E-07   | 0.00300663 |
| cg03942855                | 2.61E-06 | 29.3302564 | 7.16691879 | 120.032607 |
| cg10959711                | 2.72E-06 | 172758.688 | 1120.19674 | 26643145.3 |
| cg07113947                | 2.79E-06 | 2.5903E+13 | 63528109   | 1.0562E+19 |
| cg20121803                | 2.79E-06 | 7.97E+21   | 5.496E+12  | 1.16E+31   |
| cg02336869                | 3.13E-06 | 1126.14751 | 58.7157095 | 21599.1296 |
| cg14565265                | 3.17E-06 | 10.0647825 | 3.81051651 | 26.5842821 |
| cg19224203                | 3.27E-06 | 17471558.8 | 15548.3149 | 1.9633E+10 |
| cg09306340                | 3.38E-06 | 99.9174582 | 14.3258266 | 696.888127 |
| cg21437481                | 3.57E-06 | 86.1388136 | 13.0889978 | 566.880316 |
| cg09655116                | 3.71E-06 | 235100.178 | 1247.20422 | 44316795   |
| cg25144930                | 4.08E-06 | 1560.82115 | 68.3606783 | 35636.9003 |
| cg13300301                | 4.71E-06 | 0.07383721 | 0.02419168 | 0.22536402 |
| cg08279757                | 5.47E-06 | 452321.427 | 1648.46508 | 124112228  |
| cg07871500                | 5.61E-06 | 5002.34912 | 126.581329 | 197687.108 |
| cg10463708                | 6.44E-06 | 25.0215951 | 6.17787667 | 101.342298 |
| cg04006913                | 6.98E-06 | 7278691548 | 364111.686 | 1.455E+14  |
| cg22434226                | 7.35E-06 | 31672.0622 | 341.272159 | 2939353.52 |
| cg17150246                | 7.48E-06 | 48.4359812 | 8.86851771 | 264.536234 |
| cg15696662                | 7.59E-06 | 12.1956257 | 4.07972401 | 36.4567029 |

| Multivariate Cox regression |            |            |            |            |
|-----------------------------|------------|------------|------------|------------|
|                             | p.value    | HR         | Low 95%CI  | High 95%CI |
| cg07219542                  | 7.08E-07   | 103.155098 | 16.5088788 | 644.560682 |
| cg02337836                  | 5.42E-06   | 148.052666 | 17.1811057 | 1275.79636 |
| cg24237439                  | 6.10E-06   | 118.317374 | 14.9524332 | 936.235643 |
| cg10463708                  | 7.19E-06   | 52.062116  | 9.26602794 | 292.516269 |
| cg02709432                  | 7.38E-06   | 38.448822  | 7.79584763 | 189.628118 |
| cg14565265                  | 8.61E-06   | 14.0577266 | 4.38807397 | 45.0356301 |
| cg24073738                  | 1.64E-05   | 1.1925E+16 | 581566476  | 2.45E+23   |
| cg06498232                  | 2.06E-05   | 171.311278 | 16.0608167 | 1827.27657 |
| cg02156680                  | 2.32E-05   | 43.7945623 | 7.60669604 | 252.141492 |
| cg02874942                  | 2.50E-05   | 84.0269719 | 10.7028099 | 659.689566 |
| cg04452959                  | 2.91E-05   | 53.3203522 | 8.26603691 | 343.944745 |
| cg04436714                  | 2.98E-05   | 36.0558989 | 6.70015273 | 194.029584 |
| cg03942855                  | 3.46E-05   | 25.8621444 | 5.54716859 | 120.575119 |
| cg10305451                  | 3.93E-05   | 16.3234086 | 4.31184297 | 61.7957724 |
| cg06998282                  | 4.53E-05   | 13.1375517 | 3.810909   | 45.2897891 |
| cg07696485                  | 5.13E-05   | 118.216366 | 11.7364863 | 1190.74047 |
| cg03070194                  | 5.26E-05   | 617.384777 | 27.4136285 | 13904.1778 |
| cg08440349                  | 6.42E-05   | 1.2921E+10 | 142241.814 | 1.1737E+15 |
| cg05305140                  | 7.73E-05   | 56.4678447 | 7.64089681 | 417.309324 |
| cg09992998                  | 7.86E-05   | 2.9297E+11 | 596014.796 | 1.4401E+17 |
| cg02288341                  | 8.89E-05   | 21.2734946 | 4.61079224 | 98.1526708 |
| cg24148025                  | 9.04E-05   | 1.2228E+11 | 344039.101 | 4.3463E+16 |
| cg17380238                  | 9.54E-05   | 71.2501564 | 8.35898237 | 607.320911 |
| cg23924887                  | 9.80E-05   | 8881.20335 | 91.6013792 | 861076.259 |
| cg14071579                  | 0.00010196 | 17.3375997 | 4.1121408  | 73.0987527 |
| cg09257526                  | 0.00010352 | 103.702374 | 9.95629097 | 1080.13943 |
| cg20121803                  | 0.00010654 | 2.44E+25   | 3.5273E+12 | 1.69E+38   |

|            |          |            |            |            |            |            |            |            |            |
|------------|----------|------------|------------|------------|------------|------------|------------|------------|------------|
| cg09578291 | 8.23E-06 | 178.799758 | 18.295696  | 1747.37018 | cg22965432 | 0.00011239 | 29.2308853 | 5.27177    | 162.079274 |
| cg23651323 | 8.76E-06 | 233.960494 | 21.1184139 | 2591.93294 | cg06033194 | 0.00011936 | 84381.9691 | 261.049354 | 27275749.2 |
| cg01803049 | 9.63E-06 | 0.00122641 | 6.30E-05   | 0.02388142 | cg12208770 | 0.00012031 | 793.638474 | 26.4087014 | 23850.5491 |
| cg04852280 | 9.89E-06 | 1252308.74 | 2475.08844 | 633624703  | cg20063141 | 0.00012214 | 77.7895731 | 8.43785362 | 717.151299 |
| cg17132124 | 1.00E-05 | 43.9233371 | 8.19895258 | 235.30561  | cg13300301 | 0.00012365 | 0.08354381 | 0.02352213 | 0.29672347 |
| cg25320115 | 1.01E-05 | 31.0879147 | 6.76284271 | 142.90713  | cg00069002 | 0.00014938 | 901.084248 | 26.7656321 | 30335.6491 |
| cg14647739 | 1.08E-05 | 92100.4529 | 566.853608 | 14964169.4 | cg00818480 | 0.00015018 | 491530859  | 15765.2216 | 1.5325E+13 |
| cg07219542 | 1.16E-05 | 33.410512  | 6.96169503 | 160.343466 | cg10616515 | 0.00015108 | 9756012778 | 66443.0258 | 1.4325E+15 |
| cg02541231 | 1.18E-05 | 9136.54827 | 154.536657 | 540172.9   | cg16601494 | 0.00015171 | 7.44442537 | 2.63489997 | 21.032855  |
| cg11248254 | 1.37E-05 | 1434.94455 | 54.2089138 | 37983.8984 | cg08599448 | 0.00015655 | 300.766949 | 15.6097774 | 5795.13437 |
| cg03188198 | 1.40E-05 | 4.1769E+11 | 2381455.66 | 7.3261E+16 | cg02336869 | 0.00015941 | 863.630665 | 25.8328742 | 28872.4329 |
| cg23755113 | 1.44E-05 | 3866730.36 | 4077.99739 | 3666408350 | cg17929951 | 0.00017417 | 30.08471   | 5.08699067 | 177.922437 |
| cg19604470 | 1.48E-05 | 31359.0235 | 289.559276 | 3396155.6  | cg03317642 | 0.00019072 | 294.811019 | 14.8678113 | 5845.75197 |
| cg04670377 | 1.57E-05 | 4813912.94 | 4461.34231 | 5194346498 | cg03180980 | 0.00019652 | 1082.37781 | 27.3608277 | 42818.212  |
| cg06218124 | 1.58E-05 | 832861.993 | 1707.54051 | 406232880  | cg20384132 | 0.0002026  | 80.665001  | 7.96084801 | 817.355434 |
| cg11641045 | 1.71E-05 | 153.160517 | 15.4507665 | 1518.25115 | cg02318139 | 0.00020836 | 29.8276812 | 4.95802608 | 179.444511 |
| cg10801634 | 1.81E-05 | 1.7141E+12 | 4370314.1  | 6.7232E+17 | cg02501882 | 0.00021126 | 4023.02871 | 49.8665784 | 324561.27  |
| cg13666340 | 1.87E-05 | 6373.29239 | 115.37138  | 352070.469 | cg16306898 | 0.00021144 | 9.88173369 | 2.94138794 | 33.1981578 |
| cg15240082 | 1.95E-05 | 1834.34566 | 58.2978902 | 57717.7663 | cg18811550 | 0.00021328 | 304.988599 | 14.7666657 | 6299.19085 |
| cg23574449 | 1.99E-05 | 70895.7854 | 418.683077 | 12004813.8 | cg08254307 | 0.00021502 | 631.805145 | 20.7649714 | 19223.6114 |
| cg27131958 | 2.04E-05 | 2457.06813 | 67.6894634 | 89189.4172 | cg08785274 | 0.00021989 | 48.4007751 | 6.18222081 | 378.930986 |
| cg10293354 | 2.05E-05 | 173453.409 | 673.415033 | 44676883.5 | cg26410550 | 0.00022162 | 0.027789   | 0.00414953 | 0.18610008 |
| cg06208248 | 2.11E-05 | 12787274.1 | 6784.08321 | 2.4103E+10 | cg23098599 | 0.00022194 | 9.2408E+11 | 411707.413 | 2.0741E+18 |
| cg07099627 | 2.20E-05 | 446320.957 | 1097.56957 | 181494096  | cg00536924 | 0.00022366 | 39.5174634 | 5.60790892 | 278.469201 |
| cg06993761 | 2.21E-05 | 6866514.04 | 4771.52539 | 9881329589 | cg15696662 | 0.00022566 | 9.87807331 | 2.9249553  | 33.3599396 |
| cg20384132 | 2.26E-05 | 53.8148821 | 8.51786477 | 339.996186 | cg00350296 | 0.0002333  | 59.4180473 | 6.74703079 | 523.267857 |
| cg00246980 | 2.27E-05 | 33034.6878 | 267.980585 | 4072274.86 | cg13939204 | 0.00023332 | 21.9844823 | 4.23923805 | 114.010456 |
| cg12614442 | 2.31E-05 | 93184841   | 19022.2491 | 4.5649E+11 | cg26709300 | 0.00023554 | 86.7292439 | 8.03887267 | 935.698581 |
| cg04021962 | 2.42E-05 | 21866497   | 8554.70353 | 5.5892E+10 | cg09937039 | 0.00023839 | 33.6949614 | 5.16118454 | 219.978652 |
| cg15152115 | 2.52E-05 | 595.051155 | 30.4676418 | 11621.7028 | cg01111358 | 0.00023955 | 28.0334512 | 4.73385677 | 166.011442 |

|            |          |            |            |            |            |            |            |            |            |
|------------|----------|------------|------------|------------|------------|------------|------------|------------|------------|
| cg24692861 | 2.57E-05 | 34452.3003 | 265.653426 | 4468080.9  | cg23511432 | 0.00024325 | 13.9567163 | 3.41419728 | 57.0529212 |
| cg17114257 | 2.58E-05 | 528.258707 | 28.4757894 | 9799.80775 | cg24353213 | 0.00024382 | 18.2233827 | 3.86496647 | 85.9235595 |
| cg06892635 | 2.65E-05 | 1.5769E+12 | 3217329.04 | 7.7291E+17 | cg26872028 | 0.00024662 | 18.1471312 | 3.8526664  | 85.4780396 |
| cg11827182 | 2.75E-05 | 139.62962  | 13.8813643 | 1404.50394 | cg06834005 | 0.00024972 | 30.7566605 | 4.91686615 | 192.393313 |
| cg08446657 | 2.81E-05 | 264541.345 | 767.131686 | 91225697.4 | cg00674365 | 0.00027269 | 8.51968085 | 2.68799338 | 27.0034005 |
| cg21116657 | 2.87E-05 | 2023649.54 | 2247.68817 | 1821941985 | cg09802835 | 0.00027367 | 17.7690128 | 3.77225216 | 83.7000825 |
| cg04436714 | 2.88E-05 | 18.858582  | 4.76270686 | 74.673106  | cg05436939 | 0.00027473 | 493.8063   | 17.4752583 | 13953.7086 |
| cg08511084 | 2.88E-05 | 186908.356 | 632.940537 | 55194337.6 | cg02126424 | 0.00029402 | 3173659126 | 22797.6844 | 4.418E+14  |
| cg20240860 | 2.90E-05 | 2863.13637 | 68.6151833 | 119471.369 | cg20631104 | 0.00029619 | 56.0968838 | 6.33363398 | 496.849105 |
| cg00170536 | 2.95E-05 | 113755.647 | 482.745805 | 26805716.6 | cg09655116 | 0.00029698 | 218106.051 | 279.584343 | 170146328  |
| cg12208770 | 3.02E-05 | 595.560644 | 29.5983498 | 11983.5222 | cg18442524 | 0.00030853 | 18.2901702 | 3.77183207 | 88.6917336 |
| cg02288341 | 3.02E-05 | 15.4685467 | 4.27195184 | 56.0109167 | cg07004443 | 0.00030864 | 733.288732 | 20.3588932 | 26411.6697 |
| cg27265272 | 3.15E-05 | 37353.3773 | 262.57548  | 5313804.6  | cg00089453 | 0.0003145  | 307.441217 | 13.6297458 | 6934.83966 |
| cg16598405 | 3.17E-05 | 12819.9588 | 148.955293 | 1103360.21 | cg06055845 | 0.000316   | 125.514315 | 9.0504111  | 1740.67709 |
| cg10571951 | 3.17E-05 | 174.989136 | 15.3621544 | 1993.28797 | cg04734210 | 0.0003168  | 7275925109 | 31222.0426 | 1.6956E+15 |
| cg26375182 | 3.21E-05 | 12330084.8 | 5603.21287 | 2.7133E+10 | cg03033176 | 0.00032129 | 13517.0594 | 75.9147074 | 2406791.78 |
| cg22112476 | 3.23E-05 | 98913.2577 | 436.288954 | 22425120.9 | cg26296364 | 0.00032454 | 39.4095167 | 5.31696291 | 292.104728 |
| cg26145223 | 3.24E-05 | 3813.51215 | 78.0497812 | 186328.196 | cg09913183 | 0.00033618 | 1299100183 | 13554.155  | 1.2451E+14 |
| cg21870145 | 3.38E-05 | 33.401438  | 6.36095622 | 175.39125  | cg03576419 | 0.00034277 | 26.1811117 | 4.38338416 | 156.374752 |
| cg17252669 | 3.54E-05 | 228264541  | 24938.9647 | 2.0893E+12 | cg22517356 | 0.0003464  | 67.4495645 | 6.7152568  | 677.478746 |
| cg13527630 | 3.62E-05 | 553926.917 | 1042.46183 | 294336944  | cg14021375 | 0.00034701 | 14.0706818 | 3.30510657 | 59.9024818 |
| cg04511534 | 3.73E-05 | 67.4273291 | 9.111069   | 499.002336 | cg19670286 | 0.00034706 | 17.1828129 | 3.61754261 | 81.6159177 |
| cg08548478 | 3.73E-05 | 24210.9939 | 199.607684 | 2936621.55 | cg10784298 | 0.00035927 | 7019266.9  | 1218.57185 | 4.0433E+10 |
| cg24495844 | 3.88E-05 | 2273147.17 | 2130.76326 | 2425045597 | cg05888175 | 0.00036014 | 1432.02836 | 26.4352765 | 77574.5711 |
| cg16635274 | 3.91E-05 | 1400.51145 | 44.3401921 | 44235.9908 | cg02154252 | 0.00036175 | 121.043472 | 8.67505669 | 1688.92522 |
| cg07644571 | 4.00E-05 | 13892174.3 | 5425.04842 | 3.5574E+10 | cg27002699 | 0.00036663 | 542.37028  | 16.9900712 | 17313.9663 |
| cg02337836 | 4.05E-05 | 49.5013782 | 7.68221983 | 318.96854  | cg06834274 | 0.00036975 | 717.545751 | 19.2265467 | 26779.2189 |
| cg16441026 | 4.09E-05 | 1.267E+16  | 256473343  | 6.26E+23   | cg02242344 | 0.00037417 | 98.4288877 | 7.85389141 | 1233.55996 |
| cg12931029 | 4.13E-05 | 485.971402 | 25.2570015 | 9350.60341 | cg21940568 | 0.0003798  | 93.5627772 | 7.65589066 | 1143.43238 |
| cg24888944 | 4.36E-05 | 492629531  | 33471.3637 | 7.2505E+12 | cg17150246 | 0.00038041 | 54.7711056 | 6.01988788 | 498.327223 |

|            |          |            |            |            |            |            |            |            |            |
|------------|----------|------------|------------|------------|------------|------------|------------|------------|------------|
| cg11356794 | 4.40E-05 | 529.235774 | 26.1241947 | 10721.4981 | cg25300386 | 0.00038301 | 40.1223247 | 5.23036653 | 307.779758 |
| cg26198823 | 4.41E-05 | 0.00060428 | 1.73E-05   | 0.0211612  | cg11382133 | 0.00038419 | 36.8672433 | 5.03348354 | 270.030411 |
| cg05446724 | 4.43E-05 | 4583670152 | 105823.954 | 1.9854E+14 | cg18132916 | 0.00038434 | 13.8201548 | 3.24295566 | 58.8958647 |
| cg21289924 | 4.50E-05 | 37697.344  | 238.812169 | 5950658.84 | cg14543527 | 0.00038539 | 7.7547E+11 | 211399.944 | 2.8446E+18 |
| cg10282345 | 4.65E-05 | 3.0306E+17 | 1171280922 | 7.84E+25   | cg10571951 | 0.00038719 | 308.090954 | 13.0063653 | 7297.96787 |
| cg23794671 | 4.75E-05 | 715.005161 | 30.1271281 | 16969.1708 | cg22144668 | 0.00038816 | 369365309  | 6834.07154 | 1.9963E+13 |
| cg08774802 | 4.89E-05 | 13121.8045 | 135.060042 | 1274853.4  | cg21295088 | 0.0003895  | 72.6952812 | 6.80649028 | 776.406591 |
| cg04151290 | 4.95E-05 | 75480.1239 | 332.666234 | 17126021.6 | cg18140857 | 0.0003938  | 77.8788497 | 7.0057611  | 865.732521 |
| cg01511567 | 4.97E-05 | 96.0080074 | 10.5835574 | 870.929987 | cg05987251 | 0.00039803 | 22.2943007 | 3.99984169 | 124.263879 |
| cg05966809 | 5.26E-05 | 897105.602 | 1168.07019 | 688998371  | cg01518065 | 0.000399   | 2.5784E+12 | 347611.691 | 1.9125E+19 |
| cg27162464 | 5.27E-05 | 430.551215 | 22.7629103 | 8143.70157 | cg22505746 | 0.00039994 | 146231595  | 4410.89102 | 4.8479E+12 |
| cg24005914 | 5.30E-05 | 64606.3511 | 300.361816 | 13896508.7 | cg01056889 | 0.00040329 | 16.0994917 | 3.45345013 | 75.0535326 |
| cg25230157 | 5.38E-05 | 32665.5843 | 210.558616 | 5067664.38 | cg21751146 | 0.00040376 | 1489254493 | 12325.8488 | 1.7994E+14 |
| cg22965432 | 5.38E-05 | 24.594798  | 5.1978616  | 116.375567 | cg25120284 | 0.00040484 | 106.038166 | 7.99945809 | 1405.60681 |
| cg07375912 | 5.39E-05 | 20840537.4 | 5843.18366 | 7.4331E+10 | cg00173504 | 0.00041345 | 44.2991867 | 5.40274539 | 363.226064 |
| cg05013422 | 5.46E-05 | 322533.474 | 680.438312 | 152883575  | cg00476675 | 0.00041792 | 0.0303753  | 0.00436126 | 0.21155768 |
| cg00150500 | 5.53E-05 | 27429984.2 | 6645.14645 | 1.1323E+11 | cg23651323 | 0.00042633 | 242.558147 | 11.4326179 | 5146.19267 |
| cg18611777 | 5.55E-05 | 150.141117 | 13.1312755 | 1716.69196 | cg15571373 | 0.0004361  | 0.0507595  | 0.00964202 | 0.26721862 |
| cg20879085 | 5.55E-05 | 11410108   | 4226.72105 | 3.0802E+10 | cg04511534 | 0.00043711 | 80.9479188 | 6.99319193 | 936.992094 |
| cg04900486 | 5.65E-05 | 4082274.18 | 2472.68959 | 6739609621 | cg02223962 | 0.00044356 | 103953228  | 3497.33961 | 3.0899E+12 |
| cg22077262 | 5.66E-05 | 56906.3301 | 275.727138 | 11744692.3 | cg07311956 | 0.00045026 | 23.90742   | 4.05964884 | 140.791668 |
| cg24372325 | 5.67E-05 | 1.2862E+10 | 154207.442 | 1.0728E+15 | cg19724344 | 0.00045337 | 11809.1431 | 62.560407  | 2229139.27 |
| cg13494509 | 5.79E-05 | 56559.0963 | 272.894756 | 11722216.4 | cg03707974 | 0.00045357 | 80.981424  | 6.94664138 | 944.052049 |
| cg19824710 | 5.85E-05 | 51.689958  | 7.54716144 | 354.02075  | cg19785066 | 0.00046052 | 11.1651801 | 2.8941982  | 43.072809  |
| cg02602480 | 5.89E-05 | 59302960.8 | 9564.53121 | 3.677E+11  | cg19839655 | 0.00046892 | 16.5261178 | 3.43241914 | 79.5685365 |
| cg10283505 | 5.94E-05 | 0.07119077 | 0.01959864 | 0.2585958  | cg08724901 | 0.00047086 | 5702816.37 | 931.736264 | 3.4905E+10 |
| cg11145055 | 6.18E-05 | 22057.0621 | 165.354982 | 2942239.67 | cg11525280 | 0.00047346 | 13.4218424 | 3.12901136 | 57.5727705 |
| cg11797365 | 6.24E-05 | 595.721043 | 26.0935241 | 13600.4458 | cg19584674 | 0.00047963 | 1255.91758 | 22.8844827 | 68925.699  |
| cg03553689 | 6.27E-05 | 1.4405E+14 | 16785270.6 | 1.24E+21   | cg18301703 | 0.00048247 | 259.430391 | 11.4403398 | 5883.05323 |
| cg08229199 | 6.45E-05 | 196.835145 | 14.7508029 | 2626.57394 | cg11841529 | 0.00048354 | 15.0182924 | 3.2793097  | 68.7794466 |

|            |          |            |            |            |            |            |            |            |            |
|------------|----------|------------|------------|------------|------------|------------|------------|------------|------------|
| cg16568036 | 6.64E-05 | 224.675745 | 15.7061235 | 3213.98151 | cg05952925 | 0.00048714 | 16.5054814 | 3.41483753 | 79.7785884 |
| cg04846715 | 6.69E-05 | 2999.10346 | 58.5767957 | 153552.639 | cg10959711 | 0.00048813 | 261938.81  | 236.002466 | 290725521  |
| cg17536086 | 6.89E-05 | 10168.1795 | 108.111512 | 956344.724 | cg14720706 | 0.00049046 | 33.1714186 | 4.63138528 | 237.583993 |
| cg12605679 | 6.90E-05 | 6498.59887 | 86.1134499 | 490420.339 | cg05369939 | 0.00049432 | 2725163224 | 13400.6327 | 5.5419E+14 |
| cg02242344 | 6.92E-05 | 39.7433263 | 6.47855166 | 243.80943  | cg04524239 | 0.00050238 | 0.02150277 | 0.00247288 | 0.18697621 |
| cg10671802 | 7.09E-05 | 44509918.6 | 7508.69955 | 2.6385E+11 | cg12249359 | 0.00050448 | 262632967  | 4734.56294 | 1.4569E+13 |
| cg00818480 | 7.10E-05 | 30673183.4 | 6211.36494 | 1.5147E+11 | cg08864344 | 0.00051332 | 22.9814102 | 3.9196695  | 134.742283 |
| cg01850934 | 7.19E-05 | 184846.059 | 463.988885 | 73639836.3 | cg15579745 | 0.00052181 | 7312.32259 | 47.9821205 | 1114374.71 |
| cg26785250 | 7.22E-05 | 2165180197 | 53137.2678 | 8.8224E+13 | cg22510727 | 0.00052318 | 119.577492 | 8.010407   | 1785.02497 |
| cg14808521 | 7.31E-05 | 2599144085 | 57795.5232 | 1.1689E+14 | cg23321951 | 0.00052984 | 234298357  | 4322.2514  | 1.2701E+13 |
| cg07994696 | 7.55E-05 | 84.3154146 | 9.38231016 | 757.712014 | cg09053081 | 0.00053617 | 11.9507602 | 2.93388709 | 48.6796746 |
| cg25300386 | 7.69E-05 | 36.2785754 | 6.11710846 | 215.156399 | cg06849504 | 0.00054351 | 87.2227508 | 6.93117532 | 1097.62167 |
| cg22249338 | 7.76E-05 | 63775.8275 | 263.974307 | 15408151.7 | cg17102205 | 0.00054964 | 12.7102515 | 3.00499901 | 53.7605814 |
| cg08716348 | 7.79E-05 | 83832.6446 | 302.580842 | 23226560.7 | cg02369725 | 0.00055061 | 96.2099215 | 7.21308511 | 1283.27184 |
| cg07469063 | 7.81E-05 | 1024.05523 | 32.8652513 | 31908.7507 | cg16411949 | 0.00055102 | 2.4297E+11 | 84343.8862 | 6.9995E+17 |
| cg02851517 | 7.83E-05 | 3525409.6  | 1986.75219 | 6255693536 | cg11097541 | 0.00056635 | 127.806693 | 8.10682373 | 2014.91377 |
| cg09552761 | 7.87E-05 | 144865.311 | 397.146565 | 52841847.6 | cg07392724 | 0.00056842 | 2262903790 | 10825.4644 | 4.7303E+14 |
| cg19605920 | 7.92E-05 | 20020.0427 | 146.330379 | 2739021.88 | cg03714619 | 0.00057336 | 11.9930463 | 2.91676045 | 49.3126406 |
| cg24353213 | 8.02E-05 | 13.5921086 | 3.71602129 | 49.7159199 | cg25975979 | 0.00057381 | 259.143836 | 10.9619491 | 6126.23968 |
| cg20184247 | 8.14E-05 | 44.6223672 | 6.74601545 | 295.160257 | cg14548272 | 0.00057534 | 54.2981443 | 5.58773094 | 527.636085 |
| cg07234508 | 8.16E-05 | 269.699146 | 16.6543354 | 4367.48916 | cg03578689 | 0.00058042 | 71.0911529 | 6.26492292 | 806.706177 |
| cg02019072 | 8.17E-05 | 1251.58943 | 36.0096807 | 43501.5273 | cg10763374 | 0.00058381 | 0.02646481 | 0.00333979 | 0.20970978 |
| cg02029665 | 8.27E-05 | 69.8184081 | 8.42995765 | 578.248469 | cg15742848 | 0.00058776 | 13.3998793 | 3.05073349 | 58.8569162 |
| cg26410550 | 8.30E-05 | 0.03671141 | 0.00708056 | 0.19034195 | cg17861791 | 0.0005898  | 52568.4632 | 106.692028 | 25901122.9 |
| cg19104830 | 8.57E-05 | 2410566.56 | 1575.46795 | 3688320769 | cg17668148 | 0.00059142 | 293138.129 | 222.897448 | 385513443  |
| cg23227945 | 8.61E-05 | 7320904.62 | 2742.69496 | 1.9541E+10 | cg23061046 | 0.00059328 | 27.215078  | 4.13093434 | 179.296113 |
| cg17147466 | 8.63E-05 | 812.058607 | 28.6477239 | 23018.9031 | cg13656831 | 0.00059919 | 45.8724003 | 5.16010439 | 407.797392 |
| cg26709300 | 8.82E-05 | 43.0547639 | 6.56479194 | 282.371888 | cg11314748 | 0.00060022 | 0.02700689 | 0.00343231 | 0.21250179 |
| cg26461589 | 8.84E-05 | 119205.456 | 345.503657 | 41128192   | cg03434509 | 0.00060201 | 20.9165247 | 3.68208582 | 118.818796 |
| cg21527360 | 8.85E-05 | 23186.0687 | 152.335323 | 3529015.91 | cg01392273 | 0.00060281 | 3424545116 | 12215.3873 | 9.6006E+14 |

|            |            |            |            |            |            |            |            |            |            |
|------------|------------|------------|------------|------------|------------|------------|------------|------------|------------|
| cg06762403 | 8.85E-05   | 707.794836 | 26.6097016 | 18826.7249 | cg10832166 | 0.00060385 | 0.03151367 | 0.00437002 | 0.22725539 |
| cg17432022 | 8.97E-05   | 479722.656 | 689.027202 | 333998173  | cg01411912 | 0.00061564 | 54.1269011 | 5.51259188 | 531.459881 |
| cg22657536 | 8.98E-05   | 89.454012  | 9.44013022 | 847.659945 | cg14280533 | 0.00061926 | 16.31038   | 3.29784716 | 80.6673208 |
| cg05588972 | 9.06E-05   | 539.840163 | 23.1332847 | 12597.7528 | cg04566159 | 0.00062136 | 50.6587563 | 5.3498262  | 479.699619 |
| cg15680989 | 9.23E-05   | 15905.5044 | 124.596134 | 2030440.77 | cg12033622 | 0.00062845 | 76.8555085 | 6.37836046 | 926.063871 |
| cg08491668 | 9.38E-05   | 16698.4922 | 127.035225 | 2194978.92 | cg24398450 | 0.00062955 | 24.8791147 | 3.9405657  | 157.076521 |
| cg21253692 | 9.54E-05   | 99165064.1 | 9545.57694 | 1.0302E+12 | cg22995449 | 0.00062998 | 73.9302373 | 6.27060116 | 871.635723 |
| cg22115596 | 9.58E-05   | 207545.328 | 442.163421 | 97418875   | cg12615761 | 0.00063683 | 8.18636981 | 2.44966894 | 27.3574316 |
| cg19247841 | 9.70E-05   | 30.2494504 | 5.44763899 | 167.968042 | cg16097357 | 0.00063767 | 9.91169379 | 2.65730592 | 36.9704042 |
| cg12114985 | 9.79E-05   | 78.8688336 | 8.76139817 | 709.965783 | cg27458485 | 0.00063807 | 40.5230787 | 4.84136437 | 339.185358 |
| cg17013432 | 9.88E-05   | 3323659.81 | 1732.28136 | 6376974747 | cg07245678 | 0.00063871 | 448.698148 | 13.482018  | 14933.2264 |
| cg20747741 | 9.91E-05   | 146.490003 | 11.8942963 | 1804.16904 | cg07722358 | 0.00064019 | 22.9132622 | 3.79545478 | 138.327978 |
| cg05021846 | 0.00010024 | 23.6802634 | 4.80737327 | 116.644755 | cg04573510 | 0.00064321 | 2.8791E+11 | 75517.3739 | 1.0977E+18 |
| cg03278488 | 0.00010086 | 200.076907 | 13.8453042 | 2891.28848 | cg20725013 | 0.00064359 | 21.9265769 | 3.72217558 | 129.164991 |
| cg17102205 | 0.00010115 | 11.7455234 | 3.3924796  | 40.6656301 | cg15215033 | 0.00064432 | 530.787192 | 14.4459396 | 19502.715  |
| cg09758595 | 0.00010289 | 2601948.73 | 1505.60199 | 4496631427 | cg06324635 | 0.00064541 | 20627.7906 | 68.5376947 | 6208346.33 |
| cg04450332 | 0.00010328 | 32.0700396 | 5.5698077  | 184.65403  | cg12940439 | 0.00064701 | 13.8150551 | 3.05579463 | 62.4569945 |
| cg21751146 | 0.00010342 | 144858355  | 10991.6845 | 1.9091E+12 | cg02461363 | 0.00064858 | 39.8857465 | 4.79551166 | 331.74203  |
| cg02318139 | 0.0001036  | 23.9992891 | 4.82345991 | 119.40928  | cg20018469 | 0.00065967 | 6936655.81 | 802.11293  | 5.9988E+10 |
| cg06295308 | 0.00010473 | 2.6109E+12 | 1391487.71 | 4.8989E+18 | cg05467676 | 0.00066017 | 34.2552519 | 4.48202991 | 261.805992 |
| cg11275803 | 0.00010485 | 165921.727 | 382.359046 | 72000440.3 | cg12727795 | 0.00066131 | 41.8030238 | 4.87591426 | 358.392848 |
| cg23719130 | 0.00010841 | 58852.639  | 226.316723 | 15304362.3 | cg23560546 | 0.00066503 | 36.431877  | 4.59518481 | 288.841845 |
| cg02884176 | 0.00010889 | 26.5098568 | 5.04081609 | 139.416415 | cg23195373 | 0.00066927 | 289.983824 | 11.0584291 | 7604.21012 |
| cg27105630 | 0.00011081 | 1734130.75 | 1190.45857 | 2526093321 | cg15979473 | 0.00067038 | 187.483713 | 9.1883077  | 3825.52955 |
| cg25994146 | 0.00011094 | 261.523523 | 15.5482383 | 4398.86189 | cg20864214 | 0.00067078 | 35.3005781 | 4.52768008 | 275.225015 |
| cg26329618 | 0.00011109 | 45.4434992 | 6.5608425  | 314.763176 | cg09310612 | 0.00067867 | 1471632594 | 7584.04371 | 2.8556E+14 |
| cg05305140 | 0.00011131 | 27.4988941 | 5.12080686 | 147.669927 | cg12931029 | 0.00067872 | 329.945525 | 11.6364714 | 9355.41764 |
| cg13939204 | 0.00011203 | 15.4243613 | 3.84892141 | 61.8123618 | cg23794671 | 0.00067873 | 694.620144 | 15.9456997 | 30258.7628 |
| cg14780540 | 0.00011237 | 39865.985  | 184.465125 | 8615703.19 | cg25800170 | 0.0006817  | 76.2182272 | 6.25339474 | 928.970328 |
| cg07226281 | 0.00011267 | 60415.9363 | 226.171008 | 16138608.5 | cg16058797 | 0.00068494 | 23.2688837 | 3.783108   | 143.120669 |

|            |            |            |            |            |            |            |            |            |            |
|------------|------------|------------|------------|------------|------------|------------|------------|------------|------------|
| cg18328334 | 0.00011279 | 44.8772378 | 6.50833046 | 309.444409 | cg15832300 | 0.00069075 | 151.721929 | 8.34163165 | 2759.59726 |
| cg21305265 | 0.00011387 | 106.782993 | 9.9593195  | 1144.91834 | cg07833852 | 0.00069231 | 0.03335412 | 0.0046768  | 0.23787571 |
| cg19703969 | 0.00011434 | 1360.04553 | 34.8024422 | 53149.2543 | cg26861703 | 0.00069719 | 19.8919907 | 3.53170599 | 112.039704 |
| cg07907506 | 0.0001153  | 24.4932808 | 4.81938836 | 124.480694 | cg04316429 | 0.00069874 | 256.965123 | 10.3898557 | 6355.34085 |
| cg14986845 | 0.00011537 | 103233826  | 8714.2323  | 1.223E+12  | cg13747794 | 0.00070212 | 1665.79047 | 22.820176  | 121596.691 |
| cg08650580 | 0.00011627 | 16717.3559 | 118.954723 | 2349381.2  | cg06526620 | 0.00070573 | 0.04855853 | 0.00843569 | 0.27951833 |
| cg17328794 | 0.00011787 | 1186198.5  | 960.134507 | 1465489331 | cg26186134 | 0.00071276 | 106114744  | 2389.01774 | 4.7134E+12 |
| cg26329020 | 0.00011844 | 12191.0058 | 101.287267 | 1467317.93 | cg26094150 | 0.0007128  | 468.566548 | 13.3099472 | 16495.5282 |
| cg25492645 | 0.00011919 | 254690.955 | 449.083537 | 144444134  | cg21437481 | 0.00071395 | 76.310195  | 6.19827969 | 939.493884 |
| cg18617679 | 0.00012044 | 525.178723 | 21.5639509 | 12790.4526 | cg06611606 | 0.00071614 | 4649748356 | 11670.0579 | 1.8526E+15 |
| cg01431908 | 0.00012065 | 18.1998332 | 4.14689983 | 79.8750736 | cg23840481 | 0.00071871 | 16801883.5 | 1092.64574 | 2.5837E+11 |
| cg26283550 | 0.00012111 | 2187920.57 | 1280.24818 | 3739115986 | cg16748413 | 0.00071884 | 29.2234427 | 4.13401392 | 206.581211 |
| cg21568286 | 0.00012308 | 1913565433 | 35011.58   | 1.0459E+14 | cg25087049 | 0.00071917 | 3333.65137 | 30.2962748 | 366818.413 |
| cg24457521 | 0.00012461 | 2775.50061 | 48.3505535 | 159324     | cg05392364 | 0.00072126 | 41.5311115 | 4.78966105 | 360.115926 |
| cg06161720 | 0.00012602 | 36509.7615 | 169.881679 | 7846418.11 | cg24850474 | 0.00072394 | 539.144698 | 14.055059  | 20681.3081 |
| cg19670286 | 0.00012672 | 12.7683091 | 3.47125125 | 46.9656923 | cg19824710 | 0.00072562 | 42.1242577 | 4.81318913 | 368.664733 |
| cg09728506 | 0.00012816 | 203.848724 | 13.4131726 | 3098.02189 | cg03188198 | 0.00072904 | 6.622E+11  | 91860.3863 | 4.7736E+18 |
| cg02369725 | 0.00012824 | 74.3380701 | 8.19579982 | 674.265939 | cg02884176 | 0.00073036 | 31.9361752 | 4.28012423 | 238.291982 |
| cg09974990 | 0.00012945 | 147322661  | 9672.08582 | 2.244E+12  | cg01026744 | 0.00073104 | 111.298357 | 7.22718577 | 1713.99001 |
| cg18442524 | 0.00012971 | 13.6124891 | 3.57438707 | 51.8410167 | cg05673638 | 0.00073139 | 4260874046 | 11004.0844 | 1.6498E+15 |
| cg15132559 | 0.00013091 | 34455.5252 | 162.993741 | 7283612.27 | cg19568591 | 0.00073264 | 18.2939089 | 3.38606247 | 98.8366592 |
| cg15270687 | 0.00013184 | 9495.97675 | 86.7649933 | 1039285.21 | cg08918020 | 0.00073302 | 240.00732  | 9.9711069  | 5777.04304 |
| cg18224445 | 0.00013361 | 357206.723 | 505.376003 | 252478634  | cg25347419 | 0.00074051 | 9.15666363 | 2.52977958 | 33.1430017 |
| cg10599693 | 0.00013387 | 1094189.07 | 870.834825 | 1374829854 | cg25320115 | 0.0007429  | 27.0816995 | 3.98329736 | 184.123449 |
| cg22907891 | 0.00013414 | 0.00011907 | 1.15E-06   | 0.01229985 | cg23687909 | 0.00074544 | 52.469367  | 5.25174786 | 524.212996 |
| cg06961086 | 0.00013757 | 0.00179664 | 6.97E-05   | 0.0463353  | cg12027420 | 0.00074552 | 55.2619337 | 5.36694856 | 569.016319 |
| cg16593556 | 0.00013806 | 4266.31669 | 58.0035729 | 313798.913 | cg23389061 | 0.00074662 | 9839.33669 | 46.9864937 | 2060433.52 |
| cg23431851 | 0.0001387  | 9.62323137 | 3.00288514 | 30.8392022 | cg13440692 | 0.00075339 | 80.052963  | 6.25436356 | 1024.64093 |
| cg21194918 | 0.0001393  | 1.2521E+10 | 79861.7447 | 1.9631E+15 | cg07164388 | 0.00075683 | 3230.20628 | 29.319204  | 355883.899 |
| cg04524239 | 0.00014054 | 0.02982024 | 0.00488862 | 0.18190128 | cg09317036 | 0.00076539 | 3606.99765 | 30.5685448 | 425615.028 |

|            |            |            |            |            |            |            |            |            |            |
|------------|------------|------------|------------|------------|------------|------------|------------|------------|------------|
| cg16489547 | 0.00014233 | 148.64678  | 11.2980334 | 1955.72665 | cg04122324 | 0.00077669 | 1336352.06 | 357.737055 | 4992037593 |
| cg03003256 | 0.00014271 | 101.070689 | 9.36724932 | 1090.53189 | cg21225170 | 0.00077934 | 19.4465724 | 3.44380349 | 109.811486 |
| cg18301703 | 0.00014481 | 152.601473 | 11.4094757 | 2041.04116 | cg18817318 | 0.00078388 | 939.274882 | 17.2934856 | 51015.5862 |
| cg07469555 | 0.00014517 | 152.089897 | 11.3861519 | 2031.53243 | cg03361102 | 0.00078526 | 56.1226268 | 5.34810866 | 588.946381 |
| cg06498232 | 0.00014643 | 54.6599825 | 6.92974791 | 431.1432   | cg20009641 | 0.00078907 | 30.4650119 | 4.14371598 | 223.981797 |
| cg07971863 | 0.00014728 | 160.441539 | 11.6558495 | 2208.46086 | cg09643398 | 0.00079127 | 76.8986853 | 6.08770231 | 971.369409 |
| cg20631104 | 0.00014769 | 33.3312937 | 5.44934487 | 203.873156 | cg09484039 | 0.0007933  | 21.576983  | 3.58684135 | 129.79838  |
| cg08427573 | 0.00014831 | 20034.139  | 120.067676 | 3342837.47 | cg06517984 | 0.0007957  | 0.00322915 | 0.00011314 | 0.09216561 |
| cg09819651 | 0.00014934 | 4261994115 | 44936.4444 | 4.0423E+14 | cg02900183 | 0.00080011 | 171.606216 | 8.4774256  | 3473.77787 |
| cg24148025 | 0.00015034 | 223148120  | 10759.1434 | 4.6282E+12 | cg01105229 | 0.00080265 | 51.1560572 | 5.12440632 | 510.682024 |
| cg18202861 | 0.00015037 | 24409.2735 | 131.474587 | 4531770.33 | cg07570421 | 0.00080316 | 175550.859 | 150.539661 | 204717506  |
| cg03576419 | 0.00015041 | 16.643708  | 3.88828292 | 71.2430194 | cg10283505 | 0.00080591 | 0.08706536 | 0.02087985 | 0.36304745 |
| cg00863716 | 0.00015056 | 36.5620026 | 5.68531933 | 235.128399 | cg09306340 | 0.00080679 | 84.0014432 | 6.28939302 | 1121.92742 |
| cg09139451 | 0.0001508  | 20093.0993 | 119.569908 | 3376540.52 | cg00405699 | 0.00080939 | 25.7779165 | 3.85008362 | 172.593909 |
| cg19858931 | 0.00015171 | 7031.802   | 71.8913444 | 687791.273 | cg09477740 | 0.00081342 | 87.9625665 | 6.39945652 | 1209.07347 |
| cg00536792 | 0.00015183 | 56.873214  | 7.02922778 | 460.159007 | cg06295308 | 0.00082046 | 1.1721E+13 | 258927.254 | 5.31E+20   |
| cg02900183 | 0.00015296 | 152.915691 | 11.3149262 | 2066.58074 | cg04450332 | 0.00082581 | 33.0761153 | 4.25505551 | 257.11284  |
| cg08042370 | 0.00015448 | 184.821646 | 12.3762613 | 2760.04524 | cg07174453 | 0.00082904 | 3283.23859 | 28.489168  | 378377.341 |
| cg15494117 | 0.00016114 | 3636.14595 | 51.4170548 | 257143.421 | cg13730743 | 0.00083573 | 55.4488407 | 5.25724485 | 584.826087 |
| cg02809401 | 0.0001627  | 121875.958 | 276.96267  | 53630870.5 | cg15593337 | 0.00083739 | 43.4707986 | 4.75243055 | 397.630289 |
| cg06997416 | 0.00016279 | 1.9222E+15 | 21851049.4 | 1.69E+23   | cg09139451 | 0.00084302 | 30335.6868 | 70.8776671 | 12983693.3 |
| cg12563239 | 0.00016384 | 21922.8121 | 121.22424  | 3964633.55 | cg20899053 | 0.00085131 | 14164.6322 | 51.5183809 | 3894470.3  |
| cg03368930 | 0.00016508 | 5885741.61 | 1768.84995 | 1.9584E+10 | cg27157482 | 0.00085865 | 107.215944 | 6.86163076 | 1675.29542 |
| cg19065831 | 0.00016579 | 21.8983922 | 4.39377768 | 109.140612 | cg00481884 | 0.00086294 | 459.423218 | 12.4775241 | 16915.9917 |
| cg09042952 | 0.00016657 | 5263.94988 | 60.8234108 | 455567.486 | cg00536792 | 0.00086806 | 87.0604877 | 6.28246275 | 1206.45817 |
| cg23511432 | 0.00016668 | 9.74951331 | 2.97931333 | 31.9043347 | cg27181253 | 0.00087281 | 132.7199   | 7.46277958 | 2360.32322 |
| cg23876285 | 0.00016843 | 48.5209217 | 6.42130422 | 366.635774 | cg23338737 | 0.00087328 | 8.5521E+12 | 207500.962 | 3.52E+20   |
| cg21388169 | 0.00016844 | 5416766.76 | 1681.50566 | 1.7449E+10 | cg05894557 | 0.00087524 | 0.02591335 | 0.00301406 | 0.22279011 |
| cg16083849 | 0.00016932 | 331484.637 | 440.041321 | 249708514  | cg12416569 | 0.0008787  | 31.8112721 | 4.14311569 | 244.250248 |
| cg13556548 | 0.00016934 | 14.9963193 | 3.65695812 | 61.4963546 | cg18592365 | 0.00088368 | 104.064545 | 6.73341313 | 1608.31206 |



|            |            |            |            |            |            |            |            |            |            |
|------------|------------|------------|------------|------------|------------|------------|------------|------------|------------|
| cg09937039 | 0.00016941 | 24.6084582 | 4.63553642 | 130.637786 | cg09355771 | 0.00088443 | 14.0344178 | 2.95767295 | 66.5945447 |
| cg20593518 | 0.00016961 | 10100653.5 | 2257.60191 | 4.5191E+10 | cg21913319 | 0.00089218 | 11.8064338 | 2.75211924 | 50.6489244 |
| cg10355455 | 0.00016998 | 38340.3002 | 156.418591 | 9397723.21 | cg14277392 | 0.00089621 | 29.5222269 | 4.00467962 | 217.635857 |
| cg18273501 | 0.00017066 | 1461.69249 | 32.7067721 | 65324.237  | cg09279544 | 0.00089677 | 115.850098 | 7.01233305 | 1913.94863 |
| cg14637144 | 0.00017088 | 57.5540816 | 6.95440616 | 476.312748 | cg26697158 | 0.00089901 | 0.00327413 | 0.00011176 | 0.09591827 |
| cg22502206 | 0.00017184 | 14509.5147 | 97.8795217 | 2150868.88 | cg24720717 | 0.0009052  | 6.24921805 | 2.11733484 | 18.4442846 |
| cg15872683 | 0.00017217 | 852975.768 | 686.469613 | 1059868706 | cg03525527 | 0.0009068  | 2.55E+20   | 224911976  | 2.89E+32   |
| cg26580856 | 0.00017226 | 414368.765 | 485.904989 | 353364294  | cg22983529 | 0.00091114 | 29.3171017 | 3.98218829 | 215.834207 |
| cg03114558 | 0.00017412 | 115134.538 | 262.218005 | 50553210   | cg11827182 | 0.00091477 | 104.598717 | 6.69395246 | 1634.44418 |
| cg25851671 | 0.00017458 | 62.7271088 | 7.22449508 | 544.631858 | cg08849717 | 0.00091571 | 258280876  | 2746.94874 | 2.4285E+13 |
| cg20724073 | 0.00017466 | 44616414.6 | 4515.888   | 4.408E+11  | cg02797271 | 0.00091922 | 27.2545015 | 3.85949437 | 192.462478 |
| cg06957820 | 0.00017513 | 205.735658 | 12.735808  | 3323.47669 | cg06727065 | 0.00092239 | 341.741413 | 10.8355961 | 10778.1051 |
| cg26887625 | 0.00017529 | 245436.105 | 375.401931 | 160465029  | cg03017520 | 0.00092464 | 8.49929878 | 2.39596289 | 30.1499159 |
| cg02165978 | 0.0001758  | 1772448.11 | 963.802078 | 3259561679 | cg10959198 | 0.00092488 | 14.7368942 | 2.99958714 | 72.401981  |
| cg25607670 | 0.00017611 | 32.798433  | 5.29418575 | 203.192192 | cg10307580 | 0.00092976 | 1205.6354  | 18.0822661 | 80385.7604 |
| cg01790464 | 0.00017664 | 27.1719522 | 4.8375179  | 152.622688 | cg02015582 | 0.00093718 | 2282.6837  | 23.3903238 | 222769.249 |
| cg01503881 | 0.00017685 | 2184.26668 | 39.2627638 | 121515.158 | cg11722699 | 0.00093749 | 20.3833158 | 3.41735858 | 121.579153 |
| cg22076118 | 0.00017795 | 15172.0521 | 98.8253913 | 2329271.48 | cg12269002 | 0.00094246 | 17.8864481 | 3.237616   | 98.8150006 |
| cg09317036 | 0.00018069 | 2063.55971 | 37.9929272 | 112080.826 | cg17536822 | 0.00094333 | 70.5463576 | 5.66115737 | 879.111505 |
| cg01105229 | 0.00018109 | 39.8819465 | 5.79144082 | 274.641441 | cg26436829 | 0.00094726 | 3.6882E+12 | 130611.625 | 1.04E+20   |
| cg00516051 | 0.00018232 | 894796.597 | 683.351268 | 1171668201 | cg10667810 | 0.00095948 | 262.193501 | 9.61760164 | 7147.87682 |
| cg05082085 | 0.00018234 | 412271009  | 12680.3532 | 1.3404E+13 | cg06101723 | 0.00096088 | 29393699   | 1083.87896 | 7.9713E+11 |
| cg17942851 | 0.00018237 | 23.1508202 | 4.46571312 | 120.016772 | cg00500299 | 0.00096281 | 2859192937 | 6948.81869 | 1.1765E+15 |
| cg04467958 | 0.0001833  | 199353776  | 8939.3643  | 4.4457E+12 | cg12848614 | 0.00096636 | 163.820651 | 7.92955764 | 3384.4518  |
| cg20984053 | 0.00018679 | 148.508757 | 10.7768273 | 2046.50686 | cg04964562 | 0.00096761 | 5.457E+10  | 22884.7313 | 1.3013E+17 |
| cg17803089 | 0.00018759 | 148.151177 | 10.7564123 | 2040.529   | cg01362243 | 0.00096838 | 122.313467 | 7.03876557 | 2125.45567 |
| cg04986336 | 0.00018975 | 335.015672 | 15.8145629 | 7096.97141 | cg24234651 | 0.00097321 | 12.2447816 | 2.76328222 | 54.2596324 |
| cg10014563 | 0.00019014 | 43.3368217 | 5.98635797 | 313.726665 | cg03607638 | 0.00097726 | 55009.8404 | 83.6352064 | 36181922.4 |
| cg16257101 | 0.00019035 | 2106675.44 | 1004.92242 | 4416342331 | cg07972191 | 0.00098094 | 132.10156  | 7.239152   | 2410.6169  |
| cg04876465 | 0.00019103 | 9.9962E+11 | 495913.057 | 2.015E+18  | cg00644823 | 0.00098138 | 40.6980282 | 4.49145492 | 368.773489 |

|            |            |            |            |            |            |            |            |            |            |
|------------|------------|------------|------------|------------|------------|------------|------------|------------|------------|
| cg13021277 | 0.00019234 | 122459.543 | 259.208021 | 57854458.4 | cg15118279 | 0.00098149 | 767114.969 | 242.772598 | 2423936558 |
| cg25349574 | 0.00019412 | 46.2341489 | 6.15576467 | 347.251177 | cg10006582 | 0.00098475 | 401069.402 | 186.253658 | 863642988  |
| cg06184463 | 0.00019496 | 3953.13631 | 50.6516904 | 308524.484 | cg22761176 | 0.00098815 | 14.0678835 | 2.91740024 | 67.8362001 |
| cg02319549 | 0.00019584 | 4.18E-05   | 2.07E-07   | 0.00842097 | cg19912332 | 0.00099704 | 1734244908 | 5461.79303 | 5.5066E+14 |
| cg18425877 | 0.00019734 | 5468.77502 | 58.8529514 | 508173.329 | cg01869698 | 0.00099984 | 22032213.3 | 931.773721 | 5.2096E+11 |
| cg04316429 | 0.00020074 | 175.464022 | 11.5127429 | 2674.22137 | cg05703053 | 0.00100937 | 14.9930346 | 2.98486919 | 75.3101974 |
| cg23600666 | 0.00020338 | 3089313049 | 30401.4035 | 3.1393E+14 | cg01022780 | 0.00101351 | 39.975091  | 4.43206032 | 360.556442 |
| cg05951178 | 0.00020397 | 0.05224886 | 0.01100489 | 0.24806637 | cg01481989 | 0.00101796 | 17.1422949 | 3.14694325 | 93.3789553 |
| cg22956431 | 0.00020399 | 289.536793 | 14.5416749 | 5764.91741 | cg01729739 | 0.00102029 | 555027637  | 3364.32775 | 9.1565E+13 |
| cg01804934 | 0.00020618 | 11.4412666 | 3.15855844 | 41.443774  | cg26090107 | 0.00102345 | 8.31875318 | 2.34934739 | 29.4556926 |
| cg26844213 | 0.00020908 | 27.9379856 | 4.80535289 | 162.429494 | cg01950845 | 0.00102446 | 13.9835728 | 2.89621043 | 67.5159184 |
| cg01158447 | 0.00021008 | 10140.7495 | 77.2221482 | 1331674.96 | cg13932362 | 0.00102479 | 19.2285461 | 3.29285373 | 112.284667 |
| cg15631337 | 0.00021012 | 2.3678E+10 | 77362.0649 | 7.2469E+15 | cg20237547 | 0.00102658 | 40.1119795 | 4.42745393 | 363.407712 |
| cg12992778 | 0.00021052 | 787214002  | 15535.9468 | 3.9889E+13 | cg16492377 | 0.00102877 | 33.880838  | 4.13463053 | 277.633315 |
| cg09539395 | 0.00021147 | 0.00082077 | 1.91E-05   | 0.03520941 | cg04726446 | 0.00102967 | 20.8426455 | 3.39908939 | 127.803604 |
| cg26872028 | 0.00021161 | 14.0885045 | 3.47589108 | 57.1036185 | cg04260516 | 0.00103874 | 142946070  | 1913.27419 | 1.068E+13  |
| cg06632353 | 0.00021373 | 17287520.4 | 2547.10955 | 1.1733E+11 | cg03237606 | 0.00104082 | 95.1259792 | 6.25025607 | 1447.77299 |
| cg00357238 | 0.00021539 | 24187390.2 | 2969.00476 | 1.9705E+11 | cg17222164 | 0.00104315 | 11.6156602 | 2.68138593 | 50.3185911 |
| cg12058507 | 0.00021591 | 0.00304398 | 0.00014133 | 0.06556056 | cg09108404 | 0.00105493 | 1097511394 | 4273.78907 | 2.8184E+14 |
| cg17208816 | 0.00021864 | 1454.25831 | 30.5996912 | 69114.0061 | cg00358155 | 0.00105497 | 176160078  | 2049.77514 | 1.5139E+13 |
| cg18301624 | 0.00021945 | 6092.30617 | 59.9059503 | 619574.42  | cg05211836 | 0.00106223 | 14.2416537 | 2.90323564 | 69.8616045 |
| cg16717690 | 0.00022041 | 159426.134 | 277.00032  | 91756905.7 | cg13255216 | 0.00106645 | 34.6798432 | 4.14631212 | 290.06295  |
| cg15528052 | 0.00022069 | 104445.076 | 226.995875 | 48057146.1 | cg09879099 | 0.00106772 | 171.855082 | 7.875804   | 3749.98785 |
| cg00850821 | 0.00022073 | 393403.125 | 423.007486 | 365870638  | cg21238818 | 0.00107277 | 44.599431  | 4.5811475  | 434.194543 |
| cg06649737 | 0.00022145 | 25.9973526 | 4.61353177 | 146.495652 | cg12114985 | 0.00107479 | 64.1674386 | 5.29798403 | 777.174894 |
| cg04437762 | 0.00022162 | 28.6234526 | 4.82620368 | 169.761182 | cg01731839 | 0.00107688 | 2708493761 | 6002.40079 | 1.2222E+15 |
| cg05487507 | 0.00022403 | 90.6510419 | 8.27512795 | 993.049468 | cg07086112 | 0.00109654 | 358207.508 | 165.772194 | 774029807  |
| cg08089542 | 0.00023066 | 789.048577 | 22.6618477 | 27473.3846 | cg14167139 | 0.00109965 | 1056.71994 | 16.1425414 | 69174.7973 |
| cg18188377 | 0.00023151 | 1403259.52 | 749.652346 | 2626733965 | cg03478631 | 0.00110472 | 26542.7227 | 58.3657992 | 12070701.3 |
| cg15599946 | 0.0002362  | 11890.8837 | 79.9575202 | 1768352.94 | cg05113000 | 0.00110569 | 234603968  | 2194.21116 | 2.5084E+13 |

|            |            |            |            |            |            |            |            |            |            |
|------------|------------|------------|------------|------------|------------|------------|------------|------------|------------|
| cg18530716 | 0.00023713 | 28.1786835 | 4.75122752 | 167.122749 | cg15152115 | 0.00110956 | 315.557741 | 9.93411087 | 10023.7142 |
| cg04394254 | 0.00023726 | 114.597441 | 9.14442804 | 1436.12848 | cg12995933 | 0.00111831 | 1.1756E+11 | 25850.7096 | 5.3464E+17 |
| cg01518459 | 0.00023802 | 0.00119598 | 3.30E-05   | 0.04328332 | cg07234508 | 0.00111842 | 348.996669 | 10.3163082 | 11806.4208 |
| cg18993457 | 0.00023939 | 269364.593 | 341.126629 | 212698974  | cg25098208 | 0.00111924 | 56.8148435 | 5.00299682 | 645.198579 |
| cg08081156 | 0.00024037 | 10.5286732 | 2.99721046 | 36.9853771 | cg04437762 | 0.0011296  | 24.8067859 | 3.59024692 | 171.402313 |
| cg09597785 | 0.00024186 | 620103.034 | 500.73601  | 767925144  | cg10064585 | 0.0011303  | 897496857  | 3660.70108 | 2.2004E+14 |
| cg22235012 | 0.00024268 | 2057.96299 | 34.9810206 | 121071.701 | cg19708133 | 0.00113175 | 0.02956935 | 0.00355001 | 0.24629422 |
| cg19283196 | 0.00024334 | 67.0748185 | 7.09354803 | 634.24273  | cg16761581 | 0.00113723 | 9.18459252 | 2.41555184 | 34.922347  |
| cg08589960 | 0.00024397 | 2314.29056 | 36.8907299 | 145183.921 | cg22122013 | 0.00113772 | 1746.20688 | 19.4685267 | 156623.997 |
| cg13804316 | 0.00024539 | 1388289.52 | 723.481484 | 2663990505 | cg10666406 | 0.00114467 | 87540376.3 | 1432.02737 | 5.3514E+12 |
| cg02245020 | 0.00025006 | 7.73513429 | 2.58803436 | 23.1188208 | cg15545878 | 0.0011488  | 71.4992    | 5.45106886 | 937.822605 |
| cg16347018 | 0.00025061 | 2251.64353 | 36.1415914 | 140278.786 | cg02382037 | 0.00115304 | 26.8561431 | 3.69234348 | 195.337304 |
| cg13686362 | 0.00025087 | 148594.265 | 253.151635 | 87221461   | cg07545140 | 0.00115306 | 6204971785 | 7718.23607 | 4.9884E+15 |
| cg26508844 | 0.00025125 | 4979.90639 | 52.2222737 | 474882.956 | cg27426082 | 0.00115357 | 46240.017  | 71.0898819 | 30076561   |
| cg22243039 | 0.00025325 | 0.0514852  | 0.01050943 | 0.25222348 | cg17132124 | 0.0011586  | 29.2921326 | 3.81855313 | 224.700037 |
| cg23560546 | 0.00025365 | 26.4870284 | 4.5780747  | 153.244043 | cg16157530 | 0.00116409 | 22645003.8 | 824.279952 | 6.2211E+11 |
| cg18096620 | 0.00025427 | 30076.4835 | 119.875293 | 7546132.64 | cg25994146 | 0.00116466 | 156.626797 | 7.415774   | 3308.0773  |
| cg23831021 | 0.00025434 | 1810.75876 | 32.5251024 | 100809.745 | cg24395801 | 0.00116614 | 18.2259085 | 3.16021437 | 105.114306 |
| cg07717381 | 0.00025591 | 9800.13258 | 71.0737439 | 1351309.12 | cg22619719 | 0.00116811 | 406977.029 | 167.12467  | 991058361  |
| cg22761308 | 0.00025615 | 53.5928    | 6.3408586  | 452.965189 | cg17106175 | 0.00117928 | 43.7668707 | 4.4621996  | 429.281327 |
| cg22030047 | 0.00025671 | 149.781899 | 10.21026   | 2197.2621  | cg18953784 | 0.00118176 | 16.2345126 | 3.01262187 | 87.4850575 |
| cg02874942 | 0.00025906 | 26.0385172 | 4.53017875 | 149.663935 | cg26302094 | 0.00118533 | 1.8498E+16 | 2716055.62 | 1.26E+26   |
| cg21644826 | 0.00026006 | 1.1747E+10 | 46321.9822 | 2.9788E+15 | cg14027234 | 0.00118601 | 56.5085128 | 4.93104695 | 647.572828 |
| cg03070194 | 0.00026024 | 125.252205 | 9.37413598 | 1673.55317 | cg16358679 | 0.00118658 | 31.7868583 | 3.92719133 | 257.284221 |
| cg05417285 | 0.00026103 | 1880.48912 | 32.8578228 | 107622.448 | cg24790471 | 0.00119057 | 1251.59027 | 16.7639714 | 93443.1451 |
| cg11764177 | 0.00026146 | 251.920207 | 12.9453171 | 4902.4516  | cg09357934 | 0.00119472 | 73.6142723 | 5.46554711 | 991.494716 |
| cg03578689 | 0.00026338 | 59.3430511 | 6.61945978 | 532.006814 | cg07517893 | 0.00119942 | 6.6943947  | 2.11867754 | 21.1523083 |
| cg23843362 | 0.00026402 | 1521426.56 | 726.010933 | 3188297424 | cg16232698 | 0.00120063 | 82.0045615 | 5.69706793 | 1180.38756 |
| cg20313392 | 0.00026563 | 30146.7788 | 117.98315  | 7703034.45 | cg04900486 | 0.00120272 | 4488462.85 | 422.539992 | 4.7679E+10 |
| cg09168548 | 0.00026567 | 86586.1784 | 192.189089 | 39009323.1 | cg21719787 | 0.00120768 | 1.7532E+14 | 416413.138 | 7.38E+22   |

|            |            |            |            |            |            |            |            |            |            |
|------------|------------|------------|------------|------------|------------|------------|------------|------------|------------|
| cg03348149 | 0.00026756 | 34832.6964 | 125.774996 | 9646724.54 | cg08735211 | 0.00121052 | 13.1463569 | 2.76219617 | 62.5685824 |
| cg11206381 | 0.00026814 | 25.8726072 | 4.49767662 | 148.830576 | cg26202340 | 0.00121077 | 56.3966281 | 4.9053674  | 648.387655 |
| cg07868721 | 0.0002684  | 94.9415727 | 8.20104755 | 1099.11596 | cg04963082 | 0.00121631 | 3880.05545 | 25.9726348 | 579642.013 |
| cg00034416 | 0.00026919 | 3003067.46 | 983.658374 | 9168238107 | cg11350728 | 0.0012276  | 1907303.16 | 296.672815 | 1.2262E+10 |
| cg25746764 | 0.0002697  | 3450.27177 | 43.0873681 | 276284.577 | cg19969694 | 0.00123139 | 16.571167  | 3.01852679 | 90.9727141 |
| cg23924887 | 0.00027025 | 640.726962 | 19.7858593 | 20748.7091 | cg13904877 | 0.00123162 | 0.03062442 | 0.00369681 | 0.25369296 |
| cg07004443 | 0.00027164 | 213.58022  | 11.8995277 | 3833.47235 | cg20929407 | 0.00123244 | 8821923545 | 8183.79858 | 9.5098E+15 |
| cg04329105 | 0.00027179 | 107.327362 | 8.65990257 | 1330.17232 | cg10472567 | 0.00123291 | 68.7293858 | 5.28156684 | 894.380136 |
| cg20899053 | 0.00027191 | 4855.49005 | 50.32135   | 468504.593 | cg13631572 | 0.00123358 | 6.86990637 | 2.13425441 | 22.1133963 |
| cg02927327 | 0.00027582 | 26.4945137 | 4.53132369 | 154.912627 | cg14413354 | 0.00124472 | 81.8907537 | 5.64571911 | 1187.81955 |
| cg02528979 | 0.00027601 | 3279940.58 | 1010.02411 | 1.0651E+10 | cg19928764 | 0.0012451  | 358888.225 | 152.222333 | 846135749  |
| cg23687994 | 0.00027636 | 310663.545 | 340.500435 | 283441160  | cg23500931 | 0.00124667 | 349287945  | 2269.55024 | 5.3756E+13 |
| cg07569219 | 0.00027668 | 2266695.78 | 850.651021 | 6039973636 | cg10506057 | 0.0012511  | 0.04678881 | 0.00728493 | 0.30050974 |
| cg24210813 | 0.00027869 | 36.5090527 | 5.2458232  | 254.089945 | cg00841693 | 0.00125438 | 196.409402 | 7.94401304 | 4856.06618 |
| cg10307580 | 0.0002828  | 1533.77144 | 29.2364811 | 80462.9943 | cg17956609 | 0.00125466 | 85.3310158 | 5.72683349 | 1271.44997 |
| cg26126052 | 0.00028548 | 2530.73132 | 36.7085421 | 174471.68  | cg15574263 | 0.00125674 | 1877.44828 | 19.2533449 | 183075.307 |
| cg05997131 | 0.00028724 | 56943.471  | 153.237985 | 21160281.5 | cg08081156 | 0.00126204 | 11.3023491 | 2.5882765  | 49.3545008 |
| cg06947320 | 0.00028774 | 3722753.78 | 1045.2161  | 1.3259E+10 | cg19700658 | 0.00126276 | 8872.32369 | 35.3298262 | 2228092.69 |
| cg18301048 | 0.00028884 | 6564.7697  | 56.6743654 | 760417.888 | cg03770912 | 0.00126907 | 34.2858223 | 3.99531079 | 294.224322 |
| cg27314482 | 0.00028984 | 109.958759 | 8.65641549 | 1396.75927 | cg27542552 | 0.00127118 | 33.2778175 | 3.94762075 | 280.526729 |
| cg09161136 | 0.00029059 | 653965940  | 11149.294  | 3.8359E+13 | cg02348830 | 0.00127489 | 67227877.5 | 1162.43618 | 3.888E+12  |
| cg06726474 | 0.00029139 | 63919114.7 | 3826.16553 | 1.0678E+12 | cg02776498 | 0.00127516 | 57.2624605 | 4.87959718 | 671.979522 |
| cg02873371 | 0.00029275 | 3627.17571 | 42.9725417 | 306158.377 | cg21791967 | 0.00127578 | 366532.956 | 150.926954 | 890141913  |
| cg11275620 | 0.00029302 | 511548.742 | 416.037772 | 628986436  | cg26987660 | 0.00127636 | 26.0105006 | 3.58180343 | 188.884218 |
| cg03770912 | 0.0002933  | 20.9265369 | 4.03517693 | 108.525588 | cg05628616 | 0.00128176 | 47.2723836 | 4.52178786 | 494.202364 |
| cg03225210 | 0.00029353 | 5.99868909 | 2.27460406 | 15.8200152 | cg04414912 | 0.00128431 | 0.07841894 | 0.01664792 | 0.36938729 |
| cg09257526 | 0.00029355 | 40.9050775 | 5.48708067 | 304.939086 | cg07907506 | 0.00128576 | 23.0354796 | 3.41118881 | 155.556714 |
| cg18025886 | 0.00029405 | 20.8206882 | 4.02460319 | 107.712745 | cg25149391 | 0.00129401 | 244.713791 | 8.58026557 | 6979.36899 |
| cg07174453 | 0.00029499 | 725.310779 | 20.4933668 | 25670.5368 | cg10625931 | 0.00129631 | 147.969485 | 7.0454025  | 3107.69588 |
| cg15243267 | 0.0002977  | 323227.451 | 334.411193 | 312417727  | cg03233656 | 0.0013014  | 61.7913217 | 5.00437712 | 762.96557  |

|            |            |            |            |            |            |            |            |            |            |
|------------|------------|------------|------------|------------|------------|------------|------------|------------|------------|
| cg03697629 | 0.00029781 | 2236813.95 | 811.168071 | 6168064083 | cg16408670 | 0.00132947 | 0.02767883 | 0.00309611 | 0.24744483 |
| cg14043411 | 0.00029854 | 733012846  | 11501.2546 | 4.6717E+13 | cg20641531 | 0.0013297  | 0.07130197 | 0.01421401 | 0.35767317 |
| cg18676229 | 0.00029909 | 17581.3018 | 87.938442  | 3514983.49 | cg22957613 | 0.00133104 | 0.02639938 | 0.0028682  | 0.24298414 |
| cg01038207 | 0.00029927 | 489.304709 | 17.0502544 | 14041.9663 | cg14779329 | 0.00133879 | 68.7617781 | 5.18364838 | 912.134038 |
| cg24229963 | 0.00030298 | 508538826  | 9616.47589 | 2.6893E+13 | cg00905524 | 0.00134134 | 257.800838 | 8.66196601 | 7672.76993 |
| cg07212963 | 0.00030369 | 77877.7968 | 172.704675 | 35117470   | cg12457909 | 0.00134387 | 19.8487231 | 3.19508907 | 123.305422 |
| cg06463010 | 0.00030425 | 133619495  | 5201.6895  | 3.4324E+12 | cg23892568 | 0.00135644 | 24.7432097 | 3.47522    | 176.169113 |
| cg05963821 | 0.00030621 | 26.1584328 | 4.44581655 | 153.911796 | cg21392341 | 0.00135743 | 14.1584562 | 2.79778086 | 71.6503157 |
| cg20495019 | 0.00030842 | 390580589  | 8406.59915 | 1.8147E+13 | cg13695646 | 0.00135753 | 55.9196032 | 4.76848786 | 655.763863 |
| cg10134882 | 0.00030894 | 636.309901 | 19.0769218 | 21224.0892 | cg06263843 | 0.00136052 | 379.631032 | 10.0221579 | 14380.1087 |
| cg05095290 | 0.00031096 | 506.055865 | 17.1548179 | 14928.3158 | cg05233094 | 0.0013726  | 12098940.4 | 556.059792 | 2.6325E+11 |
| cg22652406 | 0.00031604 | 737.926415 | 20.292852  | 26833.8524 | cg05299836 | 0.00137391 | 256.210871 | 8.57815004 | 7652.46706 |
| cg10763374 | 0.00031822 | 0.04241278 | 0.0075903  | 0.23699253 | cg25769935 | 0.00137471 | 52494.4283 | 67.4550366 | 40851879.2 |
| cg13817182 | 0.00031991 | 6064.07228 | 52.7846865 | 696659.867 | cg02889982 | 0.00137874 | 49659.8761 | 65.904459  | 37419369.4 |
| cg19967582 | 0.00032039 | 7230402.28 | 1327.27871 | 3.9388E+10 | cg07185648 | 0.00137928 | 441.153081 | 10.5749433 | 18403.5068 |
| cg10667044 | 0.00032104 | 4904.65268 | 47.8664376 | 502557.096 | cg02167201 | 0.00138051 | 459.933015 | 10.743827  | 19689.295  |
| cg06526620 | 0.00032322 | 0.05710959 | 0.0119965  | 0.27187131 | cg16052317 | 0.00138257 | 17.3581058 | 3.01932295 | 99.7918549 |
| cg17380238 | 0.00032426 | 22.5366702 | 4.12408688 | 123.1549   | cg14560703 | 0.00138433 | 77.674922  | 5.39192671 | 1118.96801 |
| cg19450531 | 0.00032676 | 26476.7036 | 102.395726 | 6846143.48 | cg10581650 | 0.00139038 | 41.8730324 | 4.24105737 | 413.423043 |
| cg04665974 | 0.00032779 | 2185872.85 | 759.80433  | 6288513939 | cg07232612 | 0.00139224 | 17.1199671 | 2.99993058 | 97.7000183 |
| cg09701102 | 0.00032807 | 0.00207723 | 7.14E-05   | 0.06041783 | cg13382703 | 0.00139604 | 38756145.7 | 858.967069 | 1.7487E+12 |
| cg05973813 | 0.00032824 | 9.8409E+14 | 6485816.27 | 1.49E+23   | cg19247841 | 0.00139962 | 28.5398986 | 3.65202062 | 223.034287 |
| cg12947447 | 0.00032959 | 40799.5698 | 124.184226 | 13404318.3 | cg15656257 | 0.00140193 | 153.67799  | 6.99725372 | 3375.17053 |
| cg20511194 | 0.00033392 | 209985.689 | 259.700576 | 169787800  | cg18664712 | 0.00141421 | 1554945.94 | 245.210839 | 9860318179 |
| cg24703125 | 0.00033393 | 283525677  | 6832.95619 | 1.1765E+13 | cg11063170 | 0.00141536 | 0.03726147 | 0.00494131 | 0.28098144 |
| cg24790471 | 0.00033461 | 1216.99536 | 25.0856412 | 59040.8555 | cg05679521 | 0.00141878 | 1.8383E+15 | 773005.49  | 4.37E+24   |
| cg10500406 | 0.00033471 | 723613.056 | 454.65497  | 1151677404 | cg06798491 | 0.00143    | 10615.7268 | 35.581817  | 3167169.79 |
| cg24542714 | 0.00033598 | 28.2244203 | 4.54714862 | 175.190646 | cg23371050 | 0.00143053 | 3428.78438 | 23.0166555 | 510784.997 |
| cg22866937 | 0.00034329 | 45.6850928 | 5.63829115 | 370.17026  | cg00557236 | 0.00143514 | 0.0023696  | 5.76E-05   | 0.097492   |
| cg06998282 | 0.00034505 | 6.43917175 | 2.32208505 | 17.8559062 | cg11641045 | 0.00144194 | 314.366174 | 9.14368006 | 10808.131  |

|            |            |            |            |            |            |            |            |            |            |
|------------|------------|------------|------------|------------|------------|------------|------------|------------|------------|
| cg03712541 | 0.00034566 | 11.3002558 | 2.99429957 | 42.6462944 | cg12281657 | 0.00144255 | 15.0737699 | 2.84055339 | 79.9909411 |
| cg13039082 | 0.00034602 | 28.3913909 | 4.54142873 | 177.492839 | cg08473725 | 0.00144529 | 81.8290404 | 5.44404817 | 1229.96558 |
| cg03100449 | 0.00034624 | 172.138978 | 10.2589589 | 2888.38547 | cg19147218 | 0.00144644 | 10.2521825 | 2.4481036  | 42.9341498 |
| cg21225170 | 0.00034692 | 14.1826396 | 3.31706773 | 60.6400841 | cg15103181 | 0.00145201 | 143.38669  | 6.74650036 | 3047.46783 |
| cg09279544 | 0.00034807 | 79.8589094 | 7.2420457  | 880.613803 | cg17556421 | 0.00145515 | 0.04300077 | 0.0061966  | 0.29840031 |
| cg19544919 | 0.00035009 | 4964.59576 | 46.7416027 | 527307.787 | cg23168192 | 0.00146356 | 27.3346329 | 3.56215764 | 209.7555   |
| cg05984290 | 0.00035013 | 15970.1538 | 79.2371243 | 3218766.63 | cg09745243 | 0.00146411 | 271102.247 | 121.973373 | 602561249  |
| cg25823214 | 0.00035124 | 3.0719E+13 | 1234502.8  | 7.64E+20   | cg06830319 | 0.00146422 | 48.3215597 | 4.43287273 | 526.740394 |
| cg05406954 | 0.00035399 | 18001008.7 | 1881.61479 | 1.7221E+11 | cg07967717 | 0.00146834 | 18.4890511 | 3.06391463 | 111.571323 |
| cg02709432 | 0.00035404 | 12.7481225 | 3.15438224 | 51.5202711 | cg11270005 | 0.00147275 | 7069.30523 | 29.9811355 | 1666884.05 |
| cg22931309 | 0.00035691 | 66643.5791 | 149.799309 | 29648779.2 | cg01025836 | 0.00148    | 11.7728684 | 2.5737025  | 53.8525452 |
| cg19559248 | 0.00035957 | 2526.92757 | 34.1620777 | 186913.776 | cg05221455 | 0.00149472 | 16.4964846 | 2.92448103 | 93.0537761 |
| cg21817720 | 0.00036065 | 5365.98928 | 47.9180067 | 600898.136 | cg27323088 | 0.00149537 | 5522741.7  | 380.982595 | 8.0058E+10 |
| cg06887897 | 0.00036155 | 0.0849546  | 0.0219155  | 0.32932323 | cg16150571 | 0.00149829 | 0.06235267 | 0.01124369 | 0.34578113 |
| cg07195301 | 0.00036259 | 26.1681451 | 4.35021808 | 157.410917 | cg17121747 | 0.00150213 | 6.51301234 | 2.04790452 | 20.713529  |
| cg04849025 | 0.00036365 | 6896064.16 | 1199.60114 | 3.9643E+10 | cg21263269 | 0.00150846 | 0.00075962 | 8.99E-06   | 0.06418359 |
| cg06361403 | 0.00036375 | 18530.4415 | 83.4718753 | 4113688.12 | cg16142824 | 0.00151506 | 0.05862054 | 0.01015738 | 0.33831246 |
| cg22681784 | 0.00036405 | 103.738977 | 8.08305326 | 1331.39979 | cg26222247 | 0.00151957 | 24.8069506 | 3.40862912 | 180.53733  |
| cg09807229 | 0.00036549 | 100175.885 | 178.048363 | 56362259.3 | cg10150530 | 0.00152258 | 8.33366142 | 2.24677115 | 30.9109864 |
| cg17987601 | 0.00036626 | 35290.2166 | 111.233413 | 11196270.6 | cg23177883 | 0.00152428 | 6050.03187 | 27.769512  | 1318096.1  |
| cg02733093 | 0.00036694 | 4070530393 | 21046.1822 | 7.8728E+14 | cg21241889 | 0.0015293  | 37.1757082 | 3.97287642 | 347.867171 |
| cg07483245 | 0.00036707 | 1776.09194 | 28.9612608 | 108921.451 | cg26422458 | 0.00153157 | 37.5381967 | 3.98639661 | 353.481189 |
| cg10625931 | 0.00036713 | 116.696087 | 8.5090493  | 1600.41107 | cg23425316 | 0.00153291 | 7.55049351 | 2.16201483 | 26.3688997 |
| cg24633648 | 0.00036919 | 19292.6516 | 84.4978942 | 4404919.29 | cg06301550 | 0.0015535  | 12.1333516 | 2.58586901 | 56.9318167 |
| cg03196220 | 0.00036944 | 224.398262 | 11.4032159 | 4415.82271 | cg00886812 | 0.00155623 | 78645.9212 | 72.9460447 | 84791176.1 |
| cg15109933 | 0.00037174 | 2.6129E+10 | 47968.5704 | 1.4233E+16 | cg20370281 | 0.00155653 | 30.1314275 | 3.65434857 | 248.444532 |
| cg19792802 | 0.000372   | 11.8234829 | 3.03395475 | 46.0767413 | cg15742840 | 0.00155867 | 0.02114894 | 0.00193965 | 0.23059767 |
| cg18187587 | 0.00037375 | 15803364   | 1710.75355 | 1.4599E+11 | cg22243039 | 0.00155927 | 0.04187294 | 0.00586305 | 0.29904994 |
| cg08872085 | 0.00037395 | 1666546.78 | 622.702028 | 4460204169 | cg12493107 | 0.00156513 | 180.895573 | 7.21618525 | 4534.69628 |
| cg06335889 | 0.00037588 | 8435750.43 | 1285.70827 | 5.5348E+10 | cg04992638 | 0.00156672 | 5.20774092 | 1.87257451 | 14.4830368 |

|            |            |            |            |            |            |            |            |            |            |
|------------|------------|------------|------------|------------|------------|------------|------------|------------|------------|
| cg01030534 | 0.00037706 | 4.72548306 | 2.0075839  | 11.1229175 | cg27262412 | 0.00156835 | 17.084063  | 2.94106665 | 99.2378767 |
| cg13320002 | 0.00037737 | 109207.495 | 182.331803 | 65409746.4 | cg05700129 | 0.00157421 | 20.6477152 | 3.15863689 | 134.972192 |
| cg10005098 | 0.00037764 | 3.724E+10  | 55375.6778 | 2.5043E+16 | cg02469457 | 0.00157433 | 529109.343 | 149.369389 | 1874257497 |
| cg20313628 | 0.00038187 | 65.922262  | 6.53721377 | 664.770157 | cg06080793 | 0.00157782 | 15.0318579 | 2.79881756 | 80.7329336 |
| cg25975979 | 0.00038323 | 117.380038 | 8.46073677 | 1628.47205 | cg09350274 | 0.00157866 | 14.4598992 | 2.75766485 | 75.8209197 |
| cg01370129 | 0.00038337 | 16703605.6 | 1723.88611 | 1.6185E+11 | cg19065831 | 0.00158311 | 21.2091454 | 3.18785174 | 141.106892 |
| cg17922215 | 0.000384   | 5433.51995 | 47.1438093 | 626235.756 | cg21951729 | 0.00158528 | 48.1320536 | 4.34966741 | 532.614191 |
| cg19965941 | 0.00038435 | 176113.347 | 223.906457 | 138521736  | cg16838838 | 0.00158982 | 239.77167  | 7.99289986 | 7192.69035 |
| cg02448276 | 0.00038449 | 511.186523 | 16.3448153 | 15987.4344 | cg13787135 | 0.00159253 | 27.7818905 | 3.5278196  | 218.784839 |
| cg21841239 | 0.00038461 | 127.598169 | 8.77688793 | 1855.01886 | cg26570683 | 0.00159459 | 234.21392  | 7.91469544 | 6930.92497 |
| cg03756034 | 0.00038544 | 23.3853144 | 4.10313294 | 133.281796 | cg00557360 | 0.00159614 | 13.0265319 | 2.64620365 | 64.1260294 |
| cg06664874 | 0.00038776 | 4042.97739 | 41.1591002 | 397133.709 | cg11589885 | 0.00159736 | 0.00817811 | 0.00041353 | 0.16173133 |
| cg10147666 | 0.00038871 | 22.8413413 | 4.05571045 | 128.640069 | cg14042912 | 0.00159853 | 3275.34002 | 21.493369  | 499123.812 |
| cg07091842 | 0.00038881 | 4059.87654 | 41.1978329 | 400084.09  | cg04452432 | 0.00159905 | 23.5153433 | 3.30922071 | 167.100179 |
| cg07294234 | 0.00038911 | 16924.3637 | 78.0199237 | 3671294.1  | cg21870145 | 0.00160325 | 22.2391808 | 3.2384623  | 152.720988 |
| cg25355065 | 0.00038955 | 12618.5267 | 68.3846771 | 2328404.88 | cg08863777 | 0.00160703 | 0.06815847 | 0.01284659 | 0.36161935 |
| cg15897774 | 0.00039034 | 240052.802 | 255.224265 | 225783186  | cg01860897 | 0.00160824 | 10.6182258 | 2.4463781  | 46.0872007 |
| cg10368049 | 0.00039199 | 16.7224259 | 3.5240368  | 79.3520452 | cg08158952 | 0.00161101 | 10.591043  | 2.44343366 | 45.9067887 |
| cg11063170 | 0.0003927  | 0.044864   | 0.00806392 | 0.24960313 | cg06459662 | 0.0016138  | 10450477.8 | 453.382256 | 2.4088E+11 |
| cg07361448 | 0.00039457 | 3.33E-08   | 2.44E-12   | 0.00045522 | cg01258201 | 0.00162277 | 21.4255    | 3.18624969 | 144.072843 |
| cg20385284 | 0.00039544 | 0.03587801 | 0.00569368 | 0.22608091 | cg20588892 | 0.0016233  | 1.3524E+13 | 92291.3397 | 1.98E+21   |
| cg23837756 | 0.00039577 | 4519046.85 | 940.589821 | 2.1712E+10 | cg01790464 | 0.00162336 | 20.5829064 | 3.1380757  | 135.005041 |
| cg23969515 | 0.00039746 | 7189830.31 | 1154.2593  | 4.4785E+10 | cg22637507 | 0.00162824 | 114.558958 | 6.00072724 | 2187.0274  |
| cg00690402 | 0.00039803 | 56.515957  | 6.05954979 | 527.110678 | cg22415969 | 0.0016307  | 53.1291639 | 4.48677978 | 629.116692 |
| cg18202577 | 0.00039866 | 10850.494  | 63.355558  | 1858293.48 | cg00496961 | 0.00163321 | 59.2954136 | 4.67515874 | 752.048491 |
| cg10856045 | 0.00040239 | 50.0062964 | 5.72720459 | 436.623075 | cg05031016 | 0.00163348 | 13.8282157 | 2.69735432 | 70.8915204 |
| cg14998896 | 0.00040304 | 21.0184568 | 3.88982839 | 113.571983 | cg16714002 | 0.00163383 | 215.523496 | 7.61160315 | 6102.57479 |
| cg08681432 | 0.00040322 | 20284.1591 | 83.3826951 | 4934442.47 | cg06263193 | 0.00163503 | 16.9811451 | 2.91452255 | 98.9387745 |
| cg21219327 | 0.00040358 | 148589677  | 4411.32388 | 5.005E+12  | cg14637144 | 0.0016359  | 54.8524154 | 4.53787856 | 663.038342 |
| cg26277456 | 0.00040372 | 162638.872 | 210.884227 | 125430920  | cg07485357 | 0.0016371  | 10.7024783 | 2.44775671 | 46.7951085 |

|            |            |            |            |            |            |            |            |            |            |
|------------|------------|------------|------------|------------|------------|------------|------------|------------|------------|
| cg25062542 | 0.00040459 | 21031.5824 | 84.6211884 | 5227147.79 | cg05883874 | 0.00164426 | 16.6784318 | 2.89213885 | 96.1814429 |
| cg24448952 | 0.00040771 | 950578.203 | 460.850189 | 1960721599 | cg03457528 | 0.00164564 | 2641.16453 | 19.5505096 | 356806.56  |
| cg15586420 | 0.00041174 | 730.952116 | 18.8308634 | 28373.1545 | cg26532627 | 0.00164682 | 19.2951885 | 3.05484613 | 121.873339 |
| cg27387222 | 0.00041363 | 0.04356359 | 0.00765222 | 0.24800466 | cg07528363 | 0.00165057 | 81.1684549 | 5.24982749 | 1254.95897 |
| cg24461171 | 0.00041441 | 47.966764  | 5.59532019 | 411.202642 | cg16754665 | 0.00165169 | 255.477126 | 8.08841306 | 8069.39032 |
| cg00981594 | 0.00041568 | 25271.3158 | 90.8034832 | 7033203.82 | cg05021846 | 0.0016527  | 26.3760182 | 3.43492571 | 202.535483 |
| cg19901191 | 0.00042034 | 45327.3497 | 117.161991 | 17536136.2 | cg02324920 | 0.0016539  | 160.218497 | 6.78066864 | 3785.75744 |
| cg03949306 | 0.00042177 | 23463.3095 | 87.3201123 | 6304697.47 | cg09171882 | 0.00167297 | 35.7484232 | 3.84249091 | 332.583678 |
| cg04900427 | 0.00042332 | 11.6316371 | 2.97264219 | 45.5133761 | cg01814495 | 0.00167332 | 2672276548 | 3531.54233 | 2.0221E+15 |
| cg19708133 | 0.00042626 | 0.04046547 | 0.00679544 | 0.24096379 | cg15074033 | 0.00167629 | 24.4460748 | 3.32914289 | 179.508838 |
| cg12027420 | 0.00042799 | 23.4932743 | 4.0557134  | 136.088004 | cg22330492 | 0.00168436 | 67.227425  | 4.86551751 | 928.889201 |
| cg22971415 | 0.00043064 | 200625.655 | 224.099681 | 179610491  | cg00487737 | 0.00170637 | 74.6418781 | 5.04422434 | 1104.51272 |
| cg03404102 | 0.0004324  | 8482.13647 | 55.0498305 | 1306936.62 | cg17446896 | 0.00171034 | 13.8069902 | 2.67695877 | 71.2125196 |
| cg19118262 | 0.00043365 | 45375.8288 | 115.588631 | 17812875   | cg09668344 | 0.00171071 | 17.4656436 | 2.92359596 | 104.340241 |
| cg08160980 | 0.00043396 | 7.78419897 | 2.48182228 | 24.4150252 | cg18425877 | 0.00171096 | 2418.32474 | 18.5804991 | 314754.439 |
| cg05125578 | 0.00043798 | 16.5931432 | 3.46660535 | 79.4242133 | cg16552437 | 0.00172512 | 4253.28306 | 22.8706098 | 790989.701 |
| cg05094271 | 0.00043951 | 829102.909 | 415.459226 | 1654582664 | cg16475951 | 0.00173803 | 280733.651 | 109.266731 | 721275199  |
| cg09223516 | 0.00044012 | 10679.2454 | 60.5457211 | 1883639.03 | cg21400015 | 0.00174069 | 32.8140579 | 3.69062646 | 291.755995 |
| cg21095811 | 0.00044077 | 3257117.68 | 759.708375 | 1.3964E+10 | cg16368008 | 0.00174297 | 0.06915486 | 0.01298776 | 0.36822333 |
| cg06035374 | 0.00044146 | 39614613.7 | 2291.15188 | 6.8495E+11 | cg02718824 | 0.00174557 | 35631893.6 | 666.213019 | 1.9057E+12 |
| cg07554759 | 0.00044222 | 62.7051142 | 6.23308285 | 630.816474 | cg14806045 | 0.00175206 | 22775790.4 | 561.481039 | 9.2387E+11 |
| cg27423729 | 0.00044348 | 241773135  | 5079.65647 | 1.1508E+13 | cg10368049 | 0.001756   | 17.7048743 | 2.92564204 | 107.143174 |
| cg05417332 | 0.00044374 | 4212.83928 | 40.0068267 | 443624.657 | cg20385284 | 0.00176195 | 0.0317335  | 0.00365167 | 0.27576865 |
| cg13169065 | 0.00044381 | 867.262569 | 19.8930009 | 37809.4973 | cg04604505 | 0.00176301 | 2.336E+11  | 17538.4641 | 3.1114E+18 |
| cg14921691 | 0.00044507 | 90.670306  | 7.32808705 | 1121.86227 | cg08247376 | 0.00177068 | 6.86637458 | 2.05185509 | 22.9777922 |
| cg25544073 | 0.00044997 | 89903.1885 | 153.724982 | 52578203   | cg03627290 | 0.0017707  | 27.4558986 | 3.44105396 | 219.068452 |
| cg01354296 | 0.00045338 | 264.548714 | 11.7109166 | 5976.1353  | cg05011526 | 0.00177132 | 500.895299 | 10.1648471 | 24682.7224 |
| cg13581941 | 0.00045635 | 530307.132 | 333.857686 | 842351895  | cg27387222 | 0.00177139 | 0.04319848 | 0.00602493 | 0.30973106 |
| cg13109300 | 0.00045897 | 402110.508 | 294.588616 | 548876814  | cg17658717 | 0.00177237 | 70.1013705 | 4.88041493 | 1006.92302 |
| cg27510007 | 0.0004629  | 21139.618  | 80.1724308 | 5574028.95 | cg07375367 | 0.00178115 | 72552.0492 | 64.8047774 | 81225490.6 |



|            |            |            |            |            |            |            |            |            |            |
|------------|------------|------------|------------|------------|------------|------------|------------|------------|------------|
| cg10059484 | 0.00046472 | 440.553482 | 14.5718904 | 13319.2994 | cg13817182 | 0.00178434 | 8650.17125 | 29.3053411 | 2553304.61 |
| cg07030951 | 0.00046689 | 3387335.17 | 745.127258 | 1.5399E+10 | cg20020464 | 0.00178719 | 148686.913 | 84.4725664 | 261715714  |
| cg18859544 | 0.00046782 | 3.6604E+10 | 44217.096  | 3.0302E+16 | cg12841566 | 0.0017954  | 501042264  | 1731.48271 | 1.4499E+14 |
| cg21880079 | 0.00046844 | 218104.452 | 222.594519 | 213704957  | cg27204544 | 0.00179873 | 32012.4146 | 47.4847033 | 21581575   |
| cg02622866 | 0.00046889 | 7338.65043 | 50.0758018 | 1075485.33 | cg22031999 | 0.00179945 | 2900.56999 | 19.4269401 | 433074.187 |
| cg10812348 | 0.00047004 | 17300.8229 | 72.9363726 | 4103829.97 | cg05356496 | 0.00180256 | 27.339597  | 3.42364856 | 218.320763 |
| cg02167201 | 0.00047247 | 291.662485 | 12.1046653 | 7027.6214  | cg12985477 | 0.00181357 | 2234.94878 | 17.5680606 | 284322.566 |
| cg13880726 | 0.00047346 | 2.72E-05   | 7.50E-08   | 0.00987905 | cg13316191 | 0.00181664 | 226.04008  | 7.49333233 | 6818.61095 |
| cg17925360 | 0.00047424 | 6.05E+20   | 1340025212 | 2.73E+32   | cg15951557 | 0.00181723 | 17.7841185 | 2.91348681 | 108.55545  |
| cg24287218 | 0.00047594 | 21.8299969 | 3.87166045 | 123.086404 | cg01931792 | 0.00181811 | 61.2120183 | 4.61100614 | 812.601647 |
| cg00129981 | 0.00047883 | 0.00657836 | 0.00039228 | 0.11031477 | cg20308679 | 0.00181852 | 10.5260985 | 2.39745655 | 46.2151232 |
| cg27542552 | 0.00047979 | 38.9749019 | 4.98732631 | 304.580628 | cg17077566 | 0.00181882 | 0.05202528 | 0.0081155  | 0.33351354 |
| cg06604199 | 0.00048003 | 31.521226  | 4.54356147 | 218.680367 | cg16773799 | 0.00182011 | 18368.6721 | 38.3524582 | 8797561.59 |
| cg10330832 | 0.00048117 | 17397045.6 | 1497.81437 | 2.0207E+11 | cg18328334 | 0.00182078 | 39.2748966 | 3.90896816 | 394.609892 |
| cg20237547 | 0.00048138 | 29.6824682 | 4.42352248 | 199.173605 | cg05403387 | 0.00182193 | 3637.7171  | 21.0075769 | 629914.9   |
| cg01493678 | 0.00048195 | 28.8072581 | 4.36508996 | 190.11249  | cg23876285 | 0.00182195 | 30.359622  | 3.55202159 | 259.487906 |
| cg25165701 | 0.00048218 | 24.4287851 | 4.06039775 | 146.972189 | cg16259747 | 0.00182361 | 1166040.84 | 178.915432 | 7599407271 |
| cg09954820 | 0.00048297 | 19.0770728 | 3.64241658 | 99.9157284 | cg23283234 | 0.00182736 | 3619994.05 | 271.976576 | 4.8182E+10 |
| cg14555988 | 0.00048367 | 23514472.7 | 1702.96779 | 3.2469E+11 | cg18449964 | 0.00183187 | 40.0067904 | 3.93062821 | 407.197831 |
| cg16157530 | 0.00048673 | 4402617.31 | 813.682199 | 2.3821E+10 | cg09667023 | 0.00183451 | 3.7421E+14 | 254692.523 | 5.50E+23   |
| cg12269002 | 0.00048728 | 15.3804331 | 3.31074066 | 71.4516011 | cg08438366 | 0.00184285 | 27.1822062 | 3.40151374 | 217.218683 |
| cg07310282 | 0.0004878  | 296765.901 | 249.355057 | 353191152  | cg09648722 | 0.0018433  | 8529.37347 | 28.6475143 | 2539494.73 |
| cg11828766 | 0.00049016 | 708382.586 | 363.991529 | 1378619689 | cg09142117 | 0.00185526 | 135291968  | 1025.4376  | 1.785E+13  |
| cg25415989 | 0.0004929  | 331.087042 | 12.6636116 | 8656.19014 | cg03157027 | 0.00185655 | 21.4124929 | 3.10938442 | 147.455184 |
| cg13442432 | 0.00049617 | 10.6143567 | 2.80911576 | 40.1067727 | cg22657536 | 0.00185742 | 63.9207732 | 4.66102622 | 876.602073 |
| cg06611606 | 0.00049711 | 270273889  | 4853.95029 | 1.5049E+13 | cg26151000 | 0.00186244 | 529.391257 | 10.1847812 | 27517.047  |
| cg06830319 | 0.00049796 | 34.2893295 | 4.68818828 | 250.791574 | cg02621694 | 0.00186362 | 39.8616385 | 3.91052822 | 406.32624  |
| cg01773760 | 0.00049948 | 320.623383 | 12.4456923 | 8259.83412 | cg10500147 | 0.00186677 | 11.7251295 | 2.48591218 | 55.3031049 |
| cg13183282 | 0.00050111 | 34685594.1 | 1966.4271  | 6.1182E+11 | cg11335133 | 0.00186953 | 9.42545717 | 2.29258614 | 38.7506674 |
| cg11815708 | 0.00050152 | 52.5550561 | 5.64331765 | 489.434425 | cg02276831 | 0.00187107 | 100.545458 | 5.50090323 | 1837.76894 |

|            |            |            |            |            |            |            |            |            |            |
|------------|------------|------------|------------|------------|------------|------------|------------|------------|------------|
| cg20308679 | 0.000506   | 9.14056104 | 2.62642719 | 31.8112212 | cg21201393 | 0.00187133 | 18.7997055 | 2.95900306 | 119.441893 |
| cg22225546 | 0.00050629 | 2429.70532 | 30.0166079 | 196673.387 | cg02486590 | 0.00187389 | 203499027  | 1179.21602 | 3.5118E+13 |
| cg22336806 | 0.00050924 | 7.8963778  | 2.46255331 | 25.3203787 | cg27162464 | 0.00187591 | 224.170429 | 7.39321958 | 6797.09029 |
| cg09205595 | 0.00051265 | 70.7861491 | 6.40118702 | 782.773396 | cg09700470 | 0.00188085 | 34.1526586 | 3.68596464 | 316.444731 |
| cg10581650 | 0.00051412 | 29.3232173 | 4.35782133 | 197.312144 | cg14425609 | 0.00188201 | 6.91E+23   | 641152784  | 7.44E+38   |
| cg26920587 | 0.00051522 | 8297.18798 | 50.9480695 | 1351245.08 | cg10856045 | 0.00188277 | 51.3950558 | 4.28573926 | 616.335153 |
| cg22517356 | 0.00051582 | 38.1781309 | 4.88623662 | 298.301084 | cg00929411 | 0.00188456 | 561.701389 | 10.3640417 | 30442.6073 |
| cg18714412 | 0.00051995 | 189.147264 | 9.79241015 | 3653.51195 | cg12837296 | 0.00188779 | 1450601.9  | 188.422808 | 1.1168E+10 |
| cg13436879 | 0.00052089 | 50903782.4 | 2256.6344  | 1.1483E+12 | cg19904411 | 0.00188813 | 7727.67142 | 27.2651866 | 2190225.45 |
| cg25768103 | 0.00052171 | 11815783.5 | 1193.90911 | 1.1694E+11 | cg02096793 | 0.00189034 | 15.5776242 | 2.75569433 | 88.0585247 |
| cg05794119 | 0.000529   | 47099.0192 | 107.205679 | 20692165.2 | cg19094597 | 0.00189129 | 8778.7595  | 28.5537177 | 2699004.7  |
| cg08724866 | 0.00053013 | 276696.246 | 231.100189 | 331288404  | cg14542839 | 0.0018922  | 107.035116 | 5.61192768 | 2041.45823 |
| cg15007132 | 0.00053104 | 7779917.99 | 983.240591 | 6.1559E+10 | cg17202086 | 0.00189533 | 10.4713911 | 2.37897363 | 46.0913183 |
| cg27020690 | 0.00053146 | 2920.89623 | 31.9822124 | 266761.871 | cg16300030 | 0.00189839 | 209.988287 | 7.18923644 | 6133.48593 |
| cg15253473 | 0.00053392 | 8253.12856 | 50.1193938 | 1359037.41 | cg06222206 | 0.00190461 | 0.03030316 | 0.00333329 | 0.27548833 |
| cg00352195 | 0.00053489 | 3244835037 | 13414.2498 | 7.8491E+14 | cg05951178 | 0.00190736 | 0.05913601 | 0.0099182  | 0.35259082 |
| cg09697857 | 0.00054211 | 15174.1412 | 64.8638522 | 3549813.25 | cg17387989 | 0.00191128 | 26.2724102 | 3.33496426 | 206.970595 |
| cg13538257 | 0.00054218 | 832.060122 | 18.4295716 | 37565.9328 | cg18316621 | 0.00192441 | 29.50121   | 3.47564182 | 250.40595  |
| cg07972191 | 0.00054282 | 101.495571 | 7.40346642 | 1391.42267 | cg21158815 | 0.00192672 | 16.1840327 | 2.78590854 | 94.017054  |
| cg21913319 | 0.00054438 | 9.47531959 | 2.64883285 | 33.8948081 | cg17246382 | 0.00192837 | 21.8724297 | 3.11199076 | 153.728985 |
| cg15453599 | 0.00055359 | 1020828.57 | 396.812883 | 2626152051 | cg17034360 | 0.00193011 | 34514.524  | 46.7292085 | 25492671.7 |
| cg15235373 | 0.00055437 | 903824.142 | 376.138645 | 2171800454 | cg10794285 | 0.00193367 | 8.38487902 | 2.18606777 | 32.1610323 |
| cg00254079 | 0.00055528 | 164296185  | 3562.50535 | 7.577E+12  | cg21152671 | 0.00193396 | 23.265532  | 3.1817556  | 170.121482 |
| cg22345522 | 0.00055741 | 834065.189 | 362.101737 | 1921185869 | cg18978493 | 0.00195103 | 16.0910496 | 2.77416029 | 93.3334237 |
| cg01818648 | 0.0005577  | 9363.51816 | 52.0178722 | 1685487.48 | cg24910161 | 0.0019553  | 75.3046496 | 4.88692037 | 1160.40161 |
| cg20991612 | 0.00055939 | 38.0611192 | 4.81671418 | 300.754568 | cg03269218 | 0.00195885 | 21.6756022 | 3.09262049 | 151.920267 |
| cg24395801 | 0.00056059 | 15.0994903 | 3.22988141 | 70.5891574 | cg15844609 | 0.00197964 | 4205.86967 | 21.2667489 | 831783.916 |
| cg04624228 | 0.0005634  | 19.7611711 | 3.6254796  | 107.710958 | cg03751272 | 0.00198235 | 220.986243 | 7.22318697 | 6760.85496 |
| cg08693600 | 0.00056422 | 3726795563 | 13522.4681 | 1.0271E+15 | cg02132284 | 0.00198312 | 14.5440369 | 2.66598712 | 79.3435971 |
| cg03460682 | 0.00056493 | 36.0731757 | 4.69899478 | 276.926038 | cg25607670 | 0.00198564 | 27.6557822 | 3.3726663  | 226.776746 |

|            |            |            |            |             |            |            |            |            |            |
|------------|------------|------------|------------|-------------|------------|------------|------------|------------|------------|
| cg08799865 | 0.00056559 | 1.334E+14  | 1244460.81 | 1.43E+22    | cg01597066 | 0.00198843 | 6.83423389 | 2.0210961  | 23.1096151 |
| cg19677989 | 0.00056786 | 1579.76639 | 23.9673442 | 104127.592  | cg17799946 | 0.00199257 | 22.1716259 | 3.10840518 | 158.145726 |
| cg19568591 | 0.00056819 | 11.8928084 | 2.90914138 | 48.6187754  | cg18309286 | 0.00199333 | 7.53822304 | 2.0943254  | 27.1327496 |
| cg12615761 | 0.00056851 | 6.63115006 | 2.26113288 | 19.4469558  | cg24174307 | 0.00200099 | 1489.31117 | 14.4690342 | 153296.187 |
| cg06440553 | 0.00057323 | 1502.87986 | 23.3850918 | 96584.9478  | cg04809274 | 0.00200235 | 38.1222599 | 3.7862637  | 383.836629 |
| cg08863777 | 0.00057338 | 0.0741915  | 0.01688342 | 0.32602278  | cg23510258 | 0.00200599 | 15.8144027 | 2.74372698 | 91.1516832 |
| cg18805367 | 0.00057472 | 6.9615E+14 | 2477445.44 | 1.96E+23    | cg16285902 | 0.00200826 | 1981432647 | 2500.81515 | 1.5699E+15 |
| cg07797438 | 0.00057538 | 91735976.5 | 2689.87987 | 3.1286E+12  | cg13997864 | 0.00200832 | 14.2723962 | 2.64223231 | 77.0943918 |
| cg17842066 | 0.00057562 | 699882.873 | 329.259676 | 1487689114  | cg15929495 | 0.00201298 | 2.0468E+10 | 5851.36565 | 7.1595E+16 |
| cg10717074 | 0.00057593 | 963.305513 | 19.2786939 | 48133.837   | cg10631694 | 0.00201717 | 1.5714E+13 | 66027.1944 | 3.74E+21   |
| cg23963591 | 0.00057653 | 42.0753342 | 5.00468884 | 353.735029  | cg04346127 | 0.00201729 | 1621888.92 | 185.389653 | 1.4189E+10 |
| cg18357908 | 0.00057956 | 1111486.18 | 400.141316 | 3087413062  | cg22970435 | 0.00202201 | 34.8279593 | 3.65542398 | 331.832028 |
| cg05386508 | 0.0005807  | 64841.1901 | 117.663031 | 35732378.4  | cg01476568 | 0.00202508 | 5.89387501 | 1.91069719 | 18.180674  |
| cg27179932 | 0.00058175 | 15832.8613 | 64.0940965 | 39111116.81 | cg24258806 | 0.00202856 | 383115795  | 1355.07539 | 1.0832E+14 |
| cg04776910 | 0.00058218 | 354114.963 | 243.93905  | 514052207   | cg11832722 | 0.00202928 | 14.9626526 | 2.68362906 | 83.4247091 |
| cg08091398 | 0.00058572 | 1.85E-07   | 2.69E-11   | 0.00127544  | cg08048963 | 0.00203154 | 2711002.28 | 222.229643 | 3.3072E+10 |
| cg26302094 | 0.00058579 | 2.2918E+16 | 10807542.5 | 4.86E+25    | cg04608177 | 0.00203211 | 13.6984465 | 2.59798966 | 72.2279381 |
| cg06055845 | 0.00058589 | 44.4536502 | 5.11060499 | 386.671837  | cg25129124 | 0.00203289 | 22.9116063 | 3.13394836 | 167.501709 |
| cg17077566 | 0.00058771 | 0.05293502 | 0.00990831 | 0.28280462  | cg14273450 | 0.00203569 | 9.13763516 | 2.24074005 | 37.2628571 |
| cg17929951 | 0.00058803 | 14.3042091 | 3.13740087 | 65.2165302  | cg17733447 | 0.00203653 | 17.3286948 | 2.82953436 | 106.124764 |
| cg15837119 | 0.00058866 | 54016.9512 | 108.048403 | 27004851    | cg07036561 | 0.00204021 | 71127.7425 | 58.7157924 | 86163458.6 |
| cg05700129 | 0.00058866 | 20.9251451 | 3.69406793 | 118.531036  | cg06275813 | 0.00204249 | 83.3529097 | 5.01323591 | 1385.87285 |
| cg09847789 | 0.00059003 | 298862.124 | 225.058161 | 396868831   | cg27614319 | 0.00205184 | 17.0859436 | 2.81134658 | 103.83973  |
| cg06834274 | 0.00059026 | 138.447486 | 8.3151518  | 2305.1541   | cg15372689 | 0.00205391 | 14.9812293 | 2.67947484 | 83.761649  |
| cg13647118 | 0.00059066 | 378873.753 | 249.048748 | 576374393   | cg18805367 | 0.00205649 | 2.5202E+19 | 11564009   | 5.49E+31   |
| cg00898147 | 0.00059289 | 49.4619836 | 5.33948872 | 458.187656  | cg22935921 | 0.00206255 | 18.8128371 | 2.90894582 | 121.667044 |
| cg17900356 | 0.00059468 | 25.4423559 | 4.01179372 | 161.352632  | cg11412713 | 0.00209066 | 0.02062274 | 0.00174039 | 0.24436926 |
| cg21465517 | 0.00059471 | 2.4705E+11 | 77687.3965 | 7.8561E+17  | cg26070636 | 0.0020919  | 2251046679 | 2482.62827 | 2.0411E+15 |
| cg19844724 | 0.00060171 | 24321.1437 | 75.9219795 | 7791130.27  | cg17892169 | 0.00209285 | 41.1699814 | 3.85519986 | 439.657457 |
| cg26964592 | 0.00060182 | 0.01734346 | 0.00171072 | 0.17582983  | cg08464498 | 0.00210605 | 4005.8392  | 20.2430827 | 792702.768 |

|            |            |            |            |            |            |            |            |            |            |
|------------|------------|------------|------------|------------|------------|------------|------------|------------|------------|
| cg06809635 | 0.00060328 | 0.00026423 | 2.39E-06   | 0.02927154 | cg27528222 | 0.00210737 | 29.0829079 | 3.39339183 | 249.253719 |
| cg09684870 | 0.00060503 | 3482.92557 | 32.9327714 | 368349.519 | cg02423574 | 0.00211312 | 32780.3455 | 43.2861836 | 24824342.5 |
| cg01411912 | 0.0006105  | 27.8142539 | 4.15184744 | 186.334573 | cg17272843 | 0.00211539 | 42.0311788 | 3.87467782 | 455.939842 |
| cg03007010 | 0.00061217 | 2395960.99 | 537.093244 | 1.0688E+10 | cg05247767 | 0.00211987 | 1182069.43 | 158.263221 | 8828887318 |
| cg05280555 | 0.0006124  | 822.905011 | 17.6827804 | 38295.5984 | cg22336806 | 0.0021255  | 8.15410998 | 2.13762352 | 31.1044059 |
| cg23054032 | 0.00061521 | 43468.6316 | 96.3452778 | 19611982.8 | cg02007844 | 0.00212646 | 19.8504542 | 2.94967985 | 133.587559 |
| cg25004679 | 0.00061647 | 99868.2998 | 137.365486 | 72606864.9 | cg00821731 | 0.00213179 | 41.0429452 | 3.8345936  | 439.296449 |
| cg25145687 | 0.00062067 | 0.05218768 | 0.0096192  | 0.28313711 | cg01916115 | 0.00213297 | 15.9295619 | 2.72240881 | 93.2082433 |
| cg13908523 | 0.00062266 | 2.876E+14  | 1500954.21 | 5.51E+22   | cg11248254 | 0.00214127 | 253.375217 | 7.39765482 | 8678.29091 |
| cg09648722 | 0.0006252  | 2760.5848  | 29.4615095 | 258670.671 | cg18933494 | 0.0021425  | 101.681527 | 5.3168885  | 1944.58336 |
| cg17876200 | 0.0006255  | 649878.386 | 303.294137 | 1392515928 | cg05412137 | 0.00214614 | 12.3657842 | 2.4816736  | 61.6167331 |
| cg06594008 | 0.00062789 | 26.812847  | 4.07006613 | 176.638104 | cg20984053 | 0.00214647 | 93.5147703 | 5.15567577 | 1696.19128 |
| cg10959198 | 0.00062845 | 9.4243681  | 2.60471574 | 34.0991966 | cg06096427 | 0.002149   | 501314438  | 1391.9516  | 1.8055E+14 |
| cg23336454 | 0.00062875 | 25123.4511 | 75.4451836 | 8366177.49 | cg05082085 | 0.00215039 | 1182409015 | 1896.31736 | 7.3727E+14 |
| cg25794571 | 0.00063484 | 766445.079 | 322.458922 | 1821745406 | cg03434479 | 0.00215402 | 2.2059E+10 | 5444.58187 | 8.9374E+16 |
| cg04575016 | 0.0006358  | 3305011.62 | 600.599544 | 1.8187E+10 | cg01420215 | 0.00215479 | 176924.575 | 78.5800845 | 398349090  |
| cg09413557 | 0.00063699 | 3971.00384 | 34.1668783 | 461525.087 | cg01249180 | 0.00215713 | 2349272.2  | 199.766472 | 2.7628E+10 |
| cg12937378 | 0.00063819 | 180197.854 | 173.455834 | 187201927  | cg04550737 | 0.00215852 | 7.55634037 | 2.07548726 | 27.510783  |
| cg02671213 | 0.00063889 | 54.5881502 | 5.49535202 | 542.252094 | cg21290280 | 0.0021644  | 2.1E+10    | 5310.73127 | 8.3039E+16 |
| cg05679521 | 0.00064281 | 5.727E+14  | 1917224.16 | 1.71E+23   | cg26045220 | 0.00216547 | 29.7431404 | 3.40158048 | 260.071578 |
| cg27337492 | 0.00064593 | 267178.919 | 203.73557  | 350378555  | cg17942851 | 0.00217245 | 20.8062826 | 2.98823141 | 144.868766 |
| cg17937683 | 0.00064807 | 1024680.97 | 360.202878 | 2914943671 | cg09261514 | 0.00218408 | 7.656E+10  | 8351.24438 | 7.0186E+17 |
| cg14113931 | 0.00064882 | 0.07286656 | 0.01617369 | 0.32828234 | cg07067280 | 0.00218856 | 5.4657E+10 | 7372.93966 | 4.0519E+17 |
| cg24502391 | 0.00065044 | 6996.94695 | 43.1272067 | 1135182.88 | cg09205595 | 0.00219162 | 141.670524 | 5.95238344 | 3371.84886 |
| cg15746396 | 0.00065221 | 6686.06422 | 42.255386  | 1057935.07 | cg03003256 | 0.00219263 | 76.4373672 | 4.76581751 | 1225.9536  |
| cg03069638 | 0.00065376 | 212188.397 | 183.455476 | 245421487  | cg17838765 | 0.00219829 | 24.8930962 | 3.1803322  | 194.843243 |
| cg07844977 | 0.00065445 | 7.49553389 | 2.35339736 | 23.8731586 | cg26796245 | 0.00219947 | 12.7849015 | 2.50197059 | 65.3299871 |
| cg08141342 | 0.00065458 | 121.968476 | 7.69850927 | 1932.36232 | cg18128969 | 0.00220128 | 52.8954283 | 4.17004541 | 670.958243 |
| cg18316621 | 0.00065502 | 20.6225966 | 3.61741753 | 117.567709 | cg25239996 | 0.00220702 | 13.9623763 | 2.58110793 | 75.5287874 |
| cg07233502 | 0.00065573 | 1564052.23 | 427.876304 | 5717211623 | cg05766064 | 0.00220756 | 13.0705196 | 2.52045344 | 67.7808528 |

|            |            |            |            |            |            |            |            |            |            |
|------------|------------|------------|------------|------------|------------|------------|------------|------------|------------|
| cg02501882 | 0.00065627 | 406.015881 | 12.8236178 | 12855.1005 | cg07051728 | 0.00220767 | 1483.76079 | 13.8223615 | 159274.238 |
| cg26534477 | 0.0006566  | 0.04908011 | 0.00866633 | 0.27795598 | cg06892501 | 0.00220959 | 0.06192767 | 0.01042804 | 0.36776183 |
| cg15551525 | 0.00065783 | 23655.4735 | 72.0115745 | 7770715.05 | cg08872085 | 0.00221263 | 3357036.09 | 221.893891 | 5.0789E+10 |
| cg09254823 | 0.00065813 | 5285.36693 | 38.1010476 | 733184.658 | cg03976754 | 0.00221416 | 46905.7565 | 47.7694286 | 46057699.6 |
| cg04387237 | 0.00066134 | 385173.774 | 234.743318 | 632004512  | cg06594008 | 0.0022161  | 28.2181281 | 3.32151685 | 239.72865  |
| cg13901143 | 0.00066163 | 9949.51939 | 49.7297469 | 1990618.14 | cg18875012 | 0.00222562 | 89.1610762 | 5.01639008 | 1584.74468 |
| cg13770691 | 0.00066473 | 795.22156  | 16.9942965 | 37211.1507 | cg17126533 | 0.00222591 | 1.1509E+11 | 9384.21174 | 1.4114E+18 |
| cg27528222 | 0.00066532 | 24.3811217 | 3.87517492 | 153.396712 | cg23621729 | 0.00223225 | 15.2516948 | 2.65924907 | 87.4736396 |
| cg09209002 | 0.00066534 | 24438.6409 | 72.6292189 | 8223235.49 | cg06285333 | 0.00223472 | 2369.83691 | 16.260725  | 345379.863 |
| cg26657230 | 0.00066593 | 12011.118  | 53.7158646 | 2685742.06 | cg00863716 | 0.00223634 | 32.0821978 | 3.47143516 | 296.496223 |
| cg07696485 | 0.00066704 | 24.370207  | 3.87296601 | 153.346812 | cg25789861 | 0.00223733 | 10.7642806 | 2.34579152 | 49.3947295 |
| cg03751272 | 0.00066818 | 139.139137 | 8.10356365 | 2389.03528 | cg08279757 | 0.00224049 | 40795.1542 | 45.0751464 | 36921557.4 |
| cg18357291 | 0.00067272 | 9733246.16 | 912.753715 | 1.0379E+11 | cg06059849 | 0.00224309 | 20.6962152 | 2.96446159 | 144.489416 |
| cg12619880 | 0.0006751  | 50.9578638 | 5.2835526  | 491.469298 | cg02029665 | 0.0022461  | 43.5888888 | 3.87102362 | 490.823982 |
| cg27637948 | 0.00067575 | 101.263246 | 7.06525686 | 1451.36196 | cg00713366 | 0.00225304 | 7798851.61 | 295.062642 | 2.0613E+11 |
| cg20787196 | 0.0006808  | 218.41232  | 9.76482367 | 4885.28447 | cg18701685 | 0.00225356 | 8.9726311  | 2.19526169 | 36.6735817 |
| cg00841693 | 0.00068096 | 199.285128 | 9.39290952 | 4228.14276 | cg02978959 | 0.00225694 | 168003.462 | 74.4801358 | 378962295  |
| cg03911494 | 0.00068141 | 2.1697E+14 | 1160447.59 | 4.06E+22   | cg09395021 | 0.00226093 | 81512.9866 | 57.407121  | 115741164  |
| cg12104022 | 0.00068613 | 0.01282938 | 0.00103771 | 0.15861156 | cg23656386 | 0.00226626 | 128.974612 | 5.69597256 | 2920.38812 |
| cg21998208 | 0.00068678 | 19.5464986 | 3.51301318 | 108.757237 | cg16098170 | 0.00226976 | 3365.99062 | 18.2968087 | 619227.814 |
| cg22608128 | 0.00069038 | 9.95831857 | 2.64026693 | 37.5598799 | cg27043726 | 0.0022714  | 12.13167   | 2.44282616 | 60.2488296 |
| cg02015582 | 0.00069051 | 594.509866 | 14.8531816 | 23795.7086 | cg02532824 | 0.002273   | 29.9879229 | 3.37656518 | 266.328495 |
| cg04416750 | 0.00069349 | 754.965565 | 16.4086477 | 34736.1351 | cg02168442 | 0.002274   | 39.4577588 | 3.72458083 | 418.010723 |
| cg19866195 | 0.00069551 | 21.6682853 | 3.66276707 | 128.185761 | cg04567307 | 0.00227741 | 19.9712588 | 2.91841264 | 136.667163 |
| cg03434479 | 0.00069827 | 1.1647E+10 | 17650.6989 | 7.6848E+15 | cg26416971 | 0.00228405 | 12.1891765 | 2.44481727 | 60.7718317 |
| cg17733447 | 0.00069836 | 18.7373495 | 3.44291889 | 101.974016 | cg24680586 | 0.00228583 | 7.19996935 | 2.02517141 | 25.5976153 |
| cg11475922 | 0.0007002  | 689502.898 | 290.020318 | 1639244624 | cg08067617 | 0.00229259 | 24.8417841 | 3.15109649 | 195.841111 |
| cg17892539 | 0.00070034 | 975409.226 | 335.667031 | 2834425400 | cg21950518 | 0.00229313 | 203.837792 | 6.68361801 | 6216.66971 |
| cg25634545 | 0.00070065 | 50523.9829 | 96.2896416 | 26510357.8 | cg18233810 | 0.00229654 | 15797792.3 | 372.462739 | 6.7005E+11 |
| cg13459361 | 0.00070179 | 2619.92992 | 27.6258595 | 248464.046 | cg00255368 | 0.00230225 | 39.016047  | 3.69900825 | 411.529746 |

|            |            |            |            |            |            |            |            |            |            |
|------------|------------|------------|------------|------------|------------|------------|------------|------------|------------|
| cg19928764 | 0.00070237 | 287373.61  | 200.139942 | 412629236  | cg24693053 | 0.00231049 | 14.0134576 | 2.56486852 | 76.5641557 |
| cg17759086 | 0.00070307 | 61.6343313 | 5.68227664 | 668.533237 | cg18853219 | 0.00231334 | 89987.6421 | 58.5017172 | 138419454  |
| cg02524205 | 0.00070566 | 11.839784  | 2.83333011 | 49.475522  | cg11255208 | 0.00231869 | 169.493971 | 6.23472438 | 4607.77487 |
| cg07381000 | 0.00071001 | 74.4512182 | 6.14114621 | 902.597611 | cg25542733 | 0.00232348 | 7543513.46 | 282.706551 | 2.0129E+11 |
| cg18719814 | 0.000711   | 27049.1277 | 73.4687471 | 9958728.57 | cg12827530 | 0.00232597 | 10.8109512 | 2.33573794 | 50.0384324 |
| cg07730673 | 0.00071197 | 2361.1476  | 26.3023637 | 211958.821 | cg26440289 | 0.0023315  | 4.94086394 | 1.76659243 | 13.8187712 |
| cg26985469 | 0.00071508 | 209712.242 | 173.449259 | 253556717  | cg24684576 | 0.00233348 | 141.960237 | 5.84113455 | 3450.13607 |
| cg03514404 | 0.00071521 | 4.86148547 | 1.94520334 | 12.1499077 | cg03756034 | 0.00233426 | 23.7667318 | 3.09046748 | 182.774142 |
| cg01840244 | 0.00071572 | 66632.6762 | 107.01688  | 41487974.2 | cg03671191 | 0.00233699 | 18.6499402 | 2.8342094  | 122.72215  |
| cg14042879 | 0.00071782 | 2574.05498 | 27.1935447 | 243651.907 | cg12766383 | 0.00233765 | 2.4198E+11 | 11299.4812 | 5.1821E+18 |
| cg24503449 | 0.00071911 | 33.1861821 | 4.36082495 | 252.549161 | cg22638491 | 0.00234459 | 17.3566114 | 2.76097461 | 109.110732 |
| cg04117530 | 0.00071993 | 10.1381286 | 2.64822622 | 38.8115073 | cg24580593 | 0.0023455  | 2312195365 | 2147.57231 | 2.4894E+15 |
| cg10305451 | 0.00072039 | 7.71153584 | 2.36032576 | 25.1947363 | cg10230885 | 0.00234775 | 60945.5702 | 50.3856076 | 73718720.5 |
| cg08410301 | 0.00072271 | 1.4309E+10 | 18538.7999 | 1.1044E+16 | cg02534163 | 0.00235528 | 9.75155395 | 2.24736741 | 42.3129766 |
| cg25444017 | 0.00072332 | 140.537105 | 7.99032972 | 2471.82265 | cg07444414 | 0.00235589 | 85.8907424 | 4.87079847 | 1514.58117 |
| cg10334703 | 0.00072337 | 26.0628944 | 3.93594693 | 172.582221 | cg00220769 | 0.00236169 | 548101.58  | 109.523753 | 2742924097 |
| cg05652493 | 0.00072458 | 7308719.57 | 765.281567 | 6.9801E+10 | cg03469057 | 0.00236204 | 63549467   | 592.980167 | 6.8106E+12 |
| cg01085803 | 0.00072628 | 26.3941643 | 3.95444425 | 176.169359 | cg10717074 | 0.00236448 | 5113.59438 | 20.7849034 | 1258069.23 |
| cg00405699 | 0.00072646 | 18.348537  | 3.39425423 | 99.1878585 | cg03025013 | 0.00236528 | 289.778274 | 7.49451554 | 11204.3865 |
| cg04881464 | 0.00072685 | 3799.2447  | 31.8764686 | 452818.675 | cg19151808 | 0.0023742  | 43.6190857 | 3.8208824  | 497.954253 |
| cg18940113 | 0.00072694 | 105.548525 | 7.07679865 | 1574.22751 | cg05950711 | 0.00237583 | 49.3148578 | 3.99038023 | 609.454503 |
| cg22607959 | 0.00072702 | 104066.638 | 128.001067 | 84607616.2 | cg05341097 | 0.00237652 | 673.406447 | 10.0924658 | 44932.1554 |
| cg10589018 | 0.0007291  | 1.20E-06   | 4.43E-10   | 0.00327169 | cg23666930 | 0.00237796 | 16099.2325 | 31.1309311 | 8325651.63 |
| cg17950435 | 0.00072926 | 87549276.1 | 2160.24605 | 3.5481E+12 | cg24542751 | 0.00237817 | 5.85619749 | 1.87265806 | 18.3135671 |
| cg16575322 | 0.00073046 | 14.2761715 | 3.05257502 | 66.7662779 | cg11540838 | 0.00237856 | 5.4094E+15 | 383862.039 | 7.62E+25   |
| cg24938064 | 0.000732   | 3928.6869  | 32.2391303 | 478753.012 | cg24888944 | 0.00237938 | 52010221.9 | 547.654192 | 4.9394E+12 |
| cg17394304 | 0.00073255 | 40.9286509 | 4.74740335 | 352.856992 | cg07898632 | 0.00238096 | 11.8258089 | 2.4027658  | 58.2036574 |
| cg25120284 | 0.0007328  | 26.5206224 | 3.95691078 | 177.750636 | cg18703238 | 0.00238224 | 14.5773319 | 2.58767688 | 82.1194513 |
| cg12072333 | 0.00073508 | 2873049.9  | 511.757255 | 1.613E+10  | cg07365404 | 0.00238555 | 1.672E+10  | 4232.73594 | 6.6049E+16 |
| cg12810402 | 0.00073714 | 7371.1184  | 41.8592961 | 1298000.48 | cg05435286 | 0.00239042 | 33.8050646 | 3.48494258 | 327.920005 |

|            |            |            |            |            |            |            |            |            |            |
|------------|------------|------------|------------|------------|------------|------------|------------|------------|------------|
| cg13437538 | 0.00073841 | 197.09365  | 9.1632514  | 4239.31477 | cg22126440 | 0.00239169 | 29.3334898 | 3.31356235 | 259.676303 |
| cg27614319 | 0.00073991 | 18.0997197 | 3.36637671 | 97.3152684 | cg22325715 | 0.00240309 | 0.01702307 | 0.00122679 | 0.23621314 |
| cg05799276 | 0.00074274 | 1.1408E+14 | 775600.476 | 1.68E+22   | cg08141342 | 0.00240595 | 272.109902 | 7.28415527 | 10165.0495 |
| cg02922601 | 0.000743   | 786.74926  | 16.3395358 | 37882.0064 | cg01574788 | 0.00241117 | 23.6048231 | 3.06282184 | 181.919713 |
| cg02282382 | 0.00074334 | 2704.31541 | 27.4043939 | 266866.762 | cg17394304 | 0.00241333 | 44.6167324 | 3.83639092 | 518.886852 |
| cg12309516 | 0.00074425 | 549891.005 | 253.798091 | 1191419982 | cg01462607 | 0.00242142 | 20.2596585 | 2.89912707 | 141.578397 |
| cg01870903 | 0.00074704 | 11771.3172 | 50.6368452 | 2736424.61 | cg17980625 | 0.00242434 | 11.4273608 | 2.36703011 | 55.1681088 |
| cg21109744 | 0.00074718 | 13.6452917 | 2.98682628 | 62.3384051 | cg13094036 | 0.00243684 | 0.01813745 | 0.00135685 | 0.24244939 |
| cg03549127 | 0.00074823 | 24000.9858 | 68.1841953 | 8448399.48 | cg01431908 | 0.00244626 | 13.2791016 | 2.49242674 | 70.7481331 |
| cg01852715 | 0.00074889 | 2946.76559 | 28.3280035 | 306531.572 | cg02404489 | 0.00244633 | 2908200088 | 2197.1247  | 3.8494E+15 |
| cg19240052 | 0.00075007 | 986.332938 | 17.9072795 | 54327.2172 | cg08296969 | 0.00245166 | 37316354.9 | 470.732909 | 2.9582E+12 |
| cg05894557 | 0.00075133 | 0.04528189 | 0.00748602 | 0.27390375 | cg09004287 | 0.00245871 | 23.6517733 | 3.0528102  | 183.243092 |
| cg15658376 | 0.00075221 | 4.1498E+11 | 72558.9674 | 2.37E+18   | cg10197666 | 0.00246318 | 18858061.4 | 368.082587 | 9.6616E+11 |
| cg04452432 | 0.00075237 | 17.5349206 | 3.31440316 | 92.7688714 | cg16368146 | 0.00246478 | 25.7381444 | 3.1436035  | 210.730163 |
| cg22248683 | 0.00075394 | 7904194.4  | 767.60054  | 8.1392E+10 | cg00516051 | 0.00247191 | 1135824.06 | 136.213979 | 9471100623 |
| cg23543123 | 0.00075405 | 50.1590804 | 5.14264195 | 489.229734 | cg03048083 | 0.00248041 | 4.56023973 | 1.70654142 | 12.1859253 |
| cg16119852 | 0.00075446 | 279272.103 | 189.543316 | 411478014  | cg20184247 | 0.00248482 | 29.7679523 | 3.30318242 | 268.265833 |
| cg07218275 | 0.0007562  | 1612.61179 | 21.9352879 | 118554.031 | cg21087137 | 0.00248611 | 8.87124395 | 2.15660149 | 36.4921241 |
| cg06199563 | 0.00075828 | 14786.4576 | 55.3314151 | 3951450.15 | cg14847134 | 0.00249055 | 106.251006 | 5.16659644 | 2185.05092 |
| cg00173504 | 0.00075858 | 18.2417109 | 3.36582822 | 98.8642301 | cg08038761 | 0.00249415 | 377466.328 | 91.6983214 | 1553799748 |
| cg16150571 | 0.00075906 | 0.08033495 | 0.01851386 | 0.34858769 | cg10129408 | 0.00249516 | 15.8535756 | 2.64400856 | 95.0586402 |
| cg23212579 | 0.00076001 | 0.00048013 | 5.62E-06   | 0.04103895 | cg16352928 | 0.00249635 | 27.1376947 | 3.19415282 | 230.563319 |
| cg08704611 | 0.00076239 | 6700375.1  | 710.391645 | 6.3198E+10 | cg04352704 | 0.00250273 | 3858857.03 | 207.080881 | 7.1908E+10 |
| cg02783970 | 0.0007629  | 2.2588E+11 | 55277.7459 | 9.2304E+17 | cg24903183 | 0.00250705 | 6.89459838 | 1.9713756  | 24.1128513 |
| cg23281832 | 0.00076292 | 58598.4278 | 98.0734879 | 35012273.1 | cg24963041 | 0.00250834 | 17916.9355 | 31.2643536 | 10267814.3 |
| cg03075736 | 0.00076313 | 371814.048 | 212.158288 | 651615771  | cg22344830 | 0.00251247 | 14.2633304 | 2.54444273 | 79.9556583 |
| cg21100807 | 0.00076336 | 35437373.3 | 1423.02662 | 8.8249E+11 | cg05990544 | 0.00251621 | 11.046842  | 2.32537279 | 52.4787763 |
| cg20773694 | 0.00076667 | 1311012.74 | 358.015141 | 4800786931 | cg04006913 | 0.00251907 | 538661784  | 1165.98132 | 2.4885E+14 |
| cg23687909 | 0.00076716 | 20.7913527 | 3.54921792 | 121.795944 | cg16993579 | 0.00252263 | 5916.03633 | 21.1105784 | 1657912.21 |
| cg26831148 | 0.00076721 | 1847.84061 | 23.1002158 | 147813.118 | cg25294502 | 0.00253001 | 197.059708 | 6.38678581 | 6080.13633 |

|            |            |            |            |             |            |            |            |            |            |
|------------|------------|------------|------------|-------------|------------|------------|------------|------------|------------|
| cg20368283 | 0.00076783 | 65.4165537 | 5.72610117 | 747.336692  | cg27124109 | 0.00253088 | 2772540430 | 2059.38754 | 3.7327E+15 |
| cg22935653 | 0.00076809 | 822.20421  | 16.4683798 | 41049.5611  | cg23192824 | 0.00253114 | 12250.767  | 27.2025534 | 5517176.67 |
| cg18642271 | 0.00077038 | 142666.475 | 141.439488 | 143904105   | cg21693907 | 0.00253502 | 45.2289818 | 3.80846982 | 537.134571 |
| cg06709324 | 0.000772   | 2774028298 | 8690.85218 | 8.8544E+14  | cg19646112 | 0.00253526 | 14.5532623 | 2.55847178 | 82.7827945 |
| cg11528307 | 0.00077354 | 13927.7684 | 53.4769958 | 3627405.21  | cg08983217 | 0.00253762 | 22.700774  | 2.98973904 | 172.36459  |
| cg02317785 | 0.00077611 | 3.1634E+13 | 424585.938 | 2.36E+21    | cg27639942 | 0.00254098 | 14.9628534 | 2.5824786  | 86.694613  |
| cg20607710 | 0.00077969 | 5.3582E+10 | 29537.0064 | 9.7202E+16  | cg02015876 | 0.00254294 | 20.5736242 | 2.88713091 | 146.607143 |
| cg06127885 | 0.00078161 | 69.3939569 | 5.84775662 | 823.481818  | cg02583525 | 0.00254327 | 22.8577184 | 2.99561413 | 174.413416 |
| cg18309286 | 0.00078174 | 7.16628425 | 2.27122507 | 22.6114227  | cg25479916 | 0.00254453 | 8.64265575 | 2.12992462 | 35.0695502 |
| cg02767164 | 0.00078378 | 47962.5232 | 88.956023  | 25860009.9  | cg11538128 | 0.00254642 | 15.1952393 | 2.59548773 | 88.9602736 |
| cg23227500 | 0.00078475 | 825931.595 | 290.751526 | 2346206087  | cg17604407 | 0.00255112 | 1564440204 | 1666.30104 | 1.4688E+15 |
| cg02417033 | 0.00078768 | 17.3766358 | 3.28124044 | 92.0223545  | cg24238564 | 0.00255583 | 76042.5467 | 51.2579465 | 112811170  |
| cg12439423 | 0.00079012 | 52.2476894 | 5.18506952 | 526.477232  | cg21352006 | 0.00255588 | 33.6298692 | 3.42599687 | 330.113583 |
| cg19355621 | 0.00079246 | 28110.2734 | 70.8266085 | 11156647    | cg14638988 | 0.00255924 | 38.0542465 | 3.57646367 | 404.904345 |
| cg20725013 | 0.00079247 | 13.8180934 | 2.98050304 | 64.0629128  | cg25510614 | 0.00255954 | 29.2252305 | 3.26057484 | 261.951999 |
| cg06312003 | 0.00079358 | 3018.66988 | 27.9866438 | 325597.021  | cg09806575 | 0.00256231 | 18547311.3 | 350.565194 | 9.8128E+11 |
| cg15571373 | 0.00079522 | 0.08202127 | 0.019026   | 0.35359456  | cg08196842 | 0.00258545 | 25.3069899 | 3.09368976 | 207.016148 |
| cg21532077 | 0.00079563 | 48.166943  | 5.00608687 | 463.446691  | cg04986336 | 0.00258906 | 390.409231 | 8.04601704 | 18943.4557 |
| cg15068083 | 0.00079741 | 1.4809E+11 | 43877.7936 | 4.9979E+17  | cg19792802 | 0.00259007 | 12.4359681 | 2.41266377 | 64.1006442 |
| cg20427865 | 0.0008003  | 17.6222497 | 3.29322426 | 94.2977638  | cg10648455 | 0.00259192 | 0.00082775 | 8.18E-06   | 0.08379407 |
| cg15767556 | 0.00080086 | 1750.23499 | 22.2378012 | 137752.942  | cg02451774 | 0.00259879 | 47.69454   | 3.85577324 | 589.964453 |
| cg15827505 | 0.00080211 | 857679.739 | 291.131361 | 2526744392  | cg21759784 | 0.0026009  | 0.02430776 | 0.00216318 | 0.27314789 |
| cg09537434 | 0.00080218 | 59428.8574 | 96.074056  | 367611111.5 | cg24503449 | 0.00260511 | 40.8393543 | 3.65024785 | 456.914964 |
| cg18270926 | 0.0008047  | 43.5266628 | 4.78977233 | 395.544975  | cg27179622 | 0.00260567 | 10.9341514 | 2.30439731 | 51.8815342 |
| cg07722358 | 0.00080637 | 12.3604682 | 2.83947966 | 53.8060467  | cg13401703 | 0.00260794 | 9.35297311 | 2.18185428 | 40.0934687 |
| cg05212510 | 0.00080822 | 0.00755954 | 0.00043378 | 0.13174216  | cg04040095 | 0.00260916 | 127.110577 | 5.42272911 | 2979.51427 |
| cg00207534 | 0.00080944 | 21515.9955 | 62.7299519 | 7379856.84  | cg06466348 | 0.00261131 | 18.0149734 | 2.74197576 | 118.359641 |
| cg22923268 | 0.00081542 | 44523.0872 | 84.4965789 | 23460184.1  | cg16391678 | 0.0026143  | 41.2488163 | 3.65982997 | 464.902703 |
| cg17794169 | 0.00081629 | 49855.8982 | 88.5039107 | 28084754.3  | cg26669421 | 0.00261466 | 63864795.7 | 527.75194  | 7.7285E+12 |
| cg05031016 | 0.00081737 | 11.0727003 | 2.70845889 | 45.2673259  | cg23737575 | 0.00261534 | 0.0610397  | 0.00988042 | 0.37709379 |



|            |            |            |            |            |            |            |            |            |            |
|------------|------------|------------|------------|------------|------------|------------|------------|------------|------------|
| cg25533361 | 0.00082086 | 157886.593 | 142.245583 | 175247454  | cg01528028 | 0.00261578 | 35.8669841 | 3.48517905 | 369.117493 |
| cg01636650 | 0.00082233 | 28.944927  | 4.02924981 | 207.931709 | cg20739396 | 0.00261678 | 1713561.66 | 149.284939 | 1.9669E+10 |
| cg01931792 | 0.00082257 | 36.4706698 | 4.43368257 | 300.001125 | cg15826897 | 0.0026195  | 11.3487159 | 2.33255057 | 55.2156742 |
| cg06222206 | 0.00082559 | 0.04209047 | 0.00657379 | 0.26949565 | cg12718671 | 0.00262595 | 3720.63852 | 17.5549522 | 788561.022 |
| cg16053142 | 0.0008259  | 448046.242 | 218.259037 | 919757720  | cg26742995 | 0.00263684 | 7.53329153 | 2.02022578 | 28.0911578 |
| cg19690901 | 0.00082764 | 418325.542 | 211.864638 | 825981443  | cg00079898 | 0.00264956 | 0.06243459 | 0.01023169 | 0.38098075 |
| cg21551185 | 0.00082775 | 60.7087744 | 5.46837735 | 673.976035 | cg07358855 | 0.00265232 | 16.4451759 | 2.64851203 | 102.111603 |
| cg09415957 | 0.00082795 | 82.3581714 | 6.20358198 | 1093.37934 | cg01627847 | 0.00265363 | 6.09820528 | 1.87546441 | 19.8287462 |
| cg23873523 | 0.00083592 | 617.069683 | 14.2306971 | 26757.2973 | cg08938584 | 0.00265436 | 49.5473568 | 3.88625413 | 631.698412 |
| cg05257472 | 0.00083689 | 15.7511302 | 3.12444385 | 79.4055245 | cg02447095 | 0.00265514 | 257703267  | 841.859338 | 7.8886E+13 |
| cg14220654 | 0.00083691 | 8909.47508 | 42.876325  | 1851342.11 | cg25123046 | 0.00265779 | 976389637  | 1336.10402 | 7.1352E+14 |
| cg15979473 | 0.00083718 | 44.3736809 | 4.79319353 | 410.795756 | cg12210040 | 0.00266248 | 1420.53688 | 12.4678846 | 161849.832 |
| cg05997362 | 0.00084112 | 372.335291 | 11.5284406 | 12025.3531 | cg19183867 | 0.0026816  | 0.03036753 | 0.00310181 | 0.29730588 |
| cg18140857 | 0.00084231 | 35.8826233 | 4.38575933 | 293.578046 | cg07046854 | 0.00268302 | 221778476  | 788.495975 | 6.2379E+13 |
| cg20631254 | 0.0008456  | 5.2505E+10 | 26580.0415 | 1.0372E+17 | cg14796261 | 0.00269261 | 151.934218 | 5.71108675 | 4041.96391 |
| cg06726056 | 0.00085516 | 9.5249E+10 | 33517.1916 | 2.7068E+17 | cg26067203 | 0.00269478 | 7.08004248 | 1.9714883  | 25.4259696 |
| cg25463478 | 0.00085671 | 24245234.9 | 1104.43513 | 5.3225E+11 | cg18050520 | 0.00269752 | 28.8747481 | 3.20931508 | 259.790971 |
| cg22188058 | 0.00085682 | 4385.48285 | 31.6826866 | 607033.743 | cg08182191 | 0.00269919 | 35132879.1 | 413.095376 | 2.988E+12  |
| cg15376007 | 0.00086192 | 1019837.38 | 298.040562 | 3489687059 | cg14412322 | 0.00271005 | 20.2625365 | 2.83578986 | 144.781668 |
| cg20716058 | 0.00086344 | 29.7629376 | 4.04318415 | 219.09278  | cg14744703 | 0.00271357 | 127590.985 | 58.6616314 | 277514605  |
| cg01861031 | 0.00086507 | 229291294  | 2762.22788 | 1.9033E+13 | cg18154114 | 0.00271741 | 144344.937 | 61.1543623 | 340702776  |
| cg15765486 | 0.00086733 | 42.5743618 | 4.68136536 | 387.189664 | cg00727673 | 0.00272115 | 63.4435231 | 4.20635702 | 956.904184 |
| cg26881035 | 0.00086831 | 19808667.9 | 1004.95909 | 3.9045E+11 | cg08870042 | 0.0027277  | 16.0171532 | 2.61084621 | 98.2628531 |
| cg26555401 | 0.00086974 | 138.347369 | 7.59779651 | 2519.15071 | cg06151074 | 0.00272872 | 25.9503405 | 3.08497822 | 218.290089 |
| cg02324920 | 0.00087472 | 102.458254 | 6.70613595 | 1565.38636 | cg24542714 | 0.00273125 | 27.8846436 | 3.16202209 | 245.903832 |
| cg17157872 | 0.00088027 | 21.4105057 | 3.52016825 | 130.223819 | cg14176626 | 0.00273426 | 19.2536008 | 2.78118663 | 133.288842 |
| cg15951557 | 0.00088534 | 13.3560288 | 2.89774396 | 61.5594432 | cg17299902 | 0.00274353 | 1.8936E+10 | 3563.96757 | 1.0061E+17 |
| cg13652991 | 0.00088616 | 37.5466526 | 4.4283943  | 318.343631 | cg16854917 | 0.00274526 | 9.54349173 | 2.18049895 | 41.7694466 |
| cg15227302 | 0.0008872  | 183045967  | 2458.64855 | 1.3628E+13 | cg27298072 | 0.00274588 | 0.06130364 | 0.0098619  | 0.38107635 |
| cg19598514 | 0.00088857 | 556.12164  | 13.3759021 | 23121.5267 | cg25396971 | 0.00274957 | 29.860168  | 3.23288867 | 275.799672 |

|            |            |            |            |            |            |            |            |            |            |
|------------|------------|------------|------------|------------|------------|------------|------------|------------|------------|
| cg25138715 | 0.00088978 | 1305.60281 | 18.9751116 | 89833.3945 | cg07177860 | 0.00275909 | 101.62502  | 4.93040937 | 2094.68299 |
| cg11267546 | 0.00089351 | 14.4656933 | 2.99061268 | 69.9710409 | cg14896516 | 0.00276053 | 0.03628964 | 0.00413738 | 0.31830214 |
| cg04453677 | 0.00089509 | 2038272.56 | 385.796738 | 1.0769E+10 | cg07994696 | 0.00276137 | 51.5014218 | 3.89836393 | 680.38708  |
| cg25551287 | 0.00089532 | 490451128  | 3651.14479 | 6.5881E+13 | cg01931502 | 0.00276567 | 4524945464 | 2147.34172 | 9.5351E+15 |
| cg20557104 | 0.00089579 | 10.5998949 | 2.63185849 | 42.6914182 | cg24641522 | 0.00276765 | 27.3898541 | 3.13333079 | 239.427037 |
| cg03033176 | 0.00089701 | 2402.38004 | 24.292307  | 237582.617 | cg18020334 | 0.00276795 | 63.0966305 | 4.17865368 | 952.743416 |
| cg19711258 | 0.0008991  | 713.089434 | 14.7556127 | 34461.2284 | cg01041284 | 0.00276801 | 744.061852 | 9.78938384 | 56553.921  |
| cg26966013 | 0.00090128 | 1019.46271 | 17.0684402 | 60890.4045 | cg14851471 | 0.0027704  | 193.319681 | 6.14714472 | 6079.65172 |
| cg22474865 | 0.00090161 | 3.3231E+18 | 38537068.4 | 2.87E+29   | cg10802132 | 0.00277723 | 13.9387518 | 2.48040688 | 78.3294079 |
| cg20063141 | 0.00090533 | 25.4081589 | 3.75965342 | 171.711183 | cg14098532 | 0.00279258 | 24.4688139 | 3.00797893 | 199.044897 |
| cg21090033 | 0.00091182 | 0.14676657 | 0.04721851 | 0.45618605 | cg17969560 | 0.00279518 | 37.0840086 | 3.47033613 | 396.27968  |
| cg11392765 | 0.00091216 | 36.4157804 | 4.35065595 | 304.806695 | cg21163128 | 0.00279571 | 12.7644154 | 2.40354844 | 67.7874008 |
| cg23631842 | 0.00091635 | 3895.64778 | 29.3560533 | 516965.664 | cg25722212 | 0.00279921 | 28659.0402 | 34.2365838 | 23990144.2 |
| cg01726823 | 0.00091944 | 3035834.98 | 445.276716 | 2.0698E+10 | cg26264580 | 0.00280319 | 869.537138 | 10.2711955 | 73613.1288 |
| cg21263269 | 0.00092421 | 0.00140383 | 2.88E-05   | 0.06841364 | cg27370013 | 0.00281395 | 72.0665781 | 4.35414225 | 1192.7933  |
| cg09758869 | 0.00092633 | 225409.827 | 153.181157 | 331696086  | cg17900356 | 0.00282411 | 21.6051072 | 2.87508753 | 162.353546 |
| cg11050527 | 0.0009294  | 72011.8399 | 95.9616834 | 54039330.1 | cg10522845 | 0.0028319  | 19.6023425 | 2.77902295 | 138.268679 |
| cg17613375 | 0.00093264 | 2863.18569 | 25.7033569 | 318940.141 | cg02727530 | 0.00283603 | 31.9540804 | 3.28578334 | 310.75185  |
| cg08069043 | 0.00093322 | 60836.9459 | 89.3782177 | 41409798.5 | cg26844213 | 0.00283868 | 22.9072586 | 2.93032204 | 179.07332  |
| cg15160780 | 0.00093467 | 9996.16899 | 42.7590723 | 2336893.41 | cg07628705 | 0.00284645 | 56.7523553 | 3.99822207 | 805.565518 |
| cg14346035 | 0.0009349  | 292.124815 | 10.1242792 | 8428.93665 | cg06148736 | 0.00284759 | 8.6568376  | 2.09711783 | 35.735158  |
| cg20122491 | 0.00093973 | 2064472.27 | 374.375872 | 1.1384E+10 | cg03110368 | 0.00284774 | 14.851658  | 2.52377334 | 87.3976056 |
| cg22712329 | 0.0009411  | 6823.73793 | 36.4836369 | 1276281.73 | cg11577646 | 0.00286043 | 28644.8491 | 33.7234192 | 24331085   |
| cg02688226 | 0.00094565 | 1040997.63 | 281.990896 | 3842946960 | cg02245020 | 0.00286549 | 7.30318664 | 1.9766053  | 26.9839078 |
| cg19786920 | 0.00094698 | 54.0974502 | 5.07699126 | 576.430798 | cg06571407 | 0.00287517 | 8.26399092 | 2.06113298 | 33.1339834 |
| cg27105224 | 0.00094735 | 83134498.4 | 1675.42661 | 4.1251E+12 | cg02399524 | 0.00288094 | 11.2224518 | 2.28810938 | 55.0425719 |
| cg11525280 | 0.00094831 | 9.33110654 | 2.48203868 | 35.0798519 | cg14998896 | 0.00288372 | 19.8895499 | 2.78274863 | 142.159514 |
| cg03539511 | 0.00095106 | 1521.1267  | 19.7164382 | 117355.194 | cg10109500 | 0.00288436 | 12.4737342 | 2.37194587 | 65.5976373 |
| cg17062109 | 0.00095227 | 7.75097521 | 2.30050561 | 26.114962  | cg11235152 | 0.00288733 | 9.67237535 | 2.17385202 | 43.0364366 |
| cg27181253 | 0.00095251 | 58.776294  | 5.2451237  | 658.64085  | cg17536086 | 0.00289086 | 9334.94689 | 22.8121685 | 3819945.19 |

|            |            |            |            |            |            |            |            |            |            |
|------------|------------|------------|------------|------------|------------|------------|------------|------------|------------|
| cg17436656 | 0.00095311 | 98.9604095 | 6.48246283 | 1510.71636 | cg05044743 | 0.00289108 | 13.3038192 | 2.42384013 | 73.021155  |
| cg00290086 | 0.00095586 | 20.8896545 | 3.44149531 | 126.798855 | cg26796815 | 0.00289625 | 4242.64625 | 17.3999817 | 1034486.55 |
| cg20239584 | 0.00095913 | 2947.53171 | 25.718888  | 337803.998 | cg12656692 | 0.00290508 | 5048173294 | 2071.07146 | 1.2305E+16 |
| cg02334620 | 0.00095991 | 3.8402E+12 | 130233.274 | 1.13E+20   | cg18129755 | 0.00290572 | 188.09322  | 5.98781328 | 5908.51078 |
| cg26483081 | 0.00096154 | 2.5039E+10 | 16806.2863 | 3.7306E+16 | cg01564135 | 0.00290754 | 14.3604733 | 2.48550143 | 82.9704584 |
| cg03773198 | 0.00096171 | 13.7867149 | 2.90408211 | 65.4504593 | cg19539664 | 0.00290803 | 0.05429164 | 0.00797634 | 0.36954085 |
| cg11382133 | 0.00096243 | 17.2543252 | 3.18093859 | 93.5924197 | cg18308285 | 0.00291114 | 37.4907453 | 3.44890299 | 407.537118 |
| cg02291466 | 0.00096473 | 7536462.28 | 621.416883 | 9.1401E+10 | cg21893185 | 0.00291717 | 12.8260456 | 2.38998824 | 68.8319063 |
| cg22837406 | 0.00096605 | 38195.7605 | 72.5799297 | 20100820.3 | cg21509551 | 0.00291768 | 523.785812 | 8.48231788 | 32343.9396 |
| cg11830546 | 0.00096721 | 365842.201 | 181.547648 | 737219772  | cg12782992 | 0.00291888 | 13.982738  | 2.46124914 | 79.4381032 |
| cg27264345 | 0.00096726 | 80.3365605 | 5.93594774 | 1087.26748 | cg24602417 | 0.002926   | 32.45741   | 3.27928509 | 321.254003 |
| cg08067677 | 0.00096804 | 6409417.37 | 580.27319  | 7.0795E+10 | cg02272993 | 0.00293067 | 30.0136005 | 3.19166501 | 282.240214 |
| cg18135855 | 0.00096822 | 4771.0079  | 31.1541348 | 730641.906 | cg15136410 | 0.00293175 | 75.9343851 | 4.38028955 | 1316.35837 |
| cg04247218 | 0.00096845 | 7.5226E+11 | 66322.535  | 8.5325E+18 | cg27093949 | 0.00293446 | 23.8389329 | 2.94963738 | 192.665961 |
| cg07218516 | 0.00097052 | 3.6774E+11 | 49455.8453 | 2.7344E+18 | cg16215203 | 0.00293548 | 5.40581712 | 1.77806997 | 16.4351567 |
| cg15838173 | 0.00097123 | 12714.7594 | 46.3132154 | 3490690.65 | cg03225210 | 0.00294627 | 5.81319539 | 1.82188045 | 18.54855   |
| cg03891929 | 0.00097197 | 1254853.3  | 298.425125 | 5276555713 | cg02916964 | 0.00295696 | 22.7613226 | 2.89875231 | 178.724415 |
| cg14770958 | 0.00097295 | 19.6407807 | 3.34736916 | 115.242821 | cg15436096 | 0.00297154 | 9.35481343 | 2.13979835 | 40.8975613 |
| cg11155414 | 0.0009743  | 460019.605 | 198.287501 | 1067228323 | cg00714713 | 0.00297235 | 118227.486 | 53.1843771 | 262816624  |
| cg09827532 | 0.00097476 | 1051233457 | 4568.09953 | 2.4191E+14 | cg13851466 | 0.00297671 | 10.269181  | 2.20816935 | 47.7572425 |
| cg05217962 | 0.00097544 | 97.82423   | 6.41760988 | 1491.14393 | cg07844977 | 0.00298143 | 7.63248555 | 1.99575453 | 29.1893792 |
| cg21201393 | 0.00098008 | 13.3908374 | 2.86278936 | 62.6362975 | cg00122310 | 0.00298339 | 139559460  | 587.300089 | 3.3163E+13 |
| cg26080673 | 0.00098334 | 2.0355E+10 | 15039.4933 | 2.755E+16  | cg23509869 | 0.00298421 | 648.443579 | 9.03357456 | 46546.2562 |
| cg12729166 | 0.00098564 | 17.1139051 | 3.15955676 | 92.6983656 | cg11007153 | 0.00298682 | 0.09450957 | 0.01991426 | 0.44852574 |
| cg18701685 | 0.00098857 | 7.28164002 | 2.23437787 | 23.7302213 | cg10723962 | 0.00298861 | 12.5347922 | 2.36145831 | 66.5355873 |
| cg11540197 | 0.00098894 | 650224.158 | 225.874319 | 1871799585 | cg18881978 | 0.00299396 | 0.08218892 | 0.01578628 | 0.42790431 |
| cg16335926 | 0.00099059 | 12040087.8 | 735.425917 | 1.9712E+11 | cg23971226 | 0.0029997  | 0.13663008 | 0.03669835 | 0.50868163 |
| cg09992116 | 0.00099087 | 17500.0526 | 52.2036636 | 5866481.76 | cg02249390 | 0.00299987 | 148.416151 | 5.46248624 | 4032.47766 |
| cg13098382 | 0.00099199 | 2987.85949 | 25.5108293 | 349941.754 | cg08216021 | 0.00300019 | 92867.248  | 48.6348886 | 177327963  |
| cg04726446 | 0.00099203 | 15.2802099 | 3.01507829 | 77.4390558 | cg00303183 | 0.00300617 | 40.6344711 | 3.51654723 | 469.540186 |

|            |            |            |            |            |            |            |            |            |            |
|------------|------------|------------|------------|------------|------------|------------|------------|------------|------------|
| cg19183867 | 0.00099385 | 0.03350902 | 0.00443767 | 0.25302804 | cg13145017 | 0.00300856 | 2.424E+10  | 3344.3794  | 1.7569E+17 |
| cg25145905 | 0.00099435 | 345413.245 | 174.216445 | 684839536  | cg23817893 | 0.00300868 | 13.6823067 | 2.42989934 | 77.0424993 |
| cg12384572 | 0.00099438 | 3379.00249 | 26.7866378 | 426244.53  | cg13860849 | 0.00301436 | 32.0031368 | 3.24067948 | 316.045067 |
| cg01966966 | 0.00099453 | 16176.8    | 50.476542  | 5184365.79 | cg20744437 | 0.00301719 | 2785.17642 | 14.7381531 | 526335.129 |
| cg11412713 | 0.00099667 | 0.02418543 | 0.0026364  | 0.2218692  | cg26402660 | 0.00301829 | 13.8106391 | 2.43621278 | 78.2910896 |
| cg07759247 | 0.00099676 | 150.595439 | 7.60296294 | 2982.91424 | cg04457423 | 0.00302288 | 1530.2635  | 12.0175163 | 194857.766 |
| cg18337826 | 0.00099756 | 5768400877 | 8875.84257 | 3.7489E+15 | cg24881993 | 0.00303133 | 704.512111 | 9.22674828 | 53793.3082 |
| cg05282559 | 0.00099891 | 17734768   | 854.183015 | 3.6821E+11 | cg10282345 | 0.00303372 | 5.7047E+15 | 217960.948 | 1.49E+26   |
| cg26181929 | 0.00100187 | 3081.1253  | 25.7257519 | 369020.627 | cg03611151 | 0.00303539 | 19.6529452 | 2.74269855 | 140.824172 |
| cg23657870 | 0.00100221 | 43928.1085 | 75.3052885 | 25624743.7 | cg05281603 | 0.00304019 | 35.9270195 | 3.36329936 | 383.775154 |
| cg18582180 | 0.00100513 | 7.6370378  | 2.27400263 | 25.6483196 | cg15044073 | 0.00304211 | 1401.07422 | 11.6267273 | 168835.9   |
| cg05003322 | 0.0010054  | 16.6843838 | 3.11831332 | 89.2689846 | cg04142824 | 0.00304431 | 5634236.74 | 193.036347 | 1.6445E+11 |
| cg03072378 | 0.00100963 | 250.526127 | 9.30747975 | 6743.32281 | cg09859398 | 0.00304574 | 9.26764101 | 2.12499015 | 40.4186203 |
| cg15269548 | 0.001011   | 2326094.86 | 372.278081 | 1.4534E+10 | cg02928644 | 0.00304905 | 10.2084191 | 2.19531295 | 47.470143  |
| cg24034966 | 0.00101355 | 29850.9205 | 64.0365283 | 13915143.1 | cg12346504 | 0.00305027 | 638.148651 | 8.8979324  | 45767.2279 |
| cg23418097 | 0.00101443 | 3613384.16 | 443.5828   | 2.9434E+10 | cg24719487 | 0.00305643 | 18.8021137 | 2.69812371 | 131.024192 |
| cg09132215 | 0.00101621 | 23.6419793 | 3.58374972 | 155.966021 | cg08655760 | 0.00306263 | 2533.09636 | 14.1570981 | 453240.991 |
| cg05006903 | 0.00101702 | 25915.9581 | 60.3776994 | 11123923   | cg20352402 | 0.00306279 | 60.970954  | 4.01465801 | 925.971084 |
| cg14000147 | 0.00101916 | 670099.011 | 223.986627 | 2004729879 | cg26830834 | 0.00306697 | 1.0642E+11 | 5343.35453 | 2.1196E+18 |
| cg03465285 | 0.00102179 | 42708.0642 | 73.6721843 | 24758038.1 | cg05060704 | 0.00306861 | 15.6005476 | 2.53110597 | 96.1544437 |
| cg07358855 | 0.00102317 | 14.9566334 | 2.97634449 | 75.1596074 | cg11142489 | 0.00307665 | 31.5970043 | 3.21104623 | 310.917566 |
| cg12796272 | 0.00102454 | 107829.017 | 106.859135 | 108807702  | cg21101743 | 0.00307733 | 16.302256  | 2.56762965 | 103.505406 |
| cg21852503 | 0.0010266  | 5362364.93 | 515.308128 | 5.5801E+10 | cg12265829 | 0.00308379 | 7.9137817  | 2.0108065  | 31.1456824 |
| cg20312228 | 0.0010278  | 19.7213509 | 3.32512671 | 116.967477 | cg18342279 | 0.00308472 | 7.15617374 | 1.94354465 | 26.3491877 |
| cg19839655 | 0.00102931 | 9.89147058 | 2.51753783 | 38.8638411 | cg15038286 | 0.00308533 | 29.766405  | 3.14487616 | 281.740463 |
| cg09638001 | 0.00103203 | 4895283.39 | 494.659278 | 4.8445E+10 | cg26643856 | 0.0030906  | 270.102874 | 6.61788746 | 11023.9957 |
| cg22323778 | 0.00103478 | 5.8779E+11 | 54757.3889 | 6.3095E+18 | cg05343713 | 0.0030914  | 69377.7113 | 43.050812  | 111804321  |
| cg15044073 | 0.00103542 | 1159.7769  | 17.1261708 | 78539.5911 | cg15897774 | 0.00309171 | 160403.875 | 57.1213264 | 450434273  |
| cg03432464 | 0.00103677 | 0.06824668 | 0.01372341 | 0.33939152 | cg03356734 | 0.00309418 | 22.3151829 | 2.85159811 | 174.627478 |
| cg01841828 | 0.00103798 | 75967.1557 | 92.0934751 | 62664686.5 | cg02938682 | 0.00309521 | 50.9529934 | 3.76746376 | 689.11281  |

|            |            |            |            |            |            |            |            |            |            |
|------------|------------|------------|------------|------------|------------|------------|------------|------------|------------|
| cg13979592 | 0.00103879 | 1.5508E+13 | 203270.163 | 1.18E+21   | cg12594581 | 0.00309621 | 20.2952879 | 2.7613677  | 149.164746 |
| cg21872782 | 0.00104075 | 23.8870226 | 3.58474638 | 159.171609 | cg01758899 | 0.0030968  | 26.9853138 | 3.03985949 | 239.552901 |
| cg26345046 | 0.00104414 | 23.90599   | 3.58398897 | 159.45818  | cg10325497 | 0.00310083 | 90.6446101 | 4.5731929  | 1796.65401 |
| cg12361311 | 0.00104419 | 3.4065E+10 | 17200.6382 | 6.7465E+16 | cg03340356 | 0.00310215 | 23.3079706 | 2.89217523 | 187.838374 |
| cg18127922 | 0.00104831 | 102.745404 | 6.43603103 | 1640.23727 | cg03680032 | 0.00310329 | 10.113978  | 2.18227371 | 46.874299  |
| cg24439070 | 0.00104984 | 409204.318 | 179.998745 | 930274122  | cg11408656 | 0.00310445 | 36468.0767 | 34.5448594 | 38498365.5 |
| cg10130314 | 0.00105492 | 634387.057 | 213.96661  | 1880886635 | cg09731694 | 0.0031073  | 11.068831  | 2.24920664 | 54.472105  |
| cg19241089 | 0.00105582 | 26.2317323 | 3.7133663  | 185.304579 | cg05819860 | 0.00311055 | 6372.97442 | 19.1600585 | 2119764.04 |
| cg04858631 | 0.00105601 | 94.2777041 | 6.20666155 | 1432.05577 | cg18611777 | 0.0031128  | 222.360461 | 6.18083129 | 7999.59948 |
| cg10733616 | 0.00105735 | 4.1555E+10 | 18339.9505 | 9.4154E+16 | cg17930034 | 0.00312551 | 16.0344461 | 2.54571036 | 100.994782 |
| cg23510258 | 0.0010589  | 12.6016315 | 2.76528698 | 57.4266314 | cg15800776 | 0.00313314 | 15957.3604 | 25.9813558 | 9800772.19 |
| cg16332610 | 0.00106019 | 6.58025439 | 2.13016183 | 20.3269757 | cg06868247 | 0.00313682 | 1278974837 | 1160.13627 | 1.41E+15   |
| cg05526364 | 0.00106029 | 11.8342238 | 2.69596336 | 51.9476101 | cg24394414 | 0.00313695 | 4596391109 | 1784.14001 | 1.1841E+16 |
| cg15878555 | 0.00106171 | 271087.415 | 151.443429 | 485253056  | cg08236022 | 0.0031378  | 13.7315965 | 2.41448629 | 78.0939378 |
| cg19248557 | 0.00106369 | 116.550581 | 6.74639266 | 2013.52615 | cg05951994 | 0.00314557 | 18.7499789 | 2.67994531 | 131.182419 |
| cg15876689 | 0.00106422 | 50097998.6 | 1227.20096 | 2.0451E+12 | cg23426747 | 0.003148   | 4.2653E+10 | 3753.31512 | 4.8472E+17 |
| cg19700658 | 0.00106631 | 1561.56657 | 19.0910143 | 127729.733 | cg10473588 | 0.00315155 | 24239919.3 | 303.763231 | 1.9343E+12 |
| cg01389761 | 0.00107073 | 22456.4395 | 55.4934578 | 9087407.7  | cg02671213 | 0.00315256 | 43.7776545 | 3.56221883 | 538.002612 |
| cg13424330 | 0.00107107 | 1651831.15 | 310.727733 | 8781147838 | cg14409958 | 0.00315638 | 7.1513824  | 1.9370398  | 26.4022816 |
| cg09311905 | 0.0010715  | 1198969.64 | 273.196145 | 5261890535 | cg23179456 | 0.00315916 | 3.9310518  | 1.58402739 | 9.75561937 |
| cg03524243 | 0.00107202 | 20916953.5 | 858.968352 | 5.0935E+11 | cg04065086 | 0.00316072 | 11.4403755 | 2.26784511 | 57.7121393 |
| cg23321951 | 0.00107239 | 4284444.81 | 454.854952 | 4.0357E+10 | cg20828120 | 0.00316165 | 2691.62172 | 14.2017462 | 510136.388 |
| cg22377027 | 0.00107243 | 240989.396 | 143.529547 | 404626716  | cg23432673 | 0.00316287 | 384613308  | 765.561026 | 1.9323E+14 |
| cg02423574 | 0.00107335 | 20193.1033 | 53.1133457 | 7677193.31 | cg01850179 | 0.00316671 | 30.7203693 | 3.15898834 | 298.747885 |
| cg23500931 | 0.00107571 | 18773761   | 820.096762 | 4.2977E+11 | cg26329618 | 0.00316908 | 29.5078711 | 3.11600422 | 279.433016 |
| cg09350274 | 0.00108043 | 10.3022062 | 2.54425859 | 41.7156703 | cg15311651 | 0.00317404 | 21.0402209 | 2.78054677 | 159.210016 |
| cg20310435 | 0.00108178 | 458023190  | 2931.71183 | 7.1557E+13 | cg12045829 | 0.00317408 | 14.9085646 | 2.47688366 | 89.7358653 |
| cg23740975 | 0.00108224 | 0.03532297 | 0.00475689 | 0.26229561 | cg25337570 | 0.00317466 | 403807.101 | 76.1799496 | 2140460522 |
| cg11913218 | 0.00108683 | 661917.21  | 213.192363 | 2055112984 | cg25637952 | 0.00317508 | 72361297.7 | 434.66098  | 1.2047E+13 |
| cg01272428 | 0.00108912 | 446.944738 | 11.4819809 | 17397.6599 | cg05417332 | 0.00319057 | 78894.1693 | 43.8632562 | 141902141  |

|            |            |            |            |            |            |            |            |            |            |
|------------|------------|------------|------------|------------|------------|------------|------------|------------|------------|
| cg11595749 | 0.00109371 | 2355.91496 | 22.2852388 | 249058.82  | cg21142512 | 0.00319151 | 371.87857  | 7.27556015 | 19007.9757 |
| cg01920373 | 0.00109557 | 6297842.53 | 521.636991 | 7.6035E+10 | cg27573806 | 0.00320076 | 4207140.19 | 165.850149 | 1.0672E+11 |
| cg00088042 | 0.00109663 | 4200.77689 | 28.0491229 | 629129.35  | cg10016610 | 0.00320638 | 31.1450913 | 3.16414268 | 306.565415 |
| cg02016764 | 0.00109795 | 11.7862119 | 2.67956916 | 51.8422115 | cg12317815 | 0.00320783 | 293.710471 | 6.70851552 | 12859.1549 |
| cg12831102 | 0.00109806 | 1034290.78 | 252.990802 | 4228443896 | cg02535060 | 0.00320877 | 8.35455373 | 2.03600174 | 34.282175  |
| cg01026744 | 0.00110429 | 39.9392851 | 4.35867859 | 365.970205 | cg11392765 | 0.0032093  | 169.418593 | 5.5784868  | 5145.24112 |
| cg10578938 | 0.00110477 | 14.0320101 | 2.87050376 | 68.5932941 | cg02441149 | 0.00322375 | 194.197795 | 5.82979782 | 6468.96939 |
| cg22330492 | 0.00110491 | 20.6973006 | 3.35225089 | 127.788243 | cg14581419 | 0.00323725 | 22.1949555 | 2.81882042 | 174.759643 |
| cg06897790 | 0.00110714 | 15439584.8 | 739.730824 | 3.2225E+11 | cg24158160 | 0.00324615 | 13.1549157 | 2.36541959 | 73.1590315 |
| cg17569080 | 0.00110744 | 53661.1823 | 77.196775  | 37301072.3 | cg04768602 | 0.00324647 | 11.7589594 | 2.27836277 | 60.6896885 |
| cg05338083 | 0.00110993 | 380.685547 | 10.7052756 | 13537.3895 | cg06994747 | 0.00325064 | 57.9314845 | 3.88017905 | 864.923204 |
| cg03317642 | 0.00111141 | 63.0186327 | 5.22189898 | 760.51798  | cg13946792 | 0.00325201 | 0.11097683 | 0.0256655  | 0.47986047 |
| cg02469457 | 0.00111281 | 117476.65  | 105.22704  | 131152252  | cg04900427 | 0.00325673 | 10.7925742 | 2.21284341 | 52.6380027 |
| cg02469095 | 0.00111455 | 8.62187021 | 2.36093512 | 31.4861029 | cg26807590 | 0.00325749 | 0.02646515 | 0.00235493 | 0.29742088 |
| cg17530152 | 0.00111658 | 23.405483  | 3.514828   | 155.858732 | cg03719155 | 0.00325946 | 31.561608  | 3.16568018 | 314.667005 |
| cg12281657 | 0.00111928 | 11.258227  | 2.62455301 | 48.2930523 | cg15056189 | 0.00326753 | 810.625597 | 9.34442445 | 70321.4909 |
| cg03180980 | 0.00111958 | 191.44065  | 8.11811773 | 4514.53451 | cg09729613 | 0.00327658 | 12.5984598 | 2.32764413 | 68.1896289 |
| cg08686462 | 0.00112148 | 157.160928 | 7.50084457 | 3292.90349 | cg14770958 | 0.00327832 | 20.3810948 | 2.73232181 | 152.027855 |
| cg02737621 | 0.00112167 | 101.846653 | 6.30996593 | 1643.86636 | cg04299389 | 0.00328952 | 9.21305945 | 2.09569036 | 40.5023882 |
| cg13932362 | 0.00112192 | 11.1296741 | 2.61179155 | 47.4270797 | cg12614442 | 0.00328975 | 198839261  | 581.988551 | 6.7934E+13 |
| cg27157482 | 0.00112336 | 32.8022483 | 4.01663678 | 267.882696 | cg21163429 | 0.00329235 | 14.8779001 | 2.45813202 | 90.0488302 |
| cg11043909 | 0.00112409 | 4547.08619 | 28.6378232 | 721981.998 | cg17191919 | 0.00330206 | 49.4756989 | 3.66519072 | 667.862865 |
| cg25392584 | 0.00112528 | 370467324  | 2585.88787 | 5.3075E+13 | cg19812495 | 0.00331019 | 371682.654 | 71.3601333 | 1935926810 |
| cg19299094 | 0.00112636 | 202.260483 | 8.284016   | 4938.34186 | cg20427865 | 0.0033146  | 17.6581566 | 2.59896171 | 119.975024 |
| cg23616741 | 0.00112696 | 24.3377072 | 3.56446209 | 166.174861 | cg07871500 | 0.00331462 | 891.287341 | 9.57921919 | 82928.7971 |
| cg12511113 | 0.0011283  | 387.883989 | 10.7304555 | 14021.2118 | cg16441026 | 0.00332242 | 3.9141E+14 | 71097.5104 | 2.15E+24   |
| cg19301273 | 0.00113113 | 72.5851033 | 5.50299369 | 957.405645 | cg00320059 | 0.00333497 | 8583107.25 | 201.140439 | 3.6626E+11 |
| cg00891278 | 0.00113346 | 19.7564549 | 3.2774748  | 119.090927 | cg01066472 | 0.00334084 | 29.309448  | 3.07035087 | 279.786832 |
| cg01098651 | 0.0011352  | 908.08294  | 15.0226694 | 54891.3516 | cg07549195 | 0.00334919 | 278208.439 | 64.1351532 | 1206825459 |
| cg23652354 | 0.00113863 | 12392787.2 | 661.529467 | 2.3216E+11 | cg19868691 | 0.00335727 | 50.1816692 | 3.66568675 | 686.965389 |

|            |            |            |            |            |            |            |            |            |            |
|------------|------------|------------|------------|------------|------------|------------|------------|------------|------------|
| cg04734210 | 0.00113868 | 50999951.6 | 1161.02278 | 2.2403E+12 | cg03531211 | 0.0033573  | 21.8494051 | 2.78200464 | 171.60162  |
| cg13861524 | 0.00113888 | 442.277952 | 11.2722768 | 17353.1746 | cg19946641 | 0.00336603 | 0.05540311 | 0.00801067 | 0.38317721 |
| cg21834204 | 0.00114335 | 51.2410467 | 4.78019147 | 549.276086 | cg21143446 | 0.00336937 | 41.7149907 | 3.44444252 | 505.202348 |
| cg16315748 | 0.00114375 | 5.8459E+11 | 47448.7492 | 7.2024E+18 | cg02541231 | 0.00336942 | 7505.4913  | 19.260386  | 2924780.4  |
| cg21893185 | 0.00114502 | 11.5783305 | 2.64629408 | 50.6586698 | cg10398590 | 0.00337287 | 48.8049731 | 3.62738315 | 656.651172 |
| cg17387989 | 0.00114902 | 19.2319438 | 3.23570043 | 114.308376 | cg23139584 | 0.00337659 | 34.3744928 | 3.22865688 | 365.974398 |
| cg26873311 | 0.0011501  | 322865256  | 2393.64286 | 4.355E+13  | cg00417297 | 0.00337865 | 15888226.3 | 243.062057 | 1.0386E+12 |
| cg04309212 | 0.00115032 | 881474.444 | 229.547652 | 3384905871 | cg01592312 | 0.0033795  | 8330931465 | 1934.42096 | 3.5879E+16 |
| cg27231335 | 0.0011522  | 47.1435746 | 4.61721983 | 481.353868 | cg19598514 | 0.00338829 | 553.831975 | 8.09705609 | 37881.6514 |
| cg23271831 | 0.00115257 | 14.1379945 | 2.86223893 | 69.8344522 | cg11870261 | 0.00339886 | 32.2907646 | 3.15732651 | 330.245693 |
| cg26592281 | 0.00115429 | 2517.6199  | 22.3836942 | 283170.862 | cg23543123 | 0.0033989  | 54.1830827 | 3.74709113 | 783.489474 |
| cg17658717 | 0.00115494 | 47.7365747 | 4.6379425  | 491.334372 | cg10328157 | 0.0034012  | 8.91288066 | 2.06201947 | 38.5250687 |
| cg07694975 | 0.00115636 | 15.6907992 | 2.98171417 | 82.5703489 | cg06208248 | 0.00340789 | 4716862.1  | 161.027984 | 1.3817E+11 |
| cg14598198 | 0.00115638 | 48932.6787 | 72.6044034 | 32978813   | cg12046254 | 0.00340956 | 18.9492873 | 2.64509282 | 135.751564 |
| cg02621694 | 0.00115704 | 24.7135451 | 3.57036828 | 171.063393 | cg22434226 | 0.00341073 | 61063.5032 | 38.2226132 | 97553545.1 |
| cg03316474 | 0.00115809 | 16528.5376 | 47.1610932 | 5792752.84 | cg18436984 | 0.00341225 | 47.1432908 | 3.57461252 | 621.742875 |
| cg21086156 | 0.0011618  | 6143846051 | 7619.16888 | 4.9542E+15 | cg04974751 | 0.00341286 | 2578960816 | 1292.06171 | 5.1476E+15 |
| cg05031240 | 0.00116539 | 115708.985 | 101.673247 | 131682321  | cg07566050 | 0.0034133  | 64089.3763 | 38.815696  | 105819258  |
| cg09484039 | 0.00116837 | 12.101081  | 2.68598733 | 54.5185604 | cg13050981 | 0.00341367 | 30.3141454 | 3.08876397 | 297.512993 |
| cg16348385 | 0.00117243 | 47.6178145 | 4.61915377 | 490.881312 | cg08066035 | 0.00341495 | 11.0146715 | 2.21011464 | 54.8944318 |
| cg18050520 | 0.0011754  | 20.9476137 | 3.33520493 | 131.566884 | cg00852573 | 0.00341892 | 16.5207762 | 2.52643965 | 108.031888 |
| cg16446585 | 0.00117883 | 0.02526317 | 0.00273708 | 0.23317857 | cg25353281 | 0.00341933 | 9.61467065 | 2.11257    | 43.7580254 |
| cg01385168 | 0.0011851  | 309344.548 | 148.465797 | 644552830  | cg10219093 | 0.00342336 | 36702.5431 | 32.2124322 | 41818533.3 |
| cg03677101 | 0.00118559 | 3.4763E+10 | 14759.7502 | 8.1874E+16 | cg23097623 | 0.00342712 | 498363.791 | 76.1787796 | 3260310412 |
| cg02916964 | 0.00118786 | 17.9524731 | 3.13246756 | 102.887351 | cg26994413 | 0.0034301  | 0.07138664 | 0.01218428 | 0.41824806 |
| cg06830702 | 0.00119184 | 21.3906413 | 3.35537135 | 136.366288 | cg08437570 | 0.00343408 | 26.5297198 | 2.95146026 | 238.467054 |
| cg07921092 | 0.00119268 | 97718.6058 | 93.7531362 | 101851803  | cg06383048 | 0.00344343 | 144095.234 | 50.361355  | 412289077  |
| cg14720706 | 0.00119336 | 20.7007037 | 3.31149209 | 129.403641 | cg03097541 | 0.00344395 | 4.0095E+14 | 65786.5393 | 2.44E+24   |
| cg02742085 | 0.0011942  | 73.3318919 | 5.45779751 | 985.299722 | cg10698419 | 0.00344489 | 18035.6393 | 25.3619822 | 12825664.9 |
| cg27572598 | 0.00119783 | 2.7044E+10 | 13190.216  | 5.5449E+16 | cg04986324 | 0.00344694 | 30.1671094 | 3.07655832 | 295.802775 |

|            |            |            |            |            |            |            |            |            |            |
|------------|------------|------------|------------|------------|------------|------------|------------|------------|------------|
| cg12872647 | 0.00119903 | 72.4493098 | 5.42674901 | 967.227798 | cg11449372 | 0.00344853 | 7505.99645 | 18.979435  | 2968475.24 |
| cg17956079 | 0.0012033  | 36010.8706 | 62.8785516 | 20623611.2 | cg16473288 | 0.00345083 | 0.07726293 | 0.01388949 | 0.42978966 |
| cg09639735 | 0.00120595 | 1358.43369 | 17.2304495 | 107097.734 | cg15203597 | 0.00346958 | 5297.58296 | 16.8558314 | 1664965.94 |
| cg00341935 | 0.00120904 | 0.0002506  | 1.65E-06   | 0.03797762 | cg04292889 | 0.00347404 | 6624968.98 | 176.336624 | 2.489E+11  |
| cg00448482 | 0.00121119 | 1487316.82 | 271.649672 | 8143250441 | cg00324161 | 0.00347508 | 14.5719843 | 2.41625866 | 87.8807923 |
| cg22628873 | 0.00121231 | 28.9416141 | 3.76969713 | 222.197432 | cg13850380 | 0.00348909 | 20.7830511 | 2.71355574 | 159.176835 |
| cg03448532 | 0.00121503 | 186.47903  | 7.85381257 | 4427.71306 | cg08084502 | 0.00349032 | 37.5555135 | 3.29642143 | 427.86295  |
| cg00016066 | 0.00122026 | 7128275.14 | 501.032995 | 1.0142E+11 | cg03965648 | 0.00349074 | 34.3128421 | 3.19983533 | 367.947414 |
| cg05372242 | 0.00122171 | 28.8808593 | 3.76134373 | 221.756929 | cg16096311 | 0.00349166 | 13.4617636 | 2.35193637 | 77.0510128 |
| cg20547295 | 0.00122199 | 4262.63113 | 26.8971748 | 675536.531 | cg17736030 | 0.00350492 | 3265.64242 | 14.2885956 | 746358.893 |
| cg04788931 | 0.00122479 | 2.7869E+15 | 1207386.43 | 6.43E+24   | cg18113295 | 0.00350701 | 9.38426746 | 2.08723903 | 42.1918498 |
| cg15676837 | 0.00122869 | 39.086045  | 4.232733   | 360.929666 | cg16403299 | 0.00351551 | 675.494551 | 8.50046476 | 53678.5812 |
| cg14226131 | 0.00122911 | 1189.08719 | 16.2311812 | 87111.8579 | cg16131859 | 0.00351649 | 111.499414 | 4.70353577 | 2643.14336 |
| cg23401796 | 0.00123009 | 0.24854898 | 0.10684482 | 0.57818986 | cg26084319 | 0.00352548 | 5296302793 | 1556.13435 | 1.8026E+16 |
| cg16285902 | 0.00123049 | 733321520  | 3080.99277 | 1.7454E+14 | cg15681626 | 0.00353462 | 11.3051909 | 2.21594624 | 57.6761927 |
| cg20352402 | 0.00123289 | 50.5642256 | 4.68082235 | 546.216181 | cg03368930 | 0.00353637 | 2679870.09 | 128.4414   | 5.5914E+10 |
| cg13904877 | 0.0012331  | 0.05395143 | 0.00918009 | 0.31707289 | cg03773198 | 0.0035398  | 12.7151988 | 2.30244827 | 70.2192885 |
| cg13934625 | 0.0012333  | 17.8732441 | 3.10897014 | 102.751986 | cg12250513 | 0.0035402  | 36.9268383 | 3.26614555 | 417.492537 |
| cg03714619 | 0.00123469 | 6.45204587 | 2.08202543 | 19.9944224 | cg03315058 | 0.00354772 | 28.7893108 | 3.00854153 | 275.490435 |
| cg23621729 | 0.00123694 | 14.0667629 | 2.82825138 | 69.9633064 | cg17526770 | 0.00355254 | 57.5714089 | 3.7744022  | 878.143596 |
| cg04339790 | 0.0012383  | 26.8104603 | 3.64405226 | 197.253149 | cg01169778 | 0.00356208 | 294.554844 | 6.43737457 | 13477.9412 |
| cg14847688 | 0.00123836 | 45.3212803 | 4.47945548 | 458.541994 | cg13312337 | 0.00356237 | 592.279315 | 8.09189323 | 43351.386  |
| cg21834860 | 0.00123878 | 567604056  | 2765.40062 | 1.165E+14  | cg14273822 | 0.0035701  | 6.64468279 | 1.85885712 | 23.7521264 |
| cg23162960 | 0.00124179 | 1.7717E+10 | 10664.4836 | 2.9433E+16 | cg00444390 | 0.00357105 | 0.0659052  | 0.01057929 | 0.41056598 |
| cg16776006 | 0.00124316 | 906389.491 | 219.3107   | 3746018362 | cg24905333 | 0.003574   | 1.56E-10   | 3.95E-17   | 0.00061739 |
| cg25234159 | 0.00124614 | 2249.68745 | 20.7424336 | 243997.1   | cg26565223 | 0.00357457 | 0.04357839 | 0.00529504 | 0.3586519  |
| cg07626637 | 0.0012487  | 5.202E+10  | 16165.7366 | 1.674E+17  | cg16976499 | 0.00358023 | 170.098213 | 5.3677041  | 5390.27516 |
| cg25393792 | 0.00124984 | 170684.729 | 113.396057 | 256916136  | cg24210813 | 0.00358549 | 29.9928387 | 3.04130338 | 295.784492 |
| cg01859118 | 0.00125084 | 209673.165 | 122.872332 | 357792803  | cg02742085 | 0.0035883  | 137.249315 | 4.99980955 | 3767.61841 |
| cg15338778 | 0.00125089 | 1175659.82 | 241.784527 | 5716561054 | cg20874811 | 0.00359214 | 898115.228 | 88.3580823 | 9128887145 |



|            |            |            |            |            |            |            |            |            |            |
|------------|------------|------------|------------|------------|------------|------------|------------|------------|------------|
| cg04722722 | 0.00125273 | 57.8306417 | 4.91758067 | 680.087088 | cg08124910 | 0.00359541 | 15.5831824 | 2.45369923 | 98.9671313 |
| cg02792140 | 0.00126077 | 3587774.05 | 372.304932 | 3.4574E+10 | cg17775899 | 0.00359543 | 46.2204989 | 3.50068323 | 610.262161 |
| cg05673638 | 0.0012631  | 112664786  | 1436.24131 | 8.8379E+12 | cg09755397 | 0.00360005 | 180.122866 | 5.45790124 | 5944.45474 |
| cg01258201 | 0.00126705 | 14.5578392 | 2.8567441  | 74.186093  | cg07554759 | 0.00360046 | 51.9233847 | 3.63491846 | 741.705188 |
| cg22690294 | 0.00127528 | 49.9468727 | 4.62518556 | 539.370813 | cg18301624 | 0.00361086 | 12186.6796 | 21.5879216 | 6879548.76 |
| cg22219278 | 0.00127688 | 1428118.24 | 256.899774 | 7938978268 | cg27105224 | 0.00361124 | 50580319.5 | 327.801728 | 7.8046E+12 |
| cg26440289 | 0.00127699 | 4.56135492 | 1.81155236 | 11.4851545 | cg01804934 | 0.00361753 | 8.74930269 | 2.02986719 | 37.7119735 |
| cg00956573 | 0.00127882 | 15344404.6 | 649.999736 | 3.6223E+11 | cg25538450 | 0.00361809 | 16054.0484 | 23.5878993 | 10926469.8 |
| cg10612237 | 0.00128219 | 24721822.7 | 781.517393 | 7.8203E+11 | cg16608407 | 0.00361933 | 26.6654737 | 2.92004667 | 243.505521 |
| cg04129227 | 0.00128627 | 254.484741 | 8.72830794 | 7419.82109 | cg09798090 | 0.00361979 | 8214.13806 | 18.9481637 | 3560876.14 |
| cg07138491 | 0.00128762 | 40.2989906 | 4.24413884 | 382.647388 | cg02695343 | 0.00362118 | 27.2078344 | 2.93894042 | 251.88202  |
| cg24548682 | 0.00128837 | 220.659885 | 8.25079734 | 5901.34297 | cg08952506 | 0.00362383 | 19.3253853 | 2.62809228 | 142.107079 |
| cg11267955 | 0.00129115 | 18.7924084 | 3.14798451 | 112.184355 | cg14876761 | 0.00363032 | 22.7472602 | 2.77054827 | 186.7637   |
| cg14379630 | 0.00129366 | 526702.255 | 172.227989 | 1610744387 | cg12014818 | 0.00364431 | 21.370058  | 2.71236917 | 168.369182 |
| cg17346177 | 0.00129376 | 5369.72551 | 28.6896839 | 1005028.57 | cg04997812 | 0.00365241 | 97.0794977 | 4.43846192 | 2123.35467 |
| cg04556868 | 0.00129731 | 64.4377283 | 5.09063341 | 815.658974 | cg20187572 | 0.00365461 | 3810.7226  | 14.6629973 | 990357.323 |
| cg13747794 | 0.00129766 | 322.864972 | 9.5533411  | 10911.5532 | cg10140906 | 0.00365473 | 47.9496695 | 3.52675693 | 651.922108 |
| cg03919114 | 0.0012994  | 12.6912215 | 2.69777831 | 59.7036095 | cg09149672 | 0.00365669 | 0.14445963 | 0.03918345 | 0.5325867  |
| cg27043726 | 0.00130091 | 9.49323115 | 2.40822037 | 37.4224215 | cg00049382 | 0.00365784 | 23.5207341 | 2.79608888 | 197.856704 |
| cg04740941 | 0.00130342 | 733.496049 | 13.1427099 | 40936.4933 | cg00472687 | 0.00366087 | 136659.698 | 46.9764251 | 397558414  |
| cg04809136 | 0.00130484 | 328740.676 | 142.402225 | 758909718  | cg20354848 | 0.00366629 | 12872.6786 | 21.748992  | 7619013.08 |
| cg10832166 | 0.00130804 | 0.05896287 | 0.01049302 | 0.33132683 | cg17956079 | 0.003668   | 111906.092 | 43.9454667 | 284966216  |
| cg26572163 | 0.0013091  | 144235.639 | 103.024337 | 201932089  | cg10147666 | 0.00367226 | 19.6641058 | 2.63546124 | 146.720829 |
| cg17963935 | 0.00131032 | 851278345  | 3046.7468  | 2.3785E+14 | cg24575275 | 0.00368127 | 64.5832244 | 3.87742866 | 1075.71105 |
| cg00713366 | 0.00131136 | 3797388.55 | 368.579793 | 3.9124E+10 | cg00246980 | 0.0036818  | 194540.793 | 52.4345428 | 721778391  |
| cg25562664 | 0.00131423 | 17.5626887 | 3.0573353  | 100.887866 | cg26831415 | 0.00368201 | 40.9008774 | 3.34207551 | 500.551759 |
| cg10938446 | 0.00131711 | 0.00428469 | 0.00015382 | 0.11934976 | cg18404009 | 0.00368612 | 2.7566E+11 | 5231.61331 | 1.4525E+19 |
| cg20508523 | 0.00132975 | 18.3558825 | 3.10465858 | 108.526723 | cg07823452 | 0.00368785 | 3.00E+22   | 20202566.4 | 4.46E+37   |
| cg03363567 | 0.00133308 | 2.6766E+10 | 11435.2397 | 6.265E+16  | cg24546463 | 0.0036893  | 34.6121221 | 3.16389408 | 378.646998 |
| cg18351191 | 0.00133331 | 0.00025736 | 1.65E-06   | 0.04009355 | cg02379560 | 0.00369034 | 15.7553167 | 2.44972839 | 101.329602 |

|            |            |            |            |            |            |            |            |            |            |
|------------|------------|------------|------------|------------|------------|------------|------------|------------|------------|
| cg16508199 | 0.00133567 | 24637621.7 | 751.456358 | 8.0778E+11 | cg20368283 | 0.00369329 | 74.1078687 | 4.0506572  | 1355.8235  |
| cg13038216 | 0.00133656 | 37.2328759 | 4.08464791 | 339.389606 | cg18607468 | 0.00370201 | 446.554293 | 7.25267587 | 27494.7813 |
| cg11229862 | 0.00133731 | 10.5387433 | 2.49962772 | 44.4326603 | cg11376305 | 0.00370286 | 4.46140457 | 1.62514891 | 12.2475735 |
| cg00515408 | 0.00133758 | 101.430034 | 6.03111087 | 1705.83034 | cg15551525 | 0.00371741 | 37617.2054 | 30.5061942 | 46385797.3 |
| cg08633134 | 0.0013397  | 65653200.3 | 1097.05445 | 3.929E+12  | cg15198000 | 0.00372121 | 32.4457538 | 3.09136778 | 340.537592 |
| cg04229059 | 0.00134179 | 380.365441 | 10.0751513 | 14359.8706 | cg10130314 | 0.00372504 | 1158121.06 | 92.5443409 | 1.4493E+10 |
| cg10454568 | 0.00134256 | 17.1978198 | 3.02236247 | 97.85888   | cg16269716 | 0.00372951 | 122.140916 | 4.74835598 | 3141.80391 |
| cg01789728 | 0.00134283 | 805.647574 | 13.4853903 | 48131.1996 | cg13784855 | 0.00373139 | 11914.3887 | 20.9545662 | 6774306.64 |
| cg13031167 | 0.00134286 | 239.940564 | 8.42061688 | 6836.96633 | cg17436656 | 0.00374125 | 93.3570646 | 4.34763442 | 2004.66292 |
| cg08438366 | 0.00134763 | 18.0839528 | 3.08013785 | 106.173608 | cg09162146 | 0.00374335 | 45.5636947 | 3.44557391 | 602.5267   |
| cg08104568 | 0.00135173 | 44.6149278 | 4.37213968 | 455.267199 | cg23599104 | 0.0037471  | 7.81640772 | 1.94624924 | 31.3917809 |
| cg07924703 | 0.00135199 | 230.644842 | 8.27550254 | 6428.25532 | cg06070445 | 0.00375112 | 15.9268793 | 2.45026597 | 103.525694 |
| cg16478733 | 0.00136182 | 153.337422 | 7.04790195 | 3336.08002 | cg12309516 | 0.00376052 | 753676.302 | 79.7582917 | 7121867281 |
| cg04117874 | 0.00136399 | 4.0403E+17 | 6760419.6  | 2.41E+28   | cg07880384 | 0.00377019 | 115.439387 | 4.64474011 | 2869.10606 |
| cg14856108 | 0.00136537 | 618957817  | 2570.5139  | 1.4904E+14 | cg06182274 | 0.00377646 | 62.6299567 | 3.80940378 | 1029.69171 |
| cg18511007 | 0.00136563 | 12.2950974 | 2.64644217 | 57.1217544 | cg18582180 | 0.00378737 | 8.06200732 | 1.96263647 | 33.1166586 |
| cg01281718 | 0.00136573 | 20.2930335 | 3.2141135  | 128.124663 | cg13478617 | 0.00378746 | 58779.584  | 34.734455  | 99470094   |
| cg07142961 | 0.00136843 | 318022.498 | 136.006148 | 743630425  | cg12272369 | 0.00378806 | 2803.32186 | 12.9949792 | 604742.29  |
| cg01191114 | 0.00136904 | 170045.039 | 106.660312 | 271097230  | cg02392575 | 0.00378893 | 1431676.6  | 97.3981243 | 2.1045E+10 |
| cg24255928 | 0.00136971 | 57.7476581 | 4.81878413 | 692.040135 | cg22608128 | 0.00379689 | 9.40954325 | 2.06227315 | 42.9329665 |
| cg14070281 | 0.00137015 | 2664.92604 | 21.2843086 | 333665.093 | cg01601628 | 0.00380204 | 221.756679 | 5.71746993 | 8601.01153 |
| cg08444060 | 0.00137405 | 3.5481E+11 | 29912.885  | 4.2087E+18 | cg18782736 | 0.00380322 | 46.6169107 | 3.45569846 | 628.855899 |
| cg05401965 | 0.00137563 | 10.0542273 | 2.44549597 | 41.3361904 | cg13078331 | 0.00380758 | 3.9384E+11 | 5514.51959 | 2.81E+19   |
| cg24678095 | 0.00137592 | 1464.66379 | 16.8480696 | 127328.536 | cg15778054 | 0.00381153 | 12.9309359 | 2.28354285 | 73.223545  |
| cg05226740 | 0.0013818  | 18.4589907 | 3.09234788 | 110.186289 | cg01518459 | 0.00381803 | 0.00113792 | 1.15E-05   | 0.11237692 |
| cg27579745 | 0.00138356 | 231.836223 | 8.23483626 | 6526.90988 | cg23907982 | 0.00381942 | 18.2992877 | 2.5530903  | 131.160237 |
| cg16585234 | 0.00138569 | 16.8705957 | 2.98515211 | 95.3442194 | cg08799865 | 0.00382214 | 1.1402E+13 | 16198.9402 | 8.03E+21   |
| cg27458485 | 0.00138777 | 23.3549244 | 3.38472524 | 161.151188 | cg13039082 | 0.00383496 | 23.9888194 | 2.78333246 | 206.753402 |
| cg01038149 | 0.00138878 | 11.1395463 | 2.54135878 | 48.8280096 | cg03677101 | 0.0038351  | 1.151E+11  | 3658.11037 | 3.6215E+18 |
| cg12594581 | 0.00139358 | 15.2436863 | 2.86779766 | 81.027325  | cg05652493 | 0.00383825 | 26738283.5 | 246.692786 | 2.8981E+12 |

|            |            |            |            |            |            |            |            |            |            |
|------------|------------|------------|------------|------------|------------|------------|------------|------------|------------|
| cg21368609 | 0.00139625 | 28.8631255 | 3.66960173 | 227.021916 | cg08881680 | 0.00384545 | 6.81286423 | 1.85475488 | 25.0249343 |
| cg27018309 | 0.00139776 | 0.05545322 | 0.00940631 | 0.32691442 | cg23725690 | 0.00384891 | 985.996539 | 9.197413   | 105702.46  |
| cg20743280 | 0.00139846 | 11.1472298 | 2.5396805  | 48.9277024 | cg13424330 | 0.00385014 | 1663429.45 | 100.522548 | 2.7526E+10 |
| cg16978004 | 0.00140196 | 0.03506557 | 0.00448778 | 0.27398698 | cg01511567 | 0.00385152 | 38.6198964 | 3.2410211  | 460.193362 |
| cg27294268 | 0.00140374 | 31.320152  | 3.78349488 | 259.271376 | cg16017089 | 0.00385215 | 5.35977737 | 1.71653133 | 16.7356185 |
| cg16408670 | 0.00140724 | 0.04245733 | 0.00610646 | 0.29519964 | cg04788444 | 0.00385631 | 49231166.7 | 298.455664 | 8.1208E+12 |
| cg12220843 | 0.0014078  | 561494.039 | 166.061558 | 1898546296 | cg15338778 | 0.00386456 | 5421417.64 | 146.403821 | 2.0076E+11 |
| cg13784855 | 0.00140941 | 2544.03054 | 20.6500012 | 313418.45  | cg12045833 | 0.00386925 | 211.983126 | 5.59606387 | 8030.08092 |
| cg00314660 | 0.00141184 | 99.8385184 | 5.91242569 | 1685.89515 | cg26497348 | 0.00387514 | 19.1001841 | 2.5804573  | 141.376891 |
| cg21325316 | 0.00141602 | 118263.056 | 90.6525172 | 154283088  | cg19408398 | 0.00387602 | 0.03872614 | 0.00426352 | 0.35175482 |
| cg01597066 | 0.00141663 | 5.42747798 | 1.92056959 | 15.3379067 | cg23606286 | 0.00388174 | 1.6142E+10 | 1902.51293 | 1.3696E+17 |
| cg10779674 | 0.00141664 | 272808.223 | 125.116658 | 594839468  | cg07498606 | 0.00388312 | 33383.2792 | 28.3839408 | 39263164.3 |
| cg22219587 | 0.00141817 | 8067.91528 | 32.144784  | 2024939.94 | cg06561166 | 0.00388446 | 11690.5612 | 20.2576187 | 6746559.01 |
| cg05445326 | 0.00142234 | 0.10692358 | 0.02707338 | 0.42228387 | cg21714061 | 0.0038895  | 45.3584465 | 3.40376543 | 604.444903 |
| cg16127594 | 0.0014233  | 15.4636077 | 2.87449378 | 83.1879213 | cg17952262 | 0.00389359 | 13.119719  | 2.28498364 | 75.3296537 |
| cg20375554 | 0.00142389 | 248.078351 | 8.37959984 | 7344.36842 | cg10324701 | 0.00389388 | 0.04524427 | 0.00552992 | 0.37017588 |
| cg06324635 | 0.0014258  | 2273.34652 | 19.6742111 | 262684.2   | cg07602200 | 0.00389761 | 35.4021673 | 3.1416727  | 398.931897 |
| cg25149391 | 0.0014266  | 91.7771744 | 5.70842739 | 1475.54645 | cg11934386 | 0.00390175 | 2.0249E+11 | 4245.21652 | 9.6585E+18 |
| cg12007596 | 0.00142679 | 10.5495551 | 2.47963425 | 44.8828745 | cg26883434 | 0.00390386 | 137.670817 | 4.85519913 | 3903.70269 |
| cg10006582 | 0.00142694 | 27195.5152 | 51.1885511 | 14448466.1 | cg20631254 | 0.00391338 | 4.0309E+10 | 2515.53213 | 6.4592E+17 |
| cg24754334 | 0.00142724 | 22085276.7 | 676.904274 | 7.2057E+11 | cg16978004 | 0.0039158  | 0.03006164 | 0.0027796  | 0.32511976 |
| cg17892169 | 0.00143078 | 23.2922747 | 3.36322058 | 161.312661 | cg03507534 | 0.00391659 | 25.6904557 | 2.83112319 | 233.122853 |
| cg05299836 | 0.00143326 | 115.79103  | 6.23572183 | 2150.12199 | cg26818820 | 0.00392722 | 27.5045209 | 2.8918051  | 261.60085  |
| cg04445214 | 0.00143381 | 57717.3862 | 68.2119652 | 48837424.1 | cg17166812 | 0.00392879 | 336.005872 | 6.44671699 | 17512.7814 |
| cg01963221 | 0.0014341  | 9490165.19 | 486.722549 | 1.8504E+11 | cg02700626 | 0.00393515 | 9.39433341 | 2.04903678 | 43.0707252 |
| cg08196842 | 0.00144477 | 19.2284087 | 3.1187197  | 118.552399 | cg12411312 | 0.00394113 | 164027.515 | 46.7124497 | 575971199  |
| cg26342670 | 0.00144545 | 1456.33904 | 16.4790101 | 128704.539 | cg20918957 | 0.00394528 | 9.21399997 | 2.03549423 | 41.7086888 |
| cg19969694 | 0.00145156 | 10.114517  | 2.43429296 | 42.0259421 | cg13794888 | 0.00395115 | 60750208.5 | 309.207038 | 1.1936E+13 |
| cg06895295 | 0.00145157 | 46.975685  | 4.39326156 | 502.295379 | cg15780361 | 0.00395311 | 11.2817456 | 2.17098056 | 58.6268644 |
| cg26227186 | 0.00145581 | 79.7314495 | 5.38036228 | 1181.53829 | cg17925360 | 0.00395682 | 2.05E+20   | 3138004.94 | 1.35E+34   |

|            |            |            |            |            |            |            |            |            |            |
|------------|------------|------------|------------|------------|------------|------------|------------|------------|------------|
| cg05950711 | 0.00145597 | 31.4353316 | 3.7623581  | 262.649128 | cg11300971 | 0.00395782 | 160.260487 | 5.07143024 | 5064.33543 |
| cg15557486 | 0.00145846 | 2661664.96 | 294.159169 | 2.4084E+10 | cg10502118 | 0.00396447 | 12.3323649 | 2.23251095 | 68.1238423 |
| cg26045220 | 0.00145903 | 19.407355  | 3.12475626 | 120.535938 | cg04394254 | 0.00397071 | 116.626048 | 4.57600351 | 2972.383   |
| cg23168192 | 0.00145964 | 14.3744427 | 2.78420282 | 74.2132005 | cg17697381 | 0.00397669 | 527118.144 | 67.2837383 | 4129579363 |
| cg13475699 | 0.00146237 | 3137001.29 | 312.626724 | 3.1478E+10 | cg05413277 | 0.00397915 | 21.1268402 | 2.64952484 | 168.461669 |
| cg04065086 | 0.0014638  | 10.2725692 | 2.44616562 | 43.1392208 | cg00150500 | 0.00397922 | 2910148.81 | 116.049612 | 7.2977E+10 |
| cg24105407 | 0.00146496 | 28.3827252 | 3.61334851 | 222.945306 | cg07811634 | 0.00398586 | 1.217E+12  | 7222.21805 | 2.05E+20   |
| cg00557469 | 0.00146521 | 22791.1559 | 47.1143227 | 11025029.2 | cg12296552 | 0.00398642 | 0.08641798 | 0.01632018 | 0.45759716 |
| cg00099023 | 0.0014727  | 10437218.3 | 492.897642 | 2.2101E+11 | cg05338083 | 0.00398753 | 453.656387 | 7.04975579 | 29193.0847 |
| cg26181939 | 0.00147452 | 18.2870213 | 3.04893186 | 109.682723 | cg09479758 | 0.00398943 | 135.234503 | 4.78944505 | 3818.47385 |
| cg26399396 | 0.0014769  | 599.903142 | 11.6251099 | 30957.4518 | cg06830702 | 0.0039911  | 48.2250015 | 3.4457294  | 674.937146 |
| cg03627290 | 0.0014794  | 19.7183147 | 3.13661182 | 123.959214 | cg12804865 | 0.00399846 | 82410741.9 | 335.430619 | 2.0247E+13 |
| cg04346127 | 0.00148005 | 863545.42  | 188.738777 | 3951020045 | cg00154846 | 0.00400958 | 43.7544937 | 3.33602724 | 573.872927 |
| cg22628146 | 0.0014803  | 1040.35917 | 14.34506   | 75450.8667 | cg23481605 | 0.00401106 | 44.89839   | 3.36323956 | 599.38205  |
| cg27494615 | 0.00148474 | 12462.2943 | 37.106219  | 4185518.85 | cg14113931 | 0.00401876 | 0.07941893 | 0.0141388  | 0.44610353 |
| cg11845111 | 0.00148531 | 108.305235 | 6.02060724 | 1948.31245 | cg18361024 | 0.00402429 | 5027.80155 | 15.1059537 | 1673432.15 |
| cg23637705 | 0.00148614 | 2.3812E+17 | 4549032.84 | 1.25E+28   | cg18732172 | 0.0040244  | 10.9667288 | 2.144545   | 56.0814252 |
| cg10715223 | 0.00148854 | 6.0110328  | 1.98784998 | 18.1766812 | cg27529930 | 0.00402537 | 9.05613754 | 2.01759579 | 40.6491864 |
| cg15689069 | 0.00149053 | 33230.8006 | 53.9110129 | 20483497.7 | cg24368491 | 0.00402611 | 0.04220718 | 0.00488244 | 0.36486808 |
| cg10628982 | 0.0014925  | 2.6544E+14 | 333485.44  | 2.11E+23   | cg07569219 | 0.00403521 | 537699.613 | 66.7445794 | 4331750634 |
| cg13690989 | 0.0014939  | 308.218502 | 8.97174058 | 10588.6527 | cg26657230 | 0.00403716 | 11632.0536 | 19.6890486 | 6872077.68 |
| cg08949329 | 0.00150141 | 14.4748554 | 2.77984545 | 75.3716146 | cg01052428 | 0.00404482 | 768589.227 | 74.6043938 | 7918158297 |
| cg09321817 | 0.00150363 | 10.7495622 | 2.48026015 | 46.5891001 | cg16575322 | 0.00405207 | 14.5186829 | 2.34183768 | 90.0114273 |
| cg06680214 | 0.00151047 | 2563602.88 | 281.631585 | 2.3336E+10 | cg11449134 | 0.0040529  | 38.3628247 | 3.18967535 | 461.3969   |
| cg20701182 | 0.00151179 | 28830.4279 | 50.6392326 | 16414023.9 | cg09948076 | 0.00405585 | 26.6959348 | 2.84176636 | 250.785196 |
| cg10867327 | 0.00151233 | 3985.9967  | 23.7682218 | 668462.702 | cg15876689 | 0.00406076 | 17900673.5 | 202.137786 | 1.5852E+12 |
| cg11622362 | 0.00151424 | 4106.53614 | 24.0261662 | 701886.391 | cg21654383 | 0.00406674 | 54.5656208 | 3.56422634 | 835.358557 |
| cg10453019 | 0.00151801 | 18.947726  | 3.07585577 | 116.720791 | cg09278980 | 0.00407185 | 9.9113531  | 2.07234199 | 47.4028519 |
| cg19641839 | 0.00151939 | 0.02484881 | 0.00253189 | 0.24387414 | cg11406274 | 0.00407509 | 42.6826845 | 3.29470885 | 552.950696 |
| cg10348922 | 0.00152096 | 14.5610195 | 2.78071309 | 76.247812  | cg08632164 | 0.0040774  | 4.85069427 | 1.65121191 | 14.2496761 |

|            |            |            |            |            |            |            |            |            |            |
|------------|------------|------------|------------|------------|------------|------------|------------|------------|------------|
| cg01130898 | 0.0015216  | 74.3519596 | 5.18196392 | 1066.81829 | cg01029638 | 0.00408043 | 10.9437815 | 2.13780861 | 56.0229544 |
| cg26542888 | 0.00152331 | 121.944448 | 6.25752308 | 2376.41126 | cg03744440 | 0.00408391 | 8.95785926 | 2.00583063 | 40.0049942 |
| cg19584674 | 0.00152361 | 153.582687 | 6.83318105 | 3451.92696 | cg24683514 | 0.00409078 | 821782.776 | 75.3351699 | 8964298247 |
| cg27200466 | 0.00152397 | 19.7310786 | 3.12175159 | 124.710583 | cg04650403 | 0.00410488 | 11640.9635 | 19.4650119 | 6961826.24 |
| cg07528363 | 0.0015258  | 17.675235  | 2.99276492 | 104.389733 | cg00431235 | 0.00411074 | 8.0263E+11 | 5935.24447 | 1.09E+20   |
| cg26757053 | 0.00152744 | 12135.2667 | 36.1809444 | 4070228.13 | cg12876594 | 0.00411419 | 19.9927813 | 2.58382214 | 154.697684 |
| cg10082589 | 0.00152803 | 9.59994335 | 2.37035681 | 38.8797636 | cg03969906 | 0.00412722 | 44089.8494 | 29.5624963 | 65756112.2 |
| cg14022778 | 0.00153228 | 9.28950573 | 2.33998817 | 36.878356  | cg22112476 | 0.0041304  | 90131.4076 | 37.0504361 | 219259785  |
| cg02978959 | 0.00153388 | 35527.6068 | 54.377175  | 23212144.5 | cg00813378 | 0.00413574 | 7.87965835 | 1.92203503 | 32.3037898 |
| cg26212303 | 0.00153532 | 4178003136 | 4661.95251 | 3.7443E+15 | cg21531300 | 0.0041559  | 14.6187359 | 2.33500666 | 91.5232676 |
| cg01184539 | 0.00153966 | 124.294901 | 6.28491326 | 2458.14411 | cg19967582 | 0.00416114 | 7455357.51 | 148.623547 | 3.7398E+11 |
| cg13995101 | 0.00154313 | 1564.55508 | 16.4865954 | 148474.112 | cg04543413 | 0.00416193 | 8.22965294 | 1.94669979 | 34.7907716 |
| cg07450214 | 0.00154702 | 584.177589 | 11.3166068 | 30155.9877 | cg13646565 | 0.00416435 | 724114.73  | 71.0703022 | 7377795315 |
| cg04809274 | 0.00155253 | 25.2572633 | 3.41864613 | 186.60292  | cg20495019 | 0.00417148 | 132648443  | 367.880905 | 4.783E+13  |
| cg17721173 | 0.00155402 | 192282.542 | 102.607514 | 360330100  | cg21214613 | 0.00417832 | 57.2131845 | 3.58855968 | 912.162197 |
| cg19151808 | 0.00155406 | 21.7140639 | 3.22693343 | 146.11413  | cg23973885 | 0.00418194 | 58.0863227 | 3.6048041  | 935.978986 |
| cg17775899 | 0.00155455 | 28.7203624 | 3.58913419 | 229.821224 | cg01035068 | 0.00418327 | 416.295353 | 6.71162859 | 25821.128  |
| cg26608667 | 0.00155821 | 0.0669662  | 0.01254398 | 0.35749986 | cg01565438 | 0.00418499 | 16.3851675 | 2.41718531 | 111.068735 |
| cg02535060 | 0.00156134 | 6.90845248 | 2.08574549 | 22.8823296 | cg21116657 | 0.00418889 | 1835063.24 | 94.7364463 | 3.5546E+10 |
| cg24217704 | 0.00156429 | 172.974111 | 7.09548294 | 4216.7733  | cg01819512 | 0.00419139 | 43.2388926 | 3.28195043 | 569.661813 |
| cg23437162 | 0.00156613 | 102.789711 | 5.81968919 | 1815.51356 | cg16317734 | 0.00419543 | 82.1236466 | 4.01689931 | 1678.97993 |
| cg11841529 | 0.00156926 | 8.23934043 | 2.22893959 | 30.456963  | cg26724572 | 0.00419849 | 0.00451042 | 0.00011175 | 0.18204828 |
| cg10830649 | 0.00156989 | 369.532882 | 9.45833304 | 14437.486  | cg16849024 | 0.00419885 | 13.9053554 | 2.29366265 | 84.3013725 |
| cg09552892 | 0.00157029 | 16.9390091 | 2.93096337 | 97.89615   | cg21568286 | 0.00420368 | 2001344444 | 856.211557 | 4.678E+15  |
| cg02362385 | 0.00157259 | 83834.9324 | 74.2374547 | 94673179.7 | cg13652991 | 0.00420433 | 42.5813354 | 3.26326163 | 555.631246 |
| cg10282491 | 0.00157807 | 22.7720195 | 3.27691779 | 158.247752 | cg11352083 | 0.00421034 | 22.8453749 | 2.6806971  | 194.692326 |
| cg22416703 | 0.0015825  | 1.7365E+12 | 44257.3747 | 6.8132E+19 | cg03583016 | 0.00421507 | 12.6468883 | 2.22440833 | 71.9039671 |
| cg07793638 | 0.00159041 | 25.6703534 | 3.42448755 | 192.427928 | cg01407244 | 0.00421509 | 24.4296136 | 2.73719684 | 218.035479 |
| cg23195373 | 0.00159049 | 48.0376638 | 4.34327201 | 531.308457 | cg13442432 | 0.004217   | 10.593067  | 2.10343751 | 53.3474692 |
| cg08886727 | 0.001591   | 10.3268179 | 2.42423416 | 43.9904569 | cg24703125 | 0.00422245 | 113469106  | 344.248371 | 3.7401E+13 |

|            |            |            |            |            |            |            |            |            |            |
|------------|------------|------------|------------|------------|------------|------------|------------|------------|------------|
| cg19838156 | 0.0015935  | 147.676268 | 6.64622256 | 3281.30451 | cg20252067 | 0.00422261 | 3444.65765 | 13.0019711 | 912605.197 |
| cg04465834 | 0.00159435 | 273.580845 | 8.39531826 | 8915.26404 | cg07201835 | 0.0042338  | 0.06504728 | 0.00999973 | 0.42312637 |
| cg22995449 | 0.00159621 | 32.5189291 | 3.74313537 | 282.512024 | cg05909880 | 0.00423695 | 2.0218E+13 | 15387.1679 | 2.66E+22   |
| cg19921353 | 0.00159817 | 372.246005 | 9.42745542 | 14698.2491 | cg03381111 | 0.00424013 | 0.03737192 | 0.00392837 | 0.35553168 |
| cg22273939 | 0.00160405 | 35.2013621 | 3.85345524 | 321.564886 | cg22776392 | 0.00424581 | 11.5239018 | 2.15726887 | 61.5594626 |
| cg03892045 | 0.00160591 | 9.05184726 | 2.30333163 | 35.5727928 | cg10481660 | 0.00424996 | 8.01640569 | 1.92424775 | 33.3963026 |
| cg12727795 | 0.0016074  | 21.2290801 | 3.18048967 | 141.699515 | cg20215212 | 0.00425201 | 143.911829 | 4.77029638 | 4341.57814 |
| cg07575193 | 0.00160784 | 15.490552  | 2.82258048 | 85.0134136 | cg13519902 | 0.0042533  | 33.9688548 | 3.02945721 | 380.887734 |
| cg26139475 | 0.00161028 | 2.8372E+10 | 9063.90649 | 8.8809E+16 | cg17649836 | 0.00425398 | 918620.092 | 74.9393196 | 1.1261E+10 |
| cg27106909 | 0.00161965 | 19.1496482 | 3.05477803 | 120.04441  | cg11845111 | 0.0042618  | 99.1966745 | 4.24019766 | 2320.64187 |
| cg25619837 | 0.00162162 | 117610.283 | 82.7087816 | 167239541  | cg16194715 | 0.00426252 | 41.0896863 | 3.21428411 | 525.268541 |
| cg20118643 | 0.00162284 | 4534.13587 | 24.1358406 | 851778.416 | cg14898768 | 0.00427104 | 0.03348383 | 0.00325828 | 0.34409824 |
| cg04357685 | 0.00162401 | 3.04E-09   | 1.54E-14   | 0.00060248 | cg04807004 | 0.0042756  | 114.523283 | 4.43084949 | 2960.06043 |
| cg23302845 | 0.0016263  | 185247129  | 1334.56723 | 2.5714E+13 | cg10173186 | 0.00428031 | 19.1283585 | 2.52543177 | 144.883779 |
| cg09118164 | 0.00162763 | 78811.6248 | 70.9182167 | 87583592.7 | cg05257472 | 0.00428087 | 23.8219381 | 2.70543859 | 209.757019 |
| cg25060020 | 0.00162828 | 29767.1792 | 49.0716686 | 18056956   | cg07759247 | 0.00429246 | 217.039023 | 5.40710551 | 8711.85842 |
| cg13168437 | 0.00163527 | 14336.3919 | 37.143446  | 5533469.7  | cg03135127 | 0.00429626 | 5940.08365 | 15.2606295 | 2312132.25 |
| cg04700925 | 0.00163805 | 244570.134 | 108.308845 | 552259150  | cg15049402 | 0.00430488 | 23.7014555 | 2.69748924 | 208.252542 |
| cg15058894 | 0.00163992 | 17.6856833 | 2.95815099 | 105.736115 | cg01270593 | 0.00430876 | 28.51738   | 2.85787102 | 284.561813 |
| cg02404489 | 0.00164017 | 150824616  | 1223.44757 | 1.8593E+13 | cg05816193 | 0.00431176 | 16.2724346 | 2.39670289 | 110.481832 |
| cg19056004 | 0.00164217 | 19.3495254 | 3.05957052 | 122.371467 | cg03887520 | 0.0043137  | 13.7121065 | 2.27131668 | 82.7809991 |
| cg15780361 | 0.00164324 | 10.292483  | 2.41069859 | 43.9437794 | cg10130900 | 0.004315   | 16.9207994 | 2.42583209 | 118.026904 |
| cg19297231 | 0.00164382 | 71609.1453 | 67.9599041 | 75454339.8 | cg03400491 | 0.00431743 | 2202464.49 | 97.0379172 | 4.9989E+10 |
| cg12940439 | 0.00164761 | 7.17793628 | 2.10347844 | 24.49408   | cg18353196 | 0.0043216  | 35.5544137 | 3.05991441 | 413.121467 |
| cg09142117 | 0.00164993 | 3792577.3  | 303.01251  | 4.7469E+10 | cg21883802 | 0.00432344 | 33.6188105 | 3.00639241 | 375.940419 |
| cg24688655 | 0.00165442 | 13.6018068 | 2.67543649 | 69.1510144 | cg04021672 | 0.00432356 | 46.1642912 | 3.320245   | 641.862809 |
| cg04380635 | 0.00165747 | 693023960  | 2149.04034 | 2.2349E+14 | cg07707586 | 0.0043292  | 25.9824513 | 2.77242489 | 243.500835 |
| cg08021273 | 0.00165881 | 4536.44404 | 23.8843643 | 861623.288 | cg02033116 | 0.00432925 | 3515032.2  | 111.98763  | 1.1033E+11 |
| cg09020665 | 0.00165908 | 90.4757974 | 5.4619     | 1498.72204 | cg02469095 | 0.00432997 | 8.5528432  | 1.95785568 | 37.36288   |
| cg07570421 | 0.00166285 | 9526.33029 | 31.5488718 | 2876520.26 | cg02993937 | 0.00433379 | 1.8062E+10 | 1621.82071 | 2.0114E+17 |

|            |            |            |            |            |            |            |            |            |            |
|------------|------------|------------|------------|------------|------------|------------|------------|------------|------------|
| cg23130076 | 0.0016648  | 274.994228 | 8.2947435  | 9116.83713 | cg13666340 | 0.00433538 | 1323.74728 | 9.48260009 | 184791.813 |
| cg03177847 | 0.00166684 | 13.6841833 | 2.67849519 | 69.9112224 | cg01441105 | 0.00433744 | 19776355.4 | 191.851883 | 2.0386E+12 |
| cg07517893 | 0.00167468 | 4.64446555 | 1.78230039 | 12.1029318 | cg13843603 | 0.00434338 | 1.7683E+12 | 6776.0452  | 4.61E+20   |
| cg00530805 | 0.00167525 | 12.0981877 | 2.55521365 | 57.281373  | cg05377387 | 0.00435036 | 56.6361787 | 3.53300489 | 907.911775 |
| cg16734497 | 0.00167706 | 300306.5   | 115.043556 | 783911738  | cg19301273 | 0.00435138 | 84.6632677 | 4.00592301 | 1789.31769 |
| cg05136476 | 0.00167754 | 293.974736 | 8.4845296  | 10185.7321 | cg21379008 | 0.00436322 | 137487588  | 348.954638 | 5.417E+13  |
| cg02322879 | 0.00167946 | 0.10752323 | 0.02674907 | 0.43221104 | cg21998208 | 0.00436523 | 18.5796243 | 2.49149986 | 138.552061 |
| cg07065570 | 0.00168189 | 384040.452 | 125.925572 | 1171224130 | cg06835221 | 0.00437201 | 3614146.04 | 111.689376 | 1.1695E+11 |
| cg04452959 | 0.00168235 | 11.4777032 | 2.50358494 | 52.6196135 | cg00619097 | 0.0043766  | 1095626523 | 664.177389 | 1.8073E+15 |
| cg00569934 | 0.00168324 | 6093.99844 | 26.4977977 | 1401505.8  | cg13362105 | 0.00438359 | 1.9387E+10 | 1624.09832 | 2.3141E+17 |
| cg13520531 | 0.00168497 | 36.535227  | 3.86831835 | 345.065399 | cg12455762 | 0.00438375 | 17.9047997 | 2.46056147 | 130.28809  |
| cg04292889 | 0.0016872  | 418713.964 | 129.778111 | 1350931857 | cg06974871 | 0.00438877 | 8.35431684 | 1.93925233 | 35.9904737 |
| cg10666406 | 0.00168837 | 1941148.51 | 230.85589  | 1.6322E+10 | cg11932205 | 0.00439194 | 0.082316   | 0.01476641 | 0.45887406 |
| cg06301550 | 0.00169203 | 8.01408862 | 2.18572733 | 29.3840936 | cg01861031 | 0.00439686 | 308574971  | 444.080223 | 2.1442E+14 |
| cg02703870 | 0.00169511 | 11.9727981 | 2.54088648 | 56.4164887 | cg20276962 | 0.00440167 | 77.5625292 | 3.88276667 | 1549.39672 |
| cg00420348 | 0.00169693 | 6.54254054 | 2.02467158 | 21.1416198 | cg25485294 | 0.00440305 | 11.2520626 | 2.12676628 | 59.5311834 |
| cg26831415 | 0.0016978  | 33.6374816 | 3.7441646  | 302.198297 | cg01667978 | 0.00440709 | 8568.51261 | 16.8189428 | 4365280.82 |
| cg21538450 | 0.00170047 | 17.1032167 | 2.90358231 | 100.744526 | cg05894734 | 0.00441075 | 24.6735838 | 2.71543156 | 224.194836 |
| cg01716223 | 0.00170047 | 3752.18161 | 21.9731368 | 640730.863 | cg04917391 | 0.00441222 | 16.1218718 | 2.37802495 | 109.29858  |
| cg11299660 | 0.00170356 | 1016869.65 | 179.750444 | 5752552620 | cg16391745 | 0.00442356 | 16513255.3 | 176.833256 | 1.5421E+12 |
| cg26942275 | 0.00170489 | 20.8105078 | 3.12408323 | 138.625383 | cg23969515 | 0.00442436 | 4936696.92 | 121.388886 | 2.0077E+11 |
| cg22339486 | 0.00170605 | 51600.2313 | 58.6634649 | 45387429.4 | cg00254079 | 0.00442448 | 56696278.7 | 259.572601 | 1.2384E+13 |
| cg10385303 | 0.00170701 | 116.822202 | 5.96688099 | 2287.19607 | cg00716257 | 0.00443042 | 26.2211303 | 2.76429965 | 248.724003 |
| cg01420215 | 0.00170722 | 21588.867  | 42.286021  | 11022062.8 | cg20261082 | 0.00443603 | 1441740.77 | 82.5054058 | 2.5194E+10 |
| cg15656257 | 0.00170778 | 77.1188642 | 5.10532606 | 1164.92446 | cg04825775 | 0.00443775 | 167166833  | 361.89407  | 7.7218E+13 |
| cg25533556 | 0.00170859 | 3.3162E+12 | 49789.5359 | 2.21E+20   | cg04413872 | 0.00444235 | 278157343  | 423.363278 | 1.8275E+14 |
| cg05817661 | 0.00170924 | 2.4843E+11 | 18822.388  | 3.2788E+18 | cg17252669 | 0.00444395 | 51846257.6 | 250.93145  | 1.0712E+13 |
| cg16552437 | 0.00171101 | 1475.43137 | 15.4370102 | 141018.094 | cg08617683 | 0.00444625 | 14.4620388 | 2.29523336 | 91.123878  |
| cg04465286 | 0.00171553 | 1811745.43 | 221.948867 | 1.4789E+10 | cg20333292 | 0.00445383 | 20.6360592 | 2.56254163 | 166.181471 |
| cg05635953 | 0.00171618 | 1017322692 | 2381.38965 | 4.346E+14  | cg22149588 | 0.00445577 | 70895.2165 | 32.1900377 | 156139355  |

|            |            |            |            |            |            |            |            |            |            |
|------------|------------|------------|------------|------------|------------|------------|------------|------------|------------|
| cg11705470 | 0.00171666 | 127636.237 | 82.0554881 | 198536495  | cg23755113 | 0.004462   | 695164.216 | 65.3538397 | 7394413081 |
| cg15136410 | 0.0017215  | 56.2114168 | 4.52563102 | 698.184046 | cg15058894 | 0.00446382 | 19.336085  | 2.5099434  | 148.961201 |
| cg06172138 | 0.0017218  | 3.1778E+11 | 20410.8243 | 4.9475E+18 | cg07575193 | 0.00446518 | 18.9933568 | 2.49586295 | 144.538226 |
| cg01025836 | 0.00172224 | 7.72659039 | 2.15137822 | 27.749746  | cg14896306 | 0.00447711 | 1204637887 | 659.565889 | 2.2002E+15 |
| cg24812936 | 0.00172313 | 33393983.8 | 658.850291 | 1.6926E+12 | cg18511007 | 0.00448216 | 12.4085326 | 2.18505866 | 70.465697  |
| cg11057378 | 0.00172382 | 287744.716 | 110.948922 | 746262511  | cg19967492 | 0.00449157 | 23.2620003 | 2.65430422 | 203.86535  |
| cg19865616 | 0.00172502 | 1750.74916 | 16.4015738 | 186879.787 | cg22308501 | 0.00449542 | 902.347645 | 8.25272034 | 98662.1671 |
| cg13440692 | 0.00172577 | 31.1320225 | 3.62497719 | 267.367979 | cg05125578 | 0.00449961 | 14.2909669 | 2.28115298 | 89.5300478 |
| cg06191571 | 0.0017328  | 0.00857748 | 0.00043684 | 0.16842177 | cg03919114 | 0.00450421 | 14.7572405 | 2.30348431 | 94.5420586 |
| cg26247263 | 0.00173666 | 13885.8475 | 35.4928824 | 5432547.25 | cg21834860 | 0.00451144 | 457367226  | 482.568658 | 4.3348E+14 |
| cg04427651 | 0.00173892 | 32.1622136 | 3.66379018 | 282.332758 | cg22286382 | 0.00451803 | 12.8764242 | 2.20682069 | 75.1317494 |
| cg26906273 | 0.00173933 | 12.8610931 | 2.60009497 | 63.6160286 | cg26169020 | 0.00452172 | 1.2202E+10 | 1329.56378 | 1.1199E+17 |
| cg05356496 | 0.00174043 | 18.3520108 | 2.96966028 | 113.4124   | cg09820792 | 0.00452604 | 32.5990317 | 2.94115562 | 361.319496 |
| cg19769982 | 0.00174123 | 6.45877566 | 2.00923849 | 20.7619868 | cg06926254 | 0.00452635 | 674730.934 | 63.7944941 | 7136381271 |
| cg10851037 | 0.00174297 | 1415287.95 | 199.674392 | 1.0032E+10 | cg18948488 | 0.0045315  | 30.1448069 | 2.86982157 | 316.643163 |
| cg04060356 | 0.00174426 | 10.6046579 | 2.4181069  | 46.5069467 | cg15233961 | 0.00453269 | 29.9630801 | 2.86425736 | 313.444657 |
| cg00969988 | 0.00174656 | 107240.866 | 75.9749004 | 151373721  | cg23325963 | 0.00453885 | 8.57197886 | 1.94399736 | 37.7977991 |
| cg24839533 | 0.00175372 | 730.371237 | 11.7459149 | 45415.1207 | cg13634292 | 0.00454481 | 6.27E-12   | 1.15E-19   | 0.0003427  |
| cg09479758 | 0.001756   | 122.853258 | 6.03231298 | 2502.01258 | cg13211302 | 0.0045469  | 112.603082 | 4.30990807 | 2941.93144 |
| cg16990120 | 0.00175643 | 93.3897913 | 5.44466277 | 1601.87205 | cg27200446 | 0.00455388 | 5.33542597 | 1.67802943 | 16.9644047 |
| cg01058070 | 0.00175807 | 17.9867664 | 2.94236905 | 109.953497 | cg13093774 | 0.00455575 | 8.62182748 | 1.9462763  | 38.1939138 |
| cg08826460 | 0.00176136 | 4243.36877 | 22.6187811 | 796072.009 | cg14965353 | 0.00455861 | 1425907908 | 674.821548 | 3.013E+15  |
| cg01864807 | 0.00176154 | 3771368.11 | 285.37257  | 4.9841E+10 | cg22876908 | 0.0045639  | 134.674456 | 4.5487352  | 3987.30819 |
| cg14374842 | 0.00176266 | 597428.388 | 143.359923 | 2489682404 | cg23124755 | 0.00457388 | 196366118  | 363.847372 | 1.0598E+14 |
| cg18686576 | 0.00176445 | 40.0914252 | 3.96608516 | 405.266731 | cg16734497 | 0.00457639 | 257659.095 | 46.8503898 | 1417025758 |
| cg08272286 | 0.00176469 | 43.3893736 | 4.08473494 | 460.895937 | cg08949329 | 0.00457852 | 15.1128201 | 2.31255316 | 98.7641431 |
| cg12985477 | 0.0017653  | 280.553087 | 8.19761736 | 9601.57457 | cg07560446 | 0.004585   | 0.08339847 | 0.01497136 | 0.46457413 |
| cg13656831 | 0.00176589 | 21.60913   | 3.14853339 | 148.308574 | cg18119621 | 0.00458548 | 57401.8576 | 29.4190782 | 112001241  |
| cg22802813 | 0.00176621 | 9.01629016 | 2.2720697  | 35.779487  | cg10927534 | 0.0045931  | 6.1148E+15 | 74082.6325 | 5.05E+26   |
| cg23892568 | 0.00176751 | 14.4426217 | 2.70854617 | 77.0115441 | cg05861291 | 0.00459816 | 20.9028846 | 2.5535138  | 171.109546 |



|            |            |            |            |            |            |            |            |            |            |
|------------|------------|------------|------------|------------|------------|------------|------------|------------|------------|
| cg03443162 | 0.00176788 | 1196.68976 | 14.0782419 | 101721.961 | cg24550644 | 0.00460334 | 5.71276548 | 1.71134406 | 19.0702093 |
| cg22715945 | 0.00176883 | 2172.287   | 17.5818586 | 268392.034 | cg26393255 | 0.00460713 | 10165.1686 | 17.1848134 | 6012905.09 |
| cg22402261 | 0.00176968 | 22.9537555 | 3.2189989  | 163.67663  | cg25423888 | 0.00460798 | 1654944.5  | 82.5610341 | 3.3174E+10 |
| cg10941484 | 0.00176996 | 711243739  | 2006.85856 | 2.5207E+14 | cg19632842 | 0.00461146 | 18433.2005 | 20.6303755 | 16470028.8 |
| cg16475951 | 0.0017744  | 78685.5199 | 66.9638244 | 92459041.9 | cg13523649 | 0.00461306 | 19.5281254 | 2.49862399 | 152.623077 |
| cg18128969 | 0.00177442 | 35.5449309 | 3.78734505 | 333.595723 | cg18202861 | 0.00461471 | 11023.5117 | 17.5985828 | 6904977.02 |
| cg00188822 | 0.00177576 | 6030001.49 | 337.518035 | 1.0773E+11 | cg04623837 | 0.00461669 | 8.51795358 | 1.93470162 | 37.5021826 |
| cg00557360 | 0.00178131 | 9.05551884 | 2.27323718 | 36.0729721 | cg27359949 | 0.00461762 | 3.06E-06   | 4.69E-10   | 0.02001619 |
| cg00727673 | 0.00178186 | 45.4262126 | 4.14623278 | 497.69053  | cg01822130 | 0.00462005 | 7.84418787 | 1.88598384 | 32.6255624 |
| cg01916115 | 0.00178251 | 10.8854566 | 2.43441799 | 48.6741252 | cg04111611 | 0.00462099 | 6642.24062 | 15.0413038 | 2933213.83 |
| cg19868691 | 0.00178268 | 31.0530893 | 3.59786464 | 268.018521 | cg08042370 | 0.00462335 | 61.4804942 | 3.5552135  | 1063.18542 |
| cg00414306 | 0.00178409 | 26437.0098 | 44.4391476 | 15727472.8 | cg13520531 | 0.00462611 | 38.5287999 | 3.07815172 | 482.259667 |
| cg08735211 | 0.00178467 | 8.58921323 | 2.22835167 | 33.1072446 | cg09076334 | 0.00462777 | 9.90800415 | 2.02606356 | 48.4528463 |
| cg27392771 | 0.00178486 | 34.3707623 | 3.7356175  | 316.239364 | cg11155414 | 0.00462839 | 376969.224 | 52.0982852 | 2727648232 |
| cg22344830 | 0.00178679 | 11.5282168 | 2.48616328 | 53.455774  | cg08309135 | 0.00462911 | 0.03731876 | 0.00383274 | 0.36336629 |
| cg27060381 | 0.00178685 | 130.144193 | 6.13289136 | 2761.74973 | cg12518535 | 0.0046327  | 39.1257517 | 3.09149795 | 495.172396 |
| cg15405796 | 0.00179148 | 1206.37168 | 14.0424122 | 103638.365 | cg27470087 | 0.00463508 | 45.390611  | 3.23561458 | 636.759265 |
| cg27531553 | 0.00179339 | 23.7566482 | 3.25244701 | 173.524221 | cg23814388 | 0.00463531 | 3.4536E+14 | 29807.312  | 4.00E+24   |
| cg06038049 | 0.00179831 | 7.0794E+10 | 10907.7629 | 4.5947E+17 | cg15447662 | 0.00464086 | 0.00788309 | 0.00027575 | 0.22536209 |
| cg22871962 | 0.00180224 | 9253834054 | 5100.29295 | 1.679E+16  | cg03302259 | 0.00464185 | 28.8543734 | 2.81342875 | 295.928896 |
| cg01784928 | 0.00180467 | 58.1468575 | 4.53194742 | 746.049484 | cg20986726 | 0.0046545  | 39010404.6 | 215.684915 | 7.0557E+12 |
| cg20744437 | 0.00180829 | 446.244264 | 9.66377892 | 20606.2188 | cg01126162 | 0.00465607 | 26.4995489 | 2.73854843 | 256.422739 |
| cg11697159 | 0.00180888 | 165364.377 | 87.1338304 | 313831919  | cg24053811 | 0.00465956 | 2318.30418 | 10.8217153 | 496643.474 |
| cg20157398 | 0.00181674 | 1105591.85 | 175.962406 | 6946559606 | cg25794571 | 0.0046608  | 372426.144 | 51.5419553 | 2691035528 |
| cg06761203 | 0.00181722 | 46.8312106 | 4.1748377  | 525.328755 | cg18431813 | 0.00466133 | 547824.73  | 58.0255746 | 5172063139 |
| cg15331996 | 0.00181967 | 49.1467143 | 4.24903812 | 568.457957 | cg14618996 | 0.00467265 | 13.8391554 | 2.24116017 | 85.456731  |
| cg14653418 | 0.00182046 | 11491.8127 | 32.2174436 | 4099076.3  | cg06947320 | 0.00467699 | 2523788.18 | 92.43109   | 6.8911E+10 |
| cg07619542 | 0.00182187 | 52626.847  | 56.664604  | 48876809   | cg00541565 | 0.00468389 | 3492674805 | 849.619954 | 1.4358E+16 |
| cg11376305 | 0.00182582 | 3.98638501 | 1.67093453 | 9.51040583 | cg10537421 | 0.00468774 | 29.1916281 | 2.81617252 | 302.591956 |
| cg03356734 | 0.00182614 | 16.6889379 | 2.84316816 | 97.9613704 | cg00689612 | 0.00471145 | 116.706277 | 4.30062625 | 3167.06321 |

|            |            |            |            |            |            |            |            |            |            |
|------------|------------|------------|------------|------------|------------|------------|------------|------------|------------|
| cg02938682 | 0.00182841 | 33.9374998 | 3.69931715 | 311.342296 | cg10801634 | 0.00471158 | 1.46E+10   | 1303.73466 | 1.6349E+17 |
| cg14898768 | 0.00182938 | 0.03708008 | 0.00466991 | 0.29442351 | cg10715223 | 0.00471281 | 6.14670139 | 1.74457032 | 21.656873  |
| cg05421149 | 0.0018299  | 0.06933661 | 0.01294355 | 0.37142562 | cg07317641 | 0.00471499 | 18.6736097 | 2.45208949 | 142.206759 |
| cg01656048 | 0.00183377 | 19490.488  | 39.0344193 | 9731901.46 | cg01437411 | 0.0047161  | 67.1614755 | 3.62945845 | 1242.79252 |
| cg11124980 | 0.00183723 | 1577.57449 | 15.3475165 | 162159.217 | cg01583595 | 0.00471767 | 0.06446686 | 0.00962651 | 0.43172181 |
| cg06449742 | 0.00184332 | 336550244  | 1447.92191 | 7.8227E+13 | cg00372169 | 0.0047201  | 118433626  | 297.322846 | 4.7176E+13 |
| cg02029242 | 0.00184342 | 0.09551759 | 0.02178808 | 0.41874328 | cg07203561 | 0.00472382 | 15.4874473 | 2.31454046 | 103.632245 |
| cg14855334 | 0.00184391 | 8.30665806 | 2.1917388  | 31.4821127 | cg14470448 | 0.00472842 | 14.5688479 | 2.27113279 | 93.4561507 |
| cg12905273 | 0.00184454 | 23936.2069 | 41.9782796 | 13648534.6 | cg16496928 | 0.00472965 | 410495.878 | 52.3224912 | 3220543636 |
| cg06924355 | 0.00184615 | 2811.15554 | 18.9711106 | 416559.454 | cg03473294 | 0.00473356 | 4.9147E+12 | 7674.84979 | 3.15E+21   |
| cg14605021 | 0.0018464  | 33.9395722 | 3.69180399 | 312.014009 | cg14066993 | 0.00474166 | 183.667495 | 4.92891973 | 6844.04506 |
| cg25294502 | 0.00184655 | 102.820035 | 5.56688721 | 1899.07919 | cg06598256 | 0.00474503 | 1601644956 | 654.50031  | 3.9194E+15 |
| cg07971674 | 0.00184947 | 1930409.8  | 213.142411 | 1.7484E+10 | cg07737104 | 0.00474791 | 760220.101 | 62.9285044 | 9183987561 |
| cg25905648 | 0.00184984 | 1145574514 | 2270.00454 | 5.7812E+14 | cg23600701 | 0.00475119 | 46.4260289 | 3.2339579  | 666.482442 |
| cg07485357 | 0.00185488 | 7.58222236 | 2.11732957 | 27.1521717 | cg07139165 | 0.0047532  | 0.1552766  | 0.0426151  | 0.56578114 |
| cg27124109 | 0.0018579  | 1788136315 | 2662.34301 | 1.201E+15  | cg02524205 | 0.00475845 | 13.670607  | 2.22440324 | 84.0160152 |
| cg04527260 | 0.00186018 | 0.00017623 | 7.61E-07   | 0.04079125 | cg06796825 | 0.0047633  | 30108.3921 | 23.376927  | 38778205.4 |
| cg02989600 | 0.00186467 | 73.9739222 | 4.91509283 | 1113.33424 | cg08877188 | 0.00476423 | 37.1012605 | 3.01728417 | 456.206131 |
| cg04299389 | 0.00186857 | 7.84500318 | 2.14227128 | 28.7284226 | cg09692396 | 0.00476557 | 48.4978014 | 3.27439484 | 718.311889 |
| cg23124755 | 0.00186859 | 42048572.6 | 660.262901 | 2.6778E+12 | cg15038123 | 0.00476587 | 8199.92403 | 15.7029602 | 4281915.84 |
| cg08183125 | 0.00187013 | 37.5418412 | 3.82183548 | 368.773028 | cg01030534 | 0.00476867 | 4.33418628 | 1.56529663 | 12.0010293 |
| cg06067302 | 0.00187126 | 111815.519 | 73.5878695 | 169901784  | cg00036011 | 0.00476976 | 5.83120741 | 1.71376435 | 19.8411059 |
| cg15705469 | 0.00187274 | 15502.5196 | 35.4245453 | 6784225.76 | cg27591870 | 0.00477259 | 10302923.1 | 138.752067 | 7.6504E+11 |
| cg04918504 | 0.0018732  | 12.0044544 | 2.50637396 | 57.4961789 | cg11525834 | 0.00477306 | 87273.595  | 32.3032689 | 235786676  |
| cg21091679 | 0.00187351 | 1078.48103 | 13.2201753 | 87980.78   | cg02466815 | 0.00477888 | 5.8986479  | 1.71933539 | 20.2369167 |
| cg21214613 | 0.00187547 | 47.9680527 | 4.18164021 | 550.246784 | cg18187587 | 0.00478316 | 25704484.9 | 182.907292 | 3.6123E+12 |
| cg24951781 | 0.00187561 | 38.5409728 | 3.85667098 | 385.152529 | cg07071389 | 0.00478413 | 8.87020629 | 1.94707775 | 40.4095624 |
| cg24250450 | 0.00187777 | 4.4683E+16 | 1423407.86 | 1.40E+27   | cg23514016 | 0.00479522 | 21.2737951 | 2.54166809 | 178.061943 |
| cg03871460 | 0.00187834 | 16.3816878 | 2.81037287 | 95.489     | cg14080475 | 0.00479561 | 7.56746005 | 1.85420484 | 30.8846414 |
| cg16500018 | 0.00187919 | 20082489.4 | 499.509129 | 8.0741E+11 | cg15765486 | 0.00480019 | 47.0026403 | 3.23607984 | 682.692734 |

|            |            |            |            |            |            |            |            |            |            |
|------------|------------|------------|------------|------------|------------|------------|------------|------------|------------|
| cg08008403 | 0.00188306 | 18.9507216 | 2.96450275 | 121.143368 | cg11050527 | 0.00480044 | 71589.6578 | 30.2533377 | 169405411  |
| cg22289434 | 0.00188982 | 11.2735063 | 2.4456924  | 51.9656288 | cg01913455 | 0.00480457 | 54.178135  | 3.37842221 | 868.828741 |
| cg07941017 | 0.00189225 | 481335.113 | 125.147556 | 1851282583 | cg04108127 | 0.00481026 | 231851.035 | 43.2086028 | 1244078704 |
| cg13075322 | 0.00189408 | 0.01836204 | 0.00147413 | 0.22872023 | cg14364729 | 0.00481032 | 3206643997 | 790.468431 | 1.3008E+16 |
| cg08254307 | 0.00189413 | 95.110932  | 5.37102877 | 1684.23775 | cg04617640 | 0.00481171 | 16.7555483 | 2.36130643 | 118.895369 |
| cg19770550 | 0.00189571 | 43431886   | 658.138746 | 2.8662E+12 | cg06427502 | 0.0048132  | 1971.68352 | 10.0986509 | 384955.965 |
| cg25204272 | 0.00189807 | 864.93809  | 12.1203583 | 61724.0747 | cg01988009 | 0.00481381 | 58919228.8 | 233.501267 | 1.4867E+13 |
| cg04444465 | 0.00190018 | 24913.0621 | 41.8446797 | 14832486.8 | cg06046912 | 0.0048163  | 25.8799416 | 2.69524274 | 248.501319 |
| cg14275576 | 0.00190224 | 5321.56956 | 23.6659119 | 1196619.96 | cg02189843 | 0.00481721 | 41.1310343 | 3.10378016 | 545.065016 |
| cg07317641 | 0.00190235 | 16.2246379 | 2.79444198 | 94.2008733 | cg23265500 | 0.00482183 | 12.9408428 | 2.18156125 | 76.7640204 |
| cg14165186 | 0.00190249 | 0.00010358 | 3.16E-07   | 0.03392392 | cg08790676 | 0.00482474 | 8.25226079 | 1.90193964 | 35.8054519 |
| cg17906146 | 0.00190754 | 136568.92  | 78.1630569 | 238617457  | cg26881035 | 0.00482749 | 6612761.43 | 119.466088 | 3.6603E+11 |
| cg18120111 | 0.00191169 | 908.414517 | 12.3055418 | 67060.5931 | cg18695750 | 0.00483006 | 6402.42022 | 14.4250094 | 2841660.86 |
| cg07967717 | 0.00191322 | 11.2618108 | 2.44037961 | 51.9707603 | cg03591499 | 0.00483365 | 216.227045 | 5.1391853  | 9097.57717 |
| cg13300282 | 0.00191467 | 217.77274  | 7.26630342 | 6526.69774 | cg18384277 | 0.00483646 | 199.626422 | 5.01447947 | 7947.12763 |
| cg01780754 | 0.00191606 | 189.753443 | 6.90524203 | 5214.35295 | cg00740389 | 0.00484369 | 12.5039836 | 2.15690201 | 72.4880424 |
| cg04330513 | 0.00191723 | 54.5560383 | 4.36222273 | 682.303839 | cg09173265 | 0.00484378 | 2.9581E+10 | 1535.67388 | 5.6979E+17 |
| cg21759784 | 0.00192189 | 0.03393027 | 0.004001   | 0.28774373 | cg10982433 | 0.00484473 | 14.8280383 | 2.27163927 | 96.7894512 |
| cg22402467 | 0.00192384 | 21.3192706 | 3.08413274 | 147.370862 | cg19137671 | 0.00484701 | 670402285  | 484.576706 | 9.2749E+14 |
| cg07392724 | 0.0019282  | 119906467  | 939.275968 | 1.5307E+13 | cg12233363 | 0.00485263 | 30.4304144 | 2.82586644 | 327.690688 |
| cg00576301 | 0.00192933 | 21185.8326 | 39.0582187 | 11491550.7 | cg01860010 | 0.0048563  | 542441175  | 452.949952 | 6.4961E+14 |
| cg23643471 | 0.00193093 | 2335.17143 | 17.3444728 | 314395.582 | cg03169170 | 0.00486795 | 342953568  | 392.533709 | 2.9964E+14 |
| cg26787998 | 0.00193833 | 67053.5943 | 59.492676  | 75575429   | cg02323652 | 0.00486927 | 1.0876E+13 | 9152.34401 | 1.29E+22   |
| cg15982308 | 0.0019393  | 898.782509 | 12.1853979 | 66293.2805 | cg00268086 | 0.00486934 | 10.202474  | 2.02546596 | 51.3908788 |
| cg20252067 | 0.00193968 | 780.316329 | 11.5674965 | 52638.319  | cg11622362 | 0.00487011 | 5064.42984 | 13.3562532 | 1920332.69 |
| cg21238818 | 0.0019405  | 18.4474516 | 2.91973611 | 116.55453  | cg02926368 | 0.00487447 | 3760.244   | 12.193714  | 1159567.54 |
| cg07276861 | 0.00194075 | 13404.9072 | 32.8928945 | 5462928.66 | cg04624228 | 0.00487535 | 16.7699361 | 2.35499533 | 119.418817 |
| cg05783676 | 0.00194141 | 6673.65469 | 25.4497417 | 1750024.32 | cg15970621 | 0.00490638 | 3847.03128 | 12.2260206 | 1210504.23 |
| cg22198615 | 0.00194157 | 28672.2381 | 43.4873187 | 18904298.1 | cg14658651 | 0.00490742 | 1.1958E+10 | 1138.02279 | 1.2566E+17 |
| cg12404990 | 0.00194427 | 543816.424 | 128.118917 | 2308295364 | cg00504134 | 0.00491004 | 5409.52225 | 13.550601  | 2159530.11 |

|            |            |            |            |            |            |            |            |            |            |
|------------|------------|------------|------------|------------|------------|------------|------------|------------|------------|
| cg02168442 | 0.0019446  | 25.5385381 | 3.28919428 | 198.290789 | cg23227945 | 0.00491118 | 2473185.83 | 86.7816226 | 7.0483E+10 |
| cg22303758 | 0.00194685 | 0.00955175 | 0.00050381 | 0.18109265 | cg17633033 | 0.00491374 | 80093585.4 | 248.904911 | 2.5773E+13 |
| cg02957185 | 0.00194724 | 9.87220622 | 2.31913775 | 42.0244359 | cg06243556 | 0.00491635 | 30.0553661 | 2.80530704 | 322.005761 |
| cg01555036 | 0.00195015 | 1232671974 | 2182.54579 | 6.962E+14  | cg08417719 | 0.0049194  | 0.11008423 | 0.02365214 | 0.51236548 |
| cg15987431 | 0.00195292 | 12.9463929 | 2.56084739 | 65.4506351 | cg26900458 | 0.0049217  | 1763.79188 | 9.63309268 | 322945.28  |
| cg25151638 | 0.00195314 | 1023233.8  | 161.003721 | 6503001285 | cg01038149 | 0.00493732 | 13.0215374 | 2.17516719 | 77.952829  |
| cg10321263 | 0.00195665 | 0.02420677 | 0.00229673 | 0.25513173 | cg03731862 | 0.00494682 | 31075179.6 | 185.084618 | 5.2174E+12 |
| cg08038761 | 0.00195699 | 235981.806 | 93.8117154 | 593608299  | cg01045986 | 0.0049501  | 230268.924 | 41.922525  | 1264804001 |
| cg18327128 | 0.00195842 | 0.11565478 | 0.02952407 | 0.45305502 | cg19544662 | 0.00495243 | 8.89422853 | 1.93702519 | 40.8395831 |
| cg11168687 | 0.00196148 | 14.8292977 | 2.68985053 | 81.7547547 | cg10858568 | 0.00495378 | 13042.8868 | 17.5768642 | 9678455.41 |
| cg05766064 | 0.0019618  | 8.49792404 | 2.19275682 | 32.9332977 | cg06615378 | 0.00495518 | 216901939  | 332.363532 | 1.4155E+14 |
| cg13912673 | 0.00196193 | 6370.41398 | 24.8793306 | 1631160.22 | cg25410636 | 0.00495909 | 713217.003 | 58.9056185 | 8635483436 |
| cg00955482 | 0.00196325 | 74759.5272 | 61.3853093 | 91047629.5 | cg16083849 | 0.00496046 | 144697.133 | 36.3525493 | 575950259  |
| cg21159993 | 0.0019657  | 44.1116291 | 4.01082655 | 485.145842 | cg03432464 | 0.00496174 | 0.06993959 | 0.01093404 | 0.4473686  |
| cg25522149 | 0.00197199 | 164.886894 | 6.49904786 | 4183.33397 | cg11514288 | 0.00496247 | 15.5569299 | 2.29298853 | 105.547004 |
| cg03097541 | 0.00197934 | 2.8748E+12 | 36700.4241 | 2.25E+20   | cg14775474 | 0.00496624 | 163182.518 | 37.6564078 | 707144831  |
| cg20772300 | 0.0019851  | 640.837285 | 10.6625415 | 38515.4351 | cg18642271 | 0.00497094 | 133837.189 | 35.4342162 | 505511198  |
| cg03665761 | 0.00198872 | 19.6132792 | 2.97305048 | 129.389233 | cg16270051 | 0.00497913 | 0.07560559 | 0.01247093 | 0.4583625  |
| cg07086112 | 0.00199329 | 17128.6359 | 35.4301576 | 8280803.37 | cg16066354 | 0.00498414 | 27.2863767 | 2.71447795 | 274.287125 |
| cg08417561 | 0.00199442 | 0.06936424 | 0.01277407 | 0.37665364 | cg19872463 | 0.0049913  | 8.91821973 | 1.93595417 | 41.0829162 |
| cg23792245 | 0.00199628 | 787435311  | 1798.23644 | 3.4481E+14 | cg23133255 | 0.00499388 | 32.5137072 | 2.8604866  | 369.566897 |
| cg07112260 | 0.00200087 | 152.315295 | 6.28480315 | 3691.43608 | cg16113047 | 0.00499505 | 12634.3446 | 17.2996911 | 9227139.57 |
| cg22721796 | 0.00200503 | 766.491667 | 11.3391736 | 51812.3716 | cg18501647 | 0.00500256 | 127.087511 | 4.31382062 | 3744.06744 |
| cg22492252 | 0.00200599 | 31229988.3 | 549.30198  | 1.7755E+12 | cg14424070 | 0.00500353 | 9.42243757 | 1.96750159 | 45.1244006 |
| cg03629151 | 0.00200779 | 20.776538  | 3.03107618 | 142.41296  | cg15945287 | 0.00500637 | 14.4114566 | 2.23635852 | 92.8697603 |
| cg19743881 | 0.00201335 | 398520.956 | 111.204143 | 1428174776 | cg11199172 | 0.00501631 | 34.7988729 | 2.91602233 | 415.27856  |
| cg01305328 | 0.00201878 | 8471666721 | 4222.23624 | 1.6998E+16 | cg14693391 | 0.00502144 | 13.02151   | 2.16763113 | 78.2235135 |
| cg02862835 | 0.00201952 | 12807.2139 | 31.614564  | 5188264.76 | cg09639151 | 0.00502228 | 24.027541  | 2.60711416 | 221.441291 |
| cg24910161 | 0.00202074 | 36.1933983 | 3.70762017 | 353.316149 | cg17157872 | 0.00502411 | 21.0998143 | 2.5067595  | 177.600669 |
| cg13326926 | 0.00202087 | 1477.38867 | 14.3631845 | 151963.325 | cg07469555 | 0.00502544 | 67.3475834 | 3.55617365 | 1275.44306 |

|            |            |            |            |            |            |            |            |            |            |
|------------|------------|------------|------------|------------|------------|------------|------------|------------|------------|
| cg03872783 | 0.0020209  | 8.24000158 | 2.15985197 | 31.4362406 | cg16944093 | 0.00502548 | 42.1023578 | 3.08673747 | 574.266049 |
| cg16225168 | 0.00202485 | 115.581444 | 5.66182385 | 2359.49945 | cg19872095 | 0.00502632 | 65.208849  | 3.52154794 | 1207.47866 |
| cg08568550 | 0.0020267  | 9.82198636 | 2.30196398 | 41.9083083 | cg22030047 | 0.00502846 | 78.9657091 | 3.73009811 | 1671.69416 |
| cg25335229 | 0.00202759 | 6994.01653 | 25.2936326 | 1933936.02 | cg06090684 | 0.00502971 | 34.8912384 | 2.91613478 | 417.469908 |
| cg21844656 | 0.00202812 | 0.06822907 | 0.01240013 | 0.37541584 | cg15844687 | 0.00503127 | 1.4936E+15 | 37281.2046 | 5.98E+25   |
| cg01169778 | 0.00202997 | 202.941445 | 6.94762408 | 5927.95892 | cg25401594 | 0.00504042 | 0.10792598 | 0.02277183 | 0.51151    |
| cg05021798 | 0.00203309 | 232.896041 | 7.30178322 | 7428.39991 | cg04793272 | 0.0050419  | 67.7848084 | 3.55917237 | 1290.96873 |
| cg10256686 | 0.00203653 | 247851.226 | 92.6800101 | 662820711  | cg01774894 | 0.00505183 | 5.43126887 | 1.66402777 | 17.7272773 |
| cg06359167 | 0.00203912 | 2337022.14 | 209.812172 | 2.6031E+10 | cg07394446 | 0.00505495 | 11.1030512 | 2.06330145 | 59.7478111 |
| cg09541379 | 0.00203941 | 178.653707 | 6.62215286 | 4819.75392 | cg15442444 | 0.00505934 | 41739.4985 | 24.544337  | 70981169.3 |
| cg13544006 | 0.00204944 | 8.49997352 | 2.18047555 | 33.1347673 | cg00994394 | 0.00506023 | 70565.2797 | 28.7397446 | 173260367  |
| cg18933494 | 0.00205534 | 71.9331643 | 4.74329609 | 1090.8828  | cg19378640 | 0.00506056 | 9.60477535 | 1.97484253 | 46.7134509 |
| cg21531300 | 0.0020591  | 13.4441461 | 2.57487013 | 70.195798  | cg18529840 | 0.00506181 | 0.08134859 | 0.0140749  | 0.47016961 |
| cg03467067 | 0.0020595  | 32570821.8 | 542.470882 | 1.9556E+12 | cg09415957 | 0.00506221 | 56.0526498 | 3.3568532  | 935.96573  |
| cg03887520 | 0.00206049 | 9.70585355 | 2.2867178  | 41.1959855 | cg13441378 | 0.005069   | 26.417614  | 2.6761799  | 260.778555 |
| cg21954542 | 0.00206156 | 0.00367604 | 0.00010392 | 0.13002984 | cg07145284 | 0.00506901 | 10.5047135 | 2.02812919 | 54.4092589 |
| cg24120357 | 0.00206698 | 21.8596262 | 3.0709953  | 155.598824 | cg07717381 | 0.00506932 | 5937.74929 | 13.6326912 | 2586200.05 |
| cg17169566 | 0.00206796 | 136300366  | 909.050469 | 2.0436E+13 | cg05963821 | 0.00507197 | 24.3071639 | 2.60962467 | 226.407354 |
| cg22126440 | 0.00207119 | 18.4373705 | 2.88552128 | 117.807702 | cg06391932 | 0.00507322 | 29.2231676 | 2.75801451 | 309.640692 |
| cg20263444 | 0.0020729  | 678994.625 | 131.900002 | 3495327483 | cg00388812 | 0.00507347 | 65.1367019 | 3.50935712 | 1208.9935  |
| cg25114752 | 0.00207635 | 0.09115673 | 0.01984506 | 0.41872129 | cg00188822 | 0.00507614 | 3998292.19 | 96.4301529 | 1.6578E+11 |
| cg16385703 | 0.00207692 | 879568.253 | 144.677591 | 5347340273 | cg21490342 | 0.00508182 | 324435.886 | 45.2781799 | 2324710141 |
| cg24965497 | 0.00207707 | 2.07E-05   | 2.15E-08   | 0.01982878 | cg24687970 | 0.00508265 | 11.9473267 | 2.10700499 | 67.744792  |
| cg07007550 | 0.00208317 | 15615.5679 | 33.3688783 | 7307586.42 | cg27064845 | 0.00509239 | 203.097792 | 4.93166263 | 8364.05814 |
| cg19285119 | 0.00208371 | 601867.457 | 125.705959 | 2881680683 | cg04247218 | 0.00510286 | 6.4139E+10 | 1752.0229  | 2.348E+18  |
| cg21956537 | 0.00208728 | 901359.108 | 145.35782  | 5589298481 | cg24089133 | 0.00510651 | 52.9596657 | 3.29084906 | 852.280412 |
| cg22888463 | 0.00208898 | 97.5936017 | 5.27631551 | 1805.14434 | cg07244253 | 0.00511968 | 1367.77191 | 8.71722153 | 214609.664 |
| cg14543527 | 0.0020893  | 529316498  | 1470.19365 | 1.9057E+14 | cg22402261 | 0.00512003 | 31.3246242 | 2.80901765 | 349.315029 |
| cg18664712 | 0.00209309 | 39878.108  | 46.7631989 | 34006730.5 | cg04304033 | 0.0051204  | 3332476.27 | 90.338034  | 1.2293E+11 |
| cg22997194 | 0.0020936  | 762311.004 | 136.432385 | 4259385100 | cg00731944 | 0.00513339 | 0.10206966 | 0.02064313 | 0.50468194 |

|            |            |            |            |            |            |            |            |            |            |
|------------|------------|------------|------------|------------|------------|------------|------------|------------|------------|
| cg06834005 | 0.00209987 | 12.7472292 | 2.51771103 | 64.5395163 | cg11270393 | 0.00513426 | 7.67679665 | 1.84174924 | 31.9984966 |
| cg03214395 | 0.00210215 | 55079.5663 | 52.4260929 | 57867341.5 | cg01395659 | 0.00513491 | 1655.5014  | 9.21444901 | 297433.4   |
| cg09201719 | 0.00210529 | 29.0571096 | 3.39299798 | 248.84059  | cg17091967 | 0.00513722 | 56.8979787 | 3.35587378 | 964.690628 |
| cg04040095 | 0.00210796 | 97.5467952 | 5.26191501 | 1808.34872 | cg13383058 | 0.00514522 | 13.3373698 | 2.1722799  | 81.8888175 |
| cg27401681 | 0.00211024 | 1.3466E+14 | 132215.886 | 1.37E+23   | cg19195724 | 0.00514748 | 0.03199686 | 0.00286963 | 0.35677101 |
| cg08343943 | 0.00211076 | 630754.79  | 126.511573 | 3144784270 | cg19403104 | 0.00515214 | 6.21899166 | 1.72823489 | 22.3788198 |
| cg07444414 | 0.00211208 | 38.1338274 | 3.74176826 | 388.636787 | cg03232620 | 0.00515626 | 7.07006434 | 1.79565421 | 27.8371022 |
| cg15726532 | 0.00211656 | 62378.5226 | 54.5912626 | 71276609.1 | cg06485940 | 0.0051654  | 18.9263355 | 2.41006294 | 148.629386 |
| cg18020334 | 0.00212556 | 53.4530563 | 4.22228499 | 676.702126 | cg25792651 | 0.00517222 | 20.1324353 | 2.45422864 | 165.14963  |
| cg00863378 | 0.0021256  | 29.927154  | 3.42257058 | 261.684756 | cg19664945 | 0.00517657 | 8.60143511 | 1.90286909 | 38.8805969 |
| cg19596493 | 0.00212663 | 5774.37782 | 22.9929465 | 1450159.47 | cg05951221 | 0.0051778  | 22.8908976 | 2.54960374 | 205.519463 |
| cg17253939 | 0.00212819 | 4.2923E+11 | 16228.7789 | 1.1352E+19 | cg03120789 | 0.00519429 | 18686.4922 | 18.8745261 | 18500331.5 |
| cg10648455 | 0.00212902 | 0.00159585 | 2.62E-05   | 0.09721427 | cg01348004 | 0.00519712 | 25.4311378 | 2.62851855 | 246.048395 |
| cg15193461 | 0.00213054 | 87.0225492 | 5.03372064 | 1504.43869 | cg17532444 | 0.00519933 | 7925.59393 | 14.5984749 | 4302849.41 |
| cg10013356 | 0.00213058 | 1185.39074 | 12.9516985 | 108491.656 | cg17519645 | 0.00521185 | 12.3853151 | 2.11906592 | 72.3885123 |
| cg05436939 | 0.00213453 | 76.2440231 | 4.79611941 | 1212.05303 | cg00169633 | 0.00521333 | 3.5577E+10 | 1407.43511 | 8.9931E+17 |
| cg20495332 | 0.00213658 | 2711.92989 | 17.4496866 | 421472.538 | cg23813257 | 0.00521908 | 578.091808 | 6.66686577 | 50127.0238 |
| cg09270822 | 0.0021461  | 9.02E-10   | 1.51E-15   | 0.00053836 | cg05651282 | 0.0052201  | 29.080864  | 2.73262748 | 309.481134 |
| cg09360748 | 0.00214685 | 7599214.17 | 306.66623  | 1.8831E+11 | cg19241779 | 0.00522501 | 5065921.94 | 99.8676798 | 2.5698E+11 |
| cg07207099 | 0.00214709 | 5.86099532 | 1.89467477 | 18.1304288 | cg25412979 | 0.00523151 | 66.1158964 | 3.48864783 | 1253.01033 |
| cg14515252 | 0.00215162 | 85617.901  | 60.5224773 | 121119050  | cg12742785 | 0.00523804 | 4429471.58 | 95.6513321 | 2.0512E+11 |
| cg26694487 | 0.00215586 | 535674.866 | 117.191713 | 2448531163 | cg15518400 | 0.00524252 | 2278.81009 | 10.0092844 | 518815.854 |
| cg23528791 | 0.00215665 | 19.704446  | 2.93413822 | 132.326824 | cg26257814 | 0.00524282 | 6.14078945 | 1.71728168 | 21.9587127 |
| cg16761581 | 0.00216363 | 6.08899864 | 1.9193312  | 19.3170957 | cg24839533 | 0.00524294 | 556.085544 | 6.57469696 | 47033.5187 |
| cg00536924 | 0.00216519 | 14.1231876 | 2.59997934 | 76.7176972 | cg00352195 | 0.00525889 | 4.4624E+11 | 2937.23859 | 6.7794E+19 |
| cg22467567 | 0.00216521 | 14.5094446 | 2.62541325 | 80.1869892 | cg25587223 | 0.00526099 | 10.9134337 | 2.03683256 | 58.4746323 |
| cg01268763 | 0.00216687 | 65.2003179 | 4.51450504 | 941.649509 | cg00489699 | 0.00526513 | 413962200  | 366.721419 | 4.6729E+14 |
| cg15826897 | 0.00217207 | 9.05772904 | 2.21393541 | 37.0572941 | cg06086785 | 0.00526862 | 1313974.48 | 66.1470441 | 2.6101E+10 |
| cg13676119 | 0.00217294 | 20617.9105 | 35.9663069 | 11819346.2 | cg23302845 | 0.00527533 | 292867266  | 329.818454 | 2.6006E+14 |
| cg24745816 | 0.0021772  | 9.53902325 | 2.25491564 | 40.3531569 | cg02297043 | 0.00527537 | 35.4673624 | 2.89048624 | 435.197989 |

|            |            |            |            |            |            |            |            |            |            |
|------------|------------|------------|------------|------------|------------|------------|------------|------------|------------|
| cg00221357 | 0.00217766 | 12512080.9 | 361.936636 | 4.3254E+11 | cg03177847 | 0.00527592 | 14.480278  | 2.21433823 | 94.6912476 |
| cg03340356 | 0.00218581 | 14.6836329 | 2.63256183 | 81.9008588 | cg22866937 | 0.00527786 | 32.7571063 | 2.8225659  | 380.160482 |
| cg12487497 | 0.00218717 | 4756157989 | 3062.51641 | 7.3864E+15 | cg16399136 | 0.00527829 | 5.92127961 | 1.69709934 | 20.6596935 |
| cg15522728 | 0.00219368 | 331125.007 | 97.1547793 | 1128547363 | cg18023065 | 0.00527905 | 0.13753571 | 0.0341229  | 0.55435122 |
| cg04693399 | 0.00219447 | 2159.027   | 15.8642224 | 293830.825 | cg10552964 | 0.00528    | 0.01652888 | 0.00092536 | 0.29523903 |
| cg20370281 | 0.00219518 | 15.7518274 | 2.69802475 | 91.9635992 | cg22517351 | 0.00528287 | 3.0455E+10 | 1309.11061 | 7.0852E+17 |
| cg14638988 | 0.00219877 | 26.1300236 | 3.23618521 | 210.982403 | cg23650853 | 0.0052871  | 1480872.85 | 68.2652189 | 3.2124E+10 |
| cg05951994 | 0.0022007  | 12.5458742 | 2.48481395 | 63.3443637 | cg05423529 | 0.00528956 | 19.6432733 | 2.42304572 | 159.245112 |
| cg05952925 | 0.00220314 | 8.84715002 | 2.19098879 | 35.7245386 | cg21103829 | 0.00529584 | 6606486.68 | 106.250698 | 4.1078E+11 |
| cg03707974 | 0.00220325 | 23.7638435 | 3.12623523 | 180.639081 | cg14986464 | 0.00529984 | 26.1965683 | 2.63813867 | 260.130446 |
| cg24903183 | 0.00220455 | 5.47188376 | 1.84304831 | 16.2456468 | cg21084284 | 0.00530047 | 27.2619127 | 2.66947714 | 278.411032 |
| cg02259384 | 0.00220559 | 11.9997416 | 2.44449134 | 58.9054241 | cg00087884 | 0.00530138 | 63.7284961 | 3.4351416  | 1182.28641 |
| cg17668148 | 0.00220877 | 18672.302  | 34.356159  | 10148249.2 | cg04739149 | 0.00530295 | 1.0814E+10 | 955.371667 | 1.2241E+17 |
| cg02847037 | 0.00221229 | 13843.7916 | 30.8220391 | 6217971.7  | cg08491668 | 0.00530359 | 2173.41485 | 9.79770966 | 482126.156 |
| cg03762702 | 0.00221493 | 93280.4429 | 61.145601  | 142303631  | cg09388058 | 0.00530635 | 842801.466 | 57.5010807 | 1.2353E+10 |
| cg01481989 | 0.00221578 | 8.28409546 | 2.1381408  | 32.09622   | cg26454350 | 0.00531105 | 261362.299 | 40.577749  | 1683441126 |
| cg15442444 | 0.00221674 | 27301.8027 | 39.2950908 | 18968996.3 | cg03087607 | 0.00531261 | 17.694655  | 2.34656875 | 133.42921  |
| cg04529955 | 0.00221677 | 1.0756E+10 | 4030.00007 | 2.8709E+16 | cg15586420 | 0.00531349 | 769.838248 | 7.19142197 | 82410.8127 |
| cg12360736 | 0.00221767 | 9.02110381 | 2.20439226 | 36.917347  | cg27639662 | 0.00531741 | 37.5732543 | 2.93359922 | 481.234597 |
| cg01294490 | 0.00222574 | 110.198301 | 5.41283887 | 2243.49288 | cg10573476 | 0.00531798 | 7.73123154 | 1.83489531 | 32.5751233 |
| cg07502066 | 0.00222667 | 304142.796 | 93.12036   | 993368584  | cg19431506 | 0.00533365 | 1823.4309  | 9.26767125 | 358763.293 |
| cg09859398 | 0.00222835 | 7.76213226 | 2.08718824 | 28.8669207 | cg25225632 | 0.00533681 | 993698670  | 465.127982 | 2.1229E+15 |
| cg20750843 | 0.00223098 | 9893773.34 | 324.546141 | 3.0161E+11 | cg11105830 | 0.00533841 | 15439.5297 | 17.4491483 | 13661358.9 |
| cg12272369 | 0.00223324 | 1588.97702 | 14.0919192 | 179169.916 | cg11346237 | 0.00534098 | 272.131305 | 5.26896444 | 14055.0289 |
| cg03980541 | 0.00224339 | 5.55919804 | 1.85009146 | 16.7044082 | cg20747741 | 0.0053455  | 645.441347 | 6.8031869  | 61235.2031 |
| cg19646112 | 0.0022498  | 9.56080569 | 2.24631765 | 40.6928225 | cg07362258 | 0.00534745 | 36902614.6 | 174.703879 | 7.7949E+12 |
| cg19785066 | 0.00225406 | 5.91185381 | 1.89035138 | 18.4886344 | cg20275528 | 0.0053529  | 5.86651836 | 1.68898443 | 20.3767643 |
| cg01553230 | 0.00225525 | 1.33E-05   | 9.87E-09   | 0.01789387 | cg02070114 | 0.00535944 | 21260664.2 | 147.90872  | 3.056E+12  |
| cg10573476 | 0.00225858 | 6.70764343 | 1.97738838 | 22.7534868 | cg22799396 | 0.00535962 | 20.8453926 | 2.45815331 | 176.77107  |
| cg15742848 | 0.00225957 | 6.85325925 | 1.99255344 | 23.5713439 | cg09718046 | 0.00536882 | 128424.741 | 32.5197054 | 507166778  |

|            |            |            |            |            |            |            |            |            |            |
|------------|------------|------------|------------|------------|------------|------------|------------|------------|------------|
| cg10282807 | 0.00226403 | 9.85127911 | 2.26848332 | 42.7808745 | cg23042086 | 0.00536949 | 221.048342 | 4.94239949 | 9886.36588 |
| cg15728769 | 0.00226807 | 5605.4524  | 21.9698451 | 1430192    | cg03467067 | 0.00538026 | 92116415.5 | 227.002955 | 3.738E+13  |
| cg18731976 | 0.00227625 | 591.39483  | 9.80780726 | 35660.1466 | cg26541027 | 0.00538037 | 2278589.1  | 75.9855594 | 6.8328E+10 |
| cg17091967 | 0.00227945 | 43.9950768 | 3.8702789  | 500.110413 | cg04981940 | 0.00538229 | 21.4428033 | 2.47617874 | 185.686843 |
| cg17034360 | 0.00228136 | 7183.37229 | 23.9310458 | 2156229.94 | cg17266233 | 0.00538783 | 28.769691  | 2.70033533 | 306.515681 |
| cg13606421 | 0.00228664 | 26.4892637 | 3.22596132 | 217.510695 | cg00142642 | 0.00539127 | 69.5530084 | 3.50501243 | 1380.2008  |
| cg06727703 | 0.00229666 | 82.8424021 | 4.84312164 | 1417.03308 | cg22249338 | 0.00540196 | 34865.035  | 21.9907591 | 55276430.6 |
| cg02396009 | 0.00230295 | 5643209.47 | 257.165905 | 1.2383E+11 | cg14138132 | 0.00540911 | 7053358884 | 811.059643 | 6.1339E+16 |
| cg02335251 | 0.00230389 | 9.4922114  | 2.23297112 | 40.350758  | cg03460682 | 0.00541424 | 33.7765083 | 2.82753666 | 403.4793   |
| cg20577613 | 0.00230549 | 1.4249E+11 | 9571.75703 | 2.1213E+18 | cg10608717 | 0.00541642 | 9576819397 | 885.478668 | 1.0358E+17 |
| cg09540111 | 0.00230565 | 695.160978 | 10.3366256 | 46751.1164 | cg04816394 | 0.00541919 | 16.7419673 | 2.29776035 | 121.98551  |
| cg21496913 | 0.00230895 | 16749.3399 | 32.1528203 | 8725218.67 | cg02987906 | 0.00543477 | 0.06813316 | 0.01025343 | 0.45273889 |
| cg08864344 | 0.00230914 | 9.04424109 | 2.19406952 | 37.2815429 | cg15066337 | 0.0054351  | 12.8780364 | 2.12516849 | 78.0379639 |
| cg13338827 | 0.00231434 | 10.1799076 | 2.28789859 | 45.295066  | cg25975823 | 0.00543732 | 4217853.16 | 89.9716354 | 1.9773E+11 |
| cg09992998 | 0.0023191  | 34396499.1 | 486.520172 | 2.4318E+12 | cg01294023 | 0.00544223 | 2571744615 | 595.520146 | 1.1106E+16 |
| cg24631877 | 0.0023225  | 46.3728809 | 3.9259271  | 547.75446  | cg10832938 | 0.0054453  | 46.7679539 | 3.10712187 | 703.94455  |
| cg20028470 | 0.00232363 | 28.7708173 | 3.31131317 | 249.979354 | cg17095910 | 0.00545553 | 4103.76862 | 11.6073244 | 1450887.06 |
| cg21883802 | 0.00233256 | 22.9810559 | 3.05413319 | 172.922691 | cg05789714 | 0.00546346 | 55.4722885 | 3.26388665 | 942.794623 |
| cg12416569 | 0.00233407 | 14.5822316 | 2.59704219 | 81.8783305 | cg02852873 | 0.00546487 | 25801.502  | 19.9250828 | 33411028.3 |
| cg23601397 | 0.00233823 | 41.1683969 | 3.75681973 | 451.136073 | cg09176275 | 0.00546735 | 33.4573374 | 2.81167226 | 398.123722 |
| cg00263248 | 0.00233846 | 37.3434668 | 3.62855148 | 384.322648 | cg13581941 | 0.00547443 | 481669.388 | 47.0944973 | 4926380199 |
| cg18486906 | 0.00234256 | 16.4223934 | 2.70756583 | 99.6079222 | cg05816157 | 0.00548477 | 36.5873759 | 2.88398093 | 464.162595 |
| cg14611892 | 0.0023475  | 46404.6834 | 45.7321894 | 47087066.5 | cg01692674 | 0.00548584 | 21604.0594 | 18.8502786 | 24760131.8 |
| cg00821731 | 0.00234797 | 22.7253558 | 3.03800496 | 169.993731 | cg26081613 | 0.00548697 | 196084206  | 275.221254 | 1.397E+14  |
| cg18299211 | 0.00234816 | 3143.15788 | 17.5466855 | 563037.472 | cg10614773 | 0.00548772 | 279309.568 | 40.0135674 | 1949684569 |
| cg09559971 | 0.00234933 | 173282.393 | 73.0351103 | 411128123  | cg02601318 | 0.00549544 | 441058.938 | 45.7007067 | 4256673489 |
| cg15049402 | 0.00235169 | 17.8564836 | 2.78746369 | 114.388578 | cg06553210 | 0.00549664 | 14829.6128 | 16.84856   | 13052594.3 |
| cg18202751 | 0.00235275 | 106943.757 | 61.4478688 | 186124716  | cg09209002 | 0.00549865 | 19324.5411 | 18.2072257 | 20510422.3 |
| cg26796815 | 0.00235435 | 4601.39956 | 20.0662064 | 1055151.01 | cg23740975 | 0.005504   | 0.04375873 | 0.00480383 | 0.39860411 |
| cg08655760 | 0.00235778 | 681.282283 | 10.1677094 | 45648.9785 | cg12439852 | 0.00550625 | 11.4024902 | 2.04488435 | 63.5814847 |



|            |            |            |            |            |            |            |            |            |            |
|------------|------------|------------|------------|------------|------------|------------|------------|------------|------------|
| cg21665738 | 0.00236128 | 15.474255  | 2.64717844 | 90.4557714 | cg26898605 | 0.00551223 | 38.3480118 | 2.91974275 | 503.664238 |
| cg05682719 | 0.00236199 | 16.7336691 | 2.72167673 | 102.88352  | cg17469276 | 0.00551347 | 28.9982576 | 2.68939992 | 312.671587 |
| cg15145873 | 0.00236318 | 45.5989596 | 3.88599213 | 535.066734 | cg05817661 | 0.00551434 | 1.1496E+11 | 1776.34063 | 7.4401E+18 |
| cg25947283 | 0.00236804 | 317.966731 | 7.74249826 | 13058.1679 | cg10660256 | 0.00553314 | 39.2143605 | 2.93559324 | 523.834857 |
| cg11282402 | 0.00237074 | 1.7618E+11 | 9860.60227 | 3.1478E+18 | cg26175971 | 0.00553341 | 40.2855429 | 2.95886167 | 548.496398 |
| cg25362068 | 0.00237313 | 43921.7    | 44.5151278 | 43336183.2 | cg07229186 | 0.00553428 | 6.16808595 | 1.70571074 | 22.3046518 |
| cg08026651 | 0.00237419 | 9.59015044 | 2.23149288 | 41.2150028 | cg14022778 | 0.00553819 | 8.53237581 | 1.87590235 | 38.8087561 |
| cg13522186 | 0.00237794 | 5185.98149 | 20.8242456 | 1291494.76 | cg09877947 | 0.00553848 | 20.1829779 | 2.41504384 | 168.672961 |
| cg13222081 | 0.00237936 | 475.01624  | 8.91226455 | 25317.968  | cg15030629 | 0.00554293 | 1.104E+10  | 883.621762 | 1.3794E+17 |
| cg10602180 | 0.00238239 | 12.9531471 | 2.48142681 | 67.6159455 | cg18021716 | 0.00555955 | 9.83732445 | 1.95447308 | 49.5135766 |
| cg15893346 | 0.00238274 | 1252.45684 | 12.5644411 | 124848.221 | cg25258291 | 0.00556055 | 1720108212 | 509.290848 | 5.8096E+15 |
| cg06383048 | 0.00239224 | 85155.2623 | 55.9852322 | 129523777  | cg10014563 | 0.00556942 | 28.6567089 | 2.6725394  | 307.275907 |
| cg14089714 | 0.00239278 | 10.9099531 | 2.33323813 | 51.0136855 | cg23033906 | 0.00557371 | 8.09647345 | 1.84520966 | 35.5259805 |
| cg05162137 | 0.00239515 | 8.368E+16  | 997297.583 | 7.02E+27   | cg10879207 | 0.00557692 | 14.9458346 | 2.20784398 | 101.174709 |
| cg15345154 | 0.0023988  | 11.4583453 | 2.37323056 | 55.3227648 | cg02636234 | 0.0055799  | 1.4962E+12 | 3672.88294 | 6.09E+20   |
| cg01090026 | 0.00240584 | 9.03086242 | 2.18031527 | 37.4058179 | cg06604199 | 0.00558285 | 19.168809  | 2.374137   | 154.76918  |
| cg18158177 | 0.00241004 | 3.0532E+12 | 26345.1871 | 3.54E+20   | cg18343556 | 0.00558444 | 121.879746 | 4.07990052 | 3640.93985 |
| cg03507534 | 0.00241146 | 17.6802809 | 2.7648629  | 113.05889  | cg27625401 | 0.00558568 | 114.285606 | 4.00342899 | 3262.50317 |
| cg13397067 | 0.00241206 | 825106.042 | 124.350147 | 5474862672 | cg03743720 | 0.00559587 | 71.5611566 | 3.48847305 | 1467.97727 |
| cg03403116 | 0.00241277 | 5643141.91 | 245.551436 | 1.2969E+11 | cg00373148 | 0.00560077 | 146.252399 | 4.29834477 | 4976.27929 |
| cg18123399 | 0.00241836 | 221404533  | 897.599574 | 5.4612E+13 | cg12872647 | 0.00560708 | 77.87768   | 3.5732932  | 1697.2951  |
| cg20028233 | 0.00241845 | 28838.9516 | 37.8640847 | 21965013.4 | cg24868790 | 0.00560871 | 36.9803489 | 2.87377506 | 475.870998 |
| cg05403387 | 0.00241863 | 824.645252 | 10.7633809 | 63180.8723 | cg12506775 | 0.00561407 | 6.20978975 | 1.70538182 | 22.6116453 |
| cg26060255 | 0.002423   | 67.6152703 | 4.43982939 | 1029.72983 | cg23849812 | 0.0056156  | 0.10158634 | 0.02013523 | 0.5125237  |
| cg17106175 | 0.0024275  | 19.5423487 | 2.86101779 | 133.485151 | cg03980541 | 0.00562052 | 5.62527153 | 1.6565332  | 19.1023517 |
| cg01610602 | 0.00242773 | 133056638  | 746.115064 | 2.3728E+13 | cg18334142 | 0.00562367 | 1734916.25 | 66.5110983 | 4.5255E+10 |
| cg02156680 | 0.00242903 | 9.69422363 | 2.23261927 | 42.0931473 | cg10793756 | 0.00562454 | 1475169278 | 477.188556 | 4.5603E+15 |
| cg12824106 | 0.0024295  | 604949.665 | 110.72558  | 3305145004 | cg03450370 | 0.00562709 | 111.362611 | 3.96168989 | 3130.38916 |
| cg18113295 | 0.00243407 | 7.11523843 | 2.00081226 | 25.3030326 | cg11343211 | 0.00563506 | 6.36335349 | 1.71661476 | 23.5884419 |
| cg17792849 | 0.00243455 | 188.920008 | 6.3756095  | 5598.01683 | cg09841537 | 0.00563794 | 250595.36  | 37.691847  | 1666090666 |

|            |            |            |            |            |            |            |            |            |            |
|------------|------------|------------|------------|------------|------------|------------|------------|------------|------------|
| cg04608177 | 0.0024383  | 9.49182211 | 2.21480278 | 40.6784241 | cg11475922 | 0.00564691 | 646830.14  | 49.6258643 | 8430870400 |
| cg25345578 | 0.00243853 | 0.07269311 | 0.01334312 | 0.39603093 | cg20568322 | 0.00564695 | 315.421958 | 5.36076463 | 18559.1084 |
| cg17470143 | 0.00244131 | 21.1057885 | 2.93667837 | 151.686448 | cg07107420 | 0.00565642 | 14.4134113 | 2.17765621 | 95.399092  |
| cg19865525 | 0.00244647 | 191.824189 | 6.39947781 | 5749.92532 | cg15852352 | 0.00565983 | 0.14147318 | 0.03540275 | 0.56534199 |
| cg10786226 | 0.00244792 | 0.0497852  | 0.00714882 | 0.34671004 | cg08009622 | 0.00566563 | 11.8959383 | 2.058384   | 68.7497314 |
| cg06635722 | 0.0024497  | 13.1769185 | 2.48505734 | 69.8700903 | cg07105272 | 0.0056659  | 16.7868744 | 2.27576945 | 123.825879 |
| cg20066737 | 0.00245207 | 0.03203317 | 0.00345689 | 0.29683429 | cg20240860 | 0.00567248 | 858.536551 | 7.16184341 | 102918.336 |
| cg17960769 | 0.00245506 | 2087.82829 | 14.8425622 | 293684.266 | cg15528052 | 0.00567638 | 55189.4336 | 24.0830094 | 126473961  |
| cg09560599 | 0.00245548 | 15951.4214 | 30.4163569 | 8365493.76 | cg07382273 | 0.00567928 | 152301694  | 242.090283 | 9.5815E+13 |
| cg03856286 | 0.00245631 | 164164.634 | 69.2280696 | 389293351  | cg19808978 | 0.00568315 | 6.79216962 | 1.74724114 | 26.4036641 |
| cg01974375 | 0.00245912 | 45.4945251 | 3.84513156 | 538.278542 | cg01350077 | 0.00568512 | 5.87419227 | 1.67479583 | 20.6031889 |
| cg00154846 | 0.00245934 | 27.5639825 | 3.22203069 | 235.805677 | cg15670863 | 0.00568753 | 3169.6306  | 10.4609479 | 960386.982 |
| cg06830503 | 0.00246284 | 123558.273 | 62.4976607 | 244275494  | cg14656297 | 0.00570026 | 15289.7379 | 16.5122895 | 14157702.6 |
| cg00260114 | 0.00246303 | 16473.3085 | 30.7046898 | 8838060.08 | cg26433208 | 0.005704   | 549697.204 | 46.8017753 | 6456315262 |
| cg17691657 | 0.00246402 | 468.392572 | 8.74622905 | 25084.1363 | cg12649455 | 0.00570594 | 11.6850756 | 2.04469834 | 66.778062  |
| cg15436096 | 0.0024641  | 7.75626449 | 2.0594163  | 29.2119854 | cg08548478 | 0.00571128 | 18215.6012 | 17.3480144 | 19126576.7 |
| cg25490585 | 0.00246434 | 2547375518 | 2075.31861 | 3.1268E+15 | cg06822966 | 0.00571632 | 1127683.64 | 57.5404997 | 2.21E+10   |
| cg00152259 | 0.00246542 | 126.640139 | 5.51338514 | 2908.87078 | cg17480669 | 0.00572891 | 1085.40558 | 7.62411113 | 154523.622 |
| cg26527984 | 0.00247121 | 46.3306427 | 3.86521435 | 555.345254 | cg10857203 | 0.00573184 | 135495.42  | 30.988164  | 592452291  |
| cg08680689 | 0.00247226 | 71284692.3 | 585.804846 | 8.6744E+12 | cg18506672 | 0.00574005 | 28.1957851 | 2.63760283 | 301.41092  |
| cg20342628 | 0.00247284 | 70.3293918 | 4.47699851 | 1104.8079  | cg17129986 | 0.00574299 | 11.2371769 | 2.01892778 | 62.5451521 |
| cg09643398 | 0.0024752  | 28.7645624 | 3.26629591 | 253.314481 | cg21476824 | 0.00574458 | 69020.5442 | 25.4198469 | 187406145  |
| cg00362285 | 0.00247665 | 16.5167431 | 2.68603665 | 101.563322 | cg16776006 | 0.00574461 | 645315.549 | 48.6491474 | 8559906601 |
| cg14553243 | 0.00247951 | 13.6297886 | 2.50974994 | 74.0197791 | cg26918756 | 0.0057474  | 26.7473155 | 2.59659202 | 275.522254 |
| cg07076277 | 0.00248061 | 206.796424 | 6.54029241 | 6538.66192 | cg14855334 | 0.00575497 | 8.49647906 | 1.86078985 | 38.7954375 |
| cg23748035 | 0.00248134 | 82.016002  | 4.72161809 | 1424.64394 | cg26283550 | 0.00575522 | 941348.819 | 54.1711    | 1.6358E+10 |
| cg01663570 | 0.00248273 | 557366.267 | 105.591522 | 2942065320 | cg07087293 | 0.00575608 | 27.7444052 | 2.62322863 | 293.436878 |
| cg03525527 | 0.00248483 | 5.1796E+15 | 341407.577 | 7.86E+25   | cg07037112 | 0.0057567  | 18.4042874 | 2.32858166 | 145.460991 |
| cg06888121 | 0.00248748 | 8.67540713 | 2.13955307 | 35.1768274 | cg26873311 | 0.00576148 | 272470323  | 280.169414 | 2.6498E+14 |
| cg01313358 | 0.00248889 | 60.960407  | 4.24968809 | 874.457406 | cg15916004 | 0.00576161 | 17.6256512 | 2.29907864 | 135.125252 |

|            |            |            |            |            |            |            |            |            |            |
|------------|------------|------------|------------|------------|------------|------------|------------|------------|------------|
| cg06787764 | 0.00249244 | 8.87335101 | 2.15600671 | 36.5195329 | cg20557104 | 0.00576498 | 9.43641355 | 1.91769938 | 46.4337119 |
| cg00609948 | 0.00249297 | 292.599323 | 7.37724561 | 11605.1936 | cg01184452 | 0.0057675  | 28.4126907 | 2.63994123 | 305.795063 |
| cg17526770 | 0.00249488 | 30.8971869 | 3.34376774 | 285.497149 | cg14383422 | 0.00576917 | 6.41540483 | 1.7144203  | 24.0066098 |
| cg13258989 | 0.00249667 | 8696.034   | 24.3158259 | 3109950.19 | cg02155398 | 0.00577265 | 9.67609322 | 1.93121365 | 48.4807986 |
| cg26839512 | 0.00249812 | 9.98099677 | 2.2463673  | 44.3472876 | cg06028808 | 0.00577869 | 132.164227 | 4.11991083 | 4239.74782 |
| cg23955930 | 0.00249867 | 44811522.5 | 491.394762 | 4.0865E+12 | cg10210369 | 0.0057828  | 9.92816161 | 1.9450102  | 50.6775712 |
| cg14399447 | 0.00249981 | 5198755409 | 2614.26919 | 1.0338E+16 | cg24688655 | 0.00578729 | 16.1456346 | 2.23898425 | 116.428472 |
| cg16849024 | 0.00249988 | 11.7244601 | 2.37699059 | 57.8306724 | cg21872782 | 0.00579303 | 24.4413628 | 2.52413871 | 236.666952 |
| cg02102829 | 0.0024999  | 55169550.4 | 528.384069 | 5.7604E+12 | cg26419426 | 0.0057936  | 9887207.64 | 106.238056 | 9.2017E+11 |
| cg02002664 | 0.00250264 | 3534515.47 | 200.791944 | 6.2218E+10 | cg03602233 | 0.00579686 | 20.7281977 | 2.4060759  | 178.572164 |
| cg24577137 | 0.00250646 | 3375.80745 | 17.3947882 | 655143.124 | cg08067677 | 0.0057978  | 5963440.19 | 91.6772878 | 3.8791E+11 |
| cg02801839 | 0.00251269 | 301379.631 | 84.202851  | 1078700793 | cg09503045 | 0.00580009 | 10.6581664 | 1.98424169 | 57.2493314 |
| cg16721177 | 0.00251888 | 6.62515014 | 1.94281639 | 22.5922607 | cg17777874 | 0.00580355 | 48606871.5 | 168.079558 | 1.4057E+13 |
| cg07740599 | 0.00251982 | 0.01810113 | 0.00134067 | 0.24439329 | cg10099601 | 0.00580959 | 15.2355621 | 2.19971858 | 105.523659 |
| cg09577511 | 0.00251985 | 10.8874054 | 2.3130082  | 51.2473743 | cg10119082 | 0.00581135 | 7.40533855 | 1.78508697 | 30.7206538 |
| cg05221455 | 0.00252031 | 9.67348388 | 2.21887986 | 42.1727612 | cg05446860 | 0.00581601 | 8.07522831 | 1.83013451 | 35.630885  |
| cg09262011 | 0.00252124 | 395.075966 | 8.16364652 | 19119.5219 | cg10939691 | 0.0058242  | 32.9085267 | 2.74694264 | 394.245993 |
| cg12819417 | 0.00252531 | 139.083949 | 5.65504741 | 3420.72194 | cg23039189 | 0.00582496 | 16.2441635 | 2.23952286 | 117.825477 |
| cg13631572 | 0.00252604 | 4.73192409 | 1.72572465 | 12.9749005 | cg24949907 | 0.00583132 | 0.08445832 | 0.0145754  | 0.48940056 |
| cg05972308 | 0.00252618 | 5.80E-08   | 1.17E-12   | 0.00288147 | cg09308608 | 0.0058325  | 4.261E+11  | 2302.46823 | 7.8854E+19 |
| cg16306898 | 0.00252691 | 4.92991171 | 1.75067317 | 13.8826766 | cg02851517 | 0.00583286 | 1057403.94 | 55.1607807 | 2.027E+10  |
| cg16797831 | 0.00253187 | 9.2866216  | 2.18585082 | 39.4543579 | cg15994744 | 0.00583399 | 50.3514368 | 3.10477597 | 816.570089 |
| cg24053811 | 0.00253378 | 905.754432 | 10.9010229 | 75258.175  | cg15080119 | 0.00583677 | 6.25428988 | 1.69876393 | 23.0262377 |
| cg01940297 | 0.00253492 | 8.31295198 | 2.10217645 | 32.8731541 | cg06890747 | 0.00583859 | 18.9526251 | 2.34030853 | 153.48489  |
| cg16553500 | 0.00253774 | 16.2518869 | 2.65902517 | 99.3310742 | cg25507767 | 0.00584604 | 29.5670533 | 2.66033358 | 328.609409 |
| cg14071579 | 0.00253789 | 7.4940721  | 2.02676106 | 27.7097866 | cg13354228 | 0.00584608 | 1.49E-17   | 1.61E-29   | 1.37E-05   |
| cg27123975 | 0.00254252 | 64367.966  | 48.5336197 | 85368350.3 | cg19006008 | 0.00584902 | 7.69576382 | 1.80306692 | 32.8466903 |
| cg09357934 | 0.0025449  | 31.8570796 | 3.36488986 | 301.606757 | cg15811902 | 0.00586063 | 8132.41628 | 13.4552462 | 4915271.99 |
| cg03418154 | 0.00254496 | 76649.9517 | 51.5620761 | 113944502  | cg17559110 | 0.00586594 | 10716428.1 | 106.919978 | 1.0741E+12 |
| cg21349401 | 0.00254534 | 100577.825 | 56.7080079 | 178385720  | cg26779378 | 0.00586874 | 14.0185051 | 2.14250648 | 91.723636  |

|            |            |            |            |            |            |            |            |            |            |
|------------|------------|------------|------------|------------|------------|------------|------------|------------|------------|
| cg23305408 | 0.00254583 | 12.625793  | 2.43240601 | 65.5362009 | cg11206381 | 0.00586978 | 17.2029159 | 2.27278895 | 130.210205 |
| cg16391745 | 0.00254757 | 1248463.18 | 137.011525 | 1.1376E+10 | cg27037013 | 0.0058707  | 68.4736178 | 3.38574927 | 1384.81499 |
| cg26143525 | 0.00255222 | 1270864736 | 1548.34999 | 1.0431E+15 | cg27607583 | 0.00587239 | 2.3764E+10 | 985.832377 | 5.7286E+17 |
| cg24398023 | 0.00255252 | 15405.4516 | 29.3247177 | 8093102.23 | cg18315708 | 0.00587941 | 82.6814156 | 3.57308111 | 1913.25533 |
| cg02323652 | 0.00255629 | 1.1734E+12 | 16889.0205 | 8.1523E+19 | cg16590005 | 0.00589394 | 9.80280919 | 1.93077138 | 49.7702984 |
| cg25163611 | 0.00255641 | 18.668906  | 2.78763055 | 125.02663  | cg16332610 | 0.00590644 | 6.25972873 | 1.69606885 | 23.1029559 |
| cg22970435 | 0.00255821 | 17.323326  | 2.71518094 | 110.525828 | cg03804903 | 0.00591089 | 997583.788 | 53.4049977 | 1.8634E+10 |
| cg21152671 | 0.00255884 | 15.6103962 | 2.61784206 | 93.0860086 | cg11910375 | 0.00591493 | 22.6021133 | 2.45409063 | 208.164898 |
| cg17969560 | 0.00255941 | 23.8571527 | 3.0369192  | 187.414842 | cg14559139 | 0.00591939 | 31896.5733 | 19.7898988 | 51409630.6 |
| cg03357260 | 0.00256781 | 542493.963 | 101.606186 | 2896474226 | cg15961211 | 0.00592033 | 8.18559887 | 1.83154464 | 36.5833448 |
| cg17221444 | 0.00257162 | 226.26675  | 6.66561939 | 7680.70291 | cg01974375 | 0.00592472 | 65.3114643 | 3.32906779 | 1281.31586 |
| cg07154254 | 0.00257305 | 2173.64747 | 14.70629   | 321273.642 | cg03071876 | 0.00592556 | 20.9328219 | 2.3993616  | 182.624841 |
| cg14539086 | 0.00257324 | 0.00299777 | 6.86E-05   | 0.13100239 | cg05406954 | 0.0059265  | 308642823  | 277.27022  | 3.4357E+14 |
| cg14849798 | 0.00257414 | 7.46697634 | 2.02042207 | 27.5960833 | cg20567404 | 0.00593825 | 1003896.66 | 53.2135143 | 1.8939E+10 |
| cg25016127 | 0.00258046 | 1.0562E+10 | 3198.07749 | 3.4885E+16 | cg13939859 | 0.005944   | 9.42498318 | 1.90595577 | 46.6066997 |
| cg18410627 | 0.00258344 | 48584.1054 | 43.482664  | 54284054.3 | cg22157173 | 0.00595128 | 2573.28767 | 9.55401134 | 693092.065 |
| cg04558861 | 0.00258431 | 121.823188 | 5.35905874 | 2769.30892 | cg24005914 | 0.00595176 | 16360.558  | 16.2566441 | 16465136.1 |
| cg15433343 | 0.00258754 | 4531276.73 | 211.936291 | 9.688E+10  | cg21931680 | 0.0059527  | 62.370121  | 3.27979064 | 1186.06107 |
| cg26067203 | 0.00258834 | 5.67140177 | 1.83393235 | 17.5387048 | cg21942490 | 0.00595847 | 43.0253169 | 2.94693301 | 628.171013 |
| cg19678561 | 0.00258855 | 1407502.96 | 140.797213 | 1.407E+10  | cg09965384 | 0.00595889 | 9.80679379 | 1.92690629 | 49.9106807 |
| cg00264591 | 0.00258939 | 9.20184741 | 2.17174296 | 38.9889582 | cg05637351 | 0.00597008 | 27.4845271 | 2.58948498 | 291.717942 |
| cg07616871 | 0.00259101 | 29.5453149 | 3.26418651 | 267.42517  | cg12783819 | 0.00597076 | 5.12982782 | 1.59914875 | 16.4557133 |
| cg24546463 | 0.00259494 | 23.9527256 | 3.03247094 | 189.196558 | cg04481181 | 0.00597427 | 13.1246852 | 2.09399831 | 82.2624162 |
| cg13166888 | 0.00259705 | 17.0775187 | 2.69407478 | 108.252988 | cg12635790 | 0.00598557 | 15.5586147 | 2.19783269 | 110.140545 |
| cg19502671 | 0.00260686 | 0.0033377  | 8.15E-05   | 0.13668054 | cg01786994 | 0.00599829 | 19.2813166 | 2.336109   | 159.140336 |
| cg13451356 | 0.00261145 | 44.5347291 | 3.76001725 | 527.48218  | cg08417561 | 0.00599906 | 0.07296824 | 0.01127805 | 0.47209953 |
| cg09108404 | 0.00261342 | 6343824.53 | 235.957362 | 1.7056E+11 | cg10612237 | 0.00599968 | 13947701.5 | 111.798228 | 1.7401E+12 |
| cg12291552 | 0.00261479 | 4938.74767 | 19.4222904 | 1255836.88 | cg02631680 | 0.00601097 | 134018.919 | 29.4587546 | 609702308  |
| cg21760146 | 0.00261596 | 20.8317078 | 2.8835039  | 150.497473 | cg23753247 | 0.00601755 | 85.3591181 | 3.57461262 | 2038.31291 |
| cg27062369 | 0.00261714 | 32.4966642 | 3.36687253 | 313.654044 | cg21491013 | 0.00601779 | 0.07791738 | 0.01261157 | 0.48139269 |

|            |            |            |            |            |            |            |            |            |            |
|------------|------------|------------|------------|------------|------------|------------|------------|------------|------------|
| cg13418419 | 0.00261894 | 1.186E+12  | 16221.0309 | 8.6719E+19 | cg22256433 | 0.00602286 | 7.82769327 | 1.80270505 | 33.9893551 |
| cg13997864 | 0.00262191 | 8.66466305 | 2.1228128  | 35.3664656 | cg25768103 | 0.0060279  | 1513927.54 | 58.810943  | 3.8972E+10 |
| cg00049382 | 0.0026275  | 16.7420554 | 2.66970433 | 104.991559 | cg22690294 | 0.00604458 | 91.8312958 | 3.6439407  | 2314.24921 |
| cg11780327 | 0.00262778 | 135828.679 | 61.4707715 | 300133373  | cg25415989 | 0.00604965 | 190.477482 | 4.48800407 | 8084.14402 |
| cg12250513 | 0.00263318 | 33.1958646 | 3.38718553 | 325.333647 | cg16489547 | 0.0060545  | 66.7976043 | 3.32484306 | 1341.99415 |
| cg05888175 | 0.00263445 | 120.536099 | 5.30700475 | 2737.69326 | cg20533957 | 0.00605794 | 0.08173565 | 0.01366957 | 0.48872919 |
| cg04848570 | 0.00263603 | 0.05355434 | 0.00794873 | 0.36082088 | cg25917723 | 0.00606121 | 2365453.71 | 66.3668548 | 8.431E+10  |
| cg25098208 | 0.00263626 | 24.0624594 | 3.02730273 | 191.260011 | cg22232207 | 0.00606917 | 6.88255618 | 1.73529206 | 27.2977562 |
| cg00807892 | 0.00263702 | 2986098.35 | 179.825186 | 4.9586E+10 | cg02060584 | 0.00607301 | 8.31035877 | 1.83111587 | 37.7158344 |
| cg13255216 | 0.00263759 | 19.8104011 | 2.82880923 | 138.73399  | cg19906093 | 0.00607422 | 444.242668 | 5.70589431 | 34587.3122 |
| cg01528028 | 0.00263894 | 20.8559432 | 2.8796351  | 151.050516 | cg16797831 | 0.00607672 | 11.6067447 | 2.01423261 | 66.8823059 |
| cg05467676 | 0.00264189 | 15.2050116 | 2.57907645 | 89.6415374 | cg08391942 | 0.00607866 | 3.1197E+11 | 1917.37972 | 5.0758E+19 |
| cg21992932 | 0.00264377 | 221.878701 | 6.55544339 | 7509.81361 | cg04738888 | 0.00607929 | 6.88590809 | 1.73505683 | 27.328056  |
| cg15664069 | 0.00264921 | 31478.5046 | 36.7276539 | 26979568.4 | cg02084834 | 0.0060821  | 5.0727E+11 | 2200.09344 | 1.17E+20   |
| cg10350722 | 0.0026503  | 9.89158592 | 2.21950363 | 44.0834926 | cg18153578 | 0.00609243 | 142232084  | 212.2815   | 9.5298E+13 |
| cg21534578 | 0.00265153 | 30.0227044 | 3.26560434 | 276.017143 | cg22273939 | 0.00609555 | 27.3357085 | 2.57032522 | 290.718448 |
| cg17139983 | 0.00265414 | 178267.177 | 67.0440397 | 474004649  | cg16000360 | 0.00610765 | 1123.9199  | 7.41388897 | 170382.366 |
| cg11245431 | 0.00265518 | 197538.763 | 69.4590153 | 561792628  | cg16348385 | 0.00611162 | 42.5095109 | 2.91300224 | 620.342303 |
| cg25220065 | 0.0026568  | 3.6114E+10 | 4691.79825 | 2.7798E+17 | cg07806866 | 0.00611642 | 2.1067E+14 | 12112.1079 | 3.66E+24   |
| cg09730369 | 0.0026577  | 0.04414755 | 0.00576772 | 0.33791587 | cg22905097 | 0.00611785 | 18.966684  | 2.31361204 | 155.486354 |
| cg15961211 | 0.00266119 | 6.3102693  | 1.89724029 | 20.9881157 | cg26163234 | 0.00612198 | 10.8646152 | 1.97358194 | 59.8099634 |
| cg13893782 | 0.0026617  | 15.5922585 | 2.59823389 | 93.5706849 | cg10510742 | 0.00612463 | 102.101553 | 3.73664995 | 2789.85918 |
| cg06319102 | 0.00266776 | 169.37854  | 5.94921326 | 4822.3334  | cg12605679 | 0.00612637 | 2910.82165 | 9.70514337 | 873030.138 |
| cg09298971 | 0.00267384 | 19.7644685 | 2.81893548 | 138.575082 | cg09270822 | 0.00612696 | 3.03E-10   | 4.73E-17   | 0.00194077 |
| cg19643344 | 0.00267495 | 1.0863E+11 | 6802.83372 | 1.7347E+18 | cg05778739 | 0.00613069 | 89495098.7 | 184.172817 | 4.3488E+13 |
| cg13787135 | 0.00267562 | 16.7065714 | 2.65875142 | 104.97767  | cg23020159 | 0.00613107 | 124446508  | 202.288298 | 7.6559E+13 |
| cg20925462 | 0.00267903 | 13.9116417 | 2.49442236 | 77.5866095 | cg06852305 | 0.00613155 | 0.03830508 | 0.00371606 | 0.39484806 |
| cg16259747 | 0.00268036 | 70718.1219 | 48.2558847 | 103636122  | cg21505923 | 0.00613396 | 41.1492034 | 2.882761   | 587.373333 |
| cg23058435 | 0.00268173 | 94.6296323 | 4.85205277 | 1845.56263 | cg16492833 | 0.00613622 | 405.785493 | 5.53123924 | 29769.4349 |
| cg18021716 | 0.00268244 | 10.3615306 | 2.25143746 | 47.6856753 | cg16212145 | 0.0061457  | 0.10343724 | 0.02040966 | 0.5242255  |

|            |            |            |            |            |            |            |            |            |            |
|------------|------------|------------|------------|------------|------------|------------|------------|------------|------------|
| cg25479082 | 0.00268783 | 92692.8224 | 52.8970028 | 162428094  | cg26277456 | 0.00615214 | 113742.992 | 27.4640052 | 471069976  |
| cg00741410 | 0.00269055 | 14.2733063 | 2.51484684 | 81.0098134 | cg25004679 | 0.00615434 | 67225.2494 | 23.6386305 | 191180033  |
| cg15590133 | 0.00269154 | 0.02020222 | 0.00157988 | 0.25832946 | cg08229199 | 0.00615622 | 86.8681378 | 3.56148389 | 2118.80036 |
| cg19048426 | 0.00269193 | 1032568.76 | 121.915926 | 8745356664 | cg02770985 | 0.00615737 | 4440.0479  | 10.9061267 | 1807610.15 |
| cg04550737 | 0.00269378 | 4.83968291 | 1.72787629 | 13.5556757 | cg14097171 | 0.00615753 | 23.1381525 | 2.44424289 | 219.034739 |
| cg27502766 | 0.0026944  | 1873912.39 | 149.782543 | 2.3444E+10 | cg04037038 | 0.00616162 | 5.27833791 | 1.6051124  | 17.3575701 |
| cg15066337 | 0.00269527 | 11.2387735 | 2.31408262 | 54.5831984 | cg00067742 | 0.00616291 | 0.1267843  | 0.02892256 | 0.55576878 |
| cg08599448 | 0.00269541 | 46.8757995 | 3.79719099 | 578.675286 | cg02319549 | 0.00616907 | 0.00013328 | 2.25E-07   | 0.07909309 |
| cg20154865 | 0.00269779 | 5018.22467 | 19.1904074 | 1312248.27 | cg01868762 | 0.00617574 | 479686512  | 293.416451 | 7.8421E+14 |
| cg04747728 | 0.00270219 | 1031.59782 | 11.0800797 | 96045.7051 | cg00676042 | 0.00618214 | 1388334064 | 396.148169 | 4.8655E+15 |
| cg03233656 | 0.00271736 | 33.5881472 | 3.37628511 | 334.143473 | cg15390960 | 0.00618314 | 49884225.4 | 153.916372 | 1.6167E+13 |
| cg22852309 | 0.00272221 | 117009701  | 620.368151 | 2.207E+13  | cg24886748 | 0.00618499 | 2.9178E+10 | 940.267731 | 9.0544E+17 |
| cg01022951 | 0.00272293 | 3223777627 | 1954.15344 | 5.3183E+15 | cg09862200 | 0.006187   | 31.4375206 | 2.66318776 | 371.103276 |
| cg27591870 | 0.00272375 | 6754681.14 | 231.03161  | 1.9749E+11 | cg23431851 | 0.0061946  | 6.25963727 | 1.68346118 | 23.2752968 |
| cg06820762 | 0.00272418 | 52218.1991 | 42.9290467 | 63517374.1 | cg18859544 | 0.00620065 | 3808066228 | 524.700918 | 2.7637E+16 |
| cg07007152 | 0.00272751 | 188335.182 | 66.8539717 | 530561457  | cg11055795 | 0.00620802 | 396689588  | 275.534313 | 5.7112E+14 |
| cg12649455 | 0.00272892 | 8.73808733 | 2.11688762 | 36.0690712 | cg21028142 | 0.00621476 | 43.3589837 | 2.91365317 | 645.238592 |
| cg14244577 | 0.00272965 | 48.2078447 | 3.82183076 | 608.084563 | cg09179916 | 0.0062183  | 33.671662  | 2.71149334 | 418.138892 |
| cg23177883 | 0.00273044 | 406.545841 | 7.99035862 | 20684.8689 | cg25060020 | 0.00622448 | 29698.4563 | 18.5484816 | 47550970.9 |
| cg23062425 | 0.00273205 | 144698.522 | 60.9467786 | 343540098  | cg04111314 | 0.00622598 | 30.3047973 | 2.63071131 | 349.09978  |
| cg17146950 | 0.0027327  | 174.02835  | 5.95623315 | 5084.73489 | cg15658376 | 0.00622916 | 7.2368E+10 | 1198.60858 | 4.3694E+18 |
| cg08225020 | 0.00273436 | 3.55E-06   | 9.66E-10   | 0.0130378  | cg27331241 | 0.00624344 | 5.15918035 | 1.59175301 | 16.7219045 |
| cg19370322 | 0.00273508 | 3421193373 | 1981.84389 | 5.9059E+15 | cg04195127 | 0.00625657 | 240.736531 | 4.72350205 | 12269.3029 |
| cg13873511 | 0.0027362  | 146926.617 | 61.1961074 | 352758233  | cg15185033 | 0.00625946 | 894.556972 | 6.8476871  | 116861.674 |
| cg21316772 | 0.00273782 | 76.177848  | 4.47343079 | 1297.22909 | cg10786226 | 0.00626691 | 0.04092504 | 0.00413766 | 0.4047838  |
| cg01407244 | 0.00274424 | 20.909852  | 2.85959224 | 152.896592 | cg01130898 | 0.00627644 | 70.5075449 | 3.332482   | 1491.77517 |
| cg23078565 | 0.00274511 | 2.0491E+11 | 8108.78588 | 5.178E+18  | cg07694975 | 0.00628197 | 14.4364038 | 2.1274586  | 97.9618377 |
| cg12829717 | 0.00274765 | 35.9598513 | 3.447871   | 375.046197 | cg18492839 | 0.00628316 | 0.00743227 | 0.0002209  | 0.25006328 |
| cg09674170 | 0.00275155 | 11.4173409 | 2.31899352 | 56.2121766 | cg00783905 | 0.00628346 | 6106387951 | 584.699891 | 6.3773E+16 |
| cg04186360 | 0.00275214 | 12.2841774 | 2.37827303 | 63.4498279 | cg00356183 | 0.00628734 | 5.26110201 | 1.59899173 | 17.3104049 |

|            |            |            |            |            |            |            |            |            |            |
|------------|------------|------------|------------|------------|------------|------------|------------|------------|------------|
| cg10310846 | 0.00275403 | 4.6372E+11 | 10690.6934 | 2.0114E+19 | cg11245431 | 0.00629409 | 364447.749 | 37.3027387 | 3560654425 |
| cg24265806 | 0.00275595 | 3424.88632 | 16.6167175 | 705906.346 | cg04805577 | 0.00630579 | 20.7089867 | 2.35364174 | 182.212153 |
| cg24345247 | 0.00275894 | 24320212.9 | 354.737542 | 1.6674E+12 | cg02239891 | 0.00630621 | 2.959E+11  | 1737.3275  | 5.0396E+19 |
| cg22354234 | 0.00276102 | 96269.7492 | 52.5089442 | 176500685  | cg25547520 | 0.00630947 | 12.495224  | 2.04038764 | 76.5200788 |
| cg07164388 | 0.00276527 | 435.876064 | 8.14331596 | 23330.538  | cg12030002 | 0.00631905 | 122.832351 | 3.88805647 | 3880.54717 |
| cg18542853 | 0.00276654 | 0.06231815 | 0.01011931 | 0.3837762  | cg18025886 | 0.00633103 | 13.6270056 | 2.08935079 | 88.8770245 |
| cg01964850 | 0.00276775 | 106643.796 | 54.294634  | 209466359  | cg00503383 | 0.00634427 | 15.6069716 | 2.16978052 | 112.259078 |
| cg21241889 | 0.0027699  | 22.1517474 | 2.91157611 | 168.534119 | cg17210546 | 0.00635426 | 1425.54324 | 7.73976117 | 262562.821 |
| cg16097357 | 0.00277183 | 5.44092587 | 1.79370964 | 16.5041619 | cg26982447 | 0.00636486 | 50.4561905 | 3.01717299 | 843.778984 |
| cg24893721 | 0.00277385 | 607.716898 | 9.12080951 | 40492.001  | cg04615531 | 0.00636889 | 9430430.63 | 92.021342  | 9.6644E+11 |
| cg09072291 | 0.00278265 | 14.7005941 | 2.52545319 | 85.5717568 | cg06378498 | 0.00637128 | 935093.747 | 47.9820668 | 1.8223E+10 |
| cg20829550 | 0.00278597 | 9.29451894 | 2.15593952 | 40.0698079 | cg13395333 | 0.00637228 | 5481.8827  | 11.2884621 | 2662102.03 |
| cg02441149 | 0.00278686 | 74.8909473 | 4.42445797 | 1267.6477  | cg19858931 | 0.00637459 | 1415.98566 | 7.70957029 | 260068.37  |
| cg21090962 | 0.00278829 | 17414465.9 | 312.39646  | 9.7077E+11 | cg23176237 | 0.00637561 | 4088757.54 | 72.6249393 | 2.302E+11  |
| cg04797936 | 0.00279192 | 24356297.5 | 350.15563  | 1.6942E+12 | cg27072683 | 0.00637854 | 1185.91335 | 7.33140708 | 191830.908 |
| cg27648858 | 0.00279229 | 8.58066277 | 2.09669688 | 35.1160792 | cg25444017 | 0.00638109 | 145.406352 | 4.06050954 | 5206.98377 |
| cg26834010 | 0.00279615 | 2109957.83 | 150.558536 | 2.9569E+10 | cg23085143 | 0.00639264 | 0.09026215 | 0.01602441 | 0.50842768 |
| cg21415068 | 0.00279682 | 82539.7847 | 49.3092729 | 138165008  | cg12164596 | 0.00639473 | 36.1938959 | 2.74367012 | 477.461955 |
| cg25755428 | 0.0027993  | 7.1717556  | 1.97043556 | 26.102898  | cg25110734 | 0.00639577 | 14.7855357 | 2.13291964 | 102.494281 |
| cg09374838 | 0.00280228 | 4.78154507 | 1.71357577 | 13.3423766 | cg21880079 | 0.00639745 | 49255.2892 | 20.8677594 | 116259895  |
| cg07453451 | 0.0028031  | 23.0148994 | 2.94285296 | 179.990506 | cg09374838 | 0.00640322 | 5.63007633 | 1.62547015 | 19.5006715 |
| cg08087125 | 0.00280613 | 9.5017E+14 | 142524.316 | 6.33E+24   | cg22508569 | 0.00640577 | 9065.9275  | 12.9521342 | 6345752.78 |
| cg18797229 | 0.0028148  | 2637036.81 | 161.506093 | 4.3057E+10 | cg04519918 | 0.00640657 | 160686.281 | 29.0555895 | 888644199  |
| cg14229668 | 0.00281539 | 63710.5388 | 44.8823853 | 90437099.9 | cg25137841 | 0.00640892 | 78.6059862 | 3.40949296 | 1812.26392 |
| cg22905097 | 0.00281672 | 16.4138198 | 2.61727035 | 102.936818 | cg06838028 | 0.00641319 | 60.5747298 | 3.16798589 | 1158.24313 |
| cg14098532 | 0.00282363 | 15.7491528 | 2.57916225 | 96.1691394 | cg17785773 | 0.00642215 | 14.3656816 | 2.11369109 | 97.6362198 |
| cg21388527 | 0.00282612 | 30.6283732 | 3.24093123 | 289.452994 | cg02956255 | 0.00642354 | 77.1387471 | 3.38856177 | 1756.0212  |
| cg14548272 | 0.00283173 | 15.7103274 | 2.57560955 | 95.827563  | cg24345247 | 0.00643097 | 54034386.9 | 148.196844 | 1.9702E+13 |
| cg15447662 | 0.00283407 | 0.01228582 | 0.00068387 | 0.22071505 | cg01726823 | 0.00644476 | 1127590.22 | 49.8800025 | 2.549E+10  |
| cg10982433 | 0.00283492 | 10.8403277 | 2.26699365 | 51.8363623 | cg25061763 | 0.006445   | 54457.2359 | 21.3148061 | 139132888  |

|            |            |            |            |            |            |            |            |            |            |
|------------|------------|------------|------------|------------|------------|------------|------------|------------|------------|
| cg04904815 | 0.00283597 | 0.00976574 | 0.00046744 | 0.20402462 | cg04881464 | 0.00644578 | 4246.07724 | 10.4178786 | 1730599.15 |
| cg12493107 | 0.0028432  | 56.9565685 | 4.00440144 | 810.121248 | cg07410044 | 0.00645166 | 999374087  | 334.215585 | 2.9883E+15 |
| cg16212145 | 0.00284713 | 0.11457987 | 0.02760971 | 0.47550472 | cg27494647 | 0.00645352 | 8.39470919 | 1.81601566 | 38.8053605 |
| cg14106308 | 0.00285066 | 385.036493 | 7.70795756 | 19233.7723 | cg17980283 | 0.00645537 | 484.958954 | 5.66352901 | 41526.2615 |
| cg23797439 | 0.00285232 | 22.7924403 | 2.92232073 | 177.768076 | cg04467958 | 0.00645726 | 94066794.9 | 172.025774 | 5.1437E+13 |
| cg16838838 | 0.00285359 | 59.2989652 | 4.05610358 | 866.932316 | cg08661338 | 0.00646067 | 0.05312132 | 0.00642523 | 0.43918683 |
| cg08962452 | 0.00285614 | 0.08729587 | 0.01758471 | 0.4333633  | cg26405020 | 0.00647467 | 25.7667904 | 2.48485826 | 267.189279 |
| cg26433777 | 0.00285765 | 93.8557707 | 4.74585067 | 1856.12787 | cg07554231 | 0.00648157 | 466702.739 | 38.6924539 | 5629300396 |
| cg18706864 | 0.0028592  | 198734221  | 699.831527 | 5.6435E+13 | cg00489408 | 0.00648824 | 875.435823 | 6.66364235 | 115010.356 |
| cg23584743 | 0.00286013 | 5.65162046 | 1.81075484 | 17.6395022 | cg15583193 | 0.00648896 | 0.10546524 | 0.02087862 | 0.53274205 |
| cg21509551 | 0.00286099 | 98.5452311 | 4.82410987 | 2013.04755 | cg26996201 | 0.00649251 | 7.76833316 | 1.7750351  | 33.9976376 |
| cg00651087 | 0.00286208 | 3109.40046 | 15.7470101 | 613981.396 | cg05123019 | 0.00649668 | 6975.32778 | 11.9018826 | 4088025.34 |
| cg14323199 | 0.00287368 | 35.0446196 | 3.38091078 | 363.252816 | cg24546680 | 0.00650045 | 1548590294 | 372.669566 | 6.435E+15  |
| cg21922731 | 0.00287469 | 161.475301 | 5.70460374 | 4570.74219 | cg13265524 | 0.00650478 | 19.9371429 | 2.30976083 | 172.091267 |
| cg23076086 | 0.00287542 | 3922.55137 | 17.0079697 | 904658.791 | cg22225546 | 0.00650862 | 2378.12684 | 8.79613395 | 642951.471 |
| cg16411251 | 0.0028777  | 17.3625518 | 2.65736696 | 113.442445 | cg22005150 | 0.00651558 | 598.882122 | 5.97762919 | 60000.3422 |
| cg03120789 | 0.0028782  | 12129.0747 | 25.0195837 | 5879972.05 | cg09827532 | 0.00652299 | 261243638  | 225.175178 | 3.0309E+14 |
| cg17964980 | 0.00288095 | 21725.2904 | 30.5262647 | 15461709.7 | cg06055873 | 0.00652827 | 29.3875976 | 2.57181825 | 335.805568 |
| cg12216208 | 0.00288285 | 6.67093036 | 1.9147275  | 23.2415901 | cg05984290 | 0.00653421 | 10169.7318 | 13.1649356 | 7855978.01 |
| cg25769935 | 0.00288939 | 7093.54967 | 20.7732306 | 2422273.55 | cg07730673 | 0.0065343  | 1505.36758 | 7.72062188 | 293516.711 |
| cg04963082 | 0.00289113 | 719.508574 | 9.49221744 | 54538.6357 | cg14521552 | 0.00653908 | 0.10035043 | 0.01913785 | 0.52619323 |
| cg12165563 | 0.00289259 | 807.031839 | 9.87013041 | 65987.0095 | cg14849798 | 0.00654184 | 7.83825605 | 1.77706647 | 34.572853  |
| cg21940568 | 0.00289477 | 30.2156427 | 3.2081055  | 284.586982 | cg24448326 | 0.00654436 | 83160.9814 | 23.6418814 | 292521087  |
| cg04001842 | 0.00289711 | 166.893968 | 5.75396383 | 4840.76669 | cg27361964 | 0.00655296 | 86.5275222 | 3.47253235 | 2156.06691 |
| cg15923947 | 0.00290446 | 12.965902  | 2.40067672 | 70.0280108 | cg13342722 | 0.00655619 | 74.6070373 | 3.33118568 | 1670.93958 |
| cg06200512 | 0.00290522 | 813764510  | 1109.86839 | 5.9666E+14 | cg09118164 | 0.00655764 | 80704.2815 | 23.3977311 | 278368062  |
| cg21158815 | 0.00290845 | 9.56906141 | 2.16346662 | 42.3241733 | cg00930347 | 0.00655914 | 8896805227 | 596.952693 | 1.326E+17  |
| cg05216888 | 0.00290851 | 2.5258E+10 | 3583.82397 | 1.7801E+17 | cg16243019 | 0.00655996 | 27.2257844 | 2.5139615  | 294.850711 |
| cg22876277 | 0.00290901 | 2.0936E+10 | 3360.3219  | 1.3044E+17 | cg27140083 | 0.00656719 | 2513192.38 | 60.9593218 | 1.0361E+11 |
| cg14816013 | 0.00291045 | 125.500158 | 5.21172624 | 3022.0869  | cg09250423 | 0.0065698  | 11.388439  | 1.97066987 | 65.8134298 |



|            |            |            |            |            |
|------------|------------|------------|------------|------------|
| cg05883874 | 0.00291059 | 11.016496  | 2.26986863 | 53.4670515 |
| cg07371589 | 0.00291518 | 5.77966975 | 1.82059255 | 18.3481924 |
| cg16451324 | 0.00291828 | 25.076211  | 3.0046186  | 209.283254 |
| cg10472567 | 0.00291841 | 28.1228158 | 3.12455588 | 253.121659 |
| cg10173186 | 0.00291928 | 16.7533958 | 2.61788962 | 107.214708 |
| cg19119531 | 0.00292225 | 2155149311 | 1535.07364 | 3.0257E+15 |
| cg06490988 | 0.00292492 | 9.18196317 | 2.1313444  | 39.5564638 |
| cg00411741 | 0.00292549 | 1567.8445  | 12.3176112 | 199562.752 |
| cg15645309 | 0.00292777 | 7.71696378 | 2.00830682 | 29.6526055 |
| cg15021670 | 0.0029279  | 20.2346319 | 2.79051784 | 146.725572 |
| cg20746096 | 0.00293389 | 4926818.56 | 191.780985 | 1.2657E+11 |
| cg07628705 | 0.00293882 | 23.1685919 | 2.9201548  | 183.820271 |
| cg10452206 | 0.00294275 | 133779005  | 589.130246 | 3.0378E+13 |
| cg14424070 | 0.00294593 | 8.29924026 | 2.05695204 | 33.48517   |
| cg04326808 | 0.00294737 | 12.809949  | 2.3847033  | 68.8114085 |
| cg13878456 | 0.00294831 | 90.7639585 | 4.64711283 | 1772.73427 |
| cg13975336 | 0.00294981 | 17681574.9 | 294.73436  | 1.0607E+12 |
| cg03011814 | 0.00295359 | 14207.4625 | 25.9726144 | 7771723.97 |
| cg09668408 | 0.00296084 | 1.1606E+13 | 28065.92   | 4.80E+21   |
| cg12610087 | 0.00296153 | 19.878249  | 2.7672149  | 142.79512  |
| cg19912332 | 0.00296419 | 2360945.33 | 147.69865  | 3.7739E+10 |
| cg21660960 | 0.002966   | 2298.83316 | 13.9349433 | 379236.123 |
| cg23133255 | 0.00296692 | 22.2764979 | 2.87552818 | 172.574334 |
| cg14615266 | 0.00296954 | 8.66160781 | 2.08468273 | 35.9879462 |
| cg22144668 | 0.00297388 | 1438866.33 | 124.393498 | 1.6643E+10 |
| cg26280499 | 0.00298441 | 0.02345968 | 0.00197072 | 0.27926679 |
| cg17126533 | 0.00299072 | 2964413949 | 1653.69158 | 5.314E+15  |
| cg10784298 | 0.00299924 | 110097.213 | 51.5413388 | 235178141  |
| cg07119315 | 0.00299965 | 6.00524521 | 1.83813276 | 19.61935   |
| cg15695648 | 0.00300391 | 203.125452 | 6.07374579 | 6793.16366 |

|            |            |            |            |            |
|------------|------------|------------|------------|------------|
| cg12457341 | 0.00657112 | 128780.348 | 26.6000502 | 623471681  |
| cg24287218 | 0.00657113 | 15.8335662 | 2.16024271 | 116.052617 |
| cg11683764 | 0.00657832 | 3886.33464 | 10.0137939 | 1508279.19 |
| cg19961545 | 0.00658767 | 12.7339718 | 2.03177307 | 79.8091289 |
| cg14986845 | 0.00659567 | 1424238739 | 354.38879  | 5.7238E+15 |
| cg13344867 | 0.00659858 | 3951612.72 | 68.7218853 | 2.2722E+11 |
| cg25154306 | 0.00659883 | 3063940.31 | 64.0180857 | 1.4664E+11 |
| cg22934878 | 0.00661068 | 0.04900865 | 0.00555997 | 0.43198948 |
| cg01799338 | 0.00661255 | 4587.27672 | 10.4472652 | 2014221.65 |
| cg12073353 | 0.00661482 | 280.190774 | 4.79785276 | 16362.9177 |
| cg20227763 | 0.00662328 | 411110.489 | 36.4376933 | 4638379065 |
| cg05682719 | 0.00662402 | 17.1045088 | 2.20284462 | 132.812009 |
| cg07626637 | 0.00662517 | 2.6778E+10 | 794.833083 | 9.0212E+17 |
| cg15376007 | 0.0066252  | 804003.224 | 43.8961509 | 1.4726E+10 |
| cg18154158 | 0.00663625 | 0.04475103 | 0.00474963 | 0.42164446 |
| cg01038207 | 0.00664792 | 678.496551 | 6.11903561 | 75233.6804 |
| cg15462247 | 0.00665211 | 8383.25713 | 12.2974679 | 5714916.36 |
| cg00506343 | 0.00666016 | 11.2804722 | 1.95972532 | 64.9320862 |
| cg07226281 | 0.0066635  | 44637.4008 | 19.5369522 | 101986099  |
| cg25451082 | 0.00667036 | 44.2582201 | 2.86295048 | 684.185795 |
| cg00699721 | 0.00667381 | 2.206E+11  | 1405.02474 | 3.4637E+19 |
| cg18552861 | 0.00667532 | 6.362244   | 1.67098992 | 24.2240532 |
| cg22810403 | 0.00667753 | 83.7454191 | 3.41584655 | 2053.1646  |
| cg00987461 | 0.00667959 | 6.67858181 | 1.69345871 | 26.3386728 |
| cg09449611 | 0.00668012 | 1991233.93 | 55.896782  | 7.0935E+10 |
| cg07484354 | 0.00669347 | 21.7332696 | 2.34792918 | 201.170892 |
| cg01176915 | 0.00669681 | 5545.06049 | 10.9078874 | 2818849.78 |
| cg06637618 | 0.00669712 | 46.4300867 | 2.89733566 | 744.046671 |
| cg18076651 | 0.00669794 | 2843.78661 | 9.06367199 | 892256.726 |
| cg13451356 | 0.00670017 | 56.5192053 | 3.05913119 | 1044.22477 |

|            |            |            |            |            |            |            |            |            |            |
|------------|------------|------------|------------|------------|------------|------------|------------|------------|------------|
| cg19206910 | 0.00301396 | 655505.551 | 94.0424769 | 4569079224 | cg16410706 | 0.00671892 | 9.64143756 | 1.87283223 | 49.6346211 |
| cg12914014 | 0.00301936 | 48.1198666 | 3.71994893 | 622.460578 | cg07797438 | 0.00671911 | 74898268.3 | 151.475207 | 3.7034E+13 |
| cg25551691 | 0.00302068 | 3754.26513 | 16.2983197 | 864782.806 | cg13001868 | 0.00672334 | 4.04231467 | 1.47208996 | 11.1000743 |
| cg05652528 | 0.00302252 | 0.00164302 | 2.37E-05   | 0.11374275 | cg02408311 | 0.00673245 | 0.09932324 | 0.01869087 | 0.52780339 |
| cg22149516 | 0.00302379 | 16.5338673 | 2.58864337 | 105.603102 | cg18273501 | 0.00673257 | 311.786981 | 4.89864554 | 19844.4898 |
| cg04077077 | 0.00302546 | 45.1032784 | 3.63724713 | 559.298185 | cg15628917 | 0.00673606 | 8.71279214 | 1.82015332 | 41.706787  |
| cg19170321 | 0.00302824 | 0.00147435 | 1.98E-05   | 0.1097338  | cg06856329 | 0.00674168 | 1.71E+20   | 394736.296 | 7.41E+34   |
| cg01016800 | 0.00303133 | 318.511565 | 7.05051656 | 14388.9623 | cg10771262 | 0.00674198 | 25.5706273 | 2.45110662 | 266.75991  |
| cg12019494 | 0.00303475 | 12.4839899 | 2.35196316 | 66.2637945 | cg24798540 | 0.00674329 | 29.5628084 | 2.55130954 | 342.553353 |
| cg20051715 | 0.00303688 | 55.8758271 | 3.90708632 | 799.088579 | cg16107907 | 0.00675481 | 176.35402  | 4.17773998 | 7444.39348 |
| cg03699566 | 0.0030474  | 9.03538035 | 2.10663538 | 38.7528372 | cg05217962 | 0.0067583  | 85.9964461 | 3.42481068 | 2159.35695 |
| cg26040261 | 0.00305014 | 3226.57602 | 15.3991921 | 676060.976 | cg10978355 | 0.00676047 | 8.49923794 | 1.80646013 | 39.988176  |
| cg06868247 | 0.00305394 | 207554900  | 651.834089 | 6.6089E+13 | cg03872783 | 0.00676262 | 7.74038115 | 1.76026855 | 34.0365681 |
| cg07182669 | 0.00305791 | 6.9264646  | 1.92448933 | 24.9291649 | cg06218124 | 0.00676451 | 217937.893 | 29.8491605 | 1591231532 |
| cg03315058 | 0.00305914 | 19.0118874 | 2.70778367 | 133.48624  | cg06500727 | 0.00677096 | 0.22599386 | 0.07701863 | 0.66312819 |
| cg16352928 | 0.00305922 | 13.298013  | 2.39940946 | 73.7002799 | cg26667761 | 0.00677336 | 578921.109 | 39.0382651 | 8585157399 |
| cg14542839 | 0.00306049 | 49.8368663 | 3.7507932  | 662.183466 | cg08493879 | 0.00677502 | 4349466707 | 458.863345 | 4.1228E+16 |
| cg11537619 | 0.0030643  | 36.6896779 | 3.38069122 | 398.182613 | cg27131958 | 0.00677903 | 304.555554 | 4.85000015 | 19124.5531 |
| cg01111358 | 0.00306504 | 11.2405287 | 2.26608312 | 55.7567746 | cg15680989 | 0.00678139 | 6596.45817 | 11.3343336 | 3839066.52 |
| cg10510891 | 0.00306608 | 2534114861 | 1510.97821 | 4.2501E+15 | cg04064094 | 0.00678903 | 24410.8403 | 16.2494887 | 36671253.9 |
| cg19224164 | 0.00306614 | 11.8133284 | 2.30434523 | 60.5615535 | cg09920522 | 0.0067895  | 5.0186E+10 | 897.365825 | 2.8066E+18 |
| cg20225999 | 0.00306788 | 11.4514643 | 2.28001848 | 57.5153387 | cg00672333 | 0.00679417 | 289.554575 | 4.77746508 | 17549.4431 |
| cg26152485 | 0.0030751  | 28.9273466 | 3.11706164 | 268.455193 | cg00099023 | 0.00679919 | 4574758.28 | 68.7345258 | 3.0448E+11 |
| cg04077706 | 0.00307728 | 31.912511  | 3.22168634 | 316.110339 | cg00826842 | 0.00680382 | 257206.259 | 31.0476036 | 2130762187 |
| cg20215290 | 0.00308245 | 0.02734427 | 0.0025213  | 0.29655652 | cg16446585 | 0.00680531 | 0.02313068 | 0.00151169 | 0.35392692 |
| cg16410706 | 0.00308337 | 9.01931288 | 2.10162971 | 38.7071063 | cg00690402 | 0.00681304 | 33.6713976 | 2.63632453 | 430.05442  |
| cg14226064 | 0.00309119 | 11.9869405 | 2.31251547 | 62.134392  | cg05134500 | 0.00681322 | 739.087384 | 6.17684387 | 88435.1575 |
| cg26435178 | 0.0030921  | 11.095583  | 2.25287373 | 54.6466319 | cg03771878 | 0.00683084 | 2968.3869  | 9.04514005 | 974149.737 |
| cg18773260 | 0.00309461 | 33.8271597 | 3.28125029 | 348.731927 | cg05775779 | 0.00683485 | 0.01548749 | 0.00075577 | 0.31737438 |
| cg02009255 | 0.00309762 | 3507793.9  | 161.48567  | 7.6196E+10 | cg09697857 | 0.00683521 | 10211.4834 | 12.7048909 | 8207421.42 |

|            |            |            |            |            |            |            |            |            |            |
|------------|------------|------------|------------|------------|------------|------------|------------|------------|------------|
| cg05113000 | 0.00309881 | 8017153.74 | 213.336476 | 3.0128E+11 | cg05552569 | 0.00683737 | 150.709134 | 3.9785663  | 5708.9015  |
| cg10896623 | 0.00309966 | 906.557587 | 9.94532043 | 82636.5187 | cg16421621 | 0.00684178 | 127788392  | 170.438577 | 9.5811E+13 |
| cg08542090 | 0.00310221 | 23.2365247 | 2.88916957 | 186.882794 | cg14729962 | 0.00684383 | 12.2442306 | 1.99277587 | 75.2323362 |
| cg21700166 | 0.00310222 | 425.133412 | 7.7007142  | 23470.3448 | cg27540189 | 0.0068585  | 259.797674 | 4.61508434 | 14624.8317 |
| cg00791920 | 0.00310272 | 0.0018668  | 2.90E-05   | 0.12012833 | cg12651953 | 0.00687128 | 0.10152516 | 0.01933029 | 0.53322305 |
| cg11808250 | 0.00310705 | 1596876.38 | 123.460763 | 2.0654E+10 | cg27071152 | 0.00687492 | 7.4188958  | 1.7346569  | 31.7296262 |
| cg13342722 | 0.00310824 | 24.1282087 | 2.92484718 | 199.043034 | cg23299109 | 0.00687669 | 19.3641387 | 2.25789234 | 166.070747 |
| cg02519208 | 0.00311434 | 17.0263039 | 2.59951183 | 111.519024 | cg11432962 | 0.00687832 | 13.7755221 | 2.0560553  | 92.295674  |
| cg13249789 | 0.00312871 | 3793.39936 | 16.0326242 | 897537.333 | cg20313392 | 0.00688272 | 25595.2607 | 16.2607709 | 40288211.1 |
| cg09249682 | 0.00313012 | 2142815.93 | 135.315879 | 3.3933E+10 | cg17567560 | 0.00688664 | 6.05262402 | 1.63983122 | 22.340261  |
| cg02373393 | 0.00313999 | 11066206.8 | 234.342694 | 5.2257E+11 | cg27367469 | 0.00688687 | 31.862861  | 2.58789357 | 392.304354 |
| cg03339560 | 0.00314036 | 35.6145589 | 3.32667143 | 381.281059 | cg09686308 | 0.00689097 | 117.479167 | 3.70254213 | 3727.5348  |
| cg01874730 | 0.00314122 | 33.0341772 | 3.2433374  | 336.461098 | cg12582022 | 0.00689854 | 12929650.7 | 89.6292592 | 1.8652E+12 |
| cg06517984 | 0.00314561 | 0.00870674 | 0.00037373 | 0.20283822 | cg21784254 | 0.00690355 | 14.2802763 | 2.07468533 | 98.292636  |
| cg20362242 | 0.00314697 | 51.1241998 | 3.75473538 | 696.10333  | cg14315558 | 0.00690892 | 4.1216407  | 1.47496537 | 11.5175057 |
| cg23239150 | 0.00314763 | 0.03382197 | 0.00357256 | 0.32019768 | cg26603598 | 0.00690972 | 0.0743722  | 0.01128513 | 0.49013396 |
| cg13813874 | 0.00314902 | 4219747.96 | 168.912411 | 1.0542E+11 | cg17339521 | 0.00691588 | 154.476657 | 3.98520165 | 5987.91221 |
| cg24326661 | 0.00315112 | 1.3469E+16 | 264560.33  | 6.86E+26   | cg08774802 | 0.00691935 | 4310.48795 | 9.92801992 | 1871501.72 |
| cg03923535 | 0.00315135 | 0.0166048  | 0.00109345 | 0.25215597 | cg11159295 | 0.00692405 | 2270.59873 | 8.32347379 | 619407.08  |
| cg17222164 | 0.00315898 | 7.33298573 | 1.95321112 | 27.5303982 | cg18505959 | 0.00692693 | 16.1773739 | 2.14514151 | 122.000076 |
| cg19620294 | 0.0031591  | 10.1175037 | 2.17630209 | 47.0356948 | cg21000493 | 0.00693139 | 28308981.7 | 110.337957 | 7.2631E+12 |
| cg09798090 | 0.0031599  | 2627.46267 | 14.0913813 | 489913.653 | cg21787965 | 0.00693286 | 6.35594687 | 1.66017113 | 24.3336725 |
| cg11401682 | 0.00315999 | 70575.4825 | 42.5718446 | 116999834  | cg14611402 | 0.00694018 | 38.0951555 | 2.71124899 | 535.266542 |
| cg06069457 | 0.00316034 | 0.08989216 | 0.0181543  | 0.44510664 | cg17475987 | 0.0069468  | 491.867443 | 5.46204973 | 44293.5516 |
| cg19724344 | 0.00316224 | 1299.15961 | 11.1178502 | 151811.337 | cg10561067 | 0.00694916 | 19.5151378 | 2.2564281  | 168.780297 |
| cg22810403 | 0.00316475 | 68.1323752 | 4.12862559 | 1124.35009 | cg04079538 | 0.00695067 | 304.837018 | 4.78978753 | 19400.7787 |
| cg21870662 | 0.00316586 | 5958.42032 | 18.532653  | 1915687.55 | cg26145223 | 0.00695292 | 1571.24109 | 7.50357822 | 329016.171 |
| cg03781098 | 0.00317049 | 11.008426  | 2.23755723 | 54.1597063 | cg00212119 | 0.00695632 | 0.14513191 | 0.03573012 | 0.58951028 |
| cg03075725 | 0.0031775  | 684960.956 | 90.8891159 | 5162020854 | cg02286091 | 0.00696338 | 17.6308591 | 2.19338703 | 141.720175 |
| cg24174307 | 0.00317801 | 323.807063 | 6.95746526 | 15070.2893 | cg17253939 | 0.00696791 | 2.3546E+11 | 1293.96966 | 4.2846E+19 |

|            |            |            |            |            |            |            |            |            |            |
|------------|------------|------------|------------|------------|------------|------------|------------|------------|------------|
| cg18506672 | 0.00318803 | 22.0926713 | 2.8238034  | 172.847064 | cg26329692 | 0.0069692  | 181675320  | 181.978347 | 1.8137E+14 |
| cg08644993 | 0.00319452 | 978.152298 | 10.0577267 | 95129.0433 | cg11685223 | 0.00697031 | 23.3765376 | 2.36877889 | 230.693761 |
| cg25754252 | 0.0031957  | 927899.841 | 100.088284 | 8602386648 | cg06710082 | 0.00698094 | 6.42050229 | 1.6628614  | 24.7903101 |
| cg10925417 | 0.00319811 | 0.00091369 | 8.71E-06   | 0.09580342 | cg06310422 | 0.00698233 | 116.370018 | 3.67227042 | 3687.63179 |
| cg00229387 | 0.00320084 | 193.011131 | 5.83311753 | 6386.51571 | cg00420348 | 0.00698332 | 6.65854182 | 1.6794019  | 26.3999815 |
| cg26863085 | 0.00320354 | 0.00095604 | 9.39E-06   | 0.09734938 | cg11691214 | 0.0069852  | 0.00021725 | 4.74E-07   | 0.09963752 |
| cg16685860 | 0.00320763 | 382250579  | 749.348002 | 1.9499E+14 | cg04781638 | 0.00698721 | 28.9372603 | 2.50937437 | 333.694742 |
| cg18661237 | 0.00321607 | 582.589802 | 8.42867704 | 40268.5826 | cg13466546 | 0.00698823 | 603.475611 | 5.75707355 | 63258.3222 |
| cg01729739 | 0.00321792 | 3766957.97 | 158.919804 | 8.929E+10  | cg12260435 | 0.00698934 | 24.9671566 | 2.40993494 | 258.662132 |
| cg04789747 | 0.00321795 | 7464791931 | 2017.36289 | 2.7622E+16 | cg22783598 | 0.00699273 | 250664542  | 197.576195 | 3.1802E+14 |
| cg10510742 | 0.00321918 | 81.1500112 | 4.35554967 | 1511.93875 | cg20202112 | 0.00699901 | 14.4108714 | 2.07306512 | 100.17689  |
| cg12783491 | 0.00321977 | 3515.66749 | 15.3748492 | 803904.983 | cg15834388 | 0.00700268 | 48.372745  | 2.88561854 | 810.891123 |
| cg01950845 | 0.00322142 | 7.00139033 | 1.91797956 | 25.557867  | cg14780540 | 0.00700891 | 17613.2902 | 14.4424207 | 21480332   |
| cg10530568 | 0.00322701 | 7.61108806 | 1.97184394 | 29.3779139 | cg01852715 | 0.00701821 | 2607.68746 | 8.56355398 | 794066.8   |
| cg01618834 | 0.00323379 | 536.251102 | 8.17827085 | 35162.1082 | cg07273125 | 0.00701847 | 211.363529 | 4.31257247 | 10359.1398 |
| cg02704345 | 0.00323447 | 421603.192 | 75.9984285 | 2338854301 | cg20991612 | 0.00702087 | 27.004079  | 2.45888483 | 296.56545  |
| cg00685025 | 0.00323588 | 192230765  | 588.323079 | 6.281E+13  | cg13405887 | 0.00702676 | 5.1551585  | 1.56447114 | 16.9869923 |
| cg10099601 | 0.0032369  | 11.4030308 | 2.25621859 | 57.6314333 | cg05799507 | 0.00702743 | 11.0028117 | 1.92403345 | 62.9208729 |
| cg06722639 | 0.00324    | 7.04961847 | 1.92088146 | 25.8720393 | cg16142306 | 0.00702772 | 7.9619013  | 1.7614579  | 35.9882984 |
| cg08009622 | 0.00324258 | 9.81285777 | 2.14513015 | 44.8887344 | cg01969023 | 0.00702903 | 0.04682382 | 0.00505497 | 0.43372579 |
| cg11705208 | 0.00324272 | 33.215     | 3.22417597 | 342.176182 | cg14753355 | 0.00703057 | 13.6160003 | 2.03902056 | 90.9237832 |
| cg00149397 | 0.00325343 | 2.1227E+14 | 60902.1565 | 7.40E+23   | cg14610403 | 0.00703294 | 9.82301501 | 1.86509336 | 51.7355463 |
| cg17607368 | 0.00325952 | 12014182.5 | 230.897284 | 6.2513E+11 | cg05193369 | 0.00703806 | 42.6213599 | 2.78280258 | 652.788066 |
| cg20331595 | 0.00326848 | 859.190703 | 9.52629258 | 77491.706  | cg09397246 | 0.00704078 | 11.0587086 | 1.92590568 | 63.5000127 |
| cg21392341 | 0.00327289 | 7.35392306 | 1.94545712 | 27.7981888 | cg10382221 | 0.00704256 | 14.0670533 | 2.05639918 | 96.2274203 |
| cg08661338 | 0.00327798 | 0.07321788 | 0.0128177  | 0.4182388  | cg20368841 | 0.00704658 | 24242.19   | 15.6826366 | 37473531.4 |
| cg22496559 | 0.00327829 | 0.15035013 | 0.04251909 | 0.53164739 | cg19690901 | 0.00705681 | 275770.861 | 30.3817419 | 2503133880 |
| cg16321323 | 0.00327842 | 0.00361321 | 8.51E-05   | 0.15337017 | cg04656882 | 0.00706075 | 26946.5815 | 16.1116745 | 45067833   |
| cg01850179 | 0.00328106 | 20.4481873 | 2.73483295 | 152.88991  | cg01716223 | 0.00706274 | 3647.41487 | 9.34141622 | 1424156.14 |
| cg14957497 | 0.0032815  | 166817.85  | 55.0656669 | 505363810  | cg26232870 | 0.0070688  | 106.156658 | 3.56274305 | 3163.07856 |

|            |            |            |            |            |            |            |            |            |            |
|------------|------------|------------|------------|------------|------------|------------|------------|------------|------------|
| cg01392273 | 0.00328256 | 4172590.14 | 160.998161 | 1.0814E+11 | cg10996039 | 0.00707031 | 23.7795918 | 2.37025365 | 238.568976 |
| cg27074720 | 0.00328599 | 800001.076 | 92.7428698 | 6900818618 | cg11168687 | 0.00707157 | 14.876282  | 2.08592011 | 106.094076 |
| cg18928737 | 0.00328907 | 1628.99993 | 11.7544456 | 225756.352 | cg26827247 | 0.00708188 | 6.77154641 | 1.68308781 | 27.2438792 |
| cg20268054 | 0.00329319 | 0.0465349  | 0.00601634 | 0.35993587 | cg08554302 | 0.00708215 | 758739.472 | 39.8561377 | 1.4444E+10 |
| cg03110368 | 0.00330342 | 9.08499496 | 2.08457412 | 39.5942426 | cg06722639 | 0.00709326 | 8.55900737 | 1.79334333 | 40.8491814 |
| cg10996039 | 0.00330787 | 17.4373122 | 2.58916295 | 117.435582 | cg22220806 | 0.00709659 | 0.07075231 | 0.01028863 | 0.48654559 |
| cg06799455 | 0.00331474 | 6560.92073 | 18.6085491 | 2313220.69 | cg06993761 | 0.00710397 | 229867984  | 187.750656 | 2.8143E+14 |
| cg07011163 | 0.00331725 | 17.1571802 | 2.57378595 | 114.371917 | cg01841828 | 0.00710653 | 60759.9265 | 19.9785862 | 184786282  |
| cg14383549 | 0.00331788 | 20.2436995 | 2.7192547  | 150.705769 | cg17715556 | 0.00710968 | 15.6023043 | 2.11035295 | 115.351274 |
| cg12415590 | 0.0033199  | 102869.296 | 46.4286318 | 227921685  | cg24058604 | 0.0071121  | 7.62226003 | 1.73683118 | 33.4510623 |
| cg01016119 | 0.00332295 | 9.8305665  | 2.13800088 | 45.2011216 | cg07234865 | 0.00711271 | 10.314368  | 1.88562012 | 56.4197347 |
| cg05981247 | 0.00332316 | 3319138.82 | 147.248872 | 7.4817E+10 | cg00868652 | 0.00711329 | 19.0252661 | 2.2269646  | 162.535476 |
| cg11393995 | 0.00333395 | 2151387.85 | 127.056464 | 3.6428E+10 | cg22837406 | 0.007115   | 28655.5772 | 16.268301  | 50474976.2 |
| cg02786012 | 0.0033347  | 10.3432772 | 2.17318217 | 49.2289074 | cg22402467 | 0.00711635 | 23.651268  | 2.36238599 | 236.787079 |
| cg05562419 | 0.00333742 | 18844.5434 | 26.3077329 | 13498571.5 | cg27430662 | 0.00711981 | 14.1095491 | 2.05274347 | 96.9821012 |
| cg02990672 | 0.00334044 | 900.67805  | 9.57694529 | 84705.6055 | cg21184629 | 0.0071234  | 10003.1927 | 12.2094795 | 8195588.1  |
| cg16856874 | 0.00334158 | 122.54891  | 4.93727719 | 3041.80518 | cg04797936 | 0.00712986 | 11593729.3 | 82.8939921 | 1.6215E+12 |
| cg10501305 | 0.00334363 | 2768.46258 | 13.8980008 | 551473.925 | cg08446657 | 0.00714179 | 61406.6651 | 19.9376865 | 189128188  |
| cg24701966 | 0.00335256 | 3428866.07 | 147.463072 | 7.9729E+10 | cg19227170 | 0.00714553 | 57.0730835 | 2.99687443 | 1086.91136 |
| cg04401436 | 0.00335542 | 2945493.62 | 140.08568  | 6.1933E+10 | cg09024228 | 0.0071594  | 202.382442 | 4.22139056 | 9702.64477 |
| cg09674867 | 0.00335669 | 14.2983105 | 2.41701558 | 84.5843468 | cg23843362 | 0.00716003 | 171559.183 | 26.277266  | 1120076693 |
| cg11199172 | 0.00335758 | 18.0981907 | 2.61343572 | 125.330998 | cg21316772 | 0.00716822 | 65.2036764 | 3.1034545  | 1369.93129 |
| cg05676635 | 0.0033621  | 2449219776 | 1299.72688 | 4.6153E+15 | cg13063614 | 0.00716843 | 42.390741  | 2.7615027  | 650.723581 |
| cg00289084 | 0.00336871 | 7.1943E+10 | 3973.64787 | 1.3025E+18 | cg25707005 | 0.00717389 | 328851950  | 203.391085 | 5.317E+14  |
| cg15227911 | 0.00336886 | 1054.53206 | 10.0498915 | 110651.728 | cg03262773 | 0.00717705 | 563.244334 | 5.56419024 | 57015.3366 |
| cg02706018 | 0.00336904 | 20.6919719 | 2.73017806 | 156.824094 | cg14777244 | 0.00719063 | 337.858504 | 4.83972067 | 23585.735  |
| cg16358679 | 0.00337273 | 12.559888  | 2.31329335 | 68.193161  | cg17176470 | 0.00719162 | 29.3805947 | 2.49778528 | 345.593896 |
| cg18949300 | 0.00337312 | 10.09453   | 2.15164417 | 47.3589164 | cg07119315 | 0.00719362 | 6.83067373 | 1.6824964  | 27.7314731 |
| cg27427051 | 0.00337471 | 445729.226 | 74.47415   | 2667698020 | cg08716348 | 0.00720019 | 35426.5698 | 17.0404227 | 73650863.5 |
| cg07707586 | 0.003375   | 22.8588531 | 2.82071415 | 185.246409 | cg01480708 | 0.00720034 | 38.2927176 | 2.68249249 | 546.630505 |

|            |            |            |            |            |            |            |            |            |            |
|------------|------------|------------|------------|------------|------------|------------|------------|------------|------------|
| cg11420031 | 0.00338009 | 12666.4818 | 22.8605712 | 7018186.93 | cg06641959 | 0.00720251 | 704889174  | 248.246639 | 2.0015E+15 |
| cg04377289 | 0.00338225 | 8.13126949 | 2.00201314 | 33.0255292 | cg05124756 | 0.00721787 | 67676.6541 | 20.2535583 | 226139498  |
| cg15535174 | 0.00338521 | 69.4258992 | 4.0723325  | 1183.58594 | cg20345923 | 0.00721884 | 0.0876547  | 0.01484184 | 0.51768146 |
| cg24089133 | 0.00338777 | 33.5523192 | 3.20022422 | 351.774765 | cg15557486 | 0.00721957 | 2457686.94 | 53.4965596 | 1.1291E+11 |
| cg03381111 | 0.00339061 | 0.05279741 | 0.00738081 | 0.3776777  | cg10082589 | 0.00722173 | 9.17744637 | 1.82113943 | 46.2488049 |
| cg06080793 | 0.00339189 | 8.41982332 | 2.02440006 | 35.0194738 | cg14054928 | 0.00722182 | 11.23452   | 1.92350805 | 65.6167988 |
| cg27028281 | 0.00339331 | 9.58678491 | 2.11313369 | 43.4929628 | cg13325330 | 0.00722418 | 261190.002 | 29.1547366 | 2339935974 |
| cg05256043 | 0.00339987 | 14.8880659 | 2.44365931 | 90.7059773 | cg20183756 | 0.00722728 | 0.03994658 | 0.00381114 | 0.41870092 |
| cg20533957 | 0.00340051 | 0.08989483 | 0.01793158 | 0.45066197 | cg01959640 | 0.00722787 | 218.01464  | 4.28748409 | 11085.8448 |
| cg26031954 | 0.00340501 | 6.75662487 | 1.88118769 | 24.2676368 | cg02426376 | 0.00723364 | 768.266856 | 6.02393773 | 97981.4182 |
| cg03099482 | 0.00340681 | 66.2547675 | 4.00218039 | 1096.82568 | cg23902823 | 0.00723499 | 154.199431 | 3.9025287  | 6092.83527 |
| cg23061046 | 0.00340705 | 10.2824107 | 2.1612553  | 48.9197038 | cg23963591 | 0.00723511 | 22.5417551 | 2.32088282 | 218.938551 |
| cg01969023 | 0.00341622 | 0.05284683 | 0.00738073 | 0.37838893 | cg04396550 | 0.00724017 | 1365.67911 | 7.0331176  | 265185.304 |
| cg07410044 | 0.00342295 | 138192977  | 489.118358 | 3.9044E+13 | cg11731890 | 0.00724031 | 6.25443289 | 1.64105355 | 23.8370837 |
| cg20215212 | 0.00342306 | 102.237997 | 4.61233854 | 2266.22739 | cg07664976 | 0.00724087 | 0.06036867 | 0.00778087 | 0.46837637 |
| cg07664976 | 0.00342438 | 0.07343738 | 0.01277831 | 0.42204719 | cg27410337 | 0.0072522  | 19.8003032 | 2.23952336 | 175.060468 |
| cg14558114 | 0.00342715 | 13.3684989 | 2.35467681 | 75.8986376 | cg15132559 | 0.0072584  | 14715.3794 | 13.3397847 | 16232825   |
| cg17597901 | 0.00343022 | 23.81293   | 2.84876675 | 199.053024 | cg11764177 | 0.0072607  | 224.553203 | 4.31225383 | 11693.2219 |
| cg14693391 | 0.00343147 | 9.35833663 | 2.09260885 | 41.8513304 | cg04408790 | 0.0072714  | 1213287743 | 282.401342 | 5.2127E+15 |
| cg09456081 | 0.00343224 | 2.68E+17   | 568147.031 | 1.26E+29   | cg26152485 | 0.00727407 | 42.090231  | 2.74253538 | 645.967072 |
| cg03318314 | 0.0034428  | 13.2222176 | 2.34417072 | 74.5794817 | cg15467112 | 0.00727922 | 54.7381151 | 2.94322295 | 1018.02048 |
| cg01698298 | 0.00344331 | 6.17984647 | 1.82383392 | 20.9396821 | cg26466921 | 0.00728068 | 168.153705 | 3.98327694 | 7098.59463 |
| cg19768950 | 0.0034447  | 230.306112 | 6.01701562 | 8815.15165 | cg11298343 | 0.00728575 | 22.07001   | 2.30313258 | 211.488191 |
| cg25547520 | 0.00345355 | 9.0921828  | 2.07067656 | 39.9230811 | cg01940297 | 0.00728902 | 8.95197445 | 1.80559132 | 44.383159  |
| cg03135127 | 0.0034545  | 3660.49305 | 14.9614934 | 895579.673 | cg00813746 | 0.00729048 | 7.39794762 | 1.71506356 | 31.9111375 |
| cg08375849 | 0.00345639 | 123.150882 | 4.8885556  | 3102.37644 | cg18098750 | 0.00729396 | 15.4200512 | 2.09031834 | 113.752042 |
| cg26570179 | 0.00346172 | 5.06713336 | 1.70714423 | 15.0402292 | cg00228891 | 0.00730391 | 52.2296442 | 2.90267909 | 939.799284 |
| cg02595823 | 0.00346902 | 11.1622425 | 2.21387035 | 56.2795641 | cg17960769 | 0.00730485 | 1061.27548 | 6.53294029 | 172404.094 |
| cg04189328 | 0.00347299 | 104.963289 | 4.63029644 | 2379.39238 | cg03394309 | 0.00730877 | 25.7686135 | 2.3991425  | 276.77449  |
| cg26495758 | 0.00347398 | 3785945.69 | 146.664044 | 9.7729E+10 | cg27316993 | 0.00731193 | 3.2842E+12 | 2347.56195 | 4.59E+21   |

|            |            |            |            |            |            |            |            |            |            |
|------------|------------|------------|------------|------------|------------|------------|------------|------------|------------|
| cg06329345 | 0.00347423 | 704.368071 | 8.66607193 | 57250.2032 | cg19801120 | 0.00731561 | 199.007059 | 4.158813   | 9522.86377 |
| cg05951221 | 0.00347545 | 19.5966148 | 2.66380017 | 144.16521  | cg08343943 | 0.00732418 | 131550.985 | 23.8653432 | 725137760  |
| cg05022363 | 0.00347604 | 1393164.54 | 105.458495 | 1.8404E+10 | cg07221635 | 0.00732445 | 127.868307 | 3.68988745 | 4431.11184 |
| cg11009335 | 0.00347672 | 38932758.2 | 315.655349 | 4.8019E+12 | cg06020661 | 0.00733083 | 1192.70108 | 6.72623111 | 211490.782 |
| cg26088994 | 0.00348355 | 2774931.46 | 132.014898 | 5.8329E+10 | cg14015706 | 0.00733729 | 5.32150606 | 1.56779264 | 18.0626098 |
| cg18431813 | 0.0034841  | 459907.526 | 73.0552333 | 2895274200 | cg27207079 | 0.00734019 | 21.148968  | 2.27210364 | 196.85671  |
| cg05096838 | 0.00349204 | 16435.4217 | 24.3655931 | 11086251.2 | cg03259273 | 0.00734082 | 2148246.47 | 50.4573988 | 9.1463E+10 |
| cg11142489 | 0.00349209 | 18.7260654 | 2.62161391 | 133.759408 | cg27143605 | 0.0073415  | 3826.83972 | 9.1944159  | 1592782.23 |
| cg17202086 | 0.00349242 | 7.35755323 | 1.92798757 | 28.0777689 | cg17213699 | 0.00734296 | 8.06105344 | 1.75281933 | 37.0720368 |
| cg07064711 | 0.00349613 | 25.3407649 | 2.89512553 | 221.805362 | cg22773661 | 0.00734575 | 3.94189802 | 1.44600572 | 10.7458496 |
| cg00082497 | 0.00349863 | 25.4402289 | 2.89837782 | 223.29913  | cg06727269 | 0.00735246 | 41594744.2 | 111.668467 | 1.5493E+13 |
| cg19659689 | 0.00350433 | 1087.22929 | 9.95475261 | 118744.039 | cg03198733 | 0.00735416 | 19.0503934 | 2.20800478 | 164.364448 |
| cg11932205 | 0.00350654 | 0.10304283 | 0.02240832 | 0.47383398 | cg26572163 | 0.00736448 | 145211.674 | 24.3629853 | 865510933  |
| cg24684576 | 0.00350849 | 50.1649381 | 3.62053113 | 695.069569 | cg00289084 | 0.00737213 | 5.5635E+11 | 1426.20338 | 2.17E+20   |
| cg08449860 | 0.00351443 | 824.905177 | 9.07846239 | 74954.1631 | cg13300282 | 0.00737877 | 178.502394 | 4.02241915 | 7921.37848 |
| cg25658385 | 0.003517   | 19.8627791 | 2.66886351 | 147.826965 | cg06490988 | 0.0073808  | 9.03424914 | 1.80550811 | 45.2048135 |
| cg00334257 | 0.0035217  | 1.0485E+11 | 4154.60804 | 2.6463E+18 | cg00520042 | 0.00738543 | 95.3482613 | 3.39791672 | 2675.54848 |
| cg22492271 | 0.00352311 | 0.16114568 | 0.04728446 | 0.54918523 | cg13085065 | 0.0073893  | 2.0918E+14 | 6961.31492 | 6.29E+24   |
| cg16751451 | 0.00352681 | 12.9875339 | 2.32007733 | 72.7027652 | cg25283841 | 0.00738972 | 15764815.1 | 85.3789116 | 2.9109E+12 |
| cg11931463 | 0.00352897 | 24.3444979 | 2.85107877 | 207.870292 | cg27334900 | 0.00739446 | 39.5432202 | 2.68193135 | 583.037394 |
| cg11802553 | 0.00353543 | 42.4650078 | 3.42056142 | 527.187401 | cg08948823 | 0.00739547 | 2228991.67 | 50.458186  | 9.8466E+10 |
| cg12899201 | 0.00353582 | 4340145.15 | 150.476389 | 1.2518E+11 | cg13031167 | 0.00739579 | 162.426689 | 3.91758238 | 6734.3649  |
| cg26231243 | 0.00353963 | 45422571.4 | 324.650827 | 6.3552E+12 | cg20355694 | 0.00739864 | 752472.293 | 37.686543  | 1.5024E+10 |
| cg04304033 | 0.00354338 | 657295.058 | 80.8452011 | 5344000479 | cg26846647 | 0.00740713 | 7.1031E+12 | 2790.3128  | 1.81E+22   |
| cg24004745 | 0.00354378 | 1.5198E+10 | 2180.42349 | 1.0593E+17 | cg05007549 | 0.0074176  | 20.5629068 | 2.24846672 | 188.05399  |
| cg05583848 | 0.00354543 | 13.1948527 | 2.32989326 | 74.7262293 | cg12810402 | 0.00742036 | 3900.92575 | 9.16759328 | 1659892.76 |
| cg18129755 | 0.00354572 | 60.1119588 | 3.83036451 | 943.369119 | cg19104830 | 0.00742255 | 299779.471 | 29.333543  | 3063650765 |
| cg27200446 | 0.00354588 | 4.32723096 | 1.61652414 | 11.5834507 | cg22821834 | 0.00742873 | 12.3719809 | 1.96158364 | 78.031804  |
| cg01667978 | 0.00355285 | 2150.36094 | 12.3622286 | 374046.809 | cg04381393 | 0.00743512 | 3.75E-05   | 2.15E-08   | 0.06527999 |
| cg03094905 | 0.00356662 | 21391.4196 | 26.173145  | 17483295.6 | cg21282452 | 0.00743746 | 51.5795447 | 2.87407459 | 925.671673 |

|            |            |            |            |            |            |            |            |            |            |
|------------|------------|------------|------------|------------|------------|------------|------------|------------|------------|
| cg11197945 | 0.00356839 | 17.5999257 | 2.5572597  | 121.128639 | cg10530568 | 0.00743755 | 9.08139948 | 1.80523801 | 45.6847331 |
| cg02067788 | 0.00357235 | 764047.256 | 84.2630372 | 6927927456 | cg01236148 | 0.00743808 | 22.5634019 | 2.3032958  | 221.034183 |
| cg01239651 | 0.00357605 | 25.9399894 | 2.90207717 | 231.862563 | cg18952098 | 0.0074384  | 5685.82733 | 10.1219398 | 3193916.67 |
| cg08724901 | 0.00358106 | 100427.573 | 43.2819084 | 233023401  | cg22502206 | 0.00744456 | 5975.36329 | 10.2506662 | 3483184.95 |
| cg13686104 | 0.00358202 | 6252.26057 | 17.4486627 | 2240329.98 | cg05226740 | 0.00744913 | 15.6426715 | 2.08733743 | 117.227415 |
| cg13430298 | 0.00358246 | 96731026.5 | 409.423985 | 2.2854E+13 | cg09974990 | 0.00745737 | 9893396562 | 471.736331 | 2.0749E+17 |
| cg07461318 | 0.00358274 | 668.939825 | 8.39849314 | 53281.0448 | cg13934625 | 0.00746209 | 15.1939851 | 2.07024619 | 111.511947 |
| cg10552964 | 0.00358297 | 0.02519558 | 0.0021163  | 0.29996519 | cg22712329 | 0.00746264 | 59153.6606 | 18.8872773 | 185265219  |
| cg12085570 | 0.00358509 | 12.8449889 | 2.30473661 | 71.5889779 | cg01874730 | 0.00746813 | 38.3503909 | 2.65118495 | 554.752878 |
| cg13116840 | 0.00358775 | 36642261.4 | 297.483286 | 4.5134E+12 | cg08278489 | 0.00747238 | 12.3923463 | 1.95979557 | 78.3603401 |
| cg15448245 | 0.00359348 | 77.6719181 | 4.14866722 | 1454.18433 | cg04994773 | 0.00747757 | 14.7698434 | 2.05357765 | 106.228402 |
| cg08870042 | 0.00359474 | 13.4628852 | 2.33924399 | 77.481989  | cg09904140 | 0.00747817 | 42.117654  | 2.71718849 | 652.84274  |
| cg18105529 | 0.00359542 | 41.131597  | 3.36973017 | 502.060457 | cg20272205 | 0.00748534 | 31.8537143 | 2.52098537 | 402.485125 |
| cg24641522 | 0.00359956 | 18.2396444 | 2.5826164  | 128.816897 | cg02102829 | 0.00749284 | 28568834.5 | 97.985332  | 8.3296E+12 |
| cg19408398 | 0.00360614 | 0.0582966  | 0.00859947 | 0.39519774 | cg05639912 | 0.00749305 | 10.2063561 | 1.85962352 | 56.0165555 |
| cg03363417 | 0.00360963 | 0.04238805 | 0.00504409 | 0.35620843 | cg17365504 | 0.00749549 | 1.1604E+18 | 66639.0491 | 2.02E+31   |
| cg00541544 | 0.00361225 | 23.4852162 | 2.80274157 | 196.791379 | cg26668837 | 0.00749615 | 14.51316   | 2.04273213 | 103.112793 |
| cg13916953 | 0.00361668 | 43549818   | 311.570067 | 6.0872E+12 | cg20470734 | 0.00751094 | 0.12309949 | 0.02650121 | 0.57180352 |
| cg05864627 | 0.00361738 | 0.03263421 | 0.00325461 | 0.32722504 | cg22289434 | 0.00751586 | 11.3512951 | 1.91188335 | 67.3952736 |
| cg06811166 | 0.00361992 | 41560818.5 | 306.502887 | 5.6355E+12 | cg25345578 | 0.00751726 | 0.07218175 | 0.01050461 | 0.49599209 |
| cg21535580 | 0.00362095 | 21.3449537 | 2.71519822 | 167.798817 | cg27109877 | 0.00751763 | 21.9370222 | 2.27911268 | 211.149254 |
| cg25353281 | 0.00362271 | 7.48300672 | 1.92847887 | 29.0360399 | cg23460835 | 0.00751916 | 7.15201855 | 1.69007888 | 30.2656699 |
| cg06059849 | 0.00362464 | 10.719731  | 2.16827247 | 52.9973208 | cg25163015 | 0.00753851 | 17402.3301 | 13.4933591 | 22443714.1 |
| cg23717805 | 0.00362697 | 347209658  | 611.09218  | 1.9728E+14 | cg12850793 | 0.00754487 | 39647133.6 | 105.761902 | 1.4863E+13 |
| cg04131468 | 0.00362937 | 14.0100804 | 2.36557215 | 82.974579  | cg20215290 | 0.00754508 | 0.02270823 | 0.00141355 | 0.36480061 |
| cg08104202 | 0.00362974 | 6.82951753 | 1.87131978 | 24.9248205 | cg26931437 | 0.00754932 | 64210444.2 | 120.141372 | 3.4318E+13 |
| cg07881273 | 0.00363157 | 7.5172E+10 | 3523.55184 | 1.6037E+18 | cg09285418 | 0.00755366 | 25.2519399 | 2.36293378 | 269.859643 |
| cg00362906 | 0.00363281 | 1720.60458 | 11.354413  | 260733.878 | cg17463145 | 0.00756144 | 23.9395729 | 2.32888426 | 246.084857 |
| cg19544662 | 0.00363286 | 7.03573047 | 1.889335   | 26.2004903 | cg13332774 | 0.00756204 | 140.738613 | 3.73193522 | 5307.52974 |
| cg01962969 | 0.00364948 | 493.298658 | 7.53939719 | 32276.2629 | cg14013195 | 0.00756967 | 9.39062357 | 1.81490013 | 48.5887954 |



|            |            |            |            |            |            |            |            |            |            |
|------------|------------|------------|------------|------------|------------|------------|------------|------------|------------|
| cg24241823 | 0.00364971 | 85.4970689 | 4.25955889 | 1716.08117 | cg01563704 | 0.00757013 | 6.09887716 | 1.61795238 | 22.9897388 |
| cg12889538 | 0.00365039 | 22.6119708 | 2.76171938 | 185.138732 | cg14808521 | 0.00757735 | 59701009.6 | 117.114625 | 3.0434E+13 |
| cg07706558 | 0.0036509  | 8.51380565 | 2.00900481 | 36.0799966 | cg23709674 | 0.00758982 | 16629174.8 | 83.1459439 | 3.3258E+12 |
| cg10984505 | 0.00365362 | 1628346.88 | 105.461734 | 2.5142E+10 | cg07217928 | 0.00759326 | 284.858006 | 4.49282044 | 18060.8338 |
| cg09871837 | 0.00366472 | 26.5407313 | 2.9069572  | 242.318814 | cg17861295 | 0.0075974  | 6.10894278 | 1.61769073 | 23.0694169 |
| cg03436149 | 0.0036649  | 1179847.64 | 94.659757  | 1.4706E+10 | cg08366813 | 0.00760048 | 8908.91691 | 11.2109841 | 7079556.98 |
| cg09802835 | 0.00367364 | 6.64335069 | 1.85146557 | 23.8373909 | cg03219968 | 0.00760399 | 8.14617158 | 1.74599042 | 38.0071451 |
| cg22991959 | 0.00367448 | 126.083593 | 4.82271599 | 3296.29042 | cg08729318 | 0.00760837 | 5.23682708 | 1.55245617 | 17.6651414 |
| cg22566736 | 0.00367833 | 143.060765 | 5.02311027 | 4074.44422 | cg09825979 | 0.00760921 | 15.5059356 | 2.07129417 | 116.079136 |
| cg00987461 | 0.00368109 | 5.86374191 | 1.7773286  | 19.3455893 | cg18108237 | 0.00761488 | 6.24E-09   | 5.89E-15   | 0.00662399 |
| cg10260334 | 0.00368655 | 0.0589049  | 0.00871061 | 0.39834045 | cg11334004 | 0.00762286 | 970.133076 | 6.20757093 | 151614.568 |
| cg08603911 | 0.00369921 | 15409.8818 | 22.9161853 | 10362303   | cg07116997 | 0.00762436 | 23.5861294 | 2.31407648 | 240.400654 |
| cg06466348 | 0.00371095 | 9.59558518 | 2.08322936 | 44.1983281 | cg04450855 | 0.0076278  | 67.947597  | 3.06395432 | 1506.83576 |
| cg17008160 | 0.00372031 | 13.9562173 | 2.35142265 | 82.8332588 | cg25756470 | 0.00764286 | 111.186643 | 3.48878944 | 3543.48401 |
| cg02770985 | 0.00372061 | 1191.34834 | 9.94862382 | 142664.039 | cg18953104 | 0.00764604 | 7.55478142 | 1.70961019 | 33.3846408 |
| cg22286382 | 0.00372273 | 8.92356357 | 2.03368213 | 39.1555718 | cg07023915 | 0.007653   | 5553717.98 | 61.3817649 | 5.0249E+11 |
| cg19843939 | 0.00373462 | 7.74789266 | 1.94167774 | 30.9164798 | cg26966013 | 0.00766058 | 402.709988 | 4.90189446 | 33084.2159 |
| cg21195414 | 0.00373545 | 595827.264 | 74.4004498 | 4771612668 | cg04220455 | 0.00766305 | 454.059296 | 5.05937894 | 40750.0301 |
| cg26099580 | 0.00374134 | 273441.3   | 57.7202498 | 1295388440 | cg08869573 | 0.00766315 | 6.98209446 | 1.67356741 | 29.129178  |
| cg07201835 | 0.00374402 | 0.08088755 | 0.01477438 | 0.44284731 | cg20495332 | 0.00766355 | 1809.39695 | 7.29760616 | 448628.94  |
| cg03997400 | 0.00375155 | 6399.44699 | 17.0718472 | 2398857.1  | cg26527984 | 0.00766673 | 42.5075961 | 2.70052503 | 669.09053  |
| cg06994747 | 0.00375495 | 33.7175234 | 3.1229053  | 364.042862 | cg23792245 | 0.00767032 | 261919224  | 169.806792 | 4.04E+14   |
| cg08700651 | 0.00376668 | 19.5168343 | 2.61459339 | 145.684916 | cg26912602 | 0.00767479 | 113.228875 | 3.49927602 | 3663.83731 |
| cg25913761 | 0.00376728 | 468.133874 | 7.30707498 | 29991.3885 | cg23375552 | 0.00767529 | 22.7738905 | 2.28823637 | 226.659315 |
| cg12891177 | 0.00376758 | 93.4940169 | 4.33957997 | 2014.28047 | cg22931309 | 0.00769001 | 23740.9129 | 14.3886557 | 39171897.5 |
| cg05892930 | 0.00376903 | 70.2989071 | 3.95677649 | 1248.98041 | cg08430407 | 0.00769946 | 69.3767547 | 3.06963266 | 1567.98374 |
| cg21701379 | 0.00377191 | 10.870013  | 2.16311844 | 54.6235385 | cg12648523 | 0.00769949 | 2978.68257 | 8.29925114 | 1069078.37 |
| cg14167139 | 0.00377513 | 510.719224 | 7.50864022 | 34737.8644 | cg05003322 | 0.00771523 | 12.686974  | 1.95740042 | 82.2311607 |
| cg20256260 | 0.00377655 | 17.0401395 | 2.50094348 | 116.102725 | cg03514404 | 0.00772044 | 4.36445043 | 1.47614606 | 12.9041618 |
| cg20567404 | 0.00377968 | 550522.682 | 71.696484  | 4227197850 | cg12110327 | 0.00772323 | 25.589747  | 2.35556736 | 277.994661 |

|            |            |            |            |            |            |            |            |            |            |
|------------|------------|------------|------------|------------|------------|------------|------------|------------|------------|
| cg16435858 | 0.00378273 | 2758.88382 | 12.9386526 | 588271.448 | cg16754467 | 0.00772483 | 6.66745966 | 1.6509121  | 26.9275501 |
| cg27438798 | 0.00378485 | 4.32906293 | 1.6055634  | 11.6724047 | cg00601350 | 0.00772539 | 9.80835853 | 1.8281574  | 52.6234213 |
| cg24908234 | 0.00378493 | 24532868.1 | 244.18359  | 2.4648E+12 | cg04282419 | 0.00772579 | 127.40668  | 3.5995934  | 4509.52657 |
| cg14777341 | 0.00378587 | 14.0679657 | 2.34955951 | 84.2318133 | cg05588972 | 0.00772625 | 390.095157 | 4.83780937 | 31455.1939 |
| cg01645998 | 0.00378616 | 7.88599002 | 1.94878367 | 31.9116172 | cg19975218 | 0.00772695 | 37.2609387 | 2.60105404 | 533.774974 |
| cg13768304 | 0.00379003 | 1381.6646  | 10.3369243 | 184677.474 | cg00752778 | 0.00772778 | 3610.17518 | 8.70799389 | 1496712.67 |
| cg18404009 | 0.00379191 | 3.2806E+10 | 2491.21194 | 4.3202E+17 | cg02811074 | 0.00772982 | 42.2857805 | 2.68911412 | 664.935422 |
| cg22804475 | 0.00379582 | 4.956E+16  | 245967.233 | 9.99E+27   | cg24577131 | 0.00773772 | 9.1029162  | 1.79186779 | 46.2439717 |
| cg16590005 | 0.00380445 | 8.60707227 | 2.00313372 | 36.9828994 | cg22351880 | 0.0077381  | 2.7052E+10 | 568.788994 | 1.2867E+18 |
| cg10534672 | 0.00380453 | 170.316527 | 5.24927812 | 5526.03972 | cg20303021 | 0.00774578 | 1.3415E+10 | 471.603496 | 3.8162E+17 |
| cg24395504 | 0.00380597 | 12.7625428 | 2.27452866 | 71.6115392 | cg04107003 | 0.00774819 | 60.5841718 | 2.95441623 | 1242.35774 |
| cg24987648 | 0.00380862 | 2164.77458 | 11.917448  | 393225.882 | cg02706018 | 0.00775433 | 25.455053  | 2.34944203 | 275.793025 |
| cg00058923 | 0.0038117  | 685.469272 | 8.22004021 | 57161.2926 | cg04844391 | 0.00775858 | 2.9475E+17 | 40650.1958 | 2.14E+30   |
| cg00551143 | 0.00381266 | 9.72841916 | 2.0831403  | 45.4324365 | cg05148093 | 0.00775941 | 4401.67929 | 9.14701208 | 2118154.03 |
| cg13565401 | 0.0038161  | 2.91E-05   | 2.46E-08   | 0.03445552 | cg25556905 | 0.00776839 | 4.37723773 | 1.47603242 | 12.9808871 |
| cg13643339 | 0.00381692 | 80803.5278 | 38.2486162 | 170704479  | cg19539667 | 0.0077789  | 8.71559175 | 1.76905331 | 42.9390902 |
| cg12506775 | 0.00382093 | 5.51490099 | 1.73413905 | 17.5384627 | cg24120357 | 0.00779862 | 25.0139176 | 2.33463765 | 268.005646 |
| cg21510789 | 0.00382491 | 7383060.39 | 163.646081 | 3.3309E+11 | cg06304787 | 0.00780072 | 11224938.2 | 71.867287  | 1.7532E+12 |
| cg23097623 | 0.00382501 | 306044.221 | 58.6511043 | 1596953138 | cg27265272 | 0.00780142 | 10433.0663 | 11.4324185 | 9521071.46 |
| cg05045781 | 0.00382891 | 12420.6523 | 20.8636827 | 7394313.13 | cg02862835 | 0.00780266 | 14640.3321 | 12.4974489 | 17150646.2 |
| cg07641943 | 0.00382923 | 4491012.67 | 139.239507 | 1.4485E+11 | cg19597031 | 0.00780445 | 65.2247809 | 3.00406894 | 1416.16991 |
| cg22555539 | 0.00383393 | 2610191.04 | 116.744274 | 5.8359E+10 | cg10355455 | 0.00780641 | 20143.9716 | 13.5869388 | 29865416.9 |
| cg26094150 | 0.00383431 | 100.869358 | 4.42108916 | 2301.38481 | cg06127885 | 0.0078144  | 41.6430652 | 2.66815399 | 649.941827 |
| cg23299109 | 0.00383827 | 15.4343611 | 2.41430467 | 98.6700255 | cg25996566 | 0.00781965 | 833620690  | 222.407661 | 3.1245E+15 |
| cg25087049 | 0.00384018 | 272.401622 | 6.0848561  | 12194.6423 | cg00463577 | 0.0078241  | 103.230626 | 3.38638003 | 3146.88904 |
| cg14684375 | 0.00384138 | 1.02E-05   | 4.24E-09   | 0.02472495 | cg01834022 | 0.00783033 | 5.774916   | 1.5858762  | 21.0291665 |
| cg13234997 | 0.00384298 | 513838720  | 638.003224 | 4.1384E+14 | cg26333513 | 0.00783486 | 44.2092556 | 2.70796976 | 721.743021 |
| cg20801007 | 0.00384406 | 3.90333826 | 1.55033595 | 9.82757934 | cg27221266 | 0.00784167 | 56481396.3 | 109.025456 | 2.9261E+13 |
| cg08462879 | 0.0038461  | 11.6995049 | 2.2073852  | 62.0093021 | cg01044129 | 0.0078432  | 34.310463  | 2.53248555 | 464.842879 |
| cg23084986 | 0.00384648 | 44.9842274 | 3.405355   | 594.234877 | cg18923472 | 0.0078511  | 0.06696952 | 0.00912497 | 0.49149923 |

|            |            |            |            |            |            |            |            |            |            |
|------------|------------|------------|------------|------------|------------|------------|------------|------------|------------|
| cg12111272 | 0.00384854 | 1509460.43 | 97.4713092 | 2.3376E+10 | cg13320002 | 0.00785293 | 41612.1817 | 16.3495889 | 105909309  |
| cg16124934 | 0.00385001 | 14.7778028 | 2.37929447 | 91.7849633 | cg02572755 | 0.00785607 | 7.4731E+12 | 2407.0945  | 2.32E+22   |
| cg06491405 | 0.00385326 | 11.6244202 | 2.20207405 | 61.3635797 | cg26404511 | 0.00785816 | 8.82871871 | 1.77188764 | 43.9905286 |
| cg15579745 | 0.00385546 | 972.580224 | 9.14904677 | 103389.164 | cg10336707 | 0.00786445 | 13.9064502 | 1.99606912 | 96.8850997 |
| cg10320160 | 0.00385978 | 0.07254966 | 0.01223971 | 0.43003089 | cg11517045 | 0.00787325 | 2798.08549 | 8.02944279 | 975071.694 |
| cg19664945 | 0.00386153 | 7.21521738 | 1.88818762 | 27.5710746 | cg25599242 | 0.00787875 | 32.1255994 | 2.48541837 | 415.243626 |
| cg10709343 | 0.00386324 | 1015.33375 | 9.26701568 | 111244.295 | cg26942275 | 0.00788143 | 17.5803082 | 2.12156713 | 145.678744 |
| cg11589885 | 0.0038667  | 0.01603426 | 0.00097106 | 0.26476091 | cg11845241 | 0.00789122 | 0.0667136  | 0.00905279 | 0.49163923 |
| cg09053081 | 0.00386798 | 5.29117665 | 1.70856809 | 16.3859728 | cg13873920 | 0.00789143 | 2.8289E+13 | 3370.51986 | 2.37E+23   |
| cg13181928 | 0.00386943 | 13.2089025 | 2.29268097 | 76.1009087 | cg26162295 | 0.00790328 | 33.6408455 | 2.51308565 | 450.325474 |
| cg01507044 | 0.0038707  | 264.762006 | 6.00975441 | 11664.1905 | cg06451479 | 0.00790793 | 65.9791588 | 2.99767613 | 1452.20805 |
| cg21229079 | 0.00387808 | 11.5109015 | 2.19258862 | 60.4312416 | cg02866325 | 0.00792026 | 484858.788 | 30.839975  | 7622835114 |
| cg10616306 | 0.00388005 | 2918451760 | 1099.01088 | 7.75E+15   | cg24461171 | 0.00792156 | 26.6771454 | 2.36318009 | 301.149325 |
| cg01381613 | 0.00388829 | 0.00397504 | 9.32E-05   | 0.16946635 | cg01349853 | 0.00792865 | 118.078866 | 3.48750396 | 3997.87895 |
| cg01040523 | 0.00389615 | 8.51286836 | 1.98853635 | 36.4433508 | cg04339790 | 0.00793208 | 24.4174666 | 2.30811342 | 258.311688 |
| cg14934978 | 0.00389931 | 11736.5559 | 20.2295855 | 6809172.87 | cg21611775 | 0.00794459 | 0.12585094 | 0.02724016 | 0.58143776 |
| cg07363112 | 0.00390069 | 13960.0536 | 21.3824967 | 9114141.31 | cg07371589 | 0.00794944 | 5.97451737 | 1.59607349 | 22.3641694 |
| cg14311481 | 0.00390095 | 31.5459334 | 3.02684734 | 328.773078 | cg27586487 | 0.00795375 | 8.50846239 | 1.75052474 | 41.3555607 |
| cg09026481 | 0.00390397 | 363324.117 | 60.8001173 | 2171121040 | cg18123399 | 0.00796219 | 28320438.9 | 88.7318934 | 9.039E+12  |
| cg25892296 | 0.00390473 | 11.5826    | 2.19424224 | 61.140297  | cg04507515 | 0.00796435 | 9.61021162 | 1.80665279 | 51.1200425 |
| cg07365623 | 0.00390785 | 1.81E-06   | 2.28E-10   | 0.01439288 | cg08579540 | 0.00796697 | 12.1730026 | 1.92165974 | 77.1114622 |
| cg25261228 | 0.00391713 | 42.8349306 | 3.33519633 | 550.14191  | cg10498682 | 0.00797157 | 0.00604844 | 0.00013898 | 0.26323103 |
| cg11491247 | 0.00392831 | 21.0158776 | 2.65278577 | 166.491812 | cg04751811 | 0.00797239 | 4.71325477 | 1.49945763 | 14.8152039 |
| cg06025835 | 0.00393812 | 38.7124421 | 3.2240576  | 464.834492 | cg11008243 | 0.0079725  | 17.8541431 | 2.12358313 | 150.109699 |
| cg00973823 | 0.0039383  | 25.8653864 | 2.83350543 | 236.109734 | cg01918706 | 0.00797523 | 3274.30555 | 8.28627478 | 1293835.54 |
| cg12265829 | 0.00393998 | 5.7384073  | 1.74954704 | 18.821625  | cg16370061 | 0.00797739 | 6617896.8  | 60.5070719 | 7.2383E+11 |
| cg18570262 | 0.00394199 | 0.00014537 | 3.58E-07   | 0.05909812 | cg00072369 | 0.00798272 | 1.0399E+14 | 4579.7388  | 2.36E+24   |
| cg16399136 | 0.00394249 | 4.7970149  | 1.65188306 | 13.9303759 | cg23930313 | 0.00798495 | 7.77711433 | 1.70857104 | 35.4000541 |
| cg10500147 | 0.00394414 | 6.73104228 | 1.84095869 | 24.6105089 | cg01085803 | 0.00798648 | 19.2465942 | 2.16461089 | 171.130705 |
| cg00740389 | 0.00394511 | 8.10877368 | 1.95394473 | 33.6510085 | cg02417033 | 0.00798865 | 14.9436584 | 2.02606206 | 110.22018  |

|            |            |            |            |            |            |            |            |            |            |
|------------|------------|------------|------------|------------|------------|------------|------------|------------|------------|
| cg23761196 | 0.00394703 | 276522.779 | 55.1361818 | 1386836100 | cg17147466 | 0.00800304 | 194.757531 | 3.95733823 | 9584.85068 |
| cg22122291 | 0.00394741 | 852936589  | 721.048287 | 1.0089E+15 | cg15028904 | 0.00800654 | 150.964923 | 3.7021135  | 6156.05326 |
| cg10804090 | 0.00395769 | 9.4453E+12 | 14114.4935 | 6.32E+21   | cg19488206 | 0.00800797 | 90.3157521 | 3.23749182 | 2519.52299 |
| cg14315558 | 0.00395841 | 3.88023464 | 1.54282784 | 9.75884701 | cg26173173 | 0.0080099  | 8742573.34 | 64.6753559 | 1.1818E+12 |
| cg10723075 | 0.00396401 | 318388295  | 522.830755 | 1.9389E+14 | cg04772328 | 0.00801001 | 16.1499981 | 2.06610525 | 126.238698 |
| cg05022341 | 0.00396522 | 46106.7854 | 30.9656571 | 68651398.3 | cg16909733 | 0.00801004 | 11.4769249 | 1.88997297 | 69.6940155 |
| cg20701689 | 0.0039655  | 7.59774181 | 1.9121702  | 30.1885683 | cg26069745 | 0.00801493 | 23.7384713 | 2.28406269 | 246.716092 |
| cg05598363 | 0.00396939 | 78.2700785 | 4.028873   | 1520.5754  | cg05401965 | 0.00801769 | 9.82473823 | 1.81450391 | 53.1966235 |
| cg07297068 | 0.00397033 | 0.0794019  | 0.01416612 | 0.44505209 | cg15439862 | 0.00802119 | 16.4080091 | 2.0739024  | 129.814577 |
| cg27262412 | 0.00397226 | 7.77409414 | 1.9257472  | 31.3834234 | cg13951491 | 0.00803461 | 13.7583242 | 1.9800061  | 95.6014659 |
| cg26266703 | 0.00397252 | 3913.172   | 14.0586373 | 1089217.6  | cg01040499 | 0.00803656 | 93.6240476 | 3.263044   | 2686.28382 |
| cg15215033 | 0.00398109 | 70.7590769 | 3.89740341 | 1284.66223 | cg23536255 | 0.00803815 | 259.384945 | 4.25482115 | 15812.7797 |
| cg02882448 | 0.00398583 | 37.133403  | 3.17106766 | 434.834501 | cg21197375 | 0.00804117 | 1266036.6  | 38.8681889 | 4.1238E+10 |
| cg15042692 | 0.00398668 | 398423959  | 556.983697 | 2.85E+14   | cg07064364 | 0.00804872 | 138.554763 | 3.61135532 | 5315.84975 |
| cg09584855 | 0.0039907  | 203.13286  | 5.45298136 | 7567.04562 | cg10282807 | 0.00805    | 9.55982428 | 1.80007597 | 50.7702129 |
| cg04923496 | 0.00399289 | 6.7385E+12 | 12425.1011 | 3.65E+21   | cg25851671 | 0.00805872 | 159.600804 | 3.7445898  | 6802.45846 |
| cg03368099 | 0.00399382 | 13.1135292 | 2.27356026 | 75.6367231 | cg06416883 | 0.00805955 | 9551.63399 | 10.861579  | 8399673.01 |
| cg24315815 | 0.00400165 | 11.2604925 | 2.16490036 | 58.5702207 | cg09089053 | 0.00806364 | 133.489525 | 3.57344665 | 4986.62916 |
| cg14884929 | 0.0040018  | 8.72970173 | 1.99603492 | 38.1795386 | cg04796763 | 0.00806863 | 4.78811857 | 1.50298239 | 15.2537245 |
| cg07725729 | 0.00400467 | 122.151307 | 4.63004689 | 3222.63297 | cg06917617 | 0.00807041 | 7.26361249 | 1.67502917 | 31.4979986 |
| cg18023065 | 0.00400525 | 0.15619224 | 0.04410427 | 0.55314414 | cg00530805 | 0.0080736  | 12.3103909 | 1.92125602 | 78.8784637 |
| cg15846316 | 0.00400932 | 7.86387729 | 1.93006753 | 32.040623  | cg16400756 | 0.00809363 | 0.12734382 | 0.02770423 | 0.58534185 |
| cg21193251 | 0.00400985 | 2.6042E+12 | 9090.70831 | 7.46E+20   | cg07548313 | 0.0080957  | 0.15551818 | 0.03922614 | 0.61657623 |
| cg08775774 | 0.00401027 | 305.539272 | 6.19892009 | 15059.7597 | cg05899618 | 0.00809978 | 9.799087   | 1.80929482 | 53.0715642 |
| cg22233523 | 0.00401104 | 82299.7359 | 36.9071016 | 183521496  | cg23864823 | 0.00809989 | 580873438  | 189.186812 | 1.7835E+15 |
| cg06813515 | 0.00401152 | 39.8607082 | 3.23791796 | 490.709179 | cg23345004 | 0.00810006 | 12.4887765 | 1.92695483 | 80.9409413 |
| cg25258291 | 0.00401431 | 49598521.9 | 283.774562 | 8.6689E+12 | cg01147995 | 0.00810122 | 2865588.72 | 47.5851483 | 1.7257E+11 |
| cg23599104 | 0.00401843 | 5.90240188 | 1.76080224 | 19.7854972 | cg00515408 | 0.00810412 | 93.3549417 | 3.24893256 | 2682.46416 |
| cg16300030 | 0.00401875 | 57.9334623 | 3.64584228 | 920.579057 | cg26964592 | 0.00810465 | 0.02250347 | 0.00135672 | 0.37325807 |
| cg15118279 | 0.00402376 | 8881.7556  | 18.1097423 | 4355974.89 | cg16327839 | 0.00810799 | 0.11063183 | 0.02168043 | 0.56453672 |

|            |            |            |            |            |
|------------|------------|------------|------------|------------|
| cg06085985 | 0.0040238  | 5.44351777 | 1.71567832 | 17.2712363 |
| cg01871408 | 0.00402709 | 0.07352681 | 0.01241506 | 0.43545434 |
| cg05779272 | 0.0040287  | 90.0359463 | 4.19235583 | 1933.63158 |
| cg02889982 | 0.00402985 | 2014.09741 | 11.2782042 | 359683.891 |
| cg05240614 | 0.00403794 | 1036582132 | 740.998989 | 1.4501E+15 |
| cg08849717 | 0.00403948 | 1984540.73 | 101.034629 | 3.8981E+10 |
| cg02987906 | 0.00404345 | 0.08552719 | 0.01599663 | 0.45727771 |
| cg21748136 | 0.00404394 | 13.7478951 | 2.30246515 | 82.0879388 |
| cg00868652 | 0.00404543 | 13.7868734 | 2.30437381 | 82.4856957 |
| cg16593646 | 0.00405009 | 11710.3203 | 19.6869132 | 6965622.32 |
| cg13425174 | 0.00406205 | 72.3092477 | 3.89926971 | 1340.92476 |
| cg15794034 | 0.00406318 | 17.5389061 | 2.48545494 | 123.765361 |
| cg02132284 | 0.00406421 | 9.19870194 | 2.02442618 | 41.7975812 |
| cg04552500 | 0.0040643  | 244065.446 | 51.5591846 | 1155331339 |
| cg02891574 | 0.00406627 | 1096019.56 | 83.0635182 | 1.4462E+10 |
| cg26416971 | 0.00406743 | 8.40327721 | 1.96681409 | 35.9032753 |
| cg21103829 | 0.00406765 | 652181.993 | 70.407151  | 6041166937 |
| cg02774070 | 0.00407016 | 1.8262E+14 | 33977.7219 | 9.82E+23   |
| cg09893504 | 0.00407239 | 16.8430978 | 2.45250358 | 115.673611 |
| cg16933440 | 0.00407519 | 339.276439 | 6.36466693 | 18085.55   |
| cg16493531 | 0.00407713 | 927529.342 | 78.5559644 | 1.0952E+10 |
| cg17278655 | 0.00408017 | 8.1053E+10 | 2910.26665 | 2.2574E+18 |
| cg08983217 | 0.00408785 | 12.0780983 | 2.20506412 | 66.1570145 |
| cg11139684 | 0.00408844 | 6481763.01 | 145.186479 | 2.8937E+11 |
| cg24405664 | 0.0040893  | 16976441.5 | 197.027712 | 1.4627E+12 |
| cg16925659 | 0.00409033 | 31620750.3 | 239.946663 | 4.1671E+12 |
| cg00169633 | 0.00409395 | 5705626631 | 1245.98327 | 2.6127E+16 |
| cg09234474 | 0.00409475 | 63586.9365 | 33.4162629 | 120997926  |
| cg04573510 | 0.00409656 | 996178805  | 715.469431 | 1.387E+15  |
| cg09175928 | 0.00410714 | 2.3024E+15 | 74206.8219 | 7.14E+25   |

|            |            |            |            |            |
|------------|------------|------------|------------|------------|
| cg15173196 | 0.00812058 | 571.843242 | 5.19601051 | 62933.8015 |
| cg22956431 | 0.0081249  | 72.5352054 | 3.03965678 | 1730.90464 |
| cg17283453 | 0.00812727 | 13.1505283 | 1.95138158 | 88.622541  |
| cg09560599 | 0.0081326  | 19159.6471 | 12.9099238 | 28434875.5 |
| cg25852200 | 0.00813294 | 28402.9871 | 14.2975004 | 56424525.6 |
| cg00403955 | 0.00813517 | 788.430954 | 5.64134498 | 110190.632 |
| cg10635330 | 0.00813896 | 145.468001 | 3.63829865 | 5816.16335 |
| cg12691382 | 0.00815182 | 27.0002884 | 2.3496395  | 310.26699  |
| cg08513472 | 0.00815635 | 6.4718421  | 1.62244654 | 25.8157905 |
| cg23747525 | 0.00815716 | 242.430037 | 4.14878638 | 14166.1483 |
| cg26575389 | 0.0081756  | 14.7573567 | 2.00759681 | 108.477745 |
| cg01516119 | 0.0081863  | 17629.4671 | 12.557351  | 24750292.5 |
| cg26435178 | 0.00819118 | 11.0157047 | 1.86040224 | 65.2255445 |
| cg02282382 | 0.00820492 | 1835.76622 | 6.98152088 | 482708.235 |
| cg20743280 | 0.00821564 | 11.3298965 | 1.87270121 | 68.5462017 |
| cg27612744 | 0.00822071 | 5269.54343 | 9.15561819 | 3032901.48 |
| cg17195127 | 0.00822774 | 556.100288 | 5.11812473 | 60422.0386 |
| cg11785652 | 0.00823037 | 4.91650129 | 1.50884051 | 16.0202386 |
| cg10715905 | 0.00824639 | 37.6667088 | 2.55124642 | 556.112863 |
| cg00994629 | 0.00826931 | 8.03567535 | 1.71137789 | 37.7310463 |
| cg09026481 | 0.0082772  | 673455.218 | 31.7840508 | 1.4269E+10 |
| cg06848185 | 0.00828326 | 6.96274681 | 1.64877937 | 29.4034751 |
| cg08336736 | 0.00828799 | 69052551.5 | 104.59838  | 4.5586E+13 |
| cg15007132 | 0.00829605 | 1453541.71 | 38.6357945 | 5.4685E+10 |
| cg05670898 | 0.00829702 | 33.4733301 | 2.46964148 | 453.694934 |
| cg06240854 | 0.00830269 | 35.0180759 | 2.49792201 | 490.914302 |
| cg08024097 | 0.00830472 | 14381770.7 | 69.601034  | 2.9717E+12 |
| cg24079361 | 0.00830925 | 6.9006112  | 1.64402656 | 28.9645168 |
| cg05434115 | 0.0083133  | 51.8358762 | 2.76200014 | 972.830531 |
| cg25823214 | 0.00831605 | 5.5586E+11 | 1051.83166 | 2.94E+20   |

|            |            |            |            |            |            |            |            |            |            |
|------------|------------|------------|------------|------------|------------|------------|------------|------------|------------|
| cg00338116 | 0.00410744 | 14.0944586 | 2.31360688 | 85.8632319 | cg07647796 | 0.00832257 | 918492.129 | 34.1850825 | 2.4678E+10 |
| cg07217928 | 0.00410934 | 221.865419 | 5.54259169 | 8881.09157 | cg16047144 | 0.00832499 | 6.4854647  | 1.61743528 | 26.004906  |
| cg23600701 | 0.00411332 | 29.0927681 | 2.91014568 | 290.84082  | cg16990120 | 0.00832751 | 74.4358537 | 3.02941186 | 1828.96766 |
| cg04395689 | 0.00411788 | 7.12170318 | 1.86267364 | 27.2289548 | cg03781098 | 0.00833487 | 12.6829022 | 1.92139619 | 83.7182931 |
| cg23764900 | 0.00411804 | 34.8302927 | 3.08004032 | 393.874484 | cg04776910 | 0.00833529 | 34762599.2 | 86.8247892 | 1.3918E+13 |
| cg16594066 | 0.00412043 | 48879.1795 | 30.584783  | 78116434.2 | cg11166999 | 0.00833975 | 0.01601027 | 0.00074184 | 0.34552914 |
| cg02225096 | 0.00412236 | 18169.9458 | 22.3462648 | 14774143.8 | cg03847535 | 0.00834022 | 36.2379553 | 2.51614959 | 521.904345 |
| cg11406274 | 0.00412505 | 25.6371223 | 2.79388316 | 235.250367 | cg03905819 | 0.00834281 | 11.9546695 | 1.89198159 | 75.5367401 |
| cg20415170 | 0.00412771 | 229.43036  | 5.59159335 | 9413.82656 | cg16585234 | 0.00834477 | 16.2007188 | 2.04555683 | 128.30897  |
| cg23020159 | 0.00412953 | 87128187.2 | 326.668918 | 2.3239E+13 | cg20925462 | 0.00834508 | 14.3318894 | 1.98211534 | 103.628205 |
| cg15586945 | 0.00413034 | 1445886342 | 794.793193 | 2.6304E+15 | cg22125112 | 0.00834703 | 11.2275084 | 1.86149602 | 67.7180851 |
| cg07824564 | 0.00413458 | 124090368  | 364.745151 | 4.2217E+13 | cg19224164 | 0.00835391 | 10.9920772 | 1.85103784 | 65.2746033 |
| cg09200186 | 0.00413677 | 3490.39984 | 13.2226703 | 921363.895 | cg13319446 | 0.00835704 | 9.5756516  | 1.78645082 | 51.3269676 |
| cg00465883 | 0.00413838 | 0.06374215 | 0.00970995 | 0.41844313 | cg04670377 | 0.00836407 | 720215.964 | 31.9071208 | 1.6257E+10 |
| cg15106368 | 0.00414077 | 94.738134  | 4.22110015 | 2126.29734 | cg26507725 | 0.00837096 | 8.53176128 | 1.73367734 | 41.9864462 |
| cg02583525 | 0.00414241 | 13.5970797 | 2.28359365 | 80.9603649 | cg25220065 | 0.00837364 | 3.175E+10  | 495.616274 | 2.034E+18  |
| cg00836482 | 0.00414478 | 4.90997415 | 1.65434321 | 14.5724576 | cg27111250 | 0.0083779  | 17.647474  | 2.08874421 | 149.100755 |
| cg18334142 | 0.00414883 | 1282068.73 | 85.4695424 | 1.9231E+10 | cg10087374 | 0.00838395 | 55812.0776 | 16.5056015 | 188723083  |
| cg18556179 | 0.00415286 | 50.0820584 | 3.44707734 | 727.634551 | cg26680675 | 0.00838657 | 19.9674368 | 2.1553608  | 184.97995  |
| cg15569340 | 0.00415936 | 78.9901973 | 3.97925186 | 1567.99607 | cg10417218 | 0.00838749 | 83.2284229 | 3.10821343 | 2228.60191 |
| cg14593867 | 0.00415978 | 3629185.71 | 118.42157  | 1.1122E+11 | cg04385193 | 0.00838957 | 438207627  | 164.517105 | 1.1672E+15 |
| cg19477674 | 0.00416002 | 72.0793766 | 3.86554365 | 1344.03773 | cg10134882 | 0.00839069 | 538.754268 | 5.01703146 | 57854.1641 |
| cg08104023 | 0.00416175 | 0.09148097 | 0.01782084 | 0.46960575 | cg21100807 | 0.00839464 | 11180917   | 64.1530122 | 1.9487E+12 |
| cg07833852 | 0.00417019 | 0.08500914 | 0.01574362 | 0.45901474 | cg24548564 | 0.00839915 | 124.287118 | 3.44270145 | 4486.967   |
| cg12832498 | 0.00417328 | 4209900.36 | 123.64727  | 1.4334E+11 | cg00027499 | 0.00840161 | 48468.2079 | 15.8843737 | 147891710  |
| cg10418263 | 0.00417605 | 18.4537144 | 2.51079672 | 135.630086 | cg00500989 | 0.00840989 | 644556.381 | 30.7945794 | 1.3491E+10 |
| cg26835312 | 0.00418044 | 20.5185758 | 2.5956924  | 162.196396 | cg11819639 | 0.00841472 | 2300.44975 | 7.26429383 | 728504.268 |
| cg15348799 | 0.00418145 | 17609.4802 | 21.8943268 | 14163202.8 | cg15794034 | 0.00842244 | 29.786353  | 2.38489091 | 372.019877 |
| cg18346784 | 0.00419169 | 2529847.18 | 104.760077 | 6.1093E+10 | cg03822267 | 0.00842937 | 57.6898393 | 2.82387863 | 1178.56253 |
| cg11469308 | 0.00419373 | 9.00915681 | 2.00064723 | 40.5693243 | cg27323009 | 0.00843003 | 31.8831622 | 2.42607606 | 419.004188 |

|            |            |            |            |            |            |            |            |            |            |
|------------|------------|------------|------------|------------|------------|------------|------------|------------|------------|
| cg20730198 | 0.00419723 | 29.4770258 | 2.90723106 | 298.87375  | cg00705992 | 0.00843175 | 32.6712642 | 2.4411219  | 437.262682 |
| cg00357958 | 0.00419998 | 9.80577379 | 2.05431513 | 46.8054769 | cg26399396 | 0.0084346  | 1271.59529 | 6.23070091 | 259514.073 |
| cg24693447 | 0.00420273 | 5878649821 | 1203.06612 | 2.8725E+16 | cg25619837 | 0.00843969 | 78642.7453 | 17.8948087 | 345613160  |
| cg06425443 | 0.00420395 | 11588.0887 | 19.1121108 | 7026110.42 | cg19283196 | 0.00844114 | 30.8089662 | 2.40384242 | 394.864652 |
| cg14806045 | 0.00420803 | 3932869.98 | 119.868642 | 1.2904E+11 | cg24880056 | 0.00844491 | 9.33504921 | 1.77084679 | 49.209872  |
| cg15945016 | 0.00421081 | 46.162399  | 3.34590625 | 636.887863 | cg02710004 | 0.00844714 | 0.09370294 | 0.01608914 | 0.54572492 |
| cg26699183 | 0.00421151 | 5.6327E+14 | 44526.8671 | 7.13E+24   | cg00761126 | 0.00845369 | 112.441108 | 3.34561141 | 3778.98124 |
| cg23591302 | 0.00421682 | 4.74708563 | 1.6334592  | 13.7957667 | cg26053876 | 0.00845582 | 23.2952304 | 2.23672695 | 242.616902 |
| cg09930748 | 0.00421879 | 79229.587  | 34.9317196 | 179702790  | cg13570585 | 0.00845791 | 8.88367896 | 1.74797277 | 45.1493027 |
| cg11363229 | 0.00422233 | 0.06446195 | 0.00985412 | 0.42168611 | cg10300057 | 0.00846741 | 2.1564E+13 | 2556.86683 | 1.82E+23   |
| cg09261514 | 0.00422514 | 48844064.7 | 263.760159 | 9.0451E+12 | cg20691205 | 0.00847188 | 53.9470308 | 2.77046103 | 1050.46853 |
| cg17404605 | 0.00422942 | 8289.52856 | 17.1255591 | 4012498.7  | cg21329975 | 0.00847483 | 26.6539633 | 2.31346419 | 307.086559 |
| cg09700470 | 0.00423241 | 16.3097738 | 2.40791936 | 110.472438 | cg26534477 | 0.00848104 | 0.05585942 | 0.00651935 | 0.47861725 |
| cg02884024 | 0.00423423 | 92104.6862 | 36.5126531 | 232337902  | cg21153026 | 0.00848404 | 3324950078 | 270.20483  | 4.0914E+16 |
| cg02994288 | 0.00423512 | 1626982.56 | 90.1266479 | 2.9371E+10 | cg23575732 | 0.00848905 | 42.4004393 | 2.60320754 | 690.608499 |
| cg06240854 | 0.00423824 | 29.1023296 | 2.88833044 | 293.230156 | cg16335926 | 0.00848914 | 7241292.01 | 56.4258165 | 9.293E+11  |
| cg20272205 | 0.00423911 | 22.4920022 | 2.66326923 | 189.950817 | cg23979631 | 0.00848915 | 8.9247027  | 1.74867707 | 45.5489009 |
| cg01558040 | 0.00424198 | 9.05E-05   | 1.53E-07   | 0.05345202 | cg22971415 | 0.00850259 | 93317.308  | 18.5436747 | 469600557  |
| cg09432234 | 0.00424408 | 1295.75303 | 9.5296299  | 176184.797 | cg08160980 | 0.00850983 | 5.69320093 | 1.55841826 | 20.7983554 |
| cg13314965 | 0.00424478 | 0.09285506 | 0.01820899 | 0.47350586 | cg18357526 | 0.00851426 | 4393.01777 | 8.49279814 | 2272349.44 |
| cg23067317 | 0.00424811 | 9.94361765 | 2.05928291 | 48.0145449 | cg16570157 | 0.00851955 | 4.61750198 | 1.47710282 | 14.4345567 |
| cg20579480 | 0.00425025 | 13.5013284 | 2.26697501 | 80.409298  | cg02528979 | 0.00852454 | 1350950.84 | 36.5465802 | 4.9938E+10 |
| cg09718046 | 0.00425084 | 33479.4988 | 26.4709097 | 42343721.8 | cg18706879 | 0.00852593 | 6116830.14 | 53.6959449 | 6.9681E+11 |
| cg24323726 | 0.00425085 | 41.1264057 | 3.21767907 | 525.652562 | cg16364495 | 0.00853094 | 11.5077499 | 1.86378269 | 71.0535124 |
| cg17930034 | 0.00425094 | 10.7737102 | 2.11161397 | 54.9687745 | cg09161136 | 0.0085321  | 149635485  | 121.147485 | 1.8482E+14 |
| cg13254588 | 0.00425114 | 18873679.4 | 193.988868 | 1.8363E+12 | cg05095290 | 0.00853412 | 345.756901 | 4.43525893 | 26953.9697 |
| cg07046854 | 0.00425424 | 1174489.75 | 80.9526113 | 1.704E+10  | cg15345154 | 0.00853763 | 12.5304612 | 1.90430252 | 82.4514255 |
| cg07336964 | 0.00426246 | 0.05679255 | 0.00794372 | 0.40603076 | cg07488684 | 0.00854538 | 73.9420558 | 2.99216602 | 1827.24741 |
| cg21367811 | 0.0042682  | 7.91576435 | 1.91532621 | 32.7147016 | cg11923320 | 0.00854618 | 17.7258365 | 2.07967229 | 151.084035 |
| cg15834388 | 0.00427158 | 29.2704577 | 2.88775106 | 296.687519 | cg24533564 | 0.00854635 | 26.7039297 | 2.3084325  | 308.910857 |

|            |            |            |            |            |            |            |            |            |            |
|------------|------------|------------|------------|------------|------------|------------|------------|------------|------------|
| cg11896633 | 0.00427184 | 1485385152 | 759.531452 | 2.9049E+15 | cg03697629 | 0.00855014 | 686733.081 | 30.6373402 | 1.5393E+10 |
| cg01657408 | 0.00427623 | 74339.1703 | 33.844967  | 163283133  | cg27576259 | 0.00855394 | 38.2653725 | 2.52912454 | 578.950823 |
| cg06734406 | 0.00427689 | 5.26882326 | 1.68499809 | 16.475092  | cg02441296 | 0.00855452 | 119778.186 | 19.6283075 | 730924650  |
| cg15706223 | 0.00427783 | 1599.21067 | 10.1365478 | 252302.344 | cg12165563 | 0.00855482 | 828.261166 | 5.53240634 | 123999.67  |
| cg03394309 | 0.00427821 | 21.9661782 | 2.63781781 | 182.921271 | cg05487507 | 0.00856094 | 36.7423805 | 2.50239685 | 539.483786 |
| cg11565355 | 0.00427831 | 695.927969 | 7.80584159 | 62045.2942 | cg00739123 | 0.00857118 | 6714448.2  | 54.5480448 | 8.265E+11  |
| cg16449219 | 0.00427894 | 18.9804871 | 2.51946747 | 142.990094 | cg07706558 | 0.00857256 | 11.2884501 | 1.8525583  | 68.7854772 |
| cg17031543 | 0.00428301 | 12.2119604 | 2.19333023 | 67.9933984 | cg21368609 | 0.0085808  | 24.8978006 | 2.26479861 | 273.711081 |
| cg08389277 | 0.00428737 | 19.2302042 | 2.52870509 | 146.241155 | cg23797439 | 0.0085817  | 23.5436951 | 2.23274922 | 248.261459 |
| cg14122599 | 0.00428794 | 33.5730206 | 3.01176777 | 374.247883 | cg16257101 | 0.00858238 | 41485.6863 | 14.9349148 | 115237495  |
| cg17349406 | 0.00429048 | 26.1649735 | 2.78474005 | 245.84192  | cg01027365 | 0.0085884  | 580.652015 | 5.04196581 | 66870.1009 |
| cg15173196 | 0.0042916  | 208.753597 | 5.34192336 | 8157.74795 | cg20041105 | 0.0086048  | 28.5402952 | 2.3426963  | 347.69699  |
| cg00993830 | 0.00429175 | 9.91056361 | 2.05345708 | 47.8311781 | cg00054301 | 0.00861623 | 5684.65361 | 8.9802689  | 3598476.5  |
| cg07238832 | 0.00429511 | 70.7671745 | 3.8036414  | 1316.63121 | cg25044834 | 0.00861831 | 34015042.7 | 81.6685709 | 1.4167E+13 |
| cg27298072 | 0.00429545 | 0.10158219 | 0.02114174 | 0.48808374 | cg07571451 | 0.00862542 | 0.00262676 | 3.12E-05   | 0.22134894 |
| cg17512993 | 0.00430727 | 393164.661 | 56.6931109 | 2726582615 | cg18133072 | 0.00862759 | 113.527907 | 3.32286121 | 3878.76134 |
| cg22251932 | 0.00431363 | 7278.69837 | 16.220488  | 3266205.67 | cg18188377 | 0.00862894 | 160062.759 | 20.9211603 | 1224601625 |
| cg11304315 | 0.00431621 | 7685.38218 | 16.4924249 | 3581347.18 | cg27106909 | 0.00863053 | 16.5965337 | 2.03965639 | 135.044772 |
| cg07689503 | 0.0043166  | 214.978494 | 5.37856523 | 8592.58016 | cg00293996 | 0.00863434 | 71.6683939 | 2.9558073  | 1737.7177  |
| cg23269029 | 0.00431874 | 20.8968219 | 2.59113341 | 168.527473 | cg22467567 | 0.0086431  | 14.9168537 | 1.98442124 | 112.129682 |
| cg17469276 | 0.00431943 | 18.8342    | 2.50805643 | 141.435051 | cg05006903 | 0.00864845 | 5436.60875 | 8.85159173 | 3339141.2  |
| cg11268628 | 0.00431966 | 134.763593 | 4.64529538 | 3909.59553 | cg20600850 | 0.00865218 | 17.4041868 | 2.06296766 | 146.830086 |
| cg14860524 | 0.00432171 | 37.0942018 | 3.1007927  | 443.750981 | cg01850783 | 0.00865811 | 10.0697868 | 1.79551221 | 56.4744737 |
| cg01911068 | 0.00432646 | 48947.2212 | 29.398626  | 81494640.8 | cg11197945 | 0.00866289 | 21.4437245 | 2.17425717 | 211.489849 |
| cg07557790 | 0.00432957 | 48.3148088 | 3.3665364  | 693.389428 | cg03442712 | 0.00867339 | 44.3627026 | 2.61282804 | 753.225757 |
| cg04159381 | 0.00433195 | 2166.80214 | 11.0688389 | 424166.578 | cg26580856 | 0.00867421 | 98930.3537 | 18.4090804 | 531651483  |
| cg06835221 | 0.0043343  | 1375977.16 | 83.3898877 | 2.2704E+10 | cg15821939 | 0.00867512 | 36.4857197 | 2.48645619 | 535.383551 |
| cg06872500 | 0.00434081 | 384.608482 | 6.43723431 | 22979.3848 | cg20511194 | 0.0086809  | 100167.364 | 18.4512187 | 543785267  |
| cg16016641 | 0.00434269 | 152.068583 | 4.81458281 | 4803.08569 | cg08542090 | 0.0086849  | 29.8154264 | 2.36165188 | 376.414349 |
| cg23042086 | 0.00434654 | 111.851141 | 4.37211353 | 2861.47138 | cg21097354 | 0.00869008 | 46.6979408 | 2.64510109 | 824.42886  |



|            |            |            |            |            |            |            |            |            |            |
|------------|------------|------------|------------|------------|------------|------------|------------|------------|------------|
| cg15945129 | 0.00434879 | 6.59370236 | 1.80360688 | 24.1055362 | cg00264591 | 0.00869191 | 9.4936391  | 1.76740016 | 50.9953463 |
| cg01327552 | 0.00434979 | 11.0972392 | 2.1223673  | 58.024225  | cg05734154 | 0.00869516 | 23786.2769 | 12.8011951 | 44197980   |
| cg01323964 | 0.00435171 | 0.01461473 | 0.00080049 | 0.26682345 | cg25163611 | 0.00870135 | 22.6425871 | 2.20148242 | 232.882509 |
| cg06900571 | 0.00435221 | 0.18455118 | 0.05776633 | 0.58960189 | cg03553689 | 0.0087025  | 1.4057E+11 | 660.101217 | 2.9937E+19 |
| cg21951729 | 0.00435727 | 22.3446983 | 2.64049671 | 189.087734 | cg09370702 | 0.00870307 | 11127253.5 | 60.5591063 | 2.0445E+12 |
| cg05842457 | 0.0043589  | 3126643.04 | 107.116326 | 9.1264E+10 | cg20547295 | 0.00870612 | 2716.57197 | 7.3861673  | 999132.968 |
| cg19840532 | 0.00436004 | 147342.113 | 41.2204977 | 526672394  | cg16408081 | 0.00871043 | 82.6309074 | 3.05301096 | 2236.43706 |
| cg15701440 | 0.00436232 | 200860.408 | 45.3892919 | 888863906  | cg04918504 | 0.00871463 | 11.2864401 | 1.84534782 | 69.0296586 |
| cg18894815 | 0.00436265 | 7.03085452 | 1.8393018  | 26.8759131 | cg09584855 | 0.00872144 | 246.003263 | 4.02003449 | 15054.0015 |
| cg10437377 | 0.00436339 | 50323.5812 | 29.4466898 | 86001612.9 | cg10005098 | 0.00873183 | 1913218030 | 221.095847 | 1.6556E+16 |
| cg06364315 | 0.00436474 | 423.517962 | 6.61738048 | 27105.5087 | cg22581219 | 0.00874128 | 104.788882 | 3.23683767 | 3392.41905 |
| cg22308501 | 0.00436666 | 438.133582 | 6.68652019 | 28708.6602 | cg27648858 | 0.00874314 | 8.65255691 | 1.72427132 | 43.4193507 |
| cg27313566 | 0.00436773 | 0.1296476  | 0.03181794 | 0.52827118 | cg04071446 | 0.00874505 | 9674.39214 | 10.1434504 | 9227024.34 |
| cg07214715 | 0.00437553 | 976.088619 | 8.57844361 | 111063.153 | cg19483962 | 0.00874568 | 51628398.3 | 88.5307379 | 3.0108E+13 |
| cg04716996 | 0.00437728 | 26.6416098 | 2.7864993  | 254.71938  | cg10637512 | 0.00874759 | 14.8878725 | 1.97721038 | 112.101753 |
| cg09825979 | 0.0043778  | 10.3801083 | 2.07610026 | 51.8985761 | cg25361850 | 0.00874824 | 61.6362089 | 2.83000621 | 1342.40774 |
| cg00079898 | 0.00437993 | 0.09171235 | 0.01773115 | 0.47437178 | cg27308245 | 0.00875057 | 25.4900292 | 2.26442161 | 286.9349   |
| cg00069002 | 0.00438106 | 62.406292  | 3.63370973 | 1071.78216 | cg19789653 | 0.00876113 | 20.3525218 | 2.13861185 | 193.688791 |
| cg26843430 | 0.00438108 | 644.631759 | 7.53143946 | 55175.3894 | cg01086810 | 0.00877293 | 459781155  | 152.831579 | 1.3832E+15 |
| cg02716556 | 0.00439338 | 385748.932 | 55.2669337 | 2692427974 | cg24389730 | 0.00878445 | 7.16890167 | 1.64281358 | 31.2836171 |
| cg16522557 | 0.00439615 | 7.74210072 | 1.89324768 | 31.6599481 | cg02898915 | 0.00878447 | 86.5380421 | 3.07756896 | 2433.35984 |
| cg19904411 | 0.00439718 | 1547.96857 | 9.87938393 | 242546.165 | cg11705208 | 0.00878986 | 49.1774291 | 2.66840497 | 906.316528 |
| cg19264533 | 0.00439922 | 3911.39171 | 13.1869263 | 1160163.09 | cg01722450 | 0.00880418 | 0.11389524 | 0.0224172  | 0.57866851 |
| cg13211302 | 0.00440548 | 54.9455839 | 3.48615758 | 866.001354 | cg06924355 | 0.00880522 | 3009.19419 | 7.51324061 | 1205238.87 |
| cg09998519 | 0.00440982 | 1491.32366 | 9.74944988 | 228120.181 | cg25388707 | 0.00881206 | 1008947.44 | 32.4518535 | 3.1369E+10 |
| cg13112903 | 0.00441342 | 119.252647 | 4.43566961 | 3206.09853 | cg01871408 | 0.00881392 | 0.06294125 | 0.00794634 | 0.49854407 |
| cg02917792 | 0.00441525 | 1976294300 | 787.021657 | 4.9627E+15 | cg00168835 | 0.00881406 | 18.1182409 | 2.07325984 | 158.335509 |
| cg03065614 | 0.00441715 | 15.6418535 | 2.35517603 | 103.88505  | cg08339719 | 0.00881925 | 49693.966  | 15.1963004 | 162506017  |
| cg14829271 | 0.00441872 | 1.56E-06   | 1.56E-10   | 0.01552284 | cg11331344 | 0.00881943 | 166.000148 | 3.61946794 | 7613.28723 |
| cg26293512 | 0.00441933 | 16.263058  | 2.38367029 | 110.957903 | cg19593490 | 0.00882597 | 16.4088343 | 2.02144349 | 133.196818 |

|            |            |            |            |            |            |            |            |            |            |
|------------|------------|------------|------------|------------|------------|------------|------------|------------|------------|
| cg05286653 | 0.00441933 | 12.0014277 | 2.16841451 | 66.4237706 | cg26488040 | 0.00883614 | 141550245  | 112.074027 | 1.7878E+14 |
| cg06830784 | 0.00442313 | 6.1160985  | 1.75754534 | 21.2834685 | cg18856581 | 0.00883621 | 6.71289453 | 1.6140671  | 27.9188846 |
| cg02216011 | 0.0044262  | 70.6017619 | 3.76373099 | 1324.37966 | cg17202331 | 0.00883883 | 844.11757  | 5.44179712 | 130937.346 |
| cg16542392 | 0.00443976 | 574340887  | 530.950588 | 6.2128E+14 | cg04528624 | 0.00884361 | 3.6618E+10 | 452.184773 | 2.9653E+18 |
| cg25229048 | 0.00444041 | 0.08303248 | 0.01495255 | 0.46108491 | cg21109744 | 0.00885518 | 10.306944  | 1.79693985 | 59.1188926 |
| cg10398590 | 0.00444616 | 25.4659416 | 2.73684379 | 236.956958 | cg19245758 | 0.00886382 | 22.6887655 | 2.19027114 | 235.030298 |
| cg11934386 | 0.00444944 | 4207721435 | 982.896763 | 1.8013E+16 | cg03271650 | 0.00886867 | 249.694137 | 3.999044   | 15590.5166 |
| cg19217955 | 0.00445016 | 24790.5492 | 23.2438331 | 26440188.6 | cg09219813 | 0.00889189 | 17.9620314 | 2.06362541 | 156.343575 |
| cg22581219 | 0.00446421 | 42.9235478 | 3.21553892 | 572.977347 | cg15154229 | 0.00889449 | 28.4908361 | 2.31655783 | 350.402538 |
| cg09946603 | 0.00446682 | 0.00017502 | 4.50E-07   | 0.06807    | cg00750366 | 0.00889453 | 10.1963307 | 1.79027364 | 58.0722175 |
| cg27094166 | 0.0044736  | 264792.795 | 48.2985369 | 1451704932 | cg25544073 | 0.00889859 | 39176.3877 | 14.1818653 | 108221967  |
| cg03733196 | 0.00448063 | 30446.4385 | 24.6430185 | 37616561.4 | cg18773844 | 0.00889883 | 305.963846 | 4.20042039 | 22286.7871 |
| cg16180217 | 0.00448317 | 247.659151 | 5.5328611  | 11085.5946 | cg22673001 | 0.008905   | 2064.10501 | 6.77577551 | 628788.468 |
| cg02695343 | 0.00449755 | 13.3381557 | 2.23307174 | 79.6689129 | cg21527360 | 0.008907   | 9585.70878 | 9.95525006 | 9229884.96 |
| cg02455803 | 0.00449894 | 1663.37399 | 9.9719932  | 277458.374 | cg07932328 | 0.00891824 | 70368389.8 | 92.4893026 | 5.3538E+13 |
| cg03976754 | 0.00449933 | 5078.86255 | 14.0954407 | 1830013.36 | cg19769982 | 0.00891884 | 5.56939374 | 1.53762614 | 20.1727493 |
| cg18306747 | 0.00450073 | 474.291595 | 6.75646883 | 33294.3912 | cg18251245 | 0.00891901 | 1278673646 | 191.223554 | 8.5502E+15 |
| cg23283234 | 0.00450181 | 71852.7825 | 32.0384662 | 161144492  | cg24364084 | 0.00891925 | 253767.579 | 22.5930157 | 2850349195 |
| cg12783819 | 0.00450403 | 4.93676352 | 1.64045949 | 14.85659   | cg14993900 | 0.00892056 | 15.3317406 | 1.98156962 | 118.624281 |
| cg10139651 | 0.00451022 | 10.8705581 | 2.09471705 | 56.412886  | cg08016383 | 0.00892077 | 13.1897648 | 1.90824647 | 91.1674145 |
| cg12959265 | 0.00451198 | 0.15084158 | 0.04088712 | 0.55648778 | cg19800926 | 0.0089322  | 1.2859E+10 | 339.801887 | 4.8663E+17 |
| cg02155398 | 0.00451388 | 7.06394524 | 1.83256327 | 27.2292495 | cg26792589 | 0.00893618 | 982.648053 | 5.61216462 | 172054.325 |
| cg04330122 | 0.00451454 | 10.2200801 | 2.05468966 | 50.8349461 | cg19048532 | 0.00894416 | 39.2832547 | 2.50588794 | 615.819277 |
| cg02534163 | 0.00451559 | 5.49261855 | 1.69505164 | 17.7981944 | cg12910830 | 0.00894991 | 211.364711 | 3.81688556 | 11704.5796 |
| cg05460965 | 0.00452028 | 32.6723844 | 2.94421685 | 362.57     | cg14553243 | 0.00895042 | 12.6489713 | 1.88678099 | 84.7986474 |
| cg00214668 | 0.00452109 | 96.1610024 | 4.11286226 | 2248.29761 | cg20607710 | 0.00895592 | 2799886037 | 230.672706 | 3.3985E+16 |
| cg04294383 | 0.0045296  | 0.08965891 | 0.0169598  | 0.47398676 | cg27621997 | 0.00895691 | 14.8114022 | 1.96239531 | 111.790746 |
| cg13654525 | 0.00453043 | 37.9105558 | 3.08103533 | 466.469899 | cg15872683 | 0.0089575  | 275346.171 | 22.9389424 | 3305100662 |
| cg09601584 | 0.00453111 | 17.5262521 | 2.42640166 | 126.594668 | cg01072639 | 0.00896024 | 10.7854388 | 1.81256291 | 64.1774638 |
| cg27011534 | 0.00453491 | 3.07E-08   | 2.00E-13   | 0.00473363 | cg03423942 | 0.00897647 | 634603.81  | 28.1880895 | 1.4287E+10 |

|            |            |            |            |            |            |            |            |            |            |
|------------|------------|------------|------------|------------|------------|------------|------------|------------|------------|
| cg05346193 | 0.00453864 | 54.054043  | 3.43671762 | 850.183195 | cg15366555 | 0.00897684 | 19.4763874 | 2.10013563 | 180.621509 |
| cg19590227 | 0.00454231 | 219532.405 | 44.9102366 | 1073128993 | cg03599590 | 0.00898213 | 33.5576029 | 2.40550358 | 468.140111 |
| cg01362243 | 0.00454254 | 23.360924  | 2.65048183 | 205.899458 | cg02378269 | 0.00898782 | 12.3491314 | 1.87356308 | 81.39627   |
| cg02738049 | 0.00454257 | 8942.03266 | 16.6849316 | 4792344.97 | cg09634802 | 0.00899205 | 3762862956 | 246.220939 | 5.7506E+16 |
| cg01731839 | 0.00454665 | 21295026   | 184.669046 | 2.4556E+12 | cg09158314 | 0.008996   | 34.5721412 | 2.4221712  | 493.455189 |
| cg01476568 | 0.00454801 | 4.27230519 | 1.56685337 | 11.6492021 | cg02703870 | 0.0090046  | 10.3897594 | 1.79366344 | 60.182472  |
| cg19265600 | 0.00454838 | 61.9120809 | 3.58165686 | 1070.20463 | cg12749863 | 0.00900471 | 3.93433283 | 1.40759244 | 10.9967732 |
| cg10148273 | 0.00455004 | 456.871206 | 6.64404203 | 31416.3122 | cg20898273 | 0.00900899 | 15.1564857 | 1.97068165 | 116.568325 |
| cg15991262 | 0.00455274 | 30.7001284 | 2.88249458 | 326.972995 | cg19255465 | 0.00901536 | 47.2369026 | 2.61636283 | 852.834682 |
| cg13560901 | 0.00455343 | 20.8330896 | 2.55678455 | 169.751347 | cg02029242 | 0.00902051 | 0.10335571 | 0.01881553 | 0.56774388 |
| cg27665327 | 0.00455383 | 30.2083089 | 2.8679575  | 318.185302 | cg10883583 | 0.00902471 | 35576856.4 | 76.3990763 | 1.6567E+13 |
| cg14847134 | 0.00455409 | 47.1160251 | 3.29035723 | 674.674409 | cg26231243 | 0.00902976 | 29846155.1 | 73.0557687 | 1.2193E+13 |
| cg12552766 | 0.0045559  | 63567435.1 | 258.255374 | 1.5647E+13 | cg16463733 | 0.0090337  | 1503478.39 | 34.6594554 | 6.5219E+10 |
| cg07107420 | 0.00456259 | 9.27865048 | 1.99043437 | 43.2535511 | cg17346426 | 0.00903627 | 116.667351 | 3.2748362  | 4156.32112 |
| cg11249215 | 0.00456373 | 61331781.8 | 254.802119 | 1.4763E+13 | cg08284713 | 0.00903673 | 139221449  | 107.09953  | 1.8098E+14 |
| cg21351151 | 0.00456394 | 56933609.5 | 248.995177 | 1.3018E+13 | cg01758575 | 0.00903856 | 555.605188 | 4.8313447  | 63894.6596 |
| cg01556457 | 0.00456548 | 124301.333 | 37.490028  | 412131498  | cg17141902 | 0.00904705 | 107.321219 | 3.20562416 | 3593.01136 |
| cg20864214 | 0.00457426 | 12.3248866 | 2.17184774 | 69.9417493 | cg00561338 | 0.0090613  | 11.6117847 | 1.8413549  | 73.2251797 |
| cg25722212 | 0.00457445 | 1277.45789 | 9.10368585 | 179256.918 | cg10428938 | 0.00906753 | 5.84652457 | 1.55199228 | 22.0244972 |
| cg09743140 | 0.00457668 | 192564867  | 361.329745 | 1.0262E+14 | cg25385940 | 0.0090734  | 8.44792031 | 1.70066789 | 41.9643117 |
| cg09667023 | 0.00457688 | 6.1399E+10 | 2142.19701 | 1.7598E+18 | cg12441126 | 0.00908635 | 5.91591354 | 1.55599171 | 22.492429  |
| cg26643856 | 0.00457696 | 136.328112 | 4.56093101 | 4074.90362 | cg18661868 | 0.00908642 | 44.5271565 | 2.57053446 | 771.305618 |
| cg19019038 | 0.00457733 | 126177.513 | 37.5747998 | 423708570  | cg18130930 | 0.00909494 | 0.1346154  | 0.02983381 | 0.60740845 |
| cg05337753 | 0.0045835  | 25.437459  | 2.71508788 | 238.321686 | cg26181929 | 0.00909766 | 2338.32569 | 6.87792617 | 794973.205 |
| cg17611742 | 0.00458662 | 15.4403378 | 2.32703301 | 102.449784 | cg22761308 | 0.00910275 | 46.1304806 | 2.59149191 | 821.156816 |
| cg01973771 | 0.00458965 | 1221.72431 | 8.96267005 | 166536.343 | cg07907315 | 0.00910496 | 13.082263  | 1.89453106 | 90.3366584 |
| cg02980693 | 0.0045903  | 15.3872531 | 2.32416408 | 101.872136 | cg05794119 | 0.00910537 | 31533.7615 | 13.1204896 | 75788186.3 |
| cg17852791 | 0.00459795 | 53.8377552 | 3.4186599  | 847.847977 | cg16345031 | 0.00910837 | 4632058519 | 252.138611 | 8.5096E+16 |
| cg04102760 | 0.00460257 | 12355.5977 | 18.2634872 | 8358797.68 | cg00178359 | 0.0091115  | 10.0364947 | 1.77348536 | 56.798454  |
| cg07235774 | 0.00460338 | 58.5502362 | 3.50696707 | 977.519914 | cg07483245 | 0.00911605 | 1182.42859 | 5.7973844  | 241166.926 |

|            |            |            |            |            |            |            |            |            |            |
|------------|------------|------------|------------|------------|------------|------------|------------|------------|------------|
| cg13389876 | 0.00461391 | 795712.379 | 65.789829  | 9623952510 | cg13975303 | 0.00912279 | 14068.9546 | 10.7167846 | 18469670.6 |
| cg22037648 | 0.00461475 | 18.2169756 | 2.44547919 | 135.702729 | cg07469063 | 0.00912346 | 168.123954 | 3.56972834 | 7918.15542 |
| cg02153299 | 0.00461592 | 159129.075 | 40.0499897 | 632261397  | cg14519917 | 0.00912656 | 772.958192 | 5.21251245 | 114621.188 |
| cg18722881 | 0.00461772 | 7.3519421  | 1.84885414 | 29.2348927 | cg26279336 | 0.0091285  | 5.69751478 | 1.54027895 | 21.075192  |
| cg04062119 | 0.00461815 | 19.7178217 | 2.50543451 | 155.179666 | cg13647118 | 0.00913332 | 261328.611 | 22.1073858 | 3089132464 |
| cg19822127 | 0.00461873 | 49340259.2 | 234.328736 | 1.0389E+13 | cg18802611 | 0.00913389 | 248094913  | 121.193481 | 5.0787E+14 |
| cg23461714 | 0.00462997 | 402.100238 | 6.33502832 | 25522.3171 | cg12606911 | 0.00913449 | 9.54331253 | 1.75044082 | 52.0296448 |
| cg10683958 | 0.00463395 | 13731.006  | 18.7724406 | 10043474.4 | cg06794000 | 0.00913563 | 4094.5728  | 7.87869427 | 2127957.48 |
| cg02083373 | 0.0046359  | 1.8422E+10 | 1442.70051 | 2.3524E+17 | cg06035374 | 0.00913767 | 2003206.37 | 36.625368  | 1.0956E+11 |
| cg24490630 | 0.0046388  | 36466.0609 | 25.3340833 | 52489509   | cg25292098 | 0.00914302 | 803.51998  | 5.25667669 | 122823.677 |
| cg07671620 | 0.00463946 | 103009.41  | 34.8674181 | 304322463  | cg06403845 | 0.00914931 | 0.12107955 | 0.02474934 | 0.59234943 |
| cg14397459 | 0.00464045 | 7.9227E+12 | 9303.78341 | 6.75E+21   | cg26511108 | 0.00915062 | 0.07368694 | 0.01036767 | 0.52372079 |
| cg12260435 | 0.00464177 | 22.6491606 | 2.61147121 | 196.435049 | cg22721468 | 0.00915507 | 506066886  | 143.987959 | 1.7786E+15 |
| cg24963001 | 0.00464624 | 9.16689979 | 1.97677725 | 42.509621  | cg26738040 | 0.00916026 | 306.735675 | 4.13511315 | 22753.1318 |
| cg07268337 | 0.00464788 | 0.05207288 | 0.00672867 | 0.40298994 | cg10500406 | 0.00916253 | 275348.199 | 22.3076739 | 3398679348 |
| cg05523897 | 0.00465641 | 16.2781502 | 2.35751728 | 112.397128 | cg12621171 | 0.00916838 | 19.1875614 | 2.07949493 | 177.044198 |
| cg04986324 | 0.00466051 | 17.9388915 | 2.42849973 | 132.511371 | cg02801583 | 0.00917008 | 74843.4424 | 16.1370085 | 347123872  |
| cg25853673 | 0.00466262 | 73423.3932 | 31.280902  | 172341407  | cg15923100 | 0.0091747  | 338014978  | 129.735533 | 8.8067E+14 |
| cg17184255 | 0.00466518 | 12.3730905 | 2.16607491 | 70.6777817 | cg23637385 | 0.00919169 | 9.05597109 | 1.72546892 | 47.5294636 |
| cg21940081 | 0.00467188 | 0.00048162 | 2.42E-06   | 0.09574284 | cg12729166 | 0.00919371 | 13.3720278 | 1.90014468 | 94.1039537 |
| cg17934743 | 0.00467638 | 5.8169E+11 | 4098.20307 | 8.26E+19   | cg09239591 | 0.00919583 | 40.9898129 | 2.50712558 | 670.155803 |
| cg19367800 | 0.00468263 | 1.2965E+18 | 363080.109 | 4.63E+30   | cg16721177 | 0.00920146 | 6.48577856 | 1.58829423 | 26.4845912 |
| cg05696801 | 0.00468548 | 1026.13068 | 8.39834077 | 125375.263 | cg15243267 | 0.0092118  | 140869.398 | 18.7746287 | 1056968294 |
| cg11314310 | 0.00468862 | 4.08762684 | 1.54042148 | 10.8468321 | cg17346022 | 0.00921188 | 0.06389197 | 0.0080606  | 0.50643696 |
| cg13694725 | 0.00470531 | 393.715933 | 6.24667021 | 24815.1785 | cg17306261 | 0.00922028 | 26.6463445 | 2.25166981 | 315.333834 |
| cg03591499 | 0.00470841 | 127.136561 | 4.41603573 | 3660.22971 | cg26181939 | 0.00922044 | 16.7065897 | 2.00618291 | 139.124971 |
| cg10296162 | 0.00470955 | 33748172.2 | 203.015273 | 5.6101E+12 | cg16412592 | 0.00922395 | 1585150.16 | 34.1029342 | 7.368E+10  |
| cg03774468 | 0.00471313 | 48.7634986 | 3.29099512 | 722.540968 | cg20313628 | 0.00923074 | 31.3996614 | 2.3440295  | 420.617036 |
| cg13994177 | 0.00471531 | 0.07971986 | 0.01379479 | 0.46069987 | cg01305328 | 0.00923752 | 1206672099 | 175.324399 | 8.3049E+15 |
| cg03415695 | 0.00471585 | 1577.39755 | 9.54737327 | 260614.407 | cg18982073 | 0.00923789 | 154.800233 | 3.47561092 | 6894.64749 |

|            |            |            |            |            |            |            |            |            |            |
|------------|------------|------------|------------|------------|------------|------------|------------|------------|------------|
| cg00403955 | 0.0047169  | 300.549554 | 5.74403599 | 15725.8824 | cg25032094 | 0.00923831 | 7.12485844 | 1.62440112 | 31.2506605 |
| cg19519964 | 0.00471882 | 3422.2741  | 12.0997878 | 967947.56  | cg02384857 | 0.00924641 | 8.1716687  | 1.68005313 | 39.7464628 |
| cg21845080 | 0.00471953 | 0.11302648 | 0.02491255 | 0.51279319 | cg10059687 | 0.0092478  | 50.6816947 | 2.63657235 | 974.23239  |
| cg23917399 | 0.00472108 | 9.33946359 | 1.98258877 | 43.9958007 | cg11275803 | 0.00925293 | 44435.0538 | 14.0466483 | 140565491  |
| cg19975218 | 0.0047333  | 21.7646599 | 2.56751451 | 184.497661 | cg07194495 | 0.00926382 | 351246467  | 128.530039 | 9.5989E+14 |
| cg20346912 | 0.00473605 | 7.01406065 | 1.81522185 | 27.1024982 | cg10320160 | 0.00926584 | 0.06880359 | 0.00916363 | 0.51660031 |
| cg18340446 | 0.00474007 | 1.8739E+13 | 11522.937  | 3.05E+22   | cg14574127 | 0.0092708  | 515075.581 | 25.6582979 | 1.034E+10  |
| cg02233421 | 0.0047423  | 627213.246 | 59.4072243 | 6622030583 | cg02407720 | 0.00927452 | 8.37212791 | 1.68905762 | 41.4980075 |
| cg25818813 | 0.00474307 | 1116530.2  | 70.8587861 | 1.7593E+10 | cg25853673 | 0.00928173 | 135627.18  | 18.4351858 | 997805621  |
| cg07185648 | 0.00474711 | 70.998613  | 3.6836665  | 1368.42004 | cg09552892 | 0.00928552 | 15.4308111 | 1.96341002 | 121.273667 |
| cg02409878 | 0.00475354 | 5.01086807 | 1.63690061 | 15.3392324 | cg11235663 | 0.00928847 | 17.063138  | 2.01251634 | 144.669969 |
| cg23400797 | 0.00475566 | 1397699.57 | 75.6752299 | 2.5815E+10 | cg10449409 | 0.00929047 | 86.2343365 | 3.00028072 | 2478.555   |
| cg17475987 | 0.00475768 | 103.302333 | 4.12804767 | 2585.08933 | cg06390536 | 0.00929118 | 6.23376792 | 1.57002579 | 24.7510982 |
| cg19005368 | 0.00475776 | 11024.5262 | 17.2110412 | 7061756.3  | cg23735712 | 0.00929263 | 10.5748199 | 1.78841561 | 62.5284278 |
| cg25365260 | 0.00475901 | 9.17482068 | 1.96906419 | 42.7499189 | cg01589129 | 0.00929407 | 6.29499832 | 1.57372394 | 25.1804035 |
| cg22799396 | 0.00476088 | 13.1712289 | 2.19901273 | 78.8905256 | cg15767556 | 0.00929697 | 1082.1389  | 5.59456128 | 209314.822 |
| cg04295543 | 0.00476159 | 36.5585009 | 3.00419825 | 444.885417 | cg25551287 | 0.00930512 | 29817206.6 | 69.3984267 | 1.2811E+13 |
| cg16944093 | 0.00476275 | 26.2513494 | 2.71479765 | 253.843356 | cg23281832 | 0.00930564 | 39025.6732 | 13.5226827 | 112625816  |
| cg14482741 | 0.00476335 | 14.6564036 | 2.2717634  | 94.5565755 | cg09132763 | 0.00932701 | 75.4048962 | 2.89775863 | 1962.17115 |
| cg02951971 | 0.00477147 | 115405.893 | 35.1921484 | 378451467  | cg09168604 | 0.00932771 | 7.43942557 | 1.63868421 | 33.7740807 |
| cg09829176 | 0.00477275 | 46.0881378 | 3.22232975 | 659.186554 | cg17056132 | 0.00933248 | 64.0866445 | 2.7833829  | 1475.5778  |
| cg06945667 | 0.00478209 | 4280751.03 | 105.847499 | 1.7312E+11 | cg16613143 | 0.0093362  | 256153.436 | 21.4092108 | 3064782884 |
| cg04974640 | 0.0047834  | 5577.56988 | 13.923637  | 2234278.71 | cg13721644 | 0.00934081 | 84.137921  | 2.97503705 | 2379.52994 |
| cg22670485 | 0.00478485 | 2.82E-08   | 1.60E-13   | 0.00495811 | cg21502048 | 0.00934942 | 17.1992436 | 2.01273344 | 146.971265 |
| cg05508558 | 0.00478587 | 45.6890188 | 3.2111182  | 650.080847 | cg11247103 | 0.00935381 | 26172.1974 | 12.1912761 | 56186400.1 |
| cg07416582 | 0.00478993 | 43364151.8 | 214.14959  | 8.781E+12  | cg00551143 | 0.00935471 | 13.807552  | 1.90663179 | 99.9922963 |
| cg25625860 | 0.00480804 | 16854187.8 | 159.700517 | 1.7787E+12 | cg14847688 | 0.00935534 | 33.1486042 | 2.36458573 | 464.702948 |
| cg26402660 | 0.00481138 | 6.52260464 | 1.77116548 | 24.0205514 | cg23611233 | 0.00936425 | 13758386.2 | 56.7674256 | 3.3345E+12 |
| cg13976502 | 0.00481516 | 28.3071821 | 2.7700645  | 289.27     | cg07029862 | 0.00936696 | 433.997337 | 4.44642533 | 42360.6998 |
| cg08807101 | 0.00481851 | 7073.51035 | 14.8946077 | 3359239.1  | cg01090026 | 0.00937744 | 8.97997984 | 1.71437722 | 47.0375113 |

|            |            |            |            |            |            |            |            |            |            |
|------------|------------|------------|------------|------------|------------|------------|------------|------------|------------|
| cg00476814 | 0.00481899 | 2158.41236 | 10.3734633 | 449102.075 | cg12691534 | 0.00938205 | 11.0289977 | 1.80291832 | 67.4677212 |
| cg16161657 | 0.00482052 | 4726090.7  | 108.038539 | 2.0674E+11 | cg26220419 | 0.0093842  | 5105045.34 | 44.348165  | 5.8766E+11 |
| cg22721468 | 0.00482145 | 202188427  | 339.203631 | 1.2052E+14 | cg11441617 | 0.00938815 | 6253460.76 | 46.5827238 | 8.3949E+11 |
| cg02779075 | 0.00483017 | 72.7414398 | 3.68935556 | 1434.21174 | cg20329085 | 0.00939251 | 22.740724  | 2.15272338 | 240.226186 |
| cg06090684 | 0.00483388 | 21.6425476 | 2.55004127 | 183.683249 | cg26443922 | 0.00939268 | 1155273.99 | 30.7538201 | 4.3398E+10 |
| cg27455017 | 0.00484022 | 11.5324804 | 2.10475789 | 63.1892656 | cg19305681 | 0.00939428 | 11.6894413 | 1.82826379 | 74.7392355 |
| cg03583016 | 0.00484397 | 9.05969062 | 1.95543789 | 41.9742272 | cg20359237 | 0.00940507 | 172.559222 | 3.53747335 | 8417.50092 |
| cg25499012 | 0.00484641 | 2.73E-08   | 1.49E-13   | 0.00499417 | cg17727579 | 0.00941038 | 0.05026413 | 0.00526027 | 0.48029489 |
| cg24683514 | 0.00485748 | 293129.382 | 45.9605882 | 1869532954 | cg18252633 | 0.00941216 | 10.345729  | 1.77350322 | 60.3517977 |
| cg23414387 | 0.00486198 | 16.0085821 | 2.32339418 | 110.30186  | cg26126052 | 0.00941548 | 3560.59934 | 7.42595354 | 1707237.68 |
| cg08000847 | 0.00486236 | 56245715.1 | 226.974233 | 1.3938E+13 | cg15676837 | 0.00942128 | 29.8316852 | 2.29861655 | 387.158719 |
| cg14579118 | 0.00486317 | 16.2584362 | 2.33423219 | 113.243554 | cg24832710 | 0.00942842 | 580.779609 | 4.75656288 | 70913.591  |
| cg09925572 | 0.00486405 | 2287173372 | 699.692549 | 7.4764E+15 | cg22852309 | 0.00944984 | 31397839.9 | 68.4445971 | 1.4403E+13 |
| cg15923100 | 0.00486909 | 246301372  | 354.836849 | 1.7096E+14 | cg11276456 | 0.00946586 | 5.0629E+11 | 730.139769 | 3.51E+20   |
| cg11669397 | 0.0048695  | 173322.818 | 39.0811559 | 768677349  | cg18768283 | 0.00946604 | 2631.11504 | 6.86608113 | 1008255.83 |
| cg08734623 | 0.0048796  | 117.127494 | 4.24890472 | 3228.79678 | cg25257905 | 0.00946724 | 0.13662124 | 0.03037483 | 0.61450103 |
| cg21926750 | 0.00487971 | 292092.355 | 45.7020631 | 1866829159 | cg02268171 | 0.0094701  | 19.6009714 | 2.07056889 | 185.551943 |
| cg04915044 | 0.00488265 | 4.27986945 | 1.55504091 | 11.779293  | cg09597785 | 0.00947917 | 181989.591 | 19.3240138 | 1713940569 |
| cg07309576 | 0.00488657 | 0.13646141 | 0.03409021 | 0.54624823 | cg14679255 | 0.00949323 | 18.4580585 | 2.03891167 | 167.098912 |
| cg18978493 | 0.00489187 | 7.45381552 | 1.83983038 | 30.1980913 | cg05975928 | 0.0094945  | 0.08250523 | 0.01252308 | 0.54356535 |
| cg27427527 | 0.00490014 | 38.3272325 | 3.02274403 | 485.974576 | cg03791450 | 0.00949511 | 8.52629515 | 1.68817375 | 43.0629306 |
| cg01184452 | 0.0049004  | 19.3480265 | 2.45658588 | 152.384712 | cg06787669 | 0.00949531 | 13.19506   | 1.87824889 | 92.6978368 |
| cg13929970 | 0.00490306 | 16.7911339 | 2.35290436 | 119.8273   | cg09488991 | 0.00950169 | 8795357803 | 268.556847 | 2.8805E+17 |
| cg08290108 | 0.00490419 | 5439.21992 | 13.5842013 | 2177905.99 | cg12179176 | 0.00950428 | 19.482499  | 2.06528649 | 183.784559 |
| cg20329085 | 0.00490436 | 17.7093904 | 2.39106919 | 131.164129 | cg24050414 | 0.0095122  | 1726.90081 | 6.1715388  | 483216.019 |
| cg03395898 | 0.00490542 | 34.0380739 | 2.91496466 | 397.462958 | cg10802521 | 0.00951339 | 34941328.6 | 69.4458428 | 1.7581E+13 |
| cg11300971 | 0.00490989 | 75.087585  | 3.70432761 | 1522.04287 | cg01421695 | 0.0095151  | 683.745815 | 4.92114219 | 94999.9658 |
| cg26931437 | 0.0049102  | 15104220.7 | 150.24785  | 1.5184E+12 | cg26794902 | 0.00952428 | 7.0882E+10 | 444.454587 | 1.1304E+19 |
| cg14626797 | 0.00491294 | 2461.17766 | 10.6682708 | 567795.438 | cg03891929 | 0.00952537 | 703322.46  | 26.7176423 | 1.8514E+10 |
| cg25410636 | 0.00491366 | 64020.0243 | 28.6468187 | 143072205  | cg15448245 | 0.00952838 | 99.6498707 | 3.07324058 | 3231.14851 |

|            |            |            |            |            |            |            |            |            |            |
|------------|------------|------------|------------|------------|------------|------------|------------|------------|------------|
| cg17188384 | 0.0049144  | 12.7640414 | 2.16409668 | 75.2834915 | cg22507887 | 0.00954252 | 0.22313146 | 0.07177373 | 0.69367509 |
| cg01933251 | 0.00491741 | 15434222.9 | 150.943526 | 1.5782E+12 | cg13813874 | 0.00954367 | 3044626.72 | 38.0922405 | 2.4335E+11 |
| cg25168729 | 0.00491832 | 6229965637 | 930.129253 | 4.1728E+16 | cg21746532 | 0.00954435 | 0.10020992 | 0.01759606 | 0.57069751 |
| cg06849504 | 0.00492269 | 16.2537757 | 2.32773727 | 113.494434 | cg02494781 | 0.00954452 | 4057753.46 | 40.850214  | 4.0307E+11 |
| cg27225220 | 0.00492586 | 8.06205263 | 1.88199164 | 34.5361217 | cg05858889 | 0.00954529 | 10.9209876 | 1.79116133 | 66.5869506 |
| cg10090217 | 0.00492756 | 76106.3438 | 30.1124274 | 192351666  | cg03640883 | 0.00954606 | 0.08209018 | 0.01239585 | 0.54363348 |
| cg00636194 | 0.0049294  | 130.347057 | 4.37191737 | 3886.24802 | cg18306747 | 0.00954931 | 452.545275 | 4.43971112 | 46128.5026 |
| cg01381679 | 0.00493299 | 227986.268 | 41.9390975 | 1239362352 | cg22583148 | 0.00955818 | 10.2421045 | 1.76279696 | 59.5081039 |
| cg06323837 | 0.00493967 | 7828.80142 | 15.0927367 | 4060902.48 | cg22492271 | 0.00956314 | 0.14737967 | 0.03463054 | 0.62721424 |
| cg16215203 | 0.0049406  | 3.99721529 | 1.52112756 | 10.5038726 | cg27172150 | 0.00957903 | 35.8202077 | 2.38976595 | 536.909181 |
| cg22821834 | 0.0049423  | 11.6893578 | 2.10482049 | 64.9181655 | cg01734112 | 0.00958561 | 11.0691628 | 1.79522769 | 68.2511556 |
| cg10029130 | 0.00494884 | 940.474136 | 7.93786944 | 111426.826 | cg23818888 | 0.00958634 | 15.9344015 | 1.96163661 | 129.435366 |
| cg10129408 | 0.00495037 | 8.81222094 | 1.93174466 | 40.1995353 | cg22681784 | 0.00959183 | 44.8079981 | 2.52234111 | 795.989364 |
| cg21163128 | 0.00495136 | 8.29197477 | 1.89643915 | 36.2557615 | cg19711258 | 0.0095954  | 425.352599 | 4.36036218 | 41493.0747 |
| cg11683764 | 0.00495446 | 1119.74646 | 8.3628679  | 149928.488 | cg24495257 | 0.0096042  | 1.155E+11  | 490.106185 | 2.7221E+19 |
| cg20748955 | 0.00495595 | 17.4515391 | 2.37478063 | 128.246042 | cg04229059 | 0.00960904 | 253.216319 | 3.84041562 | 16695.7201 |
| cg15048078 | 0.00495791 | 1243739.12 | 69.7124749 | 2.219E+10  | cg18686576 | 0.00960934 | 39.4972032 | 2.44444143 | 638.194492 |
| cg22505746 | 0.00496239 | 286607.527 | 44.6813627 | 1838437093 | cg08051964 | 0.00962029 | 0.05516421 | 0.00615342 | 0.49453637 |
| cg22818988 | 0.00496803 | 404834285  | 399.769645 | 4.0996E+14 | cg26462404 | 0.00962066 | 2.9814E+10 | 351.112362 | 2.5315E+18 |
| cg08051964 | 0.00497479 | 0.06857612 | 0.01056869 | 0.44496372 | cg06769202 | 0.00963431 | 11.991566  | 1.82822502 | 78.6542434 |
| cg05319236 | 0.00498596 | 58317667.9 | 221.416526 | 1.536E+13  | cg22037648 | 0.00963749 | 16.6800374 | 1.98060455 | 140.474103 |
| cg06549777 | 0.00499015 | 1728132902 | 615.254048 | 4.854E+15  | cg08359167 | 0.00964271 | 1243.16636 | 5.64033912 | 274001.714 |
| cg24797508 | 0.00499288 | 19.6308806 | 2.45648436 | 156.87927  | cg03383158 | 0.00964382 | 727.85792  | 4.95255077 | 106970.565 |
| cg04914105 | 0.00499393 | 240.677884 | 5.2344404  | 11066.2916 | cg13254588 | 0.00964556 | 11026242   | 51.2372744 | 2.3728E+12 |
| cg13113115 | 0.0049941  | 1049.09031 | 8.1633197  | 134821.436 | cg07048608 | 0.00965191 | 0.14517537 | 0.03366551 | 0.62603799 |
| cg20929545 | 0.00499418 | 8.70191405 | 1.92146384 | 39.4091768 | cg19866195 | 0.009656   | 16.7776859 | 1.98233301 | 141.999726 |
| cg00089453 | 0.0049958  | 43.3006953 | 3.11853217 | 601.228435 | cg05529506 | 0.00966079 | 11.5660097 | 1.81102449 | 73.8656944 |
| cg21649629 | 0.00499587 | 6.53035031 | 1.76187386 | 24.2046132 | cg13168437 | 0.00966561 | 5688.75554 | 8.14261773 | 3974390.13 |
| cg02590886 | 0.00499631 | 120.282708 | 4.24482231 | 3408.37116 | cg07315894 | 0.00967339 | 19.2486222 | 2.04843239 | 180.874633 |
| cg17719053 | 0.00500544 | 26.1650003 | 2.67730384 | 255.707713 | cg24676409 | 0.00967603 | 5.7287E+14 | 3783.58246 | 8.67E+25   |

|            |            |            |            |            |            |            |            |            |            |
|------------|------------|------------|------------|------------|------------|------------|------------|------------|------------|
| cg02776498 | 0.00500789 | 19.5663947 | 2.45229106 | 156.116787 | cg13179508 | 0.00967718 | 7266437454 | 245.8292   | 2.1479E+17 |
| cg16320779 | 0.00501121 | 6343.87126 | 14.0198064 | 2870560.51 | cg21784917 | 0.0096777  | 11.3742643 | 1.80292121 | 71.7579268 |
| cg06250108 | 0.00501842 | 387.358259 | 6.02897636 | 24887.545  | cg26699183 | 0.00968946 | 2.2021E+14 | 2986.98009 | 1.62E+25   |
| cg19789653 | 0.00502292 | 13.9287593 | 2.21195015 | 87.7100848 | cg25261228 | 0.00970082 | 53.99077   | 2.62743099 | 1109.44997 |
| cg09915099 | 0.00502672 | 1459.7708  | 8.98511815 | 237162.246 | cg14328907 | 0.00970832 | 3081376984 | 198.259172 | 4.7891E+16 |
| cg03893150 | 0.00503    | 9.60262848 | 1.97688486 | 46.6443319 | cg26542888 | 0.009717   | 128.517271 | 3.2388515  | 5099.55113 |
| cg14611402 | 0.00503122 | 20.2460672 | 2.47490235 | 165.624005 | cg16201038 | 0.00971732 | 6.3377501  | 1.56341444 | 25.6918929 |
| cg02944245 | 0.00503776 | 12213362   | 136.236915 | 1.0949E+12 | cg08695855 | 0.00972012 | 13.8815822 | 1.88992815 | 101.960662 |
| cg06798491 | 0.00504084 | 1075.26989 | 8.18150235 | 141319.44  | cg27648075 | 0.0097215  | 8.03163077 | 1.65550223 | 38.9652708 |
| cg24654028 | 0.00504346 | 40.6990855 | 3.05211952 | 542.709927 | cg11279444 | 0.00972567 | 5.42975531 | 1.50576927 | 19.5795221 |
| cg10118908 | 0.00504528 | 0.00039175 | 1.63E-06   | 0.09426447 | cg04567169 | 0.00972576 | 3.99E+10   | 366.929909 | 4.3388E+18 |
| cg04848925 | 0.00505247 | 15.8489317 | 2.29675586 | 109.366711 | cg04680150 | 0.00972874 | 319.174498 | 4.03362754 | 25255.7677 |
| cg03791450 | 0.00505996 | 7.5159361  | 1.83444358 | 30.7936947 | cg11637682 | 0.00972989 | 15.1438853 | 1.92961996 | 118.851    |
| cg13344237 | 0.00506004 | 4552.90726 | 12.6021421 | 1644876.28 | cg25818813 | 0.00973097 | 8118902.42 | 46.8995068 | 1.4055E+12 |
| cg26419426 | 0.00506241 | 1237264.45 | 67.9884787 | 2.2516E+10 | cg10962407 | 0.00973753 | 20138931.9 | 58.3573725 | 6.9499E+12 |
| cg10357841 | 0.00506545 | 3978.74083 | 12.0927407 | 1309081.13 | cg18797229 | 0.00973808 | 481200.212 | 23.6558441 | 9788432942 |
| cg08973102 | 0.00507851 | 16654.429  | 18.5624091 | 14942565.1 | cg02764409 | 0.00974627 | 2389975196 | 184.849798 | 3.0901E+16 |
| cg09920051 | 0.00507865 | 7.6843E+15 | 59406.4799 | 9.94E+26   | cg14125530 | 0.00974868 | 19.6420285 | 2.05371042 | 187.859632 |
| cg26668837 | 0.00507958 | 12.7645156 | 2.14957431 | 75.7977331 | cg11404945 | 0.00975216 | 153.863192 | 3.37684427 | 7010.65255 |
| cg10147797 | 0.00508439 | 4.66438243 | 1.58825606 | 13.6983349 | cg15014976 | 0.00975372 | 0.11642113 | 0.02278965 | 0.59473846 |
| cg03918756 | 0.00508705 | 0.18722656 | 0.05798306 | 0.60455212 | cg11391462 | 0.00975511 | 0.07132058 | 0.00962742 | 0.52834753 |
| cg02535674 | 0.00509331 | 37.2546407 | 2.96343509 | 468.344408 | cg24952959 | 0.00975841 | 0.00039976 | 1.06E-06   | 0.15102892 |
| cg19486585 | 0.00510251 | 198505423  | 309.352747 | 1.2738E+14 | cg15746396 | 0.00976146 | 4278.51208 | 7.53589806 | 2429128.61 |
| cg09067715 | 0.00510313 | 0.00023476 | 6.77E-07   | 0.08141971 | cg08021273 | 0.00976829 | 3428.50761 | 7.13921954 | 1646491.51 |
| cg24421668 | 0.00510423 | 19.3563404 | 2.4332461  | 153.978635 | cg21789849 | 0.00976953 | 36309.8805 | 12.62082   | 104462897  |
| cg08381955 | 0.00510448 | 66.4921186 | 3.52387913 | 1254.6406  | cg18226096 | 0.00977643 | 111.166565 | 3.11806639 | 3963.3554  |
| cg15837832 | 0.00510497 | 3682.56273 | 11.7540953 | 1153748.36 | cg14483317 | 0.00978111 | 756443179  | 138.947493 | 4.1181E+15 |
| cg07604732 | 0.00510524 | 24.9444979 | 2.62555565 | 236.989063 | cg24475782 | 0.00978474 | 9.40776713 | 1.71755178 | 51.5303723 |
| cg21339084 | 0.00511325 | 29.4840405 | 2.75946964 | 315.027436 | cg07138603 | 0.00978624 | 6.56997723 | 1.57496819 | 27.4066492 |
| cg24234651 | 0.00511351 | 5.74430062 | 1.68943704 | 19.5313521 | cg01410292 | 0.00978637 | 184129.544 | 18.6391543 | 1818949955 |



|            |            |            |            |            |            |            |            |            |            |
|------------|------------|------------|------------|------------|------------|------------|------------|------------|------------|
| cg19651192 | 0.00511797 | 4921.74775 | 12.8007046 | 1892364.66 | cg08958015 | 0.00979059 | 7.66688528 | 1.63460116 | 35.9605336 |
| cg08632164 | 0.00512112 | 3.77296889 | 1.48906455 | 9.55989065 | cg21126828 | 0.00979954 | 7529.70909 | 8.6080083  | 6586485.17 |
| cg03867797 | 0.0051275  | 30312.2552 | 22.0457163 | 41678519.5 | cg15087448 | 0.00980006 | 29.0714637 | 2.2537923  | 374.990189 |
| cg09477740 | 0.00512902 | 27.0926301 | 2.68812774 | 273.056446 | cg17873465 | 0.00980034 | 9.9376E+10 | 448.697737 | 2.201E+19  |
| cg04528624 | 0.00513154 | 3.7689E+10 | 1477.24718 | 9.6158E+17 | cg03045231 | 0.00980242 | 0.07872985 | 0.01144055 | 0.54179116 |
| cg10663408 | 0.0051379  | 0.00265345 | 4.16E-05   | 0.16913475 | cg10602180 | 0.00981532 | 12.6990063 | 1.84501119 | 87.4058449 |
| cg01176915 | 0.00513972 | 2561.1316  | 10.4952051 | 624989.696 | cg06250108 | 0.00982597 | 331.541263 | 4.04716196 | 27159.6764 |
| cg18789887 | 0.00514103 | 10.39559   | 2.01639089 | 53.5949113 | cg02528389 | 0.00982736 | 2230293219 | 178.53048  | 2.7862E+16 |
| cg26202340 | 0.00514283 | 19.2098499 | 2.42334304 | 152.276557 | cg15728769 | 0.00982829 | 7339.71235 | 8.53252532 | 6313649.87 |
| cg21830368 | 0.00514332 | 9.77490252 | 1.97938668 | 48.2718814 | cg27011534 | 0.00983526 | 2.31E-09   | 6.39E-16   | 0.00832395 |
| cg15103181 | 0.00515065 | 58.5827538 | 3.38243334 | 1014.63612 | cg12938159 | 0.00984001 | 13.2243557 | 1.86189747 | 93.9276121 |
| cg06763124 | 0.00515886 | 0.01655592 | 0.00093515 | 0.29310656 | cg03107888 | 0.00984409 | 14.0889054 | 1.89028941 | 105.008923 |
| cg08788576 | 0.00516037 | 2.2124E+11 | 2481.18711 | 1.9728E+19 | cg00016066 | 0.00984619 | 3845510    | 38.4431072 | 3.8467E+11 |
| cg24073738 | 0.00517384 | 61853009.6 | 213.657681 | 1.7906E+13 | cg05973813 | 0.00986279 | 2.4755E+13 | 1664.16458 | 3.68E+23   |
| cg15737290 | 0.00517568 | 14.1118057 | 2.20651611 | 90.2522578 | cg08867933 | 0.00986415 | 0.11382968 | 0.02185093 | 0.59298154 |
| cg02153089 | 0.00517606 | 92760088.6 | 241.028226 | 3.5699E+13 | cg03278488 | 0.00986758 | 117.236093 | 3.14420112 | 4371.31751 |
| cg04466743 | 0.00518026 | 18.1791654 | 2.3795918  | 138.881826 | cg08074851 | 0.00986782 | 8.6721252  | 1.68101687 | 44.7382516 |
| cg08296969 | 0.00519211 | 132720.114 | 33.9125566 | 519413177  | cg02155796 | 0.00987231 | 1564700395 | 162.320776 | 1.5083E+16 |
| cg27559724 | 0.00519313 | 1401441.01 | 68.5569107 | 2.8648E+10 | cg13021277 | 0.00989278 | 14221.9247 | 9.94285873 | 20342554.1 |
| cg24568647 | 0.00519519 | 1.1865E+11 | 2030.74113 | 6.9326E+18 | cg18975124 | 0.00989661 | 490466699  | 122.202514 | 1.9685E+15 |
| cg24363820 | 0.00519794 | 10.255337  | 2.00403905 | 52.4799841 | cg25189267 | 0.00989709 | 4292.54735 | 7.4540321  | 2471945.73 |
| cg00142642 | 0.00520061 | 28.335725  | 2.71430691 | 295.807858 | cg08427573 | 0.00990111 | 5824.16087 | 8.01788136 | 4230650.01 |
| cg13050981 | 0.00520298 | 17.9529711 | 2.36827305 | 136.0946   | cg03277051 | 0.00990167 | 10289.6994 | 9.19144296 | 11519183.1 |
| cg02611419 | 0.00520372 | 0.11389084 | 0.02481184 | 0.52277956 | cg11399508 | 0.00990678 | 12.7121833 | 1.84105573 | 87.7755092 |
| cg23264429 | 0.00520707 | 0.16724048 | 0.04769913 | 0.58637079 | cg21841239 | 0.00991632 | 60.0602862 | 2.67161446 | 1350.20904 |
| cg27639662 | 0.00520928 | 19.4682842 | 2.42555891 | 156.258455 | cg17903246 | 0.00991667 | 547613.904 | 23.8194698 | 1.259E+10  |
| cg03232620 | 0.00521098 | 5.23680417 | 1.63905304 | 16.7316842 | cg23400797 | 0.00991943 | 1205220.55 | 28.7715995 | 5.0486E+10 |
| cg26860994 | 0.00521153 | 4.7801E+10 | 1538.16019 | 1.4855E+18 | cg27233566 | 0.00992108 | 463.490627 | 4.36102856 | 49259.8382 |
| cg02801583 | 0.00521411 | 81221.166  | 29.172016  | 226137192  | cg26836793 | 0.0099228  | 1211205968 | 150.981294 | 9.7166E+15 |
| cg16936060 | 0.00521638 | 0.04981557 | 0.00607253 | 0.40865866 | cg26328687 | 0.00992284 | 45.3640626 | 2.49700091 | 824.147947 |

|            |            |            |            |            |            |            |            |            |            |
|------------|------------|------------|------------|------------|------------|------------|------------|------------|------------|
| cg20807701 | 0.00521838 | 2367.84617 | 10.1537962 | 552177.274 | cg07235774 | 0.00992694 | 97.4141593 | 2.9988515  | 3164.38424 |
| cg27614280 | 0.00521928 | 2.19E-05   | 1.17E-08   | 0.04071756 | cg27124616 | 0.00992893 | 151.756875 | 3.33492704 | 6905.74302 |
| cg08391942 | 0.00522173 | 9323743134 | 940.986682 | 9.2384E+16 | cg14719951 | 0.00993682 | 6.57885276 | 1.57088298 | 27.5522137 |
| cg10497871 | 0.00522178 | 9.30478401 | 1.94504967 | 44.5124907 | cg04377289 | 0.00994388 | 8.96218394 | 1.69146619 | 47.4858685 |
| cg21734015 | 0.00522274 | 4203.09996 | 12.0428302 | 1466935.01 | cg11831182 | 0.00994897 | 3629189.64 | 37.3109264 | 3.5301E+11 |
| cg10732920 | 0.00523036 | 2937924.92 | 84.7859524 | 1.018E+11  | cg01268571 | 0.0099606  | 10.5622048 | 1.75867696 | 63.4341456 |
| cg25121621 | 0.00523067 | 4837.31287 | 12.5451868 | 1865224.97 | cg11686214 | 0.00996872 | 1.5181E+10 | 273.870138 | 8.4152E+17 |
| cg16167741 | 0.00523576 | 6.38218689 | 1.73747625 | 23.4433762 | cg18301048 | 0.0099693  | 3396.40521 | 7.00412658 | 1646967.43 |
| cg14039939 | 0.00523749 | 27528.4806 | 21.0448215 | 36009677.8 | cg00531137 | 0.00997437 | 7.64940809 | 1.62742732 | 35.9545668 |
| cg24475782 | 0.0052379  | 7.7611785  | 1.841666   | 32.7072834 | cg20666271 | 0.00997838 | 1.6942E+11 | 486.697225 | 5.8975E+19 |
| cg06794000 | 0.00523949 | 2973.32076 | 10.8389923 | 815632.681 | cg08575233 | 0.00998331 | 234.700904 | 3.69130724 | 14922.766  |
| cg04022379 | 0.00524508 | 5.65200586 | 1.67526315 | 19.0687476 | cg26502485 | 0.00999259 | 19802.1511 | 10.6572125 | 36794348.2 |
| cg13741249 | 0.00525428 | 416379247  | 368.585188 | 4.7037E+14 | cg02376018 | 0.01000047 | 1147.38668 | 5.38943928 | 244273.315 |
| cg27323009 | 0.00525976 | 23.780613  | 2.56842645 | 220.180552 | cg23025703 | 0.01000836 | 47.7808253 | 2.5197424  | 906.047884 |
| cg13813247 | 0.00526236 | 0.00379325 | 7.56E-05   | 0.19029611 | cg10453019 | 0.01001224 | 15.2137918 | 1.91654118 | 120.769365 |
| cg17603057 | 0.00526308 | 263732.119 | 41.0644147 | 1693793306 | cg03629151 | 0.01001275 | 16.4304273 | 1.9520729  | 138.293473 |
| cg20935945 | 0.00526326 | 1552.2386  | 8.90625466 | 270533.998 | cg00054210 | 0.01001487 | 14.1876132 | 1.88468905 | 106.801898 |
| cg09244244 | 0.0052635  | 19.7738484 | 2.4307414  | 160.858362 | cg15535174 | 0.01001512 | 102.175107 | 3.02073227 | 3456.03368 |
| cg25308662 | 0.00526411 | 0.01951946 | 0.00122943 | 0.30990615 | cg09424275 | 0.01001706 | 44131842   | 67.0630156 | 2.9042E+13 |
| cg17736030 | 0.00526835 | 838.056134 | 7.40962377 | 94787.2802 | cg15227302 | 0.01002162 | 7910085.6  | 44.4418018 | 1.4079E+12 |
| cg23089445 | 0.00526868 | 30.9126958 | 2.77568814 | 344.2731   | cg14183329 | 0.01003318 | 9.00266874 | 1.68990134 | 47.9602225 |
| cg10962407 | 0.00527347 | 959124.954 | 60.1706929 | 1.5289E+10 | cg12578480 | 0.01003619 | 31511.2299 | 11.8548167 | 83759845.5 |
| cg21370255 | 0.00527987 | 5.66023311 | 1.67442515 | 19.1338734 | cg17013432 | 0.01003732 | 670727.241 | 24.5965199 | 1.829E+10  |
| cg18076651 | 0.00528032 | 727.580758 | 7.09577779 | 74604.0497 | cg13116840 | 0.01004147 | 29334824.6 | 60.5685434 | 1.4208E+13 |
| cg00671759 | 0.00528053 | 38252.5045 | 23.0499791 | 63481797.2 | cg08247347 | 0.01004426 | 1.0466E+10 | 246.117466 | 4.4503E+17 |
| cg16368146 | 0.00528319 | 11.2228796 | 2.05215056 | 61.3761134 | cg20632873 | 0.01005211 | 2746.96305 | 6.61274264 | 1141100.82 |
| cg03111114 | 0.00528523 | 28.4514499 | 2.70568824 | 299.178962 | cg24700222 | 0.01006105 | 13.8102204 | 1.87027465 | 101.975497 |
| cg24330818 | 0.00528824 | 148.640165 | 4.42215598 | 4996.18257 | cg17613375 | 0.01006427 | 2175.2313  | 6.24871721 | 757216.408 |
| cg09565670 | 0.00528919 | 10.5077437 | 2.01193075 | 54.8789648 | cg27219362 | 0.01006604 | 0.11699516 | 0.0228299  | 0.59955894 |
| cg03774026 | 0.00529261 | 479.31171  | 6.26024649 | 36698.19   | cg07703790 | 0.01006634 | 184.030272 | 3.46728787 | 9767.61727 |

|            |            |            |            |            |            |            |            |            |            |
|------------|------------|------------|------------|------------|------------|------------|------------|------------|------------|
| cg11577646 | 0.00530149 | 2656.3987  | 10.402039  | 678372.197 | cg13411897 | 0.01007482 | 12944.2511 | 9.55075336 | 17543499.4 |
| cg22303873 | 0.00530645 | 17523198.9 | 141.585471 | 2.1687E+12 | cg24309428 | 0.01007844 | 9.65921874 | 1.71674755 | 54.3472491 |
| cg09797971 | 0.00530797 | 85.1553122 | 3.74230165 | 1937.69179 | cg23782001 | 0.01008223 | 20.1092358 | 2.04428818 | 197.810352 |
| cg00076353 | 0.00531015 | 405314.514 | 46.2313527 | 3553429555 | cg02492791 | 0.01008904 | 15.4424327 | 1.91927244 | 124.249545 |
| cg27310963 | 0.00531135 | 253.4081   | 5.17180883 | 12416.4808 | cg08854306 | 0.01009284 | 228646.656 | 18.8919284 | 2767281987 |
| cg22761176 | 0.00531175 | 5.54303479 | 1.66263918 | 18.479797  | cg11970289 | 0.0100934  | 9.13559979 | 1.69352851 | 49.2812392 |
| cg01350077 | 0.00531406 | 4.74880315 | 1.58794342 | 14.2014703 | cg24168884 | 0.01009537 | 43.4664761 | 2.45517082 | 769.532828 |
| cg26044340 | 0.00531698 | 7.16613441 | 1.79407933 | 28.6238638 | cg07138491 | 0.01009626 | 27.5841592 | 2.20313316 | 345.365342 |
| cg23600533 | 0.00531841 | 17412.9571 | 18.136907  | 16717904.3 | cg05021798 | 0.01009742 | 173.007759 | 3.41104583 | 8774.92892 |
| cg27072683 | 0.00532086 | 674.72439  | 6.91023641 | 65880.9591 | cg02281514 | 0.01010535 | 101.49904  | 3.00317694 | 3430.3857  |
| cg25413906 | 0.00532555 | 1095645839 | 480.517813 | 2.4982E+15 | cg14520423 | 0.01010995 | 360.699905 | 4.06009477 | 32044.6761 |
| cg10328157 | 0.00532991 | 6.27259798 | 1.72392171 | 22.8232438 | cg08144943 | 0.01011034 | 48.9045837 | 2.52357244 | 947.727227 |
| cg04064094 | 0.00533557 | 22865.4444 | 19.6121158 | 26658446.9 | cg02619315 | 0.01011153 | 3364.70856 | 6.9045097  | 1639691.18 |
| cg14266050 | 0.00534087 | 857.433957 | 7.40413451 | 99294.9262 | cg20314660 | 0.0101116  | 2.6171E+11 | 520.53914  | 1.32E+20   |
| cg08877188 | 0.00534113 | 19.4503063 | 2.41026551 | 156.959643 | cg06117133 | 0.0101203  | 3241374.94 | 35.3757267 | 2.97E+11   |
| cg07352001 | 0.00534527 | 2.6868E+17 | 146314.439 | 4.93E+29   | cg22614265 | 0.01012478 | 1733910494 | 157.494601 | 1.9089E+16 |
| cg26332715 | 0.00534763 | 586372873  | 396.458578 | 8.6726E+14 | cg03363417 | 0.01013115 | 0.04257025 | 0.00383845 | 0.47212452 |
| cg09761352 | 0.00534787 | 33135091.9 | 169.197838 | 6.4891E+12 | cg22755785 | 0.01013184 | 0.00023964 | 4.17E-07   | 0.13779382 |
| cg16976499 | 0.00534875 | 66.2685042 | 3.46466489 | 1267.51498 | cg04903089 | 0.01013527 | 0.05160218 | 0.00538714 | 0.49428568 |
| cg05691004 | 0.00534953 | 0.0923173  | 0.01726414 | 0.49365234 | cg08263387 | 0.01013882 | 2113301.92 | 31.8661978 | 1.4015E+11 |
| cg15997906 | 0.00535036 | 5.16011262 | 1.62609682 | 16.3746475 | cg08230658 | 0.01014465 | 116.990906 | 3.10056285 | 4414.31854 |
| cg18191162 | 0.00535085 | 55.2050224 | 3.28170609 | 928.661621 | cg26570179 | 0.01015023 | 4.98157028 | 1.46443771 | 16.9457822 |
| cg05206690 | 0.00535252 | 276943104  | 316.978503 | 2.4196E+14 | cg20312228 | 0.01015081 | 14.2401917 | 1.87944669 | 107.895085 |
| cg00811132 | 0.00535301 | 11.166956  | 2.04380404 | 61.0141209 | cg10056854 | 0.01015121 | 1771696.5  | 30.5032676 | 1.029E+11  |
| cg23971226 | 0.00535827 | 0.19305593 | 0.0606621  | 0.61439672 | cg05308135 | 0.01015769 | 0.07065841 | 0.00936787 | 0.5329502  |
| cg19815813 | 0.00535844 | 5.51556679 | 1.65815983 | 18.3465288 | cg10534672 | 0.01015952 | 165.420915 | 3.36398704 | 8134.41873 |
| cg06263843 | 0.00536601 | 80.8850976 | 3.67118095 | 1782.09658 | cg23356310 | 0.0101668  | 0.1028977  | 0.01816625 | 0.58283577 |
| cg21129181 | 0.0053687  | 7.67323832 | 1.82790216 | 32.2110163 | cg27018309 | 0.0101671  | 0.07038323 | 0.00930132 | 0.53259104 |
| cg18315708 | 0.005369   | 34.5643999 | 2.8538145  | 418.631885 | cg17742273 | 0.01018261 | 0.04285709 | 0.00387778 | 0.47365509 |
| cg19116747 | 0.00537892 | 6867233763 | 813.10144  | 5.7999E+16 | cg18353597 | 0.01018265 | 428204864  | 111.625294 | 1.6426E+15 |

|            |            |            |            |            |            |            |            |            |            |
|------------|------------|------------|------------|------------|------------|------------|------------|------------|------------|
| cg00144465 | 0.00538063 | 248422790  | 304.397678 | 2.0274E+14 | cg26605335 | 0.01018479 | 15.3077777 | 1.91021151 | 122.671263 |
| cg24577131 | 0.00538124 | 6.93829397 | 1.77357298 | 27.1429051 | cg11267546 | 0.01019353 | 10.0605308 | 1.72882272 | 58.5452049 |
| cg26900458 | 0.00538436 | 320.87371  | 5.51154899 | 18680.7625 | cg00465883 | 0.0101964  | 0.06133733 | 0.00729256 | 0.51590493 |
| cg11904590 | 0.00538718 | 122452.721 | 31.9594893 | 469177360  | cg09015232 | 0.01019823 | 0.08621251 | 0.01328915 | 0.55929814 |
| cg00725244 | 0.00538923 | 257.16446  | 5.16018818 | 12816.1139 | cg17665193 | 0.01019843 | 0.02195046 | 0.00119151 | 0.40438069 |
| cg23611233 | 0.00539192 | 10728358.7 | 119.823517 | 9.6056E+11 | cg09201719 | 0.01021147 | 26.8130315 | 2.17993554 | 329.798128 |
| cg19896655 | 0.00539245 | 8170478733 | 851.971999 | 7.8356E+16 | cg27392771 | 0.0102152  | 32.7187979 | 2.28492078 | 468.515035 |
| cg03071876 | 0.00539926 | 15.5029596 | 2.24805561 | 106.910948 | cg19870284 | 0.01021947 | 0.1187422  | 0.02335641 | 0.6036764  |
| cg09622420 | 0.00539973 | 2750.16621 | 10.3853271 | 728278.859 | cg17328794 | 0.01022519 | 331304.317 | 20.2881805 | 5410172191 |
| cg09375033 | 0.00540029 | 0.1379163  | 0.03415779 | 0.55685405 | cg10296301 | 0.01022648 | 0.06067556 | 0.00714835 | 0.51501721 |
| cg01466825 | 0.00540214 | 698.380901 | 6.92467284 | 70434.502  | cg14373380 | 0.01023011 | 27896.0772 | 11.2856734 | 68953894.1 |
| cg09988062 | 0.00540321 | 720.439787 | 6.98784664 | 74276.5996 | cg14777341 | 0.01023141 | 16.1241228 | 1.93137378 | 134.612647 |
| cg23451876 | 0.00540601 | 63.0340562 | 3.40133438 | 1168.15691 | cg26738606 | 0.01023981 | 16.449495  | 1.94007094 | 139.472161 |
| cg18132916 | 0.00540678 | 5.937171   | 1.69250498 | 20.8271172 | cg05481243 | 0.01024703 | 1963.15808 | 6.01283759 | 640960.209 |
| cg17742273 | 0.00540972 | 0.04856607 | 0.00576354 | 0.40923885 | cg05966809 | 0.01025205 | 114728.577 | 15.7329935 | 836626955  |
| cg14273450 | 0.00541386 | 6.18258368 | 1.71254245 | 22.3202298 | cg04100696 | 0.0102819  | 6.1204818  | 1.53415674 | 24.4175165 |
| cg12045829 | 0.00541402 | 9.90278404 | 1.96813911 | 49.8263212 | cg12619880 | 0.01028222 | 44.2762994 | 2.4484155  | 800.677291 |
| cg08718695 | 0.00541459 | 4.9478E+15 | 43108.3396 | 5.68E+26   | cg27275781 | 0.01028229 | 1770307843 | 153.008888 | 2.0482E+16 |
| cg07703790 | 0.00541551 | 98.3078812 | 3.87600047 | 2493.40514 | cg12821724 | 0.01028279 | 63.8854827 | 2.66987485 | 1528.66899 |
| cg13605674 | 0.00541654 | 0.07739506 | 0.01275136 | 0.46975332 | cg14714537 | 0.01028637 | 17.0692962 | 1.95453073 | 149.069476 |
| cg00924576 | 0.00541669 | 6.3946E+13 | 11923.8487 | 3.43E+23   | cg05022341 | 0.01028673 | 34445.1052 | 11.7931051 | 100606690  |
| cg12265604 | 0.00541876 | 11545710.9 | 121.642892 | 1.0959E+12 | cg15628498 | 0.0102925  | 2609311972 | 167.321531 | 4.0691E+16 |
| cg25347419 | 0.00542128 | 5.50512578 | 1.65452541 | 18.3172828 | cg24812936 | 0.01029411 | 5302965.4  | 38.7054352 | 7.2655E+11 |
| cg02926368 | 0.00542678 | 645.919165 | 6.75034251 | 61805.9849 | cg15431544 | 0.01029974 | 18.9350395 | 2.00222005 | 179.069089 |
| cg26918305 | 0.00543091 | 389.200769 | 5.81081641 | 26068.1508 | cg17327665 | 0.01030311 | 425355581  | 108.796264 | 1.663E+15  |
| cg27464144 | 0.00543423 | 12.7559197 | 2.11927508 | 76.777899  | cg26969942 | 0.01031261 | 3.7845E+10 | 313.10034  | 4.5745E+18 |
| cg23179456 | 0.00543764 | 3.01546594 | 1.38479607 | 6.56633497 | cg10560368 | 0.010316   | 69308234.4 | 70.7326958 | 6.7912E+13 |
| cg22510727 | 0.00544015 | 18.3465785 | 2.35851226 | 142.715791 | cg09653271 | 0.0103242  | 35041.0211 | 11.7945137 | 104105450  |
| cg16647169 | 0.0054411  | 2.1935E+10 | 1120.94239 | 4.2924E+17 | cg25062542 | 0.01032495 | 10915.795  | 8.95786353 | 13301674   |
| cg02673418 | 0.00544941 | 514.184468 | 6.29742435 | 41983.1431 | cg10315334 | 0.01032771 | 35.5003571 | 2.32013841 | 543.18973  |

|            |            |            |            |            |            |            |            |            |            |
|------------|------------|------------|------------|------------|------------|------------|------------|------------|------------|
| cg24214699 | 0.00545061 | 6.97192978 | 1.77248176 | 27.4235854 | cg01864807 | 0.01033076 | 1327718.22 | 27.766362  | 6.3488E+10 |
| cg07117311 | 0.00545147 | 28.0836309 | 2.67250649 | 295.112593 | cg17987601 | 0.01033687 | 14696.5703 | 9.5976345  | 22504418   |
| cg13722431 | 0.00545373 | 5.34976543 | 1.6392505  | 17.4591926 | cg22628873 | 0.01034084 | 20.1515637 | 2.02935731 | 200.105479 |
| cg15911239 | 0.00545427 | 12127.2818 | 15.9764429 | 9205488.61 | cg07361448 | 0.01035222 | 4.18E-07   | 5.57E-12   | 0.03145391 |
| cg27201679 | 0.00545516 | 6.14267993 | 1.70733016 | 22.1003047 | cg13884871 | 0.01035649 | 118383.346 | 15.6574231 | 895078105  |
| cg23217940 | 0.00545585 | 0.08065344 | 0.01365956 | 0.47622167 | cg25598759 | 0.01035982 | 8029862.35 | 42.244956  | 1.5263E+12 |
| cg10879207 | 0.00545888 | 10.263365  | 1.98589149 | 53.0425063 | cg07470489 | 0.01036161 | 30.777844  | 2.24074386 | 422.750542 |
| cg18773844 | 0.00547076 | 205.974282 | 4.80066837 | 8837.39541 | cg22173752 | 0.01036595 | 10.2013712 | 1.7275706  | 60.2394917 |
| cg27090191 | 0.0054708  | 143945532  | 252.449904 | 8.2077E+13 | cg24837744 | 0.01037807 | 74959888.2 | 71.2463939 | 7.8867E+13 |
| cg19337852 | 0.00547682 | 979075.839 | 58.0025668 | 1.6527E+10 | cg06487247 | 0.01037829 | 91.876119  | 2.89661901 | 2914.16344 |
| cg27035169 | 0.00547945 | 8.47370645 | 1.87563982 | 38.2822438 | cg06313718 | 0.01037954 | 1534.97373 | 5.61782366 | 419405.181 |
| cg25345422 | 0.00548366 | 159.564753 | 4.44862751 | 5723.31807 | cg00506625 | 0.01038668 | 3476683.09 | 34.5478186 | 3.4987E+11 |
| cg17162095 | 0.0054854  | 0.00256685 | 3.81E-05   | 0.17288994 | cg09303936 | 0.01039216 | 24.9781531 | 2.13116347 | 292.754704 |
| cg13711394 | 0.00548879 | 9.96016916 | 1.96638331 | 50.4504738 | cg03169836 | 0.01039239 | 80.3504282 | 2.80496135 | 2301.70419 |
| cg06469542 | 0.00549536 | 16.6234799 | 2.2855415  | 120.907927 | cg18270343 | 0.01039244 | 12.7078384 | 1.81804214 | 88.8258603 |
| cg23813257 | 0.00550146 | 345.495862 | 5.57532894 | 21409.9279 | cg22547764 | 0.01039297 | 1.03E-05   | 1.58E-09   | 0.0672246  |
| cg05987251 | 0.00551602 | 6.28052109 | 1.71564085 | 22.9913768 | cg02247068 | 0.01040488 | 35.9429812 | 2.32051042 | 556.730054 |
| cg04320760 | 0.00551921 | 214.609313 | 4.84009981 | 9515.74538 | cg23666491 | 0.01041125 | 2904.50169 | 6.51079014 | 1295715.25 |
| cg27334900 | 0.00552814 | 23.7013659 | 2.53288734 | 221.78434  | cg18270926 | 0.01041621 | 31.6447157 | 2.25120553 | 444.823014 |
| cg26507725 | 0.00552965 | 6.89340395 | 1.76252163 | 26.9608142 | cg01262913 | 0.01041854 | 13.4929335 | 1.84260215 | 98.8055152 |
| cg08437570 | 0.00553117 | 14.6798487 | 2.2002982  | 97.9403418 | cg02818811 | 0.01041873 | 8.46564883 | 1.6515081  | 43.3950098 |
| cg10448562 | 0.00553612 | 1933.1603  | 9.2132669  | 405622.544 | cg17139983 | 0.01042109 | 141651.078 | 16.2088427 | 1237906257 |
| cg26738606 | 0.00553929 | 13.8141864 | 2.16070074 | 88.3193775 | cg05159804 | 0.01042346 | 14.2895357 | 1.86735175 | 109.347814 |
| cg06510830 | 0.00554031 | 15185.0344 | 16.8596456 | 13676756.6 | cg27211696 | 0.01042467 | 66.7259119 | 2.68142897 | 1660.43828 |
| cg03595406 | 0.00554437 | 7.52E-09   | 1.37E-14   | 0.00413997 | cg03774463 | 0.0104276  | 13.6344037 | 1.84668657 | 100.665141 |
| cg16101148 | 0.00555304 | 29.7288512 | 2.70369445 | 326.887751 | cg06888121 | 0.01042965 | 8.60558725 | 1.65749196 | 44.6796325 |
| cg03195164 | 0.00555361 | 533.833213 | 6.30510531 | 45197.9603 | cg01656048 | 0.01043079 | 15232.1813 | 9.59198315 | 24188881.8 |
| cg11597832 | 0.00555428 | 18.4369467 | 2.35014802 | 144.638126 | cg01840244 | 0.01043326 | 38342.4823 | 11.9099934 | 123438015  |
| cg00350296 | 0.00556443 | 12.686897  | 2.10538987 | 76.4501425 | cg08464513 | 0.01043455 | 16.0535409 | 1.91850995 | 134.331426 |
| cg13523649 | 0.00556992 | 11.6640067 | 2.05374639 | 66.2443288 | cg09624525 | 0.01044511 | 473328.152 | 21.4507433 | 1.0444E+10 |

|            |            |            |            |            |            |            |            |            |            |
|------------|------------|------------|------------|------------|------------|------------|------------|------------|------------|
| cg12110327 | 0.00557631 | 20.8179408 | 2.43292019 | 178.134351 | cg21483820 | 0.01045516 | 140618.27  | 16.1161432 | 1226937347 |
| cg13722539 | 0.00557632 | 10150.3172 | 14.9062413 | 6911798.75 | cg09001028 | 0.01045705 | 3523.4878  | 6.78780998 | 1829009.11 |
| cg05060704 | 0.00557752 | 9.67998439 | 1.94407516 | 48.1988041 | cg14671364 | 0.01047017 | 78.9821701 | 2.78422595 | 2240.54488 |
| cg12439852 | 0.00558359 | 7.99613682 | 1.83791987 | 34.7883524 | cg06644428 | 0.01047438 | 7.17057379 | 1.58661526 | 32.4068032 |
| cg00620542 | 0.00558956 | 27501.8544 | 19.9191255 | 37971144.6 | cg12489322 | 0.01047875 | 3.2867E+15 | 4316.99212 | 2.50E+27   |
| cg14181387 | 0.00559017 | 12739.5707 | 15.900854  | 10206789   | cg01184591 | 0.01048116 | 0.02779635 | 0.00178843 | 0.43201921 |
| cg14591123 | 0.00559329 | 44.4676684 | 3.03558622 | 651.397586 | cg04608326 | 0.01048266 | 13406.8378 | 9.2633429  | 19403718.8 |
| cg16492833 | 0.00559702 | 183.162782 | 4.59213624 | 7305.66406 | cg01763719 | 0.01048634 | 0.10235508 | 0.01786695 | 0.5863654  |
| cg19971773 | 0.00560322 | 1482.22943 | 8.46038125 | 259681.45  | cg22693994 | 0.01049275 | 263.798268 | 3.68897963 | 18864.1666 |
| cg01366985 | 0.00561109 | 8.00969229 | 1.8372689  | 34.9187702 | cg19764541 | 0.01049776 | 179108433  | 85.4948022 | 3.7523E+14 |
| cg18426551 | 0.00561279 | 0.11207412 | 0.02381577 | 0.52740722 | cg24413235 | 0.01049806 | 3828.36495 | 6.89799317 | 2124730.75 |
| cg10449409 | 0.00562268 | 48.629965  | 3.11084083 | 760.203954 | cg06791405 | 0.0105079  | 162.486166 | 3.2907829  | 8022.94008 |
| cg00931235 | 0.0056232  | 6.0248E+12 | 5419.15276 | 6.70E+21   | cg07065570 | 0.01051199 | 203223.708 | 17.4491519 | 2366870071 |
| cg17604407 | 0.00562406 | 139867798  | 239.795402 | 8.1582E+13 | cg00334257 | 0.01051413 | 7979968841 | 207.164133 | 3.0739E+17 |
| cg14125530 | 0.00562599 | 15.8248173 | 2.24059137 | 111.767298 | cg22818988 | 0.01051839 | 546070571  | 110.530594 | 2.6978E+15 |
| cg00202760 | 0.00562916 | 32.0822567 | 2.75393939 | 373.745044 | cg17265380 | 0.0105187  | 9.11022809 | 1.67653798 | 49.5045485 |
| cg00351047 | 0.00563239 | 26.2903151 | 2.59794772 | 266.048721 | cg18365406 | 0.01053302 | 7.44685971 | 1.59886688 | 34.6843882 |
| cg01893681 | 0.0056376  | 1449.46418 | 8.37414327 | 250884.936 | cg17964980 | 0.0105392  | 14949.4346 | 9.45167325 | 23645082.7 |
| cg27410337 | 0.0056378  | 14.1922314 | 2.16943755 | 92.8440792 | cg08724866 | 0.01054108 | 84401.5065 | 14.1604616 | 503063706  |
| cg03408033 | 0.00564045 | 31306.143  | 20.5279944 | 47743319.3 | cg09577511 | 0.01054337 | 8.8030601  | 1.66226068 | 46.6195633 |
| cg08247347 | 0.00564309 | 82151886.2 | 204.218174 | 3.3048E+13 | cg25464815 | 0.01055159 | 163634667  | 82.8663554 | 3.2313E+14 |
| cg20801130 | 0.00564501 | 74.4702412 | 3.51832157 | 1576.26775 | cg21305265 | 0.01056163 | 69.506276  | 2.69171006 | 1794.8153  |
| cg07036112 | 0.00564571 | 20.9272992 | 2.42904064 | 180.298281 | cg06958211 | 0.01056939 | 106.35422  | 2.9716597  | 3806.36456 |
| cg11706780 | 0.00565539 | 13.5444338 | 2.13859924 | 85.7812357 | cg17324226 | 0.01058212 | 28488.0922 | 10.9410553 | 74176702.1 |
| cg13078331 | 0.00565605 | 8395416076 | 784.69415  | 8.9822E+16 | cg07235053 | 0.01058337 | 0.09538974 | 0.0157407  | 0.57806849 |
| cg07475692 | 0.00565625 | 3041.62887 | 10.3743675 | 891765.809 | cg06759097 | 0.01058352 | 60.319795  | 2.60178339 | 1398.45526 |
| cg00522384 | 0.00565855 | 95986.1633 | 28.3828031 | 324610065  | cg09369294 | 0.01058449 | 1.4315E+10 | 233.679198 | 8.7691E+17 |
| cg13315345 | 0.00566162 | 100.55903  | 3.83630395 | 2635.90127 | cg26465611 | 0.01058641 | 19.8689538 | 2.00792287 | 196.60881  |
| cg23489936 | 0.00566493 | 830731406  | 398.575086 | 1.7315E+15 | cg01208563 | 0.01059213 | 7.0266E+10 | 338.029447 | 1.4606E+19 |
| cg15777760 | 0.00567005 | 316.665991 | 5.35640709 | 18721.0098 | cg01554060 | 0.01059784 | 7.0273314  | 1.57537638 | 31.3470402 |

|            |            |            |            |            |            |            |            |            |            |
|------------|------------|------------|------------|------------|------------|------------|------------|------------|------------|
| cg27217148 | 0.00567007 | 34.1160284 | 2.79785463 | 415.998524 | cg24080793 | 0.01059841 | 5.51600116 | 1.48890237 | 20.4353686 |
| cg27635271 | 0.00567079 | 16.9927544 | 2.28340553 | 126.457478 | cg05845178 | 0.01060184 | 11.8786145 | 1.78025542 | 79.2591231 |
| cg12210363 | 0.00567982 | 53705753.3 | 178.660568 | 1.6144E+13 | cg15773138 | 0.0106174  | 220.346114 | 3.51333508 | 13819.4647 |
| cg13610108 | 0.00568022 | 357725794  | 310.385966 | 4.1229E+14 | cg07294234 | 0.01062028 | 6982.20643 | 7.85549807 | 6205998.17 |
| cg00295485 | 0.00568815 | 9.37921027 | 1.91914348 | 45.8379408 | cg11349878 | 0.01062152 | 0.0007661  | 3.12E-06   | 0.18813212 |
| cg11154838 | 0.00568859 | 20798.519  | 18.0900317 | 23912528.1 | cg00937681 | 0.0106304  | 190.944911 | 3.39579657 | 10736.7912 |
| cg00530939 | 0.00568999 | 4194356.23 | 84.8060373 | 2.0745E+11 | cg20976433 | 0.0106341  | 1.2587E+13 | 1119.10991 | 1.42E+23   |
| cg23464435 | 0.00569257 | 3937134.3  | 83.2095989 | 1.8629E+11 | cg11753867 | 0.01063958 | 3088.66398 | 6.48666537 | 1470685.57 |
| cg02068689 | 0.00569838 | 128.425307 | 4.10912649 | 4013.76293 | cg09146903 | 0.01064146 | 19.3519346 | 1.99241276 | 187.961741 |
| cg19481816 | 0.00569906 | 540.221319 | 6.24197705 | 46754.269  | cg06997416 | 0.0106415  | 1.9407E+13 | 1235.02357 | 3.05E+23   |
| cg19663209 | 0.00569915 | 27096.7936 | 19.5077478 | 37638185   | cg12253571 | 0.01064512 | 17163.1103 | 9.66276974 | 30485291.7 |
| cg14896306 | 0.00570155 | 217073918  | 266.739837 | 1.7666E+14 | cg09168548 | 0.01064777 | 1233104.92 | 26.1096676 | 5.8237E+10 |
| cg25076459 | 0.00570183 | 8.08533368 | 1.83717706 | 35.5831901 | cg10391522 | 0.01064814 | 18.0327516 | 1.95957828 | 165.943935 |
| cg10983208 | 0.00570433 | 13.1685822 | 2.11718231 | 81.9067673 | cg24247086 | 0.01065636 | 144541.22  | 15.8419364 | 1318788539 |
| cg03602233 | 0.00571292 | 14.5163321 | 2.17733596 | 96.7806081 | cg11044163 | 0.01065976 | 13.3636943 | 1.82710875 | 97.7436764 |
| cg25365404 | 0.00571824 | 36671.208  | 21.24101   | 63310430.8 | cg17719053 | 0.01066392 | 26.1906416 | 2.13621062 | 321.105841 |
| cg24516766 | 0.00572629 | 3.942E+11  | 2346.04527 | 6.6236E+19 | cg12891177 | 0.01067839 | 71.0328362 | 2.69217666 | 1874.19492 |
| cg16213375 | 0.0057317  | 151.990649 | 4.3050707  | 5366.03437 | cg10029130 | 0.01068014 | 992.835825 | 4.96751005 | 198434.017 |
| cg04793272 | 0.00573612 | 31.4522048 | 2.72321844 | 363.261783 | cg26031954 | 0.01068052 | 6.87915411 | 1.56511475 | 30.235969  |
| cg21291881 | 0.00573657 | 0.00039646 | 1.53E-06   | 0.10274614 | cg24462260 | 0.01068893 | 7084.06613 | 7.83506722 | 6405049.45 |
| cg11365324 | 0.00573847 | 2777236.91 | 74.4238365 | 1.0364E+11 | cg14344110 | 0.01068912 | 11649.9347 | 8.79427412 | 15432880.1 |
| cg25353054 | 0.00574225 | 2310485006 | 524.094797 | 1.0186E+16 | cg11399754 | 0.01069434 | 3.9228E+13 | 1431.32085 | 1.08E+24   |
| cg23378074 | 0.00575175 | 0.11209471 | 0.02371691 | 0.52980014 | cg18456691 | 0.01069617 | 1.9732E+10 | 245.373185 | 1.5868E+18 |
| cg01395659 | 0.00575736 | 877.449012 | 7.14697382 | 107726.261 | cg05497345 | 0.01070674 | 5.90297289 | 1.50976542 | 23.0798034 |
| cg23413007 | 0.00575898 | 69501.6572 | 25.4115776 | 190089747  | cg25562664 | 0.01070888 | 14.2954148 | 1.85358737 | 110.250473 |
| cg10932427 | 0.00575964 | 7439919.49 | 98.605054  | 5.6135E+11 | cg04377145 | 0.01071056 | 13.6417525 | 1.83348958 | 101.499028 |
| cg03517466 | 0.00576212 | 27.4908276 | 2.61548374 | 288.950602 | cg18352648 | 0.01071467 | 0.09393324 | 0.01527189 | 0.57775776 |
| cg02425595 | 0.00576405 | 255.219322 | 4.99173013 | 13048.9632 | cg24372325 | 0.01071515 | 75667813.9 | 67.2161684 | 8.5182E+13 |
| cg08446255 | 0.00576427 | 564.65777  | 6.28478098 | 50731.8231 | cg21370255 | 0.01072892 | 6.59440412 | 1.54843614 | 28.0839258 |
| cg22742344 | 0.00576659 | 97.8600549 | 3.77924976 | 2533.99245 | cg22652406 | 0.01073261 | 206.422017 | 3.43954377 | 12388.2851 |

|            |            |            |            |            |            |            |            |            |            |
|------------|------------|------------|------------|------------|------------|------------|------------|------------|------------|
| cg24341129 | 0.00577106 | 16.5369771 | 2.25606922 | 121.215967 | cg00393798 | 0.01073343 | 9.4293955  | 1.68210231 | 52.8585561 |
| cg27626318 | 0.00577722 | 162387.646 | 32.4036786 | 813788700  | cg17867333 | 0.01073755 | 0.13765774 | 0.03000291 | 0.63159374 |
| cg00224508 | 0.00577789 | 28829424.5 | 145.41601  | 5.7156E+12 | cg11206041 | 0.01074718 | 8.12652989 | 1.62466171 | 40.6487624 |
| cg17095910 | 0.0057844  | 875.945342 | 7.12439393 | 107697.616 | cg16907298 | 0.01076514 | 1.4457E+10 | 224.706718 | 9.3013E+17 |
| cg18298494 | 0.00578896 | 17.5109311 | 2.29211462 | 133.777214 | cg06537680 | 0.0107753  | 3.324E+11  | 463.042556 | 2.39E+20   |
| cg02767841 | 0.00579362 | 1607.14589 | 8.48603763 | 304372.669 | cg06508783 | 0.01078344 | 10.9651596 | 1.73993285 | 69.1030835 |
| cg05896563 | 0.00580016 | 2.6187E+14 | 14967.5451 | 4.58E+24   | cg26329020 | 0.0107861  | 3618.53205 | 6.65147355 | 1968552.39 |
| cg01409498 | 0.00580033 | 11.2489929 | 2.01546887 | 62.7843196 | cg23295999 | 0.01078772 | 432352.814 | 20.100643  | 9299650535 |
| cg02776641 | 0.00580056 | 351435.549 | 40.3570047 | 3060359560 | cg08756712 | 0.01078909 | 36.7788058 | 2.3014525  | 587.750803 |
| cg01966160 | 0.00580497 | 11.1199935 | 2.00842275 | 61.5678426 | cg23652354 | 0.01079138 | 5077113.61 | 35.5093267 | 7.2592E+11 |
| cg11298343 | 0.00581783 | 16.3506013 | 2.24440415 | 119.114983 | cg17489534 | 0.01079386 | 1540308.99 | 26.9419608 | 8.8062E+10 |
| cg09158821 | 0.00581941 | 0.00834326 | 0.00027799 | 0.25040681 | cg18235734 | 0.01081197 | 12.2161724 | 1.78271559 | 83.712101  |
| cg07273992 | 0.00581978 | 31.5883414 | 2.71520393 | 367.494796 | cg05094271 | 0.01081344 | 266846.217 | 17.9220965 | 3973134713 |
| cg19252931 | 0.00582231 | 0.149085   | 0.03854405 | 0.57664767 | cg06887897 | 0.01082514 | 0.12844602 | 0.02649797 | 0.62262803 |
| cg25994725 | 0.00582715 | 38.0794458 | 2.86493004 | 506.135985 | cg09135551 | 0.01082599 | 8.61673604 | 1.6441319  | 45.1594791 |
| cg03969696 | 0.00584377 | 8.23925065 | 1.83925579 | 36.9090867 | cg11323506 | 0.0108282  | 9.70680796 | 1.68989161 | 55.7563102 |
| cg15617292 | 0.00584614 | 6544194.47 | 93.1497444 | 4.5976E+11 | cg02205746 | 0.01082839 | 5.08017174 | 1.45527539 | 17.7342001 |
| cg11670109 | 0.005847   | 325.438965 | 5.31925964 | 19910.7633 | cg13560901 | 0.01083332 | 26.2423659 | 2.12566607 | 323.974577 |
| cg01819502 | 0.00585097 | 19.7412773 | 2.36678678 | 164.661232 | cg00108715 | 0.01083701 | 201.312855 | 3.40120942 | 11915.4279 |
| cg05460949 | 0.00585294 | 93366.654  | 27.2558836 | 319833039  | cg03058232 | 0.01085831 | 14.2424615 | 1.84483939 | 109.954129 |
| cg15238694 | 0.00585324 | 0.06955796 | 0.01044804 | 0.46308304 | cg01876338 | 0.01086133 | 9.53319932 | 1.6816452  | 54.0434386 |
| cg03811891 | 0.00585327 | 7.72935842 | 1.80511076 | 33.0965738 | cg06784539 | 0.01086357 | 22.8043264 | 2.0559901  | 252.93765  |
| cg06363275 | 0.00585563 | 490227.172 | 43.978953  | 5464492994 | cg20801007 | 0.01086671 | 3.86269752 | 1.36539897 | 10.9275256 |
| cg00256060 | 0.00586825 | 120.886109 | 3.98987862 | 3662.63056 | cg13051028 | 0.01086864 | 149778.101 | 15.5839944 | 1439520499 |
| cg09527362 | 0.0058706  | 129.798975 | 4.07196722 | 4137.50233 | cg06382770 | 0.01088961 | 103.605676 | 2.91094573 | 3687.50818 |
| cg21644628 | 0.00587075 | 0.00130227 | 1.15E-05   | 0.14703702 | cg11521427 | 0.01089421 | 13.6606725 | 1.82552327 | 102.224921 |
| cg00500299 | 0.00587281 | 5090267.95 | 86.1151423 | 3.0089E+11 | cg15982308 | 0.01090057 | 367.354865 | 3.89339625 | 34661.1513 |
| cg07343367 | 0.00587446 | 216971.048 | 34.6395612 | 1359036717 | cg01910527 | 0.01090103 | 0.13243281 | 0.02792872 | 0.62797172 |
| cg19160353 | 0.00587616 | 980723.481 | 53.5103598 | 1.7974E+10 | cg02512505 | 0.01090127 | 6.89723907 | 1.55957756 | 30.5030722 |
| cg03611151 | 0.00588221 | 11.3150586 | 2.0131056  | 63.5985275 | cg13183282 | 0.01090163 | 4430221.94 | 33.8484702 | 5.7985E+11 |



|            |            |            |            |            |            |            |            |            |            |
|------------|------------|------------|------------|------------|------------|------------|------------|------------|------------|
| cg15821095 | 0.00588475 | 20.2985164 | 2.38240146 | 172.947244 | cg25463478 | 0.01090301 | 4072145.12 | 33.1915583 | 4.996E+11  |
| cg00257202 | 0.00588604 | 338595.841 | 39.3019023 | 2917088916 | cg07195301 | 0.01091282 | 16.8102778 | 1.9138518  | 147.652729 |
| cg26532627 | 0.00589486 | 10.3024935 | 1.95857789 | 54.1930824 | cg13955572 | 0.0109152  | 944.235682 | 4.83351798 | 184457.992 |
| cg01270593 | 0.00589547 | 13.7102698 | 2.12666346 | 88.3879853 | cg24550525 | 0.01092794 | 19.0835795 | 1.96966185 | 184.896208 |
| cg11216502 | 0.00590092 | 6206.25426 | 12.3823769 | 3110678.35 | cg19585103 | 0.01093985 | 5.76751421 | 1.49570062 | 22.2398919 |
| cg14666655 | 0.00590131 | 20346.5432 | 17.4322755 | 23748008.1 | cg13175159 | 0.01094262 | 29.83331   | 2.18166392 | 407.957605 |
| cg24448326 | 0.00590228 | 62833.904  | 24.1201364 | 163684792  | cg27369431 | 0.01094301 | 25.50957   | 2.10455828 | 309.204154 |
| cg09942293 | 0.00590578 | 38.3559455 | 2.85909956 | 514.560101 | cg10779981 | 0.01094322 | 268975299  | 86.4043233 | 8.3732E+14 |
| cg22448601 | 0.00590597 | 24603119.3 | 134.581087 | 4.4978E+12 | cg10507121 | 0.01094427 | 65434170.3 | 62.4344942 | 6.8578E+13 |
| cg11276456 | 0.00590675 | 4.6886E+11 | 2299.99578 | 9.5577E+19 | cg19822127 | 0.01094897 | 26293606.9 | 50.5976403 | 1.3664E+13 |
| cg07869830 | 0.00590795 | 33.4466561 | 2.74820104 | 407.058577 | cg00202760 | 0.01095325 | 49.2186555 | 2.44660901 | 990.136158 |
| cg14836450 | 0.00591331 | 12.3955721 | 2.06443839 | 74.4271215 | cg13861524 | 0.01096211 | 377.825041 | 3.90484646 | 36557.5864 |
| cg24258806 | 0.00591421 | 27263386.9 | 138.340821 | 5.3729E+12 | cg08593883 | 0.01096592 | 0.11059003 | 0.02027248 | 0.60328844 |
| cg06377221 | 0.00591713 | 12561209.2 | 110.598726 | 1.4266E+12 | cg16164732 | 0.0109693  | 491.89005  | 4.14684589 | 58346.9527 |
| cg12881470 | 0.00591878 | 201.171037 | 4.60386312 | 8790.39736 | cg05212510 | 0.01097201 | 0.0169503  | 0.00073227 | 0.39236095 |
| cg25412979 | 0.00593005 | 33.1503931 | 2.73813314 | 401.349571 | cg20556988 | 0.0109817  | 0.13691603 | 0.02957794 | 0.63378311 |
| cg04567169 | 0.00593015 | 5.8919E+10 | 1255.03814 | 2.766E+18  | cg23584743 | 0.01098502 | 5.33808088 | 1.46827322 | 19.4072241 |
| cg04228628 | 0.00593909 | 24210.9751 | 18.2281679 | 32157445.6 | cg22093805 | 0.01098649 | 274.252922 | 3.62319781 | 20759.1938 |
| cg13062913 | 0.00593983 | 30.7347784 | 2.67789219 | 352.750051 | cg10672880 | 0.0109921  | 166072.312 | 15.7319742 | 1753118366 |
| cg03236948 | 0.00594224 | 32.5089864 | 2.72113388 | 388.380082 | cg00092273 | 0.01099816 | 130173229  | 72.414749  | 2.34E+14   |
| cg04821708 | 0.00594919 | 12.1668457 | 2.05076646 | 72.1838088 | cg27572598 | 0.01100846 | 1526491694 | 127.047926 | 1.8341E+16 |
| cg16856981 | 0.00595022 | 1421619393 | 427.247641 | 4.7303E+15 | cg24105407 | 0.01101022 | 19.4311641 | 1.97319923 | 191.349224 |
| cg25864218 | 0.00596125 | 589161.483 | 45.4532023 | 7636673228 | cg24005667 | 0.01101165 | 0.11405885 | 0.0213914  | 0.60816144 |
| cg06150468 | 0.00596674 | 21.4934302 | 2.41332453 | 191.423714 | cg26354439 | 0.01101326 | 0.00500992 | 8.44E-05   | 0.29726348 |
| cg10296301 | 0.005968   | 0.0747729  | 0.01177362 | 0.47487422 | cg07390023 | 0.01101781 | 67.5843618 | 2.62451948 | 1740.37419 |
| cg24371438 | 0.00597436 | 11248577.6 | 105.728169 | 1.1968E+12 | cg14182841 | 0.0110222  | 305.11909  | 3.70560361 | 25123.4803 |
| cg11165313 | 0.00597459 | 55257.9293 | 22.9829373 | 132856767  | cg06945667 | 0.01102307 | 1929615.8  | 27.4856663 | 1.3547E+11 |
| cg09368716 | 0.00597739 | 23.673447  | 2.48002694 | 225.978228 | cg10059484 | 0.0110258  | 126.126687 | 3.02649928 | 5256.21837 |
| cg19902519 | 0.00597992 | 179069.816 | 32.1805958 | 996438947  | cg21347053 | 0.01102616 | 4.90863875 | 1.43939597 | 16.7394761 |
| cg05552569 | 0.00598206 | 62.4931568 | 3.27598067 | 1192.12994 | cg14386850 | 0.01103238 | 6402698.54 | 36.1209781 | 1.1349E+12 |

|            |            |            |            |            |            |            |            |            |            |
|------------|------------|------------|------------|------------|------------|------------|------------|------------|------------|
| cg08504583 | 0.00598262 | 0.01036217 | 0.00039846 | 0.26947552 | cg18923197 | 0.01103276 | 689511641  | 105.397017 | 4.5108E+15 |
| cg21682062 | 0.00599018 | 1.0274E+14 | 10453.5772 | 1.01E+24   | cg18127922 | 0.01104076 | 71.9138464 | 2.65959571 | 1944.50657 |
| cg16854917 | 0.00599286 | 6.23032178 | 1.68995409 | 22.9692095 | cg20690916 | 0.01104922 | 538.623982 | 4.21368581 | 68850.8368 |
| cg11819639 | 0.00599591 | 568.254287 | 6.16475424 | 52380.5042 | cg24165760 | 0.01105107 | 83.9115575 | 2.75394966 | 2556.74589 |
| cg14188862 | 0.00600154 | 92.7480734 | 3.66440639 | 2347.50304 | cg11229862 | 0.0110553  | 8.43619081 | 1.6284014  | 43.7050197 |
| cg03142071 | 0.00600292 | 0.04017534 | 0.00405621 | 0.39792261 | cg01553230 | 0.01107016 | 1.52E-05   | 2.92E-09   | 0.07927181 |
| cg08641278 | 0.00600358 | 11.5815036 | 2.01808034 | 66.4647601 | cg16593556 | 0.0110786  | 1898.73716 | 5.60894748 | 642759.237 |
| cg03355690 | 0.00600362 | 9.7133436  | 1.91883755 | 49.1698966 | cg08272286 | 0.0110788  | 28.2381154 | 2.14488181 | 371.764615 |
| cg07099000 | 0.00600397 | 7.01640559 | 1.74800297 | 28.1635376 | cg27201457 | 0.01108197 | 0.08288648 | 0.01213325 | 0.5662266  |
| cg04590284 | 0.0060041  | 3613152.7  | 75.8284601 | 1.7216E+11 | cg27303409 | 0.01108584 | 5823.70229 | 7.24105339 | 4683781.01 |
| cg27663476 | 0.00601339 | 16.6558349 | 2.23874134 | 123.916431 | cg16257334 | 0.01108642 | 837275.998 | 22.5155827 | 3.1135E+10 |
| cg01126162 | 0.00602299 | 17.3427398 | 2.26393637 | 132.852949 | cg16501237 | 0.01108758 | 9.19696966 | 1.65972828 | 50.9627099 |
| cg04562522 | 0.00603268 | 78723879.2 | 182.071287 | 3.4039E+13 | cg11537619 | 0.01109654 | 39.937585  | 2.32016689 | 687.45516  |
| cg16002441 | 0.00603975 | 93.0846495 | 3.65923065 | 2367.91632 | cg08701937 | 0.01110796 | 1475.43814 | 5.28405363 | 411978.732 |
| cg11505048 | 0.00604012 | 24.6500364 | 2.50183215 | 242.871727 | cg03196220 | 0.0111096  | 156.441768 | 3.16659093 | 7728.82492 |
| cg07311956 | 0.00604128 | 8.78060619 | 1.86194559 | 41.4077864 | cg26280499 | 0.01111048 | 0.02476571 | 0.00142592 | 0.43013711 |
| cg15390960 | 0.00605238 | 2006060.89 | 63.4275753 | 6.3447E+10 | cg14123048 | 0.01111525 | 1971.56879 | 5.64233202 | 688914.351 |
| cg04757806 | 0.00605554 | 0.06820389 | 0.01002447 | 0.46404175 | cg14558114 | 0.01111898 | 14.2014982 | 1.83136745 | 110.126754 |
| cg04774040 | 0.00606359 | 91.5133946 | 3.63592313 | 2303.32191 | cg14212180 | 0.01112121 | 4614.93326 | 6.84682643 | 3110581.12 |
| cg23008047 | 0.00606479 | 2472.65753 | 9.32711825 | 655511.715 | cg02862025 | 0.01112492 | 45264.7352 | 11.5192431 | 177867264  |
| cg14425609 | 0.00607425 | 2.1579E+17 | 89467.144  | 5.20E+29   | cg17937683 | 0.01112893 | 195573.661 | 16.0736417 | 2379613619 |
| cg21504505 | 0.00608672 | 0.08988885 | 0.01607363 | 0.50268705 | cg14334286 | 0.01112988 | 8.22152626 | 1.61639769 | 41.817366  |
| cg11247103 | 0.00608715 | 10776.634  | 14.1642253 | 8199236.94 | cg08090734 | 0.01114734 | 2.9661E+11 | 410.183442 | 2.14E+20   |
| cg03308839 | 0.00608933 | 0.00658187 | 0.00018174 | 0.23836874 | cg18224445 | 0.01114768 | 38592.5641 | 11.0824848 | 134390981  |
| cg02319613 | 0.00609024 | 2319049.06 | 65.5981891 | 8.1984E+10 | cg25365260 | 0.01115035 | 9.72543358 | 1.67874265 | 56.3422025 |
| cg11007153 | 0.00609144 | 0.14322912 | 0.035723   | 0.57426813 | cg14287235 | 0.01115103 | 5.00842943 | 1.44325785 | 17.3803768 |
| cg10522845 | 0.00609458 | 9.6265084  | 1.90834977 | 48.5601043 | cg26056577 | 0.01115132 | 98.0453165 | 2.84121865 | 3383.36653 |
| cg16788391 | 0.00609648 | 9253.96427 | 13.5452537 | 6322203.84 | cg23354735 | 0.01116198 | 137.818881 | 3.06876661 | 6189.47164 |
| cg25983070 | 0.00609832 | 190097.69  | 32.0785029 | 1126521769 | cg00630080 | 0.01116396 | 16885503.7 | 44.1609445 | 6.4564E+12 |
| cg04832210 | 0.00609856 | 15214.9645 | 15.605743  | 14833971.4 | cg07141055 | 0.01118329 | 36.8558706 | 2.27122619 | 598.071299 |

|            |            |            |            |            |            |            |            |            |            |
|------------|------------|------------|------------|------------|------------|------------|------------|------------|------------|
| cg22038796 | 0.00610186 | 58.0076978 | 3.18475141 | 1056.56378 | cg24323726 | 0.01118659 | 46.9360326 | 2.39931435 | 918.175294 |
| cg03977294 | 0.00610195 | 35822.4837 | 19.914695  | 64437358.2 | cg22077262 | 0.01118773 | 15217.1245 | 8.93271462 | 25922789.1 |
| cg14967868 | 0.00610271 | 460926.241 | 41.2682373 | 5148099698 | cg01268763 | 0.01119551 | 57.7684259 | 2.51445929 | 1327.20027 |
| cg25598759 | 0.00610615 | 5897496.92 | 85.3264016 | 4.0762E+11 | cg01805469 | 0.01120024 | 1135312.72 | 23.7737314 | 5.4217E+10 |
| cg08575233 | 0.00610791 | 91.3683398 | 3.62406875 | 2303.53619 | cg22198615 | 0.01120488 | 19331.6127 | 9.41707418 | 39684433   |
| cg23213696 | 0.00611135 | 594744487  | 317.625842 | 1.1136E+15 | cg05531055 | 0.01120777 | 2.1724E+12 | 635.084604 | 7.43E+21   |
| cg12457909 | 0.00611245 | 7.43783521 | 1.77203026 | 31.2192144 | cg06602723 | 0.01121178 | 10.6082021 | 1.70992323 | 65.8122825 |
| cg20601919 | 0.00611375 | 5.93600102 | 1.66160714 | 21.2060404 | cg04882359 | 0.01121328 | 75298.5198 | 12.8145146 | 442456640  |
| cg06705004 | 0.00611904 | 0.0140902  | 0.00066904 | 0.29674337 | cg15235373 | 0.01122936 | 354883.276 | 18.1880109 | 6924459187 |
| cg22586726 | 0.00611941 | 5.43637317 | 1.62025468 | 18.2404369 | cg19127747 | 0.01123257 | 57.4343428 | 2.50756107 | 1315.50285 |
| cg23192824 | 0.00612011 | 725.580075 | 6.53650393 | 80542.5117 | cg23820828 | 0.01123502 | 34.0357078 | 2.22660606 | 520.26689  |
| cg02382426 | 0.00612051 | 8.27959648 | 1.82660074 | 37.5296671 | cg06635722 | 0.01124508 | 13.0576827 | 1.79109221 | 95.1950308 |
| cg27241190 | 0.00612394 | 76521.9174 | 24.6435328 | 237612191  | cg16749930 | 0.0112453  | 32.7934366 | 2.20714492 | 487.240089 |
| cg19488206 | 0.00612492 | 45.4406755 | 2.96680696 | 695.985622 | cg22928599 | 0.01124819 | 78.2088143 | 2.6878279  | 2275.67346 |
| cg17265380 | 0.00612618 | 8.03023466 | 1.81045004 | 35.6180327 | cg26985469 | 0.01125366 | 28226.621  | 10.214195  | 78003418.8 |
| cg11701250 | 0.00612993 | 13364.6484 | 14.9762607 | 11926463.6 | cg04252889 | 0.01125678 | 0.05999731 | 0.00681225 | 0.52841216 |
| cg07232612 | 0.00613515 | 8.70335614 | 1.85195147 | 40.9019401 | cg03693099 | 0.01125835 | 800.839235 | 4.55261346 | 140873.695 |
| cg21823502 | 0.00614265 | 0.15802676 | 0.04222645 | 0.59139363 | cg07951810 | 0.0112595  | 143104503  | 70.6111476 | 2.9002E+14 |
| cg04286878 | 0.00614446 | 3.02E-06   | 3.40E-10   | 0.02682298 | cg19007249 | 0.01125964 | 12.6340065 | 1.77711774 | 89.8185403 |
| cg12110584 | 0.00615495 | 133940562  | 205.28428  | 8.7391E+13 | cg11528307 | 0.01127852 | 6701.69113 | 7.35697837 | 6104770.43 |
| cg24602417 | 0.00616899 | 15.2405038 | 2.16954197 | 107.060826 | cg12451530 | 0.01128555 | 8.25350777 | 1.61277578 | 42.2379796 |
| cg20393324 | 0.0061704  | 5.81230672 | 1.64936233 | 20.4824064 | cg00393376 | 0.01130133 | 0.00081384 | 3.31E-06   | 0.19991714 |
| cg13752005 | 0.00618211 | 13196.2114 | 14.8195677 | 11750679.9 | cg01659099 | 0.01131715 | 6.12106221 | 1.5064072  | 24.8720283 |
| cg22934035 | 0.00618247 | 19.1420945 | 2.3135242  | 158.381651 | cg00891278 | 0.01131936 | 13.4515539 | 1.79990883 | 100.529704 |
| cg00721125 | 0.00618744 | 1.8219E+11 | 1580.76681 | 2.0997E+19 | cg27274446 | 0.01132563 | 33.3927576 | 2.21031777 | 504.486857 |
| cg13099644 | 0.00619046 | 54362.1443 | 22.1307604 | 133535526  | cg11815708 | 0.01133049 | 28.2606469 | 2.1281608  | 375.283749 |
| cg04377288 | 0.00619104 | 8.4396719  | 1.83274746 | 38.8640898 | cg03811891 | 0.01133617 | 9.07242825 | 1.64595801 | 50.0067156 |
| cg10191684 | 0.00619152 | 414.874668 | 5.54044853 | 31066.2556 | cg04672495 | 0.01133704 | 19.3170474 | 1.9524327  | 191.119685 |
| cg26151000 | 0.00619262 | 133.30804  | 4.01303106 | 4428.33189 | cg11079583 | 0.01133868 | 20.4097376 | 1.97676706 | 210.726594 |
| cg26794902 | 0.00621778 | 4.0507E+11 | 1961.3665  | 8.3655E+19 | cg06834434 | 0.01134035 | 21979.5308 | 9.57201272 | 50470030.7 |

|            |            |            |            |            |            |            |            |            |            |
|------------|------------|------------|------------|------------|------------|------------|------------|------------|------------|
| cg24886176 | 0.00621803 | 6245.35922 | 11.9295488 | 3269571.43 | cg03747003 | 0.01134249 | 204.546072 | 3.32687207 | 12576.1059 |
| cg00611674 | 0.00621834 | 0.00450785 | 9.41E-05   | 0.21604776 | cg08327378 | 0.01134725 | 1040.38474 | 4.80269865 | 225373.376 |
| cg08970083 | 0.0062198  | 34.5326822 | 2.73078216 | 436.690322 | cg00204465 | 0.01134761 | 9.05616898 | 1.64489906 | 49.8597139 |
| cg01678292 | 0.00622058 | 28.8733958 | 2.59551809 | 321.19714  | cg10439691 | 0.01135185 | 18282878.5 | 43.645832  | 7.6585E+12 |
| cg00122310 | 0.00622737 | 15641175.3 | 109.584939 | 2.2325E+12 | cg02219147 | 0.01135968 | 175767713  | 72.6598086 | 4.2519E+14 |
| cg14027234 | 0.00622787 | 17.1072188 | 2.23680373 | 130.83711  | cg17349406 | 0.0113598  | 35.7880347 | 2.24261368 | 571.111932 |
| cg15684116 | 0.00622808 | 3860748.62 | 73.6914668 | 2.0227E+11 | cg11669397 | 0.01136013 | 100436.778 | 13.4634187 | 749255934  |
| cg07270460 | 0.00623005 | 6.216E+15  | 30009.6986 | 1.29E+27   | cg15456476 | 0.01137121 | 157.763913 | 3.13300332 | 7944.27895 |
| cg00213177 | 0.00623066 | 16.9665213 | 2.23132889 | 129.009598 | cg27105630 | 0.01137421 | 182150.592 | 15.3751819 | 2157947684 |
| cg01306563 | 0.00623192 | 47.2372708 | 2.98260138 | 748.125368 | cg14323199 | 0.01138167 | 27.5566162 | 2.11267132 | 359.434566 |
| cg14200826 | 0.00623587 | 4.3901E+12 | 3827.90616 | 5.03E+21   | cg02129266 | 0.0113841  | 1210904.58 | 23.5428822 | 6.2282E+10 |
| cg26575389 | 0.00624173 | 10.567226  | 1.95035921 | 57.2542046 | cg24951781 | 0.01139376 | 38.2015056 | 2.27324274 | 641.970611 |
| cg04807004 | 0.00624212 | 57.7014239 | 3.15485973 | 1055.34147 | cg27028281 | 0.01140913 | 8.97319125 | 1.63939385 | 49.1145926 |
| cg12827530 | 0.00624404 | 6.82904935 | 1.72333282 | 27.0614675 | cg19592277 | 0.01141077 | 7.61186537 | 1.5796899  | 36.6783977 |
| cg05676593 | 0.00624816 | 40675.5342 | 20.2084662 | 81871581.4 | cg26298967 | 0.01142756 | 18.0099208 | 1.9170275  | 169.198015 |
| cg07365404 | 0.00624841 | 86186180.3 | 176.840449 | 4.2004E+13 | cg17895870 | 0.01143224 | 10997.8345 | 8.12009818 | 14895431.2 |
| cg23958684 | 0.0062509  | 37.5079071 | 2.7911947  | 504.029007 | cg09820519 | 0.01143485 | 24.4046735 | 2.05229156 | 290.206374 |
| cg20460554 | 0.00625173 | 44.3873036 | 2.92740841 | 673.02967  | cg14077270 | 0.01144487 | 5750689.92 | 33.1574157 | 9.9738E+11 |
| cg07105947 | 0.00625623 | 8.08693069 | 1.80724384 | 36.1868423 | cg12224388 | 0.01145194 | 0.13155768 | 0.02731029 | 0.6337326  |
| cg19961545 | 0.00625676 | 9.52969587 | 1.89319418 | 47.9692492 | cg11875676 | 0.01145768 | 1.0007E+11 | 297.276523 | 3.3683E+19 |
| cg17831137 | 0.0062591  | 7262488.43 | 87.5541674 | 6.0241E+11 | cg08700546 | 0.01146864 | 311.26343  | 3.63300419 | 26667.991  |
| cg07274204 | 0.0062608  | 40.2578114 | 2.84624942 | 569.412985 | cg20417500 | 0.01148402 | 23.4753794 | 2.03147659 | 271.277277 |
| cg11012835 | 0.00626327 | 1093306639 | 361.593568 | 3.3057E+15 | cg07142961 | 0.01148497 | 149120.464 | 14.5152746 | 1531966393 |
| cg20465207 | 0.00626694 | 14553.2831 | 15.0669672 | 14057112.3 | cg13338827 | 0.01149629 | 9.15174521 | 1.64370396 | 50.9546989 |
| cg09395021 | 0.00627613 | 3032.68419 | 9.65692541 | 952391.468 | cg09368716 | 0.01149648 | 26.0261262 | 2.07829349 | 325.920882 |
| cg19872463 | 0.00627842 | 5.8082196  | 1.64469911 | 20.5116029 | cg12007596 | 0.01150116 | 8.57472729 | 1.61969163 | 45.3950287 |
| cg16000360 | 0.00628539 | 464.288378 | 5.67497996 | 37984.9267 | cg02519208 | 0.01150534 | 14.4075033 | 1.81954967 | 114.081059 |
| cg16079865 | 0.00628889 | 0.00298738 | 4.62E-05   | 0.19334186 | cg04923496 | 0.01151201 | 2.3922E+11 | 356.828919 | 1.60E+20   |
| cg02986643 | 0.00629002 | 13.5370944 | 2.08851283 | 87.7432599 | cg02595219 | 0.01151414 | 12.175862  | 1.75176074 | 84.630059  |
| cg26328687 | 0.00629355 | 31.0916787 | 2.64142671 | 365.973617 | cg04529955 | 0.01151531 | 1339194025 | 111.43655  | 1.6094E+16 |

|            |            |            |            |            |            |            |            |            |            |
|------------|------------|------------|------------|------------|------------|------------|------------|------------|------------|
| cg24520975 | 0.00629405 | 12.6899419 | 2.05042035 | 78.5373724 | cg06364315 | 0.01151764 | 490.202493 | 4.01195521 | 59895.6047 |
| cg12033622 | 0.0062959  | 15.1934496 | 2.15730502 | 107.004299 | cg07869548 | 0.01151827 | 21.3418574 | 1.98651562 | 229.28331  |
| cg00624212 | 0.00629942 | 11107078.5 | 97.8587565 | 1.2607E+12 | cg24439070 | 0.01153423 | 200970.85  | 15.4341201 | 2616882737 |
| cg11270393 | 0.00630173 | 5.45316908 | 1.6147405  | 18.4159951 | cg13099839 | 0.01153666 | 54.5325567 | 2.4499735  | 1213.80894 |
| cg23463742 | 0.00630483 | 3938361.28 | 72.9274054 | 2.1269E+11 | cg18404628 | 0.01154906 | 14551431.1 | 40.2050554 | 5.2666E+12 |
| cg12412075 | 0.00630511 | 429.065362 | 5.54068699 | 33226.4004 | cg18815943 | 0.01155308 | 6.37098162 | 1.51386936 | 26.8116972 |
| cg11188483 | 0.0063121  | 67.8908901 | 3.29021677 | 1400.87213 | cg08781140 | 0.01155729 | 3.74404719 | 1.34390175 | 10.4307397 |
| cg10718721 | 0.00631422 | 111655.589 | 26.6168527 | 468386350  | cg10896318 | 0.01155951 | 3188.38666 | 6.08632149 | 1670271.53 |
| cg15287024 | 0.00631445 | 3361.77149 | 9.90003294 | 1141562.62 | cg05129081 | 0.01156879 | 11.4620631 | 1.72603079 | 76.1161913 |
| cg05655806 | 0.00631675 | 9.16998709 | 1.86926136 | 44.9849684 | cg12195820 | 0.01158198 | 97286.2868 | 13.0510007 | 725202750  |
| cg11941520 | 0.00631991 | 173.050427 | 4.28275963 | 6992.32572 | cg25953133 | 0.01158527 | 2402.68467 | 5.70208404 | 1012418.2  |
| cg06389888 | 0.00632168 | 14.8162516 | 2.13999184 | 102.580443 | cg15851312 | 0.01158616 | 4.4146E+11 | 401.864607 | 4.85E+20   |
| cg10864791 | 0.00632417 | 3213178843 | 481.697185 | 2.1434E+16 | cg25886284 | 0.0115891  | 7.23470187 | 1.55655234 | 33.6261813 |
| cg07283778 | 0.00632968 | 5.3357E+11 | 2034.35614 | 1.40E+20   | cg14346035 | 0.01159024 | 116.608723 | 2.89795983 | 4692.12655 |
| cg16640096 | 0.00633005 | 1089.61982 | 7.19197585 | 165082.779 | cg09323092 | 0.01159429 | 0.05194148 | 0.00522605 | 0.51624439 |
| cg03407228 | 0.0063327  | 79.8840073 | 3.44060913 | 1854.74559 | cg01046287 | 0.01160831 | 1165.64976 | 4.84312206 | 280550.305 |
| cg09251959 | 0.0063339  | 21.7887314 | 2.3848389  | 199.069554 | cg09728506 | 0.01160989 | 121.820761 | 2.92385843 | 5075.58701 |
| cg12582022 | 0.00633786 | 4438350.93 | 74.9104811 | 2.6297E+11 | cg15837119 | 0.01161243 | 22700.4873 | 9.39827233 | 54830516.4 |
| cg26455579 | 0.00634095 | 13298508.2 | 102.009192 | 1.7337E+12 | cg17211192 | 0.01161798 | 8545.25578 | 7.55201033 | 9669133.53 |
| cg20972917 | 0.00634346 | 27.8279223 | 2.5541037  | 303.195699 | cg07381000 | 0.01161841 | 37.4958117 | 2.24650541 | 625.83241  |
| cg15366555 | 0.00634742 | 14.2683262 | 2.11537183 | 96.2408264 | cg02067983 | 0.01161922 | 16.5916916 | 1.8724972  | 147.014496 |
| cg27347140 | 0.00635167 | 354.797662 | 5.2314621  | 24062.3708 | cg04186360 | 0.01162362 | 10.8864733 | 1.70416258 | 69.5445979 |
| cg27377289 | 0.00635443 | 9.74800306 | 1.89956442 | 50.02387   | cg15718572 | 0.01162605 | 8.53947947 | 1.61415152 | 45.1771156 |
| cg00842549 | 0.00635884 | 10.1357479 | 1.92029016 | 53.4988871 | cg20091128 | 0.01162914 | 42746452.5 | 50.5123238 | 3.6175E+13 |
| cg07138512 | 0.00635945 | 31.1298196 | 2.63415348 | 367.885043 | cg21634218 | 0.0116316  | 7.20430877 | 1.55387207 | 33.4017619 |
| cg17198397 | 0.00636833 | 0.06599523 | 0.00936345 | 0.46514606 | cg10497871 | 0.01163828 | 10.6328462 | 1.69467013 | 66.7135246 |
| cg14172427 | 0.00636897 | 0.07670235 | 0.0121236  | 0.48527246 | cg13686362 | 0.01165533 | 50430.484  | 11.1842472 | 227394269  |
| cg10794285 | 0.00637129 | 4.79381312 | 1.5546904  | 14.7814923 | cg12184886 | 0.01165842 | 6.4717875  | 1.51641804 | 27.6203741 |
| cg08440349 | 0.00637156 | 446002.76  | 38.9524173 | 5106703923 | cg00155423 | 0.01165897 | 10.2532273 | 1.6802254  | 62.5681941 |
| cg02519806 | 0.0063741  | 9.75421766 | 1.89874429 | 50.1093079 | cg23858195 | 0.01167775 | 51309.2906 | 11.2020826 | 235013738  |

|            |            |            |            |            |            |            |            |            |            |
|------------|------------|------------|------------|------------|------------|------------|------------|------------|------------|
| cg25074426 | 0.00637535 | 6.91517537 | 1.72344656 | 27.7465235 | cg13709054 | 0.01167827 | 6398.6297  | 7.04482633 | 5811706.36 |
| cg12968732 | 0.00637855 | 0.16908293 | 0.04714652 | 0.60638706 | cg19389852 | 0.01168704 | 0.00211026 | 1.76E-05   | 0.25361107 |
| cg19426955 | 0.00638048 | 22.312085  | 2.39612222 | 207.764502 | cg22678932 | 0.01170366 | 83852.98   | 12.4634153 | 564156941  |
| cg02486590 | 0.00638561 | 2780400    | 65.0224454 | 1.1889E+11 | cg17493098 | 0.01170553 | 156.200079 | 3.07698078 | 7929.3523  |
| cg10119082 | 0.00638631 | 5.62221222 | 1.62547701 | 19.4461503 | cg04401436 | 0.01171716 | 2246036.78 | 25.8579674 | 1.9509E+11 |
| cg07294541 | 0.00639034 | 14.3995288 | 2.11752816 | 97.9190899 | cg21922731 | 0.01172481 | 136.24207  | 2.98217331 | 6224.28666 |
| cg13827970 | 0.00639683 | 26095.741  | 17.4556956 | 39012349.6 | cg02289168 | 0.01173103 | 10914991   | 36.6771896 | 3.2483E+12 |
| cg00321850 | 0.0063974  | 540.243019 | 5.86653389 | 49750.4191 | cg09078754 | 0.01173332 | 14.5191773 | 1.81237984 | 116.314751 |
| cg01959640 | 0.00640176 | 70.1748385 | 3.30385959 | 1490.53185 | cg14019186 | 0.01173627 | 5.33636786 | 1.45082571 | 19.6280102 |
| cg25851425 | 0.00640334 | 6853.79244 | 11.9762985 | 3922286.25 | cg14515252 | 0.01173649 | 53656.544  | 11.2473649 | 255973266  |
| cg20474425 | 0.00640709 | 7.06323576 | 1.73229146 | 28.7995989 | cg02683846 | 0.01174033 | 59.6566764 | 2.480485   | 1434.76741 |
| cg06288821 | 0.00641182 | 581.436846 | 5.98154877 | 56518.6073 | cg09886849 | 0.01174422 | 0.05524933 | 0.00580836 | 0.52553397 |
| cg16618637 | 0.00641382 | 0.00314041 | 4.98E-05   | 0.19803028 | cg13066963 | 0.0117497  | 23.3966214 | 2.01416802 | 271.775685 |
| cg16013543 | 0.00641527 | 14.072313  | 2.10199679 | 94.2104167 | cg00679711 | 0.01175191 | 0.03909357 | 0.00313966 | 0.48677517 |
| cg13996209 | 0.00641593 | 251.925068 | 4.72729939 | 13425.475  | cg14112754 | 0.01175287 | 12.1386199 | 1.74087504 | 84.6390981 |
| cg12434258 | 0.00641824 | 238389.305 | 32.3986052 | 1754071209 | cg24137660 | 0.01175569 | 0.07913931 | 0.01100009 | 0.56936196 |
| cg11060910 | 0.0064206  | 0.01450806 | 0.00069116 | 0.3045362  | cg03893150 | 0.01179201 | 11.6151808 | 1.72238882 | 78.3286702 |
| cg18044111 | 0.00643352 | 16.7444646 | 2.20567977 | 127.115957 | cg14523898 | 0.01179271 | 10.118104  | 1.67046768 | 61.285848  |
| cg24905333 | 0.00643501 | 6.44E-08   | 4.32E-13   | 0.00958394 | cg21082050 | 0.01179797 | 35.4435184 | 2.20530556 | 569.645774 |
| cg20898273 | 0.00643636 | 10.7592704 | 1.94797476 | 59.4267966 | cg20878190 | 0.01179878 | 1.7326E+11 | 309.795136 | 9.69E+19   |
| cg07394955 | 0.00643721 | 54.043471  | 3.06405793 | 953.211989 | cg18152871 | 0.01179998 | 8.99E-23   | 6.22E-40   | 1.30E-05   |
| cg19801120 | 0.00643928 | 55.3763093 | 3.08473362 | 994.100627 | cg03460527 | 0.01180142 | 295.3898   | 3.52782225 | 24733.427  |
| cg15718811 | 0.00644022 | 25.6862034 | 2.48643394 | 265.352332 | cg05226168 | 0.01180498 | 18.8677341 | 1.91730939 | 185.672376 |
| cg17864516 | 0.00644127 | 209105766  | 216.10551  | 2.0233E+14 | cg02583309 | 0.01181589 | 6.68378801 | 1.52313128 | 29.3297253 |
| cg27211696 | 0.00644184 | 46.6924007 | 2.94016509 | 741.516281 | cg04724058 | 0.01182478 | 8468780.39 | 34.1901394 | 2.0977E+12 |
| cg06033194 | 0.00644336 | 413.651735 | 5.42181258 | 31559.1429 | cg16568036 | 0.01182537 | 103.816125 | 2.7952064  | 3855.81111 |
| cg17861791 | 0.00644481 | 5069.01336 | 10.9499235 | 2346582.27 | cg15773539 | 0.01182976 | 104.725218 | 2.80008051 | 3916.80568 |
| cg09820792 | 0.00644672 | 14.4089256 | 2.11359855 | 98.2292197 | cg19564884 | 0.01183335 | 88226.7447 | 12.4341681 | 626013611  |
| cg11159091 | 0.00644951 | 41.0546735 | 2.83481078 | 594.56745  | cg09652501 | 0.01184191 | 16991.1548 | 8.62886893 | 33457379.3 |
| cg10300057 | 0.00645146 | 9.2546E+11 | 2270.22988 | 3.77E+20   | cg26013028 | 0.01184619 | 379.462665 | 3.72005866 | 38706.8935 |

|            |            |            |            |            |            |            |            |            |            |
|------------|------------|------------|------------|------------|------------|------------|------------|------------|------------|
| cg11910375 | 0.0064559  | 13.4297482 | 2.07161293 | 87.0616966 | cg24421668 | 0.01184621 | 21.9041169 | 1.9794458  | 242.386194 |
| cg21396517 | 0.00645607 | 7.39669221 | 1.75256834 | 31.2176447 | cg13811713 | 0.01184865 | 107.785468 | 2.81569693 | 4126.05029 |
| cg20583945 | 0.00645617 | 10.0176664 | 1.90813883 | 52.5924203 | cg16676472 | 0.01185132 | 8.20E-09   | 4.13E-15   | 0.01627755 |
| cg16354207 | 0.0064606  | 270.118908 | 4.80452329 | 15186.569  | cg02891726 | 0.01185952 | 0.06643883 | 0.00803891 | 0.54909434 |
| cg06301673 | 0.00646463 | 9.9431767  | 1.90364948 | 51.9353819 | cg10246448 | 0.011872   | 41.6208694 | 2.27945368 | 759.961381 |
| cg26159395 | 0.0064672  | 46.9009101 | 2.93996284 | 748.205161 | cg11779239 | 0.01188147 | 12.5156026 | 1.74749662 | 89.6369731 |
| cg04992638 | 0.00646789 | 3.63362746 | 1.43558159 | 9.19714259 | cg11277662 | 0.01188399 | 0.01641214 | 0.00066764 | 0.40344916 |
| cg07125725 | 0.0064701  | 18.189214  | 2.25428307 | 146.763958 | cg15021670 | 0.01189165 | 20.3517389 | 1.94506795 | 212.945402 |
| cg17789479 | 0.00647979 | 9.1002E+17 | 107127.177 | 7.73E+30   | cg05523897 | 0.01189172 | 18.0316049 | 1.89377044 | 171.688589 |
| cg27248189 | 0.00647995 | 23.1924199 | 2.412114   | 222.994577 | cg23719130 | 0.01189567 | 16645.9007 | 8.54859571 | 32413044.2 |
| cg08695855 | 0.00648192 | 9.86882661 | 1.89863498 | 51.2967156 | cg25851425 | 0.01190654 | 44410.8716 | 10.6050973 | 185979012  |
| cg20202112 | 0.00648698 | 9.95858124 | 1.9031563  | 52.1099294 | cg27377289 | 0.01191753 | 12.6876335 | 1.75130061 | 91.9179967 |
| cg24850474 | 0.00648799 | 70.6468597 | 3.29368624 | 1515.31701 | cg06731484 | 0.01192063 | 8.46650786 | 1.60172274 | 44.7529111 |
| cg26996201 | 0.00649142 | 6.24132056 | 1.66960313 | 23.3313424 | cg09601584 | 0.01192066 | 18.1986905 | 1.89616995 | 174.663847 |
| cg18952098 | 0.00649282 | 2455.92813 | 8.89043853 | 678434.812 | cg14849065 | 0.01192767 | 30.9839221 | 2.13179324 | 450.326708 |
| cg09634802 | 0.00649283 | 5001052841 | 518.526153 | 4.8234E+16 | cg22923268 | 0.0119303  | 8447.91893 | 7.33872598 | 9724758.01 |
| cg24991933 | 0.00649697 | 0.01431664 | 0.00067261 | 0.30473476 | cg16717690 | 0.01193214 | 44133.0067 | 10.5638638 | 184375936  |
| cg27140083 | 0.00649787 | 1109720.63 | 49.1639899 | 2.5048E+10 | cg02853019 | 0.01193529 | 6029.12832 | 6.81011398 | 5337706.3  |
| cg04380939 | 0.00650062 | 11.2106143 | 1.96644409 | 63.9112365 | cg01353524 | 0.01193953 | 221633.705 | 15.0643677 | 3260774043 |
| cg18018798 | 0.00650382 | 36913969.4 | 130.900013 | 1.041E+13  | cg15457058 | 0.01194009 | 5.41662644 | 1.4510384  | 20.2198935 |
| cg14103123 | 0.00650407 | 13.5726256 | 2.0742527  | 88.8108603 | cg06200512 | 0.01194311 | 1140396305 | 98.9676808 | 1.3141E+16 |
| cg03912887 | 0.00650464 | 418718.963 | 37.383914  | 4689866612 | cg19458266 | 0.01194743 | 656.491643 | 4.17439791 | 103243.937 |
| cg20018469 | 0.00650543 | 37609.448  | 19.0480941 | 74257853.4 | cg10523140 | 0.01194765 | 11.5186782 | 1.713204   | 77.4455041 |
| cg18478175 | 0.00651498 | 369.219303 | 5.22178329 | 26106.5781 | cg23115158 | 0.01194941 | 4005786.58 | 28.4678349 | 5.6367E+11 |
| cg14788660 | 0.00651509 | 155757.064 | 28.3017592 | 857199818  | cg05136476 | 0.01195765 | 143.540587 | 2.98502313 | 6902.42563 |
| cg18353196 | 0.00651739 | 21.9417788 | 2.37126134 | 203.031883 | cg06240896 | 0.01197276 | 20061.8253 | 8.8460807  | 45497757.3 |
| cg13093774 | 0.00651955 | 5.94016892 | 1.6455402  | 21.4431751 | cg11690979 | 0.01197665 | 8.26902914 | 1.59168184 | 42.9588635 |
| cg04071446 | 0.00652302 | 6278.74214 | 11.5208365 | 3421852.48 | cg17147211 | 0.01198928 | 12.5912763 | 1.74545198 | 90.8304785 |
| cg17527393 | 0.00652553 | 17472.3045 | 15.3309864 | 19912706   | cg23273897 | 0.01199078 | 10.3730129 | 1.67257613 | 64.3315387 |
| cg10024406 | 0.00653389 | 7.78564872 | 1.77411564 | 34.167066  | cg05460965 | 0.01199148 | 33.6613932 | 2.16665199 | 522.967878 |

|            |            |            |            |            |            |            |            |            |            |
|------------|------------|------------|------------|------------|------------|------------|------------|------------|------------|
| cg03834567 | 0.00653467 | 55.7909979 | 3.07526019 | 1012.15352 | cg03948207 | 0.01200706 | 339032.666 | 16.4140074 | 7002747436 |
| cg16209444 | 0.00653598 | 15.0623393 | 2.13309194 | 106.359253 | cg25509428 | 0.01200864 | 125814.283 | 13.1989968 | 1199275528 |
| cg11408656 | 0.00653696 | 12333.7153 | 13.8890512 | 10952550.4 | cg23927983 | 0.01201262 | 91496419.6 | 56.1091879 | 1.492E+14  |
| cg12848614 | 0.00653893 | 37.6243454 | 2.75421874 | 513.97202  | cg14657834 | 0.01202034 | 8.45744716 | 1.59822933 | 44.7547865 |
| cg18352648 | 0.00654    | 0.10846178 | 0.02187603 | 0.53775566 | cg02165978 | 0.01202079 | 433849.732 | 17.2998443 | 1.088E+10  |
| cg25510614 | 0.00654488 | 14.5279339 | 2.11100294 | 99.9813213 | cg06150468 | 0.01204037 | 23.6635976 | 2.00227083 | 279.665389 |
| cg19127747 | 0.0065483  | 39.0495828 | 2.78168791 | 548.181523 | cg25634545 | 0.01204814 | 21831.9148 | 8.95047232 | 53252217.9 |
| cg00468144 | 0.00654925 | 3.3348E+13 | 5954.77485 | 1.87E+23   | cg25644556 | 0.01204858 | 6.29954922 | 1.49739885 | 26.5021709 |
| cg00579105 | 0.00655909 | 1100.40216 | 7.05710129 | 171583.893 | cg14562523 | 0.01205233 | 27.6453573 | 2.07103187 | 369.026567 |
| cg05887405 | 0.00656046 | 7.1689265  | 1.73246875 | 29.6648972 | cg27531553 | 0.0120587  | 17.383614  | 1.87035618 | 161.568175 |
| cg05357695 | 0.00656464 | 14.7245176 | 2.11743308 | 102.393517 | cg22345522 | 0.0120713  | 198173.841 | 14.4834195 | 2711574518 |
| cg13265524 | 0.00656805 | 13.7273109 | 2.07616869 | 90.7628873 | cg27637948 | 0.01207703 | 147.302788 | 2.98579474 | 7267.11423 |
| cg07774177 | 0.00656861 | 211.349168 | 4.45045994 | 10036.8213 | cg17603132 | 0.01207752 | 10.3806096 | 1.66975274 | 64.5347377 |
| cg14512004 | 0.0065716  | 1.0333E+10 | 620.025127 | 1.7222E+17 | cg15945129 | 0.01207846 | 6.71777108 | 1.51787544 | 29.7313252 |
| cg11566061 | 0.00658328 | 10.0254247 | 1.90105686 | 52.8701385 | cg01440333 | 0.01207919 | 21.5771028 | 1.9599937  | 237.537175 |
| cg08247376 | 0.00658376 | 4.53427584 | 1.52390022 | 13.4914721 | cg09954820 | 0.01208622 | 12.0860933 | 1.7260001  | 84.6313105 |
| cg24272980 | 0.00658723 | 0.00536506 | 0.00012353 | 0.23301277 | cg02144933 | 0.0120877  | 11.6733696 | 1.71285851 | 79.555641  |
| cg06822966 | 0.00658791 | 273216.123 | 32.7153943 | 2281710233 | cg00846502 | 0.01209512 | 0.06426221 | 0.00753173 | 0.54829777 |
| cg14777244 | 0.00659419 | 116.239878 | 3.76087445 | 3592.70415 | cg07312366 | 0.01209575 | 2.6305E+10 | 191.10822  | 3.6207E+18 |
| cg00123512 | 0.00659682 | 1760110096 | 375.794447 | 8.2438E+15 | cg24959938 | 0.01209659 | 0.07912336 | 0.01090931 | 0.57386801 |
| cg26057784 | 0.00659711 | 16.4941806 | 2.18288478 | 124.632319 | cg20930060 | 0.01210063 | 1.4474E+13 | 759.78997  | 2.76E+23   |
| cg17246382 | 0.00660282 | 9.37543556 | 1.86478596 | 47.1361292 | cg02927327 | 0.01210856 | 13.2111711 | 1.75905532 | 99.2208944 |
| cg11805463 | 0.00660605 | 0.05726534 | 0.00727055 | 0.4510416  | cg05341353 | 0.01211562 | 4510.04917 | 6.30024933 | 3228529.93 |
| cg05807291 | 0.00660744 | 13.8993096 | 2.08051176 | 92.857349  | cg17334359 | 0.01212607 | 40.5359516 | 2.24680279 | 731.334044 |
| cg07331806 | 0.00661178 | 54.2314965 | 3.03847811 | 967.936943 | cg19632236 | 0.01212771 | 9.32387284 | 1.62927457 | 53.3578603 |
| cg21520826 | 0.00661251 | 51757147.1 | 140.211999 | 1.9105E+13 | cg01957900 | 0.01212801 | 0.03660878 | 0.00276202 | 0.48522555 |
| cg14045725 | 0.00661922 | 33.9160382 | 2.66546217 | 431.556546 | cg14667731 | 0.01213067 | 5138230.86 | 29.3146049 | 9.0062E+11 |
| cg14075221 | 0.00662161 | 22.2451095 | 2.3701182  | 208.784901 | cg04757806 | 0.01213378 | 0.0615647  | 0.00697107 | 0.54370591 |
| cg09168604 | 0.00662942 | 5.79170707 | 1.6297324  | 20.5824408 | cg17759086 | 0.01214042 | 86.3604267 | 2.6493296  | 2815.09832 |
| cg00320059 | 0.00663143 | 182339.632 | 29.0249438 | 1145488575 | cg07971863 | 0.01218376 | 45.9032486 | 2.30411611 | 914.497417 |



|            |            |            |            |            |            |            |            |            |            |
|------------|------------|------------|------------|------------|------------|------------|------------|------------|------------|
| cg00661320 | 0.00663202 | 17.5269798 | 2.21716995 | 138.552762 | cg04822518 | 0.01218515 | 16.7743367 | 1.84978459 | 152.114129 |
| cg18599117 | 0.00663775 | 342450982  | 235.668724 | 4.9762E+14 | cg10971510 | 0.01218895 | 10.6131683 | 1.67387639 | 67.2925083 |
| cg04712436 | 0.00664399 | 15305.1325 | 14.5506669 | 16098717.8 | cg19641839 | 0.01219508 | 0.04139206 | 0.00343076 | 0.49939522 |
| cg21916655 | 0.00664777 | 4901.90017 | 10.5997101 | 2266913.43 | cg24421410 | 0.01219942 | 8.70977721 | 1.60292866 | 47.3260108 |
| cg23273897 | 0.00665054 | 9.79375866 | 1.88485987 | 50.8885093 | cg27455796 | 0.01220914 | 3371039.5  | 26.4501345 | 4.2964E+11 |
| cg18605031 | 0.00665167 | 8.12501857 | 1.78949058 | 36.8909048 | cg05096161 | 0.01221137 | 11.9448291 | 1.71672393 | 83.1111742 |
| cg09239591 | 0.00665753 | 22.1974877 | 2.36520868 | 208.323461 | cg21384402 | 0.01221787 | 6.06866207 | 1.48107662 | 24.8661404 |
| cg22376366 | 0.00666366 | 1.95E-05   | 7.69E-09   | 0.04922469 | cg19712821 | 0.0122287  | 18.9782768 | 1.89806804 | 189.758736 |
| cg02926965 | 0.00666538 | 582.358548 | 5.85608858 | 57912.6279 | cg10314411 | 0.01223919 | 0.02426977 | 0.0013231  | 0.44518155 |
| cg06727065 | 0.00667503 | 45.341689  | 2.88155409 | 713.458329 | cg01593886 | 0.01224244 | 35.9700016 | 2.18061093 | 593.338775 |
| cg24326232 | 0.00667581 | 14.1972782 | 2.08780193 | 96.5430228 | cg22968727 | 0.01225205 | 8811.38699 | 7.21296239 | 10764029.6 |
| cg16773799 | 0.00667597 | 1460.63053 | 7.55131335 | 282525.893 | cg27533013 | 0.01225273 | 3876994785 | 121.787047 | 1.2342E+17 |
| cg01052428 | 0.00667898 | 31843.2018 | 17.7505603 | 57124366   | cg05155520 | 0.01225853 | 0.15059793 | 0.03423168 | 0.66253649 |
| cg27598407 | 0.00668007 | 10.4334038 | 1.91652167 | 56.7986868 | cg09807229 | 0.01226216 | 21983.3815 | 8.79191051 | 54967468.5 |
| cg01440333 | 0.00668142 | 19.6908437 | 2.28564499 | 169.636723 | cg18617679 | 0.01226854 | 248.353626 | 3.31598226 | 18600.6796 |
| cg27037013 | 0.00668219 | 29.8874454 | 2.56603521 | 348.108783 | cg15909016 | 0.01227314 | 33266421   | 43.1254374 | 2.5661E+13 |
| cg22697962 | 0.00668611 | 6.8829941  | 1.70739715 | 27.7472689 | cg02204038 | 0.01227932 | 475099547  | 76.7740499 | 2.9401E+15 |
| cg06101723 | 0.0066903  | 233837.746 | 30.8051858 | 1775028778 | cg27629124 | 0.01227991 | 0.09605358 | 0.01534943 | 0.60108378 |
| cg03693099 | 0.00669064 | 486.978323 | 5.56091511 | 42645.4787 | cg01557883 | 0.01228093 | 4009834.06 | 27.2002548 | 5.9113E+11 |
| cg17129986 | 0.00669065 | 8.61700589 | 1.81693472 | 40.8670656 | cg10321263 | 0.01228477 | 0.0370675  | 0.00281082 | 0.48882538 |
| cg02916459 | 0.00669274 | 388.057471 | 5.22074421 | 28844.2786 | cg12680131 | 0.01229144 | 0.28351412 | 0.10568889 | 0.76053643 |
| cg21576698 | 0.00669418 | 2861.65252 | 9.0829974  | 901580.7   | cg07113947 | 0.01229301 | 6611193205 | 135.660373 | 3.2219E+17 |
| cg22760295 | 0.00669444 | 661327.811 | 41.0669482 | 1.065E+10  | cg21774561 | 0.01229407 | 4770.62542 | 6.29158085 | 3617352.68 |
| cg00582337 | 0.00670097 | 21.9337115 | 2.35319267 | 204.440421 | cg20583141 | 0.01229849 | 19.2968691 | 1.90141677 | 195.837736 |
| cg01081091 | 0.00670181 | 3704.05422 | 9.74843756 | 1407406.84 | cg07218275 | 0.01230539 | 286.378056 | 3.41385804 | 24023.3747 |
| cg09598437 | 0.00670329 | 14.9588762 | 2.11621343 | 105.739796 | cg02873371 | 0.01230862 | 1554.67362 | 4.92730435 | 490533.947 |
| cg23456144 | 0.00670571 | 103.977745 | 3.62094028 | 2985.79117 | cg25864727 | 0.01231626 | 0.13497376 | 0.02813075 | 0.64761572 |
| cg22583148 | 0.00670808 | 7.70322845 | 1.76050522 | 33.7060793 | cg11770080 | 0.01232084 | 7.52595479 | 1.54925924 | 36.5594046 |
| cg06926254 | 0.00671509 | 36284.1603 | 18.3133928 | 71889480.2 | cg19240052 | 0.01233339 | 552.479489 | 3.93090424 | 77649.7128 |
| cg14400886 | 0.00671878 | 7.45913425 | 1.74437626 | 31.8960336 | cg03709297 | 0.01234299 | 0.08847504 | 0.01323927 | 0.59125879 |

|            |            |            |            |            |            |            |            |            |            |
|------------|------------|------------|------------|------------|------------|------------|------------|------------|------------|
| cg24283914 | 0.00672192 | 67779184.6 | 147.245203 | 3.12E+13   | cg15253243 | 0.01234948 | 115504.795 | 12.4957814 | 1067668938 |
| cg03753597 | 0.00672229 | 481022.122 | 37.4141255 | 6184356272 | cg12216208 | 0.01235684 | 6.06172706 | 1.47737324 | 24.8715314 |
| cg27531336 | 0.00672297 | 12.5581182 | 2.01475544 | 78.2756701 | cg01966160 | 0.01236198 | 14.5175005 | 1.78477024 | 118.086807 |
| cg03081691 | 0.00672299 | 6.15366741 | 1.65371589 | 22.8985057 | cg20949959 | 0.01236579 | 122300695  | 56.348187  | 2.6545E+14 |
| cg05851813 | 0.00672368 | 45918684.5 | 132.143851 | 1.5956E+13 | cg19118262 | 0.01236905 | 14457.4826 | 7.95267976 | 26282814.2 |
| cg26541003 | 0.00672538 | 16461.3722 | 14.6939198 | 18441421.9 | cg26985711 | 0.01237931 | 20.0969821 | 1.91408871 | 211.008345 |
| cg22957613 | 0.00672675 | 0.06324157 | 0.0085876  | 0.46572918 | cg25096582 | 0.01238414 | 119405.879 | 12.5403616 | 1136949980 |
| cg14892066 | 0.00672753 | 28041.5499 | 17.0234177 | 46190990.1 | cg06762403 | 0.01238783 | 284.58028  | 3.39496871 | 23854.6929 |
| cg05335944 | 0.00672926 | 9.05028227 | 1.83975396 | 44.5209583 | cg23244913 | 0.01239599 | 6.61961363 | 1.50481515 | 29.1193802 |
| cg10883621 | 0.00673479 | 10.5121529 | 1.91726697 | 57.6369174 | cg18672998 | 0.01239753 | 0.01123799 | 0.0003333  | 0.37891372 |
| cg10616515 | 0.00673809 | 298676.09  | 32.7074333 | 2727435253 | cg02988775 | 0.01240097 | 16.3217912 | 1.82883511 | 145.666969 |
| cg13354228 | 0.00674105 | 8.73E-15   | 5.90E-25   | 0.0001292  | cg14935646 | 0.01241033 | 17.0496238 | 1.84572625 | 157.493383 |
| cg10454937 | 0.00674108 | 9.78993403 | 1.87952463 | 50.993111  | cg21956537 | 0.01243128 | 593475.282 | 17.6409172 | 1.9966E+10 |
| cg27367469 | 0.00675121 | 18.4366758 | 2.23829457 | 151.861609 | cg16385335 | 0.01243234 | 13.0017976 | 1.73984767 | 97.1618052 |
| cg14579819 | 0.0067539  | 14.1126779 | 2.07867434 | 95.8147567 | cg15402162 | 0.01243444 | 25.6816896 | 2.01515533 | 327.294463 |
| cg24805759 | 0.00675744 | 18.7355423 | 2.24772887 | 156.166765 | cg03056526 | 0.01243856 | 29.8723527 | 2.08173649 | 428.66014  |
| cg01147995 | 0.00675915 | 3600504.7  | 64.8519965 | 1.999E+11  | cg23401796 | 0.01244004 | 0.26589525 | 0.09409909 | 0.75133865 |
| cg12798700 | 0.00677489 | 17107.147  | 14.7574789 | 19830926.4 | cg15846316 | 0.01244326 | 7.3204708  | 1.53662521 | 34.8746671 |
| cg17369196 | 0.0067874  | 32.6788786 | 2.61772559 | 407.953037 | cg07375912 | 0.01244641 | 1119155.89 | 20.1921927 | 6.2029E+10 |
| cg05816157 | 0.00679656 | 20.1883855 | 2.29107921 | 177.894726 | cg25114752 | 0.01244711 | 0.10920924 | 0.01923223 | 0.62013898 |
| cg10150530 | 0.00679736 | 4.79079965 | 1.54062858 | 14.8976603 | cg07461318 | 0.01245949 | 901.310202 | 4.33745572 | 187289.538 |
| cg00402172 | 0.00679857 | 8.3196122  | 1.79393139 | 38.5833861 | cg07870237 | 0.01245992 | 14.9271406 | 1.79130703 | 124.389356 |
| cg09954813 | 0.0067988  | 9.38632837 | 1.8546208  | 47.504676  | cg24991933 | 0.01246352 | 0.0120159  | 0.00037459 | 0.385441   |
| cg02956255 | 0.00679948 | 34.6301896 | 2.6584751  | 451.104484 | cg20371266 | 0.01246776 | 10.1705818 | 1.64878988 | 62.7373662 |
| cg04482943 | 0.00680446 | 2706818.88 | 59.4109439 | 1.2333E+11 | cg09244244 | 0.0124807  | 20.032518  | 1.90756803 | 210.373507 |
| cg11612345 | 0.00680498 | 9.07752046 | 1.83725866 | 44.8501779 | cg00260114 | 0.01248463 | 8163.82079 | 6.96215688 | 9572891.14 |
| cg23967249 | 0.0068071  | 1.0098E+17 | 48825.2129 | 2.09E+29   | cg05691004 | 0.01248795 | 0.08857584 | 0.01322454 | 0.59326683 |
| cg14849526 | 0.0068083  | 816405.28  | 42.6597277 | 1.5624E+10 | cg11357542 | 0.01249547 | 66.771932  | 2.47114421 | 1804.22125 |
| cg11538128 | 0.00681271 | 8.69934259 | 1.81542842 | 41.6863372 | cg19886978 | 0.01249853 | 2784.48394 | 5.51669216 | 1405434.74 |
| cg07383443 | 0.00682013 | 2773.62465 | 8.88747677 | 865599.305 | cg18542853 | 0.01250683 | 0.08068213 | 0.01119058 | 0.58170394 |

|            |            |            |            |            |            |            |            |            |            |
|------------|------------|------------|------------|------------|------------|------------|------------|------------|------------|
| cg26293590 | 0.00682496 | 67.8538666 | 3.19595017 | 1440.61921 | cg18940113 | 0.01251176 | 82.8444123 | 2.58696183 | 2652.99494 |
| cg10510478 | 0.00682749 | 6.04884014 | 1.64181927 | 22.2853195 | cg08389277 | 0.01251233 | 21.4136196 | 1.93349804 | 237.157264 |
| cg19040032 | 0.00682924 | 20973.8471 | 15.5018609 | 28377384.4 | cg22864672 | 0.01252565 | 1087.93827 | 4.49852049 | 263110.876 |
| cg00826842 | 0.00683107 | 492118.615 | 36.9585883 | 6552759250 | cg26156179 | 0.0125319  | 3193262.05 | 25.0309012 | 4.0737E+11 |
| cg00531137 | 0.00683199 | 6.51085938 | 1.67526408 | 25.3042434 | cg09571713 | 0.0125408  | 10.5725007 | 1.66007425 | 67.332995  |
| cg08267698 | 0.00683736 | 1315652913 | 324.232519 | 5.3386E+15 | cg11933779 | 0.0125448  | 9.05439617 | 1.60555332 | 51.0615804 |
| cg12894325 | 0.00683751 | 86.8836862 | 3.41870586 | 2208.07968 | cg01501819 | 0.01254619 | 5.64281556 | 1.4503865  | 21.9537119 |
| cg02466815 | 0.00684096 | 4.55200732 | 1.51774257 | 13.6523618 | cg05397514 | 0.01255502 | 6236987458 | 127.058958 | 3.0616E+17 |
| cg25789201 | 0.00685063 | 62219.5176 | 20.8510324 | 185663150  | cg06499652 | 0.01256249 | 34961.0389 | 9.45542316 | 129267006  |
| cg18307767 | 0.006851   | 642616455  | 265.222275 | 1.557E+15  | cg15813594 | 0.01256853 | 18.9728402 | 1.88102811 | 191.368042 |
| cg11097541 | 0.00685141 | 16.4864391 | 2.16222084 | 125.705326 | cg10883621 | 0.01256903 | 11.8475695 | 1.70014864 | 82.5603715 |
| cg17727579 | 0.00685812 | 0.06299153 | 0.00848877 | 0.46743328 | cg19197795 | 0.01257255 | 104.849343 | 2.71463938 | 4049.66673 |
| cg27626899 | 0.00685837 | 438893.582 | 35.6467539 | 5403790107 | cg16529993 | 0.01257292 | 212519.239 | 13.9156169 | 3245592862 |
| cg11341981 | 0.00686056 | 9.17684084 | 1.83982561 | 45.7730381 | cg02019072 | 0.01258097 | 295.955255 | 3.39047953 | 25833.96   |
| cg04368796 | 0.0068619  | 706.76806  | 6.07586338 | 82214.0095 | cg06887580 | 0.01259139 | 36.9095697 | 2.16831549 | 628.283266 |
| cg27629124 | 0.0068644  | 0.10911149 | 0.02189347 | 0.54378402 | cg05704893 | 0.01260689 | 2978.52437 | 5.55433373 | 1597240.62 |
| cg11171429 | 0.00686762 | 11322.7273 | 13.020168  | 9846582.19 | cg24716879 | 0.01260992 | 4.29245946 | 1.36646938 | 13.4838061 |
| cg26766373 | 0.00686815 | 11.1819194 | 1.94212788 | 64.380581  | cg05748497 | 0.01261233 | 1360.42205 | 4.69389762 | 394288.137 |
| cg24700222 | 0.00687103 | 10.6855632 | 1.91786424 | 59.5356328 | cg06892005 | 0.01261557 | 1.4106E+12 | 401.067735 | 4.96E+21   |
| cg09481857 | 0.00687293 | 23.3272261 | 2.37680633 | 228.945654 | cg16819803 | 0.01262046 | 21.0784081 | 1.92131131 | 231.247944 |
| cg05909880 | 0.00687507 | 2.5671E+11 | 1367.32975 | 4.8195E+19 | cg13612524 | 0.01263326 | 3244.12152 | 5.64628624 | 1863937.46 |
| cg09122913 | 0.00687562 | 808.338417 | 6.29692455 | 103766.686 | cg05585263 | 0.01264821 | 0.08443806 | 0.01209968 | 0.58925401 |
| cg04975205 | 0.00687596 | 486951.805 | 36.5708102 | 6483915960 | cg04505439 | 0.01265973 | 165253.06  | 13.0628671 | 2090549760 |
| cg16478719 | 0.00687919 | 46.7106306 | 2.87573045 | 758.723059 | cg04085707 | 0.01266349 | 2102448.17 | 22.4942271 | 1.9651E+11 |
| cg07235053 | 0.0068814  | 0.10874156 | 0.02175494 | 0.54354223 | cg21692194 | 0.01266415 | 13.658261  | 1.74900028 | 106.659842 |
| cg01434197 | 0.00688673 | 1591.17179 | 7.57713372 | 334140.557 | cg10985987 | 0.01266572 | 3629.84459 | 5.77015308 | 2283435.39 |
| cg07000334 | 0.00688796 | 32.5914296 | 2.60388687 | 407.929122 | cg02275713 | 0.0126674  | 16.021049  | 1.80956101 | 141.843248 |
| cg24589113 | 0.00689006 | 449238.167 | 35.6845072 | 5655533626 | cg17735372 | 0.01267706 | 18.0885151 | 1.85667586 | 176.225901 |
| cg03760060 | 0.00689616 | 0.01380538 | 0.00061772 | 0.30853362 | cg21339084 | 0.01269174 | 32.9980281 | 2.11027525 | 515.984756 |
| cg07242710 | 0.00689663 | 4.38E-06   | 5.68E-10   | 0.03378958 | cg02083559 | 0.01269196 | 5.06918749 | 1.41438895 | 18.1680306 |

|            |            |            |            |            |            |            |            |            |            |
|------------|------------|------------|------------|------------|------------|------------|------------|------------|------------|
| cg07218357 | 0.00689667 | 11.8756634 | 1.97273098 | 71.490428  | cg14226064 | 0.01269801 | 10.6585608 | 1.65749749 | 68.540024  |
| cg05556202 | 0.00690384 | 0.07624611 | 0.01178258 | 0.49339546 | cg00263248 | 0.01269807 | 23.8756358 | 1.96899774 | 289.510735 |
| cg06182274 | 0.0069043  | 23.2801124 | 2.37244935 | 228.44055  | cg10250177 | 0.01270657 | 23.2987472 | 1.95827832 | 277.198402 |
| cg11594683 | 0.00690499 | 7.12E-06   | 1.31E-09   | 0.03864907 | cg13075322 | 0.01270742 | 0.02437535 | 0.00131285 | 0.45257064 |
| cg00557236 | 0.00690765 | 0.01260459 | 0.00052762 | 0.30111594 | cg12058507 | 0.01271608 | 0.0008264  | 3.11E-06   | 0.2198839  |
| cg08307816 | 0.00690951 | 7.54377304 | 1.74105708 | 32.6861837 | cg06840042 | 0.01271894 | 4.21E-07   | 4.06E-12   | 0.04361402 |
| cg14262490 | 0.00691036 | 7.09E-12   | 5.76E-20   | 0.00087232 | cg01243246 | 0.01272408 | 160.200262 | 2.95306279 | 8690.68003 |
| cg26792589 | 0.00691129 | 403.258243 | 5.18704494 | 31350.6462 | cg11844827 | 0.01272735 | 1.3069E+15 | 1674.86943 | 1.02E+27   |
| cg14851471 | 0.00691911 | 65.7136495 | 3.15169827 | 1370.14503 | cg04569641 | 0.0127371  | 0.14193046 | 0.0305438  | 0.6595202  |
| cg03265267 | 0.00692268 | 527.202034 | 5.57770629 | 49830.875  | cg04327181 | 0.01274573 | 66.0770848 | 2.44278049 | 1787.3817  |
| cg19066060 | 0.00692562 | 46637.0145 | 19.0608439 | 114108858  | cg12018140 | 0.01274754 | 25.9361762 | 2.00126863 | 336.129405 |
| cg05554353 | 0.00692739 | 8.4254E+13 | 6576.67144 | 1.08E+24   | cg04364728 | 0.01274764 | 20.3461253 | 1.90037044 | 217.833748 |
| cg20473595 | 0.00692871 | 11.6676612 | 1.96118686 | 69.4142515 | cg02478603 | 0.01275887 | 0.13800202 | 0.02903867 | 0.65583433 |
| cg01894110 | 0.00693077 | 9027.09636 | 12.1430527 | 6710707.01 | cg14041079 | 0.01276201 | 1.1234E+15 | 1604.62947 | 7.87E+26   |
| cg17211192 | 0.00693337 | 7005.77316 | 11.3245225 | 4334033.31 | cg18592307 | 0.01277527 | 310.739844 | 3.39254242 | 28462.2087 |
| cg06846310 | 0.00693795 | 13.6209201 | 2.04556422 | 90.6984302 | cg13676119 | 0.01277631 | 11640.1837 | 7.33554879 | 18470857.4 |
| cg03839625 | 0.00693925 | 3582.33544 | 9.4169222  | 1362772.99 | cg05184938 | 0.01279072 | 9.53802728 | 1.61566735 | 56.3073608 |
| cg19592277 | 0.0069551  | 6.96064595 | 1.70110048 | 28.4819107 | cg23681866 | 0.01279821 | 5.2728057  | 1.42411916 | 19.5225798 |
| cg21295088 | 0.00695522 | 13.2106887 | 2.02732888 | 86.0848464 | cg02643054 | 0.01280364 | 9.87734655 | 1.62730341 | 59.9531557 |
| cg06618097 | 0.00695606 | 24.3533584 | 2.39686333 | 247.442588 | cg02287056 | 0.01280841 | 8310541541 | 128.403707 | 5.3787E+17 |
| cg14944944 | 0.00697043 | 44.6744727 | 2.82803906 | 705.721691 | cg26483081 | 0.0128111  | 2031817927 | 95.1308639 | 4.3396E+16 |
| cg00735304 | 0.00698753 | 1061297948 | 293.524891 | 3.8373E+15 | cg22995904 | 0.01281197 | 0.10182613 | 0.01684935 | 0.61536876 |
| cg08327378 | 0.00698801 | 584.985375 | 5.70840375 | 59948.0878 | cg22027897 | 0.01281369 | 12.7345597 | 1.7172401  | 94.4358393 |
| cg27573806 | 0.00699007 | 172849.553 | 27.0269296 | 1105451803 | cg19519964 | 0.01281419 | 2597.35277 | 5.31668113 | 1268882.08 |
| cg03473294 | 0.00699155 | 6.2776E+10 | 894.411596 | 4.406E+18  | cg00599393 | 0.01281535 | 744298457  | 76.7879414 | 7.2144E+15 |
| cg20261082 | 0.00699165 | 18324.7259 | 14.6312032 | 22950647   | cg13623495 | 0.01281924 | 13.6221971 | 1.74178599 | 106.536771 |
| cg24521811 | 0.00699819 | 32.3923443 | 2.58669535 | 405.638788 | cg10248985 | 0.0128206  | 45.1056359 | 2.24624166 | 905.743326 |
| cg16608407 | 0.00699909 | 11.7570215 | 1.96091311 | 70.4914228 | cg24363820 | 0.01282428 | 12.1510546 | 1.69981298 | 86.8613959 |
| cg10336707 | 0.00701066 | 9.98341998 | 1.87458274 | 53.1684585 | cg22160883 | 0.01283508 | 122.075688 | 2.77369337 | 5372.79058 |
| cg19878838 | 0.00701191 | 2219.99627 | 8.20048967 | 600986.482 | cg08288330 | 0.0128375  | 1319313.23 | 19.9258313 | 8.7353E+10 |

|            |            |            |            |            |            |            |            |            |            |
|------------|------------|------------|------------|------------|------------|------------|------------|------------|------------|
| cg03434509 | 0.00701985 | 7.90046658 | 1.75810391 | 35.5026638 | cg18229767 | 0.01284288 | 13.7332181 | 1.7438447  | 108.152566 |
| cg10574494 | 0.00702248 | 14.3041719 | 2.06720551 | 98.9787092 | cg02705837 | 0.01285531 | 7.39865974 | 1.52895605 | 35.8023148 |
| cg09676684 | 0.0070232  | 6.38741186 | 1.6588459  | 24.5948284 | cg22806837 | 0.01285579 | 7.71306838 | 1.54250229 | 38.5681268 |
| cg15692032 | 0.00702357 | 94316.3173 | 22.7900124 | 390327462  | cg04380635 | 0.01286438 | 58609976.4 | 44.4012312 | 7.7366E+13 |
| cg00255368 | 0.00703378 | 14.3750697 | 2.06920009 | 99.8659475 | cg22376864 | 0.01287365 | 17.3161637 | 1.83039392 | 163.816937 |
| cg19255465 | 0.00703561 | 30.32172   | 2.53627391 | 362.502923 | cg11110213 | 0.01287579 | 4193.42495 | 5.85997323 | 3000835    |
| cg08085208 | 0.00703777 | 220859.678 | 28.6835033 | 1700594134 | cg18935660 | 0.01288615 | 8.61354999 | 1.57815947 | 47.0125137 |
| cg03744763 | 0.00703807 | 11.5673032 | 1.94983268 | 68.622557  | cg22416703 | 0.01289454 | 2.4383E+10 | 158.526922 | 3.7503E+18 |
| cg03744440 | 0.00705353 | 5.71234874 | 1.60794943 | 20.2935039 | cg14870223 | 0.01290646 | 17.0956712 | 1.82394115 | 160.236515 |
| cg23098599 | 0.00705367 | 5134508.52 | 67.4461315 | 3.9088E+11 | cg01370129 | 0.01290683 | 2609616.12 | 22.8252064 | 2.9836E+11 |
| cg18233810 | 0.00705476 | 204728.175 | 28.0218116 | 1495750031 | cg10482632 | 0.01290724 | 37.2423226 | 2.15074534 | 644.888339 |
| cg01655607 | 0.00705522 | 771356354  | 264.277275 | 2.2514E+15 | cg10494773 | 0.01291045 | 4.81E-06   | 3.09E-10   | 0.07488264 |
| cg17560720 | 0.00706135 | 3604997.62 | 61.1579609 | 2.125E+11  | cg19476445 | 0.01291449 | 149.893313 | 2.88719441 | 7781.95092 |
| cg27535305 | 0.00706236 | 211.67492  | 4.3013733  | 10416.7364 | cg27598407 | 0.01293496 | 10.8649567 | 1.6560622  | 71.2819147 |
| cg21746532 | 0.00706277 | 0.12032603 | 0.02577875 | 0.56163903 | cg25420952 | 0.01293646 | 16.9511519 | 1.81931613 | 157.939319 |
| cg08579540 | 0.00707919 | 9.18790814 | 1.82899717 | 46.1551595 | cg09550809 | 0.01294241 | 23.6790776 | 1.95223182 | 287.209087 |
| cg00415978 | 0.00708229 | 10.2212836 | 1.88267041 | 55.4927921 | cg18267049 | 0.01295806 | 10.2198053 | 1.63399793 | 63.9195552 |
| cg21236153 | 0.00708423 | 13.5875957 | 2.03422386 | 90.7583288 | cg03065614 | 0.01295861 | 17.0048284 | 1.81953594 | 158.921945 |
| cg22334684 | 0.00708726 | 0.00013777 | 2.13E-07   | 0.08899603 | cg05855588 | 0.01296233 | 6.87343783 | 1.50254484 | 31.4427538 |
| cg08464498 | 0.00708878 | 322.744887 | 4.8158373  | 21629.5228 | cg06241689 | 0.01296331 | 36.9984712 | 2.14396416 | 638.484027 |
| cg12705353 | 0.00709009 | 12.9701937 | 2.00825657 | 83.7671472 | cg02602480 | 0.01297565 | 7925185.54 | 28.6024802 | 2.1959E+12 |
| cg03119288 | 0.00709158 | 7729.21781 | 11.4245906 | 5229142.11 | cg22725685 | 0.01298202 | 5.91935136 | 1.4554149  | 24.0747298 |
| cg05012767 | 0.00709298 | 4.8054E+12 | 2818.89168 | 8.19E+21   | cg21616552 | 0.01298896 | 329.507698 | 3.39811437 | 31951.6389 |
| cg05940703 | 0.00709643 | 11.8757599 | 1.96026899 | 71.9460815 | cg17512993 | 0.01299502 | 570079.73  | 16.372919  | 1.9849E+10 |
| cg00263592 | 0.00709775 | 12.9580605 | 2.00724415 | 83.6526702 | cg08381596 | 0.01299787 | 269508.685 | 13.975304  | 5197377547 |
| cg12959887 | 0.00709925 | 702861501  | 254.738748 | 1.9393E+15 | cg17838626 | 0.01300178 | 97.9562146 | 2.62942342 | 3649.24869 |
| cg23713813 | 0.00710026 | 5074552.81 | 66.6178291 | 3.8655E+11 | cg25755428 | 0.01300265 | 8.12709555 | 1.55552298 | 42.461399  |
| cg21329975 | 0.00710037 | 17.711084  | 2.18508904 | 143.555933 | cg05395366 | 0.01300565 | 38142.0213 | 9.24597474 | 157345637  |
| cg20930060 | 0.00710418 | 9.2314E+11 | 1792.50899 | 4.75E+20   | cg04655372 | 0.01300581 | 1.0909E+12 | 345.18995  | 3.45E+21   |
| cg18130930 | 0.00710445 | 0.16393548 | 0.04394206 | 0.61159711 | cg05240381 | 0.01302789 | 17343061.3 | 33.4897771 | 8.9813E+12 |

|            |            |            |            |            |            |            |            |            |            |
|------------|------------|------------|------------|------------|------------|------------|------------|------------|------------|
| cg03429645 | 0.00710455 | 11.734613  | 1.95340766 | 70.4927836 | cg05027458 | 0.01303019 | 7.91319901 | 1.546033   | 40.5028345 |
| cg13208438 | 0.00710511 | 6.51664509 | 1.66467976 | 25.5104099 | cg08970083 | 0.01303523 | 40.9753212 | 2.18561107 | 768.195664 |
| cg16735821 | 0.00710567 | 1327696076 | 302.328072 | 5.8307E+15 | cg15239888 | 0.01303954 | 2659.53272 | 5.26119025 | 1344394.32 |
| cg07709606 | 0.00710867 | 9.95356598 | 1.86767915 | 53.0463038 | cg03595018 | 0.0130407  | 0.10933092 | 0.01904875 | 0.62750824 |
| cg05580277 | 0.00710984 | 0.06699945 | 0.00935965 | 0.47960403 | cg11356794 | 0.01305057 | 419.516162 | 3.56419894 | 49378.2229 |
| cg01963633 | 0.00711593 | 0.13826421 | 0.03272955 | 0.58408974 | cg11275620 | 0.01306186 | 114728.033 | 11.5963203 | 1135060197 |
| cg23473726 | 0.00711716 | 245754.472 | 29.1633075 | 2070933158 | cg18719814 | 0.01307153 | 10634.2049 | 7.02577304 | 16095924.6 |
| cg13694927 | 0.00712188 | 8.15598698 | 1.76861701 | 37.6113783 | cg15193461 | 0.01308251 | 72.5018302 | 2.46035565 | 2136.48599 |
| cg06083200 | 0.00712613 | 20.7363247 | 2.27857997 | 188.711903 | cg26477856 | 0.013085   | 13.9710218 | 1.74049616 | 112.145868 |
| cg25190465 | 0.00712976 | 1497107.18 | 47.544706  | 4.7142E+10 | cg20893919 | 0.01308903 | 95.2877835 | 2.60514156 | 3485.32373 |
| cg20180059 | 0.00713262 | 4477272801 | 417.555461 | 4.8008E+16 | cg24311704 | 0.01309219 | 23.5576892 | 1.9421028  | 285.754554 |
| cg01041284 | 0.00713812 | 125.360721 | 3.71198023 | 4233.673   | cg12768250 | 0.01310176 | 3629167487 | 101.773024 | 1.2941E+17 |
| cg00054301 | 0.007141   | 1135.80003 | 6.75051993 | 191102.57  | cg18372896 | 0.01310648 | 9.86735683 | 1.61714583 | 60.2077619 |
| cg23470128 | 0.00714123 | 11.4571711 | 1.93854092 | 67.7142118 | cg25306939 | 0.01310861 | 23.3759373 | 1.93807626 | 281.946824 |
| cg00092273 | 0.0071436  | 269758544  | 194.197543 | 3.7472E+14 | cg03721195 | 0.01311082 | 14.4823834 | 1.7526461  | 119.670154 |
| cg05226168 | 0.00714623 | 13.9141814 | 2.04318082 | 94.7563932 | cg13985198 | 0.01311912 | 38.3712002 | 2.14988462 | 684.850242 |
| cg05208572 | 0.00714666 | 26.6392171 | 2.4369374  | 291.20481  | cg16315376 | 0.01311935 | 8.92649196 | 1.58308958 | 50.3333858 |
| cg09937190 | 0.00715746 | 7.31907862 | 1.71581268 | 31.2207227 | cg23917399 | 0.01312522 | 9.17752513 | 1.59215091 | 52.9013719 |
| cg22027897 | 0.00715963 | 11.9781156 | 1.96094713 | 73.166304  | cg01058070 | 0.01312659 | 13.5948971 | 1.72891637 | 106.900039 |
| cg10392164 | 0.00716439 | 3202.8568  | 8.92305768 | 1149638.62 | cg00225623 | 0.01313109 | 3.99868097 | 1.33737839 | 11.9558156 |
| cg25239996 | 0.00716856 | 7.08595037 | 1.70034695 | 29.5296749 | cg00506935 | 0.01313185 | 116.428588 | 2.71237775 | 4997.68745 |
| cg21126828 | 0.00716976 | 2393.09343 | 8.24068609 | 694953.807 | cg16598405 | 0.01313424 | 983.695188 | 4.24308958 | 228054.63  |
| cg21903286 | 0.00717533 | 8.04169763 | 1.7593682  | 36.7568885 | cg03317402 | 0.01313459 | 44999.7863 | 9.45992014 | 214058971  |
| cg23907982 | 0.00717697 | 9.01592843 | 1.81466268 | 44.794532  | cg27539986 | 0.01314272 | 7.14387013 | 1.51018404 | 33.7938152 |
| cg07042077 | 0.00718454 | 0.0141471  | 0.00063431 | 0.31552249 | cg09667013 | 0.01314864 | 15.8421371 | 1.78436366 | 140.651435 |
| cg01883662 | 0.00719068 | 0.14681385 | 0.0362398  | 0.59476894 | cg24496666 | 0.01314957 | 11.2161289 | 1.65974275 | 75.795811  |
| cg22301984 | 0.00719279 | 2009.37404 | 7.84205127 | 514863.252 | cg21704448 | 0.01315565 | 17.0129999 | 1.81092132 | 159.831443 |
| cg18153578 | 0.0071957  | 3793204.27 | 60.4332426 | 2.3809E+11 | cg24668061 | 0.01316309 | 13.7953615 | 1.73279824 | 109.829288 |
| cg08352268 | 0.00720023 | 9.85617629 | 1.85776731 | 52.290839  | cg01211283 | 0.01317539 | 8.71652666 | 1.57355012 | 48.2843449 |
| cg01294023 | 0.00720376 | 221830995  | 181.489524 | 2.7114E+14 | cg01313358 | 0.01318565 | 47.9947382 | 2.24824739 | 1024.57359 |

|            |            |            |            |            |            |            |            |            |            |
|------------|------------|------------|------------|------------|------------|------------|------------|------------|------------|
| cg16792202 | 0.0072079  | 7835.47548 | 11.3168684 | 5425058.77 | cg15306012 | 0.01319006 | 22.4618562 | 1.91770684 | 263.092863 |
| cg21693907 | 0.00720843 | 19.7512024 | 2.24169383 | 174.024654 | cg02221303 | 0.01319085 | 15171.5053 | 7.49597149 | 30706436.5 |
| cg17519645 | 0.00721522 | 8.77146542 | 1.79931239 | 42.7600043 | cg22076118 | 0.01319515 | 5050.13863 | 5.95295143 | 4284244.64 |
| cg27645955 | 0.00721542 | 8.17627137 | 1.76542509 | 37.8670349 | cg21128569 | 0.01319789 | 10.3385585 | 1.63005202 | 65.572013  |
| cg26960176 | 0.00721649 | 1055817442 | 275.923996 | 4.0401E+15 | cg08516222 | 0.01320867 | 32.3254865 | 2.06833712 | 505.206365 |
| cg10508349 | 0.00721714 | 7.68354061 | 1.7359142  | 34.0090519 | cg19355621 | 0.01321014 | 4960.29837 | 5.92412046 | 4153284.88 |
| cg21290280 | 0.00722836 | 44580853   | 116.916837 | 1.6999E+13 | cg05421149 | 0.01321793 | 0.09085243 | 0.01362652 | 0.60574269 |
| cg13686012 | 0.00722937 | 41.113796  | 2.73090319 | 618.968927 | cg06305609 | 0.01322039 | 14.211815  | 1.74134107 | 115.988585 |
| cg23423766 | 0.00722947 | 7488.44979 | 11.1519943 | 5028417.22 | cg20750843 | 0.01323342 | 3150411.52 | 22.767599  | 4.3593E+11 |
| cg13316191 | 0.00723214 | 31.7451664 | 2.54620586 | 395.787163 | cg16472904 | 0.01323545 | 31.4285859 | 2.05456976 | 480.760513 |
| cg02811627 | 0.00723417 | 110.473972 | 3.56637872 | 3422.09825 | cg13430464 | 0.01324032 | 18.5873103 | 1.84088459 | 187.675049 |
| cg06798642 | 0.00723807 | 1007.32368 | 6.47907851 | 156611.931 | cg12019109 | 0.01324347 | 10.2946022 | 1.62710907 | 65.1332089 |
| cg07583667 | 0.00724073 | 5.8205E+10 | 810.096026 | 4.182E+18  | cg15331996 | 0.01324838 | 32.3006778 | 2.06554871 | 505.112166 |
| cg11153969 | 0.00724344 | 26.2537183 | 2.41766837 | 285.091923 | cg17518962 | 0.01325068 | 19.4435425 | 1.8577861  | 203.495625 |
| cg15379858 | 0.00724655 | 12.5120393 | 1.97880147 | 79.1141147 | cg05323898 | 0.01325076 | 2639562.62 | 21.8932551 | 3.1824E+11 |
| cg04748051 | 0.00724715 | 1300507252 | 289.579784 | 5.8406E+15 | cg19761115 | 0.01325251 | 8.29389064 | 1.5550721  | 44.235005  |
| cg23032421 | 0.00725584 | 11.3496545 | 1.92682083 | 66.8534691 | cg21779231 | 0.01325964 | 672.161705 | 3.88989606 | 116147.411 |
| cg02283931 | 0.00725867 | 15.4277428 | 2.09312462 | 113.71289  | cg24034966 | 0.01326262 | 15389.1602 | 7.47366236 | 31688112.1 |
| cg10440696 | 0.00726223 | 0.13916317 | 0.03297808 | 0.58725037 | cg17399362 | 0.01327275 | 7.27899542 | 1.51275854 | 35.0246077 |
| cg13277380 | 0.00726932 | 10.1354305 | 1.86811604 | 54.9895981 | cg00528640 | 0.01328639 | 339102.149 | 14.2102997 | 8092036715 |
| cg08315174 | 0.00726984 | 51.6559037 | 2.89891598 | 920.458686 | cg23359394 | 0.01329009 | 13.0868941 | 1.70895208 | 100.217437 |
| cg02727530 | 0.00727188 | 14.0185801 | 2.03880447 | 96.3901099 | cg14182820 | 0.01331657 | 0.06958411 | 0.00843254 | 0.57419811 |
| cg25464921 | 0.00727224 | 3.96289433 | 1.4499011  | 10.8314501 | cg17188046 | 0.01332183 | 8.38789272 | 1.55676132 | 45.1943041 |
| cg19220754 | 0.00727693 | 16801.0864 | 13.7946348 | 20462774.8 | cg01994599 | 0.01332349 | 74565588.7 | 43.4757535 | 1.2789E+14 |
| cg21762534 | 0.00728068 | 1064.14158 | 6.55145574 | 172846.669 | cg11983038 | 0.01333339 | 10.4644731 | 1.62970343 | 67.1933281 |
| cg00393417 | 0.00728206 | 28444.28   | 15.8891643 | 50920051.7 | cg18507365 | 0.01333617 | 141.374953 | 2.80059986 | 7136.64159 |
| cg15994744 | 0.00728896 | 21.3770959 | 2.28312756 | 200.155365 | cg23615572 | 0.01334372 | 2362971.48 | 21.1440858 | 2.6408E+11 |
| cg12688670 | 0.00728979 | 3544.96498 | 9.05471689 | 1387870.75 | cg02208899 | 0.01334587 | 131366906  | 48.7383391 | 3.5408E+14 |
| cg24727216 | 0.00729316 | 14.8558993 | 2.06948059 | 106.644027 | cg21817720 | 0.01336064 | 2067.29446 | 4.8850385  | 874856.23  |
| cg27351691 | 0.00729617 | 10435569.7 | 77.8814111 | 1.3983E+12 | cg21083314 | 0.01336362 | 61675.3069 | 9.88912827 | 384649018  |

|            |            |            |            |            |            |            |            |            |            |
|------------|------------|------------|------------|------------|------------|------------|------------|------------|------------|
| cg21084516 | 0.00729956 | 15.6417322 | 2.09797204 | 116.619184 | cg15458254 | 0.01336645 | 9.81272688 | 1.60702571 | 59.9179019 |
| cg20001829 | 0.00730102 | 15.8372264 | 2.10489929 | 119.159022 | cg20474425 | 0.01336936 | 7.46724955 | 1.51830312 | 36.7250882 |
| cg12749863 | 0.00731064 | 3.43632918 | 1.3943651  | 8.46862723 | cg10334703 | 0.01338882 | 15.422873  | 1.76436396 | 134.816295 |
| cg24566687 | 0.00731232 | 75.8056733 | 3.20764342 | 1791.50216 | cg13934277 | 0.0133935  | 1814650.88 | 19.8920883 | 1.6554E+11 |
| cg13883681 | 0.00731268 | 41.4733465 | 2.72673411 | 630.805351 | cg26887625 | 0.01339728 | 61886034.6 | 41.3503994 | 9.262E+13  |
| cg23338737 | 0.00731365 | 443896184  | 213.053406 | 9.2486E+14 | cg25490585 | 0.01340567 | 796922466  | 70.1602162 | 9.0519E+15 |
| cg23265500 | 0.00731781 | 8.76583905 | 1.79399354 | 42.8317787 | cg16214500 | 0.0134119  | 609138.408 | 15.8270876 | 2.3444E+10 |
| cg16300531 | 0.00731976 | 8.01489052 | 1.75116593 | 36.683257  | cg04453677 | 0.01341746 | 353867.147 | 14.1329014 | 8860314962 |
| cg22983529 | 0.00732958 | 11.9019266 | 1.94725311 | 72.7465047 | cg24568647 | 0.01342346 | 1.2557E+11 | 199.590996 | 7.8996E+19 |
| cg24201890 | 0.00733817 | 18.0046713 | 2.17600254 | 148.974177 | cg27217148 | 0.01342626 | 35.8569266 | 2.09958784 | 612.367418 |
| cg22638491 | 0.00734047 | 9.67900259 | 1.84132113 | 50.8781925 | cg10638827 | 0.0134263  | 36.9630828 | 2.11284519 | 646.649125 |
| cg09461851 | 0.0073438  | 0.14421195 | 0.03500629 | 0.59409567 | cg16903217 | 0.01344492 | 118.311419 | 2.68680568 | 5209.75219 |
| cg18711066 | 0.00734502 | 24.534411  | 2.36422059 | 254.60286  | cg06726056 | 0.01344586 | 4281381443 | 98.6772793 | 1.8576E+17 |
| cg20587543 | 0.00735234 | 1735.53574 | 7.42567797 | 405630.883 | cg08499107 | 0.01345335 | 1730963.4  | 19.5540868 | 1.5323E+11 |
| cg22761315 | 0.00736546 | 23589.3095 | 14.9500263 | 37221039.7 | cg05964918 | 0.01345531 | 1694.19759 | 4.65903709 | 616072.68  |
| cg20275528 | 0.0073656  | 5.01636738 | 1.54221281 | 16.3167765 | cg03008269 | 0.01346465 | 633204.165 | 15.8591041 | 2.5282E+10 |
| cg16496928 | 0.00736697 | 10676.6633 | 12.080439  | 9436009.57 | cg03945021 | 0.01346596 | 15.754632  | 1.76895954 | 140.313232 |
| cg03988279 | 0.00737593 | 2.2134E+10 | 599.306824 | 8.1746E+17 | cg01803049 | 0.01346875 | 0.00948973 | 0.00023601 | 0.38157991 |
| cg04468551 | 0.00738178 | 30.0431192 | 2.49268579 | 362.094981 | cg04579966 | 0.01346968 | 3.55069993 | 1.29966256 | 9.70057183 |
| cg18813989 | 0.00738258 | 4457152.62 | 60.9150313 | 3.2613E+11 | cg20384898 | 0.0134885  | 5.61861171 | 1.42869042 | 22.0963179 |
| cg06553210 | 0.00738452 | 3960.37599 | 9.23867837 | 1697707.98 | cg15888699 | 0.01348856 | 164174.569 | 11.9654825 | 2252586915 |
| cg23187101 | 0.00738507 | 112607728  | 144.855654 | 8.7539E+13 | cg18202751 | 0.01349013 | 45381.3807 | 9.17167603 | 224546714  |
| cg15639045 | 0.00738939 | 20.0380905 | 2.23527763 | 179.630962 | cg22345692 | 0.01350396 | 14.1022918 | 1.72739375 | 115.12988  |
| cg15799267 | 0.00739598 | 20.8456321 | 2.25854221 | 192.398607 | cg16036409 | 0.01351154 | 9.31465295 | 1.5853442  | 54.7280265 |
| cg21714061 | 0.00740147 | 15.0796196 | 2.07026228 | 109.838705 | cg16411251 | 0.01351758 | 13.940063  | 1.72274428 | 112.799886 |
| cg05852040 | 0.00741148 | 68.1241982 | 3.10052441 | 1496.81337 | cg05302420 | 0.01352203 | 4.1637E+11 | 250.19229  | 6.93E+20   |
| cg13661243 | 0.00741575 | 10.3169861 | 1.86913084 | 56.9463623 | cg07478122 | 0.01353673 | 0.08127543 | 0.01108583 | 0.59586864 |
| cg26980034 | 0.0074179  | 42.9274723 | 2.73868443 | 672.866088 | cg26341831 | 0.01353781 | 26.4823053 | 1.96566174 | 356.781882 |
| cg25148255 | 0.00742216 | 7.8811E+10 | 830.814409 | 7.476E+18  | cg10999157 | 0.01353931 | 3203.08842 | 5.28492086 | 1941330    |
| cg27494647 | 0.00742463 | 6.17592861 | 1.62864903 | 23.4194683 | cg22137448 | 0.01354865 | 31552.4978 | 8.46423796 | 117619580  |



|            |            |            |            |            |            |            |            |            |            |
|------------|------------|------------|------------|------------|------------|------------|------------|------------|------------|
| cg17071957 | 0.00743011 | 16.4803238 | 2.11806968 | 128.23047  | cg15372603 | 0.01355104 | 7.46726808 | 1.51358345 | 36.8397875 |
| cg10565216 | 0.0074323  | 119.249437 | 3.598171   | 3952.12684 | cg02334620 | 0.01355898 | 2.3476E+10 | 137.167519 | 4.0177E+18 |
| cg08738571 | 0.00744189 | 28.9085264 | 2.46090464 | 339.591744 | cg22817039 | 0.01356197 | 215558108  | 52.1470886 | 8.9104E+14 |
| cg15628498 | 0.00744273 | 282021949  | 182.779173 | 4.3515E+14 | cg05508558 | 0.01356224 | 69.6267042 | 2.39729552 | 2022.22792 |
| cg16601494 | 0.00744577 | 3.413      | 1.38895158 | 8.38659111 | cg00478851 | 0.01356287 | 331.639917 | 3.30669344 | 33261.3338 |
| cg12317815 | 0.00744632 | 89.6970812 | 3.33137116 | 2415.09156 | cg08962271 | 0.01356537 | 58.5028507 | 2.31257996 | 1479.98495 |
| cg08331344 | 0.00745357 | 1.15E-11   | 1.12E-19   | 0.0011845  | cg14925616 | 0.01357229 | 53.3253359 | 2.26831829 | 1253.61218 |
| cg19635869 | 0.00745551 | 111.754769 | 3.53139885 | 3536.59524 | cg04460557 | 0.01357402 | 21.1418454 | 1.87467465 | 238.42944  |
| cg23239444 | 0.00745814 | 20.9136473 | 2.25525213 | 193.938689 | cg20773694 | 0.01358042 | 600300.726 | 15.4809203 | 2.3278E+10 |
| cg16898498 | 0.00746152 | 10.0951612 | 1.85585268 | 54.9139921 | cg25074426 | 0.013591   | 6.77828373 | 1.48271407 | 30.9871818 |
| cg27476456 | 0.00746315 | 10.099235  | 1.85596697 | 54.9549362 | cg14579819 | 0.01359739 | 18.281551  | 1.81833386 | 183.802938 |
| cg03457528 | 0.0074659  | 226.354788 | 4.26232113 | 12020.7953 | cg01303055 | 0.01360814 | 17.4156059 | 1.79980027 | 168.520548 |
| cg07830449 | 0.00746895 | 17.7796564 | 2.15858677 | 146.4459   | cg05542338 | 0.01360824 | 5.7495146  | 1.43295648 | 23.0690315 |
| cg20265748 | 0.00747902 | 10.5302156 | 1.87596274 | 59.1085514 | cg08693600 | 0.01360831 | 506377764  | 61.6936711 | 4.1563E+15 |
| cg12118857 | 0.00748574 | 1.63E-06   | 9.30E-11   | 0.02841097 | cg02605237 | 0.01360876 | 941545.123 | 16.9282189 | 5.2369E+10 |
| cg11449134 | 0.00749456 | 27.4106192 | 2.42090805 | 310.355465 | cg09161542 | 0.0136152  | 102.921469 | 2.59294053 | 4085.25713 |
| cg03317826 | 0.00749543 | 3735118616 | 359.801183 | 3.8775E+16 | cg17934743 | 0.01362292 | 7.0373E+11 | 272.381733 | 1.82E+21   |
| cg15916004 | 0.00749547 | 9.31397438 | 1.81461591 | 47.8063255 | cg23709172 | 0.01362431 | 14.0986752 | 1.72264031 | 115.388362 |
| cg03086376 | 0.00749778 | 860951.741 | 38.4262337 | 1.929E+10  | cg20320141 | 0.01363919 | 1865.73971 | 4.69740134 | 741044.765 |
| cg10030624 | 0.00749944 | 39.4755036 | 2.66798824 | 584.078806 | cg14732852 | 0.01364016 | 16632.1651 | 7.36173624 | 37576586.2 |
| cg00528600 | 0.00750005 | 102445285  | 137.582566 | 7.6282E+13 | cg07068756 | 0.01364514 | 4.25136512 | 1.34608618 | 13.4271533 |
| cg18625286 | 0.00750202 | 1.0352E+17 | 34841.2174 | 3.08E+29   | cg11340260 | 0.01364632 | 30.0973781 | 2.01192522 | 450.24147  |
| cg04060561 | 0.0075029  | 10.9533317 | 1.8944867  | 63.3287501 | cg24740531 | 0.01365119 | 5.45279791 | 1.41655187 | 20.9897044 |
| cg18014543 | 0.00750382 | 80.6619962 | 3.22801765 | 2015.58924 | cg23275064 | 0.01365288 | 0.11632341 | 0.02104482 | 0.64296755 |
| cg01348757 | 0.00750484 | 60.3408598 | 2.98721024 | 1218.86947 | cg03744763 | 0.01366213 | 18.7699564 | 1.82529079 | 193.016512 |
| cg03640883 | 0.00750808 | 0.10051951 | 0.018654   | 0.54166243 | cg27332337 | 0.0136773  | 23.0705409 | 1.9034588  | 279.622472 |
| cg03847535 | 0.00750848 | 17.6919812 | 2.15273384 | 145.399395 | cg08734623 | 0.0136779  | 165.492291 | 2.85120172 | 9605.66841 |
| cg12394377 | 0.00750975 | 48.7719962 | 2.82156872 | 843.044365 | cg22934035 | 0.01368267 | 18.5221837 | 1.81939864 | 188.563012 |
| cg05590982 | 0.00753121 | 7.77972821 | 1.7279099  | 35.0273883 | cg04491089 | 0.01368431 | 14.5293784 | 1.73097673 | 121.955906 |
| cg02006107 | 0.00753358 | 10.9344557 | 1.89191472 | 63.1964639 | cg24925865 | 0.01370406 | 30669360.2 | 34.1762006 | 2.7522E+13 |

|            |            |            |            |            |            |            |            |            |            |
|------------|------------|------------|------------|------------|------------|------------|------------|------------|------------|
| cg04528060 | 0.00753385 | 3.98827051 | 1.44591597 | 11.0008479 | cg24521811 | 0.01371176 | 39.9982158 | 2.12857797 | 751.608485 |
| cg13783444 | 0.00753745 | 1099.54904 | 6.46430261 | 187028.386 | cg01850934 | 0.01373135 | 28046.8239 | 8.13146425 | 96738337.4 |
| cg03905819 | 0.00753923 | 8.25033492 | 1.75481452 | 38.7892998 | cg23239444 | 0.01374261 | 28.9532366 | 1.99052663 | 421.139761 |
| cg11155735 | 0.00754402 | 9.30174184 | 1.8115767  | 47.7608268 | cg24277128 | 0.01374595 | 90162435   | 42.3502217 | 1.9195E+14 |
| cg27352765 | 0.0075454  | 135.748198 | 3.69992767 | 4980.52256 | cg14653418 | 0.01374669 | 6735.41424 | 6.06599896 | 7478703.07 |
| cg11779239 | 0.00754693 | 10.0230754 | 1.84783559 | 54.3674133 | cg20140110 | 0.01375065 | 7.66348794 | 1.51647812 | 38.7272634 |
| cg24930197 | 0.00754823 | 229397.194 | 26.7890813 | 1964347781 | cg26861214 | 0.01375109 | 0.00544296 | 8.60E-05   | 0.34439843 |
| cg25217365 | 0.00755334 | 4.95985524 | 1.53184983 | 16.0591224 | cg17279839 | 0.01376481 | 12.8205033 | 1.68421747 | 97.5914977 |
| cg12901910 | 0.00755723 | 11.0861885 | 1.89755867 | 64.7693152 | cg05774290 | 0.01377419 | 178.435925 | 2.8834227  | 11042.217  |
| cg09857708 | 0.00755728 | 35594.707  | 16.2891763 | 77780677.6 | cg05951609 | 0.01377502 | 6.8759127  | 1.48263708 | 31.8878949 |
| cg14182820 | 0.00755776 | 0.08261142 | 0.01325666 | 0.51480915 | cg02786012 | 0.01377663 | 8.58481468 | 1.55136204 | 47.5060245 |
| cg25924823 | 0.00756223 | 0.00011749 | 1.54E-07   | 0.0899077  | cg27117639 | 0.01378481 | 3.05E-12   | 2.09E-21   | 0.00445501 |
| cg26379822 | 0.00756234 | 26.0004342 | 2.38056568 | 283.975604 | cg18532308 | 0.01379103 | 19.7582541 | 1.83864541 | 212.324032 |
| cg13654253 | 0.00756336 | 3.4568E+12 | 2176.45327 | 5.49E+21   | cg10105971 | 0.01379786 | 10.6250892 | 1.61973458 | 69.6981607 |
| cg20303021 | 0.00757027 | 2593794943 | 320.008353 | 2.1024E+16 | cg24516766 | 0.01380627 | 7.039E+11  | 261.148018 | 1.90E+21   |
| cg03739476 | 0.00757369 | 45.6564567 | 2.76403985 | 754.154119 | cg01122672 | 0.01381696 | 693.420763 | 3.79583135 | 126673.793 |
| cg14430111 | 0.00757554 | 239030.899 | 26.9727908 | 2118274348 | cg04001842 | 0.01381746 | 140.149844 | 2.73969435 | 7169.40519 |
| cg02300764 | 0.00758083 | 411.823472 | 4.95986284 | 34194.2061 | cg09857708 | 0.01382864 | 37889.5678 | 8.5734564  | 167449309  |
| cg20034091 | 0.00759713 | 10.3815157 | 1.86254547 | 57.8648256 | cg21289924 | 0.01382899 | 6618.92412 | 6.00772579 | 7292302.94 |
| cg02764250 | 0.00760003 | 0.02576279 | 0.00175495 | 0.37820011 | cg03517998 | 0.01382949 | 0.133331   | 0.02680435 | 0.66321895 |
| cg17300750 | 0.00760054 | 11.9666868 | 1.93403679 | 74.0428478 | cg15590133 | 0.01382985 | 0.02745942 | 0.00156884 | 0.48062104 |
| cg00679711 | 0.00760067 | 0.0374447  | 0.00335653 | 0.4177244  | cg05291965 | 0.01384631 | 197.459477 | 2.93430506 | 13287.7272 |
| cg16714002 | 0.00760146 | 67.3534335 | 3.06093785 | 1482.0572  | cg00106250 | 0.01384981 | 7060166.39 | 24.8114978 | 2.009E+12  |
| cg04282419 | 0.00760618 | 58.6988824 | 2.95040029 | 1167.82757 | cg13556548 | 0.01385069 | 6.9473277  | 1.48394121 | 32.5251174 |
| cg14714537 | 0.00760676 | 12.5225976 | 1.95714159 | 80.1247348 | cg03463411 | 0.01387052 | 20.5365677 | 1.84947239 | 228.03834  |
| cg08409816 | 0.00761155 | 25.7637689 | 2.3701619  | 280.053353 | cg23585979 | 0.0138754  | 15.9459852 | 1.75647967 | 144.76367  |
| cg07229893 | 0.00761192 | 0.01345296 | 0.00056837 | 0.31842267 | cg18894815 | 0.01387637 | 6.82498522 | 1.47797147 | 31.5164562 |
| cg03928367 | 0.00761852 | 5.66889573 | 1.5851591  | 20.2732829 | cg09039561 | 0.01387865 | 10.4711075 | 1.61234869 | 68.0027171 |
| cg24881993 | 0.00762293 | 163.772049 | 3.87095519 | 6928.85419 | cg17470143 | 0.01387911 | 16.9598922 | 1.7784878  | 161.73175  |
| cg16784205 | 0.00762359 | 69310.5103 | 19.2777668 | 249196232  | cg21646955 | 0.01387991 | 7.37259248 | 1.5012687  | 36.2061234 |

|            |            |            |            |            |            |            |            |            |            |
|------------|------------|------------|------------|------------|------------|------------|------------|------------|------------|
| cg08539350 | 0.00762956 | 423.527319 | 4.97910724 | 36025.6129 | cg16464045 | 0.01388133 | 41.8921806 | 2.13743822 | 821.055214 |
| cg20967975 | 0.00763512 | 11.6510872 | 1.91837068 | 70.7620455 | cg01022087 | 0.0138853  | 0.02706057 | 0.00152559 | 0.47999435 |
| cg16039972 | 0.00763759 | 6.66E-05   | 5.68E-08   | 0.07797113 | cg19025234 | 0.01388752 | 12.7983915 | 1.67921022 | 97.5451571 |
| cg24364084 | 0.00763846 | 209303.479 | 25.7937333 | 1698394947 | cg06116236 | 0.01389179 | 0.08419048 | 0.01172199 | 0.60467861 |
| cg19378640 | 0.00763907 | 6.62710952 | 1.65149652 | 26.593202  | cg20532887 | 0.01390374 | 39330.2545 | 8.58161507 | 180253822  |
| cg18229767 | 0.00764616 | 11.9846218 | 1.93214874 | 74.3375277 | cg08993385 | 0.01390946 | 21.112092  | 1.8580546  | 239.885539 |
| cg16570157 | 0.0076469  | 3.80149709 | 1.42492846 | 10.1418286 | cg25746764 | 0.01391102 | 1432.6475  | 4.37603603 | 469026.959 |
| cg01243246 | 0.00765151 | 171.424261 | 3.91119313 | 7513.37925 | cg06440553 | 0.01391815 | 799.111739 | 3.88517009 | 164363.35  |
| cg13939859 | 0.00765353 | 5.89010177 | 1.60014855 | 21.6812988 | cg09262011 | 0.01391977 | 261.799352 | 3.09717285 | 22129.5046 |
| cg13048591 | 0.00766024 | 45.8220625 | 2.75560923 | 761.95906  | cg06033764 | 0.01393275 | 0.04455438 | 0.00373229 | 0.53186998 |
| cg17679455 | 0.00766136 | 125782.983 | 22.4611318 | 704388320  | cg18798248 | 0.01393352 | 5.17924299 | 1.3962037  | 19.212496  |
| cg04460557 | 0.00767027 | 15.4115169 | 2.06375699 | 115.088575 | cg18785300 | 0.01393797 | 37319.0554 | 8.46505089 | 164524929  |
| cg13982823 | 0.00767169 | 17510.9377 | 13.3037391 | 23048628.4 | cg22248683 | 0.01395158 | 1482849.86 | 17.8399502 | 1.2325E+11 |
| cg16412592 | 0.00767377 | 1053393.19 | 39.3659877 | 2.8188E+10 | cg05997131 | 0.01395222 | 17790.4398 | 7.27516893 | 43504109.7 |
| cg21856334 | 0.00767584 | 0.10201158 | 0.01904757 | 0.54633546 | cg11580511 | 0.01395638 | 464250.897 | 14.0894688 | 1.5297E+10 |
| cg02532824 | 0.00768023 | 12.1902379 | 1.93888653 | 76.642907  | cg26345046 | 0.01396202 | 14.0189813 | 1.7077913  | 115.079541 |
| cg26827247 | 0.00768482 | 5.10723261 | 1.53983067 | 16.9394112 | cg02176069 | 0.01396547 | 17.6794636 | 1.78986823 | 174.629299 |
| cg15239874 | 0.00768571 | 1068483402 | 245.484319 | 4.6506E+15 | cg07903860 | 0.01396719 | 3382412761 | 85.3345059 | 1.3407E+17 |
| cg20359237 | 0.00768604 | 125.655751 | 3.59476702 | 4392.32022 | cg23980468 | 0.01397072 | 8.82836913 | 1.55473902 | 50.1306654 |
| cg00237391 | 0.00768894 | 7.87787889 | 1.72685343 | 35.9387629 | cg00262061 | 0.01397356 | 101839.834 | 10.3419505 | 1002842918 |
| cg18632254 | 0.00769552 | 11393396.7 | 73.6455359 | 1.7626E+12 | cg11420031 | 0.01397668 | 9765.01004 | 6.42987671 | 14830054.3 |
| cg08315133 | 0.00769604 | 1246.69716 | 6.59325412 | 235733.946 | cg19427757 | 0.01398444 | 1.3708E+10 | 112.934618 | 1.6638E+18 |
| cg26702921 | 0.00769699 | 0.07985211 | 0.01244519 | 0.51235531 | cg15130433 | 0.01398753 | 5970745.05 | 23.5522376 | 1.5136E+12 |
| cg00002719 | 0.0076994  | 4.85361149 | 1.51878562 | 15.5107766 | cg14633020 | 0.01398837 | 25572.9875 | 7.80676133 | 83770677.7 |
| cg08801795 | 0.00770179 | 15.8406546 | 2.07664278 | 120.832693 | cg01645998 | 0.0139965  | 7.38013484 | 1.49866172 | 36.3433518 |
| cg11983038 | 0.00770266 | 9.09126983 | 1.79293129 | 46.0983573 | cg03615240 | 0.014      | 34634920.7 | 33.5615772 | 3.5743E+13 |
| cg01758899 | 0.00770454 | 13.8763314 | 2.00500085 | 96.0361545 | cg12487497 | 0.01400484 | 1164738830 | 68.3049386 | 1.9861E+16 |
| cg01056889 | 0.00770664 | 6.49199748 | 1.6399906  | 25.6989469 | cg26631984 | 0.01401194 | 7.32176793 | 1.49587225 | 35.8374759 |
| cg23574802 | 0.00771173 | 22.1454412 | 2.26825117 | 216.210874 | cg20256260 | 0.01402369 | 19.5335471 | 1.82378201 | 209.213306 |
| cg09689449 | 0.00771912 | 109.895849 | 3.4629853  | 3487.48162 | cg20698170 | 0.01402635 | 201393.959 | 11.8104374 | 3434210370 |

|            |            |            |            |            |            |            |            |            |            |
|------------|------------|------------|------------|------------|------------|------------|------------|------------|------------|
| cg06949933 | 0.00772005 | 11.3395843 | 1.89988927 | 67.6808772 | cg04665974 | 0.01405869 | 478150.541 | 14.0169563 | 1.6311E+10 |
| cg24680586 | 0.00772138 | 3.87347707 | 1.43029185 | 10.4900441 | cg12419678 | 0.01405956 | 862.849288 | 3.91487681 | 190174.284 |
| cg13567541 | 0.00772639 | 6.96722284 | 1.67014787 | 29.0646085 | cg25390230 | 0.0140685  | 7.6715E+10 | 157.28028  | 3.7419E+19 |
| cg21440584 | 0.00772708 | 6.26521573 | 1.62390812 | 24.1718899 | cg27144788 | 0.01407666 | 414143.485 | 13.5898554 | 1.2621E+10 |
| cg01024168 | 0.00773577 | 7.21323255 | 1.68515583 | 30.8759124 | cg13002957 | 0.01408475 | 22.855396  | 1.8796358  | 277.909754 |
| cg23022999 | 0.00773787 | 23.5259355 | 2.30252085 | 240.375517 | cg19844955 | 0.01408537 | 0.08302324 | 0.01138581 | 0.60539028 |
| cg25262261 | 0.00773878 | 0.09088213 | 0.01555947 | 0.53083823 | cg18014543 | 0.01410365 | 151.489271 | 2.75033806 | 8344.06485 |
| cg12451530 | 0.00773901 | 7.21381732 | 1.68506252 | 30.8826288 | cg11724135 | 0.01410447 | 6.43206348 | 1.45509604 | 28.4321031 |
| cg26616378 | 0.00774223 | 148670.802 | 23.2076706 | 952400948  | cg05280555 | 0.01411559 | 406.404519 | 3.3534657  | 49251.9226 |
| cg19510057 | 0.00774493 | 4.1695E+11 | 1168.67423 | 1.49E+20   | cg09298971 | 0.01411755 | 18.0143155 | 1.79013143 | 181.2803   |
| cg01918706 | 0.00774805 | 699.357766 | 5.63497425 | 86797.4302 | cg09668408 | 0.01413546 | 7.4173E+11 | 244.871487 | 2.25E+21   |
| cg10245865 | 0.0077506  | 28628617.9 | 92.914214  | 8.821E+12  | cg13753515 | 0.01413913 | 25.6871012 | 1.9216243  | 343.369495 |
| cg05516012 | 0.00775311 | 1.6389E+11 | 911.030716 | 2.9483E+19 | cg06734406 | 0.01414726 | 4.83037287 | 1.37273679 | 16.9970691 |
| cg20439288 | 0.00775498 | 555581399  | 203.025886 | 1.5204E+15 | cg11188483 | 0.01415958 | 106.239513 | 2.55502103 | 4417.51124 |
| cg11529190 | 0.00775651 | 43814.4023 | 16.7779253 | 114418309  | cg12120360 | 0.01416006 | 0.08322004 | 0.01141681 | 0.60661206 |
| cg12507643 | 0.00776518 | 11.6794868 | 1.9122283  | 71.3358396 | cg09704415 | 0.01416985 | 72.6609954 | 2.36627573 | 2231.19402 |
| cg02067430 | 0.0077769  | 9018939522 | 421.052507 | 1.9319E+17 | cg22545356 | 0.01417144 | 1167.53762 | 4.13417147 | 329726.064 |
| cg19915711 | 0.00777775 | 9.78880482 | 1.82457601 | 52.5166937 | cg00213177 | 0.0141737  | 18.9090429 | 1.80522518 | 198.064988 |
| cg16857771 | 0.00777866 | 10.201428  | 1.84449623 | 56.4214398 | cg17167832 | 0.01418259 | 94.7925041 | 2.49496077 | 3601.50707 |
| cg05399707 | 0.0077789  | 178297941  | 149.601417 | 2.125E+14  | cg26847756 | 0.01418777 | 3476.88159 | 5.14218431 | 2350889.21 |
| cg13801056 | 0.00777903 | 15.6854259 | 2.06595716 | 119.088909 | cg13425174 | 0.01418818 | 64.7117909 | 2.3103543  | 1812.54273 |
| cg00809888 | 0.00778773 | 188.770355 | 3.97811368 | 8957.57384 | cg08382220 | 0.01419305 | 31.0544889 | 1.99335995 | 483.79686  |
| cg14277108 | 0.00778868 | 1773.47582 | 7.17767531 | 438194.311 | cg22409775 | 0.0141941  | 6.3077E+10 | 147.327291 | 2.70E+19   |
| cg22517351 | 0.00779739 | 1065680001 | 238.567754 | 4.7604E+15 | cg27614280 | 0.01419969 | 2.91E-05   | 6.89E-09   | 0.12288222 |
| cg23801544 | 0.00779751 | 18.5564691 | 2.15815483 | 159.554143 | cg21961890 | 0.01420547 | 808742959  | 61.3166861 | 1.0667E+16 |
| cg11555919 | 0.00779877 | 14.1751011 | 2.01029243 | 99.9523696 | cg10799705 | 0.0142175  | 296523.501 | 12.5188483 | 7023504437 |
| cg19848291 | 0.00779891 | 261.280998 | 4.3306323  | 15763.9244 | cg08500417 | 0.01422309 | 51.3619441 | 2.20310356 | 1197.4241  |
| cg00429081 | 0.00780214 | 19258.3128 | 13.4338154 | 27608136.6 | cg03079712 | 0.01422443 | 303.455268 | 3.14562557 | 29274.0181 |
| cg14210494 | 0.00780841 | 3407585.47 | 52.4317423 | 2.2146E+11 | cg11612345 | 0.01422494 | 11.3271729 | 1.62692249 | 78.8635264 |
| cg20183756 | 0.00781397 | 0.06447682 | 0.00855342 | 0.48603517 | cg16053142 | 0.01422758 | 74131.9495 | 9.47113143 | 580241756  |

|            |            |            |            |            |            |            |            |            |            |
|------------|------------|------------|------------|------------|------------|------------|------------|------------|------------|
| cg10126234 | 0.00781933 | 5.4616821  | 1.56313654 | 19.0834074 | cg01348086 | 0.01424431 | 20.8637304 | 1.83800525 | 236.830251 |
| cg14779329 | 0.00783424 | 21.8206381 | 2.24920672 | 211.692523 | cg06460983 | 0.01424945 | 15.6581515 | 1.73508826 | 141.305612 |
| cg26982447 | 0.00784168 | 21.5247323 | 2.24053748 | 206.787035 | cg06804210 | 0.01426298 | 13.4229591 | 1.68188567 | 107.127277 |
| cg03383158 | 0.00784241 | 474.218884 | 5.05052715 | 44526.748  | cg27487704 | 0.01426508 | 566192.486 | 14.1791493 | 2.2609E+10 |
| cg18270343 | 0.00784541 | 8.99183883 | 1.78102141 | 45.3970767 | cg11073923 | 0.01426735 | 6211.27662 | 5.74463533 | 6715823.55 |
| cg04822330 | 0.00784931 | 6.78803877 | 1.65402402 | 27.8578    | cg09541379 | 0.01427323 | 77.7099651 | 2.38954915 | 2527.18747 |
| cg08430407 | 0.00785438 | 34.9336899 | 2.54329203 | 479.83585  | cg00969988 | 0.01427849 | 50124.3304 | 8.71675487 | 288232092  |
| cg24394414 | 0.00785747 | 6411257.57 | 61.3580931 | 6.6991E+11 | cg02372786 | 0.01428107 | 12.1647249 | 1.64845497 | 89.7692285 |
| cg23845770 | 0.00785977 | 0.11232632 | 0.02240434 | 0.56315896 | cg02556718 | 0.01428461 | 251655.027 | 12.0305512 | 5264118953 |
| cg00758533 | 0.00786579 | 38.6086828 | 2.60971036 | 571.18614  | cg14367396 | 0.01430176 | 333922.405 | 12.7079872 | 8774337817 |
| cg26305756 | 0.00787403 | 0.11770589 | 0.0242925  | 0.57032737 | cg04117530 | 0.0143075  | 6.3117919  | 1.44510136 | 27.5681126 |
| cg20344434 | 0.00787467 | 668067468  | 207.047767 | 2.1556E+15 | cg27298243 | 0.01430819 | 7.64197812 | 1.50137832 | 38.8974777 |
| cg03361102 | 0.00787551 | 13.4818288 | 1.97920527 | 91.8346924 | cg25985355 | 0.01431754 | 9.20637099 | 1.55804048 | 54.3999131 |
| cg23588217 | 0.00787594 | 10.3323402 | 1.84569864 | 57.8411081 | cg02304134 | 0.01432109 | 1223.39264 | 4.13673757 | 361804.328 |
| cg26928858 | 0.00787961 | 138.83182  | 3.64896596 | 5282.11952 | cg10622825 | 0.01433033 | 83470.6954 | 9.60660433 | 725267405  |
| cg01267709 | 0.00788    | 8.8111854  | 1.76996242 | 43.8636366 | cg22817638 | 0.01433549 | 23.3222871 | 1.87505302 | 290.087304 |
| cg20690916 | 0.00788114 | 357.159616 | 4.67521593 | 27284.9411 | cg04466743 | 0.01436277 | 20.6489894 | 1.82879711 | 233.148204 |
| cg00727590 | 0.00788267 | 17.1555593 | 2.10790869 | 139.623323 | cg05890484 | 0.01437064 | 13.3729421 | 1.67677681 | 106.654373 |
| cg01659099 | 0.00788449 | 5.67779291 | 1.57705279 | 20.4415049 | cg16642791 | 0.01438869 | 8.13054522 | 1.51798308 | 43.5484206 |
| cg02879798 | 0.00788544 | 58.2848118 | 2.90498331 | 1169.41095 | cg13901143 | 0.01440046 | 2388.53847 | 4.70425606 | 1212756.27 |
| cg09615786 | 0.0078946  | 1427.91084 | 6.7174398  | 303527.749 | cg08633134 | 0.01440787 | 13202776.5 | 26.1271102 | 6.6717E+12 |
| cg07036561 | 0.00789555 | 1299.2171  | 6.55258687 | 257602.853 | cg04220104 | 0.01443041 | 0.11251754 | 0.01954713 | 0.64767531 |
| cg12743398 | 0.00789923 | 10.6333579 | 1.85844625 | 60.8402316 | cg02373393 | 0.01443357 | 3660034.19 | 20.1755747 | 6.6396E+11 |
| cg26444282 | 0.00790135 | 162.89976  | 3.80029601 | 6982.7013  | cg26875073 | 0.01443493 | 9.63824243 | 1.56894819 | 59.2089133 |
| cg15689224 | 0.00790299 | 507.49481  | 5.11835293 | 50319.1136 | cg02359414 | 0.01444339 | 6.2558E+11 | 220.883311 | 1.77E+21   |
| cg00463577 | 0.0079039  | 55.37732   | 2.8637302  | 1070.85771 | cg20065569 | 0.0144442  | 327522.389 | 12.4725374 | 8600568725 |
| cg13866214 | 0.00790449 | 13.719189  | 1.98650188 | 94.7475306 | cg02641288 | 0.0144698  | 22.9190101 | 1.86210924 | 282.089262 |
| cg25830305 | 0.00790502 | 7.94118671 | 1.72127593 | 36.6370349 | cg24272907 | 0.01447458 | 0.12152897 | 0.02243981 | 0.65817359 |
| cg04361056 | 0.0079151  | 36147.2526 | 15.6343426 | 83573956.2 | cg02819828 | 0.01449195 | 7.90309791 | 1.50679622 | 41.4514953 |
| cg20918957 | 0.00791739 | 6.40982865 | 1.62685097 | 25.254866  | cg13065262 | 0.0144972  | 1592.55419 | 4.31433838 | 587860.435 |

|            |            |            |            |            |            |            |            |            |            |
|------------|------------|------------|------------|------------|------------|------------|------------|------------|------------|
| cg10929210 | 0.00791919 | 13.5727264 | 1.98002231 | 93.0388013 | cg22525895 | 0.01449757 | 12.869985  | 1.65960522 | 99.8047689 |
| cg04220104 | 0.00792772 | 0.12711562 | 0.02772918 | 0.58272112 | cg17208816 | 0.01450416 | 563.88805  | 3.51036938 | 90580.1353 |
| cg06659904 | 0.00793084 | 29537656.9 | 90.2866765 | 9.6634E+12 | cg26379859 | 0.01451052 | 5.51235439 | 1.40253097 | 21.6651551 |
| cg16937168 | 0.00793112 | 6.60075316 | 1.63890444 | 26.5847974 | cg09254001 | 0.01451307 | 1139322.49 | 15.853811  | 8.1877E+10 |
| cg05123019 | 0.00793458 | 1262.16464 | 6.48164162 | 245780.262 | cg18233786 | 0.01451531 | 88.1587902 | 2.42896741 | 3199.70216 |
| cg02927346 | 0.00793498 | 10.9236353 | 1.86972115 | 63.8201099 | cg11176186 | 0.01451549 | 6436262.25 | 22.3360506 | 1.8546E+12 |
| cg25170017 | 0.0079359  | 17.9569929 | 2.12942847 | 151.427295 | cg09470142 | 0.01451669 | 132217.146 | 10.342831  | 1690192343 |
| cg15894039 | 0.00793733 | 5.0022E+13 | 3847.40518 | 6.50E+23   | cg20439288 | 0.01453295 | 706536511  | 56.4983144 | 8.8356E+15 |
| cg13682722 | 0.00793825 | 265.995147 | 4.31102249 | 16412.2127 | cg04427651 | 0.01453668 | 23.8259766 | 1.87326666 | 303.041299 |
| cg19812495 | 0.00793856 | 113927.266 | 21.0514521 | 616557087  | cg14528930 | 0.01454213 | 13020049.6 | 25.5909239 | 6.6243E+12 |
| cg07048306 | 0.00793867 | 218.057414 | 4.09245107 | 11618.7182 | cg14200826 | 0.01454795 | 4.0613E+12 | 312.493831 | 5.28E+22   |
| cg21184629 | 0.00793978 | 5402.31425 | 9.47839197 | 3079108.7  | cg16523137 | 0.01455619 | 795.816285 | 3.747842   | 168983.527 |
| cg22752008 | 0.0079404  | 106.928258 | 3.39589506 | 3366.90388 | cg07816439 | 0.01455692 | 73.4146289 | 2.3390582  | 2304.22131 |
| cg26360644 | 0.00794296 | 1.64E-05   | 4.79E-09   | 0.05595486 | cg26211724 | 0.01455949 | 11.6045837 | 1.62388532 | 82.9284934 |
| cg15087448 | 0.00795119 | 22.546278  | 2.25885204 | 225.041145 | cg14244577 | 0.0145792  | 31.334724  | 1.9753045  | 497.070162 |
| cg25886621 | 0.00796204 | 7.47151736 | 1.69169642 | 32.9985753 | cg24377657 | 0.01457926 | 0.00054376 | 1.31E-06   | 0.22639996 |
| cg12014818 | 0.00796493 | 10.0856679 | 1.82957221 | 55.5980777 | cg24828620 | 0.01458234 | 6.4757275  | 1.44644005 | 28.991901  |
| cg12639429 | 0.00796558 | 10.8744522 | 1.86590468 | 63.3760726 | cg27200466 | 0.01458607 | 14.3832507 | 1.693335   | 122.171867 |
| cg11352083 | 0.00796913 | 12.4697627 | 1.93367049 | 80.4144154 | cg07537523 | 0.01458659 | 56.0866942 | 2.21560496 | 1419.8006  |
| cg23447841 | 0.00796922 | 0.11073471 | 0.02179342 | 0.56265493 | cg03033975 | 0.01459712 | 2660.91994 | 4.74604399 | 1491873.01 |
| cg13141289 | 0.007973   | 7415.90932 | 10.261716  | 5359309.41 | cg27557378 | 0.01459769 | 9.30086115 | 1.55327077 | 55.6928126 |
| cg15489301 | 0.00798041 | 41.5177272 | 2.64655315 | 651.308164 | cg01119072 | 0.01459814 | 113.688934 | 2.54636152 | 5075.93825 |
| cg23845806 | 0.0079817  | 16973.8415 | 12.7276672 | 22636614.5 | cg16425829 | 0.01461083 | 0.11670637 | 0.02081151 | 0.65446374 |
| cg26436829 | 0.00798174 | 379536855  | 174.082832 | 8.2747E+14 | cg25446086 | 0.01461677 | 37.6032252 | 2.04552144 | 691.267528 |
| cg19716887 | 0.00798394 | 44.3809218 | 2.69263278 | 731.501984 | cg02555579 | 0.01461938 | 148.833357 | 2.68314633 | 8255.74362 |
| cg06804210 | 0.00798949 | 10.7812514 | 1.86046506 | 62.4765194 | cg14761923 | 0.01462142 | 13324.4517 | 6.51132247 | 27266505.9 |
| cg24631870 | 0.00799321 | 340371188  | 168.752207 | 6.8652E+14 | cg10981962 | 0.01463247 | 0.04277249 | 0.00340593 | 0.53714653 |
| cg03296761 | 0.00799442 | 21.5522455 | 2.22887983 | 208.400327 | cg11930554 | 0.01463305 | 4.55329231 | 1.34835947 | 15.376071  |
| cg00398048 | 0.00800623 | 19.7791103 | 2.17858122 | 179.572467 | cg26072749 | 0.01464598 | 8.14963416 | 1.51202365 | 43.9255942 |
| cg13804854 | 0.00800729 | 22009.9851 | 13.5804265 | 35671887.2 | cg01059295 | 0.01464827 | 0.10700418 | 0.01778525 | 0.64378588 |

|            |            |            |            |            |            |            |            |            |            |
|------------|------------|------------|------------|------------|------------|------------|------------|------------|------------|
| cg20132549 | 0.00802131 | 78384.1636 | 18.8804501 | 325420055  | cg04722722 | 0.01464941 | 40.1127081 | 2.06973692 | 777.407668 |
| cg13308525 | 0.00802159 | 656790.342 | 32.861513  | 1.3127E+10 | cg15929437 | 0.01465102 | 1722725.43 | 16.9324618 | 1.7527E+11 |
| cg25507767 | 0.00802172 | 16.8119686 | 2.08705878 | 135.426128 | cg19809499 | 0.01465208 | 4.03372435 | 1.31624561 | 12.3616231 |
| cg08810582 | 0.00802348 | 43.2077753 | 2.66918348 | 699.431818 | cg13979592 | 0.01466025 | 1.0722E+11 | 148.754124 | 7.7287E+19 |
| cg15372603 | 0.00803275 | 6.39344307 | 1.62166534 | 25.2062576 | cg20377955 | 0.01466051 | 9.67982754 | 1.56375745 | 59.9191782 |
| cg05361096 | 0.00803288 | 6.04868171 | 1.59840454 | 22.8894185 | cg04896048 | 0.0146631  | 0.11921392 | 0.02160502 | 0.65780835 |
| cg04822518 | 0.00804295 | 12.9590148 | 1.94887905 | 86.1705941 | cg27102995 | 0.01466356 | 566.54757  | 3.48489335 | 92105.0135 |
| cg23633635 | 0.00804538 | 1335552107 | 238.037362 | 7.4934E+15 | cg07633851 | 0.01467733 | 19.0900006 | 1.78683222 | 203.952066 |
| cg09778958 | 0.00804551 | 4871.76728 | 9.12848716 | 2600005.45 | cg04337534 | 0.01468616 | 50.5305908 | 2.16354411 | 1180.16573 |
| cg26931202 | 0.00804774 | 11.5672002 | 1.89178972 | 70.7267401 | cg27079322 | 0.01468676 | 16.6588164 | 1.73918743 | 159.566564 |
| cg21083314 | 0.00804795 | 43209.7063 | 16.1112816 | 115886418  | cg23609985 | 0.01470794 | 8.62632688 | 1.52740445 | 48.7189332 |
| cg11992317 | 0.00804913 | 5425222.6  | 56.7002961 | 5.191E+11  | cg16480966 | 0.01471153 | 3401861388 | 74.7068276 | 1.5491E+17 |
| cg27109877 | 0.00805345 | 14.8937508 | 2.02013775 | 109.806281 | cg16542392 | 0.01471312 | 299361599  | 46.3233034 | 1.9346E+15 |
| cg17444839 | 0.00805419 | 6.65482045 | 1.63790583 | 27.0385723 | cg05663031 | 0.01471791 | 12.3602215 | 1.63896656 | 93.2142723 |
| cg26081613 | 0.00805578 | 31372223.8 | 89.4237331 | 1.1006E+13 | cg14621323 | 0.01473155 | 19.7479844 | 1.7964365  | 217.086931 |
| cg22540912 | 0.00806331 | 1384.12716 | 6.56771192 | 291700.979 | cg00980538 | 0.01473281 | 577331527  | 52.5363473 | 6.3444E+15 |
| cg16201038 | 0.00806797 | 4.91488184 | 1.5132534  | 15.9629997 | cg09925572 | 0.01473316 | 1.2627E+10 | 96.2814338 | 1.6561E+18 |
| cg13843603 | 0.00806809 | 2.218E+10  | 491.702733 | 1.0005E+18 | cg26058820 | 0.01473787 | 0.13517315 | 0.02706514 | 0.67510385 |
| cg24973864 | 0.00806873 | 0.18880947 | 0.05500456 | 0.64811023 | cg06328288 | 0.01474037 | 411.358065 | 3.25978068 | 51910.0744 |
| cg03512414 | 0.00807735 | 11.7712234 | 1.89879998 | 72.9732997 | cg00599564 | 0.0147411  | 9.89598897 | 1.56822818 | 62.4466511 |
| cg09913183 | 0.00807929 | 416882.397 | 28.934796  | 6006295424 | cg06632353 | 0.01474114 | 1602634    | 16.5200306 | 1.5547E+11 |
| cg26032238 | 0.00808027 | 8.69015372 | 1.75457779 | 43.0409939 | cg24371438 | 0.01474572 | 6500549.48 | 21.7336224 | 1.9443E+12 |
| cg01593886 | 0.0080863  | 29.5806061 | 2.41211584 | 362.757146 | cg12439423 | 0.01475186 | 32.4290127 | 1.97909138 | 531.375597 |
| cg15600915 | 0.00808896 | 13.7877304 | 1.97780441 | 96.1174465 | cg00169792 | 0.01475488 | 9.31110869 | 1.54920078 | 55.9622393 |
| cg05302420 | 0.00809361 | 2.5965E+11 | 925.282778 | 7.2864E+19 | cg23034373 | 0.0147561  | 18.0510256 | 1.76400516 | 184.715745 |
| cg06459662 | 0.00810104 | 47334.978  | 16.3885422 | 136717477  | cg00034416 | 0.01475796 | 502420.816 | 13.1324709 | 1.9222E+10 |
| cg00752778 | 0.00810367 | 505.120834 | 5.03753145 | 50649.2236 | cg21682062 | 0.01477059 | 7.7438E+13 | 528.569913 | 1.13E+25   |
| cg10912268 | 0.00810438 | 557.401281 | 5.167796   | 60121.6045 | cg21992932 | 0.0147715  | 198.409015 | 2.8212962  | 13953.2097 |
| cg22376864 | 0.00810611 | 12.3251597 | 1.92002413 | 79.1185687 | cg25815972 | 0.01477188 | 7.0099E+10 | 133.759412 | 3.6737E+19 |
| cg24868790 | 0.00811235 | 15.9327089 | 2.05200197 | 123.709049 | cg21188037 | 0.0147835  | 6.78568471 | 1.45531736 | 31.6395022 |

|            |            |            |            |            |            |            |            |            |            |
|------------|------------|------------|------------|------------|------------|------------|------------|------------|------------|
| cg15344234 | 0.00811524 | 745.779106 | 5.56909174 | 99870.2305 | cg01851874 | 0.01478403 | 13.4028248 | 1.66294811 | 108.02244  |
| cg02649547 | 0.00811883 | 79.3948593 | 3.11273938 | 2025.07917 | cg22697962 | 0.0147919  | 7.33490036 | 1.47748314 | 36.4137917 |
| cg05378295 | 0.00811937 | 232557.817 | 24.7169843 | 2188096152 | cg15068083 | 0.01481816 | 4712239421 | 78.1351852 | 2.8419E+17 |
| cg02791024 | 0.00812393 | 1.5678E+10 | 442.444164 | 5.5553E+17 | cg14923274 | 0.01483899 | 5353119.76 | 20.6784607 | 1.3858E+12 |
| cg27090024 | 0.00812483 | 124393.621 | 20.996047  | 736985062  | cg03949306 | 0.01484135 | 7427.47924 | 5.7110945  | 9659697.94 |
| cg16052317 | 0.00812596 | 7.28134355 | 1.67393621 | 31.672631  | cg13538257 | 0.01484447 | 451.189221 | 3.30247606 | 61642.1467 |
| cg05497345 | 0.0081348  | 4.94117976 | 1.51346937 | 16.1319799 | cg11555919 | 0.01485015 | 19.4050624 | 1.78519697 | 210.932717 |
| cg24684765 | 0.00813656 | 1293.48065 | 6.41356719 | 260867.649 | cg07569020 | 0.01485257 | 24.581079  | 1.86950258 | 323.203322 |
| cg19750232 | 0.00813832 | 647398.062 | 32.1461906 | 1.3038E+10 | cg04953552 | 0.01486445 | 10.8271555 | 1.59238196 | 73.6175745 |
| cg07846311 | 0.00813844 | 6.26001739 | 1.60912956 | 24.3534261 | cg13716638 | 0.01486595 | 30938.4303 | 7.53301518 | 127065517  |
| cg14960043 | 0.00814054 | 14.2290131 | 1.99088649 | 101.69581  | cg10276465 | 0.01489337 | 75.2324626 | 2.32293919 | 2436.53534 |
| cg16113047 | 0.00814737 | 743.386972 | 5.55070883 | 99559.2106 | cg12946524 | 0.01489705 | 47699.2486 | 8.17556085 | 278295075  |
| cg17536822 | 0.00815789 | 19.5616468 | 2.16089018 | 177.083514 | cg09042952 | 0.0149097  | 1437.36969 | 4.12615275 | 500716.225 |
| cg17306261 | 0.00815917 | 17.5593016 | 2.10117293 | 146.741406 | cg02002664 | 0.01491111 | 371755.43  | 12.1848068 | 1.1342E+10 |
| cg12142869 | 0.0081625  | 0.0178618  | 0.00090516 | 0.35247425 | cg00415978 | 0.01491113 | 10.7087487 | 1.58755353 | 72.2352335 |
| cg14453612 | 0.0081644  | 40181.5313 | 15.5833336 | 103607835  | cg13929970 | 0.01491973 | 17.2862974 | 1.74253506 | 171.483539 |
| cg25059792 | 0.00818406 | 423.137644 | 4.78392048 | 37426.5138 | cg24463605 | 0.01491974 | 17.7630415 | 1.75179716 | 180.115398 |
| cg18685956 | 0.00819337 | 5786.86677 | 9.40560545 | 3560411.62 | cg24441185 | 0.01492212 | 744365.333 | 13.9340536 | 3.9764E+10 |
| cg05081953 | 0.00819404 | 57.1613811 | 2.84818906 | 1147.19333 | cg20829550 | 0.01492512 | 8.53647625 | 1.51855625 | 47.9873083 |
| cg20786557 | 0.00819687 | 252558.999 | 24.9708513 | 2554420241 | cg21199629 | 0.01492785 | 121.910797 | 2.54891463 | 5830.81214 |
| cg24138862 | 0.00819886 | 154.352533 | 3.68174962 | 6471.02786 | cg15648905 | 0.01493087 | 5472980.53 | 20.5316537 | 1.4589E+12 |
| cg00145141 | 0.00820265 | 9.00975768 | 1.76560094 | 45.9762633 | cg02233421 | 0.01493302 | 369214.299 | 12.1411433 | 1.1228E+10 |
| cg00088688 | 0.00820337 | 14.1743021 | 1.98505844 | 101.21155  | cg13243329 | 0.01494117 | 1.1015E+10 | 90.1735369 | 1.3455E+18 |
| cg06001881 | 0.00820881 | 3.1343E+13 | 3084.55259 | 3.18E+23   | cg04858631 | 0.01494238 | 50.1400231 | 2.14285702 | 1173.21029 |
| cg11870261 | 0.00820998 | 11.9938877 | 1.90077967 | 75.6812296 | cg00701946 | 0.01495202 | 9.82585739 | 1.5599788  | 61.890247  |
| cg03079681 | 0.00821083 | 445301.013 | 28.8555256 | 6871924456 | cg16416718 | 0.01495579 | 1427211.49 | 15.757912  | 1.2926E+11 |
| cg01721544 | 0.00821192 | 9.83777027 | 1.80576182 | 53.5960629 | cg25168729 | 0.01495752 | 1187897052 | 58.2886057 | 2.4209E+16 |
| cg15225657 | 0.00821358 | 6.0988E+15 | 12026.2724 | 3.09E+27   | cg20844262 | 0.01496674 | 240018.957 | 11.1270502 | 5177391934 |
| cg26923779 | 0.00821553 | 9.1806E+12 | 2240.35887 | 3.76E+22   | cg05799276 | 0.0149695  | 4.7756E+12 | 292.151108 | 7.81E+22   |
| cg14528525 | 0.00821706 | 6761597526 | 347.096665 | 1.3172E+17 | cg03834567 | 0.01497131 | 69.1565075 | 2.27904853 | 2098.5172  |



|            |            |            |            |            |            |            |            |            |            |
|------------|------------|------------|------------|------------|------------|------------|------------|------------|------------|
| cg23734074 | 0.00822108 | 274834.143 | 25.4334673 | 2969858787 | cg01943874 | 0.01497745 | 4.9472449  | 1.36453311 | 17.936708  |
| cg07244253 | 0.00823089 | 298.214858 | 4.35627376 | 20414.7183 | cg24334259 | 0.01500191 | 42.5050813 | 2.07133269 | 872.231653 |
| cg25756470 | 0.00823246 | 45.5466574 | 2.68109212 | 773.75111  | cg02767164 | 0.01502132 | 14296.4739 | 6.40202969 | 31925682.2 |
| cg11892243 | 0.00823698 | 6574735.66 | 57.6002386 | 7.5047E+11 | cg02259384 | 0.01502212 | 10.3680206 | 1.57430231 | 68.2815808 |
| cg18394090 | 0.00824562 | 7570.75585 | 10.0284651 | 5715365.59 | cg09938049 | 0.01502847 | 20.8419154 | 1.80244933 | 240.997307 |
| cg19910323 | 0.00824749 | 433369.993 | 28.4966294 | 6590588244 | cg10565216 | 0.01503451 | 149.267211 | 2.64013646 | 8439.223   |
| cg24304712 | 0.00826173 | 6271.66689 | 9.53734094 | 4124189.94 | cg00656881 | 0.01503747 | 34.1219659 | 1.98283144 | 587.194924 |
| cg25835179 | 0.00826248 | 37.6210651 | 2.54873268 | 555.313057 | cg04769618 | 0.01504473 | 19.0704007 | 1.77097717 | 205.355658 |
| cg03599590 | 0.00826599 | 23.4768863 | 2.25657951 | 244.247626 | cg01040523 | 0.01504749 | 7.66821033 | 1.4841881  | 39.6185966 |
| cg22325530 | 0.00827093 | 6.27500369 | 1.60560028 | 24.5239565 | cg03969696 | 0.01505918 | 9.34653879 | 1.54191425 | 56.655412  |
| cg19281068 | 0.00827147 | 50135.9766 | 16.2833331 | 154367422  | cg10522115 | 0.01507374 | 20.8802731 | 1.80111349 | 242.064594 |
| cg18881978 | 0.00827451 | 0.13869533 | 0.03200945 | 0.60095981 | cg01466825 | 0.01507401 | 319.912938 | 3.05523659 | 33497.9911 |
| cg02083559 | 0.00827817 | 4.81956989 | 1.49979991 | 15.4875685 | cg05580277 | 0.01507425 | 0.06491846 | 0.00715638 | 0.58890219 |
| cg25552655 | 0.00827906 | 1.5759E+19 | 88640.0906 | 2.80E+33   | cg11282402 | 0.01508126 | 1.1981E+10 | 89.3097586 | 1.6073E+18 |
| cg16513905 | 0.0082896  | 17843.3978 | 12.4504323 | 25572352.6 | cg22334879 | 0.01508199 | 36.0858592 | 2.00191361 | 650.472244 |
| cg03726881 | 0.00829082 | 12.9293408 | 1.93342562 | 86.4620033 | cg00009167 | 0.01508223 | 30.735639  | 1.9406717  | 486.779658 |
| cg14444703 | 0.00829209 | 1313939.43 | 37.6682463 | 4.5833E+10 | cg25905648 | 0.01508805 | 123937313  | 36.8270475 | 4.171E+14  |
| cg02187348 | 0.00829372 | 26910560.2 | 81.9601968 | 8.8357E+12 | cg26942121 | 0.01509651 | 8.49372052 | 1.51263084 | 47.6939159 |
| cg11481534 | 0.00829526 | 32.7451748 | 2.45586664 | 436.606147 | cg20501434 | 0.01512627 | 13.3645622 | 1.65024282 | 108.23348  |
| cg18532308 | 0.00829792 | 14.7306237 | 1.99904785 | 108.547315 | cg20656621 | 0.01512731 | 572955360  | 49.2153125 | 6.6702E+15 |
| cg00358155 | 0.00830401 | 95745.4275 | 19.1564971 | 478541920  | cg10976626 | 0.01512785 | 0.17248885 | 0.04178104 | 0.71210293 |
| cg20265062 | 0.00830695 | 25.7180915 | 2.30673489 | 286.734394 | cg07685728 | 0.01512865 | 20.943765  | 1.79977579 | 243.719965 |
| cg10891888 | 0.00830755 | 1147542.97 | 36.2871337 | 3.629E+10  | cg15987431 | 0.01513179 | 10.8428538 | 1.58473471 | 74.187483  |
| cg11255208 | 0.00830882 | 32.8657885 | 2.45685688 | 439.65119  | cg24876960 | 0.01513902 | 4.54458979 | 1.33958129 | 15.4177253 |
| cg23814129 | 0.00831519 | 3695044282 | 289.6113   | 4.7144E+16 | cg00501919 | 0.0151397  | 43.4983553 | 2.07203611 | 913.163098 |
| cg01678172 | 0.00831573 | 132.736976 | 3.51760999 | 5008.82839 | cg15614730 | 0.01514276 | 0.13091716 | 0.02537956 | 0.67531921 |
| cg25958098 | 0.00832033 | 12.6201807 | 1.91975994 | 82.9629567 | cg25753915 | 0.01514362 | 5980540819 | 77.2027313 | 4.6329E+17 |
| cg23956317 | 0.0083259  | 0.02648215 | 0.00178442 | 0.3930144  | cg22670485 | 0.01516701 | 9.34E-08   | 1.98E-13   | 0.04406293 |
| cg26669421 | 0.00832675 | 268646.305 | 24.9027216 | 2898110438 | cg07826859 | 0.01516973 | 6.98241586 | 1.45472275 | 33.5143802 |
| cg10197666 | 0.00833502 | 78223.9573 | 18.1124938 | 337832414  | cg20001829 | 0.01518633 | 19.4895724 | 1.77251233 | 214.296637 |

|            |            |            |            |            |            |            |            |            |            |
|------------|------------|------------|------------|------------|------------|------------|------------|------------|------------|
| cg05557932 | 0.00833517 | 199.234289 | 3.90045966 | 10176.8267 | cg06312003 | 0.01518639 | 1468.53717 | 4.07723863 | 528936.765 |
| cg02251172 | 0.00833869 | 1.2148E+13 | 2307.86137 | 6.39E+22   | cg14640066 | 0.01518989 | 8.66207017 | 1.51595207 | 49.494612  |
| cg21197375 | 0.00834111 | 236517.037 | 24.0511712 | 2325887097 | cg20465207 | 0.01519449 | 10725.1038 | 5.97772301 | 19242753.6 |
| cg09171882 | 0.0083442  | 15.7567461 | 2.0310394  | 122.240389 | cg22312127 | 0.01519779 | 8.5852E+13 | 483.332184 | 1.52E+25   |
| cg23641145 | 0.00834761 | 95.1849009 | 3.22377225 | 2810.42352 | cg07493874 | 0.0152191  | 14.8532158 | 1.6809136  | 131.248874 |
| cg19280776 | 0.00835992 | 57.1703771 | 2.82638994 | 1156.4052  | cg09131151 | 0.01522363 | 0.08755591 | 0.01224943 | 0.62582808 |
| cg02378269 | 0.00836003 | 9.46841382 | 1.78115439 | 50.3330091 | cg09461851 | 0.01522604 | 0.13424203 | 0.02652089 | 0.67949913 |
| cg27523779 | 0.00836184 | 8.32555085 | 1.72320516 | 40.2243439 | cg14975318 | 0.01522921 | 1874521.13 | 16.1015493 | 2.1823E+11 |
| cg03048083 | 0.00836241 | 3.34625191 | 1.36360599 | 8.21161095 | cg07270285 | 0.01522938 | 0.07553766 | 0.00937908 | 0.60836845 |
| cg14528930 | 0.00836649 | 63587941.7 | 100.757934 | 4.013E+13  | cg20693580 | 0.01523148 | 9.39929311 | 1.53886428 | 57.4103329 |
| cg20187572 | 0.00836754 | 545.34275  | 5.0410817  | 58995.0199 | cg19297231 | 0.01523183 | 22862.7546 | 6.89573337 | 75801299.2 |
| cg00929411 | 0.00836864 | 94.679627  | 3.21584564 | 2787.51929 | cg08101193 | 0.01523684 | 0.0921535  | 0.01343331 | 0.63217993 |
| cg24293588 | 0.00837388 | 336714.181 | 26.2113617 | 4325469277 | cg20066737 | 0.01524098 | 0.03795907 | 0.0027029  | 0.53309073 |
| cg11844042 | 0.00837538 | 0.06014085 | 0.00744091 | 0.48608585 | cg24507955 | 0.01524309 | 32.6475536 | 1.95474222 | 545.270238 |
| cg26981201 | 0.00837805 | 117.685279 | 3.39876776 | 4074.95474 | cg10867327 | 0.0152469  | 2164.48082 | 4.37758964 | 1070218.45 |
| cg16908156 | 0.00838009 | 5240.76194 | 9.00043535 | 3051584.13 | cg05587419 | 0.0152488  | 94.5685977 | 2.39781406 | 3729.73861 |
| cg14560703 | 0.00838016 | 19.6414702 | 2.14674844 | 179.70776  | cg11786558 | 0.01526703 | 84778.6635 | 8.84498544 | 812598487  |
| cg25044834 | 0.00838866 | 3737808.02 | 48.4903808 | 2.8812E+11 | cg14684375 | 0.01526799 | 2.61E-05   | 5.19E-09   | 0.13174945 |
| cg00431235 | 0.00839078 | 1.996E+10  | 437.923025 | 9.0978E+17 | cg16260298 | 0.01526922 | 145.950137 | 2.60431997 | 8179.27239 |
| cg04195127 | 0.00839081 | 95.6984486 | 3.22097239 | 2843.30071 | cg20311863 | 0.01527139 | 6.76842952 | 1.44378834 | 31.7301621 |
| cg17191919 | 0.00839283 | 20.4907257 | 2.16924167 | 193.556045 | cg07307426 | 0.01527396 | 5417.66792 | 5.21243071 | 5630986.26 |
| cg07139165 | 0.00839548 | 0.21731649 | 0.06984692 | 0.67614229 | cg13048591 | 0.01527738 | 70.3010928 | 2.26276849 | 2184.15789 |
| cg26149678 | 0.00839669 | 14.0176087 | 1.96778822 | 99.8549298 | cg27438798 | 0.01528085 | 4.08701975 | 1.31033113 | 12.747717  |
| cg10060338 | 0.00839811 | 3370.92664 | 8.02359226 | 1416216.83 | cg08937573 | 0.01528269 | 42.9963786 | 2.05859509 | 898.034088 |
| cg03045231 | 0.0083987  | 0.09706343 | 0.01713095 | 0.54995839 | cg20601919 | 0.01528316 | 5.3568752  | 1.38015194 | 20.7919949 |
| cg02149965 | 0.00840229 | 22.0350295 | 2.20930008 | 219.772103 | cg02335251 | 0.0152838  | 7.57137016 | 1.47491841 | 38.8669948 |
| cg13707337 | 0.00840372 | 16.6746311 | 2.05686852 | 135.177976 | cg16016641 | 0.01528569 | 130.042425 | 2.54561143 | 6643.2104  |
| cg21534623 | 0.0084055  | 3.0633E+11 | 878.245337 | 1.07E+20   | cg06785999 | 0.01528921 | 6.54670869 | 1.43420212 | 29.8837897 |
| cg18815943 | 0.00840775 | 5.2448702  | 1.52908337 | 17.9902966 | cg05635953 | 0.01529594 | 34985769   | 28.016587  | 4.3689E+13 |
| cg04750166 | 0.00840836 | 1.0076E+14 | 3874.6142  | 2.62E+24   | cg19893178 | 0.01531404 | 9.94191278 | 1.55323677 | 63.6359065 |

|            |            |            |            |            |            |            |            |            |            |
|------------|------------|------------|------------|------------|------------|------------|------------|------------|------------|
| cg07352215 | 0.00840982 | 5138.17317 | 8.92899665 | 2956751.42 | cg07309576 | 0.01531601 | 0.13489395 | 0.02671601 | 0.68110378 |
| cg04677344 | 0.00841179 | 5612.23841 | 9.13142763 | 3449320.44 | cg26149131 | 0.01532159 | 0.00205631 | 1.38E-05   | 0.30550509 |
| cg02258703 | 0.00841207 | 12.6725828 | 1.91669754 | 83.7870088 | cg01763057 | 0.01532766 | 24756.1479 | 6.94858186 | 88200279.3 |
| cg07638098 | 0.00841596 | 4.3563E+10 | 531.209948 | 3.5725E+18 | cg22168087 | 0.01532897 | 205.279532 | 2.77368106 | 15192.6936 |
| cg19380361 | 0.00841995 | 32886.6832 | 14.3500407 | 75368004.5 | cg12111295 | 0.01533632 | 0.05272423 | 0.00488445 | 0.56912183 |
| cg14546261 | 0.00843401 | 251921951  | 141.352302 | 4.4898E+14 | cg25274503 | 0.01535439 | 671.240736 | 3.47597208 | 129622.481 |
| cg00886812 | 0.00843445 | 3041.18737 | 7.78873704 | 1187460.89 | cg09663494 | 0.01535535 | 3800.21096 | 4.84354099 | 2981620.97 |
| cg18098750 | 0.00843723 | 11.4509112 | 1.8662558  | 70.2601259 | cg22802813 | 0.0153573  | 8.19814129 | 1.49578079 | 44.9327342 |
| cg13240116 | 0.00843734 | 24.3906093 | 2.26468012 | 262.686909 | cg18346784 | 0.01535869 | 607974.356 | 12.7897912 | 2.8901E+10 |
| cg01047631 | 0.00843781 | 6.52037165 | 1.61576313 | 26.3127966 | cg18568145 | 0.0153591  | 167.351123 | 2.66396861 | 10513.0363 |
| cg10985987 | 0.00844003 | 2835.8507  | 7.64676247 | 1051693.34 | cg16656078 | 0.01537416 | 291.050892 | 2.95957698 | 28622.5437 |
| cg09275980 | 0.00844119 | 0.09841381 | 0.017529   | 0.5525289  | cg12210363 | 0.01537559 | 25731184.4 | 26.1308603 | 2.5338E+13 |
| cg09932441 | 0.00844221 | 7185.29468 | 9.69833162 | 5323437.23 | cg13038216 | 0.01540323 | 18.0229312 | 1.73734729 | 186.966678 |
| cg04200399 | 0.00844377 | 62389.8027 | 16.8568679 | 230914040  | cg23912429 | 0.01540486 | 30.4907343 | 1.92081453 | 484.005542 |
| cg19318511 | 0.00845019 | 2.18E-06   | 1.33E-10   | 0.0356229  | cg07418892 | 0.01540506 | 11.9884592 | 1.60712221 | 89.4288888 |
| cg06974755 | 0.00845048 | 12731.8343 | 11.2170355 | 14451198.3 | cg19116747 | 0.01542312 | 4355457280 | 69.1402353 | 2.7437E+17 |
| cg15811902 | 0.0084506  | 816.052608 | 5.55526873 | 119875.724 | cg22586726 | 0.01544504 | 5.883651   | 1.40205183 | 24.6904916 |
| cg13099839 | 0.0084513  | 36.9575976 | 2.51736163 | 542.577596 | cg13463731 | 0.01544631 | 14.6938157 | 1.6693576  | 129.336112 |
| cg20806502 | 0.00845625 | 6.1735E+13 | 3358.92701 | 1.13E+24   | cg25512791 | 0.01545191 | 55.9287767 | 2.15358705 | 1452.47348 |
| cg25495844 | 0.00847199 | 9183.66554 | 10.2949512 | 8192337.31 | cg00237825 | 0.01545234 | 0.1062587  | 0.01731154 | 0.65221864 |
| cg15821939 | 0.00847845 | 26.6367123 | 2.31276992 | 306.781249 | cg02803139 | 0.01546091 | 77.34173   | 2.29016198 | 2611.93018 |
| cg07114009 | 0.00848767 | 4.24368751 | 1.44640062 | 12.4508269 | cg06761203 | 0.01547655 | 33.8175809 | 1.95530155 | 584.886143 |
| cg05230647 | 0.00849193 | 1852.41778 | 6.8270011  | 502629.425 | cg04321497 | 0.01548899 | 22338609.2 | 25.0527086 | 1.9919E+13 |
| cg10519271 | 0.00849377 | 6239.22685 | 9.30657891 | 4182842.27 | cg01409498 | 0.01549007 | 11.9765802 | 1.60415336 | 89.4169328 |
| cg20320575 | 0.0084971  | 30.6134309 | 2.39472478 | 391.352759 | cg00590620 | 0.01549228 | 14.9239371 | 1.67267783 | 133.154092 |
| cg12386787 | 0.0084998  | 731342588  | 182.875582 | 2.9247E+15 | cg21165793 | 0.01549675 | 4881.1881  | 5.0334652  | 4733517.82 |
| cg07139985 | 0.00849994 | 1.9311E+10 | 421.655864 | 8.844E+17  | cg02009255 | 0.01550609 | 1396715.1  | 14.752464  | 1.3224E+11 |
| cg17928876 | 0.00851632 | 10.5147481 | 1.82211536 | 60.6766896 | cg20508523 | 0.0155121  | 12.1460315 | 1.60775488 | 91.7590635 |
| cg06994787 | 0.00851958 | 10.3847786 | 1.81618861 | 59.3790903 | cg12179011 | 0.01551434 | 9.30297958 | 1.52819755 | 56.6323567 |
| cg24243914 | 0.00852079 | 13.4323557 | 1.93928123 | 93.0386874 | cg18676229 | 0.01551479 | 5768.10848 | 5.18957569 | 6411135.97 |

|            |            |            |            |            |            |            |            |            |            |
|------------|------------|------------|------------|------------|------------|------------|------------|------------|------------|
| cg18953104 | 0.00852177 | 5.4166842  | 1.53839991 | 19.072068  | cg07182669 | 0.01551949 | 5.99485147 | 1.40559426 | 25.5680072 |
| cg23820816 | 0.00852342 | 44.2240718 | 2.62747551 | 744.352713 | cg24848890 | 0.01552458 | 10.2502289 | 1.55634424 | 67.5089671 |
| cg24678320 | 0.00853268 | 0.02997264 | 0.00219598 | 0.40909175 | cg04022379 | 0.01552465 | 6.47747789 | 1.42632965 | 29.4165657 |
| cg11993720 | 0.0085333  | 1600338706 | 221.546016 | 1.156E+16  | cg23295623 | 0.01553659 | 0.13887066 | 0.02806083 | 0.68725903 |
| cg06008480 | 0.00853338 | 106135.895 | 19.0858239 | 590219646  | cg03093398 | 0.01555991 | 4.1371E+13 | 383.968491 | 4.46E+24   |
| cg16452651 | 0.00854366 | 0.06233945 | 0.0078797  | 0.49319221 | cg26455579 | 0.01556887 | 6547019.99 | 19.639515  | 2.1825E+12 |
| cg10311104 | 0.00854567 | 715832.542 | 30.983877  | 1.6538E+10 | cg20375554 | 0.01556981 | 171.006053 | 2.65232951 | 11025.4288 |
| cg11349878 | 0.00854643 | 0.00083806 | 4.27E-06   | 0.16459946 | cg02251393 | 0.01557155 | 18.27702   | 1.73532378 | 192.499789 |
| cg03377767 | 0.00854658 | 20.4792065 | 2.1575405  | 194.387035 | cg02011054 | 0.01557418 | 700232.765 | 12.8442471 | 3.8175E+10 |
| cg04621020 | 0.00854869 | 16.236057  | 2.03353059 | 129.631464 | cg13255056 | 0.01558111 | 8731455.31 | 20.7104061 | 3.6812E+12 |
| cg06526137 | 0.00855072 | 236925.856 | 23.3630788 | 2402673973 | cg01920373 | 0.01558467 | 1251127.67 | 14.3224685 | 1.0929E+11 |
| cg19619653 | 0.00855103 | 36888.2135 | 14.5493663 | 93525742.9 | cg13875008 | 0.01558873 | 0.07320727 | 0.00879726 | 0.6092018  |
| cg19977011 | 0.0085521  | 6316824.53 | 53.8884169 | 7.4046E+11 | cg13098382 | 0.01559854 | 1214.86754 | 3.84128654 | 384221.045 |
| cg19782271 | 0.00855338 | 15.4126511 | 2.00646651 | 118.392115 | cg13672975 | 0.01560768 | 2492389723 | 60.2366986 | 1.0313E+17 |
| cg08816023 | 0.00855619 | 17.081558  | 2.0594954  | 141.675298 | cg27582235 | 0.01561342 | 25.1621046 | 1.84187355 | 343.743199 |
| cg27586487 | 0.00855951 | 5.84065836 | 1.5670657  | 21.7688959 | cg03404102 | 0.01561462 | 3248.75574 | 4.6236167  | 2282718.17 |
| cg10690887 | 0.00856832 | 3003.69495 | 7.6704561  | 1176225.15 | cg06623120 | 0.01561943 | 1769.04915 | 4.11976757 | 759638.699 |
| cg12738981 | 0.00856891 | 9.82671072 | 1.7885132  | 53.9913507 | cg27314482 | 0.01562653 | 29.8679914 | 1.90199331 | 469.032621 |
| cg23034373 | 0.00856892 | 14.6981741 | 1.98143255 | 109.030369 | cg17031739 | 0.01563364 | 112.868356 | 2.44552375 | 5209.21779 |
| cg01535453 | 0.00857155 | 34.9158552 | 2.46908341 | 493.75284  | cg19431272 | 0.01564414 | 18.4037489 | 1.73473101 | 195.245242 |
| cg07229186 | 0.00857619 | 4.6131273  | 1.47530482 | 14.4247773 | cg04337056 | 0.01564417 | 0.10810558 | 0.01780019 | 0.65655575 |
| cg19706516 | 0.00858102 | 8.47847893 | 1.72210503 | 41.7422885 | cg06933384 | 0.01564595 | 16.5400938 | 1.69998566 | 160.927653 |
| cg17188046 | 0.00858315 | 7.27685433 | 1.6563831  | 31.9688174 | cg10667044 | 0.01565294 | 1803.37579 | 4.1266815  | 788082.204 |
| cg23275064 | 0.00858946 | 0.13397238 | 0.02991829 | 0.59992063 | cg13460740 | 0.01565746 | 66.4674154 | 2.21065632 | 1998.46411 |
| cg10310081 | 0.00858999 | 33218755.8 | 81.6271597 | 1.3519E+13 | cg20034091 | 0.01566083 | 12.4869726 | 1.61150075 | 96.7573144 |
| cg22583967 | 0.00859196 | 392444.473 | 26.4082374 | 5831993326 | cg12526849 | 0.0156778  | 45.1734605 | 2.05378085 | 993.602376 |
| cg07315894 | 0.00859833 | 14.2536137 | 1.9642832  | 103.429843 | cg02016764 | 0.01569468 | 8.29304822 | 1.49071506 | 46.1353419 |
| cg11685223 | 0.00859888 | 12.1585711 | 1.8864889  | 78.3629592 | cg26508844 | 0.01569482 | 1624.18099 | 4.03607805 | 653595.856 |
| cg23284178 | 0.00860066 | 213581.09  | 22.5977308 | 2018648799 | cg20273422 | 0.01569518 | 0.11578196 | 0.02013738 | 0.66570036 |
| cg26622291 | 0.00860159 | 12.3774103 | 1.89491403 | 80.848145  | cg07135540 | 0.01570324 | 20.3734308 | 1.76595868 | 235.043258 |

|            |            |            |            |            |            |            |            |            |            |
|------------|------------|------------|------------|------------|------------|------------|------------|------------|------------|
| cg22426944 | 0.00860636 | 25615464.1 | 76.1692677 | 8.6144E+12 | cg00374492 | 0.01570662 | 47.2088163 | 2.06915543 | 1077.09276 |
| cg24820508 | 0.00860739 | 5328.81375 | 8.84160654 | 3211662.48 | cg19843939 | 0.01570927 | 6.99617642 | 1.44331059 | 33.9126484 |
| cg20876723 | 0.00860802 | 7.0627E+13 | 3291.67946 | 1.52E+24   | cg10626682 | 0.01571985 | 0.12433702 | 0.02290367 | 0.67498758 |
| cg10737521 | 0.00861598 | 43.6780201 | 2.60888103 | 731.259656 | cg09490603 | 0.01572017 | 6.14828088 | 1.4083476  | 26.8409288 |
| cg07916003 | 0.00861667 | 3.9647E+10 | 490.623804 | 3.2039E+18 | cg03746823 | 0.015721   | 11.9921148 | 1.59737036 | 90.0297279 |
| cg04466840 | 0.00862138 | 4.65752463 | 1.47774902 | 14.6794452 | cg02157015 | 0.01572614 | 14.1882421 | 1.64864998 | 122.10367  |
| cg20668838 | 0.00862447 | 1387147.29 | 36.2132757 | 5.3135E+10 | cg27508002 | 0.01573495 | 11.820239  | 1.59260176 | 87.7294339 |
| cg03853794 | 0.00862852 | 11.1481255 | 1.84387659 | 67.4018542 | cg16881309 | 0.01573573 | 4519.43315 | 4.88291078 | 4183012.33 |
| cg01051318 | 0.00863627 | 56948.6987 | 16.0809255 | 201677091  | cg27405799 | 0.01574472 | 36739.1557 | 7.24148022 | 186393599  |
| cg00708105 | 0.00863802 | 8.13514497 | 1.70181398 | 38.8882595 | cg08213047 | 0.01574717 | 3.3019E+14 | 542.35918  | 2.01E+26   |
| cg07709681 | 0.00864154 | 549.87599  | 4.95397584 | 61034.5335 | cg20587543 | 0.01575351 | 4505.84275 | 4.8744659  | 4165096.1  |
| cg25723933 | 0.00864449 | 524080.394 | 28.2031831 | 9738626284 | cg25789201 | 0.01575992 | 32997.2845 | 7.08772126 | 153620712  |
| cg17381426 | 0.00864596 | 10.2844123 | 1.80570607 | 58.5749462 | cg27423729 | 0.01576215 | 13341871.4 | 21.9303665 | 8.1169E+12 |
| cg16393012 | 0.00864706 | 4.78516256 | 1.4872551  | 15.3960009 | cg20331595 | 0.0157734  | 5151.81375 | 4.99238653 | 5316332.12 |
| cg26162295 | 0.00864851 | 16.9028536 | 2.04797692 | 139.50668  | cg22156128 | 0.01577714 | 31.7413306 | 1.91623091 | 525.778009 |
| cg20195987 | 0.00865874 | 1825375.77 | 38.6123528 | 8.6294E+10 | cg00898147 | 0.01577946 | 45.4882925 | 2.05027649 | 1009.2223  |
| cg22226091 | 0.0086664  | 49.3309833 | 2.6848404  | 906.402448 | cg19502671 | 0.01578226 | 0.00493852 | 6.62E-05   | 0.36835732 |
| cg17166812 | 0.00867046 | 83.3921221 | 3.0661404  | 2268.07814 | cg08589960 | 0.01578231 | 872.930511 | 3.57326159 | 213252.699 |
| cg19195724 | 0.00867171 | 0.05338582 | 0.00598629 | 0.4760954  | cg16353345 | 0.0157887  | 4.4329E+13 | 367.828312 | 5.34E+24   |
| cg05694648 | 0.00867528 | 203.181614 | 3.84085482 | 10748.3282 | cg15923947 | 0.015791   | 11.3054282 | 1.5776275  | 81.0157704 |
| cg14080475 | 0.00867574 | 5.60538211 | 1.54727051 | 20.3069266 | cg23105863 | 0.01581011 | 7.54051723 | 1.46153762 | 38.9038225 |
| cg22831315 | 0.00867613 | 276204.948 | 23.8691644 | 3196139237 | cg07594531 | 0.01581027 | 25.9883069 | 1.84394749 | 366.275125 |
| cg17411681 | 0.00867705 | 3252435513 | 256.21139  | 4.1288E+16 | cg15799267 | 0.01581152 | 19.8832071 | 1.75344459 | 225.465878 |
| cg13016775 | 0.00868329 | 19.3126898 | 2.11592504 | 176.27278  | cg15642759 | 0.01581918 | 10.278206  | 1.54883871 | 68.2069206 |
| cg09879099 | 0.00868778 | 44.1324454 | 2.60779985 | 746.864348 | cg15320854 | 0.01582151 | 16.1801056 | 1.68650169 | 155.230094 |
| cg03607638 | 0.00869397 | 1589.50998 | 6.4564168  | 391322.627 | cg19716433 | 0.01582505 | 102227.206 | 8.71787445 | 1198732742 |
| cg00496961 | 0.00869919 | 15.7538998 | 2.00861322 | 123.560552 | cg02299189 | 0.01584173 | 1581.51998 | 3.98222992 | 628091.675 |
| cg03771878 | 0.00870115 | 609.853603 | 5.06409239 | 73442.8576 | cg07336964 | 0.01584361 | 0.06763274 | 0.00758145 | 0.60333959 |
| cg25934944 | 0.00870631 | 4732.5274  | 8.49915061 | 2635182.81 | cg12395726 | 0.01584611 | 27002.8343 | 6.77882141 | 107563397  |
| cg19946641 | 0.0087071  | 0.10867914 | 0.02070275 | 0.57051154 | cg18488946 | 0.01585442 | 0.08452093 | 0.01135319 | 0.62923188 |

|            |            |            |            |            |            |            |            |            |            |
|------------|------------|------------|------------|------------|------------|------------|------------|------------|------------|
| cg22173752 | 0.00870833 | 9.22343132 | 1.75381998 | 48.5065094 | cg14328457 | 0.01585746 | 5.11452218 | 1.35794133 | 19.2632308 |
| cg01325552 | 0.00870924 | 7.10004551 | 1.6415091  | 30.7099401 | cg19559248 | 0.01587145 | 992.225702 | 3.64296945 | 270249.821 |
| cg14521552 | 0.00871475 | 0.14476374 | 0.03415837 | 0.61351118 | cg14226131 | 0.01587515 | 359.587311 | 3.01155868 | 42935.5851 |
| cg18262197 | 0.00871952 | 5.56992288 | 1.54349154 | 20.09991   | cg01051318 | 0.01587775 | 217484.412 | 9.99491506 | 4732353343 |
| cg02619315 | 0.00871957 | 1647.88316 | 6.50185065 | 417653.226 | cg18773260 | 0.01588299 | 27.9359162 | 1.86564506 | 418.308623 |
| cg20376123 | 0.00872438 | 127.234228 | 3.4025069  | 4757.82979 | cg20569452 | 0.01589955 | 8.58984318 | 1.49551823 | 49.3376842 |
| cg16752778 | 0.00872491 | 12034.4946 | 10.7407222 | 13484108.3 | cg08276690 | 0.01593396 | 1.2691E+10 | 77.2932493 | 2.0837E+18 |
| cg02251393 | 0.00872664 | 15.8755051 | 2.01082405 | 125.337501 | cg20460554 | 0.01594447 | 48.6407157 | 2.06599856 | 1145.16983 |
| cg05703053 | 0.00874125 | 6.06155871 | 1.57615673 | 23.311447  | cg00897404 | 0.01595506 | 97.7632029 | 2.35288296 | 4062.09914 |
| cg11314748 | 0.00874375 | 0.1186059  | 0.02409746 | 0.58376932 | cg02737621 | 0.01597661 | 69.5530844 | 2.20640967 | 2192.53551 |
| cg09076334 | 0.00874397 | 6.05877085 | 1.57588793 | 23.2939814 | cg14780632 | 0.01598044 | 4.95461015 | 1.34782733 | 18.2131354 |
| cg08970050 | 0.00874471 | 270.940436 | 4.11336659 | 17846.3841 | cg15645309 | 0.01598192 | 6.54148939 | 1.41948887 | 30.1454167 |
| cg09755939 | 0.00875047 | 27.7013811 | 2.31248044 | 331.836975 | cg03787837 | 0.01598278 | 7.8251386  | 1.46770708 | 41.7200371 |
| cg02291533 | 0.00875178 | 23115.787  | 12.6287085 | 42311500.6 | cg22940789 | 0.0159914  | 211.989836 | 2.71463442 | 16554.6013 |
| cg02953545 | 0.00875238 | 11.4891244 | 1.85177005 | 71.2831377 | cg17941202 | 0.01599594 | 823.666699 | 3.4954422  | 194088.986 |
| cg09162146 | 0.00875359 | 18.6405467 | 2.09224044 | 166.075549 | cg13976502 | 0.01599966 | 29.1335992 | 1.87466716 | 452.75589  |
| cg00256281 | 0.00875573 | 166.978313 | 3.63793845 | 7664.16398 | cg23764900 | 0.01600357 | 26.3824517 | 1.84014707 | 378.248981 |
| cg12699865 | 0.00875919 | 38.3063231 | 2.50873045 | 584.907155 | cg07924703 | 0.01600585 | 88.5736322 | 2.30586054 | 3402.32559 |
| cg02675260 | 0.00876255 | 4.39E-06   | 4.32E-10   | 0.04450861 | cg17814457 | 0.01600644 | 3600088226 | 60.3314826 | 2.1482E+17 |
| cg13119284 | 0.00876808 | 2.0328E+10 | 397.81544  | 1.0387E+18 | cg14038647 | 0.01600801 | 0.00042402 | 7.64E-07   | 0.23531623 |
| cg14656297 | 0.00877012 | 2007.52339 | 6.80534346 | 592203.787 | cg09534243 | 0.0160184  | 1290079.81 | 13.7396231 | 1.2113E+11 |
| cg19306970 | 0.00877157 | 12.2758703 | 1.88197893 | 80.0736864 | cg12789279 | 0.01601925 | 20.1343047 | 1.74913116 | 231.766626 |
| cg20091128 | 0.00877361 | 27800155   | 75.3212855 | 1.0261E+13 | cg13883681 | 0.0160237  | 45.3910214 | 2.03473785 | 1012.5849  |
| cg08048963 | 0.00877651 | 16648.1227 | 11.5937944 | 23905891.2 | cg13455434 | 0.01603608 | 7.65714571 | 1.46055757 | 40.1434914 |
| cg17035040 | 0.0087811  | 5772.56108 | 8.87292375 | 3755522.12 | cg09132215 | 0.01604246 | 11.550382  | 1.5764842  | 84.6258553 |
| cg05413277 | 0.00878189 | 10.7671039 | 1.82026794 | 63.6887153 | cg04400030 | 0.01604768 | 3658572.17 | 16.6264922 | 8.0505E+11 |
| cg25826098 | 0.00878451 | 224919770  | 127.304695 | 3.9738E+14 | cg03752087 | 0.0160513  | 0.12517125 | 0.02305959 | 0.67945013 |
| cg21679294 | 0.00878482 | 122265937  | 109.169596 | 1.3693E+14 | cg07723431 | 0.01605355 | 27657.5562 | 6.69874661 | 114191574  |
| cg22484599 | 0.00879263 | 44537516.1 | 84.5108752 | 2.3471E+13 | cg19901191 | 0.01605942 | 11736.9643 | 5.70933176 | 24128275.8 |
| cg02249390 | 0.00879351 | 42.5149604 | 2.57191166 | 702.793134 | cg09883798 | 0.01606083 | 0.14903709 | 0.03164285 | 0.70196137 |

|            |            |            |            |            |            |            |            |            |            |
|------------|------------|------------|------------|------------|------------|------------|------------|------------|------------|
| cg14181982 | 0.00879841 | 116813.898 | 18.893373  | 722236667  | cg03111114 | 0.0160647  | 41.5189607 | 1.9988867  | 862.392097 |
| cg21352006 | 0.00879982 | 16.871137  | 2.03728509 | 139.713025 | cg07187607 | 0.01606477 | 25.6993232 | 1.82837605 | 361.225041 |
| cg02379560 | 0.00880245 | 7.7643272  | 1.67549633 | 35.9802501 | cg11906444 | 0.01606845 | 17.2160105 | 1.69703489 | 174.652283 |
| cg13851466 | 0.00880597 | 5.49822538 | 1.53593207 | 19.6821741 | cg06439941 | 0.01607571 | 0.03639334 | 0.00245126 | 0.54032453 |
| cg16131859 | 0.00881089 | 51.8344369 | 2.70153353 | 994.549511 | cg02716556 | 0.01608291 | 567578.93  | 11.7141934 | 2.75E+10   |
| cg18229914 | 0.00881786 | 47696.561  | 15.0427237 | 151233379  | cg18934106 | 0.01608326 | 37.6706596 | 1.96205692 | 723.260667 |
| cg26266934 | 0.00882666 | 139.433773 | 3.46270038 | 5614.62872 | cg04436646 | 0.01608328 | 1007466074 | 47.0079272 | 2.1592E+16 |
| cg25206802 | 0.00882775 | 0.00019435 | 3.24E-07   | 0.11652985 | cg02994288 | 0.01608572 | 1162457.44 | 13.3785636 | 1.0101E+11 |
| cg17791651 | 0.00882973 | 23.6953908 | 2.2169174  | 253.266786 | cg22566736 | 0.0160887  | 87.8343795 | 2.29570595 | 3360.56899 |
| cg17007872 | 0.00883347 | 1.0477E+12 | 1053.84572 | 1.04E+21   | cg24406391 | 0.0160942  | 135.599812 | 2.48797493 | 7390.47202 |
| cg05598886 | 0.00883527 | 9.12481619 | 1.74362326 | 47.752443  | cg10316490 | 0.01609865 | 5.61737813 | 1.37759801 | 22.9057656 |
| cg21754388 | 0.00883578 | 14.668508  | 1.96465565 | 109.517985 | cg09767313 | 0.01609953 | 0.01755284 | 0.00065246 | 0.47221677 |
| cg27539234 | 0.0088363  | 71.7273535 | 2.92818965 | 1756.99455 | cg19574915 | 0.01610553 | 70.4451278 | 2.2023481  | 2253.28413 |
| cg09948076 | 0.00884175 | 12.459138  | 1.88532841 | 82.3358518 | cg05508408 | 0.01611157 | 10407252   | 20.0358125 | 5.4059E+12 |
| cg23609985 | 0.00885063 | 7.76505739 | 1.67370936 | 36.0254402 | cg16576694 | 0.01611849 | 0.15967476 | 0.03582946 | 0.71159406 |
| cg08216021 | 0.00885443 | 11596.0334 | 10.4985645 | 12808226.4 | cg18191162 | 0.01612209 | 57.6301819 | 2.12070959 | 1566.09744 |
| cg23095680 | 0.00885602 | 501.742568 | 4.76902884 | 52787.6037 | cg15496079 | 0.0161246  | 525669958  | 41.3936188 | 6.6756E+15 |
| cg15840079 | 0.00885605 | 461.915525 | 4.67095148 | 45679.3338 | cg13915028 | 0.01613201 | 16451.6022 | 6.04644606 | 44762694.1 |
| cg27410952 | 0.00885883 | 209.96386  | 3.83098307 | 11507.4439 | cg22235012 | 0.01614753 | 287786.274 | 10.2617793 | 8070816700 |
| cg18817318 | 0.00885957 | 109.304119 | 3.25145611 | 3674.47382 | cg15353612 | 0.01615383 | 66.7745282 | 2.17719678 | 2047.9718  |
| cg20009641 | 0.00886433 | 10.8191473 | 1.81853264 | 64.367252  | cg27090024 | 0.01615857 | 295088.911 | 10.2985439 | 8455318217 |
| cg01249180 | 0.00886539 | 223444.837 | 22.0442879 | 2264876742 | cg05922057 | 0.01615893 | 584.678853 | 3.25307689 | 105084.931 |
| cg01899600 | 0.00886791 | 0.12315247 | 0.02566085 | 0.59103773 | cg18261462 | 0.01615956 | 6.7471232  | 1.42399075 | 31.969078  |
| cg18948488 | 0.00887157 | 14.7846243 | 1.96646325 | 111.156471 | cg09371439 | 0.01617285 | 16.2330332 | 1.67485133 | 157.334184 |
| cg02273078 | 0.00887161 | 35609066.1 | 78.6771016 | 1.6117E+13 | cg18714412 | 0.01617479 | 101.851143 | 2.35250542 | 4409.62017 |
| cg18793200 | 0.00887678 | 3838.64303 | 7.93628933 | 1856683.86 | cg10864791 | 0.01617619 | 1107674162 | 47.1384763 | 2.6028E+16 |
| cg02461665 | 0.00888211 | 18.9487673 | 2.09215533 | 171.62004  | cg25355924 | 0.01618869 | 105932328  | 30.4792217 | 3.6817E+14 |
| cg19209269 | 0.00888303 | 0.02066401 | 0.00113029 | 0.37778079 | cg02637304 | 0.01619605 | 36.056764  | 1.94014145 | 670.100745 |
| cg02308209 | 0.00889068 | 1.7823E+11 | 664.108814 | 4.7831E+19 | cg18120358 | 0.01620408 | 0.15459091 | 0.03374506 | 0.70820297 |
| cg01780984 | 0.00889586 | 31.5861655 | 2.37713761 | 419.700504 | cg25143652 | 0.01620502 | 57.39712   | 2.11367226 | 1558.62829 |

|            |            |            |            |            |            |            |            |            |            |
|------------|------------|------------|------------|------------|------------|------------|------------|------------|------------|
| cg22864519 | 0.00889588 | 7.40204624 | 1.65204549 | 33.165121  | cg13994177 | 0.01620827 | 0.0923249  | 0.01323787 | 0.64390187 |
| cg18607468 | 0.00889656 | 125.544145 | 3.35996533 | 4690.92113 | cg22800400 | 0.01620907 | 16.8795429 | 1.68567809 | 169.023356 |
| cg22920498 | 0.00889916 | 162971.983 | 20.2741003 | 1310039250 | cg06522557 | 0.01621773 | 688.036197 | 3.34276957 | 141617.243 |
| cg01577760 | 0.00890102 | 7.04328614 | 1.6314094  | 30.4079894 | cg23732024 | 0.01621807 | 5.05175301 | 1.34872633 | 18.92171   |
| cg17808849 | 0.00890967 | 90.9183326 | 3.09675692 | 2669.2903  | cg11354857 | 0.01623122 | 0.13832289 | 0.02756616 | 0.69408369 |
| cg15056189 | 0.00891987 | 119.450087 | 3.31423719 | 4305.16056 | cg20707345 | 0.01624505 | 7007066.21 | 18.3206224 | 2.68E+12   |
| cg03531211 | 0.0089199  | 10.3303805 | 1.79497931 | 59.45292   | cg02025938 | 0.01624769 | 5014950.99 | 17.2188586 | 1.4606E+12 |
| cg21361094 | 0.00892004 | 4.80614536 | 1.48185178 | 15.5879512 | cg13016775 | 0.01625138 | 25.0137975 | 1.81085676 | 345.521566 |
| cg19223541 | 0.00892014 | 73293.2208 | 16.549994  | 324585991  | cg25392584 | 0.01625543 | 33537009.2 | 24.4228035 | 4.6052E+13 |
| cg05171100 | 0.0089336  | 10905901   | 57.8146965 | 2.0572E+12 | cg13643339 | 0.01627233 | 21219.9942 | 6.27111756 | 71803494.2 |
| cg01141252 | 0.00893617 | 1.0207E+12 | 1014.76701 | 1.03E+21   | cg13851767 | 0.01628073 | 13.6889478 | 1.61934982 | 115.717611 |
| cg08846852 | 0.00894166 | 6.62774603 | 1.6053697  | 27.3625555 | cg15971010 | 0.01628778 | 5.74364794 | 1.37979898 | 23.9089114 |
| cg04519918 | 0.0089436  | 25245.7459 | 12.6387911 | 50427899.4 | cg07000955 | 0.01632318 | 92.0869544 | 2.29724153 | 3691.38684 |
| cg02249490 | 0.00894394 | 18.4262391 | 2.07342062 | 163.751766 | cg11540692 | 0.01632522 | 17.6168251 | 1.69473095 | 183.127903 |
| cg11417025 | 0.0089459  | 6.82095702 | 1.61681291 | 28.7760286 | cg27558095 | 0.01632884 | 6.04606429 | 1.39211594 | 26.2585122 |
| cg02464093 | 0.0089512  | 666.527591 | 5.08700944 | 87332.0631 | cg21159993 | 0.01633217 | 30.6478179 | 1.87603105 | 500.678677 |
| cg05585263 | 0.00895363 | 0.09689223 | 0.01683298 | 0.55772084 | cg21887246 | 0.01633426 | 16149167.9 | 21.131792  | 1.2341E+13 |
| cg02962602 | 0.00895444 | 13.1527965 | 1.90509271 | 90.8071584 | cg00865356 | 0.01633894 | 3274.67878 | 4.42589287 | 2422905.71 |
| cg00071950 | 0.00895609 | 33.5234465 | 2.40729871 | 466.839226 | cg02779075 | 0.01633992 | 62.8745183 | 2.14043296 | 1846.91841 |
| cg14744703 | 0.00895656 | 26456.561  | 12.7693687 | 54814739.5 | cg08183125 | 0.01634655 | 25.4262723 | 1.812069   | 356.771913 |
| cg03326188 | 0.00896246 | 23.5057105 | 2.2022722  | 250.88562  | cg26834010 | 0.01635018 | 600719.764 | 11.520789  | 3.1323E+10 |
| cg05596265 | 0.00896588 | 17.617425  | 2.04884741 | 151.48696  | cg06323837 | 0.01635454 | 3053.41764 | 4.36519388 | 2135840.82 |
| cg12606911 | 0.00896792 | 5.87639955 | 1.55695277 | 22.1792674 | cg13386351 | 0.0163554  | 8.82503502 | 1.4916975  | 52.20981   |
| cg01774894 | 0.00897146 | 3.64834065 | 1.38197565 | 9.63142112 | cg00086730 | 0.01635895 | 660204.306 | 11.7118712 | 3.7216E+10 |
| cg05309179 | 0.0089728  | 8.83450261 | 1.72382092 | 45.2764178 | cg01421867 | 0.01636136 | 923294.786 | 12.4527078 | 6.8457E+10 |
| cg19082003 | 0.00898336 | 5359646404 | 269.532939 | 1.0658E+17 | cg00519002 | 0.01636868 | 5.89436819 | 1.38488257 | 25.0877419 |
| cg19183317 | 0.00899435 | 13.1809576 | 1.90396915 | 91.25024   | cg14044905 | 0.01637432 | 9.42E-10   | 4.02E-17   | 0.02206339 |
| cg14058329 | 0.00900179 | 12.2422666 | 1.86878635 | 80.1980878 | cg00181849 | 0.01637531 | 0.10046578 | 0.01538738 | 0.6559516  |
| cg13730743 | 0.00900681 | 14.5407486 | 1.95051501 | 108.39874  | cg24684765 | 0.01637589 | 1035.20883 | 3.57470294 | 299789.195 |
| cg25137841 | 0.00900939 | 38.8861443 | 2.49300921 | 606.548991 | cg04712436 | 0.01637965 | 10554.7069 | 5.47222148 | 20357699.1 |



|            |            |            |            |            |            |            |            |            |            |
|------------|------------|------------|------------|------------|------------|------------|------------|------------|------------|
| cg27571057 | 0.00901206 | 0.02621684 | 0.0017051  | 0.40309942 | cg04876124 | 0.01638347 | 0.13738961 | 0.0271668  | 0.69481518 |
| cg14400079 | 0.00901372 | 3.1884E+17 | 23285.5333 | 4.37E+30   | cg26644853 | 0.01638901 | 14.3738516 | 1.63039341 | 126.72255  |
| cg12080566 | 0.00901684 | 15.2745657 | 1.97404109 | 118.190224 | cg17611742 | 0.01639415 | 13.1128845 | 1.60300883 | 107.265623 |
| cg25542733 | 0.00901859 | 524907.854 | 26.720158  | 1.0312E+10 | cg09537434 | 0.01639693 | 16446.5673 | 5.92858246 | 45624662.9 |
| cg27361964 | 0.00901894 | 40.2879257 | 2.5141711  | 645.587309 | cg21361094 | 0.01639921 | 4.78073875 | 1.33218008 | 17.1564366 |
| cg03623835 | 0.00902014 | 7.03793556 | 1.62695532 | 30.4449277 | cg05802477 | 0.01641297 | 5.3183E+10 | 92.277273  | 3.0652E+19 |
| cg13695646 | 0.00902075 | 11.8219873 | 1.851615   | 75.4797209 | cg25365404 | 0.01641625 | 23916.3673 | 6.34048076 | 90212816.2 |
| cg22706947 | 0.00902671 | 1.0968E+10 | 318.828756 | 3.773E+17  | cg03123289 | 0.01642268 | 17.5430078 | 1.68983223 | 182.122887 |
| cg05651282 | 0.00902693 | 15.1238523 | 1.96857636 | 116.191026 | cg08700651 | 0.01642668 | 16.7929541 | 1.67622006 | 168.237641 |
| cg10052561 | 0.0090275  | 6.41749943 | 1.58969566 | 25.9070336 | cg17369196 | 0.01643647 | 34.0343915 | 1.90718632 | 607.355343 |
| cg11228744 | 0.00903032 | 0.12415926 | 0.02593246 | 0.59444883 | cg02277383 | 0.01645294 | 125.236321 | 2.41932455 | 6482.85741 |
| cg04039397 | 0.00903289 | 5.89131892 | 1.55598256 | 22.3059304 | cg21535580 | 0.01645925 | 19.7712117 | 1.72581555 | 226.502081 |
| cg03776080 | 0.00903423 | 16.4129273 | 2.00869293 | 134.10919  | cg01492656 | 0.0164637  | 63.616597  | 2.13669416 | 1894.08081 |
| cg05351940 | 0.00903673 | 70336.4478 | 16.1488436 | 306351094  | cg20999932 | 0.01646573 | 6.25332609 | 1.39810187 | 27.969412  |
| cg26220419 | 0.00903877 | 2682771.14 | 40.0089498 | 1.7989E+11 | cg10737521 | 0.01647622 | 52.7594572 | 2.06405202 | 1348.5902  |
| cg05292799 | 0.0090395  | 1.4329E+11 | 602.989707 | 3.4051E+19 | cg05198244 | 0.01649091 | 0.11574042 | 0.01986085 | 0.67448494 |
| cg02568374 | 0.00904734 | 52813031.5 | 83.9406906 | 3.3228E+13 | cg20919942 | 0.01650005 | 10.7508769 | 1.54273877 | 74.9195891 |
| cg03975690 | 0.00904843 | 235.24653  | 3.89754543 | 14198.9184 | cg17007872 | 0.01650796 | 4.878E+11  | 135.836085 | 1.75E+21   |
| cg19245758 | 0.00905022 | 14.003131  | 1.92985203 | 101.607623 | cg10538030 | 0.01651083 | 3403587856 | 54.8654921 | 2.1114E+17 |
| cg24368491 | 0.00905171 | 0.09180741 | 0.01527866 | 0.55165832 | cg10684940 | 0.01651145 | 355114.224 | 10.2980137 | 1.2246E+10 |
| cg06352088 | 0.00905307 | 127.983117 | 3.34830785 | 4891.92724 | cg01698298 | 0.01651417 | 5.48646592 | 1.36420795 | 22.0650439 |
| cg01415527 | 0.00905514 | 1.56E-06   | 6.76E-11   | 0.03576884 | cg03871329 | 0.01651521 | 28582509.4 | 22.9230481 | 3.5639E+13 |
| cg15890111 | 0.00905537 | 645556.986 | 27.985062  | 1.4892E+10 | cg24153071 | 0.01651924 | 5163149.46 | 16.7680684 | 1.5898E+12 |
| cg11297817 | 0.0090572  | 3.74E-15   | 5.47E-26   | 0.00025539 | cg21819468 | 0.01656424 | 6.71811691 | 1.41453733 | 31.9066126 |
| cg10858568 | 0.00906205 | 2491.30462 | 7.00828039 | 885609.357 | cg25913761 | 0.0165752  | 480.241087 | 3.0759777  | 74978.275  |
| cg21087137 | 0.00906227 | 4.96767299 | 1.49045952 | 16.5571588 | cg03075736 | 0.01657657 | 84655.0371 | 7.883224   | 909079242  |
| cg14364729 | 0.00906432 | 135590149  | 105.800411 | 1.7377E+14 | cg09175928 | 0.01658243 | 5.9619E+14 | 487.617192 | 7.29E+26   |
| cg06155802 | 0.00906723 | 1166293.28 | 32.3680662 | 4.2024E+10 | cg08686462 | 0.01658843 | 91.6056454 | 2.27427408 | 3689.79022 |
| cg26644853 | 0.00906766 | 11.7948095 | 1.84822367 | 75.2709394 | cg17891715 | 0.01659366 | 3076368.42 | 15.1292012 | 6.2555E+11 |
| cg08638929 | 0.00906901 | 7.0471376  | 1.62579711 | 30.5463381 | cg14181387 | 0.01659604 | 7720.39951 | 5.09187018 | 11705830.4 |

|            |            |            |            |            |            |            |            |            |            |
|------------|------------|------------|------------|------------|------------|------------|------------|------------|------------|
| cg24579247 | 0.00907347 | 1.3192E+12 | 1037.76896 | 1.68E+21   | cg06090660 | 0.01660589 | 6.73489184 | 1.41433158 | 32.0708161 |
| cg26072749 | 0.00907496 | 7.09941852 | 1.62858482 | 30.9481844 | cg10418263 | 0.01660704 | 16.464562  | 1.66379783 | 162.929533 |
| cg16903217 | 0.00908053 | 65.2857686 | 2.82795735 | 1507.17676 | cg06469542 | 0.0166086  | 18.413853  | 1.69792081 | 199.697171 |
| cg23500601 | 0.00908405 | 511904.281 | 26.3061826 | 9961384259 | cg11491247 | 0.01661105 | 17.0856565 | 1.67488887 | 174.291957 |
| cg04054731 | 0.00908905 | 15.5770075 | 1.97944923 | 122.58115  | cg25102206 | 0.0166149  | 27.9133945 | 1.83097283 | 425.542958 |
| cg00945244 | 0.00909446 | 6.9475E+13 | 2762.7579  | 1.75E+24   | cg04329105 | 0.0166212  | 42.8387785 | 1.9788016  | 927.410276 |
| cg27384769 | 0.00909701 | 27926.913  | 12.7421808 | 61207141.7 | cg22053945 | 0.01662946 | 12.3829043 | 1.57917075 | 97.0992648 |
| cg18800235 | 0.00910001 | 6.27552204 | 1.5785671  | 24.9480537 | cg26649219 | 0.01663391 | 1.24E-11   | 1.46E-20   | 0.01046884 |
| cg06178310 | 0.00910175 | 8.40875158 | 1.69759051 | 41.6514482 | cg13818424 | 0.01663786 | 5.94558529 | 1.3820549  | 25.5778439 |
| cg22923514 | 0.0091055  | 35.2243918 | 2.42320294 | 512.032137 | cg04846715 | 0.01664441 | 455.497144 | 3.03679097 | 68321.3463 |
| cg13753515 | 0.00911095 | 16.7545201 | 2.01429882 | 139.360625 | cg17405853 | 0.0166455  | 0.09758166 | 0.01452511 | 0.65556657 |
| cg14412322 | 0.00911389 | 9.04792713 | 1.72828394 | 47.367787  | cg12409211 | 0.01664781 | 732.977382 | 3.31003423 | 162311.265 |
| cg27195224 | 0.00911394 | 0.12635061 | 0.02668887 | 0.59816989 | cg26923490 | 0.01665705 | 6.27918203 | 1.39544699 | 28.2548368 |
| cg13717333 | 0.009116   | 1.1334E+10 | 314.316941 | 4.0871E+17 | cg19936731 | 0.01666221 | 25221306.4 | 21.9861594 | 2.8932E+13 |
| cg13458803 | 0.00911798 | 8.25735519 | 1.68931485 | 40.361875  | cg11094694 | 0.01666322 | 2.5306E+12 | 177.402888 | 3.61E+22   |
| cg10476085 | 0.0091183  | 32.7097414 | 2.37786193 | 449.953451 | cg26014634 | 0.01666409 | 9.49667289 | 1.50399863 | 59.9646797 |
| cg25001691 | 0.00912162 | 64370.4929 | 15.635691  | 265006538  | cg17695512 | 0.01666865 | 0.12944143 | 0.02427223 | 0.69029843 |
| cg00915178 | 0.00912184 | 17.7530932 | 2.04278649 | 154.285492 | cg25755283 | 0.01667461 | 7.66190507 | 1.44634766 | 40.5882978 |
| cg27147000 | 0.00912291 | 7.25021369 | 1.63543979 | 32.1415676 | cg01972009 | 0.01669173 | 31.0813577 | 1.86337784 | 518.440638 |
| cg05001531 | 0.00912943 | 0.00401892 | 6.35E-05   | 0.25423947 | cg01558040 | 0.01669881 | 0.00010572 | 5.86E-08   | 0.19061615 |
| cg21577260 | 0.0091353  | 1.2671E+15 | 5599.74448 | 2.87E+26   | cg18299211 | 0.01670204 | 1808.80574 | 3.8875962  | 841594.15  |
| cg16270051 | 0.00913843 | 0.11447113 | 0.02243728 | 0.58401195 | cg09481857 | 0.01671554 | 28.7726042 | 1.83640692 | 450.805726 |
| cg23343073 | 0.00914139 | 89.1000765 | 3.04639874 | 2605.96997 | cg24032330 | 0.01671627 | 0.01404943 | 0.00042702 | 0.46224409 |
| cg20501434 | 0.00914162 | 11.0929498 | 1.81670857 | 67.7343288 | cg04718145 | 0.01671726 | 10.0135004 | 1.51712122 | 66.0924055 |
| cg19695710 | 0.0091536  | 0.08856717 | 0.0143087  | 0.54820803 | cg00226923 | 0.01672714 | 33.0667639 | 1.88263792 | 580.786599 |
| cg16489586 | 0.00915896 | 20.201698  | 2.10685055 | 193.70553  | cg12501949 | 0.01673002 | 44.7381196 | 1.98825866 | 1006.65944 |
| cg02583309 | 0.00915935 | 5.39265011 | 1.51854072 | 19.1504085 | cg05887405 | 0.01673567 | 7.45377625 | 1.43782057 | 38.6409692 |
| cg17108996 | 0.00916028 | 1739.36944 | 6.35794504 | 475846.524 | cg10147797 | 0.01673898 | 4.45962456 | 1.31027177 | 15.1787223 |
| cg07647796 | 0.00916623 | 43055.257  | 14.0770329 | 131686498  | cg02532538 | 0.01674626 | 14.3739701 | 1.61871378 | 127.639005 |
| cg05172655 | 0.00917094 | 0.05444858 | 0.00609798 | 0.48616892 | cg16806210 | 0.01674854 | 1612.70374 | 3.79786058 | 684810.115 |

|            |            |            |            |            |            |            |            |            |            |
|------------|------------|------------|------------|------------|------------|------------|------------|------------|------------|
| cg21753200 | 0.00917579 | 462206558  | 140.160669 | 1.5242E+15 | cg19878627 | 0.01675344 | 14.765208  | 1.62635176 | 134.049332 |
| cg18492126 | 0.00917885 | 16.5483947 | 2.00398467 | 136.652427 | cg06561044 | 0.01675518 | 17199071.9 | 20.2743076 | 1.459E+13  |
| cg04415434 | 0.0091856  | 3.6828E+14 | 4046.5579  | 3.35E+25   | cg10029031 | 0.01675537 | 2186029653 | 48.6412288 | 9.8244E+16 |
| cg25783099 | 0.00918851 | 18.5255296 | 2.06017336 | 166.585616 | cg19558029 | 0.01676137 | 9.36315574 | 1.49769183 | 58.5358642 |
| cg21647780 | 0.00919089 | 1055610.01 | 30.9943772 | 3.5952E+10 | cg18780769 | 0.01677871 | 9.43436296 | 1.49930458 | 59.3656591 |
| cg14527250 | 0.00919248 | 11.7798263 | 1.84149821 | 75.3540285 | cg13997647 | 0.01678452 | 3.3182E+14 | 416.588497 | 2.64E+26   |
| cg05377387 | 0.00919561 | 29.3790918 | 2.3087577  | 373.850853 | cg11141711 | 0.01678642 | 1.0275E+14 | 337.024512 | 3.13E+25   |
| cg08183066 | 0.00919596 | 123936.979 | 18.2256484 | 842788927  | cg04154281 | 0.01680205 | 80.1925691 | 2.20431521 | 2917.39045 |
| cg11970289 | 0.00920339 | 6.65574338 | 1.59843158 | 27.713992  | cg19573564 | 0.01680234 | 849873.028 | 11.7197946 | 6.1629E+10 |
| cg13646565 | 0.00920454 | 41551.2867 | 13.8924305 | 124276989  | cg04102760 | 0.01680697 | 7615.6341  | 5.00776291 | 11581595.2 |
| cg04799823 | 0.00920454 | 1.0585E+10 | 302.283073 | 3.7066E+17 | cg17322163 | 0.01680887 | 128270.767 | 8.32957179 | 1975298394 |
| cg04751811 | 0.00920769 | 3.65692612 | 1.37820224 | 9.70329911 | cg10657141 | 0.01681364 | 28.0177267 | 1.82311841 | 430.577084 |
| cg09035101 | 0.00920837 | 261163.551 | 21.8819088 | 3117022433 | cg01505767 | 0.01682526 | 11.4695451 | 1.55177528 | 84.7741717 |
| cg25309564 | 0.00920885 | 5.2251E+10 | 448.213672 | 6.0912E+18 | cg17062109 | 0.01682973 | 5.16597525 | 1.34405778 | 19.8557686 |
| cg06508783 | 0.0092166  | 8.33900989 | 1.68963246 | 41.1563387 | cg23600666 | 0.01684251 | 48896845.5 | 24.2036124 | 9.8783E+13 |
| cg08493879 | 0.00924813 | 140617818  | 102.862561 | 1.9223E+14 | cg12074985 | 0.01684352 | 12.7390767 | 1.58084451 | 102.656571 |
| cg24550644 | 0.00924941 | 4.21422317 | 1.42650404 | 12.4497909 | cg06132502 | 0.0168522  | 14.5301048 | 1.61843534 | 130.449416 |
| cg16701456 | 0.00925242 | 6.71668087 | 1.60043422 | 28.1884762 | cg13561226 | 0.01685616 | 232.849233 | 2.6654667  | 20341.1903 |
| cg13401703 | 0.00925368 | 5.47542949 | 1.52165907 | 19.7023951 | cg16745967 | 0.01685899 | 32475.3683 | 6.47756973 | 162815622  |
| cg08309135 | 0.00925839 | 0.06183727 | 0.00760122 | 0.50305743 | cg24619626 | 0.0168618  | 0.0695462  | 0.00781164 | 0.6191628  |
| cg01029638 | 0.00927019 | 6.69684    | 1.59868656 | 28.0528198 | cg20577613 | 0.01686659 | 4911022685 | 55.2618851 | 4.3643E+17 |
| cg08473725 | 0.00927747 | 20.1521721 | 2.09752929 | 193.613526 | cg11636504 | 0.01689995 | 37.2184233 | 1.91435825 | 723.590287 |
| cg02636234 | 0.00928593 | 2.0246E+10 | 347.616878 | 1.1791E+18 | cg11934304 | 0.01690177 | 9.42857978 | 1.49604504 | 59.4220855 |
| cg21502466 | 0.00928872 | 159.515969 | 3.49181687 | 7287.13594 | cg21844656 | 0.01690244 | 0.09199832 | 0.01298942 | 0.65158364 |
| cg09996156 | 0.00929436 | 321.472542 | 4.14885527 | 24909.1829 | cg00221357 | 0.01690751 | 2294064.66 | 13.8567662 | 3.798E+11  |
| cg06422678 | 0.00930073 | 6.99423351 | 1.61489028 | 30.2926478 | cg25295726 | 0.01691623 | 171.36836  | 2.51664364 | 11669.1589 |
| cg21789849 | 0.00931676 | 13185.5144 | 10.3390784 | 16815598.6 | cg02160530 | 0.0169182  | 10.5625637 | 1.52642051 | 73.0910982 |
| cg03991512 | 0.00931718 | 14.5386737 | 1.93303883 | 109.347536 | cg25196508 | 0.01692213 | 18.1874151 | 1.6825896  | 196.591057 |
| cg14878065 | 0.00931893 | 3714.97177 | 7.56726971 | 1823777.37 | cg11009335 | 0.01692517 | 17089497.6 | 19.8264777 | 1.473E+13  |
| cg14059420 | 0.00932734 | 14.4866225 | 1.93077228 | 108.693415 | cg20733436 | 0.01693975 | 7.78788888 | 1.44472796 | 41.9810613 |

|            |            |            |            |            |            |            |            |            |            |
|------------|------------|------------|------------|------------|------------|------------|------------|------------|------------|
| cg20377955 | 0.00933316 | 7.91621757 | 1.66372945 | 37.6662809 | cg09829176 | 0.0169539  | 52.4386835 | 2.03265873 | 1352.81712 |
| cg26222247 | 0.00934172 | 9.38518039 | 1.73453622 | 50.7810734 | cg09937438 | 0.01695633 | 18.8437405 | 1.69205606 | 209.855077 |
| cg01851874 | 0.00934415 | 11.0122217 | 1.80398934 | 67.2226965 | cg02926965 | 0.01696033 | 528.666136 | 3.0740414  | 90918.7116 |
| cg01421695 | 0.00934484 | 226.249958 | 3.79367089 | 13493.2747 | cg06897790 | 0.01696537 | 7168364.45 | 16.8856606 | 3.0431E+12 |
| cg09663203 | 0.00934638 | 26213888.7 | 66.7273991 | 1.0298E+13 | cg10477603 | 0.01699137 | 3224743.83 | 14.5927827 | 7.1261E+11 |
| cg09467487 | 0.00934853 | 205.978591 | 3.70632027 | 11447.2514 | cg25387636 | 0.01699719 | 7.47758954 | 1.43300276 | 39.0190074 |
| cg13572309 | 0.00935613 | 21.7938427 | 2.13291186 | 222.686924 | cg04164415 | 0.01699778 | 6.65631676 | 1.40348572 | 31.5689373 |
| cg00571021 | 0.00935766 | 12.1646601 | 1.8480273  | 80.0740095 | cg27249554 | 0.01701208 | 20.263326  | 1.7120744  | 239.827417 |
| cg20201566 | 0.00936047 | 530980.244 | 25.5272885 | 1.1045E+10 | cg13296579 | 0.01702115 | 0.11975458 | 0.02095274 | 0.68445275 |
| cg13159805 | 0.00936116 | 4920752138 | 240.911827 | 1.0051E+17 | cg20439022 | 0.01702247 | 20.9895282 | 1.72247653 | 255.771435 |
| cg11717150 | 0.00936254 | 1.6489E+10 | 324.164958 | 8.3868E+17 | cg19507527 | 0.01702614 | 5.76533407 | 1.36737496 | 24.3086774 |
| cg05342320 | 0.00936461 | 3.243E+19  | 62256.2193 | 1.69E+34   | cg26832893 | 0.0170393  | 5830.82969 | 4.70124401 | 7231825.18 |
| cg04674060 | 0.00936934 | 68.9180417 | 2.82890404 | 1678.98819 | cg12699865 | 0.01704096 | 40.833377  | 1.93891629 | 859.946708 |
| cg07677850 | 0.0093703  | 0.00505432 | 9.36E-05   | 0.27282784 | cg19624799 | 0.01706682 | 5043.93845 | 4.57316425 | 5563175.46 |
| cg12084452 | 0.00937339 | 123601.427 | 17.8124708 | 857675110  | cg24448952 | 0.01708402 | 133388.414 | 8.18789377 | 2173021480 |
| cg08084502 | 0.00937427 | 15.5648298 | 1.96249408 | 123.44696  | cg07453451 | 0.01708841 | 16.6874426 | 1.65105101 | 168.662713 |
| cg00476675 | 0.00937792 | 0.10482914 | 0.01912098 | 0.57471676 | cg26493224 | 0.01711031 | 13.7488369 | 1.59437131 | 118.561163 |
| cg07676709 | 0.00938552 | 15.565993  | 1.96188544 | 123.503714 | cg01618834 | 0.01711366 | 384.139746 | 2.88353485 | 51174.4619 |
| cg14539231 | 0.0093869  | 9.66990481 | 1.74542809 | 53.5725645 | cg00986320 | 0.01711852 | 7861.28153 | 4.93271452 | 12528547.3 |
| cg00374492 | 0.00938756 | 49.2499224 | 2.60280023 | 931.902046 | cg10089657 | 0.01712095 | 127.455692 | 2.36890391 | 6857.58232 |
| cg07059157 | 0.00938876 | 0.0101621  | 0.00031855 | 0.32418473 | cg09527192 | 0.01712145 | 559.908443 | 3.08237315 | 101706.526 |
| cg14029891 | 0.00939296 | 5.6883E+11 | 767.117332 | 4.22E+20   | cg18117600 | 0.01713384 | 6.18278938 | 1.38253982 | 27.6497529 |
| cg25134747 | 0.00939341 | 0.01724457 | 0.00080547 | 0.36919384 | cg22219587 | 0.01713817 | 3406.51891 | 4.24574838 | 2733174.48 |
| cg00054210 | 0.00940656 | 9.33563937 | 1.72961285 | 50.3894051 | cg14884929 | 0.01713847 | 8.10994761 | 1.45076843 | 45.3354572 |
| cg21476299 | 0.0094202  | 8.29800663 | 1.67983019 | 40.9904016 | cg08378932 | 0.01714578 | 10.6426689 | 1.52238797 | 74.4004828 |
| cg22630231 | 0.00942784 | 1637541295 | 181.092843 | 1.4808E+16 | cg20712415 | 0.01716325 | 13.1664803 | 1.58053871 | 109.68172  |
| cg26593946 | 0.0094323  | 0.10663883 | 0.01967842 | 0.5778837  | cg05367052 | 0.01716445 | 202255.264 | 8.75427956 | 4672822189 |
| cg19716433 | 0.00943519 | 7290.02644 | 8.83579992 | 6014677.34 | cg19038228 | 0.01716715 | 4353843.88 | 15.0937381 | 1.2559E+12 |
| cg00170056 | 0.00944186 | 574.96114  | 4.74055091 | 69734.577  | cg22731763 | 0.01716816 | 0.02055601 | 0.00084221 | 0.50171646 |
| cg26987660 | 0.00944861 | 7.84926822 | 1.65606572 | 37.2032408 | cg09275980 | 0.01717162 | 0.08443899 | 0.01105741 | 0.6448114  |

|            |            |            |            |            |            |            |            |            |            |
|------------|------------|------------|------------|------------|------------|------------|------------|------------|------------|
| cg06106312 | 0.0094526  | 2101246.86 | 35.2890897 | 1.2512E+11 | cg15664069 | 0.01718193 | 10481.1816 | 5.16920293 | 21251858.4 |
| cg11479035 | 0.00945339 | 0.14807283 | 0.03499436 | 0.62654558 | cg26837270 | 0.0171878  | 1279668488 | 41.2727118 | 3.9676E+16 |
| cg25556905 | 0.00945757 | 3.47361004 | 1.35626971 | 8.89643599 | cg00088688 | 0.01719434 | 17.382768  | 1.65938003 | 182.092479 |
| cg07830103 | 0.00947233 | 958677.338 | 29.0381508 | 3.165E+10  | cg16249035 | 0.01719495 | 0.04391834 | 0.00335756 | 0.5744704  |
| cg00820311 | 0.00947243 | 0.12391913 | 0.02559008 | 0.6000743  | cg08749351 | 0.0171959  | 280.375335 | 2.71706227 | 28932.1041 |
| cg15813594 | 0.00947584 | 12.6186399 | 1.85882984 | 85.661457  | cg23666180 | 0.01722899 | 364.07882  | 2.84180625 | 46644.0621 |
| cg15929495 | 0.00947901 | 26534747.6 | 65.3367898 | 1.0776E+13 | cg17721173 | 0.01724423 | 21589.3035 | 5.84948248 | 79681925.3 |
| cg24085895 | 0.00947902 | 118.873301 | 3.21638183 | 4393.403   | cg09002922 | 0.01724617 | 12.4328009 | 1.56211201 | 98.9522757 |
| cg15742840 | 0.00948106 | 0.07320574 | 0.01015523 | 0.52771634 | cg17114257 | 0.0172505  | 255.691017 | 2.66704472 | 24513.2359 |
| cg22053945 | 0.0094888  | 9.08899665 | 1.71499411 | 48.1691801 | cg03368099 | 0.01725125 | 13.908296  | 1.59326844 | 121.41124  |
| cg24315913 | 0.00949717 | 254458.557 | 20.9248585 | 3094365361 | cg18870532 | 0.01726807 | 2576.33897 | 4.00971658 | 1655359.51 |
| cg25792651 | 0.00949924 | 10.5322874 | 1.77743305 | 62.4097081 | cg10625266 | 0.01727405 | 34.8003385 | 1.87286215 | 646.637852 |
| cg05291965 | 0.00950023 | 94.786723  | 3.04005479 | 2955.38189 | cg19265600 | 0.01728546 | 72.2764187 | 2.1303875  | 2452.08005 |
| cg01205267 | 0.00950632 | 9.70562083 | 1.74199696 | 54.0753388 | cg01101663 | 0.01728893 | 29.2353406 | 1.81538138 | 470.812992 |
| cg23033906 | 0.00953603 | 5.4422313  | 1.51167595 | 19.592745  | cg14546261 | 0.01730446 | 301501472  | 31.4039435 | 2.8946E+15 |
| cg09975039 | 0.00953848 | 9.30047497 | 1.72264955 | 50.2126707 | cg12379940 | 0.01730715 | 7.31870756 | 1.42100388 | 37.6941127 |
| cg16236960 | 0.00954071 | 40.9434222 | 2.4725103  | 678.000743 | cg13099644 | 0.01730984 | 151441.017 | 8.21005071 | 2793451885 |
| cg03219968 | 0.0095453  | 5.34221915 | 1.50460666 | 18.967951  | cg20748955 | 0.01731096 | 19.8310655 | 1.69425609 | 232.120257 |
| cg05110225 | 0.00954668 | 247.38252  | 3.83251005 | 15968.1542 | cg16903510 | 0.01731275 | 16277280.6 | 18.7385212 | 1.4139E+13 |
| cg15685783 | 0.00955231 | 0.00260367 | 2.89E-05   | 0.23447387 | cg00557469 | 0.01731584 | 9075.66127 | 4.99362159 | 16494567.3 |
| cg23514672 | 0.00955686 | 0.00088546 | 4.35E-06   | 0.18033168 | cg12404990 | 0.01731823 | 132515.06  | 8.01300838 | 2191466714 |
| cg14280533 | 0.00955807 | 6.82824431 | 1.59697325 | 29.1958054 | cg24326232 | 0.01732024 | 14.4866683 | 1.60261552 | 130.950659 |
| cg03169836 | 0.00956012 | 40.8768936 | 2.46966016 | 676.579093 | cg09578291 | 0.01732298 | 75.2490261 | 2.14305217 | 2642.22029 |
| cg05531055 | 0.00956161 | 8.6497E+10 | 461.990191 | 1.6195E+19 | cg01819502 | 0.01732879 | 20.7899424 | 1.70775489 | 253.093525 |
| cg18098433 | 0.00956472 | 0.15405932 | 0.03743318 | 0.63404369 | cg24527881 | 0.01733213 | 73.3469955 | 2.13277793 | 2522.4294  |
| cg23005196 | 0.00956692 | 12503.6121 | 9.95294396 | 15707947   | cg19060120 | 0.0173421  | 596.28389  | 3.08479234 | 115260.425 |
| cg10007534 | 0.00956784 | 0.0054571  | 0.00010596 | 0.28105637 | cg12360736 | 0.01734648 | 6.83519336 | 1.40318079 | 33.2956869 |
| cg06028808 | 0.00957938 | 54.8849977 | 2.65134778 | 1136.1629  | cg15680518 | 0.01735723 | 232136867  | 29.7638459 | 1.8105E+15 |
| cg27639104 | 0.00958468 | 0.01661286 | 0.0007482  | 0.36886663 | cg19778003 | 0.01738232 | 10.5326703 | 1.51334967 | 73.3056908 |
| cg23637385 | 0.00958919 | 6.70537147 | 1.58893468 | 28.2969508 | cg24659411 | 0.01738402 | 36017.3213 | 6.33529056 | 204765262  |

|            |            |            |            |            |            |            |            |            |            |
|------------|------------|------------|------------|------------|------------|------------|------------|------------|------------|
| cg06480736 | 0.00959119 | 16.9039931 | 1.98975481 | 143.608138 | cg00984602 | 0.01738997 | 902894.088 | 11.1608459 | 7.3043E+10 |
| cg13250618 | 0.00960368 | 15008255.5 | 55.6206519 | 4.0497E+12 | cg18132058 | 0.01739756 | 0.05188991 | 0.00453036 | 0.59433738 |
| cg05135288 | 0.00960694 | 17.7773769 | 2.01333887 | 156.970659 | cg08963608 | 0.01739824 | 5425003056 | 51.5055293 | 5.7141E+17 |
| cg00283472 | 0.00960833 | 19.8071176 | 2.0668794  | 189.813643 | cg14816013 | 0.0174086  | 99.99989   | 2.24677785 | 4450.80851 |
| cg00103132 | 0.00961037 | 118456633  | 91.8058312 | 1.5284E+14 | cg23574802 | 0.01743609 | 23.2706593 | 1.73772891 | 311.627192 |
| cg03809032 | 0.00961407 | 2853.45481 | 6.91747337 | 1177048.89 | cg22122291 | 0.01743898 | 47389847.3 | 22.2598036 | 1.0089E+14 |
| cg19431272 | 0.00961443 | 13.9909056 | 1.89903551 | 103.07624  | cg27645955 | 0.0174423  | 8.60537395 | 1.45909231 | 50.7524167 |
| cg00935430 | 0.00961984 | 6175814826 | 239.538411 | 1.5923E+17 | cg06007678 | 0.01744801 | 102.36266  | 2.2530022  | 4650.73411 |
| cg09838956 | 0.00962008 | 0.07867975 | 0.01148299 | 0.53910183 | cg25161465 | 0.01745691 | 0.09363437 | 0.01328334 | 0.66002945 |
| cg05845178 | 0.0096258  | 7.78925513 | 1.64664325 | 36.846169  | cg27476456 | 0.01747141 | 9.77535268 | 1.4913839  | 64.0730535 |
| cg10230885 | 0.0096318  | 1822.9242  | 6.19495005 | 536413.147 | cg08932256 | 0.01747161 | 0.14754976 | 0.03044928 | 0.71499002 |
| cg05003455 | 0.00963252 | 688017481  | 140.145092 | 3.3777E+15 | cg15440392 | 0.01749109 | 20670861.3 | 19.1192068 | 2.2348E+13 |
| cg27321913 | 0.00963452 | 18.9766884 | 2.04381782 | 176.197066 | cg02311932 | 0.01749194 | 17.0115594 | 1.64281348 | 176.157035 |
| cg13071386 | 0.009636   | 7.39020749 | 1.62539069 | 33.6012549 | cg16429070 | 0.0175017  | 8.50307793 | 1.45467685 | 49.703365  |
| cg11776809 | 0.00963832 | 75121953   | 81.7484105 | 6.9033E+13 | cg06132694 | 0.0175068  | 293.530415 | 2.70388353 | 31865.3165 |
| cg01957751 | 0.00963856 | 0.04123023 | 0.0036872  | 0.46103622 | cg18997075 | 0.01751189 | 25.7868011 | 1.76614788 | 376.502512 |
| cg06342490 | 0.00964024 | 14.6571819 | 1.91924158 | 111.936393 | cg08786829 | 0.01751843 | 9.58293803 | 1.4850391  | 61.8385746 |
| cg22815785 | 0.00964147 | 2.5059E+10 | 334.846269 | 1.8753E+18 | cg20996682 | 0.01752823 | 10.5418885 | 1.50977423 | 73.6079683 |
| cg27002699 | 0.00964441 | 50.9966743 | 2.5973787  | 1001.26362 | cg13199010 | 0.01752832 | 138.695561 | 2.36947866 | 8118.43507 |
| cg24959938 | 0.00964707 | 0.1011769  | 0.01785125 | 0.57344796 | cg13159805 | 0.01753725 | 1.2173E+10 | 57.9835316 | 2.5555E+18 |
| cg27455796 | 0.00965178 | 624129.244 | 25.4950973 | 1.5279E+10 | cg17282836 | 0.01754117 | 23.7600919 | 1.73984476 | 324.478355 |
| cg27317433 | 0.00965737 | 10.9255425 | 1.78632053 | 66.8231025 | cg03506033 | 0.0175418  | 4.28649737 | 1.28971641 | 14.246589  |
| cg05153345 | 0.00965885 | 8.25525605 | 1.66883691 | 40.8363765 | cg01550215 | 0.017547   | 489938.781 | 9.87290409 | 2.4313E+10 |
| cg00190795 | 0.00966074 | 9.10532151 | 1.70892052 | 48.5141811 | cg20705565 | 0.01755649 | 832871088  | 36.1740809 | 1.9176E+16 |
| cg22215453 | 0.00966621 | 477741.977 | 23.8467868 | 9570991639 | cg03642503 | 0.01755871 | 35.1064943 | 1.86187017 | 661.950528 |
| cg04851348 | 0.00966866 | 7.39818145 | 1.62470705 | 33.6879739 | cg14000147 | 0.01755955 | 144574.949 | 7.96777011 | 2623308115 |
| cg00228891 | 0.00966922 | 24.9167193 | 2.18102435 | 284.656567 | cg04740941 | 0.01758711 | 391.600255 | 2.83388265 | 54113.3061 |
| cg13476078 | 0.00967116 | 0.01228821 | 0.00043879 | 0.34413102 | cg00353006 | 0.01758865 | 107.266615 | 2.26067952 | 5089.67616 |
| cg20878190 | 0.00967414 | 2.7383E+11 | 593.060084 | 1.26E+20   | cg26871717 | 0.01759845 | 172536.307 | 8.18959299 | 3634951982 |
| cg04154281 | 0.00968246 | 53.9657374 | 2.62914022 | 1107.70083 | cg01727686 | 0.01760374 | 12.3365212 | 1.54971401 | 98.2050582 |

|            |            |            |            |            |            |            |            |            |            |
|------------|------------|------------|------------|------------|------------|------------|------------|------------|------------|
| cg22415969 | 0.00968276 | 16.3239992 | 1.9676562  | 135.426579 | cg15363487 | 0.01761784 | 60576.371  | 6.8125872  | 538634826  |
| cg04623837 | 0.00968561 | 5.51262635 | 1.51237288 | 20.0936221 | cg04287755 | 0.01762255 | 0.08687098 | 0.01155083 | 0.65333567 |
| cg06467181 | 0.00968793 | 2.5817E+11 | 582.445567 | 1.14E+20   | cg15695155 | 0.01762758 | 9.08460683 | 1.46864197 | 56.1948269 |
| cg00756887 | 0.00968955 | 13.9076002 | 1.89236882 | 102.211229 | cg15134649 | 0.01763646 | 8.36373565 | 1.44744545 | 48.3279519 |
| cg21819468 | 0.00969175 | 5.34544073 | 1.5009667  | 19.0368891 | cg07744449 | 0.017641   | 58.2132938 | 2.02887593 | 1670.27837 |
| cg01120874 | 0.00969315 | 34.4828468 | 2.35775058 | 504.322524 | cg08247611 | 0.01764216 | 393926573  | 31.3486726 | 4.9501E+15 |
| cg07817320 | 0.00969587 | 69782.5138 | 14.9040082 | 326730847  | cg19915711 | 0.01764927 | 10.0033992 | 1.49295136 | 67.0269636 |
| cg22031999 | 0.00969761 | 277.566115 | 3.90673113 | 19720.5658 | cg22059438 | 0.01765341 | 10.2051588 | 1.49804343 | 69.5208597 |
| cg21115558 | 0.00970065 | 0.19181548 | 0.05488315 | 0.67039109 | cg16197879 | 0.01765502 | 327336.924 | 9.10937489 | 1.1763E+10 |
| cg03709297 | 0.00970215 | 0.11114094 | 0.0210283  | 0.5874136  | cg04559178 | 0.01766758 | 24.2130013 | 1.74047415 | 336.844665 |
| cg17106536 | 0.00970231 | 13418716.9 | 53.2195816 | 3.3834E+12 | cg27148665 | 0.01766959 | 10.7867578 | 1.51213593 | 76.946881  |
| cg04037038 | 0.00970546 | 3.88869449 | 1.38934332 | 10.8842391 | cg19077271 | 0.01766988 | 111.234826 | 2.26871363 | 5453.83353 |
| cg22974920 | 0.00970564 | 1.12E-12   | 9.83E-22   | 0.00127767 | cg24502391 | 0.01767232 | 4626.10548 | 4.3371614  | 4934299.17 |
| cg13886554 | 0.00971113 | 17.4024256 | 1.99671711 | 151.671168 | cg10037049 | 0.01767235 | 8.00604962 | 1.43569109 | 44.6452799 |
| cg21213853 | 0.00971982 | 11.3714918 | 1.80089373 | 71.8036965 | cg10454568 | 0.01767316 | 12.8769154 | 1.55932408 | 106.337708 |
| cg06815754 | 0.00972035 | 74275512.1 | 80.2702194 | 6.8728E+13 | cg21465517 | 0.01768046 | 5620378963 | 49.4812042 | 6.384E+17  |
| cg04983925 | 0.00972619 | 501.744394 | 4.50077623 | 55934.2264 | cg25256099 | 0.01768293 | 7.80074152 | 1.42899541 | 42.5834595 |
| cg03018496 | 0.00972892 | 0.18521254 | 0.05158003 | 0.66505747 | cg10896623 | 0.01768447 | 636.759215 | 3.07064138 | 132044.823 |
| cg01766718 | 0.00972941 | 0.12865995 | 0.02718292 | 0.60896267 | cg19744936 | 0.01769493 | 6.94213989 | 1.40009328 | 34.4214966 |
| cg11334692 | 0.00973591 | 3.5869E+16 | 10073.1354 | 1.28E+29   | cg27277974 | 0.01769907 | 20363.0089 | 5.60096512 | 74032264.3 |
| cg19473656 | 0.00973596 | 6.89168985 | 1.59484526 | 29.7805625 | cg14376467 | 0.01770083 | 15.1956557 | 1.60398149 | 143.959237 |
| cg19442545 | 0.00974452 | 265.344008 | 3.85384808 | 18269.3871 | cg15600915 | 0.0177034  | 17.4314865 | 1.64258532 | 184.986874 |
| cg13488070 | 0.00974985 | 825339.348 | 26.9072125 | 2.5316E+10 | cg10884788 | 0.01770399 | 11.7729239 | 1.53436543 | 90.3316349 |
| cg14021375 | 0.00974991 | 5.00060866 | 1.47547552 | 16.9478156 | cg14071762 | 0.01770534 | 663081096  | 34.003913  | 1.293E+16  |
| cg03756121 | 0.00975053 | 82070.7738 | 15.4018903 | 437323716  | cg14598198 | 0.01770776 | 15698.6671 | 5.35029649 | 46062521.6 |
| cg19628148 | 0.00975161 | 5.857848   | 1.53293848 | 22.3847099 | cg25234159 | 0.01771678 | 1596.23205 | 3.59607864 | 708537.55  |
| cg13591673 | 0.00975397 | 1.22E-11   | 6.42E-20   | 0.00230479 | cg13437538 | 0.01772325 | 117.891979 | 2.28751873 | 6075.80546 |
| cg02117197 | 0.00975472 | 513433.313 | 23.9751079 | 1.0995E+10 | cg14865516 | 0.0177277  | 2451287.79 | 12.8302877 | 4.6833E+11 |
| cg14457918 | 0.00975473 | 5828.44933 | 8.12509232 | 4180976.68 | cg21086156 | 0.01772962 | 134926213  | 25.7067182 | 7.0818E+14 |
| cg21657704 | 0.00975478 | 10.6620929 | 1.77151776 | 64.1710896 | cg14602697 | 0.01773113 | 1018.77799 | 3.32410294 | 312237.201 |

|            |            |            |            |            |            |            |            |            |            |
|------------|------------|------------|------------|------------|------------|------------|------------|------------|------------|
| cg13576178 | 0.00976855 | 128676.316 | 17.1324038 | 966448989  | cg19921353 | 0.01773499 | 2017.22711 | 3.7413869  | 1087619.47 |
| cg20031656 | 0.00977309 | 4.68610287 | 1.45195443 | 15.1241387 | cg01814537 | 0.01774704 | 4167183.11 | 14.0371043 | 1.2371E+12 |
| cg08545129 | 0.00977826 | 7.60175996 | 1.63166323 | 35.4158589 | cg03105222 | 0.01775786 | 9.71309011 | 1.48265546 | 63.6318565 |
| cg24994173 | 0.00977985 | 5.16480415 | 1.48628307 | 17.9475918 | cg00651087 | 0.0177642  | 775.513648 | 3.16542078 | 189997.305 |
| cg04738888 | 0.0097806  | 4.72418856 | 1.45461912 | 15.3428188 | cg25471923 | 0.01776467 | 10.6294895 | 1.50581739 | 75.0330342 |
| cg15198000 | 0.00978156 | 18.2177196 | 2.01469092 | 164.732618 | cg20664468 | 0.01776812 | 27685138.3 | 19.4387496 | 3.943E+13  |
| cg10920410 | 0.00978218 | 287704.03  | 20.7697021 | 3985305545 | cg27090985 | 0.01777856 | 1.0503E+10 | 54.261326  | 2.033E+18  |
| cg23994112 | 0.00978219 | 6.33426921 | 1.56126536 | 25.699005  | cg05012767 | 0.01778018 | 8.6346E+11 | 116.35527  | 6.41E+21   |
| cg02126424 | 0.00978229 | 343744.369 | 21.6808729 | 5449973898 | cg27523779 | 0.01778525 | 8.79809292 | 1.45683045 | 53.1334578 |
| cg17147211 | 0.00978497 | 8.87318255 | 1.69346646 | 46.4924287 | cg14058998 | 0.01778776 | 2357.82789 | 3.83256587 | 1450556.25 |
| cg02506053 | 0.00978644 | 3.3754E+10 | 347.040269 | 3.283E+18  | cg09622420 | 0.01778896 | 1921.00122 | 3.69884037 | 997676.38  |
| cg00714713 | 0.00978831 | 3075.79151 | 6.94291554 | 1362611.04 | cg13792279 | 0.01779252 | 0.13087734 | 0.02434965 | 0.70345488 |
| cg15063443 | 0.00978869 | 8.28451414 | 1.66551054 | 41.2084901 | cg15246590 | 0.01780164 | 28.9226615 | 1.78923212 | 467.530366 |
| cg11043450 | 0.00979477 | 1071.18167 | 5.38040234 | 213261.035 | cg00568384 | 0.01780608 | 7.94955367 | 1.43103984 | 44.1604782 |
| cg13958426 | 0.00980652 | 4.67951392 | 1.4506866  | 15.0948183 | cg06121514 | 0.01782555 | 0.09694321 | 0.01406382 | 0.66823865 |
| cg22786811 | 0.00980781 | 12.6860727 | 1.84492204 | 87.232109  | cg21665738 | 0.01782949 | 10.9580478 | 1.51207454 | 79.4132881 |
| cg15114202 | 0.00980905 | 2125709195 | 177.195465 | 2.5501E+16 | cg06185555 | 0.01783542 | 2932.14426 | 3.96891427 | 2166201.98 |
| cg05734154 | 0.00981337 | 10204.5958 | 9.25051493 | 11257078.9 | cg25703213 | 0.01784407 | 0.06117311 | 0.00606132 | 0.61738196 |
| cg14634738 | 0.00982063 | 531.420466 | 4.53583915 | 62261.4035 | cg05361096 | 0.01784501 | 6.10628646 | 1.36654505 | 27.2854044 |
| cg06148736 | 0.009821   | 5.40514184 | 1.50161023 | 19.456153  | cg02105002 | 0.01785099 | 60.1993137 | 2.02804561 | 1786.92104 |
| cg25996566 | 0.0098279  | 253559140  | 105.734895 | 6.0805E+14 | cg10718721 | 0.01785441 | 83574.758  | 7.0665561  | 988422095  |
| cg19936731 | 0.0098281  | 8440131.56 | 46.5882388 | 1.5291E+12 | cg25580656 | 0.0178548  | 39.5522564 | 1.88606259 | 829.442777 |
| cg20632873 | 0.00982819 | 1766.99276 | 6.05513479 | 515638.96  | cg01385168 | 0.01786316 | 74611.0296 | 6.92465675 | 803910711  |
| cg01730534 | 0.009831   | 46050.2227 | 13.2752734 | 159742324  | cg16177440 | 0.01787157 | 3185.32615 | 4.01759011 | 2525469.85 |
| cg12766383 | 0.00983928 | 32422901.1 | 64.2972897 | 1.635E+13  | cg02291466 | 0.01787514 | 1292833.75 | 11.3112452 | 1.4777E+11 |
| cg05256179 | 0.00984244 | 0.07181729 | 0.00972247 | 0.53049506 | cg23227500 | 0.01788701 | 184800.443 | 8.08024825 | 4226504248 |
| cg12876855 | 0.00984659 | 6983.18278 | 8.41671837 | 5793806.99 | cg09760422 | 0.01788833 | 14.2857403 | 1.58114807 | 129.072273 |
| cg01480708 | 0.00985648 | 24.9038123 | 2.1671794  | 286.178368 | cg15949380 | 0.01789129 | 7282.21926 | 4.62730031 | 11460401.1 |
| cg13460740 | 0.00986643 | 53.9845379 | 2.60944705 | 1116.83827 | cg08460435 | 0.0178937  | 13.825358  | 1.5720894  | 121.583749 |
| cg00283344 | 0.00987068 | 0.00310857 | 3.87E-05   | 0.24955168 | cg01179696 | 0.01789412 | 16.7342798 | 1.62464316 | 172.367772 |



|            |            |            |            |            |            |            |            |            |            |
|------------|------------|------------|------------|------------|------------|------------|------------|------------|------------|
| cg11580511 | 0.00987078 | 70389.2272 | 14.6363882 | 338515433  | cg08026651 | 0.01790401 | 7.70244282 | 1.42119068 | 41.7450145 |
| cg17346426 | 0.00987165 | 84.9210171 | 2.90907608 | 2478.99297 | cg07868721 | 0.01791517 | 29.8785105 | 1.79430457 | 497.532806 |
| cg12566138 | 0.00987387 | 40.1461592 | 2.42938212 | 663.425519 | cg17836177 | 0.01791646 | 23.3288712 | 1.71945035 | 316.517562 |
| cg17617387 | 0.00988535 | 532.29079  | 4.51866165 | 62702.9653 | cg04195863 | 0.01791651 | 0.06782001 | 0.00730832 | 0.62935889 |
| cg13520520 | 0.00988594 | 22.8537125 | 2.12083711 | 246.266991 | cg21281951 | 0.01791946 | 8.60922458 | 1.44833838 | 51.1750216 |
| cg22370296 | 0.00988799 | 41252.1061 | 12.8476792 | 132454759  | cg06306636 | 0.01792684 | 191388.242 | 8.10075304 | 4521735088 |
| cg12561839 | 0.00988884 | 629776925  | 129.974699 | 3.0515E+15 | cg06051154 | 0.01793854 | 7117878    | 15.0685794 | 3.3622E+12 |
| cg26056577 | 0.00988923 | 47.2020655 | 2.52426306 | 882.647701 | cg02436004 | 0.01794181 | 7.8521748  | 1.42510768 | 43.2645546 |
| cg12756303 | 0.00990052 | 359740.48  | 21.5807636 | 5996692947 | cg27113548 | 0.01794366 | 0.12520311 | 0.02240459 | 0.69966992 |
| cg17980625 | 0.00990378 | 6.00949518 | 1.53809539 | 23.4797091 | cg06329345 | 0.01794471 | 523.868876 | 2.93341891 | 93555.8839 |
| cg04964562 | 0.00991489 | 8433805.11 | 45.9206586 | 1.549E+12  | cg10676604 | 0.01795541 | 42.8005127 | 1.90670675 | 960.758064 |
| cg05936800 | 0.0099152  | 14.5406855 | 1.90097664 | 111.222584 | cg01158447 | 0.01795756 | 5563.40808 | 4.39940233 | 7035389.6  |
| cg13441378 | 0.00991529 | 12.4935501 | 1.83299991 | 85.1548294 | cg23078565 | 0.01796022 | 2.0689E+10 | 59.1414134 | 7.2374E+18 |
| cg17468224 | 0.0099201  | 11399.1443 | 9.40357283 | 13818204.4 | cg04562491 | 0.01796083 | 50.3609753 | 1.96044309 | 1293.70133 |
| cg12774845 | 0.00992245 | 22250.3103 | 11.0375794 | 44853702.8 | cg02219997 | 0.017966   | 141.391138 | 2.34034296 | 8542.10439 |
| cg21787965 | 0.00992324 | 4.36127316 | 1.42373908 | 13.3596836 | cg14188862 | 0.01796845 | 62.0775473 | 2.03169522 | 1896.75196 |
| cg04755365 | 0.00992985 | 25.6000952 | 2.17627338 | 301.140876 | cg23687994 | 0.01796875 | 49883.7839 | 6.40708292 | 388381410  |
| cg08276690 | 0.00993313 | 4135736320 | 202.228531 | 8.4579E+16 | cg04916289 | 0.01798319 | 18.7315865 | 1.65338573 | 212.214442 |
| cg19044630 | 0.009936   | 25.4060166 | 2.17186192 | 297.19462  | cg14155825 | 0.01798691 | 691427.198 | 10.0448943 | 4.7593E+10 |
| cg06541501 | 0.00993798 | 56.4150931 | 2.62941861 | 1210.40549 | cg22997194 | 0.01799695 | 167606.695 | 7.86994492 | 3569529947 |
| cg23585979 | 0.00993811 | 16.0872665 | 1.94637661 | 132.965092 | cg12416067 | 0.01800226 | 33300906.8 | 19.4904499 | 5.6897E+13 |
| cg27576259 | 0.00994364 | 20.7283004 | 2.06795812 | 207.771343 | cg24577137 | 0.01800596 | 1799.82815 | 3.61463507 | 896184.903 |
| cg09578353 | 0.00994542 | 32.0929723 | 2.29622752 | 448.54391  | cg27359972 | 0.01800864 | 27582122.8 | 18.8559984 | 4.0346E+13 |
| cg23693200 | 0.00994583 | 325.313847 | 4.00008206 | 26456.732  | cg18558763 | 0.01801654 | 4008405.16 | 13.5358431 | 1.187E+12  |
| cg25339705 | 0.00994742 | 3.0393E+11 | 564.467363 | 1.64E+20   | cg25355065 | 0.01802536 | 3005.76398 | 3.94240771 | 2291649.61 |
| cg22806837 | 0.0099502  | 6.88818697 | 1.58786247 | 29.8811268 | cg14673936 | 0.01802539 | 18.9138245 | 1.65465529 | 216.197755 |
| cg16195332 | 0.0099566  | 8.36706203 | 1.66337897 | 42.0876591 | cg04356968 | 0.01802715 | 8641.81393 | 4.72363055 | 15810073.9 |
| cg27110054 | 0.00996125 | 8.80553345 | 1.68368092 | 46.052324  | cg21236153 | 0.01803266 | 14.1851427 | 1.57486952 | 127.768219 |
| cg11685394 | 0.00996234 | 8258.81914 | 8.67002083 | 7867119.92 | cg02131049 | 0.01803553 | 2.8278E+12 | 135.511615 | 5.90E+22   |
| cg22052291 | 0.00996623 | 51.1849841 | 2.56587752 | 1021.05521 | cg13707337 | 0.018045   | 17.9652433 | 1.63946714 | 196.862724 |

|            |            |            |            |            |            |            |            |            |            |
|------------|------------|------------|------------|------------|------------|------------|------------|------------|------------|
| cg04122324 | 0.00997009 | 10157.0539 | 9.10373068 | 11332249.2 | cg10535858 | 0.01804625 | 3541664.84 | 13.2090583 | 9.4961E+11 |
| cg00168835 | 0.00997139 | 13.2981401 | 1.85789172 | 95.1834425 | cg24994173 | 0.01804827 | 6.01646621 | 1.35947106 | 26.6264334 |
| cg17371020 | 0.00997595 | 28.9986485 | 2.23874823 | 375.621342 | cg23305408 | 0.01805255 | 9.24879652 | 1.4631809  | 58.4618328 |
| cg15852352 | 0.00997939 | 0.21211372 | 0.06520678 | 0.68999316 | cg26831488 | 0.01806118 | 25152.3221 | 5.65808448 | 111811570  |
| cg01108370 | 0.00998641 | 15.8350097 | 1.9363689  | 129.493679 | cg22617213 | 0.0180649  | 92.6608292 | 2.16951657 | 3957.57717 |
| cg19893178 | 0.00998665 | 8.79326398 | 1.68216818 | 45.9653751 | cg20660171 | 0.01806582 | 277.601483 | 2.61720895 | 29444.5666 |
| cg01787574 | 0.00998764 | 6.89617069 | 1.58712827 | 29.9642891 | cg05867645 | 0.01806651 | 183639616  | 25.890595  | 1.3025E+15 |
| cg21149764 | 0.00999224 | 668996.544 | 24.7335095 | 1.8095E+10 | cg01522296 | 0.01806713 | 52.5230762 | 1.96867019 | 1401.28781 |
| cg05412137 | 0.0099949  | 6.27480114 | 1.55146837 | 25.3779774 | cg17621140 | 0.01806809 | 16988672.5 | 17.229727  | 1.6751E+13 |
| cg02819335 | 0.00999635 | 5.97601193 | 1.53343107 | 23.2894189 | cg07073662 | 0.01806865 | 1694078.66 | 11.6159516 | 2.4707E+11 |
| cg14973383 | 0.0099997  | 37901.0844 | 12.4377622 | 115494425  | cg20461826 | 0.01807171 | 111.552981 | 2.2389466  | 5558.00105 |
| cg17213699 | 0.01000544 | 5.29253885 | 1.48930457 | 18.8080853 | cg26797270 | 0.01807915 | 2.70E-06   | 6.51E-11   | 0.11173415 |
| cg12631255 | 0.01000656 | 2515098.9  | 33.8770567 | 1.8673E+11 | cg22188058 | 0.01808067 | 1822.04608 | 3.60765676 | 920223.883 |
| cg27529930 | 0.01000808 | 6.44093673 | 1.56080297 | 26.5796944 | cg04466840 | 0.0180812  | 4.96216983 | 1.31488177 | 18.7264969 |
| cg01578996 | 0.01000907 | 1.0519E+14 | 2245.27771 | 4.93E+24   | cg16704739 | 0.018093   | 21.8474363 | 1.69349165 | 281.849912 |
| cg03830181 | 0.01000911 | 11.7892276 | 1.80337485 | 77.0698829 | cg10305299 | 0.01810958 | 0.15619033 | 0.03349225 | 0.72839006 |
| cg08187418 | 0.01001002 | 75.3024036 | 2.80893485 | 2018.71965 | cg18098433 | 0.01814728 | 0.14097688 | 0.02775226 | 0.71613913 |
| cg24676409 | 0.01001682 | 2.9926E+12 | 956.76538  | 9.36E+21   | cg17246140 | 0.01816262 | 6.6035636  | 1.37916699 | 31.6183991 |
| cg15720535 | 0.0100244  | 11.266436  | 1.78325672 | 71.1802058 | cg13809748 | 0.0181661  | 250174905  | 26.9215275 | 2.3248E+15 |
| cg21684681 | 0.01002548 | 40034894.7 | 65.4214409 | 2.45E+13   | cg25212453 | 0.01818586 | 60.5991865 | 2.01037    | 1826.65947 |
| cg08593883 | 0.01002651 | 0.12369363 | 0.02520364 | 0.60705957 | cg16353899 | 0.01818814 | 232379.522 | 8.1834893  | 6598681864 |
| cg27430662 | 0.01002798 | 8.14166757 | 1.65000794 | 40.1735952 | cg25217365 | 0.01819264 | 4.99301615 | 1.31458401 | 18.964334  |
| cg27434072 | 0.01003124 | 5582896.67 | 40.8303036 | 7.6337E+11 | cg22663372 | 0.01819614 | 16.0466214 | 1.60324533 | 160.608021 |
| cg04765929 | 0.0100402  | 16112.1082 | 10.0967011 | 25711371   | cg21307628 | 0.01819816 | 28.673954  | 1.76951516 | 464.644584 |
| cg11279444 | 0.01004339 | 4.28169571 | 1.41493333 | 12.9567364 | cg00042409 | 0.0182135  | 21.7400289 | 1.68757115 | 280.06455  |
| cg04816394 | 0.01004525 | 10.3815919 | 1.74788769 | 61.6615422 | cg05350938 | 0.01821809 | 2484029.51 | 12.2073544 | 5.0547E+11 |
| cg05329798 | 0.01004916 | 149.119382 | 3.30057206 | 6737.19274 | cg25335229 | 0.01822293 | 1233.98246 | 3.35078949 | 454434.013 |
| cg06445343 | 0.01004961 | 20.5647078 | 2.057289   | 205.56529  | cg14262490 | 0.01822801 | 4.08E-11   | 9.68E-20   | 0.01719755 |
| cg00299943 | 0.01005047 | 4.33928074 | 1.41930153 | 13.2666364 | cg19865616 | 0.01822884 | 960.48666  | 3.21022317 | 287373.985 |
| cg15800776 | 0.01005295 | 693.450749 | 4.76141015 | 100994.018 | cg25198784 | 0.01823201 | 3412537.11 | 12.8648788 | 9.0521E+11 |

|            |            |            |            |            |
|------------|------------|------------|------------|------------|
| cg23096553 | 0.01005532 | 1356.45192 | 5.58691495 | 329334.138 |
| cg18675600 | 0.01006043 | 0.06475188 | 0.00805369 | 0.52060699 |
| cg01815671 | 0.01007098 | 5.50268086 | 1.50152007 | 20.1658953 |
| cg02447380 | 0.01007291 | 26.0310589 | 2.17462202 | 311.60175  |
| cg08325021 | 0.01007318 | 1.4471E+12 | 791.471564 | 2.65E+21   |
| cg14221831 | 0.01008005 | 127.144201 | 3.17254828 | 5095.47735 |
| cg08690336 | 0.0100817  | 144.214721 | 3.26895629 | 6362.24043 |
| cg12821132 | 0.01008456 | 122685.822 | 16.3048246 | 923150746  |
| cg14138132 | 0.01008588 | 483697366  | 117.174067 | 1.9967E+15 |
| cg05782110 | 0.01010293 | 7.4114E+12 | 1157.78362 | 4.74E+22   |
| cg17894889 | 0.01010391 | 7500329810 | 224.194137 | 2.5092E+17 |
| cg07166266 | 0.01011298 | 52.2360704 | 2.56318982 | 1064.53569 |
| cg10778862 | 0.01012445 | 128.974069 | 3.17640458 | 5236.83616 |
| cg14849065 | 0.01012645 | 16.4204766 | 1.94548421 | 138.593801 |
| cg14238081 | 0.0101278  | 1.7988E+15 | 4241.69032 | 7.63E+26   |
| cg00442646 | 0.01013047 | 26.4165336 | 2.17808435 | 320.388532 |
| cg07092593 | 0.0101549  | 3668.03293 | 7.02459994 | 1915335.49 |
| cg15447669 | 0.01015539 | 2148582.33 | 31.9136966 | 1.4465E+11 |
| cg00252032 | 0.01015699 | 291.929245 | 3.85033766 | 22133.8208 |
| cg15353612 | 0.01015844 | 48.7083692 | 2.51639037 | 942.820821 |
| cg08707078 | 0.01016574 | 22.8538137 | 2.10198657 | 248.477707 |
| cg22016779 | 0.01016586 | 70.2216103 | 2.74389628 | 1797.10676 |
| cg08496742 | 0.01016601 | 14.9638965 | 1.90091971 | 117.794663 |
| cg15311651 | 0.01016922 | 9.43808158 | 1.70377593 | 52.2823351 |
| cg08756712 | 0.01016943 | 24.0380383 | 2.12709712 | 271.650635 |
| cg07951301 | 0.01017368 | 13.2533546 | 1.84654914 | 95.1241445 |
| cg00353006 | 0.01017378 | 105.971353 | 3.02436901 | 3713.14731 |
| cg25876406 | 0.01017824 | 1.7976E+16 | 7193.98335 | 4.49E+28   |
| cg06970090 | 0.0101783  | 25.9010263 | 2.1644903  | 309.94048  |
| cg04943729 | 0.01018098 | 77651328.8 | 74.4702154 | 8.0968E+13 |

|            |            |            |            |            |
|------------|------------|------------|------------|------------|
| cg00242147 | 0.01823304 | 57.8919418 | 1.99206522 | 1682.41325 |
| cg20393324 | 0.01823386 | 5.73185092 | 1.34511291 | 24.4248008 |
| cg01079738 | 0.01823612 | 4092.14452 | 4.10442547 | 4079900.32 |
| cg02429905 | 0.01826189 | 7.58720501 | 1.41013883 | 40.8227039 |
| cg23044079 | 0.01826309 | 36.1037626 | 1.83716215 | 709.508233 |
| cg19803052 | 0.01826393 | 7.48083113 | 1.40672487 | 39.7823593 |
| cg23011817 | 0.01827744 | 4394298.96 | 13.3627548 | 1.4451E+12 |
| cg05496363 | 0.01827956 | 8.3114823  | 1.43173069 | 48.249813  |
| cg00321850 | 0.0182851  | 600.335018 | 2.95634267 | 121908.105 |
| cg25098174 | 0.01828744 | 29.0500986 | 1.7696313  | 476.883648 |
| cg13389876 | 0.01828752 | 999763.708 | 10.3868591 | 9.623E+10  |
| cg19039291 | 0.01828901 | 10622.1474 | 4.80911818 | 23461684.7 |
| cg14240820 | 0.01829194 | 0.11000149 | 0.01758612 | 0.68806109 |
| cg09797971 | 0.0183077  | 105.072859 | 2.19878839 | 5021.08605 |
| cg23114616 | 0.01830874 | 9.53565984 | 1.46477277 | 62.0770747 |
| cg24521848 | 0.01831001 | 9.13844686 | 1.45423225 | 57.4263232 |
| cg27310963 | 0.01831687 | 189.044804 | 2.42779308 | 14720.3393 |
| cg01904183 | 0.01831725 | 39.8303672 | 1.8653648  | 850.481444 |
| cg09240001 | 0.01832846 | 8.10272091 | 1.4245313  | 46.0882019 |
| cg24630566 | 0.01834155 | 767.646403 | 3.07385158 | 191707.695 |
| cg13239297 | 0.01834352 | 34422.6257 | 5.84528018 | 202713492  |
| cg06946814 | 0.0183576  | 27.3106892 | 1.74832063 | 426.622971 |
| cg15718811 | 0.01836159 | 29.945502  | 1.77556081 | 505.042171 |
| cg27455017 | 0.01836182 | 10.3055858 | 1.48284158 | 71.6226866 |
| cg11775521 | 0.01837083 | 5.71945541 | 1.34232817 | 24.3697263 |
| cg22777668 | 0.01837102 | 46.2493453 | 1.91031743 | 1119.71021 |
| cg09170903 | 0.01837439 | 337.214594 | 2.67118589 | 42570.4863 |
| cg21545902 | 0.01837609 | 7.66183236 | 1.41014047 | 41.6296647 |
| cg22715945 | 0.01837812 | 596.592809 | 2.94071859 | 121032.656 |
| cg03665761 | 0.01838679 | 11.8175234 | 1.51685828 | 92.067836  |

|            |            |            |            |            |            |            |            |            |            |
|------------|------------|------------|------------|------------|------------|------------|------------|------------|------------|
| cg07554231 | 0.01018346 | 117001.092 | 15.9341808 | 859112602  | cg00594128 | 0.01838977 | 7.92085764 | 1.41779031 | 44.2519498 |
| cg13983182 | 0.01018404 | 15.9874552 | 1.93003967 | 132.43185  | cg08572782 | 0.01839188 | 1137199.58 | 10.5064394 | 1.2309E+11 |
| cg18490616 | 0.01018636 | 10.532252  | 1.74800805 | 63.4598519 | cg24341452 | 0.01839214 | 14.34147   | 1.56705368 | 131.251255 |
| cg19336497 | 0.01018647 | 21.0372152 | 2.05974313 | 214.86389  | cg16752778 | 0.01839277 | 10997.8906 | 4.80434119 | 25175896.7 |
| cg11974722 | 0.01018752 | 179.544217 | 3.4250431  | 9411.88913 | cg13725062 | 0.01839838 | 0.00423229 | 4.50E-05   | 0.39790319 |
| cg00293996 | 0.01018761 | 38.3656926 | 2.37516241 | 619.716091 | cg13164831 | 0.01840406 | 0.03454497 | 0.00210464 | 0.56701147 |
| cg10631694 | 0.01019792 | 2337915545 | 166.419969 | 3.2844E+16 | cg18711066 | 0.01840419 | 23.9543503 | 1.70822033 | 335.911528 |
| cg03746823 | 0.01019852 | 7.4197424  | 1.60823888 | 34.231592  | cg00577560 | 0.01840484 | 19.6769709 | 1.65248063 | 234.304219 |
| cg01805784 | 0.01019963 | 303984283  | 102.566957 | 9.0094E+14 | cg19217955 | 0.01840923 | 11327.3217 | 4.82303986 | 26603184   |
| cg27456945 | 0.01020341 | 12.0265769 | 1.80312264 | 80.2155924 | cg14860524 | 0.01841249 | 33.8715846 | 1.81057884 | 633.656054 |
| cg00481884 | 0.01020582 | 63.8044915 | 2.67768002 | 1520.35087 | cg05022059 | 0.01841601 | 10.6930747 | 1.49075073 | 76.7008491 |
| cg04260516 | 0.01022185 | 593739.354 | 23.3043764 | 1.5127E+10 | cg05703009 | 0.01841718 | 0.12748905 | 0.02299679 | 0.7067707  |
| cg04769618 | 0.01022411 | 17.0307926 | 1.95695888 | 148.213588 | cg19019038 | 0.01842429 | 58080.7593 | 6.34548102 | 531618421  |
| cg17621140 | 0.01022478 | 2800209.89 | 33.6343863 | 2.3313E+11 | cg27634164 | 0.01842489 | 0.08981842 | 0.01210665 | 0.66635687 |
| cg11330839 | 0.01022571 | 44770.2427 | 12.6291685 | 158709944  | cg16556677 | 0.01843301 | 40.9848406 | 1.86867582 | 898.902392 |
| cg14011140 | 0.01022578 | 982093.681 | 26.2400028 | 3.6757E+10 | cg26929355 | 0.01843835 | 115.615817 | 2.22481125 | 6008.15789 |
| cg22945387 | 0.01022971 | 249.49493  | 3.69435236 | 16849.427  | cg11797365 | 0.01844817 | 133.009544 | 2.27714799 | 7769.16521 |
| cg06088623 | 0.01023934 | 122.910617 | 3.12275004 | 4837.72944 | cg02184697 | 0.0184547  | 12.5761389 | 1.53099094 | 103.305165 |
| cg00813746 | 0.01024108 | 5.24281189 | 1.48007811 | 18.5713689 | cg21139076 | 0.01845795 | 11735272.8 | 15.4564827 | 8.91E+12   |
| cg22967612 | 0.01024109 | 45843470.5 | 65.0186818 | 3.2323E+13 | cg00742040 | 0.01845801 | 13.1741956 | 1.54291005 | 112.488366 |
| cg23591609 | 0.01024204 | 12.7941874 | 1.82794647 | 89.5492477 | cg11913218 | 0.0184659  | 132150.877 | 7.26257219 | 2404637621 |
| cg00786685 | 0.01024256 | 18.783084  | 2.0017852  | 176.244806 | cg04674143 | 0.01847128 | 56193.3386 | 6.28726832 | 502235810  |
| cg13982688 | 0.01024676 | 2556.27589 | 6.40051019 | 1020941.49 | cg03039008 | 0.01847704 | 89229783.8 | 21.6881348 | 3.6711E+14 |
| cg11751707 | 0.01024714 | 5.70913759 | 1.51006633 | 21.5846492 | cg01052103 | 0.01847872 | 83.9547357 | 2.10545768 | 3347.67957 |
| cg14423778 | 0.01024899 | 7.37579148 | 1.60434432 | 33.9093668 | cg17892539 | 0.01849639 | 199164.316 | 7.76063825 | 5111232272 |
| cg16066237 | 0.01025186 | 900764.322 | 25.6159741 | 3.1675E+10 | cg14227687 | 0.01852271 | 5.383E+14  | 295.824688 | 9.80E+26   |
| cg24646841 | 0.01025239 | 0.18514187 | 0.05108234 | 0.67102479 | cg11209279 | 0.01852326 | 3.6705E+10 | 59.1728877 | 2.2768E+19 |
| cg18427465 | 0.0102552  | 97.9813131 | 2.9574718  | 3246.12992 | cg12059258 | 0.01852364 | 0.15982268 | 0.0347421  | 0.73522588 |
| cg10235181 | 0.01025581 | 0.11277751 | 0.0213106  | 0.59682805 | cg05564117 | 0.01852445 | 24.9021616 | 1.71471695 | 361.644324 |
| cg14722070 | 0.01025619 | 31595.5354 | 11.5918056 | 86119271.4 | cg22290047 | 0.01852748 | 10639561.6 | 15.0828436 | 7.5052E+12 |

|            |            |            |            |            |            |            |            |            |            |
|------------|------------|------------|------------|------------|------------|------------|------------|------------|------------|
| cg15970621 | 0.01027032 | 762.062419 | 4.79926462 | 121005.858 | cg20863668 | 0.01852951 | 487809.219 | 8.99275388 | 2.6461E+10 |
| cg01447966 | 0.01027306 | 2.2562E+14 | 2466.64029 | 2.06E+25   | cg11139684 | 0.01853578 | 2657094.64 | 11.9414562 | 5.9123E+11 |
| cg02899870 | 0.01028238 | 8.78673804 | 1.67095452 | 46.2051865 | cg00532413 | 0.01854879 | 21.8054528 | 1.67605464 | 283.688706 |
| cg00252616 | 0.01029067 | 0.0060027  | 0.0001206  | 0.29878139 | cg05875017 | 0.01855312 | 16.205379  | 1.59460004 | 164.689766 |
| cg05184938 | 0.01029071 | 8.75488805 | 1.66921895 | 45.9185207 | cg13459498 | 0.01856073 | 5.3601462  | 1.32470204 | 21.6887771 |
| cg05250768 | 0.01029971 | 4.14736126 | 1.39904469 | 12.2945361 | cg14325123 | 0.01856856 | 345.104915 | 2.66011514 | 44771.5217 |
| cg07806866 | 0.01030283 | 2.7218E+11 | 499.991805 | 1.48E+20   | cg21187108 | 0.01857165 | 92.5999387 | 2.13404835 | 4018.06673 |
| cg02154252 | 0.01030399 | 13.5034033 | 1.84843659 | 98.6465543 | cg19245228 | 0.01857281 | 31487.9901 | 5.66158498 | 175126492  |
| cg15949380 | 0.01030814 | 4778.86217 | 7.38299371 | 3093260.61 | cg20070464 | 0.01857289 | 1984.11261 | 3.56429109 | 1104484.1  |
| cg09806575 | 0.01030842 | 124097.32  | 15.921793  | 967236842  | cg22960945 | 0.01857548 | 14.7458068 | 1.56891586 | 138.591765 |
| cg06117133 | 0.01031216 | 252353.616 | 18.8159975 | 3384478942 | cg15702823 | 0.01857889 | 613077.659 | 9.30068791 | 4.0413E+10 |
| cg21101743 | 0.01031294 | 7.33187541 | 1.60003121 | 33.5970928 | cg04645049 | 0.01858367 | 26485.8905 | 5.49569008 | 127645916  |
| cg04665046 | 0.01031303 | 209.534933 | 3.52896345 | 12441.2987 | cg06980169 | 0.01859204 | 9.33710653 | 1.45301609 | 60.000408  |
| cg27275781 | 0.01031652 | 240509761  | 94.8512964 | 6.0985E+14 | cg22448889 | 0.01860738 | 5.49543752 | 1.32949573 | 22.7152543 |
| cg23332610 | 0.01032078 | 0.06722369 | 0.00854226 | 0.52901964 | cg20716058 | 0.01861817 | 16.066944  | 1.59027594 | 162.328237 |
| cg13873920 | 0.01032242 | 4.0838E+11 | 547.358147 | 3.05E+20   | cg14893163 | 0.01863273 | 16.0612378 | 1.58972725 | 162.268942 |
| cg01410292 | 0.01032287 | 13261.1536 | 9.38041485 | 18747379.3 | cg17161421 | 0.01863601 | 8.230169   | 1.42173867 | 47.6428498 |
| cg15516684 | 0.01032622 | 1981613.27 | 30.5355334 | 1.286E+11  | cg26484001 | 0.0186387  | 19.4539091 | 1.64121073 | 230.59475  |
| cg21724798 | 0.01033004 | 9.15785807 | 1.68558014 | 49.7551924 | cg09268877 | 0.01864043 | 2.7356E+16 | 554.007149 | 1.35E+30   |
| cg20019163 | 0.01033086 | 84.207567  | 2.8437979  | 2493.46634 | cg12085570 | 0.01864416 | 10.5637585 | 1.48203655 | 75.2970596 |
| cg06378498 | 0.0103337  | 119320.291 | 15.7283572 | 905201463  | cg02837212 | 0.01864521 | 306.432874 | 2.59962753 | 36120.9848 |
| cg12529006 | 0.01033789 | 12752.1117 | 9.28102563 | 17521377.4 | cg23244095 | 0.01865805 | 56.456201  | 1.95957038 | 1626.53134 |
| cg17924650 | 0.01034663 | 77.6182857 | 2.7877769  | 2161.07619 | cg00295485 | 0.01866867 | 10.9581314 | 1.49051195 | 80.5633557 |
| cg21857375 | 0.01035094 | 3.18E-07   | 3.43E-12   | 0.0294767  | cg09684870 | 0.0186758  | 1239.01714 | 3.27713381 | 468446.99  |
| cg06251289 | 0.0103574  | 20.4599159 | 2.03561494 | 205.642115 | cg00518698 | 0.01868352 | 1.5251E+10 | 49.7277993 | 4.6772E+18 |
| cg14925616 | 0.01035782 | 28.140779  | 2.19425925 | 360.897849 | cg02000318 | 0.0186851  | 9.06786328 | 1.44382837 | 56.9500825 |
| cg12648523 | 0.01036116 | 224.062849 | 3.5758884  | 14039.6329 | cg00731062 | 0.01870182 | 0.10339214 | 0.01559697 | 0.68538523 |
| cg16704739 | 0.01036348 | 20.0632942 | 2.02588389 | 198.696369 | cg18490616 | 0.018704   | 11.5792503 | 1.50335664 | 89.1864473 |
| cg13818424 | 0.01036478 | 5.18301781 | 1.47305659 | 18.2366881 | cg08641278 | 0.01870548 | 10.7310204 | 1.48440191 | 77.5765634 |
| cg20664468 | 0.0103804  | 19707058.6 | 52.0096774 | 7.4672E+12 | cg15884014 | 0.01871348 | 0.20286664 | 0.05366583 | 0.76687294 |

|            |            |            |            |            |            |            |            |            |            |
|------------|------------|------------|------------|------------|------------|------------|------------|------------|------------|
| cg21938523 | 0.01038952 | 3881035.37 | 35.4382547 | 4.2503E+11 | cg00207534 | 0.01871885 | 6252.46973 | 4.28055327 | 9132786.16 |
| cg16058797 | 0.01039051 | 7.48797223 | 1.60549464 | 34.923647  | cg04707408 | 0.01873095 | 9.99387727 | 1.46631573 | 68.1146501 |
| cg17903246 | 0.01039239 | 365173.894 | 20.3203587 | 6562481248 | cg00700324 | 0.01873139 | 14450.9562 | 4.91654987 | 42474934.6 |
| cg04111611 | 0.01039331 | 684.264961 | 4.6412045  | 100882.979 | cg03465285 | 0.01873349 | 13249.5606 | 4.84542481 | 36230230   |
| cg24430419 | 0.01039336 | 7.05891362 | 1.58328339 | 31.4714737 | cg08535309 | 0.01873741 | 2315607.28 | 11.4281027 | 4.692E+11  |
| cg12748367 | 0.01039747 | 9104.13967 | 8.52609269 | 9721376.73 | cg14722070 | 0.01874663 | 148665.816 | 7.23471016 | 3054928854 |
| cg02919799 | 0.01039775 | 53.1405603 | 2.54456516 | 1109.78457 | cg24867524 | 0.01874843 | 8.94832741 | 1.43923125 | 55.6356481 |
| cg27323088 | 0.01040086 | 144495.186 | 16.3237352 | 1279049103 | cg17313042 | 0.0187579  | 401.307485 | 2.70639145 | 59506.4317 |
| cg17345480 | 0.01040305 | 111.633363 | 3.02891934 | 4114.34122 | cg24577417 | 0.01876718 | 0.11992686 | 0.02045258 | 0.70320963 |
| cg08066497 | 0.01040442 | 13275869.5 | 47.2082075 | 3.7334E+12 | cg15689224 | 0.01876751 | 629.811325 | 2.91547269 | 136054.2   |
| cg00313981 | 0.01040487 | 1147.9506  | 5.23733638 | 251614.653 | cg26874634 | 0.01877027 | 17.7969193 | 1.61268983 | 196.398793 |
| cg19622675 | 0.0104066  | 94.772321  | 2.91409946 | 3082.18472 | cg21538450 | 0.0187864  | 10.568812  | 1.47865513 | 75.5414737 |
| cg27187881 | 0.0104108  | 2496.53917 | 6.28355315 | 991908.191 | cg00023464 | 0.01880522 | 0.04215364 | 0.00300333 | 0.59165393 |
| cg11955344 | 0.01041287 | 28210832   | 56.2760076 | 1.4142E+13 | cg08199013 | 0.01880704 | 452.413278 | 2.75497972 | 74293.7501 |
| cg06285333 | 0.01041515 | 159.908992 | 3.29385798 | 7763.20226 | cg11466815 | 0.01881751 | 515363212  | 27.7505803 | 9.5709E+15 |
| cg15387598 | 0.01042073 | 433.961988 | 4.16302285 | 45237.0824 | cg15628562 | 0.01882192 | 647.283787 | 2.92150303 | 143411.216 |
| cg26393255 | 0.01042129 | 1509.24984 | 5.57851317 | 408322.975 | cg17868052 | 0.01882322 | 124.238787 | 2.2225739  | 6944.77527 |
| cg27111250 | 0.01042665 | 9.42712828 | 1.69346737 | 52.4785711 | cg21748136 | 0.01882599 | 13.248907  | 1.53403918 | 114.425719 |
| cg11353547 | 0.01042989 | 7.34396578 | 1.59693019 | 33.7734447 | cg12291552 | 0.01883541 | 3458.85598 | 3.85322217 | 3104852.04 |
| cg03236184 | 0.01043319 | 411.086994 | 4.10734905 | 41143.9384 | cg14301212 | 0.01883989 | 18.5722859 | 1.62182561 | 212.679959 |
| cg15658676 | 0.01043632 | 41.8986633 | 2.40283587 | 730.594214 | cg26555401 | 0.01885408 | 83.5402221 | 2.07918309 | 3356.5917  |
| cg23666491 | 0.01043692 | 265.359644 | 3.70552806 | 19002.8896 | cg22986077 | 0.01885635 | 21.2450352 | 1.65773425 | 272.270132 |
| cg19828022 | 0.01043997 | 16866241.8 | 49.6467204 | 5.7299E+12 | cg25148255 | 0.01886087 | 1.1495E+11 | 67.4443027 | 1.96E+20   |
| cg14071762 | 0.01044395 | 904079035  | 126.272161 | 6.473E+15  | cg13418419 | 0.01886302 | 4.6174E+10 | 57.9807549 | 3.68E+19   |
| cg26123920 | 0.01044687 | 16228.5319 | 9.72062869 | 27093437.7 | cg19044674 | 0.01886517 | 2.72E-11   | 4.14E-20   | 0.01792027 |
| cg21236315 | 0.010457   | 10.6661897 | 1.74204115 | 65.3070692 | cg00134776 | 0.01887204 | 10.2916586 | 1.47008796 | 72.0489119 |
| cg08464513 | 0.01045749 | 10.557063  | 1.73782543 | 64.1327823 | cg19160353 | 0.01887438 | 832468.719 | 9.5152434  | 7.2831E+10 |
| cg09024228 | 0.0104607  | 61.745235  | 2.62914044 | 1450.08383 | cg19893185 | 0.01888122 | 14.1045322 | 1.54843042 | 128.477087 |
| cg12803617 | 0.01046481 | 78.4257901 | 2.78026164 | 2212.23948 | cg20410173 | 0.01889625 | 366663.129 | 8.29307886 | 1.6211E+10 |
| cg08468991 | 0.01046526 | 876636968  | 124.81676  | 6.157E+15  | cg19406914 | 0.01890399 | 593276.539 | 8.97240439 | 3.9229E+10 |

|            |            |            |            |            |            |            |            |            |            |
|------------|------------|------------|------------|------------|------------|------------|------------|------------|------------|
| cg01012089 | 0.01047464 | 159.135857 | 3.28025917 | 7720.18907 | cg11521979 | 0.01890633 | 13.9476992 | 1.54485555 | 125.926538 |
| cg20227763 | 0.01047653 | 70366.3908 | 13.6685188 | 362250587  | cg16071118 | 0.01890874 | 110.225244 | 2.17281218 | 5591.64962 |
| cg04042828 | 0.01047886 | 18.0582906 | 1.96972707 | 165.556876 | cg21551185 | 0.01891009 | 43.143515  | 1.86115381 | 1000.11234 |
| cg25755283 | 0.01048005 | 6.62894851 | 1.5575179  | 28.2134531 | cg04383058 | 0.01891165 | 17.9984566 | 1.6110772  | 201.073196 |
| cg19430489 | 0.01048044 | 4.75207709 | 1.44067232 | 15.6747904 | cg02448276 | 0.01892141 | 295.693295 | 2.5557884  | 34210.3926 |
| cg14123048 | 0.01049645 | 1299.37092 | 5.3570054  | 315169.512 | cg14347989 | 0.018922   | 85.6212189 | 2.08324209 | 3519.03083 |
| cg02774160 | 0.01049819 | 8.34912332 | 1.64338512 | 42.4172395 | cg13606421 | 0.01892369 | 18.7771358 | 1.62197432 | 217.377565 |
| cg15219933 | 0.01049889 | 288.629099 | 3.76620385 | 22119.556  | cg10273340 | 0.01892979 | 5.07305333 | 1.30701696 | 19.6905403 |
| cg10088527 | 0.01049899 | 5.3048E+10 | 323.86584  | 8.6892E+18 | cg02947424 | 0.01894825 | 298802692  | 24.9047809 | 3.585E+15  |
| cg06020661 | 0.01050166 | 233.496993 | 3.58335693 | 15215.0195 | cg01447579 | 0.01895678 | 762.661117 | 2.9831805  | 194977.132 |
| cg20351640 | 0.01050232 | 189.010677 | 3.41028606 | 10475.6714 | cg08169325 | 0.01895881 | 10.2048302 | 1.46595888 | 71.0378444 |
| cg24546680 | 0.01050239 | 385199747  | 102.186981 | 1.452E+15  | cg07099627 | 0.01895926 | 31328.52   | 5.49971294 | 178459526  |
| cg03880683 | 0.01050609 | 1213546.03 | 26.5271468 | 5.5516E+10 | cg06080729 | 0.01896127 | 0.07624396 | 0.00888098 | 0.65456094 |
| cg11961288 | 0.01050768 | 3746923704 | 173.829388 | 8.0766E+16 | cg23967249 | 0.01896742 | 1.0815E+18 | 930.271969 | 1.26E+33   |
| cg09250423 | 0.01051224 | 7.29149377 | 1.59165722 | 33.4028463 | cg25464921 | 0.01897774 | 3.86646622 | 1.24921241 | 11.9671891 |
| cg27045999 | 0.01051525 | 10.3245718 | 1.72646464 | 61.7428123 | cg20473595 | 0.01898546 | 14.1790414 | 1.54678165 | 129.976469 |
| cg08090734 | 0.01052341 | 1.6652E+10 | 245.530858 | 1.1294E+18 | cg07666840 | 0.01900709 | 79.9237606 | 2.05435074 | 3109.40454 |
| cg24542751 | 0.01052367 | 3.86825804 | 1.37207675 | 10.9056729 | cg06709324 | 0.01901765 | 114667438  | 21.0788208 | 6.2378E+14 |
| cg20041105 | 0.01053171 | 14.7960064 | 1.87724597 | 116.618605 | cg07562079 | 0.0190378  | 975385295  | 29.8744613 | 3.1846E+16 |
| cg26361892 | 0.01053327 | 320972736  | 97.3317411 | 1.0585E+15 | cg07619542 | 0.01904104 | 18072.43   | 4.99532211 | 65383716.6 |
| cg25373553 | 0.01053434 | 0.14343148 | 0.03238928 | 0.63516656 | cg05927190 | 0.01904587 | 5.53992146 | 1.32428552 | 23.1753117 |
| cg23149053 | 0.01053787 | 22.7363625 | 2.07515616 | 249.110015 | cg14611892 | 0.01904921 | 17696.5729 | 4.97534887 | 62944066.7 |
| cg10522115 | 0.01054936 | 14.8110388 | 1.87680853 | 116.882925 | cg06002947 | 0.01905391 | 9176520.02 | 13.8652896 | 6.0733E+12 |
| cg02133520 | 0.01055347 | 86222.6368 | 14.2114834 | 523122244  | cg22605924 | 0.01905878 | 24.1013639 | 1.68506912 | 344.719238 |
| cg21534486 | 0.01055422 | 9581440.02 | 42.6928429 | 2.1503E+12 | cg07447902 | 0.01906409 | 1.8726E+10 | 48.3088289 | 7.2591E+18 |
| cg04671541 | 0.01055966 | 12.7775569 | 1.81270209 | 90.0677291 | cg10743378 | 0.01906564 | 14.0668953 | 1.54247711 | 128.285562 |
| cg10667810 | 0.01056093 | 49.467323  | 2.48632205 | 984.191102 | cg04946916 | 0.01907782 | 1082958.82 | 9.74345051 | 1.2037E+11 |
| cg20546778 | 0.01056115 | 18.1881024 | 1.96837877 | 168.060677 | cg21325316 | 0.01907835 | 36590.9674 | 5.59303742 | 239386722  |
| cg10417218 | 0.01056261 | 43.1714331 | 2.40839445 | 773.865193 | cg06840154 | 0.01908214 | 26.5851399 | 1.71147444 | 412.959521 |
| cg02062409 | 0.01056362 | 14.8904166 | 1.87843851 | 118.036606 | cg06726474 | 0.0190825  | 881082.703 | 9.4154165  | 8.2451E+10 |

|            |            |            |            |            |            |            |            |            |            |
|------------|------------|------------|------------|------------|------------|------------|------------|------------|------------|
| cg14581165 | 0.01056386 | 8.07414978 | 1.628342   | 40.035751  | cg00727590 | 0.01908815 | 12.6522599 | 1.51530565 | 105.641843 |
| cg14287235 | 0.01057429 | 3.88147445 | 1.37224031 | 10.9790128 | cg00842549 | 0.01908815 | 10.4278897 | 1.46807523 | 74.0703751 |
| cg08189801 | 0.01057687 | 6.72969722 | 1.56017915 | 29.0279643 | cg21193251 | 0.01909889 | 1.4631E+11 | 67.2481124 | 3.18E+20   |
| cg20377627 | 0.01058026 | 498.415527 | 4.25861278 | 58333.0889 | cg02216011 | 0.0191053  | 62.6735914 | 1.96829742 | 1995.62272 |
| cg12906748 | 0.01058733 | 7.53469072 | 1.60151942 | 35.4485643 | cg16961545 | 0.01910891 | 146.552495 | 2.26155791 | 9496.83126 |
| cg02408311 | 0.01058778 | 0.15831871 | 0.03852392 | 0.65062982 | cg21762534 | 0.01911135 | 773.481398 | 2.96872208 | 201525.591 |
| cg24311704 | 0.0105913  | 16.32146   | 1.9176471  | 138.915057 | cg20770175 | 0.01911716 | 13.0337958 | 1.52190597 | 111.623081 |
| cg09963640 | 0.01059379 | 14.5564487 | 1.86702942 | 113.490551 | cg03316474 | 0.01913249 | 5177.85692 | 4.04680833 | 6625023.99 |
| cg20813965 | 0.01059582 | 166.736648 | 3.29604466 | 8434.68847 | cg26060255 | 0.01915305 | 36.4467769 | 1.79905449 | 738.369822 |
| cg11691181 | 0.01059782 | 38215825.9 | 58.532851  | 2.4951E+13 | cg08830818 | 0.0191542  | 118.066967 | 2.17969495 | 6395.30259 |
| cg26552774 | 0.01059814 | 0.0763574  | 0.01061947 | 0.54903401 | cg25591377 | 0.01915435 | 29.7688412 | 1.74050775 | 509.152519 |
| cg26570683 | 0.01059982 | 51.9848215 | 2.51149452 | 1076.02133 | cg09575314 | 0.01915612 | 725285.982 | 9.05714654 | 5.808E+10  |
| cg19751990 | 0.01060214 | 0.14292471 | 0.03214554 | 0.63546821 | cg04302492 | 0.01917156 | 261587.672 | 7.65750758 | 8936081296 |
| cg04704227 | 0.0106034  | 3.3465E+10 | 283.578165 | 3.9491E+18 | cg12508343 | 0.01919147 | 7.01604632 | 1.3738983  | 35.8286389 |
| cg22776392 | 0.01061071 | 7.33924953 | 1.59100322 | 33.8557353 | cg21701379 | 0.01919192 | 9.77807453 | 1.45029652 | 65.9249608 |
| cg23987137 | 0.01061812 | 7.52185616 | 1.59990334 | 35.3635864 | cg02746725 | 0.01921353 | 12.2875997 | 1.50476802 | 100.337796 |
| cg19439399 | 0.01062731 | 9.85568162 | 1.70348033 | 57.0211811 | cg09911554 | 0.01923155 | 213508664  | 22.687359  | 2.0093E+15 |
| cg16500874 | 0.0106286  | 0.00228502 | 2.15E-05   | 0.24275313 | cg26085197 | 0.01923346 | 329576.725 | 7.90839016 | 1.3735E+10 |
| cg02155796 | 0.01062953 | 40671101.3 | 59.0646472 | 2.8006E+13 | cg23414387 | 0.01923922 | 14.563752  | 1.54626817 | 137.17082  |
| cg02432159 | 0.01063703 | 2649895075 | 155.916477 | 4.5037E+16 | cg01748892 | 0.01924559 | 27.7784041 | 1.71732501 | 449.326557 |
| cg03262773 | 0.01063849 | 121.348735 | 3.05455984 | 4820.83054 | cg21174792 | 0.01924843 | 2.513E+11  | 71.4958764 | 8.83E+20   |
| cg18459239 | 0.01064081 | 1571.12494 | 5.5421172  | 445395.416 | cg12570246 | 0.01925915 | 0.12178002 | 0.02088422 | 0.71012332 |
| cg16905506 | 0.01064144 | 9.50958169 | 1.68883325 | 53.5471126 | cg17758623 | 0.01925955 | 1.7924E+10 | 46.4477137 | 6.9166E+18 |
| cg12578480 | 0.01065213 | 8178.62437 | 8.12725949 | 8230313.89 | cg26607758 | 0.01926521 | 4.46977786 | 1.27554432 | 15.6630498 |
| cg13374726 | 0.01065917 | 3674245.18 | 33.6016376 | 4.0177E+11 | cg27337492 | 0.01927202 | 47857.7657 | 5.76029481 | 397612590  |
| cg26861703 | 0.01065973 | 5.47609263 | 1.48486086 | 20.1955559 | cg16593646 | 0.01927379 | 4995.01502 | 3.98959929 | 6253804.76 |
| cg20666271 | 0.01066358 | 1.565E+10  | 234.273073 | 1.0455E+18 | cg05040724 | 0.01929983 | 0.03859299 | 0.00252594 | 0.58965027 |
| cg16429975 | 0.01066445 | 7.94972073 | 1.61912168 | 39.0323102 | cg06351970 | 0.01930489 | 8.3775E+10 | 59.2115702 | 1.19E+20   |
| cg02756939 | 0.01066493 | 179.558437 | 3.34165265 | 9648.28951 | cg13654525 | 0.01930885 | 36.1535517 | 1.7897233  | 730.324797 |
| cg13066963 | 0.0106656  | 15.2972871 | 1.88512746 | 124.133248 | cg03142071 | 0.0193096  | 0.05167937 | 0.00431889 | 0.61838975 |



|            |            |            |            |            |            |            |            |            |            |
|------------|------------|------------|------------|------------|------------|------------|------------|------------|------------|
| cg07273125 | 0.01067785 | 54.4655228 | 2.53115754 | 1171.99073 | cg00402172 | 0.01931619 | 7.73371759 | 1.39342012 | 42.923442  |
| cg06946814 | 0.01067934 | 22.8600971 | 2.06875075 | 252.608507 | cg05414908 | 0.01932229 | 16.9081876 | 1.58170474 | 180.746002 |
| cg10098888 | 0.01068658 | 49.5119889 | 2.47487822 | 990.528354 | cg17432022 | 0.01932561 | 134021.428 | 6.77968469 | 2649347871 |
| cg13997645 | 0.01068711 | 6.43990724 | 1.5411247  | 26.9104798 | cg18160072 | 0.01933565 | 16.6433176 | 1.57725031 | 175.622105 |
| cg25217313 | 0.01069668 | 374626.97  | 19.6687269 | 7135457611 | cg24296478 | 0.01933878 | 22.6530181 | 1.65793448 | 309.517195 |
| cg08561530 | 0.01069855 | 0.00010562 | 9.34E-08   | 0.11942001 | cg25804860 | 0.01934634 | 46.4019528 | 1.86181754 | 1156.47274 |
| cg00716257 | 0.01070374 | 9.14623092 | 1.67133195 | 50.0520198 | cg11625005 | 0.01935771 | 0.11531478 | 0.01886459 | 0.70489206 |
| cg15402162 | 0.01070761 | 14.1933464 | 1.85056937 | 108.858974 | cg00973653 | 0.01935982 | 6.976933   | 1.36953721 | 35.543097  |
| cg14489649 | 0.01071013 | 135344306  | 76.9922142 | 2.3792E+14 | cg09091185 | 0.01938325 | 0.0748474  | 0.00851964 | 0.65755525 |
| cg14581419 | 0.01071143 | 10.5870277 | 1.72873526 | 64.8365071 | cg24217704 | 0.01938974 | 1934326.71 | 10.3842127 | 3.6032E+11 |
| cg10622825 | 0.01071431 | 16264.1117 | 9.48000627 | 27903075.5 | cg26168907 | 0.01939493 | 7.87710338 | 1.39600747 | 44.4472963 |
| cg01394339 | 0.01071604 | 68.0715564 | 2.66152971 | 1741.00509 | cg01243251 | 0.01940294 | 1334.18422 | 3.19877522 | 556477.843 |
| cg13879483 | 0.01071694 | 4.2230624  | 1.39669063 | 12.768938  | cg00338116 | 0.01940584 | 11.2318757 | 1.47813743 | 85.3472949 |
| cg20691205 | 0.01072059 | 20.4366307 | 2.01313619 | 207.465286 | cg05030680 | 0.01940657 | 13.9631599 | 1.53102354 | 127.346072 |
| cg23526147 | 0.01072235 | 21.4900472 | 2.03662898 | 226.758104 | cg24963001 | 0.01941179 | 8.58984604 | 1.4153362  | 52.1328114 |
| cg11189425 | 0.0107234  | 199121289  | 83.9980456 | 4.7203E+14 | cg00658161 | 0.01942785 | 0.00726822 | 0.00011696 | 0.45165805 |
| cg01052103 | 0.01073296 | 99.7883036 | 2.90621825 | 3426.34471 | cg23095680 | 0.01943244 | 250.785422 | 2.43892935 | 25787.2693 |
| cg09745087 | 0.01073306 | 36.2834562 | 2.29875853 | 572.69573  | cg09769410 | 0.01943391 | 7.2062E+10 | 56.5073522 | 9.1898E+19 |
| cg15878616 | 0.0107338  | 0.05461063 | 0.00585068 | 0.50973922 | cg04164924 | 0.01944733 | 22.3694257 | 1.65070108 | 303.138595 |
| cg24634593 | 0.01073685 | 25.26321   | 2.11350168 | 301.977419 | cg01963221 | 0.01945422 | 1756304.65 | 10.1581384 | 3.0366E+11 |
| cg24716343 | 0.01074455 | 122068.868 | 15.0782242 | 988233648  | cg13263104 | 0.01948293 | 38733.6137 | 5.48058804 | 273746688  |
| cg04311355 | 0.01075333 | 1.0895E+14 | 1780.8291  | 6.67E+24   | cg13460057 | 0.01949192 | 26.7290125 | 1.69707453 | 420.983344 |
| cg25185881 | 0.01075701 | 67.5215194 | 2.65204761 | 1719.10774 | cg01036779 | 0.01949581 | 1128.32839 | 3.09932827 | 410774.48  |
| cg12456825 | 0.01076084 | 11.2746208 | 1.75210419 | 72.5510936 | cg16376036 | 0.01950344 | 197.761895 | 2.34113779 | 16705.4529 |
| cg19427757 | 0.01076194 | 1.1664E+10 | 213.967274 | 6.3579E+17 | cg11992375 | 0.01950399 | 12.3887382 | 1.49917838 | 102.376632 |
| cg01692674 | 0.01076227 | 8182.9394  | 8.04966047 | 8318425.04 | cg03844154 | 0.01951587 | 17.1633768 | 1.57953712 | 186.498626 |
| cg25972499 | 0.01076402 | 163949354  | 79.6961688 | 3.3727E+14 | cg07190921 | 0.01953773 | 52.7808125 | 1.89113698 | 1473.08957 |
| cg04165910 | 0.01076652 | 72632.0796 | 13.337495  | 395532968  | cg12019494 | 0.0195428  | 9.83754087 | 1.44369922 | 67.0341919 |
| cg11277662 | 0.01076921 | 0.02905369 | 0.00191445 | 0.44091931 | cg22555539 | 0.01954315 | 810965.597 | 8.89376326 | 7.3947E+10 |
| cg00558500 | 0.01077111 | 0.03039384 | 0.00207325 | 0.44557347 | cg00725244 | 0.01954351 | 118.249576 | 2.15239221 | 6496.47505 |

|            |            |            |            |            |            |            |            |            |            |
|------------|------------|------------|------------|------------|------------|------------|------------|------------|------------|
| cg25980157 | 0.01078096 | 8.6168E+17 | 14076.1084 | 5.27E+31   | cg13992236 | 0.01955051 | 1.0318E+10 | 40.5363239 | 2.6263E+18 |
| cg25420952 | 0.01078807 | 10.3843833 | 1.71798969 | 62.768373  | cg11043450 | 0.01955188 | 664.065241 | 2.83873692 | 155344.668 |
| cg20361909 | 0.01078884 | 6.92042859 | 1.56408389 | 30.6200532 | cg16601489 | 0.01955297 | 0.11796326 | 0.01961209 | 0.70952814 |
| cg13002957 | 0.01078899 | 18.1688387 | 1.95517863 | 168.837104 | cg07881273 | 0.01955939 | 5538253893 | 36.6320574 | 8.3731E+17 |
| cg23814388 | 0.01079073 | 9.7067E+11 | 590.871939 | 1.59E+21   | cg10361095 | 0.01956157 | 17.7205758 | 1.58623816 | 197.964475 |
| cg18634758 | 0.01079123 | 8.51238123 | 1.64070206 | 44.1644076 | cg08095637 | 0.01956956 | 11.9335367 | 1.48850966 | 95.672404  |
| cg09039561 | 0.01079321 | 7.73163204 | 1.60454883 | 37.2554159 | cg24616138 | 0.01957685 | 1715.61329 | 3.30181343 | 891428.01  |
| cg09904774 | 0.01079366 | 4305.84091 | 6.92014995 | 2679171.13 | cg09249682 | 0.01957775 | 414869.124 | 7.96166841 | 2.1618E+10 |
| cg10363578 | 0.0107969  | 6.0952E+10 | 311.111739 | 1.1942E+19 | cg00508024 | 0.0195806  | 0.02812832 | 0.00140275 | 0.56403468 |
| cg01298991 | 0.01080254 | 15.5730342 | 1.88602652 | 128.587479 | cg22935653 | 0.01958191 | 191.215467 | 2.3218969  | 15747.1913 |
| cg02595120 | 0.01080723 | 9.61781281 | 1.68708126 | 54.8297973 | cg01558492 | 0.01958779 | 3715.3362  | 3.73513128 | 3695646.03 |
| cg13195796 | 0.01080797 | 2823514435 | 152.581209 | 5.2249E+16 | cg03169018 | 0.0195891  | 9.89287188 | 1.44394626 | 67.7787789 |
| cg17878425 | 0.01081206 | 809.774264 | 4.69709722 | 139604.17  | cg04941721 | 0.0196078  | 23.9481152 | 1.66311071 | 344.843081 |
| cg20036915 | 0.01081615 | 3853.9638  | 6.73284875 | 2206055.34 | cg24292487 | 0.01961077 | 148.7906   | 2.22813917 | 9935.93356 |
| cg26875073 | 0.01082186 | 7.38628435 | 1.58680242 | 34.381846  | cg18158177 | 0.01961821 | 6.5773E+11 | 77.9972833 | 5.55E+21   |
| cg25123046 | 0.01082404 | 4372166.35 | 34.1367071 | 5.5998E+11 | cg26582085 | 0.01962971 | 0.05365867 | 0.00459796 | 0.62620213 |
| cg17373751 | 0.01083354 | 25.5509706 | 2.11259316 | 309.028784 | cg15597770 | 0.0196478  | 2760923.89 | 10.7129857 | 7.1154E+11 |
| cg04248364 | 0.01083695 | 0.01233309 | 0.00041941 | 0.36266141 | cg23378074 | 0.0196687  | 0.13362823 | 0.02462851 | 0.72503402 |
| cg12841566 | 0.01084043 | 422316.495 | 19.8593663 | 8980710661 | cg09987240 | 0.01968439 | 17.714378  | 1.58230913 | 198.317245 |
| cg21719787 | 0.01084683 | 2.3114E+10 | 245.777443 | 2.1737E+18 | cg25133212 | 0.01968572 | 793842.462 | 8.74621648 | 7.2052E+10 |
| cg12505694 | 0.01085343 | 1007626580 | 119.160992 | 8.5205E+15 | cg23048494 | 0.01970001 | 15.6709851 | 1.55119165 | 158.31685  |
| cg25707005 | 0.01085699 | 8627260.5  | 39.7330627 | 1.8732E+12 | cg18327128 | 0.01970275 | 0.16114859 | 0.03474698 | 0.74737045 |
| cg07221635 | 0.0108571  | 98.4722023 | 2.88125162 | 3365.47304 | cg11805463 | 0.01971678 | 0.05884276 | 0.00543911 | 0.63658787 |
| cg18661868 | 0.0108575  | 28.9181272 | 2.17211919 | 384.996405 | cg24237081 | 0.01971974 | 8.60016455 | 1.40917442 | 52.48664   |
| cg05488632 | 0.01085867 | 17.4173964 | 1.93243026 | 156.986622 | cg11032474 | 0.01972469 | 80.871977  | 2.01394355 | 3247.49751 |
| cg01759112 | 0.01085903 | 0.15336386 | 0.03623862 | 0.64904446 | cg00437134 | 0.01972663 | 8.6839E+11 | 79.8958275 | 9.44E+21   |
| cg20621021 | 0.01085911 | 263.428236 | 3.61463078 | 19198.2086 | cg01445100 | 0.01973406 | 79.4769441 | 2.00780306 | 3146.01804 |
| cg11359655 | 0.01085991 | 1.654E+10  | 226.839244 | 1.206E+18  | cg17030981 | 0.01973446 | 0.06400898 | 0.00634823 | 0.64540074 |
| cg27090985 | 0.01086334 | 6702554677 | 184.058676 | 2.4408E+17 | cg20265748 | 0.01974737 | 10.6293113 | 1.45691969 | 77.5487218 |
| cg06381959 | 0.01086603 | 47.8574222 | 2.43885423 | 939.101989 | cg20945738 | 0.01975569 | 20.2211339 | 1.61372789 | 253.384887 |

|            |            |            |            |            |            |            |            |            |            |
|------------|------------|------------|------------|------------|------------|------------|------------|------------|------------|
| cg19593490 | 0.01086723 | 9.84426374 | 1.69391682 | 57.2103232 | cg08568550 | 0.0197727  | 8.04170598 | 1.39312062 | 46.4202698 |
| cg18853219 | 0.01087429 | 3789.92195 | 6.67570286 | 2151609.9  | cg03436149 | 0.01978143 | 441473.347 | 7.89663401 | 2.4681E+10 |
| cg25464815 | 0.01087662 | 8327843.56 | 39.2913239 | 1.7651E+12 | cg20265062 | 0.01978601 | 17.2670546 | 1.57274214 | 189.5741   |
| cg05442902 | 0.01087706 | 44.1815935 | 2.39337321 | 815.590814 | cg10476085 | 0.0197898  | 39.0026123 | 1.79005065 | 849.810463 |
| cg20569452 | 0.01088083 | 7.48042082 | 1.58961672 | 35.201376  | cg17850838 | 0.01979458 | 6582.39408 | 4.04309269 | 10716526.9 |
| cg15844609 | 0.01089195 | 416.528396 | 4.00962217 | 43269.8886 | cg23253991 | 0.01980432 | 410.216573 | 2.60024998 | 64715.9458 |
| cg22913585 | 0.01089286 | 0.00073525 | 2.85E-06   | 0.18993612 | cg01493678 | 0.01981191 | 12.4184617 | 1.49179769 | 103.377417 |
| cg01554060 | 0.01089724 | 6.23552672 | 1.52390419 | 25.5145918 | cg13554714 | 0.01981744 | 1554.21607 | 3.21077447 | 752337.982 |
| cg21174792 | 0.01090578 | 1.1065E+11 | 347.612566 | 3.52E+19   | cg22038796 | 0.01983431 | 73.7103258 | 1.97801744 | 2746.79687 |
| cg23635374 | 0.01091075 | 1316.16307 | 5.21879211 | 331932.217 | cg00679681 | 0.01984956 | 9509195.84 | 12.7690037 | 7.0816E+12 |
| cg10043155 | 0.01092208 | 61.9503486 | 2.58254397 | 1486.07177 | cg15838173 | 0.01985603 | 2743.29785 | 3.50650409 | 2146206.85 |
| cg23644624 | 0.01092272 | 9.64465641 | 1.68388584 | 55.2409167 | cg09996156 | 0.01986781 | 290.719084 | 2.45582141 | 34415.2003 |
| cg03890222 | 0.01093261 | 9.33206074 | 1.67082061 | 52.1225061 | cg20994254 | 0.01987301 | 9.00164601 | 1.41619809 | 57.2163114 |
| cg23818888 | 0.01093302 | 10.1782334 | 1.7044696  | 60.7792799 | cg16765160 | 0.01987618 | 1.2017E+10 | 39.4448991 | 3.6607E+18 |
| cg01557883 | 0.01093751 | 3486630.27 | 31.8662106 | 3.8149E+11 | cg26104206 | 0.01988207 | 18.9265987 | 1.59277743 | 224.900311 |
| cg15832300 | 0.01094069 | 26.6871818 | 2.12664775 | 334.895928 | cg14240963 | 0.01988297 | 3206751.73 | 10.711301  | 9.6004E+11 |
| cg11354594 | 0.01094178 | 6.99290474 | 1.56333746 | 31.2796935 | cg07036112 | 0.01988446 | 18.8216591 | 1.59130019 | 222.619751 |
| cg07184698 | 0.01094482 | 8.6788E+13 | 1591.58431 | 4.73E+24   | cg25119415 | 0.01989375 | 0.13507571 | 0.02504443 | 0.72852308 |
| cg02916102 | 0.0109469  | 5.35593741 | 1.47030524 | 19.510279  | cg20278503 | 0.01989538 | 73.8164792 | 1.97492788 | 2759.02358 |
| cg11418036 | 0.01094694 | 8.8326E+11 | 554.514964 | 1.41E+21   | cg01024247 | 0.0199097  | 29.8388286 | 1.71070029 | 520.462701 |
| cg08750890 | 0.01094961 | 1.1688E+12 | 590.940098 | 2.31E+21   | cg17428185 | 0.01991093 | 65.731391  | 1.93815354 | 2229.24328 |
| cg05392364 | 0.01094967 | 10.3209645 | 1.70929122 | 62.3195779 | cg04465286 | 0.01991651 | 478796.557 | 7.90334052 | 2.9006E+10 |
| cg11935317 | 0.01096275 | 1304374991 | 123.69097  | 1.3755E+16 | cg24385580 | 0.01992278 | 12.1669203 | 1.48415233 | 99.7430965 |
| cg21649442 | 0.01096278 | 7.91054098 | 1.60758108 | 38.9259735 | cg14145801 | 0.01992505 | 5.14078582 | 1.29522358 | 20.4039514 |
| cg07687684 | 0.01097335 | 122294229  | 71.7044368 | 2.0858E+14 | cg06395298 | 0.01993292 | 10.1058563 | 1.44102546 | 70.8719821 |
| cg25955899 | 0.01097463 | 291625.978 | 17.9375482 | 4741211562 | cg07268337 | 0.01993541 | 0.06386555 | 0.00629826 | 0.64760907 |
| cg02254152 | 0.01097791 | 694.964941 | 4.48667818 | 107646.738 | cg11931731 | 0.01993922 | 5.79283479 | 1.31967034 | 25.4282709 |
| cg09940756 | 0.01098424 | 22729.1266 | 9.97933913 | 51768277.3 | cg09940756 | 0.01993971 | 19765.6244 | 4.76801441 | 81937652.2 |
| cg15431544 | 0.01098519 | 10.3955517 | 1.71074714 | 63.1697653 | cg19536127 | 0.0199432  | 106.087645 | 2.08838593 | 5389.13249 |
| cg02399048 | 0.01098537 | 26.1437018 | 2.11364216 | 323.372212 | cg21734015 | 0.01994331 | 2649.28779 | 3.47087403 | 2022178.2  |

|            |            |            |            |            |            |            |            |            |            |
|------------|------------|------------|------------|------------|------------|------------|------------|------------|------------|
| cg09370702 | 0.01098637 | 618738.275 | 21.2841458 | 1.7987E+10 | cg00090338 | 0.01995154 | 0.02249883 | 0.00092127 | 0.54945686 |
| cg01627847 | 0.01099336 | 4.00027206 | 1.37412167 | 11.6453855 | cg01706819 | 0.01995685 | 37.7059369 | 1.77311224 | 801.831742 |
| cg10449522 | 0.01099346 | 7051830.78 | 37.1469488 | 1.3387E+12 | cg13544006 | 0.01995966 | 6.65325573 | 1.34849066 | 32.8261908 |
| cg09250087 | 0.01100362 | 7.77229561 | 1.59979644 | 37.7601661 | cg26576398 | 0.019967   | 12.6826754 | 1.49277944 | 107.752192 |
| cg05103231 | 0.01101711 | 2255.43523 | 5.86057103 | 868002.119 | cg26702921 | 0.01998142 | 0.08852484 | 0.011484   | 0.68239689 |
| cg04586579 | 0.01101719 | 7.27151338 | 1.57515869 | 33.5679873 | cg02483701 | 0.01998431 | 21.529211  | 1.62212752 | 285.740131 |
| cg22531889 | 0.01101883 | 1925.07202 | 5.65110313 | 655783.872 | cg09022720 | 0.01998706 | 9.88243613 | 1.43473516 | 68.0700845 |
| cg00090338 | 0.01102095 | 0.0300392  | 0.0020135  | 0.4481507  | cg00667974 | 0.01998778 | 3.756E+11  | 66.6654457 | 2.12E+21   |
| cg19998294 | 0.0110324  | 7.93429502 | 1.60645505 | 39.18755   | cg20199347 | 0.01999242 | 16.6040926 | 1.5568201  | 177.089114 |
| cg00905524 | 0.01103606 | 31.4171276 | 2.20090176 | 448.468864 | cg09555914 | 0.02001379 | 6.08644346 | 1.32879633 | 27.8784589 |
| cg19489174 | 0.01104156 | 21.3206948 | 2.01373825 | 225.735408 | cg08104202 | 0.02003049 | 5.65220265 | 1.3131472  | 24.3288755 |
| cg09656239 | 0.01104548 | 9.4846E+11 | 549.098189 | 1.64E+21   | cg14823287 | 0.02004758 | 6.7535E+12 | 103.852843 | 4.39E+23   |
| cg16018130 | 0.01105359 | 3909675.28 | 32.165308  | 4.7522E+11 | cg07091842 | 0.02005165 | 1199.87509 | 3.0469351  | 472507.682 |
| cg19757176 | 0.01105654 | 8.93440759 | 1.64986304 | 48.3819789 | cg11649846 | 0.02005911 | 85315.1106 | 5.95147019 | 1223003370 |
| cg25644556 | 0.01105764 | 4.73845056 | 1.42714352 | 15.732765  | cg19856002 | 0.02008305 | 263746.965 | 7.09160314 | 9809130597 |
| cg14382259 | 0.01105801 | 45816928.8 | 56.4258927 | 3.7203E+13 | cg09893504 | 0.02009128 | 14.8417554 | 1.52677598 | 144.276375 |
| cg22492279 | 0.01106023 | 201926.46  | 16.3218814 | 2498136950 | cg08826460 | 0.02009274 | 986.922021 | 2.94913634 | 330271.293 |
| cg24276070 | 0.01106615 | 19722165.5 | 46.47471   | 8.3694E+12 | cg02225096 | 0.02009903 | 104925.9   | 6.12888224 | 1796321738 |
| cg06624156 | 0.01108402 | 3180.06398 | 6.30753578 | 1603289.66 | cg10235181 | 0.02009905 | 0.09394218 | 0.01278788 | 0.69011719 |
| cg02384857 | 0.01109411 | 5.33392574 | 1.46543701 | 19.4145252 | cg12111618 | 0.0200992  | 0.07890458 | 0.00927173 | 0.67149608 |
| cg02952078 | 0.01110304 | 420.595731 | 3.96954    | 44564.5512 | cg17355919 | 0.02010001 | 15318.2934 | 4.53212734 | 51774827.7 |
| cg16400756 | 0.01110391 | 0.18099801 | 0.04838747 | 0.67704052 | cg08425070 | 0.02010325 | 21.0106712 | 1.61193992 | 273.861513 |
| cg08302771 | 0.01110835 | 25.434018  | 2.09233124 | 309.171539 | cg18492126 | 0.02010661 | 19.7155976 | 1.59583224 | 243.574969 |
| cg11357813 | 0.01111318 | 9.34E+11   | 537.468532 | 1.62E+21   | cg15831653 | 0.020113   | 79848.3025 | 5.86564039 | 1086965956 |
| cg08973950 | 0.01111419 | 3.93368213 | 1.36667061 | 11.3223003 | cg09013267 | 0.02011399 | 243.609954 | 2.36615185 | 25081.1501 |
| cg25850845 | 0.01111499 | 10.3150201 | 1.70273845 | 62.4873657 | cg20849121 | 0.02011471 | 21613194.5 | 14.1078535 | 3.3111E+13 |
| cg12792157 | 0.0111162  | 114.711374 | 2.94932382 | 4461.59872 | cg03584535 | 0.02012455 | 10.3945829 | 1.44304948 | 74.8743242 |
| cg00674365 | 0.01111756 | 3.35933897 | 1.31829563 | 8.56041543 | cg23158347 | 0.02013238 | 1.3361E+11 | 55.239844  | 3.23E+20   |
| cg20994254 | 0.01112549 | 7.39071004 | 1.57775288 | 34.6205007 | cg19281068 | 0.02013752 | 26021.5529 | 4.91210086 | 137847580  |
| cg26742995 | 0.01112823 | 4.76370939 | 1.42737146 | 15.8984033 | cg26423145 | 0.02014716 | 8.48553839 | 1.39744263 | 51.5258089 |

|            |            |            |            |            |            |            |            |            |            |
|------------|------------|------------|------------|------------|------------|------------|------------|------------|------------|
| cg11803389 | 0.01113111 | 11.9162715 | 1.75903986 | 80.72445   | cg00215224 | 0.02015554 | 44.5428602 | 1.81105923 | 1095.52816 |
| cg18456691 | 0.01114141 | 4342748361 | 156.930038 | 1.2018E+17 | cg13315345 | 0.02015699 | 85.8122441 | 2.00660976 | 3669.74256 |
| cg07719695 | 0.01114519 | 0.0730937  | 0.00969512 | 0.55106982 | cg23959605 | 0.02015981 | 9.66812978 | 1.42599232 | 65.5492546 |
| cg26779378 | 0.01114852 | 6.63376397 | 1.53872203 | 28.5995934 | cg15997906 | 0.02016007 | 4.80896684 | 1.27843414 | 18.0894434 |
| cg25560333 | 0.01115605 | 420.441205 | 3.95707124 | 44672.1316 | cg19252931 | 0.02016245 | 0.14913994 | 0.02995236 | 0.74260316 |
| cg15474579 | 0.01115619 | 12.1336752 | 1.76524703 | 83.4025337 | cg22977667 | 0.02018325 | 2.011E+10  | 40.7305107 | 9.9286E+18 |
| cg11527279 | 0.01115707 | 13.207341  | 1.79961683 | 96.9283312 | cg03994465 | 0.02019154 | 19.287445  | 1.58764646 | 234.312579 |
| cg16586093 | 0.01116436 | 1.066E+12  | 546.469576 | 2.08E+21   | cg21852503 | 0.0201928  | 680653.691 | 8.14752242 | 5.6863E+10 |
| cg26053876 | 0.01116509 | 11.7335873 | 1.75145637 | 78.6071944 | cg21532077 | 0.02019487 | 30.443026  | 1.70482685 | 543.619919 |
| cg11397548 | 0.01116646 | 102.088183 | 2.86556738 | 3636.97509 | cg19241089 | 0.02019949 | 17.0698473 | 1.55740706 | 187.092825 |
| cg07757959 | 0.01116719 | 304.616816 | 3.67489837 | 25250.0601 | cg12656077 | 0.02020818 | 77.4330157 | 1.9716453  | 3041.04999 |
| cg13519902 | 0.01117309 | 14.0339739 | 1.82392674 | 107.98264  | cg15692032 | 0.02020958 | 69549.071  | 5.69839635 | 848848163  |
| cg14160449 | 0.01117785 | 8699881545 | 182.386889 | 4.1499E+17 | cg18202577 | 0.02021835 | 2892.20082 | 3.46737149 | 2412439.97 |
| cg01236148 | 0.01118013 | 12.7393646 | 1.7838973  | 90.9757579 | cg08816023 | 0.02022138 | 17.394625  | 1.56133773 | 193.790858 |
| cg01093696 | 0.01119403 | 8.52346794 | 1.62760385 | 44.6358649 | cg20941453 | 0.02022331 | 34.1893734 | 1.73483144 | 673.79068  |
| cg16232698 | 0.01119439 | 19.5289287 | 1.96514206 | 194.072003 | cg03296761 | 0.02023055 | 23.5530341 | 1.63661145 | 338.959754 |
| cg12023170 | 0.01119593 | 125.406944 | 2.99885018 | 5244.31052 | cg20088847 | 0.02023216 | 0.06046747 | 0.00566278 | 0.64567489 |
| cg05245099 | 0.01119838 | 86687002   | 63.6994022 | 1.1797E+14 | cg02780181 | 0.02024717 | 16630317.8 | 13.3400497 | 2.0732E+13 |
| cg00541565 | 0.01119947 | 5993211.66 | 34.7019196 | 1.0351E+12 | cg24738356 | 0.02024987 | 0.11749284 | 0.01927153 | 0.71631921 |
| cg22619719 | 0.01120593 | 25688.4465 | 10.0444631 | 65697516.7 | cg18682936 | 0.02025565 | 10170531.4 | 12.3446824 | 8.3793E+12 |
| cg14784847 | 0.01121385 | 42.6886746 | 2.34583098 | 776.834716 | cg07065111 | 0.02026551 | 6.62833956 | 1.34242262 | 32.7280579 |
| cg08074851 | 0.01123478 | 6.15111937 | 1.51021903 | 25.053498  | cg06952384 | 0.02027083 | 175.938283 | 2.23621016 | 13842.2943 |
| cg16054642 | 0.01123551 | 101.136227 | 2.8507953  | 3587.95891 | cg02580197 | 0.02031323 | 8.22189332 | 1.38727626 | 48.7282395 |
| cg03098361 | 0.01123822 | 6908428.48 | 35.6335392 | 1.3394E+12 | cg12955299 | 0.0203255  | 148088721  | 18.5700223 | 1.181E+15  |
| cg14516246 | 0.01124045 | 22930319.7 | 46.7654495 | 1.1243E+13 | cg25404454 | 0.02033341 | 2987.82991 | 3.46344223 | 2577530.39 |
| cg01999333 | 0.01124264 | 0.09260343 | 0.0147124  | 0.58286836 | cg11582116 | 0.02033931 | 609.784789 | 2.70554819 | 137435.175 |
| cg03110633 | 0.01124394 | 1.2889E+12 | 558.676121 | 2.97E+21   | cg26987699 | 0.02034362 | 9.4277394  | 1.4164404  | 62.7504482 |
| cg10143146 | 0.01124593 | 9.04658699 | 1.64799865 | 49.6606816 | cg18514705 | 0.02034954 | 70.4608295 | 1.93495735 | 2565.80771 |
| cg15622309 | 0.0112461  | 14518.0961 | 8.79078913 | 23976813.7 | cg02628508 | 0.02035079 | 3.51E-16   | 3.07E-29   | 0.00400519 |
| cg04985324 | 0.01124975 | 1.0043E+13 | 888.605134 | 1.14E+23   | cg11892243 | 0.0203598  | 2363779.33 | 9.73408935 | 5.7401E+11 |

|            |            |            |            |            |            |            |            |            |            |
|------------|------------|------------|------------|------------|------------|------------|------------|------------|------------|
| cg27297326 | 0.01125075 | 7.41696596 | 1.57525633 | 34.9221794 | cg10272885 | 0.02036037 | 313168650  | 20.7648093 | 4.7231E+15 |
| cg07895149 | 0.01125093 | 11.9362713 | 1.75473723 | 81.1942497 | cg13908523 | 0.02037567 | 4.7997E+11 | 64.572623  | 3.57E+21   |
| cg11744300 | 0.01125722 | 1.1267E+13 | 910.141953 | 1.39E+23   | cg21504505 | 0.02039092 | 0.08591923 | 0.01079539 | 0.68382115 |
| cg19110758 | 0.01125865 | 34.6609313 | 2.23404438 | 537.760202 | cg20942223 | 0.02039978 | 11.0625705 | 1.45070908 | 84.3590679 |
| cg23589617 | 0.01126567 | 9.57561298 | 1.66867386 | 54.9492421 | cg13078926 | 0.02040938 | 557.726971 | 2.66039604 | 116922.206 |
| cg27126666 | 0.01126897 | 796.310802 | 4.54370416 | 139558.138 | cg15190747 | 0.02041101 | 0.11031112 | 0.01711437 | 0.71101314 |
| cg19809499 | 0.01127074 | 3.46583771 | 1.32530582 | 9.06359184 | cg14505694 | 0.02041855 | 20226.3325 | 4.6342268  | 88278917.8 |
| cg08266576 | 0.01128666 | 0.00853021 | 0.00021401 | 0.3400048  | cg06032048 | 0.02042242 | 8374.49598 | 4.0424519  | 17348922   |
| cg00131758 | 0.0112869  | 10.1733018 | 1.69093985 | 61.2062396 | cg04914105 | 0.02043115 | 259.492677 | 2.36144549 | 28514.9285 |
| cg19060120 | 0.01128693 | 141.327757 | 3.06826959 | 6509.70664 | cg27485194 | 0.02043211 | 756147.324 | 8.10369456 | 7.0555E+10 |
| cg26577320 | 0.01128993 | 9.22544246 | 1.65379824 | 51.4626191 | cg25250853 | 0.02044294 | 8374.89663 | 4.03745361 | 17372061.8 |
| cg24521848 | 0.01129382 | 6.80434586 | 1.54354842 | 29.9952512 | cg20615910 | 0.0204505  | 20.0861367 | 1.58940208 | 253.83941  |
| cg05927159 | 0.01131238 | 5881356.4  | 33.9810047 | 1.0179E+12 | cg26413730 | 0.02045802 | 465.972075 | 2.58223942 | 84085.9192 |
| cg09576143 | 0.01131698 | 7.6003826  | 1.58199126 | 36.5146237 | cg16584020 | 0.02046086 | 19695.8383 | 4.60227397 | 84290081.2 |
| cg26896499 | 0.01131792 | 104.35473  | 2.86072212 | 3806.69959 | cg23665824 | 0.02047509 | 10.7041957 | 1.44160385 | 79.4807849 |
| cg09307564 | 0.01131834 | 34.674239  | 2.22976059 | 539.20715  | cg24616828 | 0.02048118 | 27495.7698 | 4.83878011 | 156241312  |
| cg25283841 | 0.01131852 | 67917.8423 | 12.3794122 | 372621351  | cg02622866 | 0.02048434 | 2138.67243 | 3.26278548 | 1401845.08 |
| cg16155498 | 0.01132059 | 8.5991E+11 | 499.586812 | 1.48E+21   | cg18764192 | 0.0204918  | 2996.98294 | 3.43569452 | 2614291.43 |
| cg01211283 | 0.01132228 | 6.54065822 | 1.5290257  | 27.9787384 | cg14398731 | 0.02050297 | 0.10147675 | 0.01465046 | 0.70288116 |
| cg16699850 | 0.0113302  | 198908.672 | 15.7632777 | 2509925949 | cg24028120 | 0.02050565 | 2.6445E+12 | 82.0447005 | 8.52E+22   |
| cg26404511 | 0.01133146 | 5.93740457 | 1.49570408 | 23.56935   | cg16195332 | 0.02051199 | 9.39640203 | 1.41212704 | 62.5243826 |
| cg08993385 | 0.0113323  | 15.5822471 | 1.8601357  | 130.531566 | cg02417264 | 0.02051391 | 0.01666581 | 0.00052184 | 0.53224944 |
| cg03259273 | 0.01133459 | 198310.967 | 15.7445895 | 2497825659 | cg20451727 | 0.02051644 | 227711.976 | 6.68475059 | 7756870430 |
| cg21097354 | 0.01134148 | 18.1320235 | 1.92446708 | 170.837049 | cg24304712 | 0.02052394 | 12872.3747 | 4.29257386 | 38601090.2 |
| cg24886748 | 0.01134201 | 218101805  | 76.5321243 | 6.2155E+14 | cg12072333 | 0.02052536 | 393948.524 | 7.26797288 | 2.1353E+10 |
| cg14129855 | 0.01134321 | 8.9553021  | 1.6408926  | 48.8742747 | cg06994787 | 0.02052596 | 11.2858066 | 1.45221972 | 87.7067209 |
| cg14658900 | 0.01134911 | 2750897.3  | 28.4677825 | 2.6582E+11 | cg23363971 | 0.02052787 | 3.79191285 | 1.22773616 | 11.7114764 |
| cg16483033 | 0.01135225 | 17.8173031 | 1.91630737 | 165.660423 | cg00467202 | 0.02053626 | 1910.78393 | 3.19816152 | 1141623.15 |
| cg16317734 | 0.01135287 | 35.4518226 | 2.23836269 | 561.496015 | cg26080673 | 0.02054255 | 691856189  | 22.9031809 | 2.0899E+16 |
| cg26186134 | 0.01136047 | 26123.1366 | 9.933679   | 68697434.9 | cg15718222 | 0.02054291 | 18.4680254 | 1.56608579 | 217.783703 |

|            |            |            |            |            |            |            |            |            |            |
|------------|------------|------------|------------|------------|------------|------------|------------|------------|------------|
| cg18856581 | 0.01136371 | 4.72785076 | 1.41997149 | 15.7415645 | cg19695710 | 0.020564   | 0.09232973 | 0.0122942  | 0.69339839 |
| cg06395298 | 0.01136529 | 8.20574302 | 1.60810219 | 41.8718528 | cg06080402 | 0.02057808 | 34988245.7 | 14.411806  | 8.4943E+13 |
| cg00000363 | 0.01136727 | 11.3422817 | 1.72990768 | 74.3666014 | cg27401681 | 0.0205801  | 7.5668E+11 | 66.7415505 | 8.58E+21   |
| cg04538470 | 0.01136741 | 9.2936E+16 | 6750.36832 | 1.28E+30   | cg04618532 | 0.02058115 | 1.0268E+17 | 409.780524 | 2.57E+31   |
| cg19414706 | 0.01136955 | 27.6240519 | 2.114639   | 360.859818 | cg19056004 | 0.02059506 | 12.7151825 | 1.47738768 | 109.433608 |
| cg11472173 | 0.01137069 | 2678631231 | 134.082077 | 5.3512E+16 | cg01633093 | 0.02059577 | 12.603407  | 1.47536924 | 107.665163 |
| cg09091185 | 0.01137174 | 0.09305031 | 0.01479552 | 0.58520163 | cg03221702 | 0.02059889 | 177.778822 | 2.21442059 | 14272.4963 |
| cg20097219 | 0.01138187 | 5.48605073 | 1.46802365 | 20.5015448 | cg26816421 | 0.02060509 | 55.7704151 | 1.85321477 | 1678.34795 |
| cg11474317 | 0.01138223 | 668914047  | 97.8246158 | 4.574E+15  | cg00065570 | 0.0206077  | 312.95059  | 2.41435762 | 40564.857  |
| cg11251498 | 0.01138465 | 15.0262936 | 1.84245499 | 122.548177 | cg21534486 | 0.02060951 | 6357966.12 | 11.0543962 | 3.6568E+12 |
| cg24550525 | 0.01139203 | 12.0881032 | 1.75392877 | 83.3113868 | cg27494615 | 0.02061207 | 4272.60918 | 3.60442444 | 5064661.37 |
| cg03525424 | 0.01139555 | 5.8849E+10 | 267.684349 | 1.2938E+19 | cg01682784 | 0.02064053 | 0.09067353 | 0.01187553 | 0.69232173 |
| cg04413872 | 0.0113991  | 3810342    | 30.4232216 | 4.7722E+11 | cg04671541 | 0.02064119 | 12.8758173 | 1.47907169 | 112.088328 |
| cg11540838 | 0.01140335 | 2.7116E+12 | 633.39759  | 1.16E+22   | cg07212963 | 0.02064457 | 12434.7669 | 4.23742154 | 36489980.3 |
| cg04615531 | 0.01140354 | 77037.8304 | 12.6226788 | 470171775  | cg12796272 | 0.02064615 | 12489.0912 | 4.23983103 | 36788588.3 |
| cg14159304 | 0.01140417 | 20.1932828 | 1.96835173 | 207.162501 | cg08367083 | 0.02065085 | 9.00984577 | 1.40015719 | 57.977291  |
| cg27042278 | 0.01140525 | 67.0220275 | 2.57919138 | 1741.61258 | cg13116174 | 0.02065784 | 5.9495E+10 | 44.5838728 | 7.9393E+19 |
| cg04772328 | 0.01140626 | 10.7908361 | 1.70906366 | 68.1321275 | cg02792140 | 0.02066127 | 106310.215 | 5.87853948 | 1922562877 |
| cg20633478 | 0.01141197 | 0.17937468 | 0.04738247 | 0.67905448 | cg06361403 | 0.02066716 | 2633.08347 | 3.33683797 | 2077754.04 |
| cg06093712 | 0.01141399 | 6.71944879 | 1.53584309 | 29.3981803 | cg23008404 | 0.02066959 | 9.06250516 | 1.40102085 | 58.6208262 |
| cg24921484 | 0.01141763 | 5.7173E+12 | 746.387681 | 4.38E+22   | cg08611810 | 0.02067644 | 9.59974879 | 1.41327311 | 65.2069133 |
| cg25048751 | 0.01142058 | 11.0407304 | 1.71734616 | 70.9802889 | cg06318386 | 0.02068735 | 802.187667 | 2.77949856 | 231518.398 |
| cg03896661 | 0.01142301 | 2246977.49 | 26.9203701 | 1.8755E+11 | cg24664672 | 0.0206986  | 3634.17944 | 3.49944886 | 3774097.22 |
| cg17237881 | 0.0114268  | 2827.28562 | 5.98360197 | 1335908.38 | cg17008160 | 0.02072767 | 11.4805001 | 1.4512678  | 90.8184439 |
| cg08122234 | 0.01143109 | 6.87934973 | 1.54352109 | 30.6607101 | cg17217059 | 0.02073904 | 21.1986802 | 1.59327689 | 282.050185 |
| cg20433275 | 0.01145217 | 3.96895181 | 1.36341935 | 11.5537296 | cg11587658 | 0.02078344 | 18975.6596 | 4.47975756 | 80378380.7 |
| cg13613439 | 0.01145562 | 10.4229849 | 1.69391561 | 64.1346086 | cg10531073 | 0.02078797 | 8.2819065  | 1.37954542 | 49.7192585 |
| cg21131149 | 0.01145708 | 40397469.1 | 51.3046234 | 3.1809E+13 | cg08104568 | 0.02078824 | 19.1883671 | 1.56773025 | 234.857643 |
| cg05299486 | 0.01145817 | 16.6573709 | 1.8821076  | 147.424094 | cg14482741 | 0.02080303 | 12.7913522 | 1.47352562 | 111.038918 |
| cg05863534 | 0.01145947 | 25999.9629 | 9.82948122 | 68772507.6 | cg17730428 | 0.02081628 | 238.69656  | 2.2985385  | 24787.9459 |

|            |            |            |            |            |            |            |            |            |            |
|------------|------------|------------|------------|------------|------------|------------|------------|------------|------------|
| cg00171166 | 0.01146493 | 0.00208141 | 1.74E-05   | 0.2496188  | cg13813391 | 0.02082612 | 439.411243 | 2.52095348 | 76590.9575 |
| cg18895088 | 0.01146605 | 5.63885876 | 1.47512548 | 21.5552702 | cg11609154 | 0.02082702 | 2942.5177  | 3.36531353 | 2572839.16 |
| cg05637351 | 0.01146821 | 12.6276493 | 1.76806452 | 90.1876175 | cg25165701 | 0.02084527 | 11.4541276 | 1.44799387 | 90.6060734 |
| cg07135540 | 0.01147168 | 14.0784921 | 1.81165468 | 109.404922 | cg17569080 | 0.02085603 | 11808.3157 | 4.14887129 | 33608253.8 |
| cg05028274 | 0.01147396 | 7.36E-05   | 4.59E-08   | 0.11785829 | cg06969845 | 0.02085699 | 0.07265365 | 0.00785787 | 0.67175353 |
| cg23973885 | 0.01147789 | 20.7037637 | 1.97530291 | 217.002582 | cg03019033 | 0.02086326 | 410.077146 | 2.49092731 | 67510.3063 |
| cg04784315 | 0.01147922 | 0.01667499 | 0.00069743 | 0.39868687 | cg02083373 | 0.02087379 | 4.9692E+10 | 41.8634864 | 5.8984E+19 |
| cg17319109 | 0.01148274 | 3.186E+13  | 1078.24257 | 9.41E+23   | cg16131766 | 0.02087706 | 0.16999544 | 0.03780451 | 0.76441807 |
| cg11105830 | 0.01148726 | 828.276923 | 4.52141547 | 151731.834 | cg22907891 | 0.02089774 | 0.00213538 | 1.16E-05   | 0.39400629 |
| cg17228821 | 0.01149481 | 1597702.63 | 24.6917218 | 1.0338E+11 | cg19109608 | 0.02089926 | 10.3742841 | 1.42519426 | 75.5165622 |
| cg04478991 | 0.01149858 | 18.2772797 | 1.91967381 | 174.018603 | cg05783676 | 0.0209098  | 2437.28701 | 3.25637375 | 1824227.94 |
| cg07239293 | 0.01150167 | 569.324211 | 4.15280826 | 78050.812  | cg17884201 | 0.02091517 | 0.06998857 | 0.0073259  | 0.66864101 |
| cg23105863 | 0.01151019 | 5.64129423 | 1.4742126  | 21.5872531 | cg02461665 | 0.02091614 | 15.2896654 | 1.5109597  | 154.718797 |
| cg20516737 | 0.01151434 | 1.1989E+11 | 305.439612 | 4.7063E+19 | cg25826098 | 0.02091936 | 192779084  | 17.9360477 | 2.072E+15  |
| cg13460057 | 0.01151529 | 20.9733262 | 1.97893859 | 222.280981 | cg03807235 | 0.02092019 | 0.00012205 | 5.82E-08   | 0.25575467 |
| cg12249359 | 0.01151731 | 75880.4642 | 12.4295573 | 463238127  | cg09755939 | 0.02095443 | 36.9260844 | 1.72508547 | 790.416324 |
| cg13145017 | 0.01152375 | 90761850   | 60.8444275 | 1.3539E+14 | cg15701440 | 0.02095463 | 81569.9474 | 5.52183481 | 1204971998 |
| cg01027365 | 0.01152709 | 390.020534 | 3.80943063 | 39931.4313 | cg01098651 | 0.02095682 | 401.169732 | 2.47342877 | 65066.4194 |
| cg24237081 | 0.01152756 | 8.09637018 | 1.59813359 | 41.0173533 | cg02605634 | 0.02096625 | 43.336157  | 1.76679423 | 1062.95486 |
| cg17325073 | 0.01152926 | 4.6596E+16 | 5448.88264 | 3.98E+29   | cg24727216 | 0.02096982 | 14.3536536 | 1.49516532 | 137.795713 |
| cg09299055 | 0.01153444 | 7.65721546 | 1.57807201 | 37.1547993 | cg07983905 | 0.02098431 | 5.71572128 | 1.30087976 | 25.1133662 |
| cg16656078 | 0.01153516 | 169.725507 | 3.16000503 | 9116.0449  | cg18237323 | 0.02099089 | 6.33838586 | 1.32123036 | 30.4073661 |
| cg26830834 | 0.01153703 | 105256275  | 62.7553707 | 1.7654E+14 | cg10560079 | 0.02100548 | 1718.94742 | 3.07416637 | 961164.713 |
| cg00694371 | 0.01153732 | 2663.23049 | 5.85554478 | 1211295.77 | cg23527902 | 0.02101125 | 17.8219984 | 1.5436129  | 205.766372 |
| cg27662481 | 0.01154188 | 0.15907298 | 0.03820018 | 0.66241086 | cg04465834 | 0.02101534 | 116.023596 | 2.04693009 | 6576.42145 |
| cg19657320 | 0.01154365 | 24264272.8 | 45.1221184 | 1.3048E+13 | cg13719287 | 0.0210238  | 12.6172015 | 1.46501027 | 108.66393  |
| cg09652501 | 0.0115593  | 5550.88144 | 6.89079188 | 4471515.79 | cg23588217 | 0.02105163 | 11.9595298 | 1.45258134 | 98.4663293 |
| cg04981056 | 0.0115618  | 9.30052128 | 1.64741091 | 52.5064484 | cg15945016 | 0.02106149 | 34.6722812 | 1.70446346 | 705.305284 |
| cg13702222 | 0.01156862 | 5.55904628 | 1.46798654 | 21.0512799 | cg26464221 | 0.02106567 | 9.92840509 | 1.41216861 | 69.8027323 |
| cg25161465 | 0.01156878 | 0.11235225 | 0.02058877 | 0.61310252 | cg11228744 | 0.02107003 | 0.12133367 | 0.02021459 | 0.72827892 |



|            |            |            |            |            |            |            |            |            |            |
|------------|------------|------------|------------|------------|------------|------------|------------|------------|------------|
| cg25860425 | 0.01156992 | 2.9267E+10 | 219.848816 | 3.8962E+18 | cg23169269 | 0.02108716 | 0.07536359 | 0.00837508 | 0.67816303 |
| cg10415607 | 0.01157957 | 8241.57407 | 7.5154608  | 9037841.46 | cg09540111 | 0.02108991 | 983.688813 | 2.8152331  | 343717.073 |
| cg20277282 | 0.01158051 | 5.82026521 | 1.48285963 | 22.8447025 | cg20201566 | 0.0210925  | 383706.208 | 6.89599743 | 2.135E+10  |
| cg02045669 | 0.01159021 | 7.45091083 | 1.56680236 | 35.4327218 | cg14457918 | 0.0210992  | 3014.51987 | 3.32928087 | 2729517.39 |
| cg12691534 | 0.01159523 | 7.4148425  | 1.56495641 | 35.1318981 | cg12230071 | 0.0211022  | 121685.22  | 5.79920551 | 2553331260 |
| cg09101894 | 0.01159574 | 11.0090079 | 1.70949181 | 70.8972423 | cg00190795 | 0.02111268 | 9.89112394 | 1.41036693 | 69.3679998 |
| cg05414235 | 0.01160069 | 1413.6785  | 5.05903654 | 395033.102 | cg25826457 | 0.02111322 | 3940.48645 | 3.4632446  | 4483493.15 |
| cg15081886 | 0.01160688 | 7.64423658 | 1.57530346 | 37.0940295 | cg02944245 | 0.02111757 | 4513269.88 | 9.96005302 | 2.0451E+12 |
| cg05108179 | 0.01161201 | 2486.31956 | 5.7346957  | 1077962.16 | cg01120874 | 0.02113992 | 34.9049351 | 1.70304491 | 715.397749 |
| cg13466546 | 0.01161769 | 172.499342 | 3.15894808 | 9419.59858 | cg25754252 | 0.02114873 | 193317.705 | 6.19333927 | 6034181806 |
| cg14205126 | 0.0116198  | 8440.26306 | 7.53003722 | 9460516.38 | cg16963127 | 0.02115562 | 52.5278851 | 1.80987993 | 1524.50927 |
| cg23466060 | 0.01162528 | 11.4986262 | 1.72504094 | 76.6465315 | cg09578614 | 0.02115828 | 0.00230271 | 1.32E-05   | 0.40272524 |
| cg19305681 | 0.0116305  | 7.11339794 | 1.54950505 | 32.6558666 | cg03921416 | 0.02116268 | 94.8599154 | 1.97697301 | 4551.60667 |
| cg03019000 | 0.01163146 | 8.3001764  | 1.60377047 | 42.9568504 | cg21145140 | 0.02116295 | 15.1343953 | 1.50195681 | 152.501005 |
| cg07037112 | 0.01163576 | 8.55651209 | 1.61455659 | 45.3461339 | cg20776123 | 0.02117107 | 1771949.48 | 8.61285556 | 3.6455E+11 |
| cg00794055 | 0.01163655 | 4.82556459 | 1.42081316 | 16.3892582 | cg16003274 | 0.02118035 | 23740.0271 | 4.51408656 | 124851148  |
| cg00731944 | 0.01163997 | 0.15672681 | 0.03714228 | 0.66132976 | cg24425705 | 0.0211866  | 268.067848 | 2.30762007 | 31140.4689 |
| cg27299526 | 0.0116413  | 0.00420873 | 6.00E-05   | 0.29506873 | cg01656221 | 0.02119965 | 34.4828667 | 1.69757642 | 700.450407 |
| cg09796739 | 0.01164144 | 12.9140007 | 1.76965236 | 94.2396465 | cg04558861 | 0.0212009  | 81.0859897 | 1.92894189 | 3408.57221 |
| cg14470448 | 0.0116416  | 8.95140278 | 1.63070088 | 49.1369156 | cg13188519 | 0.0212018  | 12157.7524 | 4.07864003 | 36240252.1 |
| cg12392916 | 0.01164317 | 8056.14771 | 7.43755381 | 8726191.11 | cg01522826 | 0.02120502 | 26.3903588 | 1.63086015 | 427.045224 |
| cg19573564 | 0.01164837 | 236799.598 | 15.802567  | 3548413963 | cg07117311 | 0.02121216 | 25.671804  | 1.62389854 | 405.839098 |
| cg22168087 | 0.01164995 | 102.136557 | 2.80613048 | 3717.53075 | cg15227217 | 0.021215   | 44485.5938 | 4.9466516  | 400062145  |
| cg09874107 | 0.01165396 | 307.837699 | 3.58820962 | 26409.842  | cg02068689 | 0.02123781 | 278.128786 | 2.31597555 | 33400.8801 |
| cg16642791 | 0.01165434 | 7.2178441  | 1.55387341 | 33.5273602 | cg14908680 | 0.02125645 | 2.34E-05   | 2.67E-09   | 0.20390404 |
| cg07493874 | 0.01165938 | 11.7832971 | 1.73312866 | 80.1129732 | cg01911068 | 0.0212613  | 15806.4257 | 4.22578861 | 59123424.2 |
| cg27343303 | 0.01167401 | 393.360489 | 3.78561379 | 40873.814  | cg11698816 | 0.02126859 | 11390542.7 | 11.2605653 | 1.1522E+13 |
| cg11804775 | 0.01168559 | 780.234189 | 4.40651833 | 138151.108 | cg17016559 | 0.02129334 | 0.00388725 | 3.45E-05   | 0.43772606 |
| cg24963041 | 0.01168918 | 641.348785 | 4.21738653 | 97531.5543 | cg17081801 | 0.02130672 | 55641491   | 14.1995198 | 2.1803E+14 |
| cg19886978 | 0.01170115 | 873.128377 | 4.5138863  | 168890.644 | cg06973760 | 0.0213161  | 780444096  | 21.0065778 | 2.8995E+16 |

|            |            |            |            |            |            |            |            |            |            |
|------------|------------|------------|------------|------------|------------|------------|------------|------------|------------|
| cg21818602 | 0.01170263 | 5.2896E+11 | 406.387695 | 6.88E+20   | cg06116248 | 0.0213271  | 1396047.46 | 8.19119795 | 2.3793E+11 |
| cg27508071 | 0.01170737 | 21.9325638 | 1.9878713  | 241.986165 | cg22354234 | 0.02132982 | 25742.0997 | 4.52373924 | 146484061  |
| cg11260715 | 0.0117075  | 83.4311375 | 2.67600764 | 2601.17147 | cg00088227 | 0.0213379  | 1.2572E+13 | 88.3283762 | 1.79E+24   |
| cg01822130 | 0.01171016 | 4.61240037 | 1.40509129 | 15.140822  | cg13388731 | 0.02133844 | 23.9642531 | 1.60305684 | 358.243956 |
| cg03080561 | 0.01171057 | 18659018.8 | 41.4510161 | 8.3993E+12 | cg27662875 | 0.02133871 | 53224.0994 | 5.0362282  | 562485386  |
| cg13668129 | 0.01171108 | 30.3222861 | 2.13617354 | 430.414953 | cg21926750 | 0.02134045 | 89688.0103 | 5.44147108 | 1478265543 |
| cg15588266 | 0.01171468 | 742729.751 | 20.2229462 | 2.7278E+10 | cg25349574 | 0.02134105 | 20.0167872 | 1.56067958 | 256.729041 |
| cg04768602 | 0.01171664 | 5.996236   | 1.48939126 | 24.1406319 | cg23027583 | 0.02135332 | 4.20750434 | 1.23778338 | 14.3022544 |
| cg23732368 | 0.01171784 | 1441.48972 | 5.04103159 | 412195.911 | cg17538898 | 0.02136353 | 1080923.74 | 7.85945431 | 1.4866E+11 |
| cg16629179 | 0.01172511 | 17.4082456 | 1.88738379 | 160.564595 | cg07562483 | 0.02137165 | 10.4408761 | 1.41619312 | 76.9753022 |
| cg08641866 | 0.01173082 | 638.993887 | 4.20344009 | 97137.863  | cg10440696 | 0.02140941 | 0.14909787 | 0.02946783 | 0.75438789 |
| cg13672975 | 0.01173827 | 1721943306 | 112.808748 | 2.6284E+16 | cg01287088 | 0.02140985 | 13.3127566 | 1.46722267 | 120.792496 |
| cg15203597 | 0.01174507 | 759.743425 | 4.36449308 | 132251.343 | cg02962602 | 0.0214183  | 12.2728323 | 1.44945472 | 103.916605 |
| cg19347782 | 0.01174617 | 6.24919061 | 1.50238906 | 25.9935221 | cg16101148 | 0.02142181 | 24.229324  | 1.60288598 | 366.251964 |
| cg19655952 | 0.01174827 | 14.1401955 | 1.80109696 | 111.012972 | cg17426063 | 0.02143404 | 110.945739 | 2.00697693 | 6133.08346 |
| cg06795971 | 0.01175035 | 21244.5531 | 9.14275414 | 49364888.4 | cg13277380 | 0.02143409 | 10.0675839 | 1.40723603 | 72.0250502 |
| cg21445527 | 0.0117543  | 306.547264 | 3.56580543 | 26353.4359 | cg09527362 | 0.02143588 | 135.492879 | 2.06708523 | 8881.25949 |
| cg05628616 | 0.01176402 | 11.0703974 | 1.70520084 | 71.8705364 | cg27280575 | 0.02144995 | 7.60805165 | 1.34982993 | 42.8812908 |
| cg20088847 | 0.01176642 | 0.07015254 | 0.00887581 | 0.55447116 | cg09758595 | 0.02145461 | 95077.2493 | 5.44201351 | 1661091675 |
| cg12544974 | 0.01176662 | 6.70571743 | 1.52555656 | 29.475568  | cg16635274 | 0.02146799 | 483717.386 | 6.91329397 | 3.3845E+10 |
| cg21691089 | 0.01176865 | 2.4677E+10 | 202.46991  | 3.0077E+18 | cg13694927 | 0.02147897 | 9.43135107 | 1.39279379 | 63.8647183 |
| cg08767936 | 0.01176997 | 8.11481488 | 1.59142034 | 41.37827   | cg26824174 | 0.02148906 | 19.1575987 | 1.54611291 | 237.378259 |
| cg16667508 | 0.01177629 | 7.85509113 | 1.57978325 | 39.0575458 | cg23609905 | 0.02149151 | 927305.624 | 7.59479655 | 1.1322E+11 |
| cg01748892 | 0.01178215 | 17.1230597 | 1.8776498  | 156.152214 | cg11550381 | 0.02149546 | 10940598   | 10.9267412 | 1.0954E+13 |
| cg16017089 | 0.01178428 | 3.53086177 | 1.32285395 | 9.42430935 | cg23067317 | 0.02149785 | 8.33885613 | 1.36734849 | 50.8550102 |
| cg21926138 | 0.01178518 | 31.4657311 | 2.14875115 | 460.775662 | cg22610434 | 0.02150269 | 0.15636424 | 0.03214609 | 0.76058325 |
| cg02764271 | 0.01178528 | 1.4169E+13 | 825.38312  | 2.43E+23   | cg09701102 | 0.02150274 | 0.00231859 | 1.32E-05   | 0.40870395 |
| cg05502525 | 0.01178684 | 5721397814 | 145.827931 | 2.2447E+17 | cg00938535 | 0.02150468 | 1870.88234 | 3.03764987 | 1152272.61 |
| cg23041619 | 0.01178836 | 442111.979 | 17.8600847 | 1.0944E+10 | cg10920316 | 0.02150609 | 8.64341413 | 1.37444365 | 54.3555261 |
| cg04771029 | 0.01179025 | 3527760.96 | 28.2994768 | 4.3976E+11 | cg18706864 | 0.02152301 | 14966712.9 | 11.409779  | 1.9633E+13 |

|            |            |            |            |            |            |            |            |            |            |
|------------|------------|------------|------------|------------|------------|------------|------------|------------|------------|
| cg03671191 | 0.0117923  | 8.44856278 | 1.60501199 | 44.4720746 | cg25492645 | 0.02152372 | 7588.10342 | 3.73019534 | 15436004.9 |
| cg02223962 | 0.0117939  | 12454.6728 | 8.08949017 | 19175358.5 | cg08741214 | 0.0215242  | 470.043897 | 2.47586576 | 89237.9824 |
| cg05789714 | 0.01179427 | 22.9231479 | 2.00245809 | 262.412837 | cg02409878 | 0.02152581 | 4.2293031  | 1.23671946 | 14.4632678 |
| cg21692194 | 0.01179478 | 8.47016445 | 1.60584231 | 44.6766691 | cg10474377 | 0.02152589 | 558.744063 | 2.53956074 | 122932.648 |
| cg08193141 | 0.01179767 | 0.01234206 | 0.0004035  | 0.37751447 | cg06726167 | 0.02157419 | 6.63E-06   | 2.54E-10   | 0.1732352  |
| cg20011278 | 0.01179785 | 253.6525   | 3.41133092 | 18860.5539 | cg12783491 | 0.02158648 | 1145.97984 | 2.81522267 | 466488.785 |
| cg09259081 | 0.01180807 | 6.00746065 | 1.48775458 | 24.2577533 | cg15616111 | 0.02158792 | 341276686  | 17.937724  | 6.493E+15  |
| cg18592307 | 0.01181084 | 214.070409 | 3.2833117  | 13957.2919 | cg02606566 | 0.02159468 | 34454910.7 | 12.7971869 | 9.2766E+13 |
| cg05099952 | 0.01181241 | 9.21339784 | 1.63547474 | 51.9034001 | cg10683958 | 0.02160111 | 6945.679   | 3.66549044 | 13161255.7 |
| cg14083397 | 0.01181512 | 326.279711 | 3.6038131  | 29540.5026 | cg03236948 | 0.02160732 | 22.0945165 | 1.57523532 | 309.901416 |
| cg13225596 | 0.01182251 | 9.58748924 | 1.64961108 | 55.7221948 | cg07273992 | 0.02161222 | 28.4782872 | 1.63486195 | 496.074203 |
| cg08469255 | 0.0118262  | 34.4805634 | 2.1898629  | 542.914928 | cg00741410 | 0.02161238 | 9.06594461 | 1.38203775 | 59.4711335 |
| cg13773631 | 0.01182783 | 7.87428597 | 1.57908884 | 39.2659223 | cg00013441 | 0.02161531 | 238.434829 | 2.23296629 | 25459.931  |
| cg08512882 | 0.01183274 | 3.0336E+13 | 964.000284 | 9.55E+23   | cg23713813 | 0.02161727 | 2153017.99 | 8.49771299 | 5.455E+11  |
| cg01706263 | 0.01184244 | 0.10419208 | 0.01790493 | 0.60631282 | cg08971171 | 0.02162229 | 711.192385 | 2.62061453 | 193006.107 |
| cg01074928 | 0.01184312 | 522.789019 | 3.99402055 | 68429.3821 | cg14022550 | 0.02162303 | 261.693488 | 2.26304279 | 30261.6823 |
| cg24203851 | 0.01184712 | 926.994293 | 4.53247548 | 189591.411 | cg12821132 | 0.02163551 | 78371.5448 | 5.2189188  | 1176891089 |
| cg16400971 | 0.01185062 | 412202.348 | 17.4548319 | 9734311733 | cg13997645 | 0.02164398 | 6.66864138 | 1.32061048 | 33.6744093 |
| cg05011526 | 0.01185262 | 46.8287061 | 2.34122319 | 936.658978 | cg11699666 | 0.02164498 | 1077.68999 | 2.78251019 | 417398.55  |
| cg26504026 | 0.01185357 | 13.4228815 | 1.77590351 | 101.454694 | cg11849105 | 0.0216464  | 562175.815 | 6.96045313 | 4.5405E+10 |
| cg05327187 | 0.0118536  | 0.01926146 | 0.00088861 | 0.41750826 | cg14967868 | 0.02164793 | 155533.281 | 5.76506623 | 4196066558 |
| cg10272885 | 0.01186193 | 303088985  | 74.9927179 | 1.225E+15  | cg20772300 | 0.0216527  | 343.411149 | 2.35243156 | 50131.6251 |
| cg21973275 | 0.01186323 | 107898346  | 59.6706775 | 1.9511E+14 | cg00569934 | 0.02166265 | 2218.33217 | 3.09031636 | 1592392.83 |
| cg03712341 | 0.01186919 | 2345474267 | 117.71965  | 4.6732E+16 | cg16385583 | 0.02166297 | 0.05037439 | 0.0039307  | 0.64558007 |
| cg04021672 | 0.01187009 | 19.3334684 | 1.9242776  | 194.245883 | cg00149397 | 0.02166544 | 5.9284E+12 | 74.1783753 | 4.74E+23   |
| cg25767504 | 0.01187263 | 47.5352636 | 2.3473216  | 962.629613 | cg20929143 | 0.02167216 | 25999745.8 | 12.1734324 | 5.553E+13  |
| cg26296364 | 0.01187449 | 8.00302106 | 1.58335343 | 40.4510736 | cg23130076 | 0.02167463 | 1473658850 | 21.9753123 | 9.8823E+16 |
| cg08892236 | 0.01187712 | 49.9885963 | 2.37318626 | 1052.9556  | cg00358323 | 0.02167948 | 206128.986 | 5.99291362 | 7089900129 |
| cg01036779 | 0.01188933 | 1019.68136 | 4.61660895 | 225219.439 | cg02372889 | 0.02168258 | 10.7135277 | 1.41479366 | 81.1282099 |
| cg04578193 | 0.01189016 | 30.140184  | 2.12134228 | 428.233906 | cg21581821 | 0.02168464 | 9.80014264 | 1.39642473 | 68.7776388 |

|            |            |            |            |            |            |            |            |            |            |
|------------|------------|------------|------------|------------|------------|------------|------------|------------|------------|
| cg09565397 | 0.01189464 | 9.6121231  | 1.64807204 | 56.0612088 | cg19276111 | 0.02168863 | 11.2032687 | 1.4239415  | 88.1449335 |
| cg21218636 | 0.01189845 | 28.2643408 | 2.0909234  | 382.067061 | cg11948456 | 0.02168957 | 12.2510645 | 1.44266406 | 104.035711 |
| cg11700584 | 0.01189864 | 52.7715353 | 2.39987988 | 1160.40597 | cg19285119 | 0.02169055 | 153407.165 | 5.73443923 | 4103933658 |
| cg19721115 | 0.01190826 | 108.924722 | 2.81501159 | 4214.75886 | cg11670109 | 0.02169239 | 295.004554 | 2.29727023 | 37883.0865 |
| cg06304787 | 0.01191226 | 258608.881 | 15.6339825 | 4277768209 | cg01917164 | 0.02170132 | 7524.04459 | 3.6872744  | 15353141.9 |
| cg10956904 | 0.01191384 | 188601.545 | 14.579691  | 2439732284 | cg00747184 | 0.02170579 | 30528.9134 | 4.52374016 | 206027429  |
| cg03731862 | 0.01191743 | 262530.472 | 15.6767045 | 4396475592 | cg02396009 | 0.02170834 | 981444.639 | 7.51083845 | 1.2825E+11 |
| cg17430967 | 0.01191943 | 1463.24577 | 4.98981668 | 429091.551 | cg04808029 | 0.02170915 | 7.81132293 | 1.3504036  | 45.1840959 |
| cg15462862 | 0.01191917 | 49.5596908 | 2.36506159 | 1038.51966 | cg11826475 | 0.02171943 | 46.2645039 | 1.75085292 | 1222.49236 |
| cg04107003 | 0.01192317 | 19.7350673 | 1.93023285 | 201.775077 | cg19450531 | 0.0217219  | 5441.4643  | 3.51262234 | 8429466.92 |
| cg11521427 | 0.01192401 | 9.53190486 | 1.64402665 | 55.265047  | cg16522557 | 0.02172225 | 6.28688827 | 1.30802533 | 30.2172773 |
| cg02086523 | 0.011925   | 4.1595E+12 | 605.870937 | 2.86E+22   | cg10439144 | 0.02172959 | 891929692  | 20.2684815 | 3.925E+16  |
| cg00852573 | 0.01192706 | 7.86617051 | 1.57576177 | 39.2677623 | cg02249490 | 0.02173431 | 19.7545609 | 1.5457465  | 252.462273 |
| cg25697727 | 0.01192763 | 14.9180067 | 1.81452941 | 122.647186 | cg02264779 | 0.02173646 | 34.5679748 | 1.67722097 | 712.455248 |
| cg13063614 | 0.01193741 | 20.5177568 | 1.94609107 | 216.319961 | cg08468187 | 0.02173764 | 81.1657746 | 1.89969616 | 3467.86139 |
| cg08233142 | 0.01194707 | 52719.758  | 10.9697403 | 253367245  | cg20256097 | 0.02173896 | 99777.0075 | 5.36531278 | 1855521128 |
| cg06974871 | 0.01195056 | 5.02369177 | 1.42693708 | 17.6864694 | cg06659904 | 0.02174038 | 148581803  | 15.5812033 | 1.4169E+15 |
| cg01869698 | 0.0119538  | 33350.9852 | 9.91082543 | 112229624  | cg23644624 | 0.02174047 | 10.91123   | 1.4173095  | 84.0006645 |
| cg24330746 | 0.01195463 | 0.0023889  | 2.16E-05   | 0.26462385 | cg01733284 | 0.02174206 | 0.19144097 | 0.04664879 | 0.78565047 |
| cg04458368 | 0.01195545 | 10.1395693 | 1.66547171 | 61.7307785 | cg12691330 | 0.02174301 | 7.33940506 | 1.33757486 | 40.2720387 |
| cg04520793 | 0.01195651 | 234.909846 | 3.32718637 | 16585.3755 | cg08690336 | 0.02176897 | 308.475768 | 2.30573958 | 41269.7515 |
| cg04997812 | 0.01195669 | 30.9535259 | 2.12938856 | 449.951119 | cg24296484 | 0.02178255 | 13962.8585 | 4.01583027 | 48548221.8 |
| cg23747525 | 0.01195743 | 78.376652  | 2.61268921 | 2351.17883 | cg06404175 | 0.02178369 | 3.18402312 | 1.18375554 | 8.56427103 |
| cg04364728 | 0.01195886 | 11.0532564 | 1.6972905  | 71.9820663 | cg12505694 | 0.02178567 | 277661080  | 16.972627  | 4.5424E+15 |
| cg20356664 | 0.01196088 | 49086.2588 | 10.7837831 | 223433722  | cg15063443 | 0.02179424 | 9.27023043 | 1.38292108 | 62.141776  |
| cg27468419 | 0.01196431 | 6.25360287 | 1.4971065  | 26.1220889 | cg09122913 | 0.02179897 | 533.92982  | 2.49463564 | 114277.632 |
| cg10029031 | 0.01197069 | 233625985  | 69.4512    | 7.8589E+14 | cg11571563 | 0.02180125 | 9.88926468 | 1.39585191 | 70.0629882 |
| cg00028034 | 0.01197576 | 14.0969657 | 1.7899354  | 111.023249 | cg27579745 | 0.02181017 | 125.446856 | 2.01973877 | 7791.55897 |
| cg04614943 | 0.01198082 | 9362863.36 | 34.1639572 | 2.566E+12  | cg22628146 | 0.02182009 | 257.512224 | 2.24171785 | 29581.1293 |
| cg24144070 | 0.01198316 | 227.851222 | 3.30053892 | 15729.6068 | cg26518580 | 0.02183612 | 10.8811177 | 1.41464195 | 83.6951876 |

|            |            |            |            |            |            |            |            |            |            |
|------------|------------|------------|------------|------------|------------|------------|------------|------------|------------|
| cg15914589 | 0.01199207 | 515.698521 | 3.94814469 | 67359.4779 | cg18843682 | 0.02184247 | 11.0131318 | 1.41698358 | 85.5966676 |
| cg11753867 | 0.0120016  | 1935.91883 | 5.27745096 | 710149.986 | cg07223632 | 0.02184727 | 1786.04998 | 2.96702658 | 1075141.88 |
| cg24385580 | 0.01200434 | 9.88278586 | 1.65439568 | 59.0363344 | cg24514884 | 0.02185362 | 28.1208435 | 1.6233219  | 487.138034 |
| cg11856711 | 0.01200654 | 47.2246133 | 2.33286525 | 955.976387 | cg00744739 | 0.02186312 | 0.16195356 | 0.03416111 | 0.76780158 |
| cg01611862 | 0.01201079 | 89.823131  | 2.68640095 | 3003.34723 | cg05311410 | 0.02186363 | 4.98402379 | 1.26254305 | 19.6749672 |
| cg08134704 | 0.01201801 | 68646.7201 | 11.5429051 | 408248370  | cg26198823 | 0.02186894 | 0.00577516 | 7.05E-05   | 0.47336071 |
| cg23414431 | 0.01201888 | 0.00137812 | 8.07E-06   | 0.23533988 | cg07627556 | 0.02188548 | 9.20825091 | 1.37975998 | 61.4540834 |
| cg20320141 | 0.01201937 | 1429.93002 | 4.93167164 | 414605.837 | cg13340335 | 0.02188612 | 58.8906602 | 1.80569918 | 1920.64652 |
| cg19430553 | 0.01202802 | 5.89490932 | 1.47624079 | 23.5394904 | cg10552592 | 0.02189941 | 1471677.93 | 7.83003064 | 2.7661E+11 |
| cg23069367 | 0.01202866 | 5.29380883 | 1.44177704 | 19.4374103 | cg26342670 | 0.02191269 | 662.715886 | 2.56206301 | 171421.368 |
| cg12621171 | 0.01203362 | 11.5651348 | 1.71142968 | 78.1524028 | cg03699566 | 0.02191878 | 7.10132699 | 1.32818637 | 37.9681995 |
| cg10504436 | 0.01203575 | 16.4961338 | 1.8500726  | 147.087434 | cg07950803 | 0.02192582 | 0.17422262 | 0.03908853 | 0.77653277 |
| cg19973659 | 0.01204524 | 689878.133 | 19.0975597 | 2.4921E+10 | cg03189237 | 0.02193427 | 9816.08199 | 3.7806193  | 25486688.3 |
| cg04808029 | 0.01204786 | 6.9421663  | 1.52966697 | 31.5059904 | cg05782110 | 0.02193793 | 3.0872E+12 | 64.0802076 | 1.49E+23   |
| cg16532497 | 0.01205196 | 8.01113943 | 1.57836579 | 40.6612684 | cg10985065 | 0.02194445 | 0.10692239 | 0.01579611 | 0.72374778 |
| cg05044743 | 0.01205414 | 7.02399511 | 1.53343319 | 32.1738877 | cg07657064 | 0.02195296 | 9.98210919 | 1.39459849 | 71.4488828 |
| cg00470934 | 0.01205621 | 6.5989E+11 | 390.762527 | 1.11E+21   | cg19043574 | 0.02195535 | 7.05484599 | 1.32631184 | 37.5257542 |
| cg08940505 | 0.01205654 | 56.262555  | 2.41993333 | 1308.0836  | cg02577849 | 0.02196369 | 1.8134E+10 | 30.3579932 | 1.0832E+19 |
| cg24880056 | 0.01205792 | 6.2175697  | 1.49287035 | 25.8951978 | cg24801889 | 0.02196561 | 26816481.6 | 11.8373595 | 6.075E+13  |
| cg06096427 | 0.01206709 | 611523.631 | 18.549817  | 2.016E+10  | cg06164260 | 0.02196834 | 94.5809621 | 1.92943059 | 4636.37222 |
| cg16492377 | 0.01208546 | 8.82282484 | 1.61106189 | 48.3173482 | cg11267955 | 0.02197483 | 12.8022083 | 1.44515538 | 113.411015 |
| cg19948397 | 0.01208822 | 1268146.61 | 21.7068463 | 7.4087E+10 | cg06483978 | 0.02197684 | 6096.35297 | 3.52040318 | 10557177   |
| cg09355771 | 0.01209273 | 5.12353043 | 1.43010161 | 18.3557336 | cg04077706 | 0.02197874 | 22.4448622 | 1.56709313 | 321.468985 |
| cg01086810 | 0.01209607 | 118122971  | 58.5152291 | 2.3845E+14 | cg09232851 | 0.02198529 | 0.13193685 | 0.023319   | 0.74648706 |
| cg16044810 | 0.01210494 | 44.9266282 | 2.29957704 | 877.727462 | cg24960947 | 0.0219935  | 4.83944514 | 1.25549779 | 18.6541382 |
| cg15485645 | 0.0121069  | 204.845776 | 3.20487654 | 13093.1072 | cg09619624 | 0.02199595 | 4.14544144 | 1.2277379  | 13.9970305 |
| cg09505788 | 0.0121112  | 6.42322922 | 1.50220662 | 27.464846  | cg26710686 | 0.02199688 | 33352384.3 | 12.1737013 | 9.1376E+13 |
| cg19147218 | 0.01211161 | 4.49736973 | 1.3895028  | 14.5565266 | cg04362989 | 0.02200847 | 7.97588497 | 1.3490858  | 47.1539625 |
| cg03595018 | 0.01211369 | 0.14861222 | 0.0335149  | 0.65897835 | cg27227156 | 0.02201216 | 18.0280554 | 1.51733735 | 214.198103 |
| cg03005685 | 0.01211862 | 46.456855  | 2.31539019 | 932.127719 | cg23801544 | 0.02201227 | 18.7109782 | 1.52549021 | 229.500462 |

|            |            |            |            |            |            |            |            |            |            |
|------------|------------|------------|------------|------------|------------|------------|------------|------------|------------|
| cg04796763 | 0.01213797 | 3.68359201 | 1.32971299 | 10.204345  | cg00448482 | 0.02202562 | 76039.1486 | 5.05035897 | 1144859635 |
| cg07594531 | 0.01213945 | 16.8592695 | 1.85399069 | 153.309815 | cg13577076 | 0.02202668 | 8.89429893 | 1.3701044  | 57.7390697 |
| cg16194715 | 0.01214825 | 10.046213  | 1.65536152 | 60.9693982 | cg20814026 | 0.02202697 | 15.1138686 | 1.47886742 | 154.462138 |
| cg05899618 | 0.01214941 | 6.35865757 | 1.49792871 | 26.99229   | cg06286401 | 0.0220486  | 1354571.16 | 7.63203522 | 2.4042E+11 |
| cg14097171 | 0.01214957 | 11.9987909 | 1.72080088 | 83.6651026 | cg08274892 | 0.02204948 | 349216.21  | 6.27866909 | 1.9423E+10 |
| cg22662233 | 0.01215326 | 267.139272 | 3.38862828 | 21059.6692 | cg07469744 | 0.02204969 | 123.446571 | 2.00005779 | 7619.30778 |
| cg24999111 | 0.01215689 | 16345694.7 | 37.6047199 | 7.105E+12  | cg21741562 | 0.02206798 | 5.85543161 | 1.28940753 | 26.5905685 |
| cg19594360 | 0.01215924 | 2889.26933 | 5.69748915 | 1465185.28 | cg13975336 | 0.02207812 | 5752123.88 | 9.37035209 | 3.531E+12  |
| cg12111618 | 0.01216123 | 0.09215657 | 0.0142934  | 0.5941785  | cg08881995 | 0.02207949 | 1.1985E+11 | 39.1298437 | 3.67E+20   |
| cg01876338 | 0.01216414 | 7.00319058 | 1.5294589  | 32.0666859 | cg00858015 | 0.02208727 | 65079.0864 | 4.91666451 | 861414783  |
| cg08586500 | 0.01216431 | 22.1792364 | 1.96713188 | 250.068911 | cg24789467 | 0.02209104 | 19.0179075 | 1.52678906 | 236.889833 |
| cg25709824 | 0.01217046 | 8.83018714 | 1.60865147 | 48.4705397 | cg25717844 | 0.02211568 | 11.0698952 | 1.41204328 | 86.7838691 |
| cg02029441 | 0.01217532 | 68.7335481 | 2.51703334 | 1876.93208 | cg16449219 | 0.02212985 | 15.7971644 | 1.48560121 | 167.979402 |
| cg18348142 | 0.01218161 | 59.4943636 | 2.4384162  | 1451.58948 | cg13736939 | 0.0221395  | 0.07393334 | 0.00794042 | 0.68839442 |
| cg17088155 | 0.01218412 | 375470.666 | 16.4431764 | 8573661057 | cg17349352 | 0.02214961 | 14.5696    | 1.46796553 | 144.603699 |
| cg03894789 | 0.01218657 | 0.05633589 | 0.00594339 | 0.53399326 | cg18720905 | 0.02216164 | 10.988244  | 1.40954524 | 85.6599015 |
| cg16830870 | 0.01219498 | 5602338.57 | 29.604855  | 1.0602E+12 | cg07394955 | 0.02217137 | 38.7925874 | 1.68825147 | 891.374814 |
| cg04436474 | 0.01219712 | 20959.6264 | 8.75220928 | 50193719.7 | cg11299660 | 0.02217255 | 200492.175 | 5.74090906 | 7001872348 |
| cg00510149 | 0.0122071  | 7.15198189 | 1.53532016 | 33.3160771 | cg03081691 | 0.02218813 | 5.60061866 | 1.27947881 | 24.5153957 |
| cg24659411 | 0.01220771 | 75299.2997 | 11.5541216 | 490732634  | cg04586579 | 0.02220242 | 7.1562875  | 1.32489751 | 38.6538963 |
| cg22537328 | 0.01220932 | 0.00299457 | 3.18E-05   | 0.28189438 | cg00670698 | 0.02220712 | 2152327.86 | 8.03771882 | 5.7635E+11 |
| cg02446378 | 0.01221248 | 78781.2903 | 11.6628334 | 532159851  | cg27495887 | 0.02222105 | 3363.8501  | 3.18976629 | 3547434.67 |
| cg17346246 | 0.01221409 | 6.55082095 | 1.5060446  | 28.4940136 | cg14844619 | 0.02222389 | 14845812.1 | 10.5738172 | 2.0844E+13 |
| cg23816347 | 0.01221542 | 7.65202618 | 1.55786053 | 37.5858451 | cg03476370 | 0.02224444 | 2.10E-06   | 2.84E-11   | 0.15481713 |
| cg04796973 | 0.01221596 | 900934713  | 89.2718001 | 9.0923E+15 | cg01697163 | 0.02225179 | 50.1282055 | 1.74782351 | 1437.69493 |
| cg13549667 | 0.01221681 | 24.2992148 | 2.00369    | 294.682232 | cg06184463 | 0.02225827 | 221.785582 | 2.16034712 | 22768.9539 |
| cg13052102 | 0.01222763 | 10.8222349 | 1.6796135  | 69.7307855 | cg19824362 | 0.02225984 | 4272955155 | 23.6166531 | 7.731E+17  |
| cg24101049 | 0.01223459 | 8.71309317 | 1.60195939 | 47.3907099 | cg07748159 | 0.02226584 | 0.09002461 | 0.01142291 | 0.70948889 |
| cg18514705 | 0.01223837 | 37.444398  | 2.2000491  | 637.296207 | cg05216888 | 0.02226595 | 733928035  | 18.3561214 | 2.9344E+16 |
| cg23231163 | 0.01224025 | 351.144819 | 3.58061135 | 34436.2099 | cg19750232 | 0.02226898 | 272636.43  | 5.95286324 | 1.2487E+10 |

|            |            |            |            |            |            |            |            |            |            |
|------------|------------|------------|------------|------------|------------|------------|------------|------------|------------|
| cg15395441 | 0.01224081 | 10.9907883 | 1.68479437 | 71.6986175 | cg09600247 | 0.02227249 | 496.218599 | 2.42186404 | 101670.818 |
| cg04100696 | 0.01224181 | 4.69727915 | 1.40023212 | 15.7576955 | cg00357958 | 0.02227919 | 8.73374445 | 1.36171557 | 56.0163177 |
| cg02695062 | 0.01224455 | 37.9625502 | 2.20612317 | 653.25238  | cg06457011 | 0.02227945 | 7.25987586 | 1.32632277 | 39.7382889 |
| cg02045285 | 0.01224982 | 208.154045 | 3.19399781 | 13565.4778 | cg13374726 | 0.02227997 | 2965067.22 | 8.35591587 | 1.0521E+12 |
| cg14986464 | 0.01225422 | 12.6699645 | 1.7372037  | 92.4059743 | cg13356253 | 0.02228239 | 9.07669328 | 1.3691459  | 60.1735438 |
| cg08729318 | 0.01225592 | 4.06899314 | 1.35691437 | 12.2017318 | cg06038049 | 0.02228838 | 3294777626 | 22.6662044 | 4.7893E+17 |
| cg26232708 | 0.01226595 | 18418601.8 | 37.9669397 | 8.9353E+12 | cg01870903 | 0.02228973 | 3073.34622 | 3.13776636 | 3010248.67 |
| cg25456368 | 0.01226897 | 19.9990161 | 1.91775421 | 208.55678  | cg24542360 | 0.02229236 | 13493.3569 | 3.87294672 | 47010892.4 |
| cg12210040 | 0.01227442 | 367.934626 | 3.61061505 | 37493.8584 | cg04200399 | 0.02230335 | 39136.5795 | 4.50363535 | 340096774  |
| cg05376156 | 0.01227518 | 319580.549 | 15.7105548 | 6500835170 | cg13240116 | 0.02230964 | 33.1842572 | 1.64581182 | 669.089205 |
| cg15440363 | 0.01227992 | 71894.6173 | 11.3551759 | 455196473  | cg07328579 | 0.0223134  | 11.9500193 | 1.42314537 | 100.3432   |
| cg14781281 | 0.01228005 | 6.5080607  | 1.50222224 | 28.194799  | cg25121621 | 0.02231736 | 3267.79878 | 3.16076855 | 3378453.27 |
| cg16836311 | 0.01228059 | 4.74418208 | 1.40249918 | 16.0479692 | cg01424889 | 0.02232778 | 598.631353 | 2.48186871 | 144390.997 |
| cg20945607 | 0.01228419 | 79305128.1 | 51.9928999 | 1.2096E+14 | cg03513643 | 0.02234632 | 23827.2141 | 4.18495178 | 135661332  |
| cg03721195 | 0.01230002 | 10.5679066 | 1.66837038 | 66.9399619 | cg10420952 | 0.022364   | 11.3991437 | 1.41251037 | 91.9925836 |
| cg00350199 | 0.01230534 | 218.584591 | 3.21946536 | 14840.7323 | cg03756121 | 0.0223836  | 45057.7454 | 4.56963173 | 444280970  |
| cg01815035 | 0.01230604 | 44134.4779 | 10.1872979 | 191204004  | cg09231767 | 0.02238903 | 0.14127265 | 0.0263393  | 0.75772565 |
| cg15372689 | 0.01231236 | 6.91966233 | 1.52151558 | 31.4697578 | cg12796015 | 0.02240107 | 2.161E+11  | 40.3583049 | 1.16E+21   |
| cg27539986 | 0.01231519 | 5.56296454 | 1.45108549 | 21.3264999 | cg03555914 | 0.02241332 | 875.007627 | 2.60978116 | 293372.624 |
| cg09919392 | 0.01232343 | 0.07741235 | 0.0104378  | 0.57413163 | cg23062425 | 0.02241462 | 34293.1885 | 4.38703548 | 268067761  |
| cg11479568 | 0.01233058 | 17.2200783 | 1.85346687 | 159.987265 | cg07948472 | 0.02242179 | 526.995255 | 2.42814472 | 114377.037 |
| cg04142824 | 0.01233251 | 106071.366 | 12.2888934 | 915553124  | cg12106855 | 0.02242566 | 8.02132049 | 1.34268651 | 47.9200334 |
| cg10538030 | 0.01234167 | 246165412  | 65.836437  | 9.2042E+14 | cg27539234 | 0.02243876 | 206.013999 | 2.12463231 | 19976.0531 |
| cg02261765 | 0.01234296 | 7.5123255  | 1.54802963 | 36.4560428 | cg08932052 | 0.0224574  | 928237.975 | 6.97223818 | 1.2358E+11 |
| cg13395333 | 0.01234593 | 803.256604 | 4.2599173  | 151463.309 | cg25625860 | 0.02247672 | 3538827.01 | 8.40819004 | 1.4894E+12 |
| cg19388996 | 0.01234748 | 410.404513 | 3.68276432 | 45735.1733 | cg26087598 | 0.02247894 | 871816849  | 18.2922117 | 4.1551E+16 |
| cg17471836 | 0.0123508  | 6.86926847 | 1.51809382 | 31.08296   | cg06826870 | 0.02248185 | 0.12846018 | 0.02204704 | 0.74849131 |
| cg09578614 | 0.0123647  | 0.00417427 | 5.71E-05   | 0.30538441 | cg18413449 | 0.02248471 | 8.84562356 | 1.36028631 | 57.5210201 |
| cg06710082 | 0.01237241 | 4.39380158 | 1.37763108 | 14.0135429 | cg09858237 | 0.02248595 | 12.3736116 | 1.42625377 | 107.348543 |
| cg25346720 | 0.0123777  | 9698401.74 | 32.496207  | 2.8945E+12 | cg22607959 | 0.02248756 | 18511.6826 | 4.00194063 | 85629054.3 |

|            |            |            |            |            |            |            |            |            |            |
|------------|------------|------------|------------|------------|------------|------------|------------|------------|------------|
| cg18308285 | 0.01238218 | 16.5045379 | 1.83410803 | 148.518936 | cg10008501 | 0.02248904 | 11.244599  | 1.40705571 | 89.862118  |
| cg11790979 | 0.0123845  | 16499.7853 | 8.17243309 | 33312345.7 | cg20162652 | 0.02249627 | 4.89234808 | 1.2510489  | 19.1320017 |
| cg18235734 | 0.01238528 | 6.59496198 | 1.50387378 | 28.9209932 | cg13144594 | 0.02252652 | 406.218665 | 2.33093581 | 70792.8563 |
| cg12518535 | 0.01239006 | 13.8292183 | 1.76493055 | 108.359663 | cg21686379 | 0.02254062 | 21.0187162 | 1.53537411 | 287.738621 |
| cg23736297 | 0.01239133 | 30.2276833 | 2.0900655  | 437.169475 | cg01620672 | 0.02254454 | 0.09798793 | 0.01331546 | 0.7210892  |
| cg05104048 | 0.0123919  | 3.4788E+10 | 190.409407 | 6.3557E+18 | cg10043155 | 0.02256335 | 156.678612 | 2.0357537  | 12058.5253 |
| cg13325330 | 0.01239847 | 87881.5634 | 11.7186101 | 659051639  | cg11806528 | 0.02257411 | 8.11724659 | 1.34228544 | 49.0876905 |
| cg10729325 | 0.01241405 | 27817.1043 | 9.12526216 | 84796609.7 | cg05096838 | 0.02257571 | 6356.22684 | 3.42464802 | 11797305.7 |
| cg12046254 | 0.01241683 | 10.1355498 | 1.64930132 | 62.2865987 | cg07363112 | 0.02257872 | 7950.62911 | 3.53349801 | 17889497.3 |
| cg09363539 | 0.01241974 | 59.309341  | 2.41553651 | 1456.23878 | cg18536827 | 0.02257904 | 0.16178872 | 0.03381255 | 0.77413834 |
| cg04917391 | 0.01243314 | 7.77769538 | 1.55713628 | 38.8485878 | cg03314195 | 0.02258072 | 10.6459372 | 1.39430743 | 81.2847848 |
| cg19025034 | 0.01243533 | 58.511748  | 2.40711697 | 1422.2926  | cg08887028 | 0.02258124 | 0.02604417 | 0.00113258 | 0.59889689 |
| cg17777561 | 0.01243858 | 268.869704 | 3.34501336 | 21611.5483 | cg07952391 | 0.02258548 | 12.8920698 | 1.432218   | 116.047601 |
| cg03319638 | 0.01243997 | 15.6701901 | 1.81105963 | 135.586291 | cg02124724 | 0.02258963 | 25.6319352 | 1.577276   | 416.538452 |
| cg19901005 | 0.01247299 | 9.78708575 | 1.63501038 | 58.5849783 | cg15837832 | 0.02259076 | 1853.16771 | 2.87778332 | 1193359.68 |
| cg15287092 | 0.01248059 | 33.9080423 | 2.13663401 | 538.115244 | cg07352798 | 0.02259743 | 122.472452 | 1.96438776 | 7635.71321 |
| cg00917251 | 0.01248438 | 270.8277   | 3.34259308 | 21943.3359 | cg07205462 | 0.02260529 | 793093806  | 17.7543363 | 3.5428E+16 |
| cg20138604 | 0.01249772 | 499868.245 | 16.8673306 | 1.4814E+10 | cg08964780 | 0.02263037 | 6.59146533 | 1.30268596 | 33.3521789 |
| cg05022059 | 0.01249924 | 7.18352345 | 1.52886909 | 33.7524054 | cg01610602 | 0.02263485 | 13796098.4 | 10.0219309 | 1.8992E+13 |
| cg06522557 | 0.0125059  | 268.938683 | 3.33397689 | 21694.2161 | cg23280754 | 0.02264385 | 10.6780556 | 1.393573   | 81.8190882 |
| cg22276332 | 0.01250677 | 1223.48645 | 4.61908425 | 324072.697 | cg01657408 | 0.02264552 | 27520.0382 | 4.1890101  | 180795101  |
| cg05662500 | 0.01250895 | 1011.04802 | 4.43272137 | 230607.342 | cg25193742 | 0.02264792 | 835724.121 | 6.75688383 | 1.0337E+11 |
| cg07023915 | 0.01251091 | 1318801.72 | 20.751245  | 8.3814E+10 | cg04054731 | 0.02265168 | 16.8391989 | 1.48522385 | 190.919787 |
| cg27009812 | 0.01251124 | 12.0630328 | 1.70892501 | 85.1510507 | cg17217295 | 0.02265625 | 33088.5874 | 4.29554007 | 254881714  |
| cg13875008 | 0.01251137 | 0.10049473 | 0.01655839 | 0.60991361 | cg02272258 | 0.02268662 | 403083.335 | 6.08136089 | 2.6717E+10 |
| cg26274889 | 0.01251676 | 1.663E+12  | 425.857733 | 6.49E+21   | cg05166976 | 0.02268922 | 0.08643639 | 0.01052192 | 0.71006522 |
| cg26615259 | 0.01251887 | 304.817402 | 3.42280235 | 27145.4904 | cg19230459 | 0.02270088 | 26510.9183 | 4.15225157 | 169264501  |
| cg18664900 | 0.01251981 | 4425093.61 | 26.8940308 | 7.281E+11  | cg05596265 | 0.02270106 | 23.6252663 | 1.55582969 | 358.749552 |
| cg10883583 | 0.01252375 | 7159742.41 | 29.8105473 | 1.7196E+12 | cg01319727 | 0.02270348 | 2148904.87 | 7.67327263 | 6.018E+11  |
| cg05113709 | 0.01252644 | 847.354165 | 4.26290749 | 168431.776 | cg15004702 | 0.02270724 | 10289.8015 | 3.63640174 | 29116699.1 |



|            |            |            |            |            |            |            |            |            |            |
|------------|------------|------------|------------|------------|------------|------------|------------|------------|------------|
| cg19431506 | 0.01252654 | 508.001339 | 3.81871734 | 67579.0685 | cg01957751 | 0.02270966 | 0.04120924 | 0.00265156 | 0.64045433 |
| cg09629193 | 0.01253153 | 1725.82495 | 4.96589719 | 599785.222 | cg19245296 | 0.02271591 | 154278.037 | 5.30517843 | 4486505572 |
| cg04408790 | 0.01253388 | 27704752   | 39.8192935 | 1.9276E+13 | cg00082497 | 0.02272602 | 20.9371221 | 1.52904583 | 286.69061  |
| cg11556929 | 0.0125424  | 7.3684E+10 | 216.561263 | 2.5071E+19 | cg17468224 | 0.02272855 | 6745.04873 | 3.42392492 | 13287581.8 |
| cg20986726 | 0.01254677 | 157202.112 | 13.0798941 | 1889350450 | cg18795461 | 0.02273362 | 6.1966339  | 1.28990902 | 29.7682015 |
| cg13484341 | 0.01255219 | 18.8928305 | 1.88012422 | 189.84865  | cg24698371 | 0.02275391 | 154902626  | 13.8679246 | 1.7302E+15 |
| cg24398450 | 0.01255304 | 8.01596319 | 1.5638308  | 41.0886304 | cg25543401 | 0.02275807 | 98593.6408 | 4.96826037 | 1956561307 |
| cg13255056 | 0.01255499 | 388725.12  | 15.8738435 | 9519258420 | cg26233374 | 0.0227598  | 22.5173912 | 1.54362903 | 328.468108 |
| cg23123694 | 0.01256009 | 10766.3499 | 7.34387227 | 15783810.7 | cg05654163 | 0.02277913 | 10.2518622 | 1.38287724 | 76.0014522 |
| cg11059483 | 0.01256114 | 9.93150612 | 1.63722805 | 60.2450061 | cg25397562 | 0.02278141 | 7.07E-13   | 2.46E-23   | 0.02031872 |
| cg17715556 | 0.0125774  | 8.33258859 | 1.57617602 | 44.0509383 | cg05045781 | 0.02278434 | 4820.96261 | 3.25732959 | 7135194.6  |
| cg14383422 | 0.01257753 | 4.16104489 | 1.35794971 | 12.7503209 | cg17791651 | 0.02278451 | 26.6207669 | 1.57926398 | 448.731331 |
| cg12353788 | 0.01258014 | 37.7602215 | 2.17972824 | 654.133986 | cg17198397 | 0.02278519 | 0.07570927 | 0.00821043 | 0.69812307 |
| cg08062526 | 0.01258253 | 1.5193E+11 | 250.689917 | 9.2078E+19 | cg12099952 | 0.02279301 | 4.77279065 | 1.24302281 | 18.3259152 |
| cg06641593 | 0.01258668 | 0.08490196 | 0.0122351  | 0.5891526  | cg26779912 | 0.0228064  | 1920526.67 | 7.48279733 | 4.9292E+11 |
| cg02272258 | 0.01259158 | 85791.9284 | 11.4320886 | 643824172  | cg03072378 | 0.02280925 | 103.371107 | 1.90624854 | 5605.55749 |
| cg14265075 | 0.01259309 | 46.5478427 | 2.27881273 | 950.802859 | cg15204874 | 0.02281185 | 11.9134415 | 1.41138841 | 100.560616 |
| cg02281514 | 0.01259694 | 50.4762828 | 2.3184469  | 1098.9491  | cg16184803 | 0.02282023 | 24.0277162 | 1.55576922 | 371.09048  |
| cg21496187 | 0.01260724 | 10.2169912 | 1.64565723 | 63.4317447 | cg07331806 | 0.02283609 | 39.1476392 | 1.66439527 | 920.777466 |
| cg25367558 | 0.01261635 | 0.0037676  | 4.69E-05   | 0.30244538 | cg07916003 | 0.02284003 | 2392051565 | 20.0748392 | 2.8503E+17 |
| cg09490603 | 0.01262522 | 5.20379093 | 1.42371366 | 19.0202854 | cg08817644 | 0.02284448 | 41.9543476 | 1.68014926 | 1047.62554 |
| cg25035631 | 0.01262868 | 5.25611568 | 1.42669511 | 19.3641597 | cg05390144 | 0.02285643 | 75.5509428 | 1.8225563  | 3131.83464 |
| cg09125320 | 0.01263139 | 9.79731301 | 1.63013245 | 58.8831555 | cg03476195 | 0.02286374 | 6.08767746 | 1.28480679 | 28.8446614 |
| cg16914989 | 0.01263297 | 182.885089 | 3.05043717 | 10964.6434 | cg01907051 | 0.02287138 | 12.6248719 | 1.4214621  | 112.129188 |
| cg21644713 | 0.01263482 | 14516.6918 | 7.78112331 | 27082766   | cg19217130 | 0.02287149 | 0.15197629 | 0.02999405 | 0.77004575 |
| cg00927495 | 0.01263592 | 7.0915268  | 1.52101087 | 33.0633747 | cg16328610 | 0.02287925 | 5315248.66 | 8.55984334 | 3.3005E+12 |
| cg21621104 | 0.01263682 | 5.37256078 | 1.43323211 | 20.1393823 | cg00935430 | 0.02287943 | 8598869000 | 23.8428214 | 3.1012E+18 |
| cg10539808 | 0.01263866 | 15.2611457 | 1.79209874 | 129.96079  | cg20655350 | 0.02288767 | 12.4738097 | 1.41872234 | 109.673277 |
| cg13696236 | 0.01264451 | 12.0085983 | 1.70224957 | 84.7152119 | cg07565021 | 0.02289251 | 116.127563 | 1.93251026 | 6978.2868  |
| cg06310422 | 0.01264754 | 22.3907728 | 1.94488286 | 257.777328 | cg01711077 | 0.02289272 | 69.0604703 | 1.79822911 | 2652.24744 |

|            |            |            |            |            |            |            |            |            |            |
|------------|------------|------------|------------|------------|------------|------------|------------|------------|------------|
| cg16412956 | 0.01265197 | 17.9912979 | 1.85572805 | 174.425774 | cg23032421 | 0.02290362 | 13.1838126 | 1.42927792 | 121.6089   |
| cg17566394 | 0.01265287 | 0.01398124 | 0.00048734 | 0.40111017 | cg18378494 | 0.02291262 | 370.294842 | 2.26765623 | 60466.9563 |
| cg19815376 | 0.01265749 | 9.76965786 | 1.62828852 | 58.6175078 | cg22377027 | 0.02291435 | 49553.3839 | 4.46592911 | 549838072  |
| cg25061763 | 0.01265834 | 19248.5081 | 8.24866625 | 44916966.2 | cg09447457 | 0.02291884 | 5.491E+13  | 79.7095561 | 3.78E+25   |
| cg06236061 | 0.01266101 | 35.0023951 | 2.13908741 | 572.752498 | cg11142466 | 0.02293369 | 1075469474 | 17.7455676 | 6.5179E+16 |
| cg19844955 | 0.01266483 | 0.10541807 | 0.01797883 | 0.61811422 | cg25479082 | 0.02293638 | 30784.4054 | 4.17512764 | 226982190  |
| cg00454770 | 0.01267313 | 24.0896411 | 1.97413615 | 293.956831 | cg00993830 | 0.02297012 | 8.12718241 | 1.3354808  | 49.4586622 |
| cg07405126 | 0.0126902  | 26748.5149 | 8.82475451 | 81076821.9 | cg23923856 | 0.022972   | 5.41243337 | 1.26256178 | 23.2023774 |
| cg02647835 | 0.01269817 | 4.7576646  | 1.39523845 | 16.2233003 | cg12889538 | 0.02298607 | 14.6743405 | 1.44861286 | 148.649976 |
| cg11079583 | 0.01269984 | 14.1386547 | 1.76050583 | 113.547796 | cg27264345 | 0.02299398 | 39.6006105 | 1.66095691 | 944.15956  |
| cg12744185 | 0.01270107 | 22.9244698 | 1.95181653 | 269.252417 | cg19035395 | 0.02299465 | 14.1892226 | 1.44170263 | 139.650185 |
| cg09597767 | 0.01270188 | 0.0093401  | 0.00023661 | 0.3686905  | cg23616741 | 0.02299833 | 12.9722985 | 1.42389886 | 118.182923 |
| cg06840154 | 0.01270237 | 19.3519924 | 1.88241571 | 198.946284 | cg27611263 | 0.02299837 | 11.4194201 | 1.39908224 | 93.2062117 |
| cg23432673 | 0.0127036  | 977994.98  | 19.005087  | 5.0327E+10 | cg01398529 | 0.02299851 | 57623954.3 | 11.7526929 | 2.8253E+14 |
| cg01240599 | 0.01270524 | 39.6839019 | 2.19413367 | 717.737524 | cg02081427 | 0.02300949 | 63827.3778 | 4.59459367 | 886679964  |
| cg04655372 | 0.01270815 | 4.7728E+10 | 190.269703 | 1.20E+19   | cg23269029 | 0.02302329 | 16.8466615 | 1.47549246 | 192.349342 |
| cg08944390 | 0.01270916 | 50633539.3 | 44.0994945 | 5.8136E+13 | cg24413842 | 0.02302624 | 0.14423846 | 0.02716268 | 0.76593076 |
| cg13913149 | 0.01270921 | 107754.101 | 11.86094   | 978922930  | cg25278941 | 0.02302695 | 7.04737792 | 1.30853596 | 37.9550408 |
| cg27214030 | 0.01270922 | 464.480911 | 3.70881764 | 58170.1603 | cg03341758 | 0.02302711 | 73237908.8 | 12.1082141 | 4.4299E+14 |
| cg00108715 | 0.01271567 | 63.0189286 | 2.42089172 | 1640.46386 | cg06580065 | 0.02302976 | 48685.3901 | 4.42017859 | 536237884  |
| cg22220806 | 0.01271729 | 0.13267794 | 0.0270872  | 0.64988016 | cg19183317 | 0.02303162 | 12.4275752 | 1.41475327 | 109.16718  |
| cg10059687 | 0.01272026 | 25.4417229 | 1.99462817 | 324.512243 | cg01879488 | 0.02303379 | 90.1469674 | 1.85840713 | 4372.81777 |
| cg18469624 | 0.01272571 | 13887.4258 | 7.64883665 | 25214369.6 | cg23752923 | 0.02304047 | 166.495605 | 2.02176289 | 13711.1957 |
| cg02556718 | 0.01272814 | 31417.8683 | 9.10172588 | 108450030  | cg19663209 | 0.0230406  | 7808.65679 | 3.4334417  | 17759183.4 |
| cg18795461 | 0.01273065 | 5.82576719 | 1.45616899 | 23.3074345 | cg14512004 | 0.02304545 | 3726723006 | 20.7489365 | 6.6936E+17 |
| cg07575518 | 0.01273698 | 17.1320583 | 1.83248898 | 160.168724 | cg13760347 | 0.02305156 | 685280482  | 16.4232368 | 2.8594E+16 |
| cg04739149 | 0.01274784 | 13920894.2 | 33.2894948 | 5.8214E+12 | cg19489174 | 0.02305449 | 19.9774787 | 1.50965545 | 264.36473  |
| cg02605237 | 0.01275878 | 45008.1232 | 9.7985645  | 206737544  | cg23528791 | 0.02305565 | 12.1612944 | 1.41000773 | 104.890972 |
| cg01664011 | 0.01276005 | 4674401.89 | 26.3386801 | 8.2958E+11 | cg17895873 | 0.02305744 | 2.6867E+10 | 27.1802329 | 2.6557E+19 |
| cg20759486 | 0.01276153 | 10.8456655 | 1.66144937 | 70.7987024 | cg19786920 | 0.02306471 | 34.5082803 | 1.62715473 | 731.842758 |

|            |            |            |            |            |            |            |            |            |            |
|------------|------------|------------|------------|------------|------------|------------|------------|------------|------------|
| cg23696808 | 0.01276746 | 5714.19042 | 6.30890332 | 5175538.53 | cg19678561 | 0.02306886 | 8923345.93 | 9.02309335 | 8.8247E+12 |
| cg20136444 | 0.01276945 | 4.8206E+14 | 1337.08313 | 1.74E+26   | cg02067430 | 0.02307094 | 4.552E+10  | 29.1634252 | 7.105E+19  |
| cg18774755 | 0.01277012 | 26.7793605 | 2.01364324 | 356.137637 | cg00534700 | 0.02307189 | 6177.47535 | 3.31877484 | 11498581.1 |
| cg16751098 | 0.01277402 | 14563809.1 | 33.4837965 | 6.3345E+12 | cg07891064 | 0.02310485 | 5.59744365 | 1.2666089  | 24.7364245 |
| cg09703123 | 0.01277472 | 85.5198627 | 2.57788877 | 2837.06845 | cg11424962 | 0.02312081 | 247.131296 | 2.12876845 | 28689.7702 |
| cg25716814 | 0.01277525 | 8.44228567 | 1.57472251 | 45.2601565 | cg09375033 | 0.02312733 | 0.14227432 | 0.0264451  | 0.76543409 |
| cg06727269 | 0.01277574 | 798302.218 | 18.0424617 | 3.5321E+10 | cg01047631 | 0.02313643 | 6.49011399 | 1.29211097 | 32.5990418 |
| cg12636538 | 0.01277576 | 69934.8894 | 10.7450396 | 455176429  | cg22710329 | 0.02314306 | 3031.50072 | 2.99870198 | 3064658.2  |
| cg07220448 | 0.01278294 | 8.20334787 | 1.56490553 | 43.0025424 | cg11124980 | 0.02315209 | 708.302658 | 2.45625957 | 204250.667 |
| cg15085390 | 0.01278451 | 36453.1668 | 9.34605961 | 142181136  | cg19248557 | 0.02315838 | 37.7187252 | 1.64366112 | 865.569071 |
| cg22896904 | 0.0127858  | 3.2719E+18 | 8695.6044  | 1.23E+33   | cg01937803 | 0.02316246 | 27.3440669 | 1.57272607 | 475.415275 |
| cg16403299 | 0.01279261 | 71.4359402 | 2.47934674 | 2058.24118 | cg27317433 | 0.02316342 | 12.9770176 | 1.42018679 | 118.578053 |
| cg06404175 | 0.01279576 | 2.84758551 | 1.24927164 | 6.4907767  | cg20607798 | 0.02316538 | 11.1961647 | 1.39174382 | 90.0698126 |
| cg03289906 | 0.01280072 | 19.5516524 | 1.88169477 | 203.150435 | cg01909364 | 0.02317451 | 9.84563092 | 1.36729727 | 70.8963958 |
| cg10334121 | 0.01280216 | 6.11969433 | 1.4698577  | 25.4791051 | cg00648423 | 0.02318098 | 55.4176133 | 1.73156127 | 1773.60854 |
| cg04171065 | 0.01280857 | 6.59551938 | 1.49328772 | 29.1309405 | cg17404605 | 0.02318679 | 3382.43268 | 3.03725642 | 3766837.33 |
| cg25624927 | 0.01281031 | 9765.2146  | 7.0470094  | 13531898.5 | cg01766718 | 0.02320104 | 0.13153101 | 0.02282524 | 0.75795066 |
| cg16613143 | 0.01281391 | 96545.8369 | 11.4642395 | 813058612  | cg02688226 | 0.02320666 | 145134.45  | 5.07017742 | 4154491438 |
| cg20785136 | 0.01281758 | 79.8234686 | 2.53615346 | 2512.38193 | cg19873719 | 0.02320683 | 64731.689  | 4.54071186 | 922804989  |
| cg01046287 | 0.0128188  | 177.207901 | 3.00432166 | 10452.4894 | cg03519879 | 0.0232089  | 58.298845  | 1.74236348 | 1950.65805 |
| cg26529833 | 0.01283348 | 8.5202729  | 1.57607982 | 46.0605164 | cg13264159 | 0.02321202 | 890094.362 | 6.4924251  | 1.2203E+11 |
| cg23859635 | 0.01284227 | 9.91969165 | 1.62751772 | 60.4603448 | cg22767408 | 0.02322687 | 1597469.27 | 7.02284909 | 3.6337E+11 |
| cg08615333 | 0.01284464 | 7.66605779 | 1.54080954 | 38.1412761 | cg21834204 | 0.02322691 | 26.2481598 | 1.56188201 | 441.112636 |
| cg03476370 | 0.01284631 | 3.41E-06   | 1.68E-10   | 0.06913392 | cg22645427 | 0.02323181 | 5.19941031 | 1.25220697 | 21.5889771 |
| cg12946524 | 0.01285076 | 43584.9552 | 9.64811367 | 196893236  | cg03431903 | 0.02324038 | 626935.599 | 6.17435816 | 6.3658E+10 |
| cg13749822 | 0.01285126 | 6.95390269 | 1.50908154 | 32.0438369 | cg12527260 | 0.0232407  | 35.6749577 | 1.62816807 | 781.677659 |
| cg03107888 | 0.01286014 | 8.50468489 | 1.57467929 | 45.9329501 | cg24717875 | 0.02325401 | 33.7018442 | 1.61511018 | 703.242611 |
| cg06731484 | 0.01286213 | 7.04160371 | 1.51281901 | 32.7760179 | cg11121935 | 0.02326845 | 424.367018 | 2.27978684 | 78993.0717 |
| cg18464137 | 0.01286351 | 12.7550707 | 1.71591807 | 94.8132851 | cg25353054 | 0.02327779 | 910998421  | 16.5862565 | 5.0036E+16 |
| cg23316360 | 0.01286711 | 8.06188799 | 1.55672272 | 41.7505553 | cg02791024 | 0.02327919 | 830486116  | 16.3756771 | 4.2118E+16 |

|            |            |            |            |            |            |            |            |            |            |
|------------|------------|------------|------------|------------|------------|------------|------------|------------|------------|
| cg03613618 | 0.01287224 | 9.66749294 | 1.61768142 | 57.7743048 | cg14441271 | 0.02328018 | 12.7878305 | 1.41469485 | 115.59285  |
| cg09671955 | 0.01287891 | 6.04533622 | 1.46426808 | 24.958606  | cg14400886 | 0.02329404 | 7.67152635 | 1.31940408 | 44.6052255 |
| cg04152196 | 0.01287963 | 34.0752973 | 2.1124578  | 549.656371 | cg06856563 | 0.0233063  | 4.42E-08   | 1.96E-14   | 0.10002382 |
| cg01583595 | 0.01288297 | 0.16596348 | 0.04030086 | 0.68345638 | cg14311481 | 0.02331013 | 28.0836815 | 1.57361841 | 501.197218 |
| cg06243556 | 0.01289009 | 14.2272196 | 1.75504726 | 115.332379 | cg04274259 | 0.02332677 | 13438.034  | 3.63719481 | 49648359.9 |
| cg03921416 | 0.01290351 | 96.4722416 | 2.63125741 | 3537.05166 | cg09655862 | 0.02332765 | 7.43387312 | 1.31321392 | 42.0818489 |
| cg26333513 | 0.01290923 | 21.9484702 | 1.92288105 | 250.527897 | cg08413402 | 0.02333999 | 3792480.64 | 7.81798796 | 1.8397E+12 |
| cg24498180 | 0.01291033 | 243.428803 | 3.19986212 | 18518.7923 | cg01859118 | 0.023346   | 38835.4308 | 4.19584629 | 359448508  |
| cg15971010 | 0.01291285 | 4.54840865 | 1.37796073 | 15.0135057 | cg18105529 | 0.02335475 | 34.5812604 | 1.61717535 | 739.476749 |
| cg10498682 | 0.01291406 | 0.01353526 | 0.0004554  | 0.40229271 | cg07468655 | 0.02335765 | 0.08865894 | 0.01091884 | 0.71989389 |
| cg21544415 | 0.01291623 | 6.62831369 | 1.49219913 | 29.4428148 | cg19326232 | 0.02337176 | 6.70E+23   | 1696.83605 | 2.64E+44   |
| cg16754665 | 0.01292047 | 50.4108692 | 2.29207158 | 1108.7157  | cg01157467 | 0.02338449 | 780.566425 | 2.46514986 | 247158.988 |
| cg03844154 | 0.01293142 | 11.9826235 | 1.69083793 | 84.9184087 | cg16478733 | 0.02340292 | 85.7604249 | 1.82677757 | 4026.13355 |
| cg03875678 | 0.01293206 | 0.08446028 | 0.01203096 | 0.59293177 | cg19426955 | 0.02340775 | 19.6832555 | 1.49667406 | 258.861001 |
| cg15185033 | 0.01293697 | 241.203806 | 3.18957491 | 18240.4482 | cg23890469 | 0.0234272  | 47.2607337 | 1.68423714 | 1326.16536 |
| cg19047868 | 0.01293813 | 7.45030416 | 1.5289885  | 36.3031063 | cg01783195 | 0.02343404 | 217.732054 | 2.07015237 | 22900.366  |
| cg08406071 | 0.01294515 | 182644.13  | 12.9461902 | 2576733203 | cg26088994 | 0.0234611  | 699400.277 | 6.15189602 | 7.9514E+10 |
| cg12634124 | 0.01294804 | 277386795  | 60.8689584 | 1.2641E+15 | cg03004714 | 0.02348346 | 8.56632717 | 1.33595756 | 54.9283626 |
| cg12059147 | 0.01294979 | 12.3694811 | 1.70155251 | 89.9202714 | cg13397067 | 0.02348942 | 195737.3   | 5.16911237 | 7411928383 |
| cg03301200 | 0.0129533  | 3.45938572 | 1.29983877 | 9.20679537 | cg11802732 | 0.02350298 | 74053908.2 | 11.4893818 | 4.7731E+14 |
| cg14133339 | 0.01295759 | 23566499.8 | 36.097472  | 1.5386E+13 | cg23793040 | 0.0235045  | 6.11013182 | 1.27614604 | 29.2550457 |
| cg04439516 | 0.01296135 | 1089634.2  | 18.8470078 | 6.2997E+10 | cg16124934 | 0.0235073  | 11.7703484 | 1.39393676 | 99.3883692 |
| cg09653271 | 0.01296158 | 17690.2889 | 7.89281839 | 39649502.5 | cg27167413 | 0.02351299 | 2431.83958 | 2.85752465 | 2069568.77 |
| cg06912515 | 0.01296175 | 6.01183391 | 1.46064733 | 24.7439244 | cg22974920 | 0.02351488 | 7.06E-13   | 2.16E-23   | 0.02310476 |
| cg11072113 | 0.01296599 | 14.2376248 | 1.7522319  | 115.68672  | cg26755793 | 0.02351977 | 15.8361802 | 1.45046914 | 172.898959 |
| cg21474786 | 0.01296745 | 10.0300642 | 1.6272345  | 61.8240259 | cg24101049 | 0.02352765 | 10.0623795 | 1.36440727 | 74.2091339 |
| cg17853833 | 0.01296829 | 1147437875 | 81.8691185 | 1.6082E+16 | cg26915924 | 0.0235297  | 0.09161545 | 0.01157772 | 0.72496062 |
| cg06561166 | 0.01296897 | 804.106215 | 4.10667726 | 157447.679 | cg09551172 | 0.02353588 | 2227808.39 | 7.14456794 | 6.9467E+11 |
| cg01885635 | 0.01297485 | 126.464694 | 2.77809726 | 5756.93269 | cg05947740 | 0.02353722 | 18.0926079 | 1.47625134 | 221.738977 |
| cg12691382 | 0.01297574 | 11.3218543 | 1.66910911 | 76.7980855 | cg25203092 | 0.02354277 | 17431712   | 9.41591179 | 3.2271E+13 |

|            |            |            |            |            |            |            |            |            |            |
|------------|------------|------------|------------|------------|------------|------------|------------|------------|------------|
| cg05586209 | 0.01299187 | 249.589131 | 3.20422915 | 19441.4105 | cg13538006 | 0.02355055 | 81.5386259 | 1.80700761 | 3679.31352 |
| cg00577560 | 0.01300158 | 13.6619684 | 1.73561847 | 107.540559 | cg10205925 | 0.02355624 | 132.646824 | 1.92883989 | 9122.15679 |
| cg08339719 | 0.01300259 | 22227.5529 | 8.25322353 | 59863168.2 | cg26392523 | 0.02355832 | 2.7261E+10 | 25.2597349 | 2.942E+19  |
| cg03087607 | 0.01301191 | 8.16325322 | 1.55671655 | 42.807217  | cg13348059 | 0.02356432 | 5.29582058 | 1.25101411 | 22.4183846 |
| cg08847885 | 0.01302223 | 876861.084 | 17.8715792 | 4.3023E+10 | cg21396517 | 0.0235769  | 7.40788727 | 1.3085115  | 41.9383352 |
| cg08432727 | 0.01302315 | 6.30685202 | 1.47405071 | 26.9844058 | cg16914989 | 0.02357769 | 346.79072  | 2.19307277 | 54838.036  |
| cg05485462 | 0.01303072 | 12.1874304 | 1.6932429  | 87.7212943 | cg27147545 | 0.0235778  | 98.7735317 | 1.85275333 | 5265.79034 |
| cg00846502 | 0.01303117 | 0.11053686 | 0.01942992 | 0.62884457 | cg03366850 | 0.02361327 | 9.52244124 | 1.35269362 | 67.0343127 |
| cg01122672 | 0.01303907 | 259.464303 | 3.22320417 | 20886.5839 | cg04544093 | 0.02362528 | 258288603  | 13.3967708 | 4.9798E+15 |
| cg17833106 | 0.01304732 | 9.50495234 | 1.60634486 | 56.2420444 | cg01730534 | 0.02362567 | 25831.4404 | 3.90032493 | 171078904  |
| cg18154158 | 0.01304999 | 0.07046837 | 0.00867832 | 0.5722063  | cg14886640 | 0.02364362 | 481.111666 | 2.28583405 | 101262.134 |
| cg00370179 | 0.01305319 | 15.0049716 | 1.76812864 | 127.337552 | cg16400495 | 0.02364383 | 8.51026972 | 1.33192797 | 54.3758313 |
| cg10634317 | 0.01305822 | 1.55E-08   | 1.06E-14   | 0.022754   | cg26229990 | 0.02364859 | 27.2077659 | 1.55597772 | 475.753936 |
| cg08048656 | 0.01306081 | 106017640  | 48.7798777 | 2.3042E+14 | cg10938446 | 0.02365845 | 0.01212663 | 0.00026535 | 0.55419976 |
| cg26565223 | 0.01306133 | 0.11053037 | 0.01941667 | 0.62919969 | cg04152610 | 0.02366797 | 32.7675351 | 1.59451234 | 673.379146 |
| cg01462607 | 0.01306576 | 7.81330855 | 1.54092283 | 39.617682  | cg01024168 | 0.02367298 | 7.8007943  | 1.31600929 | 46.2400928 |
| cg07571451 | 0.01306765 | 0.01055321 | 0.00029004 | 0.38398221 | cg18340446 | 0.02367649 | 1.0678E+13 | 55.1232323 | 2.07E+24   |
| cg08474990 | 0.01307235 | 6110208.94 | 26.7211003 | 1.3972E+12 | cg12130607 | 0.02368983 | 0.11956826 | 0.01898618 | 0.7529989  |
| cg19744122 | 0.01307278 | 4.9879E+13 | 758.768311 | 3.28E+24   | cg10052561 | 0.02371005 | 6.45275594 | 1.28250366 | 32.4662304 |
| cg00504134 | 0.01308674 | 728.313943 | 3.99467589 | 132787.043 | cg16385703 | 0.02371186 | 182056.934 | 5.03388865 | 6584318704 |
| cg17633033 | 0.01308965 | 883297.709 | 17.7562965 | 4.394E+10  | cg05020775 | 0.02372988 | 377.881219 | 2.20610103 | 64726.9613 |
| cg20248204 | 0.01309338 | 17.512558  | 1.82474956 | 168.072208 | cg22323778 | 0.02374696 | 730962404  | 15.1648906 | 3.5233E+16 |
| cg08947153 | 0.01309491 | 131915824  | 50.7933175 | 3.426E+14  | cg15699226 | 0.02375962 | 11.5599388 | 1.38523204 | 96.4691703 |
| cg04111314 | 0.01309569 | 11.7654501 | 1.67838802 | 82.4754548 | cg23425533 | 0.0237654  | 8.27870452 | 1.32490658 | 51.7296461 |
| cg19896881 | 0.01310014 | 17460.3352 | 7.77899071 | 39190598.9 | cg20809087 | 0.02377443 | 8.45373234 | 1.3284427  | 53.796517  |
| cg07174177 | 0.01310664 | 13.4890034 | 1.72685832 | 105.366613 | cg13768304 | 0.02377485 | 756.542414 | 2.41556191 | 236945.458 |
| cg02865149 | 0.01310946 | 47378694.3 | 40.8714153 | 5.4922E+13 | cg09687332 | 0.02377631 | 193360947  | 12.658899  | 2.9535E+15 |
| cg01323381 | 0.01312852 | 5.57221255 | 1.43383349 | 21.6549223 | cg00931235 | 0.02378167 | 2.6535E+11 | 33.0684759 | 2.13E+21   |
| cg13340335 | 0.01313198 | 34.0810994 | 2.09622905 | 554.100391 | cg26139475 | 0.02378243 | 438074282  | 14.1033092 | 1.3607E+16 |
| cg03922997 | 0.0131349  | 0.00773994 | 0.00016605 | 0.36076488 | cg05967404 | 0.02378511 | 10.79093   | 1.3720789  | 84.8669636 |

|            |            |            |            |            |            |            |            |            |            |
|------------|------------|------------|------------|------------|------------|------------|------------|------------|------------|
| cg26874634 | 0.01313629 | 15.3384548 | 1.77283708 | 132.707173 | cg12996903 | 0.02378569 | 6.40624185 | 1.28015189 | 32.0586447 |
| cg08463485 | 0.01313668 | 28.1243085 | 2.01316922 | 392.901262 | cg26866325 | 0.02378714 | 6.81187651 | 1.29062388 | 35.9528925 |
| cg26763524 | 0.01313699 | 682.532558 | 3.92937378 | 118555.963 | cg27427051 | 0.02379138 | 98762.2956 | 4.61318916 | 2114370491 |
| cg07221526 | 0.0131452  | 60.3968438 | 2.36242022 | 1544.08547 | cg04828587 | 0.02379359 | 209.037091 | 2.03436179 | 21479.2204 |
| cg27405799 | 0.01314553 | 11702.8512 | 7.12576227 | 19219940.5 | cg06911354 | 0.02380777 | 5.08973867 | 1.24130729 | 20.8694816 |
| cg22455694 | 0.01315036 | 15.9014969 | 1.78568943 | 141.602229 | cg15597540 | 0.02380888 | 341692.24  | 5.43331509 | 2.1488E+10 |
| cg07859876 | 0.01315284 | 327842.632 | 14.3183972 | 7506482037 | cg00904122 | 0.0238124  | 489147.601 | 5.6968849  | 4.1999E+10 |
| cg11396509 | 0.01316392 | 215.331151 | 3.08117089 | 15048.6638 | cg00609948 | 0.02381497 | 117.469082 | 1.88313718 | 7327.65802 |
| cg15585294 | 0.01317251 | 19.5205127 | 1.86304521 | 204.530956 | cg08187418 | 0.02382391 | 167.641835 | 1.97365324 | 14239.4745 |
| cg08717423 | 0.01317468 | 2.17E-05   | 4.46E-09   | 0.1055631  | cg07059148 | 0.02383819 | 7815106.81 | 8.21068756 | 7.4386E+12 |
| cg12794469 | 0.01317485 | 384.799126 | 3.47764218 | 42577.8041 | cg20780850 | 0.02384138 | 93.2952925 | 1.82503857 | 4769.22063 |
| cg16357921 | 0.01318313 | 0.01812991 | 0.00076088 | 0.4319913  | cg06957820 | 0.0238416  | 40.8016294 | 1.63542188 | 1017.9471  |
| cg26229990 | 0.01318327 | 18.1548579 | 1.83447071 | 179.669735 | cg09313482 | 0.02385358 | 8.68985993 | 1.33191046 | 56.6957523 |
| cg10428938 | 0.01318747 | 4.26833811 | 1.35485286 | 13.4470028 | cg25001691 | 0.02386004 | 40358.9194 | 4.07734114 | 399486410  |
| cg24844211 | 0.01318754 | 9.798247   | 1.61218052 | 59.5501824 | cg24987648 | 0.0238685  | 582.942582 | 2.32463626 | 146182.893 |
| cg10056728 | 0.01319222 | 26.6674096 | 1.98770448 | 357.77488  | cg21357361 | 0.02389049 | 1208.39119 | 2.55783922 | 570876.099 |
| cg00242147 | 0.0131927  | 40.5408702 | 2.16973089 | 757.495854 | cg24398023 | 0.02389293 | 5036.87332 | 3.08927641 | 8212309.13 |
| cg02239891 | 0.0131971  | 123572872  | 49.2830201 | 3.0985E+14 | cg01554410 | 0.02391983 | 12.2746378 | 1.39287767 | 108.169394 |
| cg14067419 | 0.01320695 | 18.1774987 | 1.83386289 | 180.177842 | cg22287064 | 0.02392771 | 3.39212459 | 1.17510404 | 9.79190678 |
| cg18682936 | 0.01321215 | 10523380.4 | 29.3770302 | 3.7697E+12 | cg11908659 | 0.02393456 | 4034.51885 | 2.99350084 | 5437560.63 |
| cg12752647 | 0.01321458 | 9.61190181 | 1.60486825 | 57.5677511 | cg27094166 | 0.02395297 | 92736.5075 | 4.52281909 | 1901482165 |
| cg13670911 | 0.01321558 | 2861.00967 | 5.2783274  | 1550751.92 | cg11675148 | 0.02398324 | 3.7478E+13 | 61.4433309 | 2.29E+25   |
| cg26969942 | 0.01323987 | 506450249  | 65.7109541 | 3.9033E+15 | cg21167563 | 0.02398725 | 98.8155893 | 1.83142012 | 5331.66617 |
| cg08405378 | 0.01324422 | 35945.2191 | 8.9354289  | 144599525  | cg02590886 | 0.02400002 | 165.727539 | 1.95973348 | 14014.9757 |
| cg02186769 | 0.01324424 | 575.492354 | 3.76906575 | 87870.9661 | cg02024449 | 0.02401296 | 3.6668E+12 | 44.9950878 | 2.99E+23   |
| cg25446604 | 0.01324523 | 0.13863059 | 0.02903162 | 0.66198312 | cg23250439 | 0.0240172  | 32143.9276 | 3.91661209 | 263807612  |
| cg06151074 | 0.01324886 | 10.3649153 | 1.62924653 | 65.9393573 | cg02893231 | 0.02401732 | 9.11714727 | 1.33742389 | 62.1511061 |
| cg07105272 | 0.013251   | 8.80471616 | 1.57463608 | 49.2323451 | cg20689586 | 0.02402084 | 29418.4501 | 3.87033442 | 223609930  |
| cg21480605 | 0.01325204 | 27.3438097 | 1.99474433 | 374.826949 | cg19540689 | 0.02402285 | 5.47460384 | 1.25056106 | 23.9662727 |
| cg11235152 | 0.01326379 | 5.28882955 | 1.41546598 | 19.7614908 | cg04988673 | 0.02403074 | 2.3683E+12 | 42.3476825 | 1.32E+23   |

|            |            |            |            |            |            |            |            |            |            |
|------------|------------|------------|------------|------------|------------|------------|------------|------------|------------|
| cg02366931 | 0.01327533 | 7.04517653 | 1.50242884 | 33.0361819 | cg24981593 | 0.02403479 | 6.48513886 | 1.27855788 | 32.8941118 |
| cg04608326 | 0.0132767  | 2258.70617 | 5.00349632 | 1019637.72 | cg15980914 | 0.02407419 | 0.01158709 | 0.00024097 | 0.55717788 |
| cg17956609 | 0.01327828 | 18.8714697 | 1.84495547 | 193.030333 | cg14103123 | 0.02407514 | 13.9225107 | 1.41269633 | 137.210171 |
| cg01802294 | 0.01328746 | 8.67046692 | 1.56853224 | 47.9282444 | cg14676702 | 0.02409011 | 32.6206791 | 1.57914427 | 673.851482 |
| cg16511225 | 0.01328994 | 0.0830171  | 0.01157614 | 0.59534863 | cg08941457 | 0.02409165 | 9.57974874 | 1.34477029 | 68.2433173 |
| cg05372434 | 0.01330149 | 175.999938 | 2.93566926 | 10551.5899 | cg02986643 | 0.02409187 | 13.3868657 | 1.40506873 | 127.544062 |
| cg26220061 | 0.0133048  | 6267980114 | 109.728364 | 3.5804E+17 | cg05863534 | 0.02409275 | 16081.9389 | 3.55951392 | 72658448.3 |
| cg16540391 | 0.01331938 | 438.408919 | 3.54698078 | 54187.6012 | cg03011535 | 0.02410613 | 4.71323462 | 1.22520033 | 18.1313863 |
| cg00742040 | 0.0133411  | 8.80239725 | 1.57190199 | 49.292003  | cg22472290 | 0.02413788 | 9.49288055 | 1.34230706 | 67.1342524 |
| cg23425316 | 0.01334225 | 4.26558067 | 1.35205665 | 13.4574084 | cg06424168 | 0.02414621 | 12.2044893 | 1.38698045 | 107.391246 |
| cg04091405 | 0.013343   | 1.98E-06   | 5.99E-11   | 0.06514809 | cg26807935 | 0.02414645 | 92051.5142 | 4.45734114 | 1901016996 |
| cg15457058 | 0.01335026 | 4.14515031 | 1.34389776 | 12.7854005 | cg23368715 | 0.0241489  | 33.9194506 | 1.58522924 | 725.780915 |
| cg03895540 | 0.01336371 | 0.13893419 | 0.02908716 | 0.66361626 | cg25699052 | 0.02415987 | 9.55E-05   | 3.06E-08   | 0.2983461  |
| cg26175971 | 0.01336872 | 18.3212982 | 1.82947828 | 183.47852  | cg07612928 | 0.0241826  | 15.9564198 | 1.43556858 | 177.35644  |
| cg26389053 | 0.01337174 | 59.1290572 | 2.3333137  | 1498.4035  | cg19115492 | 0.02418339 | 28.2548111 | 1.54671338 | 516.148862 |
| cg02993937 | 0.01337568 | 60267742.3 | 41.2600355 | 8.8032E+13 | cg18070812 | 0.02419285 | 0.06488153 | 0.00601487 | 0.69986799 |
| cg17649836 | 0.01338654 | 132898.172 | 11.5722975 | 1526224523 | cg26529833 | 0.02421339 | 10.8027509 | 1.36369174 | 85.5761047 |
| cg13567636 | 0.01338761 | 70082001.8 | 42.494644  | 1.1558E+14 | cg12792157 | 0.02421689 | 99.0516714 | 1.82015385 | 5390.33205 |
| cg19044256 | 0.01339321 | 11.3838282 | 1.65645342 | 78.2343431 | cg09427374 | 0.02422148 | 24087.8725 | 3.72330853 | 155836024  |
| cg13478617 | 0.01339981 | 1939.3408  | 4.80840256 | 782181.339 | cg22658758 | 0.02422756 | 13.9914341 | 1.41012647 | 138.82459  |
| cg16197272 | 0.01340297 | 24795739.1 | 34.1752495 | 1.799E+13  | cg02149965 | 0.02423195 | 21.6571806 | 1.49257917 | 314.243615 |
| cg26832893 | 0.01340854 | 1708.69682 | 4.68114847 | 623702.677 | cg10449522 | 0.02423356 | 1076368.25 | 6.10226872 | 1.8986E+11 |
| cg00473633 | 0.01340957 | 7.55853743 | 1.52108155 | 37.5597799 | cg24838316 | 0.02425195 | 5.16953686 | 1.23830154 | 21.5812632 |
| cg13298859 | 0.01341585 | 6.39690015 | 1.46920469 | 27.852029  | cg10165801 | 0.02426521 | 7.12626128 | 1.29090898 | 39.3394115 |
| cg00031256 | 0.0134169  | 1860334.51 | 19.9373464 | 1.7359E+11 | cg06501716 | 0.024266   | 50.1016907 | 1.66348812 | 1508.98547 |
| cg00810836 | 0.01342031 | 960.137708 | 4.15089471 | 222088.124 | cg05335944 | 0.02427254 | 10.052598  | 1.34982968 | 74.8647984 |
| cg07498606 | 0.01342056 | 1701.37816 | 4.67341467 | 619394.563 | cg02320501 | 0.02428496 | 13.5024822 | 1.40232402 | 130.010627 |
| cg06530441 | 0.01342609 | 5.88449878 | 1.44377006 | 23.9839617 | cg13811955 | 0.02429274 | 15.6804602 | 1.42964535 | 171.984492 |
| cg21732915 | 0.0134302  | 700.938082 | 3.88667029 | 126410.052 | cg24893721 | 0.02430796 | 332.165038 | 2.1241548  | 51942.3597 |
| cg03086857 | 0.01343266 | 11.6089662 | 1.66182446 | 81.0964687 | cg08545129 | 0.02430921 | 8.55461377 | 1.32117646 | 55.3910996 |

|            |            |            |            |            |             |            |            |            |            |
|------------|------------|------------|------------|------------|-------------|------------|------------|------------|------------|
| cg11399508 | 0.01343754 | 8.26268102 | 1.54865539 | 44.0846286 | cg27536453  | 0.02430928 | 8.04264017 | 1.31063778 | 49.3531178 |
| cg23483563 | 0.01343827 | 7.73930153 | 1.52778777 | 39.204914  | cg13520520  | 0.02432537 | 20.7289166 | 1.4815175  | 290.032339 |
| cg05118482 | 0.01343961 | 3072.05807 | 5.27542367 | 1788963.57 | cg24041453  | 0.02433703 | 32.2503538 | 1.56851386 | 663.102413 |
| cg23735712 | 0.01345608 | 7.30541042 | 1.50918396 | 35.3628336 | ch.7.103954 | 0.02433858 | 2.1144E+10 | 21.773366  | 2.0533E+19 |
| cg13252294 | 0.01346257 | 1.8943E+11 | 215.468672 | 1.67E+20   | cg04848570  | 0.02434573 | 0.07852205 | 0.00857276 | 0.71922142 |
| cg05393563 | 0.01346305 | 869717.888 | 16.9385509 | 4.4656E+10 | cg24718465  | 0.02434842 | 20.028639  | 1.47430764 | 272.091367 |
| cg12148919 | 0.01346735 | 2.43E-06   | 8.58E-11   | 0.06896808 | cg14019833  | 0.02435283 | 5205627.65 | 7.40845512 | 3.6578E+12 |
| cg01446477 | 0.01347614 | 121431920  | 46.9648116 | 3.1397E+14 | cg00402417  | 0.02435777 | 23.3517371 | 1.50364284 | 362.655022 |
| cg02033116 | 0.01347726 | 133119.066 | 11.4709964 | 1544825319 | cg11260715  | 0.02435879 | 93.2931495 | 1.79890194 | 4838.29137 |
| cg26169020 | 0.01347824 | 106374204  | 45.6813617 | 2.477E+14  | cg21844669  | 0.02435899 | 0.17022444 | 0.03644107 | 0.79515661 |
| cg03513643 | 0.0134826  | 4276.3681  | 5.63217517 | 3246938.1  | cg04876465  | 0.02435941 | 2.6553E+11 | 30.1208881 | 2.34E+21   |
| cg07757611 | 0.01349069 | 7.63683165 | 1.52219277 | 38.3139368 | cg10396171  | 0.02436028 | 5.46529604 | 1.24589453 | 23.9743093 |
| cg17279839 | 0.01349274 | 8.69024271 | 1.56333189 | 48.3072845 | cg01348757  | 0.02436356 | 50.7521053 | 1.66238005 | 1549.45085 |
| cg11778840 | 0.01349658 | 10.1581441 | 1.61445349 | 63.9150597 | cg19706516  | 0.0243692  | 7.80235684 | 1.30450744 | 46.6664813 |
| cg16323609 | 0.01349956 | 46.0141919 | 2.20566987 | 959.937784 | cg24127861  | 0.02437423 | 6.73283226 | 1.27978334 | 35.420863  |
| cg05670898 | 0.01350035 | 15.7559594 | 1.76756228 | 140.447813 | cg01910481  | 0.02437602 | 0.10325049 | 0.01430004 | 0.74549883 |
| cg25349900 | 0.01350244 | 35.4232433 | 2.089455   | 600.542324 | cg07535628  | 0.02438239 | 25.3589552 | 1.51904182 | 423.343585 |
| cg10500737 | 0.01350976 | 12.899557  | 1.69566368 | 98.1318252 | cg23591609  | 0.02438385 | 16.5197596 | 1.43711179 | 189.89647  |
| cg03281983 | 0.01351264 | 327.034793 | 3.30533748 | 32357.2877 | cg25424488  | 0.02440045 | 260047.211 | 5.00759328 | 1.3504E+10 |
| cg00105606 | 0.01351626 | 1.2359E+10 | 121.197224 | 1.2603E+18 | cg21788755  | 0.02440931 | 21.6531345 | 1.48757246 | 315.183461 |
| cg13398482 | 0.01351999 | 4.05569833 | 1.33510668 | 12.3201308 | cg12905273  | 0.02441703 | 7117.78989 | 3.14294049 | 16119596.6 |
| cg00700324 | 0.01352075 | 6036.57433 | 6.03115623 | 6041997.29 | cg05135288  | 0.02441897 | 22.3701285 | 1.49357052 | 335.051236 |
| cg02797930 | 0.01352612 | 891.743069 | 4.06284522 | 195726.309 | cg00951770  | 0.02442855 | 22.2954652 | 1.49265505 | 333.022534 |
| cg20023120 | 0.01352964 | 7.85175194 | 1.52990417 | 40.2966472 | cg20643029  | 0.02442858 | 11.1077803 | 1.36432046 | 90.4353388 |
| cg12031217 | 0.01353179 | 92.878616  | 2.54692848 | 3386.99629 | cg07859876  | 0.02443791 | 131572.499 | 4.57330471 | 3785298317 |
| cg12179011 | 0.01353227 | 7.34281435 | 1.50882775 | 35.7343127 | cg25048751  | 0.02445306 | 11.4013665 | 1.36842303 | 94.9934013 |
| cg27611263 | 0.01353965 | 11.0555413 | 1.64149591 | 74.4595171 | cg03613618  | 0.0244686  | 12.8721438 | 1.38965324 | 119.232683 |
| cg13776095 | 0.01354287 | 6.8871766  | 1.48875837 | 31.8609135 | cg05873146  | 0.02447143 | 14.6007425 | 1.41232289 | 150.94401  |
| cg24226687 | 0.01354532 | 1.5327E+16 | 2175.17669 | 1.08E+29   | cg07701282  | 0.02447257 | 421.469359 | 2.17754494 | 81576.4659 |
| cg09767313 | 0.01354691 | 0.02366316 | 0.0012117  | 0.46211551 | cg02927346  | 0.02448047 | 11.3684523 | 1.36735782 | 94.5193023 |



|            |            |            |            |            |            |            |            |            |            |
|------------|------------|------------|------------|------------|------------|------------|------------|------------|------------|
| cg10140906 | 0.01354963 | 16.2874246 | 1.77763886 | 149.231775 | cg23994468 | 0.02448075 | 69.3919897 | 1.7258251  | 2790.11368 |
| cg05898524 | 0.01355073 | 19.6280568 | 1.8472941  | 208.554021 | cg18509435 | 0.02448365 | 0.17840294 | 0.03973229 | 0.8010515  |
| cg14935646 | 0.01355635 | 10.1238392 | 1.61142923 | 63.6032405 | cg01280841 | 0.02449763 | 5.14069218 | 1.23436377 | 21.40918   |
| cg25660583 | 0.01355661 | 742169.223 | 16.2163808 | 3.3967E+10 | cg10674754 | 0.02451614 | 23363744.6 | 8.84755961 | 6.1697E+13 |
| cg20917083 | 0.01355778 | 9.29520622 | 1.58327266 | 54.5710545 | cg03379706 | 0.02453395 | 28.30047   | 1.5360003  | 521.429978 |
| cg19884658 | 0.01356197 | 5.57314347 | 1.42476358 | 21.8000577 | cg12914014 | 0.02453985 | 25.5240849 | 1.51559609 | 429.849954 |
| cg04710571 | 0.01356351 | 37.1354057 | 2.10597345 | 654.822288 | cg00658979 | 0.02454347 | 18.1411402 | 1.45051809 | 226.885119 |
| cg23448101 | 0.01356508 | 4.351E+10  | 155.57054  | 1.2169E+19 | cg07973470 | 0.02456536 | 20.8149946 | 1.47574142 | 293.59073  |
| cg17908846 | 0.01357273 | 3644316.8  | 22.464654  | 5.912E+11  | cg24494316 | 0.02457391 | 1202.76931 | 2.48145413 | 582986.404 |
| cg12742785 | 0.01357539 | 33577.3349 | 8.55323139 | 131814208  | cg26103512 | 0.02457949 | 4725.02218 | 2.95615562 | 7552320.46 |
| cg07952391 | 0.01358222 | 11.2407898 | 1.64569233 | 76.7794514 | cg13995374 | 0.02458438 | 12238.7628 | 3.3385491  | 44865991   |
| cg20402382 | 0.01358438 | 520.192013 | 3.62394292 | 74669.9759 | cg24000528 | 0.02458695 | 22.4068386 | 1.48914083 | 337.151734 |
| cg25612145 | 0.01358523 | 0.03010715 | 0.00186435 | 0.48619676 | cg09524686 | 0.02458699 | 12.9486367 | 1.38814914 | 120.784711 |
| cg02392688 | 0.01359299 | 3.4504E+11 | 236.852548 | 5.03E+20   | cg04984052 | 0.02459384 | 6282.64638 | 3.06371231 | 12883600.5 |
| cg04579966 | 0.013593   | 3.08685923 | 1.26107787 | 7.5559964  | cg25925006 | 0.02459886 | 5.48372548 | 1.24335691 | 24.1855294 |
| cg24107163 | 0.01359783 | 9.26116919 | 1.58088017 | 54.2541153 | cg15239874 | 0.02460302 | 240607117  | 11.817591  | 4.8988E+15 |
| cg19025234 | 0.01359913 | 9.24462701 | 1.58026006 | 54.0816863 | cg14511745 | 0.02460583 | 12041588.3 | 8.05325307 | 1.8005E+13 |
| cg00644823 | 0.01359975 | 8.59606745 | 1.55676933 | 47.465205  | cg26427777 | 0.02461057 | 1871.00314 | 2.62160119 | 1335310.94 |
| cg18486150 | 0.0136058  | 12.407557  | 1.67865175 | 91.7089979 | cg04320760 | 0.02462793 | 270.029446 | 2.04536937 | 35649.2587 |
| cg19385386 | 0.01362547 | 244849715  | 52.9806958 | 1.1316E+15 | cg01577760 | 0.02463687 | 7.14915305 | 1.28570246 | 39.7528905 |
| cg07906351 | 0.01362556 | 192.564365 | 2.94803527 | 12578.2195 | cg19091677 | 0.02464033 | 756235089  | 13.6194719 | 4.1991E+16 |
| cg20586124 | 0.01363303 | 321.358235 | 3.27404959 | 31542.3185 | cg03753597 | 0.02465147 | 116859.444 | 4.43609365 | 3078413307 |
| cg09192572 | 0.01363758 | 20.4256689 | 1.85839488 | 224.499085 | cg01298991 | 0.0246732  | 16.811001  | 1.43321979 | 197.185217 |
| cg24333469 | 0.01365254 | 7.13785248 | 1.4970383  | 34.033156  | cg17255450 | 0.02467827 | 6.17387266 | 1.26125754 | 30.2211899 |
| cg21430539 | 0.0136795  | 8.15645259 | 1.53786714 | 43.259731  | cg22338443 | 0.02468476 | 15.0326617 | 1.41265819 | 159.968576 |
| cg03804903 | 0.01368314 | 18126.9639 | 7.46639417 | 44008769.5 | cg21464220 | 0.0246913  | 21.9571434 | 1.48237405 | 325.232451 |
| cg22680075 | 0.01369051 | 0.00326585 | 3.45E-05   | 0.30933834 | cg24754334 | 0.02469253 | 1867512.92 | 6.29657144 | 5.5389E+11 |
| cg13053408 | 0.01370166 | 45.9852639 | 2.19097379 | 965.161929 | cg04915044 | 0.0247007  | 3.65599902 | 1.17953845 | 11.3318297 |
| cg24361162 | 0.01370396 | 5.00082883 | 1.39061238 | 17.9836519 | cg14037250 | 0.02470838 | 964.057809 | 2.39859498 | 387479.948 |
| cg23325963 | 0.01370449 | 4.69046241 | 1.37246924 | 16.0298221 | cg06425443 | 0.02471501 | 2283.77645 | 2.67616066 | 1948924.42 |

|            |            |            |            |            |            |            |            |            |            |
|------------|------------|------------|------------|------------|------------|------------|------------|------------|------------|
| cg00658979 | 0.01370458 | 15.0243951 | 1.74210018 | 129.574895 | cg16860686 | 0.02472607 | 17.8102518 | 1.44248024 | 219.902541 |
| cg13821072 | 0.01370704 | 284.739331 | 3.18240642 | 25476.4715 | cg18796438 | 0.02473021 | 0.01169622 | 0.00024089 | 0.56789202 |
| cg02977954 | 0.013714   | 0.00148857 | 8.40E-06   | 0.26366421 | cg08196359 | 0.02473458 | 6.51E-07   | 2.59E-12   | 0.16340938 |
| cg00073716 | 0.01372345 | 39914.4017 | 8.74648923 | 182148451  | cg10196720 | 0.02475191 | 4.76649536 | 1.21947837 | 18.6304886 |
| cg25631022 | 0.01372929 | 40.2560248 | 2.13021725 | 760.742845 | cg23044884 | 0.02476659 | 5.38861608 | 1.23845064 | 23.4463791 |
| cg19264170 | 0.01374498 | 8.49021567 | 1.54873715 | 46.5435739 | cg13702222 | 0.02476755 | 5.97755737 | 1.25485619 | 28.4743324 |
| cg00901161 | 0.0137541  | 11.5109283 | 1.64790199 | 80.4061596 | cg20666917 | 0.02479761 | 26.7555041 | 1.51696818 | 471.899813 |
| cg18655657 | 0.01376995 | 730.103852 | 3.84594495 | 138600.953 | cg17460200 | 0.02480593 | 3059237508 | 15.9282581 | 5.8757E+17 |
| cg11141711 | 0.01377208 | 1.7433E+13 | 507.035668 | 5.99E+23   | cg09565397 | 0.02482222 | 11.1899166 | 1.35775274 | 92.2216767 |
| cg27582235 | 0.01377921 | 14.9818511 | 1.7381292  | 129.136466 | cg14042879 | 0.0248272  | 659.223995 | 2.27462595 | 191053.951 |
| cg05204123 | 0.01378107 | 25.714572  | 1.94077189 | 340.709393 | cg01081091 | 0.02483452 | 2900.113   | 2.74292182 | 3066312.48 |
| cg16416806 | 0.01378406 | 36669.5482 | 8.550031   | 157269110  | cg02446170 | 0.02483537 | 679270.152 | 5.47130121 | 8.4332E+10 |
| cg25110734 | 0.01379435 | 8.4735938  | 1.54674334 | 46.421271  | cg01899600 | 0.02484976 | 0.13848963 | 0.02462749 | 0.77877923 |
| cg21093033 | 0.01380678 | 7.60133015 | 1.51250647 | 38.201635  | cg01164291 | 0.02485659 | 6349.76818 | 3.02538562 | 13327079.9 |
| cg02436004 | 0.01381561 | 7.15492594 | 1.49372969 | 34.2719071 | cg14838256 | 0.02486081 | 311657450  | 11.8477135 | 8.1982E+15 |
| cg22977667 | 0.0138169  | 1936010626 | 78.2880607 | 4.7876E+16 | cg21997510 | 0.0248704  | 0.13359731 | 0.02301693 | 0.7754397  |
| cg02228815 | 0.01381885 | 9.02066252 | 1.56591184 | 51.964836  | cg11828766 | 0.02487364 | 31017.1555 | 3.69324382 | 260492938  |
| cg12434681 | 0.01382    | 7.14611001 | 1.49324594 | 34.1985785 | cg15128200 | 0.02490782 | 9.59853836 | 1.33007331 | 69.2683165 |
| cg16062483 | 0.01382023 | 16.3379658 | 1.76746003 | 151.024137 | cg16763443 | 0.0249286  | 11.2134391 | 1.35600467 | 92.7291916 |
| cg14960373 | 0.01382417 | 9.88325233 | 1.59517977 | 61.233648  | cg25505476 | 0.02492964 | 1.3159E+10 | 18.8322832 | 9.1951E+18 |
| cg03059073 | 0.01383802 | 0.13494304 | 0.02738534 | 0.66494069 | cg01555036 | 0.02493709 | 20945371.7 | 8.35681479 | 5.2497E+13 |
| cg19516235 | 0.01384183 | 230.033542 | 3.02760716 | 17477.6408 | cg10386659 | 0.02497054 | 3595.70521 | 2.79968335 | 4618056.53 |
| cg25826457 | 0.01384368 | 3065.33495 | 5.13033206 | 1831514.65 | cg09495769 | 0.02497422 | 8.02452321 | 1.29928014 | 49.5604996 |
| cg13932603 | 0.0138569  | 3195.57584 | 5.16937453 | 1975423.7  | cg26149678 | 0.02497849 | 14.5920702 | 1.40062472 | 152.023958 |
| cg14182841 | 0.01385736 | 171.953405 | 2.85144249 | 10369.4792 | cg02797930 | 0.02499238 | 11174.6245 | 3.22475594 | 38723002.5 |
| cg17355241 | 0.01385888 | 1847.57123 | 4.6232084  | 738344.272 | cg18746774 | 0.0249924  | 0.02634733 | 0.00109608 | 0.63332929 |
| cg00403315 | 0.01386648 | 1644.23011 | 4.51264032 | 599093.312 | cg08008403 | 0.02500478 | 11.6653692 | 1.3612345  | 99.9686966 |
| cg26340700 | 0.01387013 | 103.645861 | 2.5709421  | 4178.41559 | cg09526712 | 0.02500504 | 12.2379507 | 1.36944204 | 109.363839 |
| cg27278382 | 0.01387835 | 3.6276E+15 | 1461.34034 | 9.01E+27   | cg13598790 | 0.02500951 | 139973.653 | 4.42447353 | 4428238370 |
| cg13794888 | 0.01388372 | 16961.1201 | 7.24537022 | 39705299.4 | cg20651988 | 0.02501478 | 415.96503  | 2.13120444 | 81187.3808 |

|            |            |            |            |            |            |            |            |            |            |
|------------|------------|------------|------------|------------|------------|------------|------------|------------|------------|
| cg05281603 | 0.0138981  | 14.6442948 | 1.72543533 | 124.290587 | cg01770333 | 0.02501642 | 679.037929 | 2.26622383 | 203462.916 |
| cg17850838 | 0.01390131 | 4560.72073 | 5.54021469 | 3754398.47 | cg11056224 | 0.02501781 | 94.4762995 | 1.7693622  | 5044.62634 |
| cg08021945 | 0.01390203 | 12.3782361 | 1.66734302 | 91.8951446 | cg26174326 | 0.02503183 | 14.1618096 | 1.39417694 | 143.853227 |
| cg15533222 | 0.01390372 | 96838.7308 | 10.3057558 | 909951676  | cg04821708 | 0.02503191 | 9.71698556 | 1.32986689 | 70.9994429 |
| cg07313709 | 0.01390476 | 864.987893 | 3.95116017 | 189363.129 | cg03284670 | 0.02504349 | 0.13765067 | 0.02429233 | 0.77998726 |
| cg16749785 | 0.01390609 | 0.04728267 | 0.00415581 | 0.537958   | cg17963935 | 0.02504627 | 53670542.8 | 9.29862565 | 3.0978E+14 |
| cg24716879 | 0.013907   | 3.51548335 | 1.29098101 | 9.573048   | cg05421550 | 0.02505187 | 955.40746  | 2.36195748 | 386460.561 |
| cg18881778 | 0.01390761 | 5.26756147 | 1.40150694 | 19.7981208 | cg08223837 | 0.02506134 | 78.5613738 | 1.72690751 | 3573.95485 |
| cg16900618 | 0.01391986 | 0.01456267 | 0.00050053 | 0.42369155 | cg00541350 | 0.0250686  | 238324.118 | 4.70928253 | 1.2061E+10 |
| cg01723761 | 0.01391997 | 5.22732499 | 1.3990864  | 19.5305497 | cg02918577 | 0.02507119 | 6.32918117 | 1.25972715 | 31.7993736 |
| cg03093398 | 0.01392431 | 1.3365E+12 | 289.533986 | 6.17E+21   | cg14563485 | 0.02507633 | 0.02015317 | 0.00066194 | 0.61357371 |
| cg04327181 | 0.01392672 | 39.6043424 | 2.11021556 | 743.290859 | cg12595281 | 0.02508354 | 6.81829085 | 1.27133459 | 36.5671557 |
| cg03001484 | 0.01392825 | 38.2819596 | 2.09562095 | 699.319419 | cg17184255 | 0.02508372 | 10.7216766 | 1.34537715 | 85.4439574 |
| cg17856005 | 0.01394159 | 137.487563 | 2.71507531 | 6962.17523 | cg02631838 | 0.02508669 | 25.3352389 | 1.49804185 | 428.475564 |
| cg10802132 | 0.0139418  | 6.40749795 | 1.45763431 | 28.1662072 | cg06352088 | 0.02508785 | 109.65948  | 1.79918701 | 6683.68634 |
| cg03017520 | 0.01394364 | 3.23579784 | 1.26896428 | 8.25112873 | cg16209444 | 0.02511498 | 13.4674774 | 1.38361589 | 131.086199 |
| cg09503045 | 0.01394865 | 5.96554792 | 1.43650681 | 24.7738206 | cg10933774 | 0.02511522 | 26.8789745 | 1.50831001 | 478.99919  |
| cg15648896 | 0.01394964 | 7.90885566 | 1.52102656 | 41.1235408 | cg01791407 | 0.02511967 | 3.60405955 | 1.17357723 | 11.0680788 |
| cg22063269 | 0.01395725 | 1161455.31 | 16.9665111 | 7.9508E+10 | cg26979537 | 0.02515945 | 8.68453567 | 1.30909646 | 57.6131418 |
| cg07232945 | 0.01396101 | 17.3348718 | 1.78293155 | 168.5414   | cg08141873 | 0.02516248 | 28.8944651 | 1.52053644 | 549.076033 |
| cg13495235 | 0.01396512 | 8064.01897 | 6.19072132 | 10504172.1 | cg04626931 | 0.02516451 | 14.1744902 | 1.39138545 | 144.400082 |
| cg08124910 | 0.01397587 | 7.94775003 | 1.52184995 | 41.5065431 | cg14547335 | 0.02516722 | 0.10576674 | 0.01479867 | 0.75591937 |
| cg25431026 | 0.01397815 | 1811765.92 | 18.5203878 | 1.7724E+11 | cg10583651 | 0.02518248 | 11.5552472 | 1.35606201 | 98.4643301 |
| cg12687767 | 0.01398055 | 13.6552129 | 1.69802829 | 109.812563 | cg04042828 | 0.02519902 | 16.4319853 | 1.41641656 | 190.629048 |
| cg11802732 | 0.01398712 | 23473403.9 | 31.077304  | 1.773E+13  | cg07352001 | 0.02520354 | 1.3532E+15 | 76.106683  | 2.41E+28   |
| cg20955894 | 0.01398924 | 8.67720079 | 1.54879086 | 48.6145775 | cg02367316 | 0.02521016 | 5.47703873 | 1.23538094 | 24.2823506 |
| cg12739419 | 0.01399178 | 18.8781199 | 1.81265454 | 196.608566 | cg12358524 | 0.02522807 | 6.2017519  | 1.25436512 | 30.6623055 |
| cg04748923 | 0.01399486 | 575.687055 | 3.6201193  | 91548.2496 | cg19596493 | 0.02523502 | 1998.93014 | 2.56918359 | 1555249.58 |
| cg05889842 | 0.01399503 | 183097.858 | 11.6218807 | 2884629987 | cg24203851 | 0.02524313 | 696.496001 | 2.25325869 | 215291.161 |
| cg15769920 | 0.01399956 | 33238.5074 | 8.22438638 | 134332013  | cg02132636 | 0.02524451 | 25901.7273 | 3.5291093  | 190104478  |

|            |            |            |            |            |            |            |            |            |            |
|------------|------------|------------|------------|------------|------------|------------|------------|------------|------------|
| cg02287056 | 0.01399992 | 389130211  | 54.760028  | 2.7652E+15 | cg27547291 | 0.02524738 | 13.4888531 | 1.38102981 | 131.7489   |
| cg26971042 | 0.01400072 | 36.2024953 | 2.06750794 | 633.913246 | cg00863378 | 0.02525763 | 16.8555086 | 1.41949569 | 200.147257 |
| cg23046727 | 0.01400653 | 10.4570962 | 1.60787526 | 68.0095431 | cg10397527 | 0.02525831 | 5.09983272 | 1.22389589 | 21.2504135 |
| cg16007541 | 0.01401031 | 60.6569028 | 2.29437854 | 1603.59757 | cg25204272 | 0.02526882 | 4141.0253  | 2.80758022 | 6107782.95 |
| cg15578015 | 0.01401864 | 3152.75626 | 5.09940856 | 1949220.57 | cg23520574 | 0.02527988 | 0.16116362 | 0.03256409 | 0.79761841 |
| cg06952862 | 0.0140196  | 141401493  | 44.4788888 | 4.4953E+14 | cg12421755 | 0.02528104 | 4.42411793 | 1.20226827 | 16.2799102 |
| cg22024145 | 0.0140213  | 34680951.2 | 33.4673877 | 3.5939E+13 | cg26300461 | 0.02528181 | 8.2280408  | 1.29830752 | 52.1453158 |
| cg12091786 | 0.01402192 | 7.65284549 | 1.50905919 | 38.8096402 | cg10902825 | 0.02528551 | 6.68518914 | 1.26528509 | 35.3214893 |
| cg03041742 | 0.01402508 | 4.8183E+10 | 144.466278 | 1.607E+19  | cg01012089 | 0.02529993 | 140.004348 | 1.84335574 | 10633.4426 |
| cg03740162 | 0.01402856 | 9.05898733 | 1.56122548 | 52.5646376 | cg26715571 | 0.02530033 | 8.12950919 | 1.29607006 | 50.9917802 |
| cg18807466 | 0.01403381 | 28.6899198 | 1.97062549 | 417.690477 | cg10363578 | 0.02530742 | 1.7139E+10 | 18.4548737 | 1.5917E+19 |
| cg04622777 | 0.01403657 | 11.4141149 | 1.63562108 | 79.6529346 | cg17581200 | 0.02532339 | 8075.61289 | 3.04094005 | 21445843.2 |
| cg13105327 | 0.0140482  | 12.3942153 | 1.66267198 | 92.391388  | cg20241658 | 0.02535215 | 1259593.21 | 5.66323329 | 2.8015E+11 |
| cg27494100 | 0.01404887 | 0.00373448 | 4.31E-05   | 0.32333798 | cg26835312 | 0.02535488 | 16.5191501 | 1.41364037 | 193.035177 |
| cg23114616 | 0.01405133 | 7.28594639 | 1.49341682 | 35.5460138 | cg24436578 | 0.02536907 | 194.446949 | 1.9156556  | 19737.1677 |
| cg08513472 | 0.01405214 | 4.27157046 | 1.3407394  | 13.609143  | cg08278892 | 0.02537651 | 7.58788394 | 1.28387081 | 44.8456201 |
| cg08188069 | 0.01407036 | 6.32092035 | 1.45075083 | 27.5402455 | cg23526147 | 0.02537969 | 18.3149818 | 1.43114462 | 234.38481  |
| cg00526088 | 0.01407325 | 3311390.7  | 20.679679  | 5.3025E+11 | cg25923056 | 0.02538521 | 13.5778561 | 1.37918432 | 133.671891 |
| cg17838765 | 0.01408228 | 10.5250095 | 1.60759797 | 68.9076671 | cg17385737 | 0.02539519 | 276532.152 | 4.68138589 | 1.6335E+10 |
| cg26915924 | 0.01408891 | 0.09051707 | 0.01329922 | 0.61607678 | cg06898463 | 0.02539743 | 428.395004 | 2.10952456 | 86996.9864 |
| cg19999035 | 0.01409356 | 8.79764355 | 1.5501933  | 49.9283103 | cg05104080 | 0.02540831 | 51.4375039 | 1.62435204 | 1628.84445 |
| cg26861214 | 0.01409438 | 0.01095458 | 0.00029813 | 0.40252469 | cg02357321 | 0.02541469 | 17.756389  | 1.42483216 | 221.281747 |
| cg16167624 | 0.01409616 | 11.0118818 | 1.62187931 | 74.7660699 | cg15287024 | 0.02542582 | 2183.40727 | 2.57478099 | 1851523.42 |
| cg17453374 | 0.01409943 | 19.9539713 | 1.82820468 | 217.787963 | cg07450214 | 0.02543498 | 319.047188 | 2.03168888 | 50101.7204 |
| cg05894734 | 0.01410124 | 10.1823488 | 1.59631873 | 64.9495783 | cg18722881 | 0.02543506 | 5.87481234 | 1.24322568 | 27.7611865 |
| cg18546689 | 0.01411027 | 6.18017379 | 1.44330282 | 26.4632948 | cg03318314 | 0.02543807 | 10.6130452 | 1.3369386  | 84.2497384 |
| cg10524033 | 0.01411185 | 6.16192319 | 1.44240878 | 26.3235347 | cg18988094 | 0.02544839 | 221385.394 | 4.53706817 | 1.0802E+10 |
| cg00884529 | 0.01411148 | 34.8163477 | 2.04434632 | 592.941645 | cg21271767 | 0.02545355 | 3215.98058 | 2.69678635 | 3835131.81 |
| cg03375056 | 0.01411701 | 15.7139809 | 1.74156916 | 141.785467 | cg27274426 | 0.02545394 | 0.16636297 | 0.03449838 | 0.802259   |
| cg15623249 | 0.01411904 | 158.341709 | 2.77317549 | 9040.93408 | cg01663570 | 0.02545779 | 97720.7475 | 4.10067576 | 2328724598 |

|            |            |            |            |            |            |            |            |            |            |
|------------|------------|------------|------------|------------|------------|------------|------------|------------|------------|
| cg09980339 | 0.01412302 | 159262312  | 44.8287536 | 5.6581E+14 | cg10282491 | 0.02546818 | 12.9186542 | 1.36901261 | 121.906566 |
| cg20941453 | 0.01412376 | 22.6893793 | 1.87497981 | 274.567187 | cg24775616 | 0.02547171 | 1.20E-05   | 5.76E-10   | 0.24884327 |
| cg05369939 | 0.01413103 | 127890.128 | 10.6649929 | 1533604861 | cg14099685 | 0.025503   | 66.5701434 | 1.67277583 | 2649.23961 |
| cg02277383 | 0.01413395 | 59.3233931 | 2.27453032 | 1547.24909 | cg08944390 | 0.0255133  | 56203267.6 | 8.89682665 | 3.5505E+14 |
| cg01697163 | 0.01415651 | 52.6208461 | 2.2186596  | 1248.02987 | cg11297817 | 0.02552237 | 1.00E-13   | 3.92E-25   | 0.02561654 |
| cg06347499 | 0.01417603 | 2978279253 | 80.0748914 | 1.1077E+17 | cg16936060 | 0.0255417  | 0.06101073 | 0.00524055 | 0.71028935 |
| cg12651953 | 0.01418051 | 0.18432077 | 0.04771789 | 0.71197924 | cg06199563 | 0.02555125 | 3520.02    | 2.71393023 | 4565534.01 |
| cg02478603 | 0.01418607 | 0.18565152 | 0.04833575 | 0.71306408 | cg07793638 | 0.02555845 | 16.7361975 | 1.41107813 | 198.50092  |
| cg16328610 | 0.0141918  | 4908944.14 | 22.0532552 | 1.0927E+12 | cg23017840 | 0.02557225 | 79.7782579 | 1.70720389 | 3728.06697 |
| cg14838256 | 0.01419223 | 80329685.1 | 38.6526177 | 1.6694E+14 | cg07048210 | 0.02557314 | 42.0145599 | 1.57857143 | 1118.24096 |
| cg02392575 | 0.01419226 | 45502.0808 | 8.61510594 | 240326627  | cg11055926 | 0.02557975 | 219926.299 | 4.48990034 | 1.0773E+10 |
| cg15687395 | 0.01419912 | 6.21029468 | 1.44277875 | 26.7315831 | cg18298494 | 0.02559614 | 15.3939676 | 1.39587739 | 169.76723  |
| cg08869573 | 0.0141999  | 4.45648222 | 1.34979133 | 14.7135586 | cg15253473 | 0.02560427 | 1935.75987 | 2.51657881 | 1488992.21 |
| cg16557944 | 0.01420246 | 7.42130771 | 1.49522209 | 36.8345335 | cg10616306 | 0.02560666 | 62293352.6 | 8.92013339 | 4.3502E+14 |
| cg14409958 | 0.01420544 | 4.11564452 | 1.32832015 | 12.7518428 | cg01973771 | 0.02561217 | 615.000465 | 2.18753179 | 172900.606 |
| cg17574799 | 0.0142062  | 693911.352 | 14.8652146 | 3.2392E+10 | cg01875529 | 0.02561242 | 832602.317 | 5.26831976 | 1.3158E+11 |
| cg00467420 | 0.01420774 | 5.97649711 | 1.43152589 | 24.9513598 | cg24539573 | 0.02561408 | 28.2264668 | 1.50249686 | 530.272938 |
| cg19778003 | 0.01420786 | 7.77294367 | 1.5090412  | 40.0377758 | cg08576623 | 0.02561514 | 11.1302841 | 1.34136507 | 92.3560829 |
| cg18231048 | 0.01421136 | 943.525679 | 3.95198529 | 225264.176 | cg11639692 | 0.02562391 | 489610.02  | 4.93373202 | 4.8588E+10 |
| cg07505018 | 0.01421455 | 5.73547296 | 1.41961097 | 23.1722991 | cg15190401 | 0.02564255 | 19829.9893 | 3.33466224 | 117921531  |
| cg25996388 | 0.01422248 | 0.12782398 | 0.02468199 | 0.66197944 | cg04665046 | 0.0256465  | 247.905499 | 1.95598797 | 31419.9971 |
| cg10968375 | 0.01422442 | 1.676E+11  | 178.107087 | 1.58E+20   | cg14067419 | 0.0256744  | 24.629734  | 1.47604301 | 410.979758 |
| cg05140069 | 0.01423817 | 10.9248319 | 1.61474574 | 73.9137743 | cg06997549 | 0.02569477 | 9.58173613 | 1.3156867  | 69.7807975 |
| cg06917617 | 0.01424603 | 4.67732098 | 1.36215888 | 16.0607782 | cg19311812 | 0.02570061 | 133.183164 | 1.81069595 | 9796.09814 |
| cg26977936 | 0.01424912 | 6.0619315  | 1.43472614 | 25.6125629 | cg16265348 | 0.02570357 | 8.69675359 | 1.3001509  | 58.1728807 |
| cg10439144 | 0.01425323 | 3662905790 | 82.310809  | 1.63E+17   | cg03301200 | 0.02570362 | 3.88140317 | 1.17889559 | 12.779156  |
| cg24425727 | 0.01425717 | 9.02687758 | 1.55362225 | 52.4480895 | cg26863085 | 0.02572153 | 0.00214014 | 9.65E-06   | 0.47459818 |
| cg01727686 | 0.01425964 | 10.6809842 | 1.60678387 | 71.0011001 | cg08321129 | 0.02572354 | 19.6446121 | 1.43478058 | 268.968502 |
| cg26279336 | 0.01426063 | 4.03700816 | 1.32234742 | 12.3246241 | cg11861043 | 0.02573114 | 2.45E-09   | 6.64E-17   | 0.09046877 |
| cg07127957 | 0.01426507 | 0.01718014 | 0.00066584 | 0.44328266 | cg27602828 | 0.02573596 | 18.4166836 | 1.42329106 | 238.302793 |

|            |            |            |            |            |            |            |            |            |            |
|------------|------------|------------|------------|------------|------------|------------|------------|------------|------------|
| cg21330423 | 0.01427716 | 6.2610305  | 1.44343208 | 27.1578437 | cg22597665 | 0.0257396  | 3693.96879 | 2.70496889 | 5044570.18 |
| cg23649435 | 0.01427723 | 6.33227532 | 1.44670211 | 27.7166325 | cg14007549 | 0.02575232 | 44.786595  | 1.58450503 | 1265.90895 |
| cg10671380 | 0.01427944 | 29.5784938 | 1.9692082  | 444.283796 | cg23316360 | 0.02575784 | 9.00223541 | 1.30468501 | 62.1147953 |
| cg23902823 | 0.01428005 | 72.1583749 | 2.35380161 | 2212.09427 | cg02748089 | 0.0257657  | 4.59717206 | 1.20268197 | 17.5723852 |
| cg26522239 | 0.01428333 | 8.34039779 | 1.52850997 | 45.5098343 | cg13668129 | 0.02577888 | 50.2022768 | 1.60556282 | 1569.71036 |
| cg23139584 | 0.01428448 | 11.9720733 | 1.64308421 | 87.2326191 | cg08805821 | 0.02579273 | 34.751578  | 1.53527482 | 786.616282 |
| cg26296574 | 0.0142893  | 8.09906194 | 1.51940244 | 43.1714486 | cg09080746 | 0.02579391 | 1.64E-11   | 5.43E-21   | 0.04978414 |
| cg20092936 | 0.01429246 | 4.48162045 | 1.34977048 | 14.8802497 | cg25303383 | 0.02581192 | 24.2764767 | 1.46962172 | 401.019741 |
| cg13239297 | 0.01429403 | 8846.23556 | 6.15370456 | 12716873.7 | cg19264170 | 0.02583086 | 10.5035077 | 1.32791559 | 83.0803361 |
| cg15775835 | 0.01430188 | 5.2173E+10 | 138.743517 | 1.9619E+19 | cg13037201 | 0.02584018 | 5.87458231 | 1.23792481 | 27.8778784 |
| cg17164093 | 0.01430721 | 20.5490614 | 1.82955122 | 230.801915 | cg01678172 | 0.02584468 | 109.340558 | 1.76078016 | 6789.80706 |
| cg25815972 | 0.01430781 | 3604629348 | 81.2396827 | 1.5994E+17 | cg06900571 | 0.02584645 | 0.18885006 | 0.04359793 | 0.81802834 |
| cg15905666 | 0.01431243 | 0.23019187 | 0.0710609  | 0.74567445 | cg09478396 | 0.025853   | 6.57232398 | 1.25460681 | 34.4294661 |
| cg11009736 | 0.01431294 | 0.13883755 | 0.02859778 | 0.67403349 | cg27179932 | 0.02585508 | 2754.76772 | 2.59640346 | 2922791.22 |
| cg00520042 | 0.01431326 | 40.8851591 | 2.09879712 | 796.454419 | cg25924823 | 0.02585699 | 3.50E-07   | 7.36E-13   | 0.16691366 |
| cg25591377 | 0.01431702 | 19.8416275 | 1.81634955 | 216.748028 | cg13866214 | 0.02586972 | 13.4068399 | 1.36676312 | 131.510246 |
| cg16983817 | 0.01432073 | 58.3126273 | 2.25252015 | 1509.58139 | cg22016779 | 0.02587247 | 39.1049389 | 1.55462894 | 983.640671 |
| cg15190760 | 0.01432112 | 11.0114282 | 1.61465541 | 75.0943823 | cg20011278 | 0.0258766  | 261.48639  | 1.95381522 | 34995.7004 |
| cg13891250 | 0.01433027 | 64206.1971 | 9.11635626 | 452202133  | cg14970695 | 0.02588043 | 8.48813961 | 1.29342068 | 55.7038518 |
| cg09834465 | 0.01433164 | 7.04569443 | 1.4766459  | 33.6179513 | cg09254823 | 0.02589362 | 1152.77742 | 2.33400056 | 569363.952 |
| cg07382273 | 0.0143324  | 15113077.3 | 27.115329  | 8.4235E+12 | cg08680048 | 0.02590392 | 4.82368093 | 1.20814228 | 19.2592364 |
| cg18552861 | 0.01433352 | 4.15912175 | 1.32912453 | 13.0148028 | cg02133520 | 0.02592032 | 52329.2722 | 3.68612038 | 742882069  |
| cg13835029 | 0.01434457 | 17.4106438 | 1.76839791 | 171.415334 | cg18884037 | 0.02592981 | 8.3330311  | 1.28975465 | 53.8392376 |
| cg10859966 | 0.01434466 | 99656.7599 | 9.93914472 | 999227808  | cg11725331 | 0.02593314 | 20909.7397 | 3.2991888  | 132522641  |
| cg24507955 | 0.01434556 | 22.8695928 | 1.86724793 | 280.101141 | cg07800892 | 0.0259403  | 0.13071515 | 0.02180963 | 0.7834362  |
| cg04377145 | 0.0143496  | 7.85354416 | 1.5085357  | 40.8861096 | cg22484599 | 0.02595068 | 11718597.7 | 7.03842182 | 1.9511E+13 |
| cg02897882 | 0.01435342 | 969.401919 | 3.94167338 | 238411.454 | cg07287384 | 0.02595287 | 1021.37149 | 2.29470521 | 454611.652 |
| cg00169792 | 0.0143543  | 6.71046031 | 1.46182695 | 30.8041095 | cg27109600 | 0.0259552  | 9.65872419 | 1.31236299 | 71.0862417 |
| cg25075644 | 0.01436724 | 717930.641 | 14.701973  | 3.5058E+10 | cg22628500 | 0.02596065 | 8.58777491 | 1.29391667 | 56.9973938 |
| cg15841063 | 0.01437098 | 3.98913888 | 1.31753842 | 12.078     | cg01016800 | 0.02596631 | 145.78749  | 1.81637197 | 11701.3433 |

|            |            |            |            |            |            |            |            |            |            |
|------------|------------|------------|------------|------------|------------|------------|------------|------------|------------|
| cg00917031 | 0.01437537 | 34.546024  | 2.02566686 | 589.153031 | cg07365623 | 0.02596977 | 1.53E-05   | 8.88E-10   | 0.26508195 |
| cg05233094 | 0.01438082 | 15368.0264 | 6.825136   | 34603887   | cg26092468 | 0.02597584 | 1597517963 | 12.6478388 | 2.0178E+17 |
| cg10672880 | 0.01438898 | 27914.3801 | 7.68169493 | 101437589  | cg03929531 | 0.02597843 | 0.20854467 | 0.05246945 | 0.82887994 |
| cg16347136 | 0.01438904 | 17996.9903 | 7.03863766 | 46016243.1 | cg04458206 | 0.02598071 | 1359.44781 | 2.37190447 | 779162.212 |
| cg06479512 | 0.01439448 | 245.679065 | 2.99207222 | 20172.7093 | cg06545845 | 0.02598183 | 546476.366 | 4.86195693 | 6.1423E+10 |
| cg01501474 | 0.0143954  | 3896663593 | 81.2145855 | 1.8696E+17 | cg07207099 | 0.02598369 | 4.56048187 | 1.1991654  | 17.3437249 |
| cg02947424 | 0.0143997  | 307420563  | 48.9464569 | 1.9308E+15 | cg05126887 | 0.02598675 | 17.5923469 | 1.4093998  | 219.590402 |
| cg13895322 | 0.01441165 | 10.4068105 | 1.59377139 | 67.9530984 | cg00152259 | 0.02600267 | 55.3629736 | 1.6160544  | 1896.63098 |
| cg18394533 | 0.01441406 | 13.7723098 | 1.68506734 | 112.563167 | cg13440296 | 0.02600845 | 145277611  | 9.45726051 | 2.2317E+15 |
| cg16379337 | 0.01441843 | 14779172.9 | 26.6821027 | 8.1862E+12 | cg09251737 | 0.0260188  | 79.3647204 | 1.68646939 | 3734.87884 |
| cg22956956 | 0.01442247 | 48874.647  | 8.5628694  | 278963863  | cg20170831 | 0.02601925 | 8.801827   | 1.29676266 | 59.7427431 |
| cg15458254 | 0.01442834 | 7.65505331 | 1.49888185 | 39.0957041 | cg07956775 | 0.02602378 | 28.2449925 | 1.49047315 | 535.25258  |
| cg07328579 | 0.01443053 | 9.26300766 | 1.5567363  | 55.1174345 | cg02670545 | 0.02602575 | 0.04665855 | 0.00313944 | 0.69344309 |
| cg05628567 | 0.01443896 | 369192998  | 50.44272   | 2.7021E+15 | cg22412649 | 0.02603897 | 10.613653  | 1.32572694 | 84.9719701 |
| cg20969846 | 0.01444484 | 2283.78092 | 4.64936392 | 1121799.76 | cg11596902 | 0.02604076 | 0.16612413 | 0.03419098 | 0.80714929 |
| cg06007678 | 0.01444708 | 51.7942185 | 2.19084212 | 1224.47941 | cg15687395 | 0.026046   | 6.8424658  | 1.25794578 | 37.2188841 |
| cg06439941 | 0.01445498 | 0.07666224 | 0.00978845 | 0.6004118  | cg10501305 | 0.02604622 | 1552.95132 | 2.40315234 | 1003539.29 |
| cg17661462 | 0.01445636 | 14.1833348 | 1.6934008  | 118.794667 | cg16007619 | 0.02604757 | 13.9199006 | 1.3691593  | 141.520152 |
| cg15028904 | 0.01445716 | 52.3912826 | 2.19512099 | 1250.43061 | cg14089714 | 0.02605413 | 7.40058279 | 1.26964887 | 43.1368283 |
| cg16480966 | 0.01445752 | 1628810719 | 67.5341074 | 3.9284E+16 | cg08406071 | 0.02606357 | 119103.316 | 4.02864902 | 3521180367 |
| cg00661523 | 0.01445947 | 6.50952803 | 1.45064774 | 29.2103687 | cg11756870 | 0.02607003 | 8.24975652 | 1.28595155 | 52.9246085 |
| cg06447369 | 0.01446236 | 176281.061 | 11.0081676 | 2822905111 | cg18909638 | 0.02609327 | 0.00014716 | 6.19E-08   | 0.34977403 |
| cg12747410 | 0.01446733 | 7.2343232  | 1.48119356 | 35.3332836 | cg26995224 | 0.02610781 | 7.62759796 | 1.2734134  | 45.6884234 |
| cg19251352 | 0.01446822 | 2575667.31 | 18.7358602 | 3.5408E+11 | cg11931463 | 0.02615468 | 17.1519101 | 1.40117956 | 209.957401 |
| cg05703009 | 0.01448205 | 0.15034876 | 0.03292053 | 0.68664593 | cg10020934 | 0.02620005 | 0.10389898 | 0.01411474 | 0.76480306 |
| cg08500417 | 0.01448224 | 19.1217293 | 1.79580373 | 203.608292 | cg27180443 | 0.02625598 | 0.05543844 | 0.00432478 | 0.71065447 |
| cg14013195 | 0.01449383 | 6.21648142 | 1.43670157 | 26.8981687 | cg23637705 | 0.0262648  | 5.583E+13  | 41.9406478 | 7.43E+25   |
| cg02000318 | 0.01449385 | 7.20352449 | 1.4793069  | 35.077755  | cg18223453 | 0.02627891 | 12.7377396 | 1.35005012 | 120.180731 |
| cg20707970 | 0.01449449 | 15.9016699 | 1.73081146 | 146.095119 | cg10030624 | 0.02629039 | 43.4662668 | 1.55996846 | 1211.12471 |
| cg12206225 | 0.01449858 | 2756956.52 | 18.9209093 | 4.0171E+11 | cg03214395 | 0.02629469 | 5523.97927 | 2.76099762 | 11051928.1 |

|            |            |            |            |            |            |            |            |            |            |
|------------|------------|------------|------------|------------|------------|------------|------------|------------|------------|
| cg03841667 | 0.01450274 | 151.858427 | 2.70669329 | 8519.98342 | cg07502066 | 0.0263191  | 50775.9866 | 3.58046788 | 720073716  |
| cg03469057 | 0.01450772 | 133042.257 | 10.3645288 | 1707771033 | cg23418097 | 0.0263293  | 285619.865 | 4.38446893 | 1.8606E+10 |
| cg08932256 | 0.01452256 | 0.16697482 | 0.03974429 | 0.70149934 | cg09230763 | 0.02632951 | 22.9362311 | 1.44568786 | 363.889545 |
| cg09358240 | 0.01452374 | 2.4222E+10 | 113.957698 | 5.1485E+18 | cg16983817 | 0.02633334 | 102.057762 | 1.72309459 | 6044.8143  |
| cg15778054 | 0.01453671 | 7.01951933 | 1.47073359 | 33.5027717 | cg08655788 | 0.02635643 | 47.9046377 | 1.57558659 | 1456.50789 |
| cg10396171 | 0.01453763 | 5.20483421 | 1.38616103 | 19.5433997 | cg01639898 | 0.02635699 | 17.7430935 | 1.4020235  | 224.544999 |
| cg03723902 | 0.01453996 | 6.50E-11   | 4.39E-19   | 0.00963034 | cg23437162 | 0.02635845 | 61.9747672 | 1.62390953 | 2365.20059 |
| cg07402729 | 0.01454341 | 5.24764971 | 1.38830244 | 19.8356112 | cg13722431 | 0.02635974 | 4.54569977 | 1.19468806 | 17.2960517 |
| cg21278181 | 0.0145532  | 9.25650035 | 1.55305528 | 55.1704758 | cg23733260 | 0.02637071 | 9.87018522 | 1.30842472 | 74.4563706 |
| cg18344652 | 0.01455843 | 8.31813104 | 1.52042308 | 45.5079279 | cg02447380 | 0.02637272 | 30.9193647 | 1.49609053 | 639.003521 |
| cg05724197 | 0.0145587  | 8.09938641 | 1.51242364 | 43.3741303 | cg24965497 | 0.02638446 | 8.65E-05   | 2.24E-08   | 0.33361932 |
| cg03258142 | 0.01456284 | 467.06777  | 3.37178134 | 64699.4215 | cg23732368 | 0.02638791 | 2346.33886 | 2.48539036 | 2215066.96 |
| cg03743720 | 0.01456294 | 14.6856184 | 1.70116862 | 126.776022 | cg15516684 | 0.02639363 | 3945464.88 | 5.93737684 | 2.6218E+12 |
| cg26795312 | 0.0145633  | 0.1046962  | 0.01712628 | 0.64002781 | cg26009944 | 0.02639584 | 43.0015026 | 1.55437156 | 1189.6314  |
| cg17941202 | 0.01456346 | 608.904189 | 3.55319878 | 104346.628 | cg21943938 | 0.02639858 | 74.6815888 | 1.65820188 | 3363.48655 |
| cg04491089 | 0.01456827 | 10.764756  | 1.59966539 | 72.4401325 | cg26149645 | 0.02639885 | 497.827582 | 2.07125054 | 119653.464 |
| cg16697493 | 0.01456935 | 61.3894307 | 2.25680371 | 1669.91138 | cg14832904 | 0.02640101 | 8.29962576 | 1.28158682 | 53.7488266 |
| cg02572755 | 0.01457046 | 2.0414E+10 | 109.171796 | 3.8174E+18 | cg25014411 | 0.02640359 | 41.3207963 | 1.54685997 | 1103.78977 |
| cg04904385 | 0.01457402 | 6.69978372 | 1.45638151 | 30.8209777 | cg25362068 | 0.02640428 | 12881.8865 | 3.03224734 | 54726076.1 |
| cg05129081 | 0.01457657 | 7.39478362 | 1.48501061 | 36.8231878 | cg12829717 | 0.02642999 | 37.8198286 | 1.53002972 | 934.844217 |
| cg06116248 | 0.01458041 | 1034042.27 | 15.4344583 | 6.9276E+10 | cg07684809 | 0.02643812 | 4.15951045 | 1.18151793 | 14.6434741 |
| cg05040724 | 0.01458289 | 0.04881287 | 0.00432705 | 0.55065144 | cg27115340 | 0.02644396 | 1136.77095 | 2.27756216 | 567382.179 |
| cg13623495 | 0.01458576 | 9.13976344 | 1.54825316 | 53.9545327 | cg19872537 | 0.02646477 | 556875.331 | 4.69323343 | 6.6076E+10 |
| cg08817644 | 0.014588   | 32.877478  | 1.99365649 | 542.183955 | cg04726784 | 0.02648125 | 6.85527544 | 1.25204679 | 37.5343812 |
| cg02806452 | 0.01459281 | 5.90500598 | 1.42009631 | 24.5540358 | cg21080336 | 0.02648987 | 13.5040849 | 1.35501642 | 134.581624 |
| cg06927775 | 0.0145933  | 35.0511422 | 2.01872015 | 608.594793 | cg14889011 | 0.02649436 | 64721.6597 | 3.64254821 | 1149989786 |
| cg05435286 | 0.01459489 | 11.7307311 | 1.62620806 | 84.6202004 | cg16793187 | 0.0265082  | 15.6936622 | 1.37858407 | 178.65507  |
| cg02275713 | 0.01460206 | 10.3745211 | 1.58701009 | 67.819788  | cg13344237 | 0.02652091 | 2096.04235 | 2.43815388 | 1801934.47 |
| cg21365903 | 0.01461231 | 5296233.57 | 21.2291954 | 1.3213E+12 | cg23975712 | 0.02652405 | 789677.34  | 4.86580023 | 1.2816E+11 |
| cg10020934 | 0.01461908 | 0.10836693 | 0.01820529 | 0.64505362 | cg16098981 | 0.02653307 | 8.51258419 | 1.28327299 | 56.4681795 |



|             |            |            |            |            |            |            |            |            |            |
|-------------|------------|------------|------------|------------|------------|------------|------------|------------|------------|
| cg02692405  | 0.01463066 | 1673.10991 | 4.32178021 | 647718.449 | cg06787764 | 0.0265387  | 6.36190509 | 1.24040322 | 32.6295802 |
| cg00376785  | 0.01463119 | 167926071  | 41.8712469 | 6.7347E+14 | cg27621129 | 0.02655576 | 13.3502741 | 1.35185567 | 131.840863 |
| cg27316993  | 0.01463958 | 5481418729 | 83.1295775 | 3.6144E+17 | cg11597832 | 0.02655877 | 15.8265074 | 1.37881361 | 181.662216 |
| cg21384402  | 0.01464266 | 4.12995223 | 1.32251701 | 12.8970027 | cg00547414 | 0.02657868 | 57.1221518 | 1.60006298 | 2039.25737 |
| cg14398359  | 0.01464675 | 0.01356109 | 0.00042919 | 0.42849108 | cg22878324 | 0.02658307 | 2.1252E+10 | 15.8401197 | 2.8514E+19 |
| cg11204680  | 0.01464948 | 0.02481803 | 0.00127595 | 0.48272676 | cg23352722 | 0.02658356 | 6.85560985 | 1.25061319 | 37.5810736 |
| cg00689612  | 0.0146526  | 22.1759555 | 1.84145717 | 267.056444 | cg18480675 | 0.02658742 | 23.1823429 | 1.44065109 | 373.040374 |
| cg04782146  | 0.01465301 | 0.01406652 | 0.00045836 | 0.43168563 | cg19274820 | 0.02661233 | 236413.951 | 4.20101172 | 1.3304E+10 |
| cg14632140  | 0.01465399 | 8.91589861 | 1.53882021 | 51.6585677 | cg17610800 | 0.02661491 | 8.53764027 | 1.28239711 | 56.8398829 |
| cg12156831  | 0.01465779 | 1989.08287 | 4.46428111 | 886245.863 | cg23500601 | 0.02661891 | 14535811.5 | 6.76983907 | 3.121E+13  |
| cg23460835  | 0.01465889 | 4.49053521 | 1.34425137 | 15.0008451 | cg24869272 | 0.02662145 | 11.4703129 | 1.32695401 | 99.150444  |
| cg02746725  | 0.01465944 | 7.15113844 | 1.47325857 | 34.7113413 | cg05740582 | 0.02662175 | 0.18368655 | 0.041066   | 0.82162258 |
| cg22450798  | 0.01466043 | 213.529359 | 2.87603806 | 15853.3323 | cg24096828 | 0.02662542 | 110.81108  | 1.72591148 | 7114.55685 |
| cg19629053  | 0.01466611 | 18.4036577 | 1.77447138 | 190.870713 | cg01256539 | 0.02665474 | 0.06774584 | 0.00626751 | 0.73226786 |
| cg04481181  | 0.01466785 | 6.23960748 | 1.43403957 | 27.1489729 | cg12636538 | 0.02666559 | 122766.595 | 3.87935496 | 3885088394 |
| cg05928186  | 0.01466947 | 29.2139509 | 1.94332612 | 439.172263 | cg22492252 | 0.02667816 | 8975788.33 | 6.36644426 | 1.2655E+13 |
| cg08553950  | 0.01468531 | 0.08454352 | 0.01162143 | 0.61503672 | cg10334121 | 0.02668711 | 6.46312972 | 1.24067807 | 33.6687227 |
| cg22698604  | 0.01469427 | 776905.58  | 14.4050162 | 4.1901E+10 | cg27559724 | 0.02675677 | 231413.518 | 4.14725446 | 1.2913E+10 |
| cg11514288  | 0.01470145 | 7.85482835 | 1.49969477 | 41.1405904 | cg02953545 | 0.02677275 | 9.86890364 | 1.30138902 | 74.8394659 |
| cg09230763  | 0.01470794 | 16.0096847 | 1.72482066 | 148.600959 | cg13212159 | 0.02677433 | 6378.16648 | 2.74004908 | 14846817.1 |
| cg21661347  | 0.01470795 | 490.908822 | 3.38038631 | 71291.1037 | cg06236987 | 0.02677582 | 62.9613362 | 1.61057584 | 2461.31214 |
| cg03562744  | 0.01470864 | 15638.3259 | 6.67456004 | 36640203.1 | cg26640895 | 0.02677904 | 1.0753E+17 | 91.0196517 | 1.27E+32   |
| cg06295928  | 0.01471543 | 0.12854926 | 0.02472944 | 0.66822843 | cg01404317 | 0.02679409 | 22.0563487 | 1.42701673 | 340.908771 |
| ch.7.103954 | 0.01472282 | 6262067027 | 84.0522669 | 4.6654E+17 | cg20263444 | 0.02679596 | 112471.291 | 3.80648463 | 3323221403 |
| cg10608717  | 0.01472292 | 10582693.9 | 23.9863852 | 4.669E+12  | cg27616378 | 0.02681148 | 60895.0632 | 3.54378703 | 1046397169 |
| cg08336736  | 0.01472785 | 2085821.01 | 17.4242717 | 2.4969E+11 | cg04614943 | 0.02682339 | 3610704.95 | 5.65755138 | 2.3044E+12 |
| cg24818238  | 0.01474529 | 13.6788603 | 1.67097051 | 111.97757  | cg14516246 | 0.02682476 | 71131764.5 | 7.96407055 | 6.3532E+14 |
| cg17765480  | 0.0147491  | 4060.19868 | 5.10654194 | 3228253.78 | cg04604946 | 0.02682711 | 24.8976549 | 1.4461382  | 428.654207 |
| cg13677279  | 0.01475705 | 1.5064E+15 | 949.478202 | 2.39E+27   | cg25369015 | 0.02682854 | 125.702513 | 1.74133849 | 9074.12425 |
| cg23433889  | 0.01475871 | 8.5866841  | 1.52467644 | 48.3585512 | cg27505984 | 0.026834   | 7.3514E+13 | 38.9598417 | 1.39E+26   |

|            |            |            |            |            |            |            |            |            |            |
|------------|------------|------------|------------|------------|------------|------------|------------|------------|------------|
| cg08101193 | 0.01476835 | 0.12039306 | 0.02195225 | 0.66027345 | cg03895540 | 0.02684162 | 0.1401426  | 0.02460367 | 0.79825296 |
| cg22708290 | 0.01477747 | 1559.53953 | 4.22522152 | 575629.829 | cg25518276 | 0.02686374 | 16.1059733 | 1.37481868 | 188.681154 |
| cg12623536 | 0.0147794  | 12.2298967 | 1.63352378 | 91.5630219 | cg17530152 | 0.02692688 | 10.8503638 | 1.31285816 | 89.6748769 |
| cg06104975 | 0.01478841 | 14.5157046 | 1.68898522 | 124.752827 | cg13250618 | 0.02692843 | 5527314.42 | 5.88490649 | 5.1915E+12 |
| cg21745320 | 0.01479225 | 2473896.99 | 17.8807282 | 3.4228E+11 | cg07117012 | 0.02694573 | 16.2206741 | 1.37411329 | 191.476402 |
| cg07117012 | 0.0147927  | 14.2087861 | 1.68177383 | 120.045632 | cg16553500 | 0.02695842 | 9.90653822 | 1.29874318 | 75.564978  |
| cg22673001 | 0.01479981 | 1424.39763 | 4.14539005 | 489437.322 | cg09676684 | 0.02696035 | 5.79159489 | 1.22163478 | 27.4571188 |
| cg09339476 | 0.01480298 | 385.506227 | 3.20884029 | 46314.256  | cg03912887 | 0.02696201 | 131950.258 | 3.83318291 | 4542144494 |
| cg10810752 | 0.01480396 | 5.35394065 | 1.38889506 | 20.6384783 | cg06649280 | 0.02697367 | 9.69971676 | 1.29536321 | 72.6317566 |
| cg06998765 | 0.01480849 | 13.3107221 | 1.65985494 | 106.74145  | cg14172427 | 0.02699086 | 0.09152346 | 0.0109962  | 0.76176726 |
| cg09952946 | 0.01480961 | 14.0694511 | 1.6779258  | 117.972711 | cg26523099 | 0.02700841 | 9.73864692 | 1.29536075 | 73.2160861 |
| cg09524686 | 0.01481455 | 10.6279868 | 1.58812486 | 71.1241964 | cg20704635 | 0.02700965 | 937.984077 | 2.17727161 | 404090.204 |
| cg07098902 | 0.01482516 | 6.39905766 | 1.43778677 | 28.4798411 | cg11481534 | 0.02701669 | 44.972628  | 1.54119748 | 1312.31545 |
| cg22588983 | 0.01482687 | 6.82517894 | 1.45599547 | 31.9939647 | cg00102996 | 0.02702701 | 8085705.1  | 6.09049474 | 1.0735E+13 |
| cg24129356 | 0.01482976 | 6.72864437 | 1.4518797  | 31.1834755 | cg02595823 | 0.02704854 | 8.01686061 | 1.26640837 | 50.7498652 |
| cg18782736 | 0.01483189 | 14.3392598 | 1.68337169 | 122.144368 | cg00364457 | 0.02705581 | 29.3741814 | 1.46724447 | 588.070053 |
| cg23180925 | 0.01483235 | 11.9067549 | 1.62325653 | 87.3372816 | cg07830449 | 0.02706527 | 16.4686435 | 1.37382538 | 197.416806 |
| cg11875676 | 0.01483684 | 2005356013 | 65.8935823 | 6.103E+16  | cg13062913 | 0.02706888 | 22.9645823 | 1.42650643 | 369.694821 |
| cg03596993 | 0.01484151 | 40205.942  | 7.94505579 | 203462104  | cg16155498 | 0.02708179 | 3.4238E+11 | 20.2560776 | 5.79E+21   |
| cg06649280 | 0.01485048 | 9.38015405 | 1.548774   | 56.8109291 | cg08089542 | 0.02710551 | 168.444429 | 1.78604908 | 15886.1959 |
| cg06892501 | 0.01485461 | 0.1417727  | 0.02944094 | 0.6827056  | cg24548682 | 0.02711203 | 1145.89881 | 2.21812293 | 591979.851 |
| cg23725690 | 0.01485988 | 137.144765 | 2.61506989 | 7192.42216 | cg23264429 | 0.02712152 | 0.19352923 | 0.04509434 | 0.83056009 |
| cg11897145 | 0.01486356 | 826.182201 | 3.71316596 | 183826.157 | cg25706502 | 0.02712258 | 0.12101902 | 0.01859428 | 0.78764009 |
| cg02965178 | 0.01486595 | 14.5552064 | 1.6870615  | 125.575761 | cg06963233 | 0.02712478 | 7.68934437 | 1.25929555 | 46.9516604 |
| cg09285418 | 0.01487114 | 16.3136564 | 1.72485987 | 154.293917 | cg07447260 | 0.02712701 | 7.94E-13   | 1.47E-23   | 0.04290499 |
| cg04762213 | 0.01487537 | 157.274601 | 2.68428474 | 9214.85709 | cg27313566 | 0.02712748 | 0.16939013 | 0.03506866 | 0.8181955  |
| cg20912226 | 0.0148774  | 677468.77  | 13.7468369 | 3.3387E+10 | cg27372920 | 0.02713432 | 4.45308252 | 1.1838022  | 16.751062  |
| cg17610800 | 0.01487905 | 6.59646904 | 1.44517563 | 30.1094226 | cg20118643 | 0.02713898 | 869.872678 | 2.14778533 | 352306.38  |
| cg09508736 | 0.01488174 | 0.05649216 | 0.00559175 | 0.57072747 | cg18469624 | 0.02714661 | 15638.4058 | 2.97522455 | 82198749.3 |
| cg18294691 | 0.01488268 | 5.44798237 | 1.3921424  | 21.3200258 | cg01458759 | 0.02715301 | 7794307337 | 13.0738908 | 4.6468E+18 |

|            |            |            |            |            |            |            |            |            |            |
|------------|------------|------------|------------|------------|------------|------------|------------|------------|------------|
| cg07472647 | 0.01488664 | 5996.37141 | 5.4597406  | 6585746.97 | cg22416074 | 0.02715968 | 6596.56074 | 2.69717057 | 16133430.4 |
| cg04308089 | 0.01489795 | 0.10979937 | 0.01854891 | 0.64995205 | cg10554436 | 0.02716951 | 12.6968294 | 1.33186443 | 121.040455 |
| cg04184179 | 0.01490406 | 0.02638919 | 0.00141467 | 0.49226256 | cg13983182 | 0.02717151 | 18.7285847 | 1.39149422 | 252.074267 |
| cg15851312 | 0.01491073 | 702328013  | 53.0269648 | 9.3021E+15 | cg25418309 | 0.0271723  | 7.9322E+11 | 21.9615419 | 2.87E+22   |
| cg01850783 | 0.01491904 | 6.51510793 | 1.4408116  | 29.4602232 | cg12661343 | 0.02717342 | 507.603009 | 2.01851366 | 127648.784 |
| cg26631984 | 0.01492114 | 5.31124814 | 1.38453947 | 20.3745415 | cg13763617 | 0.02717703 | 305.534558 | 1.90600446 | 48977.5172 |
| cg07535628 | 0.01492413 | 18.6067239 | 1.76752688 | 195.872651 | cg27035169 | 0.02718245 | 7.5440093  | 1.2557369  | 45.3216564 |
| cg08815403 | 0.01492643 | 24.3762623 | 1.86291539 | 318.963581 | cg23332610 | 0.0271839  | 0.07968377 | 0.00844379 | 0.75197341 |
| cg01932843 | 0.01492813 | 8.85E-05   | 4.82E-08   | 0.16236314 | cg06813515 | 0.02719204 | 28.6298225 | 1.45911995 | 561.754182 |
| cg13337238 | 0.01493008 | 12.1697156 | 1.62700992 | 91.0270888 | cg04574507 | 0.02719298 | 0.18990172 | 0.04348284 | 0.82935398 |
| cg07395004 | 0.01493849 | 14285.7172 | 6.44182685 | 31680720.7 | cg14638883 | 0.02721368 | 5.47179296 | 1.21073246 | 24.7292605 |
| cg10391522 | 0.01493991 | 10.7259094 | 1.58717949 | 72.4840092 | cg08718097 | 0.02724052 | 0.23687354 | 0.06596452 | 0.85059472 |
| cg27565794 | 0.01494048 | 2.06E-13   | 1.25E-23   | 0.00338807 | cg08267698 | 0.02725243 | 45565316.5 | 7.24392244 | 2.8661E+14 |
| cg03327649 | 0.01494197 | 34.4278139 | 1.99164387 | 595.123651 | cg02086523 | 0.02725383 | 3.2349E+13 | 32.8766402 | 3.18E+25   |
| cg13811955 | 0.01494323 | 12.5551185 | 1.63648406 | 96.3229668 | cg13169065 | 0.02725961 | 14488.7969 | 2.93131389 | 71614724   |
| cg00648423 | 0.01494528 | 33.8248239 | 1.98461868 | 576.49297  | cg26577320 | 0.02726333 | 10.6049573 | 1.30343085 | 86.2839168 |
| cg02247068 | 0.01496102 | 19.1350132 | 1.77564407 | 206.206152 | cg01476047 | 0.02726595 | 144.205195 | 1.74686604 | 11904.2547 |
| cg20729316 | 0.01496538 | 136469860  | 38.2151272 | 4.8735E+14 | cg13878456 | 0.02727042 | 162.69072  | 1.77043663 | 14950.1372 |
| cg02064106 | 0.01496688 | 7.41335902 | 1.47640106 | 37.2242295 | cg04795713 | 0.0272752  | 4051.79049 | 2.53876354 | 6466536.13 |
| cg07338077 | 0.01496711 | 559522.722 | 13.1174829 | 2.3866E+10 | cg15689069 | 0.027278   | 7911.82712 | 2.73624777 | 22876951.8 |
| cg03429689 | 0.0149764  | 41.5102057 | 2.06339563 | 835.078429 | cg26433777 | 0.02728035 | 17746.8556 | 2.99531115 | 105147969  |
| cg18497587 | 0.01498602 | 14.3110113 | 1.67719186 | 122.111876 | cg27020690 | 0.02728083 | 1135.50427 | 2.20070201 | 585890.295 |
| cg23008404 | 0.01498716 | 7.61463028 | 1.48362385 | 39.081735  | cg05471775 | 0.02728239 | 1.25E-06   | 7.14E-12   | 0.21779395 |
| cg10811426 | 0.01499275 | 12.0790945 | 1.62261244 | 89.9195151 | cg04129227 | 0.02728569 | 119.528228 | 1.70953089 | 8357.26184 |
| cg23655939 | 0.01499446 | 78.5093734 | 2.33407239 | 2640.75859 | cg03317826 | 0.02729067 | 1767118429 | 10.8722517 | 2.8722E+17 |
| cg03122532 | 0.0150003  | 9.84264341 | 1.55911842 | 62.1361586 | cg23487303 | 0.02730934 | 19389374.5 | 6.54510611 | 5.744E+13  |
| cg11596902 | 0.01500066 | 0.170721   | 0.04108418 | 0.70941327 | cg11802553 | 0.02731717 | 22.9045252 | 1.41969693 | 369.527653 |
| cg22120345 | 0.01500845 | 37.8510783 | 2.02482148 | 707.57059  | cg00058923 | 0.02731872 | 318.705635 | 1.9060953  | 53288.6694 |
| cg20809087 | 0.01502114 | 6.63191492 | 1.44357486 | 30.4676236 | cg26593267 | 0.02731907 | 6.27019418 | 1.22805832 | 32.0142248 |
| cg09686443 | 0.01503829 | 6.35547446 | 1.43133428 | 28.2198619 | cg08872550 | 0.02732157 | 1214.86593 | 2.21374168 | 666698.94  |

|            |            |            |            |            |            |            |            |            |            |
|------------|------------|------------|------------|------------|------------|------------|------------|------------|------------|
| cg01063425 | 0.01505227 | 0.00676308 | 0.00012045 | 0.37973304 | cg04377288 | 0.02733474 | 7.32477624 | 1.24938415 | 42.9430348 |
| cg01181415 | 0.0150535  | 5.00408728 | 1.36622893 | 18.3284726 | cg02519806 | 0.02734101 | 7.54658713 | 1.25346721 | 45.4347564 |
| cg16974909 | 0.0150579  | 16.0791507 | 1.71285909 | 150.940079 | cg04351402 | 0.02734111 | 107.708595 | 1.68717169 | 6876.08828 |
| cg20791007 | 0.01505827 | 12.5698    | 1.63304845 | 96.7514902 | cg23187101 | 0.02734415 | 20681314.6 | 6.57032173 | 6.5098E+13 |
| cg16860848 | 0.01505889 | 212217382  | 41.0491458 | 1.0971E+15 | cg02077702 | 0.02734918 | 27.0520185 | 1.44550864 | 506.265878 |
| cg15831653 | 0.01506064 | 4820.83935 | 5.17069952 | 4494651.45 | cg01316923 | 0.02736576 | 154.537142 | 1.75538892 | 13604.8074 |
| cg02576345 | 0.01506303 | 14801.9645 | 6.42476063 | 34102150.4 | cg24201890 | 0.02736632 | 15.4763831 | 1.35770454 | 176.414256 |
| cg08680048 | 0.01506743 | 4.42177602 | 1.33364317 | 14.6606705 | cg15084269 | 0.02736875 | 14.0544373 | 1.3431261  | 147.065274 |
| cg25250853 | 0.01508193 | 11606.462  | 6.12045909 | 22009780.5 | cg05368724 | 0.02737224 | 15.6506094 | 1.35927507 | 180.200152 |
| cg09004287 | 0.01508595 | 9.39806032 | 1.54281937 | 57.2481391 | cg00251738 | 0.02738083 | 4.4539E+10 | 15.4117517 | 1.29E+20   |
| cg02712555 | 0.01509125 | 409.551094 | 3.20226733 | 52379.1679 | cg15177964 | 0.02738184 | 866.807439 | 2.12669    | 353297.913 |
| cg05875017 | 0.0150997  | 10.9694411 | 1.58926407 | 75.7134329 | cg07233502 | 0.02742378 | 142878.25  | 3.74762662 | 5447232674 |
| cg19048532 | 0.01510247 | 14.9006152 | 1.68616206 | 131.676745 | cg00735304 | 0.0274364  | 106452094  | 7.81363959 | 1.4503E+15 |
| cg10824810 | 0.01511858 | 5.46969326 | 1.38876375 | 21.5425729 | cg13443371 | 0.02743991 | 2014.89784 | 2.33057137 | 1741981.97 |
| cg18975124 | 0.01511907 | 35250828.8 | 28.7498423 | 4.3222E+13 | cg23123694 | 0.02745761 | 6951.62297 | 2.67229008 | 18083763.5 |
| cg13886725 | 0.01512794 | 52.5403887 | 2.14979442 | 1284.07275 | cg06139836 | 0.02747659 | 9.26105207 | 1.28025826 | 66.992019  |
| cg18882819 | 0.01512932 | 9.64057404 | 1.54923207 | 59.9914433 | cg20941855 | 0.02752122 | 10.7126934 | 1.30032862 | 88.2559983 |
| cg09096430 | 0.0151381  | 1.5626E+11 | 145.121895 | 1.68E+20   | cg03991512 | 0.02752612 | 15.8447921 | 1.35782623 | 184.896589 |
| cg06160809 | 0.01514505 | 6.14102288 | 1.41964483 | 26.5645049 | cg07195622 | 0.02755591 | 97786323.9 | 7.64310992 | 1.2511E+15 |
| cg15372508 | 0.01515088 | 8.52673433 | 1.51236308 | 48.0739045 | cg08104023 | 0.02756313 | 0.11387745 | 0.01648697 | 0.78656524 |
| cg18318639 | 0.01515778 | 479021.968 | 12.4763721 | 1.8392E+10 | cg05598363 | 0.0275648  | 44.2303822 | 1.51998462 | 1287.07007 |
| cg19217130 | 0.01515832 | 0.17271632 | 0.04186283 | 0.71258746 | cg11939825 | 0.02757322 | 747.78899  | 2.07678388 | 269256.893 |
| cg07454803 | 0.01516007 | 29.570349  | 1.92216865 | 454.905735 | cg16044810 | 0.02757432 | 54.8885553 | 1.55633859 | 1935.79567 |
| cg09731694 | 0.01516304 | 4.7341392  | 1.34979279 | 16.6040848 | cg14826425 | 0.02757968 | 5.03849084 | 1.19547029 | 21.2354837 |
| cg21028142 | 0.01516314 | 20.3232066 | 1.78787072 | 231.019347 | cg07557790 | 0.02760317 | 29.5975659 | 1.45290977 | 602.938961 |
| cg19291355 | 0.01516567 | 1382.10505 | 4.03464831 | 473452.512 | cg02117713 | 0.02760711 | 5352.5934  | 2.5767541  | 11118738.9 |
| cg09844094 | 0.01516596 | 12.986765  | 1.6397972  | 102.851782 | cg17558126 | 0.02760824 | 9.73836819 | 1.28520937 | 73.790168  |
| cg26796245 | 0.01516949 | 5.84641997 | 1.4057518  | 24.3148375 | cg13052543 | 0.02761035 | 630.595344 | 2.03525891 | 195380.786 |
| cg24129382 | 0.01517151 | 5.4747778  | 1.38801951 | 21.5942152 | cg23655939 | 0.0276227  | 66.8396768 | 1.58871658 | 2812.04492 |
| cg05169244 | 0.01517244 | 942102.427 | 14.1929715 | 6.2535E+10 | cg01729401 | 0.02763794 | 2146.46709 | 2.32666133 | 1980228.45 |

|            |            |            |            |            |            |            |            |            |            |
|------------|------------|------------|------------|------------|------------|------------|------------|------------|------------|
| cg13301722 | 0.01518724 | 103718.515 | 9.26172366 | 1161504149 | cg16818414 | 0.0276417  | 10.1265973 | 1.29018752 | 79.4829987 |
| cg07488684 | 0.01518866 | 41.7295499 | 2.05250971 | 848.40297  | cg12019705 | 0.02766087 | 0.08137151 | 0.00872428 | 0.75895374 |
| cg18727742 | 0.0151916  | 13.9896446 | 1.66260241 | 117.713144 | cg05590982 | 0.0276613  | 6.46832197 | 1.22782911 | 34.0757431 |
| cg06485940 | 0.01519536 | 9.30046229 | 1.53671986 | 56.2878121 | cg12910906 | 0.02767137 | 17.0982344 | 1.36608866 | 214.004866 |
| cg06361057 | 0.01520278 | 70.6540869 | 2.27065402 | 2198.48553 | cg03656968 | 0.02767546 | 6.95202234 | 1.23740808 | 39.0579433 |
| cg13050390 | 0.01520521 | 7.25206221 | 1.46457487 | 35.9096742 | cg22665276 | 0.02767655 | 91.885305  | 1.64311026 | 5138.3705  |
| cg13303069 | 0.01520735 | 5.76381281 | 1.40116108 | 23.7100063 | cg13216025 | 0.0277132  | 17343807.8 | 6.21896058 | 4.8369E+13 |
| cg20976433 | 0.01520779 | 1.9274E+11 | 148.963911 | 2.49E+20   | cg00661320 | 0.0277139  | 14.6483498 | 1.34219417 | 159.868191 |
| cg10626541 | 0.01520885 | 1.0054E+12 | 204.699649 | 4.94E+21   | cg03403116 | 0.02771553 | 620690.905 | 4.31586933 | 8.9265E+10 |
| cg13440296 | 0.01521064 | 109175245  | 35.291641  | 3.3774E+14 | cg00479347 | 0.02772628 | 2079.50494 | 2.30962432 | 1872313.51 |
| cg20116935 | 0.015212   | 22.3497469 | 1.81876401 | 274.643209 | cg19605920 | 0.02772881 | 11961.4629 | 2.7972723  | 51148611.9 |
| cg12898849 | 0.01521416 | 2.66E+12   | 246.579387 | 2.87E+22   | cg07286413 | 0.02773538 | 1.9543E+10 | 13.3975442 | 2.85E+19   |
| cg09308608 | 0.01521506 | 1726045687 | 60.005616  | 4.9649E+16 | cg10553515 | 0.02773865 | 37317791   | 6.74687323 | 2.0641E+14 |
| cg16674492 | 0.01523164 | 3.49168864 | 1.27193932 | 9.58527608 | cg21084516 | 0.0277508  | 14.514938  | 1.34009205 | 157.215636 |
| cg00501272 | 0.01523182 | 5.16753844 | 1.37156657 | 19.4693091 | cg20650138 | 0.02779262 | 23.0082767 | 1.40832361 | 375.894284 |
| cg01913455 | 0.01523696 | 16.3726876 | 1.71204438 | 156.575906 | cg22871962 | 0.0277974  | 60684075.8 | 7.07313769 | 5.2064E+14 |
| cg04014328 | 0.01524561 | 7.06425293 | 1.45628061 | 34.2678939 | cg16451324 | 0.02781397 | 16.9603785 | 1.36172913 | 211.24204  |
| cg14870223 | 0.0152465  | 10.7674299 | 1.57917745 | 73.4164153 | cg01306563 | 0.02781894 | 43.7994593 | 1.51002212 | 1270.44008 |
| cg04202511 | 0.01524767 | 7.43570012 | 1.47065149 | 37.5953356 | cg03616164 | 0.02781947 | 1981206.14 | 4.8594692  | 8.0774E+11 |
| cg00034101 | 0.01525382 | 17.7290713 | 1.73778662 | 180.873743 | cg05666074 | 0.02782043 | 1.3846E+11 | 16.3960173 | 1.17E+21   |
| cg26405020 | 0.01525819 | 12.5433067 | 1.62583262 | 96.7716731 | cg05928362 | 0.02782429 | 8.38720056 | 1.26090299 | 55.789489  |
| cg02595219 | 0.01525884 | 7.52996168 | 1.47395408 | 38.4681744 | cg11214576 | 0.02782718 | 36.9957181 | 1.48222869 | 923.395401 |
| cg05471775 | 0.01526372 | 1.54E-06   | 3.12E-11   | 0.0764691  | cg13415434 | 0.02784308 | 12705.3086 | 2.79851363 | 57682358.9 |
| cg17799946 | 0.01526446 | 6.71541244 | 1.44176011 | 31.2789652 | cg05208572 | 0.02784338 | 21.2796883 | 1.39512853 | 324.575925 |
| cg24189904 | 0.01527295 | 6.2491878  | 1.4217921  | 27.4669892 | cg04692420 | 0.02785354 | 1255.6516  | 2.17412465 | 725193.446 |
| cg01786994 | 0.01528475 | 8.91355045 | 1.52183088 | 52.2077601 | cg22450798 | 0.0278592  | 175.344523 | 1.75450806 | 17523.8305 |
| cg12602851 | 0.01528809 | 30.5576566 | 1.92768477 | 484.399933 | cg00415665 | 0.02787336 | 70599.9042 | 3.36667741 | 1480494228 |
| cg00984602 | 0.01529672 | 677499.334 | 13.1436599 | 3.4922E+10 | cg10418044 | 0.02787381 | 0.00358278 | 2.37E-05   | 0.54210217 |
| cg12586496 | 0.01529922 | 1975.16451 | 4.28773697 | 909868.043 | cg04444465 | 0.02788394 | 2205.79772 | 2.30854348 | 2107624.85 |
| cg12904795 | 0.01530644 | 6796018301 | 76.852469  | 6.0097E+17 | cg25983070 | 0.02789058 | 62638.114  | 3.31956031 | 1181943678 |

|            |            |            |            |            |            |            |            |            |            |
|------------|------------|------------|------------|------------|------------|------------|------------|------------|------------|
| cg07570677 | 0.01531056 | 84665039.5 | 33.1237218 | 2.1641E+14 | cg01731920 | 0.02794434 | 32.3934788 | 1.4575331  | 719.940747 |
| cg21902772 | 0.01531267 | 12.5894437 | 1.62520508 | 97.5225189 | cg11251349 | 0.02795123 | 4012594461 | 10.9623233 | 1.4688E+18 |
| cg00798281 | 0.01531271 | 14.1611428 | 1.66227873 | 120.640397 | cg20138604 | 0.02795124 | 652071.21  | 4.26184841 | 9.9768E+10 |
| cg12977686 | 0.01532719 | 270844561  | 41.292196  | 1.7765E+15 | cg23574449 | 0.02796248 | 1007.0691  | 2.11345276 | 479872.65  |
| cg22685442 | 0.01533094 | 0.0005082  | 1.10E-06   | 0.23383578 | cg26389053 | 0.02796313 | 65.8475082 | 1.57324568 | 2756.01858 |
| cg18529840 | 0.0153326  | 0.17497734 | 0.04275533 | 0.71609948 | cg14921691 | 0.02796371 | 52.7449381 | 1.53590094 | 1811.33328 |
| cg16559243 | 0.01533565 | 8.54687274 | 1.50830657 | 48.4311578 | cg11078326 | 0.0279717  | 0.12056034 | 0.0182723  | 0.79545516 |
| cg14893163 | 0.0153358  | 12.1358672 | 1.61307543 | 91.3034012 | cg26572233 | 0.02797503 | 0.05695091 | 0.00442174 | 0.73351419 |
| cg19007249 | 0.01533966 | 9.23979432 | 1.53089007 | 55.7674263 | cg22424532 | 0.02797557 | 8.32300518 | 1.25754812 | 55.0853    |
| cg06630413 | 0.01535133 | 0.16574426 | 0.0387524  | 0.70888933 | cg13522186 | 0.02797755 | 1723.84721 | 2.23860733 | 1327454.42 |
| cg20971407 | 0.01535283 | 29.8883838 | 1.91617635 | 466.196906 | cg12223253 | 0.02800041 | 0.00404327 | 2.96E-05   | 0.55146239 |
| cg01447951 | 0.01536187 | 20.8961345 | 1.78890866 | 244.086489 | cg17152135 | 0.02800363 | 1451.35044 | 2.19496882 | 959657.408 |
| cg17463145 | 0.01536207 | 9.79843418 | 1.54757415 | 62.0385862 | cg19351701 | 0.02801556 | 14.8934887 | 1.33840671 | 165.73139  |
| cg25401594 | 0.01536313 | 0.19795992 | 0.05342494 | 0.73351751 | cg03871460 | 0.02802049 | 10.3457258 | 1.2867171  | 83.1838194 |
| cg08252387 | 0.01536501 | 18.9940344 | 1.75640837 | 205.404021 | cg09758869 | 0.02802053 | 22488.9021 | 2.94805136 | 171554242  |
| cg22332276 | 0.01537439 | 23.3210857 | 1.82632069 | 297.797119 | cg01181415 | 0.02802101 | 4.86171075 | 1.1860309  | 19.9288496 |
| cg25357589 | 0.01537566 | 41308.5441 | 7.63404502 | 223524464  | cg14196353 | 0.0280326  | 596843966  | 8.83543918 | 4.0317E+16 |
| cg14483317 | 0.01538033 | 10308469   | 21.9239985 | 4.847E+12  | cg15717808 | 0.02804436 | 61.2910701 | 1.5581194  | 2410.98035 |
| cg23127201 | 0.01538803 | 252871.014 | 10.7821217 | 5930534967 | cg23173307 | 0.02805484 | 10.9051664 | 1.29344543 | 91.9425369 |
| cg06283270 | 0.01538848 | 412.720406 | 3.1618719  | 53872.5599 | cg06468809 | 0.02806621 | 8.496537   | 1.25896873 | 57.3414885 |
| cg09439599 | 0.01539069 | 176674791  | 37.686227  | 8.2826E+14 | cg07196758 | 0.02806729 | 317588906  | 8.22260167 | 1.2267E+16 |
| cg18679410 | 0.01539169 | 8.51867352 | 1.50592527 | 48.1881804 | cg00811132 | 0.02808994 | 9.09255878 | 1.26781194 | 65.2104801 |
| cg02705837 | 0.01540297 | 5.43231334 | 1.3816489  | 21.3585581 | cg17297071 | 0.02809667 | 3.93590238 | 1.15862284 | 13.3704662 |
| cg03723506 | 0.01540721 | 0.0001092  | 6.81E-08   | 0.17512592 | cg18169610 | 0.02809767 | 168.483231 | 1.7347941  | 16363.0941 |
| cg20454158 | 0.01541068 | 80.4649759 | 2.3115092  | 2801.03249 | cg18832407 | 0.02809775 | 9.03012744 | 1.26674972 | 64.3719912 |
| cg27485194 | 0.0154166  | 651051.069 | 12.8795229 | 3.291E+10  | cg09155362 | 0.02809893 | 29.2339988 | 1.43715015 | 594.667638 |
| cg19878627 | 0.01541783 | 11.1281765 | 1.58404205 | 78.1774148 | cg23112423 | 0.02812602 | 0.17346958 | 0.03631376 | 0.82865822 |
| cg06123544 | 0.01541815 | 13.7328828 | 1.64892375 | 114.372827 | cg09919392 | 0.02813903 | 0.08073512 | 0.00853703 | 0.76351615 |
| cg24238564 | 0.01542057 | 4166.67591 | 4.90857082 | 3536913.03 | cg23254528 | 0.02815315 | 48.0101462 | 1.51402588 | 1522.41396 |
| cg10911160 | 0.0154347  | 17.4377438 | 1.72520587 | 176.254275 | cg19966212 | 0.02815594 | 5.24840041 | 1.19434624 | 23.0634182 |

|            |            |            |            |            |            |            |            |            |            |
|------------|------------|------------|------------|------------|------------|------------|------------|------------|------------|
| cg04354805 | 0.01544283 | 37768.8325 | 7.46265915 | 191149653  | cg21095811 | 0.02815935 | 111902.18  | 3.47328656 | 3605259101 |
| cg05975928 | 0.01544334 | 0.17423645 | 0.04236386 | 0.71660946 | cg11733478 | 0.02816131 | 4846733.33 | 5.19936936 | 4.518E+12  |
| cg13662121 | 0.01544551 | 12.9664469 | 1.630046   | 103.143559 | cg03760060 | 0.02817823 | 0.02133334 | 0.00068691 | 0.66254866 |
| cg13386351 | 0.01544659 | 6.77684473 | 1.44031875 | 31.8857368 | cg24294159 | 0.02818016 | 22.125802  | 1.39278049 | 351.491938 |
| cg04759982 | 0.01544659 | 54.4944289 | 2.14330495 | 1385.54375 | cg20001810 | 0.02818961 | 7.47630075 | 1.24000572 | 45.0764638 |
| cg01233487 | 0.01544787 | 0.14655485 | 0.03097543 | 0.6933987  | cg08949408 | 0.0282011  | 5.86743743 | 1.208149   | 28.49551   |
| cg09303936 | 0.0154522  | 12.4638077 | 1.61758849 | 96.03586   | cg11830546 | 0.02820442 | 46014.0481 | 3.14929628 | 672306585  |
| cg00225623 | 0.01545352 | 3.31933287 | 1.25696875 | 8.76550888 | cg15860013 | 0.02823814 | 607159.965 | 4.13829009 | 8.9081E+10 |
| cg22165175 | 0.01545406 | 12.1640856 | 1.61004106 | 91.9013693 | cg22831315 | 0.028239   | 44496.2962 | 3.13145779 | 632267943  |
| cg01860897 | 0.0154556  | 5.3671099  | 1.37750672 | 20.9115994 | cg22960067 | 0.02824395 | 460681593  | 8.38906996 | 2.5298E+16 |
| cg13811713 | 0.01545899 | 65.5017388 | 2.21892314 | 1933.58558 | cg01718071 | 0.02824994 | 526704.712 | 4.07243327 | 6.8121E+10 |
| cg04640314 | 0.01545968 | 109897193  | 34.0730709 | 3.5446E+14 | cg14188840 | 0.02825094 | 22.863823  | 1.39592523 | 374.485961 |
| cg11615303 | 0.01546133 | 79072427.5 | 31.9936358 | 1.9543E+14 | cg03418154 | 0.02825485 | 13577.468  | 2.75674532 | 66871478.9 |
| cg01960885 | 0.01546306 | 9.34348613 | 1.53083702 | 57.028104  | cg19595886 | 0.02826327 | 0.16503489 | 0.03299818 | 0.82539439 |
| cg03071500 | 0.01546589 | 0.07181704 | 0.00851871 | 0.60545428 | cg13152070 | 0.02826594 | 36916.9751 | 3.0647903  | 444683949  |
| cg05547853 | 0.01546821 | 19.2993648 | 1.75754396 | 211.923849 | cg19477674 | 0.02827678 | 37.5253162 | 1.47084142 | 957.376737 |
| cg08193467 | 0.01547517 | 18.0293408 | 1.73462476 | 187.393341 | cg14159026 | 0.02831158 | 3.7828494  | 1.15182736 | 12.4236931 |
| cg17200441 | 0.01547579 | 16.1614146 | 1.69884207 | 153.746676 | cg16857771 | 0.02831706 | 9.5942151  | 1.27144636 | 72.3970483 |
| cg04086834 | 0.01547646 | 7.69649254 | 1.47498794 | 40.1603268 | cg08916340 | 0.0283436  | 1123.58824 | 2.10641322 | 599336.599 |
| cg13692196 | 0.01548916 | 4995012625 | 70.1541574 | 3.5565E+17 | cg06445533 | 0.02834615 | 228310.171 | 3.70033653 | 1.4087E+10 |
| cg12244052 | 0.01548969 | 11.0002803 | 1.57841075 | 76.6632937 | cg08358115 | 0.02835338 | 680711639  | 8.6362466  | 5.3654E+16 |
| cg00994394 | 0.01549182 | 2373.80134 | 4.38958361 | 1283705.54 | cg09159285 | 0.02836569 | 5.05685619 | 1.18731195 | 21.5375533 |
| cg19856705 | 0.01549963 | 9.68895677 | 1.54045973 | 60.9401734 | cg11579905 | 0.02837224 | 30.1652328 | 1.43441625 | 634.363473 |
| cg01287707 | 0.01550536 | 7.58195274 | 1.47010626 | 39.1033009 | cg11331678 | 0.0283848  | 6.1256058  | 1.21143694 | 30.9739989 |
| cg08741214 | 0.01551389 | 154.973113 | 2.60901173 | 9205.27313 | cg09598437 | 0.02839839 | 14.5369979 | 1.32718278 | 159.227734 |
| cg21553700 | 0.01551915 | 4.33662309 | 1.32168426 | 14.2290412 | cg20633478 | 0.02840038 | 0.17860541 | 0.03827299 | 0.8334832  |
| cg02441296 | 0.01552059 | 8023.82368 | 5.52345401 | 11656066.3 | cg01250407 | 0.02840401 | 11.6333589 | 1.29617491 | 104.411093 |
| cg10771262 | 0.01552657 | 11.3528485 | 1.58680186 | 81.2244883 | cg04575016 | 0.02840928 | 211777.003 | 3.65493646 | 1.2271E+10 |
| cg10575841 | 0.01552853 | 89212881.4 | 32.4232568 | 2.4547E+14 | cg07007550 | 0.02841437 | 2916.10263 | 2.32320478 | 3660312.1  |
| cg03374922 | 0.01553562 | 510.492147 | 3.26934818 | 79710.7611 | cg03355690 | 0.02841922 | 7.58810016 | 1.23871061 | 46.4832251 |

|            |            |            |            |            |            |            |            |            |            |
|------------|------------|------------|------------|------------|------------|------------|------------|------------|------------|
| cg12678667 | 0.01553568 | 12.578274  | 1.61772422 | 97.7997204 | cg15269548 | 0.02841982 | 186267.754 | 3.60308937 | 9629424316 |
| cg20997028 | 0.01554089 | 152.256139 | 2.59748693 | 8924.75404 | cg02642822 | 0.02842302 | 6.92952668 | 1.22683683 | 39.1399563 |
| cg04517429 | 0.01554864 | 13.6322835 | 1.64220948 | 113.164097 | cg04273871 | 0.02842972 | 18.7799597 | 1.3629091  | 258.775061 |
| cg14563485 | 0.01555514 | 0.02849008 | 0.00159488 | 0.50893285 | cg18307767 | 0.02844177 | 62715910.7 | 6.64748019 | 5.917E+14  |
| cg08790676 | 0.01555581 | 5.33926738 | 1.37433064 | 20.7430259 | cg09838956 | 0.02844819 | 0.09570023 | 0.01173025 | 0.7807623  |
| cg04397817 | 0.0155573  | 3605.02751 | 4.7329745  | 2745889.15 | cg03911494 | 0.02846674 | 5.8135E+11 | 17.3596708 | 1.95E+22   |
| cg20762044 | 0.01556158 | 57.7640253 | 2.1593339  | 1545.23699 | cg17046776 | 0.02847038 | 9.85168155 | 1.27250425 | 76.2713594 |
| cg25682080 | 0.01556725 | 11.3899485 | 1.58655543 | 81.7689212 | cg23046727 | 0.02848879 | 12.4421748 | 1.30384482 | 118.731702 |
| cg07666840 | 0.01556817 | 45.6563046 | 2.06465409 | 1009.61132 | cg24944820 | 0.02848999 | 11.4606201 | 1.29259638 | 101.613942 |
| cg09024340 | 0.01557287 | 914.641855 | 3.64511978 | 229504.042 | cg05851813 | 0.02851124 | 7037273.39 | 5.24502945 | 9.4419E+12 |
| cg18010762 | 0.01558131 | 18880.7831 | 6.4688124  | 55108101.5 | cg13166888 | 0.02855146 | 9.27965818 | 1.26322436 | 68.1684575 |
| cg21464220 | 0.01558168 | 18.7025045 | 1.74251132 | 200.735382 | cg11955344 | 0.02855833 | 6806424.98 | 5.20490205 | 8.9007E+12 |
| cg23044884 | 0.01558199 | 4.8133039  | 1.34710715 | 17.1982566 | cg07154254 | 0.02858763 | 614.868135 | 1.95855607 | 193031.402 |
| cg08872550 | 0.01558741 | 629.079157 | 3.39281856 | 116640.657 | cg14186963 | 0.02858793 | 13.1440243 | 1.30951096 | 131.931217 |
| cg13375538 | 0.01558897 | 295.360591 | 2.93956698 | 29677.1189 | cg15433343 | 0.02862187 | 262258.465 | 3.68299332 | 1.8675E+10 |
| cg04381393 | 0.01558975 | 0.00032357 | 4.80E-07   | 0.21799501 | cg09677945 | 0.02862409 | 5.87113226 | 1.20313358 | 28.6503465 |
| cg08606356 | 0.0155959  | 367.407505 | 3.06276686 | 44073.9634 | cg14059420 | 0.02862819 | 12.662052  | 1.30365007 | 122.983585 |
| cg10268345 | 0.01559918 | 9.03127034 | 1.51738844 | 53.752778  | cg00700007 | 0.02863972 | 3.83841965 | 1.15074533 | 12.8034109 |
| cg17272843 | 0.01560014 | 15.1851575 | 1.67435796 | 137.717868 | cg05779272 | 0.02864659 | 44.5891706 | 1.48627109 | 1337.70626 |
| cg10857203 | 0.01560278 | 3815.64194 | 4.77023806 | 3052074.8  | cg19770550 | 0.02865504 | 919808.31  | 4.18824366 | 2.0201E+11 |
| cg06086785 | 0.0156037  | 28844.3979 | 6.99748066 | 118899834  | cg16713947 | 0.02866384 | 19.032264  | 1.35953848 | 266.43385  |
| cg15844687 | 0.01560662 | 1.661E+11  | 133.475169 | 2.07E+20   | cg15631337 | 0.02866427 | 133824936  | 7.03398031 | 2.5461E+15 |
| cg23494957 | 0.01561814 | 1659.09027 | 4.07032165 | 676256.267 | cg27665327 | 0.02866823 | 25.3600849 | 1.40072578 | 459.143336 |
| cg08885449 | 0.01562021 | 16527.5363 | 6.28896632 | 43434714.6 | cg01993865 | 0.02867205 | 2.5638E+13 | 24.9635218 | 2.63E+25   |
| cg09912793 | 0.01562722 | 9.80821109 | 1.54053196 | 62.4466142 | cg22168205 | 0.02867244 | 11.1618784 | 1.2858188  | 96.8935355 |
| cg09179916 | 0.01564036 | 15.29476   | 1.67520492 | 139.642429 | cg04745805 | 0.02868306 | 7.572177   | 1.23471571 | 46.4381105 |
| cg14054928 | 0.01564608 | 6.21257693 | 1.41260167 | 27.3227145 | cg15140562 | 0.02868513 | 1179.02044 | 2.08857304 | 665568.866 |
| cg14109663 | 0.0156592  | 1458.68822 | 3.96305025 | 536902.433 | cg00174845 | 0.02869309 | 0.17812054 | 0.03796825 | 0.83561726 |
| cg19824362 | 0.01566059 | 1269522440 | 52.5540682 | 3.0667E+16 | cg23433889 | 0.028695   | 8.53664484 | 1.25004885 | 58.297166  |
| cg02909446 | 0.01567108 | 6.16441377 | 1.41002395 | 26.9498948 | cg04401646 | 0.02871228 | 45942.0324 | 3.05339637 | 691253307  |



|            |            |            |            |            |            |            |            |            |            |
|------------|------------|------------|------------|------------|------------|------------|------------|------------|------------|
| cg00521598 | 0.01567129 | 255521.202 | 10.5090454 | 6212846401 | cg27111463 | 0.02871241 | 10.2433599 | 1.27369807 | 82.3793529 |
| cg15954782 | 0.01567324 | 151766227  | 35.1116426 | 6.5599E+14 | cg13932603 | 0.02872987 | 5631.13412 | 2.45257314 | 12929144.1 |
| cg26382173 | 0.01567359 | 8.62768867 | 1.50241895 | 49.5447771 | cg16884841 | 0.02873142 | 28.2951119 | 1.41512559 | 565.754279 |
| cg23275158 | 0.01567539 | 35.106158  | 1.95840318 | 629.309809 | cg26227186 | 0.02873487 | 30.2815654 | 1.42504029 | 643.471776 |
| cg00957901 | 0.01567674 | 6.36143405 | 1.41831373 | 28.5323637 | cg10859966 | 0.02873765 | 51815.4465 | 3.08705627 | 869708959  |
| cg19675664 | 0.015679   | 18.6546596 | 1.73779643 | 200.251491 | cg05709162 | 0.02874291 | 14.2092477 | 1.31718811 | 153.283132 |
| cg08325845 | 0.01568045 | 5.80743917 | 1.39404352 | 24.1931828 | cg12628956 | 0.02876657 | 21988.4989 | 2.81957905 | 171477400  |
| cg04006061 | 0.01568302 | 7.34645283 | 1.45726627 | 37.0353519 | cg27625456 | 0.02876895 | 10.501629  | 1.27604755 | 86.4264124 |
| cg14886269 | 0.01568522 | 391.839757 | 3.08748339 | 49729.3024 | cg26960176 | 0.02878231 | 176613164  | 7.14982995 | 4.3627E+15 |
| cg24494316 | 0.01569625 | 786.856754 | 3.51985686 | 175900.207 | cg00897115 | 0.0287902  | 31.7880915 | 1.43070685 | 706.282182 |
| cg20818283 | 0.0156968  | 414129.978 | 11.4832432 | 1.4935E+10 | cg04329454 | 0.02879623 | 12.9216667 | 1.30326553 | 128.116233 |
| cg20278503 | 0.01569682 | 42.7824843 | 2.03166361 | 900.907491 | cg17504394 | 0.0288014  | 3.71488733 | 1.14545677 | 12.0479342 |
| cg21404224 | 0.01569836 | 4.65E-12   | 2.97E-21   | 0.0072678  | cg26127778 | 0.02880355 | 6.7249026  | 1.21797971 | 37.1305981 |
| cg05247640 | 0.01570086 | 0.00019653 | 1.93E-07   | 0.19980837 | cg27093637 | 0.02880664 | 0.15100281 | 0.02772718 | 0.82236461 |
| cg00319168 | 0.01570741 | 8.23507535 | 1.48843142 | 45.5623719 | cg23084986 | 0.02880893 | 27.4473187 | 1.40863064 | 534.813941 |
| cg05178734 | 0.01570757 | 12.6400718 | 1.61372452 | 99.0078617 | cg09778958 | 0.02882141 | 3335.98821 | 2.31309033 | 4811233.36 |
| cg25143652 | 0.01571774 | 29.6171974 | 1.89439026 | 463.039956 | cg07112260 | 0.02885167 | 44.7779156 | 1.48043379 | 1354.37447 |
| cg17655624 | 0.0157199  | 19.9216048 | 1.75782016 | 225.774142 | cg06618097 | 0.02885927 | 16.9781049 | 1.3392808  | 215.231971 |
| cg12938320 | 0.01572274 | 6.76519473 | 1.43391217 | 31.9181752 | cg26841114 | 0.02886276 | 32.4075994 | 1.43154239 | 733.650995 |
| cg00777652 | 0.01572409 | 281555.228 | 10.6483475 | 7444661887 | cg03562744 | 0.02886985 | 9442.02223 | 2.5693312  | 34698439.8 |
| cg04828587 | 0.01572478 | 197.957244 | 2.70961705 | 14462.2172 | cg02882968 | 0.028877   | 0.07416991 | 0.00719262 | 0.76483603 |
| cg01904183 | 0.01572707 | 25.2236359 | 1.83746215 | 346.255734 | cg25850845 | 0.02888139 | 10.6732434 | 1.2762875  | 89.2574168 |
| cg19403104 | 0.01573348 | 3.97745692 | 1.29713791 | 12.1962078 | cg24591969 | 0.0288928  | 0.17818495 | 0.03792095 | 0.83726472 |
| cg05725263 | 0.0157336  | 15.9950637 | 1.68605185 | 151.740329 | cg17071957 | 0.02889692 | 13.0634446 | 1.30284822 | 130.985008 |
| cg21328770 | 0.01573641 | 434487.326 | 11.5414186 | 1.6357E+10 | cg01507044 | 0.02891781 | 2881.24925 | 2.26853717 | 3659449.53 |
| cg04152610 | 0.01574019 | 21.2255983 | 1.77810122 | 253.374789 | cg17471836 | 0.02891887 | 8.20866085 | 1.24167649 | 54.2670443 |
| cg25119415 | 0.01574191 | 0.17076864 | 0.04068239 | 0.71681944 | cg27398547 | 0.02895916 | 13.7658228 | 1.30869559 | 144.799049 |
| cg05789837 | 0.01574537 | 335.407175 | 2.98999626 | 37624.7871 | cg08410301 | 0.02895946 | 46517853.5 | 6.11883243 | 3.5365E+14 |
| cg24913115 | 0.01574844 | 1.4556E+12 | 195.218364 | 1.09E+22   | cg05662500 | 0.02896182 | 1004.95814 | 2.032213   | 496966.048 |
| cg18429434 | 0.01575091 | 12589416.1 | 21.7230669 | 7.2961E+12 | cg13686012 | 0.02896287 | 54.0158714 | 1.50562567 | 1937.87502 |

|            |            |            |            |            |
|------------|------------|------------|------------|------------|
| cg23656386 | 0.01575206 | 28.3453175 | 1.87709934 | 428.031167 |
| cg01396817 | 0.01575239 | 118657.368 | 9.02452713 | 1560145013 |
| cg01217876 | 0.0157532  | 53.7101484 | 2.11707551 | 1362.62501 |
| cg16663533 | 0.01575521 | 23823296.3 | 24.4812039 | 2.3183E+13 |
| cg02803139 | 0.01575566 | 34.3610793 | 1.9461776  | 606.668049 |
| cg23302730 | 0.01575787 | 4.84781627 | 1.3460162  | 17.4599106 |
| cg14240353 | 0.01576687 | 8.26278144 | 1.48792091 | 45.8852056 |
| cg00761126 | 0.0157675  | 48.1533437 | 2.07309529 | 1118.49393 |
| cg22381196 | 0.01577159 | 0.12191977 | 0.02208474 | 0.67306332 |
| cg18160072 | 0.01577277 | 11.415699  | 1.58105368 | 82.4248945 |
| cg20705565 | 0.01577856 | 251805790  | 38.0280224 | 1.6674E+15 |
| cg10196720 | 0.01578275 | 4.07070518 | 1.30211433 | 12.7259491 |
| cg05228295 | 0.01579075 | 32381220.1 | 25.8138842 | 4.0619E+13 |
| cg00564831 | 0.01579189 | 251.706925 | 2.82696807 | 22411.4226 |
| cg21942490 | 0.0158117  | 13.7007419 | 1.63497333 | 114.809413 |
| cg03881924 | 0.01581398 | 118254.326 | 8.96849986 | 1559244682 |
| cg03509901 | 0.0158171  | 510.757751 | 3.22523319 | 80885.153  |
| cg01614478 | 0.01582126 | 8503.15933 | 5.46749119 | 13224295.4 |
| cg21282452 | 0.01582345 | 18.4543115 | 1.72858743 | 197.017291 |
| cg22213149 | 0.01583307 | 2457.62269 | 4.3277977  | 1395608.05 |
| cg20650138 | 0.01584184 | 19.1078284 | 1.73918627 | 209.930997 |
| cg03131236 | 0.01584645 | 0.00134127 | 6.22E-06   | 0.28923125 |
| cg26150582 | 0.01584804 | 0.12868098 | 0.02432398 | 0.68076005 |
| cg26097051 | 0.01584895 | 6.62131306 | 1.42546978 | 30.7560268 |
| cg14780632 | 0.01585621 | 3.78975318 | 1.28374522 | 11.1877567 |
| cg05421550 | 0.0158581  | 433.424165 | 3.12128844 | 60185.5644 |
| cg21318213 | 0.01586842 | 0.03553297 | 0.00235969 | 0.53506586 |
| cg03840075 | 0.01587623 | 0.0626596  | 0.00659677 | 0.59517384 |
| cg06305609 | 0.01588135 | 9.06052609 | 1.51099251 | 54.3306021 |
| cg20706778 | 0.01588278 | 6.28010518 | 1.41071704 | 27.957216  |

|            |            |            |            |            |
|------------|------------|------------|------------|------------|
| cg17188384 | 0.02896617 | 10.6049068 | 1.27401513 | 88.2752851 |
| cg20585530 | 0.02897435 | 6.28098166 | 1.20728035 | 32.6773568 |
| cg20922251 | 0.02897501 | 12192.755  | 2.62339193 | 56668343.2 |
| cg00283344 | 0.0289778  | 0.00629346 | 6.66E-05   | 0.59484009 |
| cg17106536 | 0.02898013 | 3908267.68 | 4.73751403 | 3.2242E+12 |
| cg02311432 | 0.02900192 | 21.0937985 | 1.3662775  | 325.664687 |
| cg16013543 | 0.02900265 | 11.5095878 | 1.28411678 | 103.160875 |
| cg23511157 | 0.02902288 | 13.3500943 | 1.30338118 | 136.740518 |
| cg25246158 | 0.02902519 | 901.232478 | 2.00479263 | 405139.148 |
| cg00334820 | 0.02903289 | 2.2323E+12 | 18.2753928 | 2.73E+23   |
| cg06422678 | 0.02903934 | 6.29946495 | 1.20683726 | 32.8820296 |
| cg09963640 | 0.0290535  | 14.4297797 | 1.31318665 | 158.559747 |
| cg13873511 | 0.02906118 | 24981.1688 | 2.80982274 | 222098990  |
| cg12849291 | 0.0290645  | 1422101.22 | 4.24283576 | 4.7666E+11 |
| cg09337254 | 0.02906608 | 35.1327683 | 1.43768403 | 858.541504 |
| cg09728459 | 0.02907028 | 95984917.5 | 6.51630339 | 1.4139E+15 |
| cg16629179 | 0.02907163 | 15.574892  | 1.32309486 | 183.340793 |
| cg15042692 | 0.02907556 | 22515037.7 | 5.61780461 | 9.0236E+13 |
| cg11204680 | 0.02909806 | 0.02092421 | 0.00064907 | 0.67453599 |
| cg04556868 | 0.029113   | 50.0037551 | 1.48886133 | 1679.38778 |
| cg02425595 | 0.02912975 | 171.203362 | 1.68665392 | 17377.9522 |
| cg23343073 | 0.02914587 | 115.352111 | 1.61960786 | 8215.63655 |
| cg12006072 | 0.02916552 | 10.6408618 | 1.27110842 | 89.0781128 |
| cg06277849 | 0.02916996 | 30.777594  | 1.41559329 | 669.161333 |
| cg20277282 | 0.02917587 | 5.43271375 | 1.18719495 | 24.8605999 |
| cg08826738 | 0.02919427 | 37.3378829 | 1.44290033 | 966.191126 |
| cg10481400 | 0.02919477 | 1362189181 | 8.41671284 | 2.2046E+17 |
| cg21649520 | 0.02921732 | 35.9244058 | 1.43661063 | 898.338703 |
| cg07254054 | 0.02921968 | 12.4415426 | 1.29044702 | 119.952217 |
| cg16119852 | 0.02924445 | 29509.6174 | 2.82809898 | 307916209  |

|            |            |            |            |            |            |            |            |            |            |
|------------|------------|------------|------------|------------|------------|------------|------------|------------|------------|
| cg01993576 | 0.01588293 | 12.6237647 | 1.60777343 | 99.1180933 | cg19601328 | 0.02924826 | 13.2074719 | 1.29773536 | 134.416707 |
| cg27180671 | 0.01588442 | 5.64274162 | 1.38269515 | 23.0278764 | cg26438284 | 0.02925034 | 95.3273829 | 1.58434098 | 5735.70338 |
| cg03051983 | 0.01588701 | 60.2483115 | 2.15418205 | 1685.02891 | cg16509443 | 0.02925854 | 114164.152 | 3.23926175 | 4023587645 |
| cg01633093 | 0.01588933 | 9.75076046 | 1.53169713 | 62.0731917 | cg03520966 | 0.02925918 | 1589.42536 | 2.1041819  | 1200596.28 |
| cg21204356 | 0.01589319 | 458916617  | 41.8250265 | 5.0354E+15 | cg17802464 | 0.02926574 | 11.8301569 | 1.2830742  | 109.076008 |
| cg26781150 | 0.01589444 | 54.6318589 | 2.11458379 | 1411.45507 | cg11904590 | 0.02927771 | 16251.1551 | 2.65795085 | 99362275   |
| cg25785679 | 0.01589695 | 333010234  | 39.3655465 | 2.8171E+15 | cg14340070 | 0.02927863 | 124.038795 | 1.62579036 | 9463.47269 |
| cg02786912 | 0.01589715 | 6.41107514 | 1.41588828 | 29.029045  | cg08539350 | 0.0292793  | 245.672562 | 1.74171779 | 34652.5759 |
| cg24335302 | 0.01590029 | 271470449  | 37.8695622 | 1.9461E+15 | cg20053110 | 0.02929089 | 4.80113296 | 1.17123495 | 19.6808315 |
| cg27087622 | 0.01590209 | 7.16842142 | 1.44568088 | 35.5446809 | cg19637634 | 0.02929234 | 306.799834 | 1.78043341 | 52866.9806 |
| cg09904140 | 0.01590502 | 18.6958277 | 1.72961035 | 202.088276 | cg07408835 | 0.02929631 | 0.02797694 | 0.00112211 | 0.69753346 |
| cg10884788 | 0.01590577 | 8.19711349 | 1.48232746 | 45.3291673 | cg13430298 | 0.02929723 | 10504772.4 | 5.09499099 | 2.1659E+13 |
| cg13897296 | 0.01590591 | 37378581   | 26.1104626 | 5.351E+13  | cg02491878 | 0.02929739 | 19.1388811 | 1.34618348 | 272.100183 |
| cg01834022 | 0.01590848 | 4.10281435 | 1.3022476  | 12.926179  | cg13982823 | 0.02931195 | 8469.96155 | 2.48465601 | 28873312.2 |
| cg13524209 | 0.01591197 | 23.2857573 | 1.80183234 | 300.930604 | cg12091786 | 0.02933881 | 8.15970257 | 1.23482819 | 53.9190366 |
| cg13074532 | 0.01591917 | 5.74309099 | 1.38661555 | 23.786762  | cg01024069 | 0.02934546 | 14061.0574 | 2.61003536 | 75751209.6 |
| cg21400015 | 0.01592701 | 13.3357915 | 1.62294639 | 109.580535 | cg20207890 | 0.02934581 | 50.13584   | 1.48172516 | 1696.40263 |
| cg18254850 | 0.01592933 | 59.0486447 | 2.14322332 | 1626.86847 | cg16802592 | 0.02935472 | 5.91089911 | 1.19527771 | 29.2306364 |
| cg27625401 | 0.01593448 | 30.6346404 | 1.89556097 | 495.094174 | cg25512381 | 0.02936262 | 33.7882147 | 1.42367438 | 801.899276 |
| cg01083650 | 0.01594067 | 35837863.5 | 25.7849016 | 4.981E+13  | cg18032014 | 0.02936763 | 6.65190104 | 1.20937011 | 36.5874656 |
| cg17297071 | 0.01594451 | 3.90936844 | 1.29004471 | 11.8470014 | cg25984973 | 0.02937033 | 150.782229 | 1.65387585 | 13746.6671 |
| cg19697239 | 0.01596458 | 8.84556819 | 1.50210598 | 52.0895846 | cg13567541 | 0.02937072 | 6.34837935 | 1.20367882 | 33.4822874 |
| cg18257541 | 0.01596545 | 42.2046217 | 2.01072475 | 885.864709 | cg12397426 | 0.02938578 | 7.8913638  | 1.2300232  | 50.6280066 |
| cg07530530 | 0.01596629 | 122380.861 | 8.90273795 | 1682299886 | cg10929210 | 0.02938743 | 11.9562831 | 1.28229425 | 111.481982 |
| cg02774334 | 0.01596762 | 8.05425733 | 1.47598826 | 43.950933  | cg17878425 | 0.02940393 | 678.043817 | 1.92072732 | 239359.024 |
| cg25298754 | 0.01596947 | 19.8417502 | 1.74637079 | 225.436119 | cg17055959 | 0.0294097  | 47738.0406 | 2.93966807 | 775230561  |
| cg14019186 | 0.01597068 | 4.09274383 | 1.30076846 | 12.8774279 | cg03100449 | 0.0294111  | 33.6694074 | 1.42182493 | 797.305608 |
| cg16098170 | 0.01597387 | 159.32937  | 2.57565235 | 9856.08489 | cg00484396 | 0.02942783 | 27.2793291 | 1.39176308 | 534.689997 |
| cg16007619 | 0.01599642 | 10.8598742 | 1.55982571 | 75.609004  | cg10911160 | 0.02943711 | 20.9255235 | 1.35513654 | 323.124292 |
| cg21741562 | 0.01599691 | 4.93967669 | 1.3467955  | 18.11738   | cg21212076 | 0.02943807 | 17.6068586 | 1.33193112 | 232.745873 |

|            |            |            |            |            |            |            |            |            |            |
|------------|------------|------------|------------|------------|------------|------------|------------|------------|------------|
| cg02060584 | 0.01601243 | 5.10089208 | 1.35461795 | 19.2077036 | cg21938523 | 0.02944315 | 1344155.13 | 4.09493579 | 4.4122E+11 |
| cg11235663 | 0.01602744 | 9.56542359 | 1.52253536 | 60.0953719 | cg22837289 | 0.02944445 | 2253670.05 | 4.3114354  | 1.178E+12  |
| cg24324441 | 0.01603783 | 18.803241  | 1.72626964 | 204.812657 | cg22381196 | 0.02945279 | 0.1190258  | 0.01752179 | 0.80854409 |
| cg12467096 | 0.01604984 | 43399320.1 | 26.3313983 | 7.1531E+13 | cg23772500 | 0.02945456 | 6.2062E+10 | 11.9549234 | 3.22E+20   |
| cg11517045 | 0.01605356 | 523.906982 | 3.20382401 | 85672.1608 | cg05342320 | 0.0294649  | 8.5013E+17 | 61.5229273 | 1.17E+34   |
| cg06623120 | 0.01605671 | 1762.54796 | 4.01392425 | 773949.664 | cg03719380 | 0.02950055 | 102.002749 | 1.58498839 | 6564.43974 |
| cg15227217 | 0.01606418 | 30672.5568 | 6.82312457 | 137884884  | cg00145141 | 0.02950282 | 9.28003711 | 1.24836197 | 68.9856717 |
| cg17365504 | 0.0160682  | 1.1233E+14 | 408.531919 | 3.09E+25   | cg17507671 | 0.02950752 | 9.64453313 | 1.25308613 | 74.2303478 |
| cg09486260 | 0.01607123 | 3073950.21 | 16.0531985 | 5.8862E+11 | cg13415207 | 0.02951141 | 6.95E-08   | 2.49E-14   | 0.19391789 |
| cg22544144 | 0.01607342 | 600211498  | 42.7622739 | 8.4246E+15 | cg16823292 | 0.02951313 | 0.17982292 | 0.03835693 | 0.84303624 |
| cg03519879 | 0.01607528 | 50.5330004 | 2.07257335 | 1232.08384 | cg08360738 | 0.02951321 | 0.01101661 | 0.00019008 | 0.63849298 |
| cg19359627 | 0.01607699 | 37.3893832 | 1.95966912 | 713.368374 | cg13959647 | 0.02951757 | 14.3355769 | 1.30332203 | 157.680727 |
| cg18372896 | 0.01607704 | 5.44348867 | 1.3699662  | 21.6294159 | cg19280776 | 0.02951798 | 38.1010986 | 1.436428   | 1010.62755 |
| cg04559178 | 0.01607853 | 17.2578617 | 1.69742622 | 175.461994 | cg02851730 | 0.0295223  | 3375.27849 | 2.24356709 | 5077853.45 |
| cg20470734 | 0.01609077 | 0.17993379 | 0.04451748 | 0.7272686  | cg08432727 | 0.02952772 | 6.66212143 | 1.20752151 | 36.7561669 |
| cg07665387 | 0.01609168 | 6.64268387 | 1.42128421 | 31.0460419 | cg13327503 | 0.02952978 | 15.3909505 | 1.31232289 | 180.505392 |
| cg22940789 | 0.01609194 | 145.728905 | 2.52168997 | 8421.69895 | cg14397459 | 0.02954895 | 1.0943E+11 | 12.4843278 | 9.59E+20   |
| cg01917164 | 0.01609844 | 2545.54007 | 4.28706036 | 1511472.6  | cg26164735 | 0.02956142 | 209491047  | 6.69656437 | 6.5536E+15 |
| cg02105002 | 0.01610091 | 44.7138461 | 2.02447985 | 987.576161 | cg14266050 | 0.02956713 | 447.261223 | 1.83221672 | 109180.644 |
| cg26188299 | 0.01610297 | 4218.83507 | 4.70716593 | 3781164.64 | cg14159304 | 0.029568   | 16.7311741 | 1.32247352 | 211.673188 |
| cg04385193 | 0.01610355 | 5817727.56 | 18.0038571 | 1.8799E+12 | cg15107861 | 0.02957306 | 23.2230327 | 1.36607826 | 394.786494 |
| cg08141873 | 0.01610514 | 27.9580013 | 1.85531208 | 421.303696 | cg00003202 | 0.02957514 | 4.951E+14  | 28.6609779 | 8.55E+27   |
| cg08623154 | 0.01610649 | 7.5689E+11 | 160.021129 | 3.58E+21   | cg14798020 | 0.02959112 | 0.09141579 | 0.01059223 | 0.78896018 |
| cg22838882 | 0.01610846 | 9.96305482 | 1.53192881 | 64.7957404 | cg03784679 | 0.02961281 | 2130850434 | 8.37876259 | 5.4191E+17 |
| cg09295382 | 0.01611655 | 19596.3938 | 6.25302505 | 61413259.8 | cg04520793 | 0.0296138  | 332.379672 | 1.77637373 | 62192.0065 |
| cg24527881 | 0.01611957 | 50.8851607 | 2.07247848 | 1249.37344 | cg26121931 | 0.02961827 | 3.32223689 | 1.12612472 | 9.80109731 |
| cg03109066 | 0.0161213  | 2.7444E+12 | 202.565456 | 3.72E+22   | cg12619165 | 0.02962241 | 0.22232188 | 0.05735275 | 0.86180734 |
| cg23864823 | 0.0161243  | 32075953   | 24.6468031 | 4.1744E+13 | cg04522003 | 0.02962654 | 21.3832132 | 1.35371358 | 337.768501 |
| cg03945021 | 0.01612556 | 10.1763014 | 1.53749189 | 67.3545726 | cg20239584 | 0.02964599 | 706.379542 | 1.91172849 | 261005.713 |
| cg00311035 | 0.0161276  | 12.0092946 | 1.58537397 | 90.9710641 | cg19048426 | 0.02964748 | 149942.286 | 3.24512916 | 6928133807 |

|            |            |            |            |            |            |            |            |            |            |
|------------|------------|------------|------------|------------|------------|------------|------------|------------|------------|
| cg16101252 | 0.0161281  | 228412.796 | 9.84991896 | 5296734483 | cg08790487 | 0.02966702 | 312.855852 | 1.76278167 | 55525.1883 |
| cg20601684 | 0.01613575 | 3566.0036  | 4.55320315 | 2792843.03 | cg08404201 | 0.02967471 | 1.9241E+10 | 10.3332832 | 3.5829E+19 |
| cg23008153 | 0.01613862 | 15.9942573 | 1.67147984 | 153.047773 | cg07237214 | 0.02970543 | 27.5684005 | 1.38614905 | 548.29364  |
| cg21187108 | 0.01614552 | 70.9228566 | 2.20223099 | 2284.07085 | cg26822986 | 0.02974051 | 6.40976429 | 1.20026781 | 34.2299259 |
| cg02091066 | 0.01614583 | 7.69064646 | 1.45923353 | 40.532267  | cg05375405 | 0.02974162 | 2152360.29 | 4.19002627 | 1.1056E+12 |
| cg02839622 | 0.01615053 | 74.2027073 | 2.22038464 | 2479.76934 | cg27195224 | 0.02975565 | 0.14093037 | 0.02407435 | 0.82500116 |
| cg09519400 | 0.01615792 | 474.802105 | 3.13023182 | 72019.2789 | cg23149053 | 0.02976856 | 20.4633305 | 1.3446529  | 311.417091 |
| cg21163429 | 0.01615867 | 6.55420465 | 1.41638118 | 30.3291226 | cg26906273 | 0.02978405 | 8.65832013 | 1.23561904 | 60.671214  |
| cg05843387 | 0.01616037 | 2858163.72 | 15.67733   | 5.2108E+11 | cg24265806 | 0.02978784 | 3489195.16 | 4.3768611  | 2.7816E+12 |
| cg17516247 | 0.01616571 | 11.7717398 | 1.57837564 | 87.7952337 | cg09456081 | 0.02979991 | 1.2553E+16 | 37.7178556 | 4.18E+30   |
| cg16745793 | 0.01616917 | 0.03406455 | 0.00216887 | 0.5350215  | cg14663177 | 0.02980835 | 7.69461994 | 1.22107629 | 48.4876962 |
| cg09755397 | 0.0161735  | 32.2483732 | 1.90165441 | 546.86991  | cg12738347 | 0.02981281 | 5.9163598  | 1.19001426 | 29.4141964 |
| cg07509646 | 0.01617666 | 3.6856E+10 | 90.1473261 | 1.5068E+19 | cg21211321 | 0.02981565 | 0.2049157  | 0.0490352  | 0.85633262 |
| cg14413354 | 0.01618083 | 17.4050117 | 1.69629956 | 178.585458 | cg03330710 | 0.02983074 | 21.856134  | 1.35193674 | 353.337979 |
| cg02740658 | 0.01618719 | 622209.217 | 11.7894245 | 3.2838E+10 | cg23176538 | 0.02983487 | 6468.48029 | 2.35752632 | 17747940.6 |
| cg22637507 | 0.01618964 | 24.2723467 | 1.80354703 | 326.660079 | cg09651522 | 0.02986007 | 10.3303919 | 1.25596044 | 84.9684383 |
| cg07569020 | 0.01619262 | 17.3584499 | 1.6950226  | 177.765053 | cg06909469 | 0.02987254 | 8.42899886 | 1.23109203 | 57.7113814 |
| cg16364495 | 0.01619802 | 6.74904616 | 1.42326558 | 32.0036013 | cg20885078 | 0.02987461 | 24.1187293 | 1.36396947 | 426.485426 |
| cg16579893 | 0.01620439 | 20.2584252 | 1.74366522 | 235.368457 | cg04789663 | 0.02990642 | 12.9796421 | 1.28341862 | 131.267465 |
| cg06892005 | 0.0162154  | 9994916415 | 70.329262  | 1.4204E+18 | cg00229387 | 0.02991289 | 102.755704 | 1.56950818 | 6727.4162  |
| cg23953820 | 0.01621598 | 65.228794  | 2.16347023 | 1966.65316 | cg06677890 | 0.02991953 | 7.62854474 | 1.21852897 | 47.7581546 |
| cg04604143 | 0.01622106 | 167389756  | 33.0150866 | 8.4868E+14 | cg20346912 | 0.02992034 | 6.27517149 | 1.19558977 | 32.93586   |
| cg18568748 | 0.01622376 | 0.00010155 | 5.63E-08   | 0.18307006 | cg06244417 | 0.02994012 | 0.12733463 | 0.01980862 | 0.81853779 |
| cg11856688 | 0.01622418 | 7.6149E+15 | 856.165901 | 6.77E+28   | cg19818312 | 0.02994041 | 12407.1424 | 2.49876191 | 61605382   |
| cg10424417 | 0.01622439 | 6.67169484 | 1.41969257 | 31.3529231 | cg11832404 | 0.02994183 | 5.2565287  | 1.17493713 | 23.517083  |
| cg02490920 | 0.01622642 | 24.8237922 | 1.8094196  | 340.562609 | cg10983208 | 0.02994615 | 9.34141987 | 1.24236951 | 70.238463  |
| cg17465827 | 0.01622731 | 444.515333 | 3.08226848 | 64106.6417 | cg16117513 | 0.02995452 | 15.7229863 | 1.30664526 | 189.196185 |
| cg01865606 | 0.01622897 | 106626.81  | 8.47645731 | 1341276929 | cg01527459 | 0.02998849 | 4.29919787 | 1.15178112 | 16.0474087 |
| cg03451607 | 0.01624009 | 16.3500011 | 1.67466996 | 159.626996 | cg06824394 | 0.02999172 | 4.45553839 | 1.15574357 | 17.1766669 |
| cg24533564 | 0.01624652 | 13.1289672 | 1.60801858 | 107.193898 | cg22324029 | 0.03000108 | 22.8375664 | 1.3537793  | 385.258097 |

|            |            |            |            |            |            |            |            |            |            |
|------------|------------|------------|------------|------------|------------|------------|------------|------------|------------|
| cg11643442 | 0.01624771 | 8.43331709 | 1.48190267 | 47.9929207 | cg19402405 | 0.03000598 | 267447949  | 6.54213261 | 1.0933E+16 |
| cg02605634 | 0.0162649  | 24.8560214 | 1.80814491 | 341.688211 | cg19169234 | 0.03000828 | 152247.08  | 3.17381882 | 7303243994 |
| cg08535309 | 0.01626796 | 588264.483 | 11.5724564 | 2.9903E+10 | cg12623536 | 0.03001583 | 12.3266882 | 1.2750583  | 119.168858 |
| cg06241689 | 0.01627043 | 16.6277248 | 1.67878962 | 164.690816 | cg09612202 | 0.03004111 | 1560.91379 | 2.03464502 | 1197482.54 |
| cg02588777 | 0.01627523 | 2.4749E+11 | 125.714164 | 4.87E+20   | cg02721176 | 0.03004198 | 0.21080478 | 0.05165027 | 0.86037611 |
| cg00133403 | 0.01627759 | 5.92378086 | 1.38786032 | 25.2843742 | cg08302771 | 0.0300427  | 20.1780721 | 1.33672899 | 304.590234 |
| cg17826834 | 0.01628001 | 0.18324572 | 0.04590233 | 0.73153141 | cg00351047 | 0.03007815 | 21.7043752 | 1.34537138 | 350.148598 |
| cg18634560 | 0.01628197 | 9.26336886 | 1.50691173 | 56.9442793 | cg04517429 | 0.03008382 | 16.1579695 | 1.30752498 | 199.674946 |
| cg04903089 | 0.01628971 | 0.09601057 | 0.01419202 | 0.64952184 | cg21942576 | 0.03009702 | 374.867923 | 1.76951167 | 79415.1075 |
| cg23509869 | 0.01629627 | 67.1858209 | 2.16971295 | 2080.42936 | cg11848563 | 0.03009846 | 15.3809071 | 1.30104366 | 181.832717 |
| cg17556421 | 0.01629935 | 0.13046094 | 0.0247617  | 0.68735402 | cg01784928 | 0.03010183 | 26.4954584 | 1.37090635 | 512.076785 |
| cg02268171 | 0.01631741 | 11.119661  | 1.55746119 | 79.3900114 | cg02152119 | 0.03011604 | 26261.2413 | 2.66133839 | 259137582  |
| cg14473050 | 0.01632083 | 57.2697533 | 2.10525892 | 1557.91984 | cg13576178 | 0.03011996 | 81961.9898 | 2.96853041 | 2262994424 |
| cg19788741 | 0.01633209 | 8.92307735 | 1.49530786 | 53.247436  | cg14593867 | 0.03013162 | 561954.867 | 3.56928014 | 8.8475E+10 |
| cg21774561 | 0.01633416 | 1225.0895  | 3.69522731 | 406157.501 | cg21195414 | 0.03013318 | 586186571  | 6.95961635 | 4.9373E+16 |
| cg25703213 | 0.01633773 | 0.07637357 | 0.00935802 | 0.62330747 | cg02290575 | 0.03013907 | 414.69597  | 1.78431899 | 96380.0469 |
| cg15593337 | 0.01633844 | 11.6513538 | 1.57028167 | 86.4520347 | cg20955894 | 0.03015595 | 8.17716503 | 1.22344601 | 54.6538445 |
| cg16635010 | 0.01634474 | 155.762595 | 2.52827094 | 9596.27609 | cg09871837 | 0.03015878 | 16.9770761 | 1.31224221 | 219.640179 |
| cg04134731 | 0.01635058 | 3430.24996 | 4.46058806 | 2637906.62 | cg23378144 | 0.03017409 | 454.857697 | 1.79812086 | 115062.079 |
| cg21143446 | 0.01635194 | 14.93      | 1.6430353  | 135.666531 | cg27090191 | 0.03018164 | 8872065.93 | 4.63278167 | 1.6991E+13 |
| cg06784539 | 0.0163525  | 13.112617  | 1.60430996 | 107.174255 | cg17146950 | 0.03018314 | 75.9284926 | 1.51421343 | 3807.34702 |
| cg14470398 | 0.01635356 | 11.5409793 | 1.56709634 | 84.9942658 | cg01506678 | 0.03019081 | 0.0641675  | 0.00535633 | 0.7687104  |
| cg05533953 | 0.01635714 | 5078.97689 | 4.79199568 | 5383144.73 | cg04750166 | 0.03019418 | 2.8969E+12 | 15.6096291 | 5.38E+23   |
| cg13382703 | 0.01635959 | 87728.8295 | 8.08444445 | 951994608  | cg13677149 | 0.03021123 | 6.75947814 | 1.20059782 | 38.0564947 |
| cg23345004 | 0.01636461 | 6.74083783 | 1.41949942 | 32.0105061 | cg15593510 | 0.03021299 | 0.17163513 | 0.03486824 | 0.84485537 |
| cg06459921 | 0.01636523 | 7.56E-07   | 7.60E-12   | 0.07520797 | cg03723506 | 0.03022521 | 6.76E-05   | 1.14E-08   | 0.39934431 |
| cg19712821 | 0.01636676 | 12.337555  | 1.58602429 | 95.9728453 | cg15447669 | 0.03022638 | 2180996.95 | 4.03544687 | 1.1787E+12 |
| cg26251270 | 0.01636686 | 22.2433605 | 1.76724144 | 279.965756 | cg23239150 | 0.03022958 | 0.05720321 | 0.00430124 | 0.76075983 |
| cg09487931 | 0.01637797 | 248977.831 | 9.77414066 | 6342241464 | cg03918756 | 0.03023559 | 0.20480318 | 0.04880516 | 0.8594243  |
| cg19136717 | 0.01638246 | 13555.3868 | 5.7281183  | 32078337.3 | cg07641943 | 0.03023696 | 793551.646 | 3.66082984 | 1.7202E+11 |

|            |            |            |            |            |            |            |            |            |            |
|------------|------------|------------|------------|------------|------------|------------|------------|------------|------------|
| cg19079546 | 0.01638254 | 1.1477E+12 | 163.042399 | 8.08E+21   | cg23589617 | 0.03023804 | 12.3643037 | 1.27153185 | 120.229788 |
| cg20852788 | 0.01639164 | 21.1424643 | 1.7498454  | 255.453308 | cg08165784 | 0.03024674 | 13.4612462 | 1.28173962 | 141.374385 |
| cg15907372 | 0.01639334 | 110.556955 | 2.36981772 | 5157.71327 | cg04006061 | 0.03026506 | 8.90263902 | 1.23185743 | 64.3394111 |
| cg15253243 | 0.01639509 | 52474.7748 | 7.33490657 | 375410644  | cg18770763 | 0.03026963 | 61.8760993 | 1.48191026 | 2583.59211 |
| cg25355924 | 0.01639544 | 93623462   | 28.9413025 | 3.0287E+14 | cg11992317 | 0.03027368 | 1183274.54 | 3.79258006 | 3.6918E+11 |
| cg24158160 | 0.01640026 | 6.08825438 | 1.39252983 | 26.6183465 | cg03184776 | 0.03027787 | 10.1036155 | 1.24661305 | 81.8883192 |
| cg02283238 | 0.0164106  | 6.6392226  | 1.41461047 | 31.1600102 | cg23504474 | 0.0302814  | 8.80018189 | 1.23025895 | 62.9486996 |
| cg12855166 | 0.01641328 | 5.57154097 | 1.369841   | 22.6610745 | cg00051483 | 0.03029211 | 0.08835732 | 0.00983629 | 0.7936951  |
| cg17559110 | 0.01641373 | 52142.8018 | 7.3151201  | 371678351  | cg08122234 | 0.03030273 | 6.88520004 | 1.20155522 | 39.45385   |
| cg03018679 | 0.01641382 | 9.55437981 | 1.51209445 | 60.3706825 | cg17707347 | 0.03030764 | 40255244.7 | 5.29102051 | 3.0627E+14 |
| cg02993070 | 0.01641514 | 8.88621743 | 1.49211089 | 52.9215761 | cg04482943 | 0.0303205  | 703549.831 | 3.59677686 | 1.3762E+11 |
| cg09388058 | 0.01641528 | 63731.6275 | 7.58810111 | 535274936  | cg18639233 | 0.03032541 | 4.78235622 | 1.16037034 | 19.7100273 |
| cg20964023 | 0.01641583 | 275418.002 | 9.92100791 | 7645904201 | cg18116600 | 0.03034139 | 130.554656 | 1.58822049 | 10731.8338 |
| cg01421867 | 0.01642562 | 880513.564 | 12.2624848 | 6.3226E+10 | cg22505962 | 0.03035116 | 48.5996086 | 1.44566868 | 1633.79202 |
| cg01907051 | 0.01643648 | 9.27875614 | 1.50343092 | 57.2658937 | cg06155802 | 0.03035634 | 891655.975 | 3.66885969 | 2.167E+11  |
| cg05414908 | 0.01643766 | 12.8171546 | 1.59497391 | 102.998206 | cg04397817 | 0.03036074 | 4162.52176 | 2.20446574 | 7859767.14 |
| cg25520440 | 0.01644036 | 0.09090591 | 0.01281642 | 0.64478904 | cg04510815 | 0.03036123 | 17.4972065 | 1.31188196 | 233.368735 |
| cg26156179 | 0.01645757 | 92120.5787 | 8.08820198 | 1049207357 | cg00319168 | 0.03036391 | 9.59827268 | 1.239213   | 74.3430214 |
| cg25295726 | 0.01646047 | 67.63167   | 2.16095972 | 2116.67193 | cg00436603 | 0.03036543 | 0.09553517 | 0.01140339 | 0.80037322 |
| cg02491878 | 0.01646839 | 15.7886777 | 1.65595318 | 150.537073 | cg18044111 | 0.03037019 | 13.3640478 | 1.27861378 | 139.680784 |
| cg17264609 | 0.01646964 | 7.16407943 | 1.43320543 | 35.8106612 | cg06288697 | 0.03040276 | 6.71699858 | 1.19748327 | 37.6774114 |
| cg23709674 | 0.01647525 | 4877195.55 | 16.6800166 | 1.4261E+12 | cg09992116 | 0.03040959 | 3133.92351 | 2.14130453 | 4586679.03 |
| cg01620672 | 0.01647847 | 0.11830023 | 0.02067051 | 0.67704875 | cg24333845 | 0.03041459 | 13.3139129 | 1.27735644 | 138.771194 |
| cg07565021 | 0.01647917 | 59.863824  | 2.11206087 | 1696.76806 | cg00973823 | 0.03041503 | 16.5000543 | 1.30352693 | 208.857819 |
| cg01175550 | 0.01647948 | 4.54353657 | 1.31859424 | 15.6558583 | cg18862975 | 0.03041888 | 15.6095088 | 1.29663136 | 187.915217 |
| cg13463731 | 0.01648606 | 11.6792695 | 1.56665089 | 87.0681132 | cg27313941 | 0.03042537 | 13.0234595 | 1.27450254 | 133.079764 |
| cg10960266 | 0.01650025 | 0.06699672 | 0.00735211 | 0.61051339 | cg15405796 | 0.03043318 | 249.72994  | 1.68444461 | 37024.0982 |
| cg13752649 | 0.01650749 | 17.250724  | 1.68155999 | 176.971075 | cg26188299 | 0.03044324 | 19903.393  | 2.54580923 | 155606731  |
| cg25429672 | 0.01650853 | 11.2061463 | 1.55422275 | 80.7977592 | cg18226566 | 0.03045513 | 43988559.1 | 5.26075534 | 3.6782E+14 |
| cg01558492 | 0.01651718 | 3049.66235 | 4.32121999 | 2152271.92 | cg24902075 | 0.03045763 | 1.6116E+10 | 9.17868831 | 2.8296E+19 |

|            |            |            |            |            |            |            |            |            |            |
|------------|------------|------------|------------|------------|------------|------------|------------|------------|------------|
| cg02043083 | 0.01652213 | 232.788957 | 2.7020841  | 20055.1486 | cg22165175 | 0.03050945 | 14.0856351 | 1.28242412 | 154.710999 |
| cg11974977 | 0.01652748 | 619887567  | 40.1080796 | 9.5806E+15 | cg00157359 | 0.03051352 | 7.87472852 | 1.21412298 | 51.075015  |
| cg15130433 | 0.01654375 | 3246509.71 | 15.3646184 | 6.8598E+11 | cg15190760 | 0.03051967 | 12.5822673 | 1.26870541 | 124.783459 |
| cg02928644 | 0.01654591 | 5.13773943 | 1.34743088 | 19.5901451 | cg14572436 | 0.03053027 | 116.946228 | 1.56401252 | 8744.44415 |
| cg16763443 | 0.01655348 | 9.00589911 | 1.49233182 | 54.3486494 | cg11800672 | 0.03053222 | 6.97795052 | 1.20016271 | 40.5709935 |
| cg02320501 | 0.01655599 | 10.3825344 | 1.53143508 | 70.3895464 | cg13661211 | 0.03053492 | 2130813.07 | 3.92882055 | 1.1557E+12 |
| cg21510910 | 0.01656382 | 4.119E+12  | 198.050833 | 8.57E+22   | cg24490630 | 0.03053854 | 7732.8993  | 2.31764058 | 25801123.9 |
| cg23011817 | 0.01656944 | 3509443.79 | 15.538682  | 7.9262E+11 | cg21644628 | 0.03054474 | 0.00321003 | 1.77E-05   | 0.58343152 |
| cg04657044 | 0.01657529 | 15.0148665 | 1.63722157 | 137.700493 | cg02476533 | 0.03057806 | 58.6092888 | 1.46419895 | 2346.02596 |
| cg15545878 | 0.01657656 | 11.7760856 | 1.56636957 | 88.5335067 | cg00836482 | 0.0305844  | 4.01787356 | 1.1390785  | 14.1722523 |
| cg25756241 | 0.01657855 | 54.2387282 | 2.06810705 | 1422.47938 | cg13421439 | 0.03058893 | 5.11637155 | 1.16510316 | 22.4677598 |
| cg15726260 | 0.01658118 | 5.96972532 | 1.38412836 | 25.7473377 | cg16296724 | 0.03058909 | 5430466.81 | 4.26999717 | 6.9063E+12 |
| cg07087293 | 0.01658356 | 11.1580448 | 1.55088056 | 80.2782419 | cg15977246 | 0.0305913  | 218735776  | 6.03356367 | 7.9299E+15 |
| cg01015652 | 0.01658867 | 15.6052761 | 1.64829593 | 147.743278 | cg05355225 | 0.03059845 | 5.01684591 | 1.16286552 | 21.6437261 |
| cg04653284 | 0.01659391 | 4015847270 | 55.7672357 | 2.8918E+17 | cg13109300 | 0.03060642 | 25127.6634 | 2.57910949 | 244812975  |
| cg11346237 | 0.01659978 | 47.5567496 | 2.01797128 | 1120.75155 | cg26515676 | 0.03061583 | 506803.098 | 3.41336367 | 7.5248E+10 |
| cg14645027 | 0.01660791 | 8.68071089 | 1.48105284 | 50.8791715 | cg16532497 | 0.03062988 | 8.92487839 | 1.22679494 | 64.9280919 |
| cg20660171 | 0.01660831 | 115.593229 | 2.37085822 | 5635.84719 | cg19815376 | 0.0306345  | 10.7528313 | 1.2482536  | 92.6281173 |
| cg11090352 | 0.01660847 | 8.95286514 | 1.48937147 | 53.8171946 | cg03623835 | 0.03063756 | 6.86309973 | 1.19697071 | 39.3511198 |
| cg16278496 | 0.0166091  | 10.2831007 | 1.52732561 | 69.2335408 | cg10348922 | 0.03063865 | 8.53546625 | 1.22156974 | 59.6398075 |
| cg26807935 | 0.01661183 | 93364.613  | 8.00056879 | 1089541405 | cg23466060 | 0.03064011 | 11.7202304 | 1.258239   | 109.17147  |
| cg26912671 | 0.01662145 | 22.2748315 | 1.7571572  | 282.369796 | cg00144465 | 0.03065207 | 33990985.4 | 5.03973452 | 2.2926E+14 |
| cg02204038 | 0.01663754 | 11348771.7 | 19.0797187 | 6.7503E+12 | cg24144070 | 0.03066501 | 289.297981 | 1.69583097 | 49352.3961 |
| cg27304533 | 0.01664227 | 8.86940577 | 1.48601222 | 52.9378949 | cg26505878 | 0.03068627 | 171.426554 | 1.6141523  | 18205.8802 |
| cg05411944 | 0.01664324 | 0.08087193 | 0.01032283 | 0.6335734  | cg02704345 | 0.03068698 | 47873.5825 | 2.72645308 | 840608597  |
| cg27607583 | 0.01664789 | 183827016  | 31.5836191 | 1.0699E+15 | cg11974977 | 0.03070245 | 288814204  | 6.12008382 | 1.3629E+16 |
| cg21061582 | 0.01665261 | 11.6257867 | 1.56051558 | 86.6117055 | cg02690256 | 0.03070872 | 23.3909818 | 1.3404848  | 408.164293 |
| cg03461399 | 0.01665514 | 826.885677 | 3.3819759  | 202171.732 | cg20701689 | 0.03071849 | 5.68854482 | 1.17528223 | 27.5334224 |
| cg10187703 | 0.0166558  | 10.6880999 | 1.53680349 | 74.3331736 | cg02486145 | 0.03072391 | 6.25646001 | 1.18565466 | 33.0140751 |
| cg13531989 | 0.0166588  | 615411919  | 39.2599006 | 9.6468E+15 | cg07667560 | 0.03072875 | 14.4760115 | 1.28163256 | 163.50623  |



|            |            |            |            |            |            |            |            |            |            |
|------------|------------|------------|------------|------------|------------|------------|------------|------------|------------|
| cg22132343 | 0.01666607 | 0.10159031 | 0.01562289 | 0.66060699 | cg10705379 | 0.0307331  | 6.09901445 | 1.18274468 | 31.4505555 |
| cg06839900 | 0.01667946 | 7.3104337  | 1.43398663 | 37.2684372 | cg12516270 | 0.03074916 | 24.2419468 | 1.34400368 | 437.254741 |
| cg01035068 | 0.01667974 | 90.6636284 | 2.26297481 | 3632.33982 | cg17783086 | 0.03076638 | 6.94338748 | 1.19664691 | 40.2880996 |
| cg13992236 | 0.01668129 | 546696727  | 38.2953015 | 7.8045E+15 | cg20890243 | 0.03077388 | 30.3219176 | 1.37155947 | 670.345479 |
| cg19081101 | 0.01668415 | 5.14137665 | 1.3453069  | 19.6488652 | cg01528492 | 0.03077668 | 12.9890702 | 1.26795369 | 133.061598 |
| cg10226922 | 0.01668524 | 2.2352E+16 | 915.713084 | 5.46E+29   | cg27173965 | 0.03077989 | 13.0273131 | 1.26824215 | 133.815839 |
| cg26140483 | 0.01668527 | 0.09480611 | 0.01377284 | 0.65260298 | cg16674492 | 0.03078744 | 3.50259782 | 1.12297981 | 10.9246768 |
| cg08169325 | 0.0166996  | 8.13122572 | 1.46144003 | 45.2408792 | cg07690778 | 0.03078814 | 759.222409 | 1.84717097 | 312054.854 |
| cg26960317 | 0.0167028  | 0.00734812 | 0.00013141 | 0.41089322 | cg08085208 | 0.0307928  | 71406.2063 | 2.81171094 | 1813431894 |
| cg20371266 | 0.01671154 | 5.89702173 | 1.37864216 | 25.2239967 | cg10056728 | 0.0307973  | 26.9354955 | 1.35603289 | 535.031949 |
| cg08447739 | 0.01671562 | 8.30334298 | 1.46661892 | 47.0098289 | cg09619475 | 0.03081821 | 71551984.8 | 5.31459681 | 9.6333E+14 |
| cg02852873 | 0.016716   | 1312.68915 | 3.66563592 | 470082.911 | cg06646636 | 0.03083222 | 42.6266787 | 1.41382999 | 1285.18546 |
| cg24719487 | 0.01671947 | 9.66994102 | 1.50751219 | 62.027863  | cg15622885 | 0.03083453 | 5335341.43 | 4.17580847 | 6.8169E+12 |
| cg02154874 | 0.01671956 | 544801537  | 38.050375  | 7.8004E+15 | cg23175074 | 0.03083497 | 11.3045902 | 1.25079252 | 102.17023  |
| cg18938674 | 0.01672326 | 60206.367  | 7.31964256 | 495216344  | cg07297068 | 0.0308601  | 0.11520457 | 0.01619612 | 0.81946117 |
| cg25917723 | 0.01672581 | 85402.289  | 7.79572067 | 935583927  | cg02970696 | 0.03086282 | 3.855042   | 1.13236192 | 13.124204  |
| cg15827486 | 0.01672862 | 1.9973E+12 | 167.599976 | 2.38E+22   | cg10115182 | 0.03086885 | 822991.318 | 3.50538253 | 1.9322E+11 |
| cg21145140 | 0.01673304 | 13.0104367 | 1.59022731 | 106.444822 | cg09423126 | 0.03087443 | 9.89758557 | 1.23494028 | 79.3254556 |
| cg23115158 | 0.01673371 | 1076096.42 | 12.3169272 | 9.4016E+10 | cg10713002 | 0.03087551 | 571.171193 | 1.79376219 | 181872.789 |
| cg05842391 | 0.01673733 | 21084.7018 | 6.04805114 | 73505438   | cg19527084 | 0.03088316 | 4.09993063 | 1.13862759 | 14.7628876 |
| cg00762037 | 0.01674098 | 5610.94389 | 4.75977365 | 6614325.32 | cg20402382 | 0.03088838 | 367.020238 | 1.72149259 | 78248.2919 |
| cg04885941 | 0.01674176 | 4413883.96 | 15.8825442 | 1.2267E+12 | cg26857670 | 0.03089303 | 6.54652517 | 1.18860538 | 36.0565352 |
| cg03616995 | 0.01674619 | 6.5067E+12 | 206.697875 | 2.05E+23   | cg13050390 | 0.03090389 | 7.30215295 | 1.20046458 | 44.4173352 |
| cg20607798 | 0.01674933 | 8.18206331 | 1.46194163 | 45.7926354 | cg16079865 | 0.03091506 | 0.00538204 | 4.68E-05   | 0.61889355 |
| cg18907495 | 0.01675021 | 77.3546336 | 2.19374884 | 2727.63191 | cg07115761 | 0.03093365 | 13.391741  | 1.2687395  | 141.351891 |
| cg18642003 | 0.01675471 | 2385.16348 | 4.07466113 | 1396190.91 | cg14331899 | 0.03094031 | 9.87257391 | 1.23364446 | 79.0079469 |
| cg06857614 | 0.01675533 | 5.43886358 | 1.3578559  | 21.785255  | cg03997400 | 0.03096208 | 2007.69517 | 2.00664633 | 2008744.55 |
| cg14775474 | 0.01675668 | 31286.8841 | 6.48551656 | 150931558  | cg13694291 | 0.03096936 | 2014294.97 | 3.77661007 | 1.0743E+12 |
| cg17518962 | 0.01675754 | 10.9973775 | 1.54194585 | 78.4348628 | cg25104555 | 0.03096953 | 3.58246274 | 1.12390927 | 11.4191061 |
| cg04844391 | 0.01676006 | 6.1806E+13 | 309.430002 | 1.23E+25   | cg08069043 | 0.03097417 | 7421.93351 | 2.26058254 | 24367655.7 |

|            |            |            |            |            |            |            |            |            |            |
|------------|------------|------------|------------|------------|------------|------------|------------|------------|------------|
| cg18003795 | 0.01676213 | 0.00625627 | 9.79E-05   | 0.40000396 | cg03324464 | 0.0309924  | 15.4082873 | 1.28405394 | 184.895128 |
| cg18832407 | 0.01676232 | 7.83924372 | 1.45038882 | 42.3705294 | cg21915765 | 0.03101616 | 48910.1044 | 2.67977058 | 892687730  |
| cg23352722 | 0.01677921 | 6.06798338 | 1.38452188 | 26.5943233 | cg03137131 | 0.03103937 | 7.09289057 | 1.19554345 | 42.0805257 |
| cg26300461 | 0.01678236 | 6.69559825 | 1.40926807 | 31.8115743 | cg26981201 | 0.03105111 | 70.0090809 | 1.47264007 | 3328.22086 |
| cg04984052 | 0.01678238 | 3286.54086 | 4.3103195  | 2505928.12 | cg07702750 | 0.03105208 | 7.98000566 | 1.2082846  | 52.703221  |
| cg03269218 | 0.01678299 | 5.95164268 | 1.379624   | 25.6751481 | cg24827036 | 0.03107195 | 3494125.39 | 3.93887594 | 3.0996E+12 |
| cg12520032 | 0.01679402 | 1009499580 | 42.0518355 | 2.4234E+16 | cg06214007 | 0.03107619 | 6.37059123 | 1.18345886 | 34.2930658 |
| cg24938727 | 0.01679512 | 18.0030289 | 1.68413345 | 192.448556 | cg05147525 | 0.03108262 | 343.582464 | 1.70061067 | 69415.5999 |
| cg01214054 | 0.01680163 | 4.53820414 | 1.31348137 | 15.6799307 | cg10256686 | 0.03108687 | 41100.1132 | 2.62686408 | 643055466  |
| cg07418892 | 0.01680295 | 8.58934345 | 1.47355469 | 50.0672432 | cg22927247 | 0.03109277 | 11.6490371 | 1.24997359 | 108.562345 |
| cg08420572 | 0.0168184  | 5.73319328 | 1.36971269 | 23.9973722 | cg23601586 | 0.03112061 | 1107.72824 | 1.88890582 | 649615.154 |
| cg09176275 | 0.01683547 | 12.1305587 | 1.56721581 | 93.8929114 | cg15106368 | 0.03112545 | 52.484528  | 1.43221177 | 1923.33686 |
| cg14697743 | 0.01683614 | 4.87465869 | 1.32998191 | 17.866632  | cg05286653 | 0.03113081 | 10.6973641 | 1.23972647 | 92.3055209 |
| cg00088227 | 0.0168369  | 1.9018E+11 | 107.260935 | 3.37E+20   | cg20546782 | 0.03114457 | 81.1204136 | 1.48922925 | 4418.74311 |
| cg24981593 | 0.01683721 | 5.02717185 | 1.33736123 | 18.8972556 | cg10510478 | 0.03115244 | 4.95713976 | 1.15599617 | 21.2571938 |
| cg01262913 | 0.01685076 | 7.92453561 | 1.45123439 | 43.2723101 | cg02847589 | 0.03116134 | 79698188.5 | 5.18959184 | 1.224E+15  |
| cg27148665 | 0.01685402 | 9.1177696  | 1.48824209 | 55.8603488 | cg10997640 | 0.03116238 | 4740631.09 | 4.01948095 | 5.5912E+12 |
| cg10902825 | 0.01686195 | 5.57786564 | 1.36218868 | 22.8401436 | cg01200642 | 0.03117241 | 7.7035E+10 | 9.65311495 | 6.15E+20   |
| cg09908601 | 0.0168628  | 1531.84186 | 3.73918003 | 627554.562 | cg11920449 | 0.03117455 | 9.87129608 | 1.23006087 | 79.2176136 |
| cg09080746 | 0.01686391 | 2.67E-10   | 3.74E-18   | 0.01898542 | cg12008118 | 0.03118293 | 46.4810651 | 1.4148338  | 1527.027   |
| cg24287110 | 0.01686428 | 88.3056353 | 2.23827262 | 3483.88537 | cg20746096 | 0.03118344 | 292742.836 | 3.1196207  | 2.7471E+10 |
| cg07898632 | 0.01686438 | 5.90169729 | 1.37603872 | 25.3118102 | cg13661243 | 0.03118547 | 9.49669582 | 1.2256024  | 73.5860437 |
| cg02577849 | 0.0168653  | 2818381766 | 50.0213627 | 1.588E+17  | cg20818283 | 0.03118566 | 779740.859 | 3.40790657 | 1.7841E+11 |
| cg02483701 | 0.01686613 | 13.3760369 | 1.5940873  | 112.238749 | cg27111970 | 0.03120328 | 4.23916931 | 1.13928198 | 15.7735809 |
| cg08958015 | 0.01686772 | 5.02193571 | 1.33661799 | 18.8683966 | cg08871855 | 0.031226   | 8.43480012 | 1.21197348 | 58.7024833 |
| cg02371464 | 0.01686934 | 15.8719724 | 1.6437771  | 153.256489 | cg10297105 | 0.03122766 | 20.67886   | 1.31399454 | 325.431527 |
| cg19585103 | 0.01687046 | 4.14928497 | 1.29148902 | 13.3307875 | cg25697727 | 0.03124737 | 14.2703624 | 1.27042412 | 160.295479 |
| cg02951062 | 0.01687635 | 6.36058587 | 1.39446075 | 29.0126866 | cg06160809 | 0.03125391 | 14.2790664 | 1.27037497 | 160.497287 |
| cg15080119 | 0.01688561 | 4.17925934 | 1.29295188 | 13.5087848 | cg05250768 | 0.03126963 | 4.19386214 | 1.13759421 | 15.4611192 |
| cg19050940 | 0.01688684 | 16.6456176 | 1.65729185 | 167.186356 | cg25782440 | 0.03127069 | 78.2274083 | 1.47994605 | 4134.96656 |

|            |            |            |            |            |            |            |            |            |            |
|------------|------------|------------|------------|------------|------------|------------|------------|------------|------------|
| cg08611810 | 0.01688733 | 8.42756528 | 1.466538   | 48.4296053 | cg15011837 | 0.03127302 | 44.9023767 | 1.4078196  | 1432.16037 |
| cg04383058 | 0.01688799 | 10.7018233 | 1.53082986 | 74.8149914 | cg03265267 | 0.03131048 | 275.579085 | 1.65538074 | 45876.9577 |
| cg16733558 | 0.01689489 | 13.891988  | 1.60406479 | 120.311432 | cg21328770 | 0.03131765 | 143044.608 | 2.89910198 | 7057964805 |
| cg13572511 | 0.01689911 | 29.3558583 | 1.83454264 | 469.744554 | cg18146843 | 0.03131791 | 4.69793923 | 1.14880251 | 19.21186   |
| cg21785710 | 0.01690178 | 7.13041634 | 1.42285831 | 35.7328885 | cg26764215 | 0.03133241 | 1273884.66 | 3.52313738 | 4.6061E+11 |
| cg18507365 | 0.01691619 | 82.7777165 | 2.20862007 | 3102.4577  | cg26522057 | 0.03135927 | 8991399.79 | 4.18750678 | 1.9306E+13 |
| cg11613427 | 0.01691922 | 22.9853359 | 1.75487899 | 301.061023 | cg01550161 | 0.03138615 | 50.8992277 | 1.42037494 | 1823.97711 |
| cg06427502 | 0.01692441 | 221.192255 | 2.63369689 | 18576.9341 | cg15283028 | 0.0313868  | 3.9092E+12 | 13.3162627 | 1.15E+24   |
| cg01404317 | 0.01692534 | 15.1742944 | 1.62869368 | 141.376622 | cg24921484 | 0.03138874 | 6.5611E+12 | 13.9421434 | 3.09E+24   |
| cg16523704 | 0.01692705 | 5.76954934 | 1.36932321 | 24.3096    | cg05735639 | 0.03139629 | 14.0224816 | 1.26574052 | 155.347788 |
| cg15306012 | 0.01692839 | 12.564501  | 1.57439538 | 100.271309 | cg25153340 | 0.03140005 | 11640436.6 | 4.27008831 | 3.1732E+13 |
| cg27555036 | 0.01692926 | 16.7356066 | 1.6574186  | 168.985992 | cg20929545 | 0.0314132  | 7.03285117 | 1.18993311 | 41.5661985 |
| cg11316887 | 0.01693004 | 12.9762061 | 1.5834749  | 106.336972 | cg04014328 | 0.03141646 | 7.44165423 | 1.1959001  | 46.3067256 |
| cg02096916 | 0.01693796 | 5.0359E+14 | 432.045012 | 5.87E+26   | cg09216143 | 0.03142094 | 0.12858494 | 0.01984996 | 0.83295301 |
| cg27123665 | 0.01693911 | 352.783316 | 2.86187365 | 43487.6179 | cg21041329 | 0.03142355 | 181447.928 | 2.94123884 | 1.1194E+10 |
| cg02696067 | 0.01694113 | 12.4139285 | 1.57061893 | 98.1177667 | cg00456593 | 0.03142535 | 0.06781768 | 0.00584516 | 0.78684537 |
| cg12800244 | 0.01694538 | 28.8967531 | 1.82723485 | 456.986873 | cg02344701 | 0.03144249 | 0.00641416 | 6.45E-05   | 0.63804222 |
| cg01793704 | 0.01694723 | 153.692827 | 2.46509405 | 9582.38697 | cg18581950 | 0.03144808 | 13.1366817 | 1.25748992 | 137.235618 |
| cg10037049 | 0.01695317 | 6.48771304 | 1.39792984 | 30.109108  | cg11843238 | 0.03146192 | 5.902676   | 1.17094903 | 29.7549963 |
| cg24310786 | 0.0169536  | 17.3810217 | 1.66783908 | 181.132532 | cg05651995 | 0.03146361 | 57.5666578 | 1.43365408 | 2311.52001 |
| cg03812679 | 0.01696205 | 36.7355377 | 1.90668972 | 707.771022 | cg04918402 | 0.03147569 | 6.98628101 | 1.18845306 | 41.0686161 |
| cg00871610 | 0.01696535 | 10.4006937 | 1.52094423 | 71.123206  | cg10512875 | 0.0314771  | 3.93787781 | 1.12944203 | 13.7296836 |
| cg16473288 | 0.01697059 | 0.16709125 | 0.03846038 | 0.72592849 | cg03586793 | 0.03147788 | 9.72107002 | 1.22380604 | 77.217467  |
| cg26833120 | 0.01697193 | 11.922733  | 1.55840788 | 91.2158902 | cg19705910 | 0.03148655 | 6.40808888 | 1.17924191 | 34.822035  |
| cg17246140 | 0.01698236 | 5.40294415 | 1.35235482 | 21.585907  | cg24812891 | 0.03148845 | 440.627131 | 1.71653691 | 113106.958 |
| cg04926361 | 0.016985   | 7.03202007 | 1.41759656 | 34.8824959 | cg17684754 | 0.03150963 | 80.9184717 | 1.4761027  | 4435.86958 |
| cg26511108 | 0.01698695 | 0.1271625  | 0.02338546 | 0.69146828 | cg26450387 | 0.03152028 | 61.7147506 | 1.44074056 | 2643.57828 |
| cg24876960 | 0.01699067 | 3.78680194 | 1.2689234  | 11.3008153 | cg06527213 | 0.03152481 | 11.2133966 | 1.23867164 | 101.512185 |
| cg20941170 | 0.01700329 | 26277400.2 | 21.2051429 | 3.2563E+13 | cg07138512 | 0.03153119 | 31.0769783 | 1.35552384 | 712.476282 |
| cg06349174 | 0.0170108  | 170199601  | 29.5825421 | 9.7922E+14 | cg22622425 | 0.03155155 | 32143.1614 | 2.50302291 | 412774020  |

|            |            |            |            |            |            |            |            |            |            |
|------------|------------|------------|------------|------------|------------|------------|------------|------------|------------|
| cg03157027 | 0.01701291 | 7.0722138  | 1.41846645 | 35.2607622 | cg19486585 | 0.03156822 | 13520949   | 4.26387266 | 4.2876E+13 |
| cg21653581 | 0.01702132 | 5123.71031 | 4.59924018 | 5707987.92 | cg17390562 | 0.0315722  | 5507.08932 | 2.13951439 | 14175194.6 |
| cg11930955 | 0.01702214 | 9569.50616 | 5.14195352 | 17809466.3 | cg17373751 | 0.03157763 | 23.0540747 | 1.31913109 | 402.909434 |
| cg02631838 | 0.01702963 | 14.6210406 | 1.61451315 | 132.408229 | cg04920683 | 0.03157801 | 2742170.3  | 3.70057396 | 2.032E+12  |
| cg04795713 | 0.01703137 | 4143.91259 | 4.42537113 | 3880355.13 | cg08000847 | 0.03158495 | 6377830.79 | 3.98449097 | 1.0209E+13 |
| cg14807549 | 0.01703561 | 6034880862 | 55.7436344 | 6.5334E+17 | cg01439366 | 0.03158648 | 704431.455 | 3.2802278  | 1.5128E+11 |
| cg07486252 | 0.01703934 | 7.34901928 | 1.42767222 | 37.8294706 | cg10007534 | 0.03158683 | 0.00470813 | 3.56E-05   | 0.62330413 |
| cg13313046 | 0.0170443  | 11426297.7 | 18.1815063 | 7.1809E+12 | cg22624697 | 0.03159324 | 52.4527341 | 1.41794023 | 1940.34224 |
| cg18802611 | 0.01705641 | 4247521.09 | 15.2171104 | 1.1856E+12 | cg23272399 | 0.03160236 | 7.06904144 | 1.18811761 | 42.0592595 |
| cg06470558 | 0.01705711 | 68.6403737 | 2.12618447 | 2215.94174 | cg06178310 | 0.0316055  | 7.45946124 | 1.19372    | 46.6135795 |
| cg21688288 | 0.017064   | 0.0584464  | 0.00566804 | 0.60267444 | cg07167398 | 0.03160564 | 1.8245E+13 | 14.7419192 | 2.26E+25   |
| cg08374291 | 0.01707299 | 23747761.2 | 20.6424503 | 2.732E+13  | cg13549667 | 0.03160565 | 26.5985615 | 1.3352312  | 529.858403 |
| cg17783086 | 0.01707416 | 6.68883318 | 1.40319453 | 31.8847375 | cg00341935 | 0.03160728 | 0.00117287 | 2.49E-06   | 0.55178752 |
| cg25766046 | 0.01707872 | 10.8466877 | 1.52934553 | 76.9287458 | cg10090217 | 0.03160791 | 18698.2367 | 2.37888398 | 146969780  |
| cg20699549 | 0.01708708 | 6.32561902 | 1.3890535  | 28.8062742 | cg09638001 | 0.03160992 | 281234.41  | 3.02022777 | 2.6188E+10 |
| cg13383058 | 0.01709748 | 7.02725098 | 1.41511619 | 34.8962556 | cg07701375 | 0.03161052 | 2239158840 | 6.66304038 | 7.5248E+17 |
| cg25570328 | 0.01709839 | 0.04865817 | 0.00405591 | 0.58374461 | cg20034372 | 0.03161736 | 5.60097175 | 1.16382854 | 26.9549024 |
| cg08698605 | 0.01711516 | 23.8309325 | 1.75814704 | 323.018115 | cg21496913 | 0.03163989 | 1996.73998 | 1.95080871 | 2043752.69 |
| cg00928397 | 0.01711615 | 11.6043469 | 1.54680648 | 87.0573458 | cg04755365 | 0.03165126 | 21.2679677 | 1.30819682 | 345.763301 |
| cg22488745 | 0.01712536 | 6.69596545 | 1.40244802 | 31.9697791 | cg07099000 | 0.0316571  | 5.89360511 | 1.16861834 | 29.7227761 |
| cg02120774 | 0.01712715 | 6.21776316 | 1.38405261 | 27.9328823 | cg09467487 | 0.03165981 | 211.479636 | 1.60038748 | 27945.5051 |
| cg05176146 | 0.01713204 | 1.7038E+11 | 99.3497111 | 2.92E+20   | cg05488632 | 0.03166866 | 16.4444971 | 1.27862683 | 211.493673 |
| cg18070812 | 0.01713518 | 0.08704728 | 0.01169548 | 0.64787647 | cg24830559 | 0.03167324 | 6782.2839  | 2.16884851 | 21209123   |
| cg04617640 | 0.01714216 | 6.99554739 | 1.41306659 | 34.6322557 | cg19099736 | 0.03168135 | 2679.08109 | 1.99838952 | 3591629.87 |
| cg19558029 | 0.01714237 | 6.97369371 | 1.4122768  | 34.4354618 | cg16674484 | 0.03169384 | 7.63781251 | 1.19505854 | 48.8144955 |
| cg01943874 | 0.0171428  | 4.04361027 | 1.28187952 | 12.7553204 | cg09661370 | 0.03172521 | 8.846495   | 1.21010321 | 64.6725611 |
| cg04199779 | 0.01715414 | 384.502414 | 2.87887688 | 51354.0914 | cg02965250 | 0.03174255 | 64.2831509 | 1.43880701 | 2872.04847 |
| cg22312127 | 0.01715477 | 9.2061E+11 | 133.485665 | 6.35E+21   | cg04962480 | 0.03175419 | 245.188037 | 1.61681537 | 37182.4606 |
| cg06527213 | 0.01715577 | 8.59433157 | 1.46540338 | 50.4042343 | cg15726260 | 0.03176053 | 8.20057181 | 1.20162648 | 55.9652929 |
| cg03662064 | 0.01715835 | 10.987581  | 1.53070024 | 78.8703976 | cg03080561 | 0.03176367 | 4350868.73 | 3.79638176 | 4.9863E+12 |

|            |            |            |            |            |            |            |            |            |            |
|------------|------------|------------|------------|------------|------------|------------|------------|------------|------------|
| cg25699052 | 0.01716026 | 4.78E-05   | 1.34E-08   | 0.17087961 | cg01093696 | 0.03176696 | 8.61182884 | 1.20668074 | 61.4608266 |
| cg02313495 | 0.01716473 | 15.2023462 | 1.6213655  | 142.541167 | cg23371754 | 0.0317678  | 7.15074264 | 1.18725263 | 43.0684413 |
| cg27071285 | 0.01717016 | 77.0790157 | 2.16272825 | 2747.07405 | cg04762213 | 0.03177729 | 149.361316 | 1.54737132 | 14417.2265 |
| cg10625266 | 0.01717556 | 21.5574388 | 1.7246867  | 269.453676 | cg27083176 | 0.03177826 | 19908019.3 | 4.32952959 | 9.1541E+13 |
| cg00188032 | 0.01717622 | 5.72850245 | 1.36315966 | 24.0732918 | cg27380724 | 0.03178622 | 0.12804462 | 0.01961185 | 0.83599577 |
| cg06443918 | 0.01719331 | 849904.462 | 11.2634166 | 6.4131E+10 | cg10539808 | 0.03181282 | 17.5622592 | 1.28319257 | 240.363728 |
| cg18067644 | 0.01720148 | 16.0256211 | 1.63538767 | 157.039543 | cg23865240 | 0.0318155  | 7.02455112 | 1.1848211  | 41.6470624 |
| cg05797937 | 0.01721567 | 123.054526 | 2.34621296 | 6453.98209 | cg17476026 | 0.03181878 | 10.2249818 | 1.22410691 | 85.4094134 |
| cg02818811 | 0.01721628 | 5.681201   | 1.36045501 | 23.7244484 | cg09671955 | 0.03182655 | 5.46939771 | 1.15918978 | 25.8062241 |
| cg00778544 | 0.01721651 | 2177390920 | 45.1475491 | 1.0501E+17 | cg26782361 | 0.03184392 | 17.6348915 | 1.2830421  | 242.384407 |
| cg09180877 | 0.01721724 | 0.13886287 | 0.02735879 | 0.70481531 | cg06970090 | 0.03185269 | 23.6104887 | 1.31577804 | 423.669616 |
| cg09938049 | 0.01722488 | 12.8610139 | 1.57213285 | 105.211006 | cg18832152 | 0.03185332 | 20.3225561 | 1.29874957 | 318.00302  |
| cg16003064 | 0.01723285 | 82.26151   | 2.18339216 | 3099.28566 | cg19628148 | 0.03185733 | 5.38645407 | 1.15733063 | 25.0696617 |
| cg02096793 | 0.01723337 | 6.51077838 | 1.39338196 | 30.4225519 | cg09927483 | 0.03186991 | 51680.145  | 2.56255679 | 1042254906 |
| cg01510388 | 0.01723453 | 9.6149149  | 1.49293887 | 61.9225545 | cg19844724 | 0.03187039 | 1452.98197 | 1.88009114 | 1122901.2  |
| cg08114317 | 0.01723748 | 10.9202794 | 1.52689369 | 78.1013794 | cg14431006 | 0.03187168 | 7.74597829 | 1.19420768 | 50.2426675 |
| cg24591969 | 0.01723752 | 0.19213846 | 0.04943759 | 0.74674335 | cg10937302 | 0.03189464 | 58.1814997 | 1.42162388 | 2381.141   |
| cg14871010 | 0.01723841 | 0.04536532 | 0.00355838 | 0.57835665 | cg19620294 | 0.03190371 | 7.21541685 | 1.18648357 | 43.8794447 |
| cg14019947 | 0.01724423 | 1.6741E+11 | 96.9390447 | 2.89E+20   | cg18789887 | 0.03191144 | 7.81227339 | 1.19456966 | 51.0908803 |
| cg01542023 | 0.01725262 | 8.32457195 | 1.45491604 | 47.6305824 | cg11216502 | 0.03192899 | 2483.5354  | 1.96473312 | 3139331.26 |
| cg07394446 | 0.01725587 | 6.20486042 | 1.3811397  | 27.8757412 | cg18426477 | 0.03193317 | 13.6791763 | 1.2534877  | 149.279379 |
| cg12796015 | 0.01725598 | 1.6126E+11 | 96.0835661 | 2.71E+20   | cg07705594 | 0.03194212 | 98068.8943 | 2.6969582  | 3566057502 |
| cg13933139 | 0.01726746 | 67997586.2 | 24.2622775 | 1.9057E+14 | cg23447841 | 0.03194668 | 0.12212483 | 0.0178819  | 0.83405403 |
| cg07721872 | 0.0172735  | 180.513079 | 2.50548805 | 13005.4389 | cg26286839 | 0.03194966 | 6.42053972 | 1.17402665 | 35.1127721 |
| cg06315439 | 0.01728    | 9.89414019 | 1.49937197 | 65.2900093 | cg05003455 | 0.03196348 | 50702641   | 4.61561323 | 5.5697E+14 |
| cg23273694 | 0.01730035 | 5.32643322 | 1.34360449 | 21.1155077 | cg22295389 | 0.03196564 | 1582.44691 | 1.88698499 | 1327057.83 |
| cg12943155 | 0.01730418 | 13.1805514 | 1.57660184 | 110.190747 | cg02308209 | 0.03196731 | 6.9944E+10 | 8.60349447 | 5.69E+20   |
| cg26807590 | 0.0173043  | 0.10255217 | 0.01572188 | 0.66893684 | cg24189904 | 0.03196978 | 6.7216921  | 1.17843834 | 38.3398462 |
| cg19539667 | 0.01731027 | 5.5469184  | 1.35309246 | 22.739247  | cg04886060 | 0.03197311 | 7.10241438 | 1.18400542 | 42.6047796 |
| cg06993307 | 0.0173113  | 9.33797487 | 1.48335577 | 58.7841274 | cg16762077 | 0.031974   | 14.5222712 | 1.25924627 | 167.478248 |

|            |            |            |            |            |            |            |            |            |            |
|------------|------------|------------|------------|------------|------------|------------|------------|------------|------------|
| cg23458341 | 0.01731764 | 1793168.14 | 12.6895046 | 2.5339E+11 | cg03716942 | 0.03198665 | 5560550984 | 6.90076369 | 4.4806E+18 |
| cg13990355 | 0.0173178  | 7.50988515 | 1.42726128 | 39.5151021 | cg05605149 | 0.03200656 | 9.5013E+10 | 8.78711174 | 1.03E+21   |
| cg07513446 | 0.0173179  | 10.8178912 | 1.52219869 | 76.8800889 | cg06152533 | 0.03201063 | 15.7585034 | 1.26745867 | 195.927832 |
| cg17532444 | 0.01732423 | 690.048568 | 3.16795785 | 150307.248 | cg23873398 | 0.03201474 | 419055.028 | 3.04190513 | 5.7729E+10 |
| cg18132058 | 0.01732482 | 0.06823257 | 0.00747589 | 0.6227601  | cg22017954 | 0.03203693 | 121414.133 | 2.73094308 | 5397912433 |
| cg16036409 | 0.01732483 | 7.03885791 | 1.41089899 | 35.1162777 | cg09865015 | 0.0320393  | 24.9752834 | 1.31798775 | 473.270547 |
| cg16849609 | 0.01732564 | 7.49021159 | 1.42643497 | 39.3311092 | cg03377767 | 0.03204414 | 18.6061289 | 1.28501541 | 269.403799 |
| cg07034561 | 0.01732656 | 761.181509 | 3.22289556 | 179775.385 | cg09295382 | 0.03205927 | 9286.43724 | 2.18793279 | 39415249.4 |
| cg08962271 | 0.01732708 | 22.6697185 | 1.73409446 | 296.359945 | cg12975295 | 0.03206452 | 26007.5789 | 2.38912582 | 283113661  |
| cg18151074 | 0.01732915 | 3624.14038 | 4.24342059 | 3095237.25 | cg07869830 | 0.03206474 | 22.3700757 | 1.30503942 | 383.452239 |
| cg18508125 | 0.01733326 | 167.268597 | 2.46639891 | 11343.9815 | cg02916102 | 0.03207431 | 5.01055187 | 1.14794832 | 21.8700003 |
| cg14525897 | 0.01733899 | 9.78266684 | 1.49489053 | 64.0184471 | cg07048306 | 0.03208001 | 103.880884 | 1.48795333 | 7252.40362 |
| cg09149672 | 0.01734236 | 0.24749555 | 0.07834816 | 0.78181858 | cg20122491 | 0.03208757 | 119580.319 | 2.71880181 | 5259468621 |
| cg15177964 | 0.0173446  | 856.835003 | 3.28794468 | 223290.321 | cg23837756 | 0.03209361 | 212594.691 | 2.85485607 | 1.5831E+10 |
| cg06275813 | 0.01734575 | 22.9622188 | 1.73727204 | 303.500822 | cg04983381 | 0.03212235 | 234469380  | 5.18187377 | 1.0609E+16 |
| cg02304134 | 0.017354   | 353.550731 | 2.81183328 | 44454.314  | cg00901161 | 0.03212846 | 12.7653054 | 1.24273087 | 131.12495  |
| cg04457423 | 0.01735538 | 190.612804 | 2.52172119 | 14408.1119 | cg10296162 | 0.03213373 | 3089839.58 | 3.5776769  | 2.6685E+12 |
| cg06032048 | 0.01735918 | 6687.09895 | 4.71834496 | 9477325.77 | cg06380459 | 0.03213557 | 198355165  | 5.10156021 | 7.7123E+15 |
| cg09617296 | 0.01736241 | 4549017088 | 50.228189  | 4.1199E+17 | cg05586209 | 0.03213833 | 163.972669 | 1.54478895 | 17404.99   |
| cg25423888 | 0.01736316 | 14862.9664 | 5.42957663 | 40686002.9 | cg11330839 | 0.03214375 | 11661.0238 | 2.22168311 | 61205612.7 |
| cg15262352 | 0.01736437 | 1231.79706 | 3.50154379 | 433330.01  | cg11251498 | 0.03218227 | 13.8967476 | 1.25082783 | 154.393425 |
| cg23666930 | 0.01737659 | 496.932452 | 2.98256174 | 82795.2221 | cg11416076 | 0.03218417 | 9.23392027 | 1.20806475 | 70.5800609 |
| cg25580656 | 0.01737785 | 24.9397597 | 1.76141349 | 353.120726 | cg22276811 | 0.03218632 | 25.2255992 | 1.31579296 | 483.610169 |
| cg26023912 | 0.01738313 | 9.82134858 | 1.49482217 | 64.5286712 | cg21014483 | 0.03220135 | 6.17505128 | 1.16723655 | 32.6679782 |
| cg00986320 | 0.01738432 | 2674.49515 | 4.0091473  | 1784151.04 | cg01272428 | 0.03220556 | 126.002115 | 1.50787068 | 10529.1078 |
| cg06848185 | 0.01738778 | 5.27260661 | 1.33976327 | 20.7502184 | cg21037008 | 0.03220601 | 5.43942135 | 1.15467936 | 25.6238274 |
| cg09397246 | 0.01738998 | 6.26594352 | 1.38103062 | 28.4295277 | cg24403578 | 0.03220653 | 37.8820346 | 1.36154646 | 1053.98426 |
| cg11580525 | 0.01739614 | 16.62599   | 1.63946384 | 168.606063 | cg24214699 | 0.0322143  | 5.67504867 | 1.15875635 | 27.7937439 |
| cg11343211 | 0.01740133 | 4.06213793 | 1.27949749 | 12.8964415 | cg14122599 | 0.03222256 | 24.2013887 | 1.31036076 | 446.981651 |
| cg27625456 | 0.01740371 | 7.80535844 | 1.43514877 | 42.4510835 | cg24986868 | 0.03223415 | 26.3895694 | 1.3197522  | 527.681918 |

|            |            |            |            |            |            |            |            |            |            |
|------------|------------|------------|------------|------------|------------|------------|------------|------------|------------|
| cg24738356 | 0.01740618 | 0.14171463 | 0.0283145  | 0.70928462 | cg04110544 | 0.03225285 | 6.31898834 | 1.1689343  | 34.1589887 |
| cg16598292 | 0.0174074  | 8.4029218  | 1.45379974 | 48.5686528 | cg13003311 | 0.03225307 | 7.00597667 | 1.17919088 | 41.6249056 |
| cg19803043 | 0.0174194  | 152562368  | 27.4055282 | 8.4929E+14 | cg15684116 | 0.0322532  | 2042853.52 | 3.421925   | 1.2196E+12 |
| cg06468809 | 0.01742891 | 6.31771997 | 1.38230293 | 28.8747024 | cg14346208 | 0.03226937 | 5.82603746 | 1.16074398 | 29.2422043 |
| cg09038058 | 0.01743038 | 2247936.18 | 13.0467341 | 3.8732E+11 | cg02576345 | 0.03229313 | 4745.65763 | 2.04401315 | 11018161.1 |
| cg10706013 | 0.01743612 | 0.18105514 | 0.0442521  | 0.74077757 | cg24886176 | 0.0322986  | 2385.05314 | 1.92819291 | 2950160.46 |
| cg06046912 | 0.01744587 | 11.6229714 | 1.53804921 | 87.8342926 | cg00401745 | 0.03229914 | 4.80040102 | 1.14160529 | 20.1854793 |
| cg26358945 | 0.01744641 | 3157042781 | 46.4674655 | 2.1449E+17 | cg17711535 | 0.03230585 | 198274.104 | 2.79915162 | 1.4044E+10 |
| cg19792268 | 0.01745021 | 17.6302517 | 1.65457678 | 187.858174 | cg19856705 | 0.0323086  | 10.0444486 | 1.21488753 | 83.0455044 |
| cg12268958 | 0.01746093 | 28360.0897 | 6.039321   | 133176344  | cg02999463 | 0.03233956 | 17805.7648 | 2.2800151  | 139054018  |
| cg19007537 | 0.01746224 | 8752219605 | 55.4260727 | 1.382E+18  | cg01818648 | 0.03236233 | 1621.53034 | 1.86174044 | 1412313.22 |
| cg19907326 | 0.01746525 | 680.669789 | 3.139039   | 147596.561 | cg04971769 | 0.03236348 | 0.05739222 | 0.00418856 | 0.78639523 |
| cg24053664 | 0.01747133 | 5.64898865 | 1.35467616 | 23.5562371 | cg17679455 | 0.03236752 | 34956.46   | 2.40954786 | 507130038  |
| cg08856118 | 0.01747573 | 56.1415769 | 2.02594757 | 1555.75431 | cg05862007 | 0.03236786 | 0.18694585 | 0.04023935 | 0.86852177 |
| cg05995267 | 0.01748494 | 2545756.6  | 13.2565144 | 4.8888E+11 | cg19484886 | 0.03237949 | 209.759981 | 1.56682391 | 28081.8088 |
| cg20835282 | 0.01748601 | 6.18601212 | 1.37614773 | 27.8071497 | cg00620542 | 0.03238063 | 7915.28381 | 2.1253974  | 29477648.6 |
| cg06910925 | 0.01749003 | 43.0225674 | 1.93283985 | 957.627867 | cg03721058 | 0.03238446 | 18.1749553 | 1.27573424 | 258.932454 |
| cg26259537 | 0.017491   | 4.37248417 | 1.29491171 | 14.764418  | cg26032238 | 0.03238449 | 8.37127458 | 1.19533125 | 58.626626  |
| cg19484886 | 0.01750284 | 270.004922 | 2.66506011 | 27354.9769 | cg10096454 | 0.03238563 | 13.42864   | 1.24370064 | 144.993391 |
| cg06372962 | 0.01750549 | 5.69159288 | 1.35587202 | 23.8918047 | cg01501474 | 0.03239376 | 1.2312E+10 | 7.02756805 | 2.1569E+19 |
| cg18945601 | 0.01750778 | 12935750.9 | 17.5768648 | 9.5201E+12 | cg11594683 | 0.03242302 | 2.29E-05   | 1.28E-09   | 0.408603   |
| cg23031484 | 0.01751003 | 7.79573306 | 1.43254283 | 42.4234813 | cg02882448 | 0.03242523 | 18.9905039 | 1.27963217 | 281.830393 |
| cg23368715 | 0.01751338 | 29.8698072 | 1.81210593 | 492.358294 | cg07490151 | 0.03244604 | 9480.00495 | 2.15101779 | 41780451.2 |
| cg00599393 | 0.01751632 | 16568.8732 | 5.4744002  | 50147513.7 | cg05468346 | 0.0324474  | 30.6021723 | 1.33127108 | 703.457742 |
| cg26994413 | 0.01752421 | 0.16097768 | 0.03566926 | 0.72650269 | cg26980034 | 0.03245308 | 40.0075095 | 1.36129743 | 1175.79067 |
| cg26979537 | 0.01753165 | 7.30313076 | 1.41582362 | 37.6711606 | cg00501272 | 0.03246185 | 5.68227036 | 1.15624431 | 27.925064  |
| cg03557733 | 0.01753479 | 16.2337699 | 1.62797806 | 161.878892 | cg10542419 | 0.03246738 | 1.35E-11   | 1.47E-21   | 0.12356702 |
| cg07587786 | 0.01754091 | 0.09486819 | 0.01358475 | 0.66250577 | cg16489586 | 0.03247316 | 27.2848879 | 1.31796287 | 564.860458 |
| cg26360961 | 0.01754189 | 94.5205042 | 2.21477243 | 4033.87977 | cg22455694 | 0.03248335 | 16.5824711 | 1.26409032 | 217.530617 |
| cg03432814 | 0.01754818 | 9.16828723 | 1.47287944 | 57.0701774 | cg14539231 | 0.03249176 | 8.09047715 | 1.19049857 | 54.9818554 |

|            |            |            |            |            |            |            |            |            |            |
|------------|------------|------------|------------|------------|------------|------------|------------|------------|------------|
| cg27111463 | 0.01754911 | 8.38965681 | 1.45019052 | 48.5359272 | cg11479035 | 0.03250186 | 0.16279843 | 0.03083259 | 0.85958803 |
| cg01719529 | 0.01755031 | 1075.84315 | 3.38667961 | 341762.024 | cg10671946 | 0.03250797 | 9.61869963 | 1.20756878 | 76.6162427 |
| cg14908680 | 0.01755323 | 0.00017036 | 1.32E-07   | 0.21955333 | cg03840075 | 0.03251894 | 0.05686703 | 0.00410575 | 0.78764209 |
| cg03184011 | 0.01756055 | 728.906024 | 3.1623867  | 168007.281 | cg14252395 | 0.03252929 | 235.014709 | 1.57503128 | 35067.1852 |
| cg12525224 | 0.01756197 | 199332288  | 28.1564813 | 1.4112E+15 | cg25229048 | 0.03254115 | 0.11296221 | 0.01529708 | 0.8341761  |
| cg09336406 | 0.01756575 | 5.653744   | 1.35325575 | 23.6206802 | cg14415214 | 0.03255223 | 9.76E-07   | 3.01E-12   | 0.31666992 |
| cg02681400 | 0.01756793 | 13.3337488 | 1.57192454 | 113.102666 | cg09946603 | 0.03256388 | 0.00059629 | 6.59E-07   | 0.53986869 |
| cg19536127 | 0.01757861 | 55.2060678 | 2.01390162 | 1513.33605 | cg09730369 | 0.03256659 | 0.0784976  | 0.00761114 | 0.80958627 |
| cg12504804 | 0.01757982 | 243964.598 | 8.71427535 | 6830025741 | cg24516901 | 0.03259752 | 11.1218484 | 1.22087528 | 101.317074 |
| cg27093949 | 0.01758039 | 8.03256755 | 1.43852474 | 44.8529939 | cg00692933 | 0.03261741 | 465786804  | 5.21449807 | 4.1607E+16 |
| cg08781740 | 0.01758215 | 2387838175 | 43.3062946 | 1.3166E+17 | cg17029237 | 0.03262501 | 292.623488 | 1.59943079 | 53536.8619 |
| cg05884501 | 0.01758262 | 130.403147 | 2.33954029 | 7268.51371 | cg05022363 | 0.03262533 | 101365.013 | 2.59407159 | 3960902985 |
| cg14798020 | 0.01758626 | 0.09932393 | 0.01476051 | 0.66835383 | cg06733311 | 0.03264323 | 259.375129 | 1.58271116 | 42506.4658 |
| cg18412690 | 0.0175864  | 4874676.88 | 14.6859742 | 1.618E+12  | cg14849526 | 0.03266621 | 187369.166 | 2.72213945 | 1.2897E+10 |
| cg25197388 | 0.0175936  | 35.7586594 | 1.86616458 | 685.192363 | cg14165186 | 0.03267062 | 0.00010371 | 2.29E-08   | 0.46931293 |
| cg03478249 | 0.01759481 | 10.3688498 | 1.50369858 | 71.4990675 | cg04888113 | 0.03270662 | 47.4439638 | 1.37372648 | 1638.55742 |
| cg23927983 | 0.01759529 | 8691616.76 | 16.2283182 | 4.6551E+12 | cg27639104 | 0.03270708 | 0.00664216 | 6.66E-05   | 0.66198107 |
| cg00682096 | 0.01760856 | 7.11579391 | 1.40785143 | 35.9658141 | cg18464137 | 0.03271428 | 12.8280137 | 1.23345729 | 133.411944 |
| cg03982801 | 0.01762289 | 7.07267768 | 1.40607315 | 35.5762212 | cg16663533 | 0.03272844 | 9456511.02 | 3.74192566 | 2.3898E+13 |
| cg15747848 | 0.01762658 | 3368.31177 | 4.11550946 | 2756772.71 | cg05019913 | 0.03273577 | 729465871  | 5.34321904 | 9.9588E+16 |
| cg17703996 | 0.01763637 | 19631.0017 | 5.5906365  | 68932442.4 | cg02774070 | 0.03274381 | 8.8381E+11 | 9.56078126 | 8.17E+22   |
| cg14732540 | 0.01763793 | 8.95515117 | 1.46473281 | 54.7504171 | cg26616609 | 0.03274758 | 52.6388369 | 1.3843358  | 2001.57155 |
| cg17029237 | 0.01764064 | 239.773086 | 2.59586778 | 22147.173  | cg06467181 | 0.03275083 | 6278089771 | 6.36489036 | 6.1925E+18 |
| cg16907298 | 0.01764139 | 2262190441 | 42.5022581 | 1.2041E+17 | cg18294691 | 0.03275584 | 5.17081365 | 1.14424731 | 23.3667263 |
| cg25733934 | 0.01764817 | 161.510201 | 2.42263831 | 10767.4121 | cg23273694 | 0.03276517 | 5.95927862 | 1.15754147 | 30.6796798 |
| cg14685356 | 0.01764978 | 0.10152098 | 0.01534571 | 0.67162142 | cg04117301 | 0.03276675 | 3525.39091 | 1.9530226  | 6363664.78 |
| cg00473834 | 0.0176528  | 1.6368E+11 | 89.3655087 | 3.00E+20   | cg05676593 | 0.0327763  | 12630.6613 | 2.16731252 | 73608952.7 |
| cg20587127 | 0.01765544 | 1847571.88 | 12.3092674 | 2.7731E+11 | cg04380955 | 0.03278745 | 8.7663458  | 1.19444159 | 64.3386998 |
| cg10790723 | 0.01765939 | 195.259637 | 2.5029007  | 15232.856  | cg11703722 | 0.03279423 | 4024.55278 | 1.97196493 | 8213647.66 |
| cg22099236 | 0.01766672 | 1253546.78 | 11.492738  | 1.3673E+11 | cg15322516 | 0.0327988  | 8.38388445 | 1.18993748 | 59.0699256 |



|            |            |            |            |            |            |            |            |            |            |
|------------|------------|------------|------------|------------|------------|------------|------------|------------|------------|
| cg23135546 | 0.01766803 | 5.56811705 | 1.3479267  | 23.001197  | cg03459809 | 0.03280847 | 7.55370937 | 1.17971158 | 48.3665045 |
| cg05969021 | 0.01767073 | 5.5037E+11 | 109.969949 | 2.75E+21   | cg11784697 | 0.03281505 | 1.3216E+12 | 9.778911   | 1.79E+23   |
| cg02304201 | 0.01767408 | 11220.4832 | 5.05884486 | 24886954.6 | cg10514594 | 0.03282276 | 8216613.01 | 3.66984898 | 1.8397E+13 |
| cg10793756 | 0.01767755 | 5625140.95 | 14.9028073 | 2.1232E+12 | cg06209740 | 0.03283007 | 3315.68168 | 1.93799069 | 5672754.3  |
| cg16580499 | 0.01768139 | 3.49883503 | 1.2431581  | 9.84737708 | cg14892066 | 0.03284342 | 11413.2671 | 2.14231842 | 60804530.9 |
| cg09089417 | 0.01768237 | 3036442638 | 44.446364  | 2.0744E+17 | cg20502259 | 0.03284689 | 1436.14405 | 1.8088963  | 1140203.41 |
| cg10925082 | 0.01768292 | 4.79073029 | 1.31291565 | 17.4810139 | cg19937878 | 0.03285124 | 21661.8986 | 2.2563169  | 207966288  |
| cg23980468 | 0.01768911 | 6.23093403 | 1.37416118 | 28.2532642 | cg02284939 | 0.03285223 | 202.804255 | 1.54183014 | 26675.8088 |
| cg15084269 | 0.01768991 | 11.0057081 | 1.51689039 | 79.8512608 | cg09358240 | 0.03286756 | 2.2479E+10 | 6.96434085 | 7.2559E+19 |
| cg04941721 | 0.01769037 | 22.7444234 | 1.72074859 | 300.630087 | cg03119288 | 0.03286958 | 2975.69806 | 1.91776493 | 4617238.97 |
| cg05951609 | 0.01771113 | 4.93495622 | 1.31926803 | 18.4600796 | cg26552774 | 0.03287424 | 0.10555506 | 0.01337937 | 0.83276487 |
| cg07500988 | 0.01771122 | 54874182.2 | 22.045263  | 1.3659E+14 | cg09718640 | 0.03289315 | 535479.44  | 2.92203086 | 9.813E+10  |
| cg12811135 | 0.01771309 | 0.03036308 | 0.00169079 | 0.54525877 | cg10709343 | 0.03289471 | 273.233792 | 1.57777049 | 47317.8485 |
| cg23606286 | 0.01771419 | 212388044  | 27.8710318 | 1.6185E+15 | cg11780327 | 0.03289478 | 22741.5215 | 2.26008522 | 228830662  |
| cg05368724 | 0.01772275 | 11.9133703 | 1.53700833 | 92.340678  | cg04848925 | 0.03291036 | 16.1729476 | 1.25358033 | 208.653747 |
| cg05722148 | 0.01772308 | 751502.013 | 10.4561918 | 5.4012E+10 | cg01298678 | 0.03294954 | 8.67816768 | 1.19125886 | 63.2193361 |
| cg24848890 | 0.01772435 | 6.59316017 | 1.38704709 | 31.3397874 | cg14444703 | 0.03295335 | 300329.431 | 2.77675566 | 3.2483E+10 |
| cg01741932 | 0.01772494 | 603511230  | 33.3564877 | 1.0919E+16 | cg01932843 | 0.03296262 | 8.29E-05   | 1.47E-08   | 0.46743217 |
| cg06791405 | 0.01772552 | 64.5595567 | 2.06046454 | 2022.81393 | cg02375289 | 0.03297655 | 5.04437827 | 1.13978487 | 22.3250482 |
| cg15980914 | 0.01772553 | 0.01225317 | 0.0003222  | 0.46599123 | cg08378567 | 0.03298273 | 85.4898759 | 1.43263353 | 5101.45738 |
| cg19556079 | 0.01772576 | 122397.407 | 7.6303194  | 1963368024 | cg01826863 | 0.03299887 | 4.88704473 | 1.13665734 | 21.0117907 |
| cg11323985 | 0.01773666 | 11.5179397 | 1.52765645 | 86.8408173 | cg09834465 | 0.03300773 | 6.69472724 | 1.16580646 | 38.4449516 |
| cg18436984 | 0.01773816 | 13.6780881 | 1.57382524 | 118.87603  | cg06189038 | 0.03301259 | 24.2795837 | 1.29341117 | 455.770137 |
| cg22280792 | 0.01774131 | 57785.3713 | 6.69057354 | 499082645  | cg15623892 | 0.033033   | 191.784591 | 1.52718775 | 24084.3534 |
| cg20666917 | 0.01774785 | 17.0881007 | 1.63542076 | 178.549271 | cg05411944 | 0.03303346 | 0.0021426  | 7.53E-06   | 0.60953691 |
| cg03822267 | 0.01775408 | 20.8995315 | 1.693261   | 257.958117 | cg07405126 | 0.0330347  | 13737.663  | 2.15423638 | 87605699.6 |
| cg27508002 | 0.01775426 | 6.38052762 | 1.37862644 | 29.5302131 | cg25035631 | 0.03303568 | 4.6984449  | 1.13271315 | 19.4889451 |
| cg01726854 | 0.01775453 | 54363431.7 | 21.8865076 | 1.3503E+14 | cg02673986 | 0.03303824 | 17.7009352 | 1.2603706  | 248.596013 |
| cg16096311 | 0.01775456 | 6.45255881 | 1.38130484 | 30.1421626 | cg08940505 | 0.03306886 | 61.5944645 | 1.39258092 | 2724.35016 |
| cg06896857 | 0.01776258 | 3.6427E+12 | 149.826342 | 8.86E+22   | cg26247263 | 0.03306897 | 2968.61252 | 1.90141718 | 4634785.23 |

|            |            |            |            |            |            |            |            |            |            |
|------------|------------|------------|------------|------------|------------|------------|------------|------------|------------|
| cg15462247 | 0.01776353 | 847.362138 | 3.21447304 | 223371.789 | cg00311035 | 0.03307081 | 11.8103281 | 1.21944924 | 114.382662 |
| cg10383424 | 0.0177747  | 13.2782336 | 1.56467682 | 112.682367 | cg01389283 | 0.03307394 | 0.14104392 | 0.0232836  | 0.85439487 |
| cg02158880 | 0.0177794  | 10.9470362 | 1.51312645 | 79.1986689 | cg23076086 | 0.03309214 | 994.749493 | 1.74001194 | 568689.519 |
| cg15019790 | 0.01778162 | 14.9002495 | 1.59599067 | 139.109482 | cg01706263 | 0.03309453 | 0.0870746  | 0.00922228 | 0.82213785 |
| cg25077778 | 0.01778165 | 10.2956345 | 1.49708809 | 70.8041763 | cg20693334 | 0.03309481 | 10.7732032 | 1.21011406 | 95.9098918 |
| cg04948483 | 0.01778471 | 1656.43664 | 3.60604722 | 760883.64  | cg13284574 | 0.03310018 | 8.4350901  | 1.18652055 | 59.9658768 |
| cg13003311 | 0.01778535 | 6.42526013 | 1.37971697 | 29.9220554 | cg23696808 | 0.03310376 | 3419.2196  | 1.92028495 | 6088191.59 |
| cg03852670 | 0.0177884  | 8.87050437 | 1.45882544 | 53.937809  | cg20170271 | 0.03310773 | 11.2819316 | 1.21440284 | 104.810345 |
| cg25338254 | 0.01780706 | 10544.3451 | 4.95990054 | 22416420.2 | cg18189994 | 0.03310961 | 6.29952612 | 1.15895744 | 34.2411446 |
| cg25451082 | 0.01780761 | 18.9453934 | 1.66280508 | 215.856889 | cg17689707 | 0.03312246 | 4.74374975 | 1.13278677 | 19.8653112 |
| cg13989528 | 0.0178291  | 5840.01197 | 4.47209609 | 7626343.26 | cg21229079 | 0.03316153 | 7.45767493 | 1.17410035 | 47.3698141 |
| cg25153340 | 0.01783172 | 8740187.61 | 15.8038817 | 4.8337E+12 | cg20802616 | 0.03316233 | 7.49319884 | 1.17453617 | 47.8044272 |
| cg03877492 | 0.01783676 | 219.216156 | 2.53612667 | 18948.4712 | cg04904385 | 0.03316607 | 6.76627196 | 1.16495771 | 39.2996551 |
| cg19274820 | 0.01783903 | 335602.829 | 8.99473716 | 1.2522E+10 | cg19803043 | 0.03318044 | 51102987.9 | 4.12099728 | 6.3371E+14 |
| cg23363971 | 0.0178475  | 3.41307721 | 1.23597756 | 9.42500611 | cg10729312 | 0.03319393 | 0.10094793 | 0.01223434 | 0.83294108 |
| cg02060096 | 0.01785829 | 188655.697 | 8.12953423 | 4377984136 | cg26099580 | 0.03319935 | 23070.0611 | 2.22671785 | 239018931  |
| cg16645133 | 0.01786597 | 7.86507021 | 1.42712189 | 43.3455123 | cg03324851 | 0.03319972 | 349.778704 | 1.59475769 | 76717.0731 |
| cg02718824 | 0.01786702 | 736182.428 | 10.2730239 | 5.2756E+10 | cg26615259 | 0.0332007  | 200.639773 | 1.52563112 | 26386.6657 |
| cg09188212 | 0.01786846 | 8.748137   | 1.45349432 | 52.6523565 | cg21474786 | 0.03320538 | 9.6099028  | 1.19750132 | 77.1191067 |
| cg07701375 | 0.01787119 | 101485767  | 24.0091442 | 4.2898E+14 | cg23963351 | 0.0332067  | 1047050828 | 5.2287794  | 2.0967E+17 |
| cg27298243 | 0.0178731  | 5.73748709 | 1.35145005 | 24.3581019 | cg24274165 | 0.0332089  | 311179397  | 4.74605727 | 2.0403E+16 |
| cg09001028 | 0.01787955 | 322.517475 | 2.70611117 | 38438.0076 | cg05085816 | 0.03323847 | 49215.8435 | 2.36007529 | 1026322871 |
| cg05128038 | 0.01787957 | 1201475.67 | 11.1642472 | 1.293E+11  | cg24767968 | 0.03324618 | 6.85524151 | 1.16523339 | 40.3304065 |
| cg16458866 | 0.01788099 | 6.53227446 | 1.38186836 | 30.8789252 | cg26272575 | 0.03324658 | 49.254485  | 1.36283386 | 1780.11742 |
| cg16464045 | 0.0178877  | 23.8883637 | 1.72761586 | 330.312967 | cg23069367 | 0.03325021 | 5.21657438 | 1.14017988 | 23.8669781 |
| cg18236745 | 0.01788957 | 67232.0381 | 6.7869696  | 666003712  | cg01074928 | 0.03325277 | 242.055208 | 1.54630093 | 37890.8934 |
| cg25087487 | 0.01789231 | 7.85647048 | 1.4262924  | 43.2759289 | cg14379630 | 0.03326402 | 18151.773  | 2.17734709 | 151324915  |
| cg13356253 | 0.01789673 | 8.04626952 | 1.43207385 | 45.2088788 | cg24313303 | 0.03326474 | 8.65704564 | 1.18678734 | 63.1490047 |
| cg11991516 | 0.01790037 | 3.32735613 | 1.22999815 | 9.00106944 | cg05172655 | 0.03327886 | 0.06957618 | 0.00597967 | 0.80955016 |
| cg03852056 | 0.01790564 | 196816.536 | 8.15502562 | 4750046266 | cg05892930 | 0.03328767 | 51.6466543 | 1.36681975 | 1951.5206  |

|            |            |            |            |            |            |            |            |            |            |
|------------|------------|------------|------------|------------|------------|------------|------------|------------|------------|
| cg22593342 | 0.01790677 | 11.2004025 | 1.51574965 | 82.7636784 | cg14862722 | 0.03328816 | 0.14736104 | 0.02527237 | 0.85924984 |
| cg21155063 | 0.01791018 | 53474487.3 | 21.390655  | 1.3368E+14 | cg21823502 | 0.03329221 | 0.18582936 | 0.03945607 | 0.87521525 |
| cg18365406 | 0.01791405 | 4.48954551 | 1.29492163 | 15.5654353 | cg15658824 | 0.03329226 | 44.1484904 | 1.34980718 | 1443.97603 |
| cg04567307 | 0.01793256 | 8.04722823 | 1.43133053 | 45.2431363 | cg09667582 | 0.03329536 | 23.7354053 | 1.2850111  | 438.416029 |
| cg05191488 | 0.01793892 | 22406.2495 | 5.59646274 | 89706666.2 | cg07697561 | 0.0332992  | 60120.3202 | 2.38955757 | 1512603400 |
| cg02492791 | 0.01794471 | 8.22555532 | 1.43647005 | 47.1014067 | cg18486906 | 0.03330006 | 9.53206415 | 1.19539129 | 76.0087913 |
| cg07067280 | 0.01796049 | 4746005.37 | 14.0201488 | 1.6066E+12 | cg17667988 | 0.03330735 | 354634.992 | 2.74850329 | 4.5758E+10 |
| cg16003274 | 0.01796296 | 20789.0583 | 5.51532825 | 78360693.3 | cg20735720 | 0.03331762 | 14.1800684 | 1.23327088 | 163.041505 |
| cg08450280 | 0.01796977 | 13.1547102 | 1.55647787 | 111.178195 | cg02919799 | 0.03333374 | 41.8174923 | 1.34294331 | 1302.14184 |
| cg24868015 | 0.01797146 | 28.2778506 | 1.77497123 | 450.506928 | cg24701966 | 0.03333446 | 562097.156 | 2.84517149 | 1.1105E+11 |
| cg06220725 | 0.01797291 | 971.4465   | 3.25734216 | 289717.277 | cg12778476 | 0.03333918 | 5.65347261 | 1.1465627  | 27.8761489 |
| cg14952889 | 0.01797583 | 7.0663E+10 | 72.8281873 | 6.8562E+19 | cg04134731 | 0.03334703 | 3893.14012 | 1.92007897 | 7893706.58 |
| cg12468273 | 0.01797726 | 6.64419647 | 1.38409686 | 31.8946947 | cg13414916 | 0.03335263 | 219644971  | 4.55010342 | 1.0603E+16 |
| cg00147339 | 0.01797916 | 4385292.87 | 13.8026194 | 1.3933E+12 | cg23796713 | 0.03336955 | 0.02697372 | 0.0009672  | 0.75225698 |
| cg05711542 | 0.01799731 | 6107518361 | 47.6717773 | 7.8247E+17 | cg03786924 | 0.03337102 | 606.191037 | 1.65666206 | 221812.029 |
| cg27662454 | 0.01800117 | 11.6678729 | 1.5239048  | 89.3358026 | cg03289681 | 0.03337684 | 59.9761721 | 1.38047315 | 2605.73067 |
| cg09365002 | 0.0180037  | 0.17544413 | 0.04148317 | 0.74200315 | cg02006107 | 0.03337858 | 8.67599107 | 1.18546984 | 63.4961923 |
| cg09962502 | 0.01804224 | 16064.8245 | 5.2473611  | 49182547.3 | cg00930615 | 0.0333795  | 222.074344 | 1.53027727 | 32227.5024 |
| cg27610178 | 0.01804444 | 11354.9273 | 4.94404209 | 26078737.1 | cg10663408 | 0.03339283 | 0.00719373 | 7.63E-05   | 0.67826477 |
| cg10560079 | 0.01804646 | 649.791895 | 3.02964111 | 139366.179 | cg16749785 | 0.03340346 | 0.05546115 | 0.0038612  | 0.7966269  |
| cg07245678 | 0.01805216 | 33.8034819 | 1.82646307 | 625.62195  | cg05896563 | 0.03344053 | 3.2622E+12 | 9.58004122 | 1.11E+24   |
| cg11872076 | 0.01805369 | 43253.1205 | 6.21138563 | 301194056  | cg01289902 | 0.03344096 | 140446.289 | 2.53326375 | 7786461318 |
| cg14865516 | 0.01805715 | 276360.751 | 8.52827506 | 8955534837 | cg16018130 | 0.03344803 | 687615.755 | 2.86789796 | 1.6486E+11 |
| cg27549166 | 0.01807181 | 1119330558 | 35.2396158 | 3.5554E+16 | cg03496709 | 0.03345849 | 11.1246216 | 1.20769332 | 102.474034 |
| cg03970032 | 0.01808215 | 8.60997381 | 1.44470989 | 51.3124812 | cg07491796 | 0.0334682  | 113.5787   | 1.44840355 | 8906.44119 |
| cg02013781 | 0.01808867 | 5.30674864 | 1.32993543 | 21.1751491 | cg12563239 | 0.03348479 | 2081.59021 | 1.81751785 | 2384030.4  |
| cg00994896 | 0.01809186 | 16063.6893 | 5.22920099 | 49346375.4 | cg21287489 | 0.03348597 | 38.5368295 | 1.33044306 | 1116.23509 |
| cg00982136 | 0.01809639 | 4.38341166 | 1.28710024 | 14.9283616 | cg09904774 | 0.0334899  | 2217.72065 | 1.82616876 | 2693225.84 |
| cg07408835 | 0.01809886 | 0.03521774 | 0.00219629 | 0.5647203  | cg27248189 | 0.03350174 | 19.4149825 | 1.26069758 | 298.994424 |
| cg08199758 | 0.018101   | 6.11267457 | 1.36223183 | 27.4290981 | cg09942293 | 0.03351164 | 24.0565253 | 1.28177273 | 451.496894 |

|            |            |            |            |            |            |            |            |            |            |
|------------|------------|------------|------------|------------|------------|------------|------------|------------|------------|
| cg26737948 | 0.0181039  | 0.05433813 | 0.00485475 | 0.60819409 | cg15377585 | 0.03351328 | 7.00247866 | 1.16404084 | 42.1245592 |
| cg05155781 | 0.01811123 | 15613533.1 | 16.8958666 | 1.4429E+13 | cg25522149 | 0.03352753 | 76.8173246 | 1.40285251 | 4206.35905 |
| cg04401646 | 0.01811353 | 14451.6833 | 5.12793549 | 40728116   | cg11057378 | 0.03352772 | 15093.14   | 2.11749068 | 107581524  |
| cg20739396 | 0.01812347 | 7496.28736 | 4.58157708 | 12265279.7 | cg19813688 | 0.03353809 | 5.08E-08   | 9.57E-15   | 0.27020446 |
| cg20919942 | 0.01813611 | 7.6686737  | 1.41528958 | 41.5523134 | cg02418535 | 0.03355071 | 194.640442 | 1.50736565 | 25133.1863 |
| cg26617787 | 0.01813877 | 11.1797583 | 1.50917061 | 82.8183334 | cg03553278 | 0.03355997 | 5.28061913 | 1.13822144 | 24.4986937 |
| cg01119072 | 0.01813877 | 39.6310298 | 1.87255867 | 838.755309 | cg05797937 | 0.03356273 | 141.338924 | 1.46982331 | 13591.2195 |
| cg23793040 | 0.01813903 | 5.95276424 | 1.35541965 | 26.1434916 | cg02699635 | 0.03356517 | 493.798742 | 1.61991568 | 150524.624 |
| cg24174608 | 0.01813929 | 123.787256 | 2.27381274 | 6739.02669 | cg04528060 | 0.033571   | 3.43863296 | 1.10078227 | 10.7416306 |
| cg14965353 | 0.01814023 | 12136853.1 | 16.1300149 | 9.1322E+12 | cg14323910 | 0.03360924 | 0.33975224 | 0.12551085 | 0.91969403 |
| cg01826858 | 0.01814781 | 180.451187 | 2.42393685 | 13433.7785 | cg16621987 | 0.03361129 | 1309.47379 | 1.74456114 | 982895.679 |
| cg18413449 | 0.01816583 | 6.62511513 | 1.3798725  | 31.8088449 | cg23710492 | 0.03361151 | 26.9014374 | 1.29079397 | 560.652864 |
| cg17244462 | 0.01817119 | 650905.387 | 9.76665977 | 4.338E+10  | cg03059073 | 0.03361175 | 0.1458818  | 0.024707   | 0.86135515 |
| cg13842258 | 0.01819107 | 7141827269 | 47.4459045 | 1.075E+18  | cg12564291 | 0.03364156 | 3.5837E+12 | 9.3633726  | 1.37E+24   |
| cg13891121 | 0.01819122 | 35.2463289 | 1.83304311 | 677.727487 | cg21644826 | 0.03364874 | 4449168.52 | 3.26726617 | 6.0586E+12 |
| cg07177860 | 0.01820532 | 25.7555841 | 1.73721938 | 381.845909 | cg25262261 | 0.03365867 | 0.11411684 | 0.01540126 | 0.84555746 |
| cg12938159 | 0.0182063  | 6.4635586  | 1.37334057 | 30.4204147 | cg19257562 | 0.03369128 | 45.0669935 | 1.34136042 | 1514.15971 |
| cg14761923 | 0.01820886 | 2000.29331 | 3.64013448 | 1099182.83 | cg05864627 | 0.03370947 | 0.05704611 | 0.00405746 | 0.80204302 |
| cg24720717 | 0.01821364 | 3.18917646 | 1.21786092 | 8.35140227 | cg05485462 | 0.03371641 | 13.932146  | 1.22483432 | 158.474243 |
| cg22534509 | 0.01821379 | 9.0438366  | 1.45387261 | 56.2573226 | cg06949933 | 0.03371803 | 8.52352958 | 1.17934279 | 61.6025784 |
| cg19808978 | 0.01822464 | 4.12881794 | 1.27235425 | 13.3981063 | cg22770592 | 0.03372571 | 10041.2175 | 2.0318995  | 49621572.5 |
| cg01574381 | 0.01822512 | 4249103.23 | 13.3629302 | 1.3511E+12 | cg24745816 | 0.03372629 | 5.41217419 | 1.13873917 | 25.722861  |
| cg00503383 | 0.01822604 | 5.99880505 | 1.35568638 | 26.5442382 | cg08315174 | 0.03372673 | 26.150724  | 1.28545045 | 532.000564 |
| cg13303952 | 0.01822892 | 238330.028 | 8.18911803 | 6936180648 | cg00123512 | 0.03373289 | 118417896  | 4.17712307 | 3.357E+15  |
| cg25285053 | 0.01822977 | 0.15635933 | 0.03350497 | 0.72968992 | cg24354901 | 0.03375631 | 28649.1597 | 2.19901124 | 373247003  |
| cg17217295 | 0.01823111 | 8922.62644 | 4.68676102 | 16986840.6 | cg24129382 | 0.03375648 | 5.64381836 | 1.14210719 | 27.8894012 |
| cg02348830 | 0.01823275 | 50442.7553 | 6.28889493 | 404597563  | cg14927519 | 0.03375819 | 7.90165817 | 1.17197988 | 53.2741243 |
| cg15583193 | 0.01823484 | 0.1744826  | 0.04094961 | 0.74345475 | cg11884274 | 0.03376412 | 11.9252965 | 1.20951216 | 117.578558 |
| cg25923056 | 0.01823627 | 10.9439045 | 1.50118411 | 79.7830487 | cg19659689 | 0.03376587 | 427.679671 | 1.59181647 | 114906.4   |
| cg05232889 | 0.01824766 | 6.68028511 | 1.38028602 | 32.3311316 | cg19691267 | 0.03376775 | 1373948.69 | 2.95749215 | 6.3829E+11 |

|            |            |            |            |            |            |            |            |            |            |
|------------|------------|------------|------------|------------|------------|------------|------------|------------|------------|
| cg26672088 | 0.01825158 | 57637895   | 20.7390132 | 1.6019E+14 | cg02913948 | 0.03378517 | 129131005  | 4.18378534 | 3.9856E+15 |
| cg04683119 | 0.01825317 | 106405.97  | 7.12667186 | 1588712180 | cg18101225 | 0.03378669 | 18.7857091 | 1.25200688 | 281.869751 |
| cg02817981 | 0.0182579  | 9.29496577 | 1.45962878 | 59.1906586 | cg26896499 | 0.03379291 | 71.0486722 | 1.38616611 | 3641.63701 |
| cg07187103 | 0.01826434 | 10210977.7 | 15.4388512 | 6.7534E+12 | cg00658394 | 0.03381019 | 63.5732064 | 1.37390156 | 2941.66095 |
| cg06206902 | 0.0182644  | 5.32502657 | 1.32791771 | 21.3536635 | cg03541791 | 0.03381178 | 741.086689 | 1.65779026 | 331290.088 |
| cg13596049 | 0.01827135 | 32.4830428 | 1.80415902 | 584.842054 | cg01815671 | 0.03381749 | 4.81920072 | 1.12777818 | 20.5933189 |
| cg10561989 | 0.01827462 | 12.2759999 | 1.52969558 | 98.516447  | cg22760295 | 0.03382269 | 132751.755 | 2.46374244 | 7152950773 |
| cg05281894 | 0.01827552 | 8.83434786 | 1.44670179 | 53.9473325 | cg24174608 | 0.03382854 | 166.373417 | 1.47811414 | 18726.6416 |
| cg11449372 | 0.01827686 | 232.844542 | 2.51884354 | 21524.3939 | cg18927077 | 0.03382947 | 11.8756645 | 1.20811145 | 116.737084 |
| cg14961031 | 0.01827696 | 48.5454635 | 1.93103109 | 1220.41641 | cg23445859 | 0.03383805 | 4.34478885 | 1.11870163 | 16.8741956 |
| cg06646636 | 0.01827839 | 27.2676969 | 1.75112318 | 424.600224 | cg03512414 | 0.03384071 | 10.7650825 | 1.19891665 | 96.6597651 |
| cg14441271 | 0.01827947 | 9.30234182 | 1.45932366 | 59.2970329 | cg10561989 | 0.03384246 | 14.3061426 | 1.22520138 | 167.046594 |
| cg21436938 | 0.01828513 | 11.1190684 | 1.50397122 | 82.2048188 | cg07343367 | 0.03384389 | 55047.4722 | 2.30065593 | 1317113160 |
| cg14157855 | 0.01828611 | 15.8639009 | 1.59728293 | 157.557154 | cg08290108 | 0.03384659 | 1065.21963 | 1.70230176 | 666563.871 |
| cg02515030 | 0.01829069 | 342.090493 | 2.68700829 | 43552.4914 | cg16581360 | 0.03385808 | 1006011.81 | 2.86897203 | 3.5276E+11 |
| cg01347529 | 0.01830428 | 13.7528488 | 1.55857171 | 121.355244 | cg06485521 | 0.03386246 | 191.784573 | 1.49287429 | 24637.9234 |
| cg14520423 | 0.01831382 | 103.009829 | 2.19097692 | 4843.05642 | cg23739036 | 0.03386825 | 6.62E-09   | 1.84E-16   | 0.23808245 |
| cg05861291 | 0.01831927 | 10.3168507 | 1.48416542 | 71.7153273 | cg20902195 | 0.03389807 | 27047516.5 | 3.67446657 | 1.991E+14  |
| cg07378350 | 0.01832122 | 11.571752  | 1.51321981 | 88.4904123 | cg14042889 | 0.03390065 | 6.35478411 | 1.15096743 | 35.0863804 |
| cg04108127 | 0.01832254 | 8644.18175 | 4.63408023 | 16124424.8 | cg22573528 | 0.03390476 | 0.28833688 | 0.09138079 | 0.90979905 |
| cg08219218 | 0.01832262 | 0.00516557 | 6.50E-05   | 0.41033305 | cg03939371 | 0.03390809 | 6884.69835 | 1.95732194 | 24216287.7 |
| cg06164260 | 0.01832889 | 64.259443  | 2.02190769 | 2042.26733 | cg13075709 | 0.03391611 | 8036302.62 | 3.34554468 | 1.9304E+13 |
| cg09232851 | 0.01832992 | 0.15966393 | 0.03476665 | 0.73324793 | cg23736297 | 0.03393985 | 43.3793752 | 1.33093563 | 1413.87017 |
| cg14373380 | 0.01833152 | 1264.69821 | 3.34622518 | 477989.818 | cg09180877 | 0.03393991 | 0.12879966 | 0.01937873 | 0.85605979 |
| cg03304714 | 0.01833787 | 8.4851E+11 | 103.903821 | 6.93E+21   | cg01191114 | 0.03394056 | 45888.5187 | 2.2567595  | 933088418  |
| cg17163363 | 0.01834168 | 226.169241 | 2.5001782  | 20459.5519 | cg18444267 | 0.03395527 | 21.7025139 | 1.26253213 | 373.059107 |
| cg04897244 | 0.01834382 | 36769.7981 | 5.91068156 | 228741481  | cg19971773 | 0.03397199 | 416.34398  | 1.57833969 | 109825.73  |
| cg15195412 | 0.0183446  | 15.5694507 | 1.59039756 | 152.419622 | cg24810594 | 0.03397971 | 2.9741E+10 | 6.19507266 | 1.43E+20   |
| cg15641348 | 0.01835366 | 215.250032 | 2.47821696 | 18695.9323 | cg21810188 | 0.03398807 | 4.38752958 | 1.11825295 | 17.214724  |
| cg20053110 | 0.01835512 | 4.41970926 | 1.28537367 | 15.1970049 | cg16421340 | 0.03398894 | 14.9228821 | 1.22663812 | 181.546952 |

|            |            |            |            |            |            |            |            |            |            |
|------------|------------|------------|------------|------------|------------|------------|------------|------------|------------|
| cg09497409 | 0.01835825 | 7.0109256  | 1.38951076 | 35.3743771 | cg08376992 | 0.03399663 | 246.41942  | 1.51586606 | 40057.9789 |
| cg00013451 | 0.01835892 | 23.6265687 | 1.70599537 | 327.207658 | cg23694882 | 0.03400804 | 61.9984912 | 1.36548196 | 2814.98623 |
| cg24208206 | 0.01836141 | 929.948277 | 3.17206832 | 272630.887 | cg06349174 | 0.03402622 | 23614276.4 | 3.59602006 | 1.5507E+14 |
| cg09600247 | 0.01838224 | 240.257549 | 2.52184864 | 22889.4348 | cg19292008 | 0.03402792 | 7.15344783 | 1.15987077 | 44.1185495 |
| cg24809270 | 0.01838474 | 6.1317E+10 | 66.0876491 | 5.689E+19  | cg15342134 | 0.03403775 | 8.27690315 | 1.17256841 | 58.4248432 |
| cg22254127 | 0.01838531 | 2.736E+12  | 125.42564  | 5.97E+22   | cg02783970 | 0.03404954 | 831093472  | 4.69166461 | 1.4722E+17 |
| cg14781919 | 0.01838705 | 2.0536E+13 | 176.164003 | 2.39E+24   | cg06874326 | 0.03405517 | 298.857111 | 1.53546836 | 58168.2926 |
| cg21988950 | 0.01838787 | 0.18579316 | 0.04585378 | 0.75280808 | cg11258089 | 0.0340701  | 6.14953868 | 1.14627154 | 32.9911584 |
| cg09877947 | 0.01838943 | 9.36034063 | 1.45830218 | 60.0808101 | cg20579480 | 0.03407442 | 10.2607777 | 1.19117436 | 88.3863542 |
| cg26795340 | 0.01839406 | 8.40612184 | 1.43198964 | 49.3459468 | cg12446939 | 0.03408168 | 959.12209  | 1.67468127 | 549307.622 |
| cg19946982 | 0.01839566 | 21.7629917 | 1.68112836 | 281.732091 | cg15145873 | 0.0340886  | 26.067932  | 1.2773086  | 532.00697  |
| cg22412649 | 0.01839801 | 8.54522634 | 1.43587242 | 50.8547224 | cg23127201 | 0.03409498 | 357380.309 | 2.6100353  | 4.8934E+10 |
| cg21211321 | 0.01839815 | 0.21892324 | 0.06191975 | 0.7740242  | cg05852040 | 0.0341127  | 65.5623649 | 1.36815614 | 3141.764   |
| cg21606036 | 0.0184053  | 10.6554326 | 1.49013367 | 76.1933289 | cg23734074 | 0.03411413 | 60804.8681 | 2.28276565 | 1619628358 |
| cg04206724 | 0.01841198 | 1650.25255 | 3.48540517 | 781353.484 | cg11005899 | 0.03411578 | 26987929.3 | 3.6037569  | 2.0211E+14 |
| cg20311863 | 0.01841466 | 4.82752675 | 1.30381204 | 17.87452   | cg03216729 | 0.03412803 | 176557.698 | 2.47043671 | 1.2618E+10 |
| cg06580065 | 0.01841509 | 15242.0317 | 5.06844781 | 45836425.5 | cg25413906 | 0.03412999 | 40410215.5 | 3.70965162 | 4.402E+14  |
| cg11073923 | 0.01841958 | 5233.50201 | 4.23181476 | 6472292.59 | cg08450280 | 0.03413108 | 11.9784398 | 1.20423263 | 119.148923 |
| cg04981940 | 0.01842128 | 8.51303678 | 1.4344503  | 50.5223465 | cg01117697 | 0.03414328 | 15.1838989 | 1.2255852  | 188.11486  |
| cg02025938 | 0.01842302 | 632951.552 | 9.48961585 | 4.2217E+10 | cg20984085 | 0.03415283 | 4.76128019 | 1.12369014 | 20.1744131 |
| cg16774354 | 0.01842745 | 114.296881 | 2.22133391 | 5881.05055 | cg23778358 | 0.03415981 | 0.21731456 | 0.05292897 | 0.89224525 |
| cg02999463 | 0.01842765 | 78832.8896 | 6.67875588 | 930506309  | cg04340651 | 0.03416279 | 6.9491076  | 1.15577805 | 41.781462  |
| cg00364457 | 0.0184305  | 22.0968366 | 1.68415763 | 289.919531 | cg22669260 | 0.03417689 | 202353755  | 4.16570262 | 9.8296E+15 |
| cg13731133 | 0.01843346 | 141.984134 | 2.30349814 | 8751.68678 | cg05085336 | 0.03419109 | 0.15269553 | 0.02682159 | 0.86929681 |
| cg25100532 | 0.01844408 | 46366471.9 | 19.5089716 | 1.102E+14  | cg10104451 | 0.03419748 | 26.0238284 | 1.27480933 | 531.247795 |
| cg04667246 | 0.01844697 | 5.9168E+10 | 64.9737713 | 5.3881E+19 | cg02917792 | 0.03420931 | 59155038.4 | 3.78913286 | 9.2351E+14 |
| cg14923274 | 0.01845251 | 133303.051 | 7.28135192 | 2440440131 | cg11803389 | 0.03423377 | 10.8643927 | 1.19395685 | 98.8603797 |
| cg14140118 | 0.01845328 | 6.92776443 | 1.38489946 | 34.6551655 | cg03003689 | 0.03423412 | 5980.36615 | 1.9083283  | 18741418.5 |
| cg20696432 | 0.01845768 | 12.1519759 | 1.52209953 | 97.0176488 | cg16198723 | 0.03423619 | 11.5927042 | 1.19969119 | 112.021153 |
| cg14443362 | 0.01846091 | 29.9914407 | 1.77175839 | 507.680124 | cg25446197 | 0.03425996 | 1674788.66 | 2.89521398 | 9.6881E+11 |

|             |            |            |            |            |            |            |            |            |            |
|-------------|------------|------------|------------|------------|------------|------------|------------|------------|------------|
| cg02400092  | 0.01846237 | 20.554385  | 1.66262155 | 254.106379 | cg19630883 | 0.03426255 | 494839.714 | 2.64440434 | 9.2598E+10 |
| cg04478075  | 0.01846661 | 6.59590219 | 1.37326413 | 31.6806687 | cg26833120 | 0.03428448 | 11.617445  | 1.19914911 | 112.550663 |
| cg15734651  | 0.0184742  | 45.8698149 | 1.90231403 | 1106.04237 | cg12552766 | 0.0343082  | 1969658.57 | 2.91971895 | 1.3287E+12 |
| cg02480298  | 0.01848102 | 15.354774  | 1.58246998 | 148.988029 | cg05768582 | 0.03431814 | 57433.3413 | 2.24697855 | 1468010759 |
| cg21016004  | 0.01848471 | 72.9101419 | 2.0557616  | 2585.84887 | cg27022535 | 0.03432609 | 0.01290769 | 0.00022971 | 0.72528723 |
| cg26572207  | 0.01849563 | 7.80258527 | 1.4120126  | 43.116001  | cg12525224 | 0.0343568  | 58761383   | 3.73612438 | 9.2419E+14 |
| cg01724067  | 0.01849611 | 41923.59   | 5.97392285 | 294209926  | cg22896904 | 0.03437891 | 8.7093E+17 | 20.8816218 | 3.63E+34   |
| cg21491013  | 0.01849856 | 0.13446594 | 0.02532465 | 0.71397193 | cg04228628 | 0.0343875  | 7741.57207 | 1.93157704 | 31027464.6 |
| cg111177450 | 0.0185097  | 1381.33293 | 3.36553636 | 566946.973 | cg15578015 | 0.03439089 | 1780.30091 | 1.73350084 | 1828364.45 |
| cg06408864  | 0.01851485 | 24214784.7 | 17.3397694 | 3.3816E+13 | cg10685559 | 0.03439533 | 3.95E-05   | 3.28E-09   | 0.47468551 |
| cg26465611  | 0.01851801 | 10.3068163 | 1.47903613 | 71.8241163 | cg16039972 | 0.03439662 | 0.00023029 | 9.81E-08   | 0.54040552 |
| cg24121733  | 0.01851826 | 10.8552316 | 1.49195055 | 78.9812062 | cg13736376 | 0.03442268 | 9.16088939 | 1.17638359 | 71.3388858 |
| cg01910481  | 0.01852038 | 0.11806432 | 0.01994797 | 0.69877706 | cg07207726 | 0.03447788 | 145.662004 | 1.43895446 | 14745.025  |
| cg08236022  | 0.01852208 | 6.35787945 | 1.3638104  | 29.6394801 | cg08402572 | 0.03448109 | 1600.47099 | 1.71411144 | 1494364.56 |
| cg22324029  | 0.01852217 | 15.9398695 | 1.59115907 | 159.681986 | cg26247841 | 0.0344926  | 5.20565394 | 1.12794822 | 24.024891  |
| cg20890243  | 0.01852277 | 21.6708288 | 1.67526646 | 280.328432 | cg04422150 | 0.03450549 | 0.02079823 | 0.00057371 | 0.75397863 |
| cg12149795  | 0.01852981 | 9.90305187 | 1.46887093 | 66.7658639 | cg24476497 | 0.03452311 | 0.07416366 | 0.00664753 | 0.82741294 |
| cg22731763  | 0.01853278 | 0.04361027 | 0.00321574 | 0.59142128 | cg23061725 | 0.03452488 | 7.93516227 | 1.16279056 | 54.1514547 |
| cg20940164  | 0.01853351 | 2347280.1  | 11.6985858 | 4.7097E+11 | cg22270364 | 0.03452608 | 5.15402883 | 1.12681037 | 23.5745197 |
| cg21267231  | 0.01854246 | 23.4768913 | 1.69716534 | 324.755881 | cg21534578 | 0.03453632 | 14.7863915 | 1.21650869 | 179.725288 |
| cg00014272  | 0.01854758 | 19718.6624 | 5.24421931 | 74143666.6 | cg19430489 | 0.03455636 | 4.29870702 | 1.11176859 | 16.6211587 |
| cg21045608  | 0.01854799 | 10.8516333 | 1.49111812 | 78.9729161 | cg26594902 | 0.03456629 | 2864880.82 | 2.94309291 | 2.7887E+12 |
| cg03656968  | 0.01855186 | 6.53004532 | 1.36939448 | 31.1389396 | cg10330832 | 0.03457169 | 306054.799 | 2.50110806 | 3.7451E+10 |
| cg18580265  | 0.01855895 | 23.1494287 | 1.69255345 | 316.619868 | cg06550200 | 0.03457889 | 48.8232757 | 1.32583633 | 1797.8933  |
| cg09488991  | 0.0185612  | 39797280.1 | 18.7392932 | 8.4519E+13 | cg10626541 | 0.03458616 | 5.0469E+12 | 8.33644084 | 3.06E+24   |
| cg09386303  | 0.01856469 | 21.7827191 | 1.67518051 | 283.245207 | cg02067788 | 0.03458742 | 100014.038 | 2.30396783 | 4341557070 |
| cg24168884  | 0.01857072 | 19.8819393 | 1.6495534  | 239.635474 | cg01239651 | 0.03461599 | 14.8128052 | 1.21532696 | 180.543348 |
| cg15371881  | 0.01858416 | 9.77011805 | 1.46426073 | 65.190034  | cg20313969 | 0.03461777 | 8.07537351 | 1.163116   | 56.0663402 |
| cg03133987  | 0.01858539 | 30.8915375 | 1.7752087  | 537.563323 | cg14980255 | 0.03461931 | 54.633527  | 1.33558617 | 2234.84065 |
| cg05986853  | 0.0185877  | 7.99376089 | 1.41584303 | 45.1322722 | cg04117874 | 0.03462891 | 4.8568E+12 | 8.26017934 | 2.86E+24   |

|            |            |            |            |            |
|------------|------------|------------|------------|------------|
| cg16884841 | 0.01858939 | 25.5314954 | 1.71934656 | 379.130812 |
| cg09409956 | 0.01859679 | 5.87324882 | 1.34453156 | 25.655814  |
| cg02317397 | 0.01859969 | 0.05712785 | 0.00526682 | 0.6196508  |
| cg19459508 | 0.01860188 | 3.5225E+12 | 125.204345 | 9.91E+22   |
| cg21997510 | 0.01860333 | 0.17066291 | 0.03914205 | 0.74410578 |
| cg24032330 | 0.01860759 | 0.02419652 | 0.00109056 | 0.53685427 |
| cg00326908 | 0.01862128 | 65.9007559 | 2.01297261 | 2157.46086 |
| cg01059295 | 0.01862527 | 0.14997106 | 0.03087707 | 0.72841496 |
| cg08190044 | 0.01862699 | 12.2729975 | 1.52005958 | 99.0924751 |
| cg02466544 | 0.01863108 | 31.9525189 | 1.78326912 | 572.523493 |
| cg02722618 | 0.01863484 | 7.94E-05   | 3.05E-08   | 0.20676306 |
| cg10370375 | 0.01863765 | 0.04753679 | 0.00375754 | 0.60139047 |
| cg16829809 | 0.01863822 | 19.7088469 | 1.64479808 | 236.161904 |
| cg08938402 | 0.0186384  | 7.0372E+13 | 204.867617 | 2.42E+25   |
| cg23167594 | 0.01864302 | 7.73942541 | 1.40707891 | 42.5695427 |
| cg13850380 | 0.01864885 | 7.51341516 | 1.40002007 | 40.3218558 |
| cg25424488 | 0.01865538 | 165494.331 | 7.42194755 | 3690186910 |
| cg13997647 | 0.01865887 | 1.9965E+11 | 76.6763506 | 5.20E+20   |
| cg12768250 | 0.01866037 | 647382192  | 29.4735976 | 1.422E+16  |
| cg26397391 | 0.01866128 | 65.3041693 | 2.00754476 | 2124.30358 |
| cg05019913 | 0.01866147 | 111342810  | 21.9722984 | 5.6422E+14 |
| cg09257092 | 0.01866305 | 2981649.27 | 12.0121172 | 7.4011E+11 |
| cg03924800 | 0.01867368 | 2215066.4  | 11.4188134 | 4.2969E+11 |
| cg00172803 | 0.01867494 | 11.6674107 | 1.50601445 | 90.389885  |
| cg06390536 | 0.01868818 | 4.0164845  | 1.26062129 | 12.7969818 |
| cg05434115 | 0.01868925 | 20.0697615 | 1.64800654 | 244.413671 |
| cg26724572 | 0.01869012 | 0.0194162  | 0.00072686 | 0.51865361 |
| cg19528963 | 0.01869136 | 6.89816893 | 1.37940504 | 34.4965642 |
| cg24313303 | 0.01869674 | 8.07026077 | 1.41582149 | 46.0009326 |
| cg08172787 | 0.01869696 | 4.4864E+11 | 87.131155  | 2.31E+21   |

|              |            |            |            |            |
|--------------|------------|------------|------------|------------|
| cg19430553   | 0.03463024 | 6.7056837  | 1.14744271 | 39.1881819 |
| cg24938064   | 0.03464476 | 737.679218 | 1.61087214 | 337811.185 |
| cg24908234   | 0.03464535 | 1871552.4  | 2.83684968 | 1.2347E+12 |
| cg15734651   | 0.03467225 | 61.5117693 | 1.34558599 | 2811.93309 |
| cg11601666   | 0.03469385 | 1291321.02 | 2.75221172 | 6.0588E+11 |
| cg09299055   | 0.03469448 | 7.15278909 | 1.15206179 | 44.4094165 |
| cg06530441   | 0.03469464 | 5.50625203 | 1.13057855 | 26.8170763 |
| cg15787985   | 0.03469955 | 21.3561417 | 1.24628915 | 365.954232 |
| cg16908156   | 0.03470168 | 1768.41631 | 1.71210246 | 1826582.42 |
| cg24129356   | 0.03470897 | 7.25162658 | 1.15303029 | 45.6068574 |
| cg00028034   | 0.03471377 | 15.6616202 | 1.2185552  | 201.292766 |
| ch.12.262555 | 0.03471543 | 4.89E-05   | 4.87E-09   | 0.49012405 |
| cg22942704   | 0.03471624 | 88.2392749 | 1.37963756 | 5643.63415 |
| cg09455126   | 0.03472421 | 0.13662751 | 0.02153471 | 0.86683687 |
| cg19046253   | 0.03473105 | 50.4698928 | 1.32497229 | 1922.46291 |
| cg15395193   | 0.03473848 | 1903080051 | 4.6294088  | 7.8233E+17 |
| cg17176108   | 0.03475182 | 5606.47537 | 1.85609892 | 16934747.2 |
| cg09788352   | 0.03476056 | 161.54489  | 1.43922883 | 18132.4547 |
| cg22361075   | 0.03478664 | 34707.6482 | 2.11116163 | 570596217  |
| cg17513770   | 0.03479136 | 0.08758523 | 0.00912903 | 0.84030515 |
| cg08039823   | 0.03479218 | 1.2974E+11 | 6.2226975  | 2.70E+21   |
| cg17453374   | 0.03480247 | 21.1442417 | 1.24339529 | 359.563012 |
| cg00131758   | 0.03481365 | 11.0157024 | 1.18667738 | 102.256689 |
| cg10548700   | 0.03482024 | 0.00075866 | 9.61E-07   | 0.59915765 |
| cg03221676   | 0.03483241 | 5.7905E+10 | 5.84430768 | 5.74E+20   |
| cg13586425   | 0.03483395 | 18.1193247 | 1.2291922  | 267.094055 |
| cg17162095   | 0.03488736 | 0.00562239 | 4.57E-05   | 0.69236774 |
| cg16580499   | 0.03490521 | 3.66837461 | 1.09648568 | 12.2728208 |
| cg24255928   | 0.03491133 | 26.5191804 | 1.26136266 | 557.545385 |
| cg11530564   | 0.03491719 | 37.2046383 | 1.29183947 | 1071.48384 |



|            |            |            |            |            |            |            |            |            |            |
|------------|------------|------------|------------|------------|------------|------------|------------|------------|------------|
| cg24775108 | 0.01869894 | 1.3716E+13 | 153.927496 | 1.22E+24   | cg14019947 | 0.03493242 | 9.536E+11  | 7.03535392 | 1.29E+23   |
| cg10012711 | 0.01869966 | 5.55160061 | 1.3302704  | 23.1684245 | cg20941820 | 0.03493674 | 4.05678909 | 1.10408514 | 14.9060404 |
| cg23280754 | 0.01869968 | 7.45910725 | 1.39731889 | 39.8178837 | cg23271831 | 0.03495046 | 7.21853838 | 1.14984159 | 45.3169349 |
| cg02668708 | 0.01870349 | 469604.173 | 8.79319577 | 2.5079E+10 | cg00910297 | 0.03495233 | 810723264  | 4.25802527 | 1.5436E+17 |
| cg10718991 | 0.01871237 | 14.3453754 | 1.55768627 | 132.11248  | cg04468551 | 0.03495403 | 19.0752315 | 1.23147263 | 295.471005 |
| cg17399362 | 0.01871247 | 5.31701528 | 1.32054314 | 21.4083514 | cg19720565 | 0.03496516 | 12.4070673 | 1.19445853 | 128.874562 |
| cg27176129 | 0.01871716 | 9.6121846  | 1.4571729  | 63.4064035 | cg23130254 | 0.0350026  | 13.0977059 | 1.19844384 | 143.143879 |
| cg21801378 | 0.01872152 | 16.9858338 | 1.6018078  | 180.120579 | cg11897145 | 0.03500616 | 961.64716  | 1.62129625 | 570386.356 |
| cg25751895 | 0.01872309 | 54.798524  | 1.94627579 | 1542.88423 | cg08769189 | 0.03500745 | 25.7888003 | 1.25686418 | 529.144067 |
| cg18098743 | 0.01872953 | 5401.39372 | 4.17491517 | 6988178.9  | cg19522294 | 0.03500959 | 2973616.89 | 2.85297611 | 3.0994E+12 |
| cg21490342 | 0.0187321  | 11705.5897 | 4.74707313 | 28864276.2 | cg25495844 | 0.03501193 | 3719.24635 | 1.78272816 | 7759339.69 |
| cg20147819 | 0.0187323  | 24.5871587 | 1.70302984 | 354.972273 | cg21653581 | 0.03503507 | 3253.95555 | 1.76436697 | 6001147.66 |
| cg02606566 | 0.01873906 | 11785465.5 | 14.9748104 | 9.2754E+12 | cg00290086 | 0.03503587 | 8.88956012 | 1.1657684  | 67.7872889 |
| cg07190921 | 0.01874488 | 18.1778383 | 1.61920819 | 204.071229 | cg00263592 | 0.03504021 | 10.5966133 | 1.18017121 | 95.1456983 |
| cg14950751 | 0.01875029 | 13.6799172 | 1.54434308 | 121.177824 | cg11566061 | 0.0350486  | 7.2220535  | 1.14874342 | 45.4044443 |
| cg08826738 | 0.01875625 | 33.1036771 | 1.78830536 | 612.788767 | cg00129981 | 0.03505232 | 0.0235193  | 0.00071951 | 0.76879234 |
| cg12738347 | 0.01875785 | 4.96441752 | 1.30488244 | 18.8870971 | cg24654028 | 0.0350683  | 27.6789071 | 1.26183279 | 607.150098 |
| cg00731608 | 0.01876603 | 22.4553264 | 1.67630255 | 300.805894 | cg24517380 | 0.03508389 | 102.281739 | 1.38228564 | 7568.30128 |
| cg16353899 | 0.01876635 | 20016.6993 | 5.17759317 | 77385039.7 | cg04131468 | 0.0350909  | 9.64578976 | 1.17172403 | 79.4054382 |
| cg17368254 | 0.01876747 | 8.90503168 | 1.43765046 | 55.1591584 | cg02494572 | 0.03509916 | 13.2116597 | 1.19765207 | 145.741787 |
| cg00856825 | 0.01876986 | 5.78021706 | 1.33807669 | 24.9693531 | cg11658047 | 0.03510393 | 90.422883  | 1.36979003 | 5969.0154  |
| cg16368008 | 0.01877143 | 0.17870201 | 0.04250064 | 0.75138652 | cg09980339 | 0.03510938 | 39921189.4 | 3.3944074  | 4.6951E+14 |
| cg08388507 | 0.01877442 | 0.19394364 | 0.04938243 | 0.76169061 | cg09930748 | 0.03510974 | 11653.1549 | 1.92281422 | 70623577.2 |
| cg17538898 | 0.01878054 | 741623.591 | 9.41881027 | 5.8394E+10 | cg17951138 | 0.03511556 | 6.14943918 | 1.13515887 | 33.3130483 |
| cg12233363 | 0.01878055 | 8.20604013 | 1.41799714 | 47.488879  | cg20583945 | 0.03513075 | 8.07972543 | 1.1568083  | 56.4328274 |
| cg23044079 | 0.01878129 | 17.5698168 | 1.60889784 | 191.869525 | cg00282706 | 0.03513757 | 0.09075872 | 0.0097363  | 0.84602423 |
| cg07545140 | 0.01878417 | 694343.224 | 9.31322745 | 5.1766E+10 | cg27566947 | 0.0351454  | 61.7268058 | 1.33258125 | 2859.26172 |
| cg16264966 | 0.01878532 | 5.58261815 | 1.33012418 | 23.4306134 | cg20700235 | 0.03514998 | 1431.87602 | 1.65848922 | 1236226.87 |
| cg09862200 | 0.01878571 | 14.2120511 | 1.55313751 | 130.04798  | cg27147000 | 0.03515459 | 6.90254745 | 1.14390973 | 41.651155  |
| cg01472538 | 0.0187923  | 31.3825497 | 1.77096745 | 556.116617 | cg07602841 | 0.03516905 | 6.1061418  | 1.13404024 | 32.8779935 |

|            |            |            |            |            |            |            |            |            |            |
|------------|------------|------------|------------|------------|------------|------------|------------|------------|------------|
| cg23873398 | 0.01879305 | 758915.493 | 9.44364334 | 6.0988E+10 | cg10290107 | 0.03517525 | 38275428.2 | 3.36468396 | 4.3541E+14 |
| cg13955572 | 0.01879536 | 218.803386 | 2.44356556 | 19592.2395 | cg00541638 | 0.03519069 | 9.99059433 | 1.17323225 | 85.0743537 |
| cg18353597 | 0.01881233 | 6853381.67 | 13.5738546 | 3.4602E+12 | cg03019000 | 0.03522682 | 8.96748374 | 1.16399745 | 69.0858595 |
| cg00303183 | 0.0188138  | 9.68339498 | 1.45671185 | 64.3697229 | cg16572908 | 0.03523475 | 11563.2598 | 1.91036899 | 69991179   |
| cg07962315 | 0.01881475 | 8.70504716 | 1.43120952 | 52.9467174 | cg08599266 | 0.0352487  | 1175793227 | 4.23561846 | 3.264E+17  |
| cg06460983 | 0.01881505 | 10.1730293 | 1.4686364  | 70.4670847 | cg10424417 | 0.03525283 | 6.60885408 | 1.13937765 | 38.3340435 |
| cg13736376 | 0.01881534 | 7.92742226 | 1.40917954 | 44.5961795 | cg20028470 | 0.03527729 | 17.1573021 | 1.21658468 | 241.966731 |
| cg20026798 | 0.0188189  | 11.071466  | 1.48927751 | 82.306594  | cg21445527 | 0.03530435 | 159.121882 | 1.41760389 | 17860.9648 |
| cg26168907 | 0.01881892 | 5.66692665 | 1.33288939 | 24.0935655 | cg12950012 | 0.03530707 | 1127933.98 | 2.60928711 | 4.8758E+11 |
| cg26846647 | 0.01882582 | 2.7788E+10 | 53.6473522 | 1.4394E+19 | cg00846114 | 0.0353203  | 8.49399567 | 1.15845623 | 62.2794029 |
| cg01003803 | 0.01882788 | 9.56547202 | 1.45343285 | 62.9532042 | cg16996661 | 0.03532044 | 30991813.3 | 3.27373659 | 2.9339E+14 |
| cg19306380 | 0.01883366 | 7.03712616 | 1.38129245 | 35.8513107 | cg05329798 | 0.03532474 | 368.500266 | 1.50104422 | 90465.3204 |
| cg12457341 | 0.01883744 | 3389.92156 | 3.83995734 | 2992629.14 | cg23642078 | 0.03532671 | 62.5339507 | 1.32871124 | 2943.07362 |
| cg19237879 | 0.01884547 | 14.092234  | 1.54923545 | 128.186493 | cg11472173 | 0.03533845 | 289520948  | 3.81056419 | 2.1997E+16 |
| cg18536827 | 0.01885161 | 0.19482536 | 0.0497508  | 0.76294094 | cg04439516 | 0.03534336 | 336987.668 | 2.39549405 | 4.7406E+10 |
| cg02446170 | 0.01885179 | 147950.276 | 7.16556434 | 3054788603 | cg19655952 | 0.03534468 | 13.2694683 | 1.19415584 | 147.450427 |
| cg07478122 | 0.01885531 | 0.13575212 | 0.02564097 | 0.71871837 | cg05708074 | 0.03536265 | 0.00010958 | 2.24E-08   | 0.53526561 |
| cg17935677 | 0.01885586 | 23523.7899 | 5.28467084 | 104712045  | cg19306970 | 0.03537241 | 9.96810773 | 1.1705604  | 84.8851301 |
| cg01770333 | 0.01887115 | 262.054286 | 2.51030346 | 27356.2338 | cg16856833 | 0.03538272 | 8.67409885 | 1.15933459 | 64.899289  |
| cg10015871 | 0.01887334 | 7.14308981 | 1.38395603 | 36.8680296 | cg03100639 | 0.03538942 | 12.42135   | 1.18807498 | 129.865487 |
| cg11466815 | 0.01887428 | 705090865  | 28.9932258 | 1.7147E+16 | cg11154838 | 0.03539188 | 6891.2328  | 1.83021062 | 25947335.7 |
| cg04566778 | 0.01887732 | 7255632.11 | 13.6043092 | 3.8697E+12 | cg23657870 | 0.03539394 | 6226.33418 | 1.81738936 | 21331277.8 |
| cg10759590 | 0.01887894 | 92.1381303 | 2.1114804  | 4020.60803 | cg27660248 | 0.03540098 | 32347.9666 | 2.03338736 | 514604822  |
| cg06927327 | 0.01890114 | 0.00013617 | 8.06E-08   | 0.2300551  | cg10812348 | 0.03540395 | 2045.24761 | 1.68352356 | 2484692.16 |
| cg07333223 | 0.01890409 | 700842.045 | 9.22250074 | 5.3259E+10 | cg01193217 | 0.0354043  | 8.0993145  | 1.15364327 | 56.8623743 |
| cg12217560 | 0.01890674 | 7.94524386 | 1.40783092 | 44.8398307 | cg16681199 | 0.03541144 | 16.8719622 | 1.21284159 | 234.707575 |
| cg13558810 | 0.01890714 | 28.9422024 | 1.74261668 | 480.685795 | cg00357238 | 0.03541274 | 191310.898 | 2.29434765 | 1.5952E+10 |
| cg23244913 | 0.01891471 | 4.44791053 | 1.27918438 | 15.4660331 | cg07194846 | 0.03541856 | 31.7747631 | 1.26626359 | 797.334436 |
| cg06148175 | 0.01892027 | 32.6102474 | 1.77670413 | 598.539858 | cg16721449 | 0.03542044 | 8.99E-12   | 4.58E-22   | 0.17625641 |
| cg20950465 | 0.01892377 | 4.7685602  | 1.29383133 | 17.5750624 | cg18235937 | 0.03542651 | 18.4199309 | 1.2198621  | 278.141156 |

|            |            |            |            |            |            |            |            |            |            |
|------------|------------|------------|------------|------------|------------|------------|------------|------------|------------|
| cg17603321 | 0.01892518 | 31681.4957 | 5.52351092 | 181717242  | cg00724111 | 0.03549427 | 12.3489691 | 1.18601402 | 128.579456 |
| cg07356681 | 0.01892565 | 15352.7113 | 4.90137989 | 48089670.4 | cg27477990 | 0.03550667 | 307933.318 | 2.35592215 | 4.0249E+10 |
| cg12830839 | 0.01893593 | 2.9254E+14 | 242.375737 | 3.53E+26   | cg17856005 | 0.03552079 | 116.633791 | 1.38038178 | 9854.83977 |
| cg17347389 | 0.01894398 | 6.65567696 | 1.36660169 | 32.4147381 | cg02951971 | 0.03554443 | 11659.3152 | 1.88353925 | 72172444.2 |
| cg07138603 | 0.01894551 | 4.23701042 | 1.26857859 | 14.1514743 | cg02786912 | 0.03555487 | 6.56774808 | 1.13560613 | 37.9843978 |
| cg18603154 | 0.01894617 | 53.6023159 | 1.92708393 | 1490.96167 | cg25731359 | 0.03555808 | 8.81277474 | 1.15835059 | 67.047921  |
| cg17952262 | 0.01895432 | 6.53425762 | 1.36227705 | 31.3420259 | cg10322499 | 0.03556014 | 136.696171 | 1.39393587 | 13405.0954 |
| cg14421548 | 0.01895444 | 20.0003872 | 1.63788751 | 244.226472 | cg07218357 | 0.03556871 | 10.4410368 | 1.17154442 | 93.0525953 |
| cg21127268 | 0.01895568 | 5.51311018 | 1.32465665 | 22.9451034 | cg23684878 | 0.03557532 | 3.98295246 | 1.09771598 | 14.4517439 |
| cg13707690 | 0.01895686 | 0.0050005  | 5.98E-05   | 0.41788917 | cg05146399 | 0.03557638 | 0.11192206 | 0.01452067 | 0.86267004 |
| cg11432962 | 0.01896786 | 6.55724706 | 1.36282234 | 31.5503258 | cg17237881 | 0.03557886 | 2412.21908 | 1.69090011 | 3441244.63 |
| cg07261225 | 0.01896826 | 75961212   | 19.8239325 | 2.9107E+14 | cg19800427 | 0.03557987 | 8.66438157 | 1.15674703 | 64.8988117 |
| cg16677112 | 0.01897045 | 4.38100468 | 1.27525431 | 15.0504899 | cg09597767 | 0.03558438 | 0.00635774 | 5.68E-05   | 0.7110678  |
| cg27173965 | 0.01897113 | 10.1739377 | 1.46493432 | 70.6577811 | cg21988950 | 0.03558711 | 0.1943761  | 0.04219214 | 0.89547637 |
| cg05947740 | 0.01897309 | 13.0393967 | 1.52594876 | 111.423051 | cg22001110 | 0.03559616 | 16645.5764 | 1.92452949 | 143970365  |
| cg27587033 | 0.01897614 | 0.00182426 | 9.39E-06   | 0.35425053 | cg23398241 | 0.03560627 | 104.09838  | 1.36704002 | 7926.96083 |
| cg05654163 | 0.01897965 | 6.72759618 | 1.36837279 | 33.076184  | cg06664023 | 0.03560944 | 1.3471E+10 | 4.80377355 | 3.7777E+19 |
| cg04402803 | 0.01898034 | 16.6081652 | 1.58770102 | 173.729906 | cg16697493 | 0.03562809 | 174.061542 | 1.41435988 | 21421.2951 |
| cg02822958 | 0.01898185 | 109.78581  | 2.16616414 | 5564.17861 | cg16774354 | 0.03563849 | 488.97     | 1.5155137  | 157762.784 |
| cg18845797 | 0.01898368 | 0.17248317 | 0.03972345 | 0.74893914 | cg00956573 | 0.03563939 | 376849.719 | 2.36789085 | 5.9976E+10 |
| cg02329038 | 0.01898368 | 5.16014297 | 1.30987924 | 20.3278857 | cg18793200 | 0.035651   | 1568.34231 | 1.63810405 | 1501551.51 |
| cg03716942 | 0.01898762 | 1580299080 | 32.5775832 | 7.6658E+16 | cg21870662 | 0.03565413 | 744.741458 | 1.55811992 | 355967.364 |
| cg19422030 | 0.01899472 | 5.63514086 | 1.32881407 | 23.8971075 | cg05031240 | 0.03565431 | 13242.8346 | 1.88982789 | 92798221.7 |
| cg04594090 | 0.01899549 | 7.153E+10  | 60.903645  | 8.4011E+19 | cg22999786 | 0.03566161 | 31.1174302 | 1.25911838 | 769.025757 |
| cg11323506 | 0.01900435 | 6.71048039 | 1.36734982 | 32.9327189 | cg15372508 | 0.03566361 | 8.38399893 | 1.15314449 | 60.9563143 |
| cg02918146 | 0.01901244 | 5.26877495 | 1.31393692 | 21.127338  | cg02811627 | 0.03566557 | 60.4784161 | 1.31635694 | 2778.60716 |
| cg10474377 | 0.01901334 | 105.724155 | 2.15056431 | 5197.51816 | cg24633648 | 0.03566943 | 663.672823 | 1.54534687 | 285024.433 |
| cg06746893 | 0.01902294 | 0.19525686 | 0.04985534 | 0.76471738 | cg26928531 | 0.03567144 | 47.8051724 | 1.29563026 | 1763.87862 |
| cg21091841 | 0.01902468 | 11.612428  | 1.49579587 | 90.1516622 | cg10537847 | 0.03567224 | 632183.003 | 2.44614242 | 1.6338E+11 |
| cg24603803 | 0.01903453 | 54.6182557 | 1.9282834  | 1547.05156 | cg08093097 | 0.03569291 | 6169.02138 | 1.79239763 | 21232356.1 |

|            |            |            |            |            |            |            |            |            |            |
|------------|------------|------------|------------|------------|------------|------------|------------|------------|------------|
| cg12167564 | 0.0190421  | 11.5612617 | 1.49426662 | 89.4504159 | cg01268541 | 0.03572835 | 5.98564045 | 1.12673715 | 31.7979145 |
| cg02170312 | 0.0190427  | 34505.8217 | 5.55394663 | 214379397  | cg06838879 | 0.03572962 | 10.4778099 | 1.16958429 | 93.8662574 |
| cg17884201 | 0.01904568 | 0.08719469 | 0.0113451  | 0.67014992 | cg24498692 | 0.03573526 | 0.09538859 | 0.01064169 | 0.85503133 |
| cg07535060 | 0.01904998 | 37.7891446 | 1.81444065 | 787.030121 | cg02707152 | 0.03576809 | 26.9840191 | 1.24493855 | 584.878096 |
| cg06121514 | 0.01905176 | 0.13314341 | 0.02467575 | 0.71840449 | cg19540943 | 0.03577392 | 11675738.1 | 2.94893017 | 4.6228E+13 |
| cg02257405 | 0.01905595 | 15.9445851 | 1.57478043 | 161.438249 | cg08798701 | 0.03578904 | 0.00016832 | 5.04E-08   | 0.56168347 |
| cg18480675 | 0.01905713 | 15.5270398 | 1.56790691 | 153.764846 | cg02626657 | 0.03579693 | 7.85461558 | 1.14652241 | 53.8105363 |
| cg15363487 | 0.01906219 | 10371.1072 | 4.55398902 | 23618823.7 | cg07895149 | 0.03580915 | 8.65138826 | 1.15374129 | 64.872879  |
| cg12160586 | 0.01907016 | 0.08094536 | 0.00989292 | 0.66230721 | cg09200186 | 0.03582154 | 1134.13561 | 1.59318787 | 807352.103 |
| cg07706687 | 0.01908202 | 887.529337 | 3.04049986 | 259071.981 | cg19209269 | 0.03582894 | 0.03346223 | 0.00140201 | 0.79865157 |
| cg14609668 | 0.01909456 | 24.5275165 | 1.68857017 | 356.277209 | cg25363886 | 0.03584446 | 334886592  | 3.66013315 | 3.0641E+16 |
| cg04080724 | 0.01910098 | 284.06834  | 2.52100338 | 32009.0098 | cg05912499 | 0.03585374 | 66.0744031 | 1.31892242 | 3310.14673 |
| cg16572908 | 0.01910718 | 6629.45497 | 4.22017028 | 10414194.3 | cg05191488 | 0.03585745 | 23339.0795 | 1.94287382 | 280364389  |
| cg09871079 | 0.01910869 | 218.574367 | 2.4144447  | 19787.0565 | cg03660115 | 0.03585837 | 7.02190223 | 1.13734277 | 43.352903  |
| cg04707408 | 0.01913156 | 6.71762278 | 1.36527936 | 33.0529101 | cg09125320 | 0.03586676 | 9.00448186 | 1.15606554 | 70.1350317 |
| cg09265173 | 0.0191318  | 997753.816 | 9.56368862 | 1.0409E+11 | cg13325231 | 0.03587241 | 9.31293934 | 1.15856431 | 74.860617  |
| cg17349515 | 0.01913498 | 0.14571648 | 0.02908943 | 0.72993159 | cg00103132 | 0.03588079 | 11869909   | 2.92634488 | 4.8147E+13 |
| cg10676604 | 0.01913767 | 21.6809368 | 1.65327947 | 284.321573 | cg13071386 | 0.03588331 | 7.40819956 | 1.14108426 | 48.0958528 |
| cg22708944 | 0.01914227 | 0.19793926 | 0.05105102 | 0.76746654 | cg19435284 | 0.03589716 | 11.0474691 | 1.17133879 | 104.194084 |
| cg08360738 | 0.01914251 | 0.01100809 | 0.00025316 | 0.47866987 | cg10891888 | 0.03591159 | 198818.543 | 2.2306685  | 1.7721E+10 |
| cg19972696 | 0.01914929 | 9.25200565 | 1.43822653 | 59.5174729 | cg17740434 | 0.03592054 | 0.12663182 | 0.01836807 | 0.87301612 |
| cg19160754 | 0.01915201 | 0.08736721 | 0.01136579 | 0.67157935 | cg02882624 | 0.03593164 | 1788544258 | 4.05064577 | 7.8972E+17 |
| cg20470857 | 0.01915572 | 9.93064071 | 1.45480273 | 67.7876271 | cg10729325 | 0.03594698 | 12126.1084 | 1.85277953 | 79363195.8 |
| cg20556988 | 0.01915585 | 0.19771642 | 0.05093771 | 0.76744282 | cg22211300 | 0.03595853 | 2290.97754 | 1.66021982 | 3161375.39 |
| cg18792146 | 0.01915718 | 4.23152176 | 1.26560756 | 14.1479689 | cg22132343 | 0.03597594 | 0.10378748 | 0.01249312 | 0.86222196 |
| cg11090139 | 0.01915929 | 19201.0144 | 5.00438257 | 73671217.3 | cg17300750 | 0.0359761  | 10.0586595 | 1.16306192 | 86.9916114 |
| cg21433558 | 0.01916664 | 5.07051658 | 1.3034064  | 19.725343  | cg21225608 | 0.03598268 | 388114.536 | 2.32026353 | 6.4921E+10 |
| cg09337254 | 0.01917321 | 20.5939975 | 1.63821513 | 258.88708  | cg19422030 | 0.03598586 | 5.69134134 | 1.12042186 | 28.9099734 |
| cg04079538 | 0.0191737  | 53.4972012 | 1.91432765 | 1495.01604 | cg23955930 | 0.03598688 | 663391.348 | 2.40237555 | 1.8319E+11 |
| cg10506057 | 0.01917588 | 0.13207305 | 0.02427024 | 0.718711   | cg21349401 | 0.0360007  | 8853.83536 | 1.81049753 | 43297711.9 |

|            |            |            |            |            |            |            |            |            |            |
|------------|------------|------------|------------|------------|------------|------------|------------|------------|------------|
| cg10584478 | 0.01918914 | 0.0358884  | 0.00221587 | 0.58125035 | cg06148175 | 0.03600455 | 40.3153234 | 1.27299439 | 1276.77334 |
| cg15909016 | 0.01919589 | 1788207.43 | 10.4534292 | 3.059E+11  | cg24276070 | 0.03601524 | 7308662.23 | 2.80410034 | 1.9049E+13 |
| cg25594549 | 0.01919657 | 23.4358595 | 1.67228087 | 328.437359 | cg24269840 | 0.03603964 | 8.03863901 | 1.14536133 | 56.4186299 |
| cg26087598 | 0.01919797 | 449085210  | 25.7254803 | 7.8396E+15 | cg18634560 | 0.03603969 | 9.72115019 | 1.15962263 | 81.4926841 |
| cg14415214 | 0.01920172 | 5.97E-07   | 3.69E-12   | 0.09674894 | cg17789479 | 0.03604918 | 1.3727E+15 | 9.66012185 | 1.95E+29   |
| cg20698170 | 0.01920389 | 93687.6659 | 6.45950094 | 1358832336 | cg22099236 | 0.03604922 | 1546122.12 | 2.52769663 | 9.4572E+11 |
| cg11947981 | 0.01920652 | 4.39918727 | 1.27301633 | 15.2023569 | cg19910382 | 0.03605133 | 0.1111594  | 0.0142548  | 0.86682467 |
| cg00106446 | 0.01920662 | 1.1064E+10 | 43.3107153 | 2.8265E+18 | cg25982743 | 0.03606945 | 13.5516755 | 1.18451874 | 155.040104 |
| cg03189237 | 0.01920779 | 2563.31811 | 3.59265533 | 1828897.88 | cg07665387 | 0.03609768 | 7.243001   | 1.13695696 | 46.141644  |
| cg02891726 | 0.01920894 | 0.106989   | 0.01647501 | 0.69478831 | cg06484562 | 0.03611156 | 1024973.39 | 2.45032591 | 4.2875E+11 |
| cg11399814 | 0.01920925 | 89757714.9 | 19.7586904 | 4.0774E+14 | cg02317397 | 0.03611207 | 0.06972848 | 0.00577713 | 0.84160438 |
| cg04407431 | 0.01921141 | 414861.476 | 8.22650765 | 2.0921E+10 | cg13804854 | 0.03612852 | 6656.16829 | 1.76704273 | 25072724.9 |
| cg15547624 | 0.01921173 | 651793.663 | 8.85455742 | 4.7979E+10 | cg15822350 | 0.03613763 | 14925.7009 | 1.86095615 | 119710798  |
| cg17667988 | 0.01922175 | 149924.426 | 6.96357707 | 3227843006 | cg10968375 | 0.03614196 | 1.3523E+10 | 4.51326243 | 4.0522E+19 |
| cg14328907 | 0.01922216 | 51841458.3 | 18.0395625 | 1.4898E+14 | cg04582136 | 0.03614698 | 0.0005643  | 5.16E-07   | 0.61691106 |
| cg07562079 | 0.01922296 | 90190494.1 | 19.739712  | 4.1208E+14 | cg10409799 | 0.03614754 | 733473.502 | 2.39195064 | 2.2491E+11 |
| cg02081427 | 0.01923431 | 7218.7088  | 4.24590309 | 12272950.1 | cg02819335 | 0.03615635 | 4.85791668 | 1.1073797  | 21.310987  |
| cg12107580 | 0.01924022 | 0.00908592 | 0.00017739 | 0.46537731 | cg07285708 | 0.03615928 | 10.3695489 | 1.162872   | 92.4672228 |
| cg07578070 | 0.01925051 | 442.093282 | 2.69317029 | 72571.1519 | cg23275158 | 0.0361616  | 47.6133155 | 1.28297845 | 1767.00381 |
| cg27113548 | 0.01925113 | 0.16005819 | 0.03451182 | 0.74231455 | cg24692861 | 0.03616826 | 1904.63837 | 1.62723311 | 2229334.76 |
| cg17916473 | 0.01925236 | 3899.56755 | 3.83701247 | 3963142.48 | cg14826401 | 0.03616928 | 5.48E-14   | 2.15E-26   | 0.13967273 |
| cg02132636 | 0.01925706 | 5720.55731 | 4.08258497 | 8015699.88 | cg03853794 | 0.03618087 | 9.45009189 | 1.15564544 | 77.2765017 |
| cg26706909 | 0.01925914 | 2475.52406 | 3.56237459 | 1720262.49 | cg10684802 | 0.03618839 | 7.46480202 | 1.13813891 | 48.9599897 |
| cg17217059 | 0.01926066 | 18.5566372 | 1.60774861 | 214.180738 | cg16751098 | 0.03622634 | 4313969.94 | 2.66572664 | 6.9813E+12 |
| cg27495887 | 0.01926708 | 747.538987 | 2.93112724 | 190648.338 | cg10268345 | 0.03623661 | 8.93033716 | 1.15073722 | 69.3041995 |
| cg25947878 | 0.01926895 | 4.23262444 | 1.26424437 | 14.1706066 | cg01447966 | 0.03625305 | 3.4341E+13 | 7.36025293 | 1.60E+26   |
| cg02898915 | 0.01926932 | 33.2118817 | 1.76694565 | 624.257508 | cg11529190 | 0.03625642 | 13446.8143 | 1.83799698 | 98377100.8 |
| cg09106999 | 0.01927076 | 52.8884422 | 1.90565225 | 1467.83723 | cg01553935 | 0.03626409 | 33.2529784 | 1.25135447 | 883.650957 |
| cg03807235 | 0.0192727  | 0.00054573 | 1.01E-06   | 0.29499053 | cg16579893 | 0.03626936 | 56.1594552 | 1.29389039 | 2437.52054 |
| cg18500436 | 0.01927315 | 12.2823142 | 1.50310186 | 100.362621 | cg26504026 | 0.03630921 | 12.446977  | 1.17442182 | 131.917879 |

|            |            |            |            |            |            |            |            |            |            |
|------------|------------|------------|------------|------------|------------|------------|------------|------------|------------|
| cg09686308 | 0.01928071 | 28.3902469 | 1.72201761 | 468.059159 | cg20023120 | 0.03636463 | 7.59630812 | 1.1373782  | 50.7341334 |
| cg00009001 | 0.01928438 | 4.92313026 | 1.29545648 | 18.7093986 | cg18191200 | 0.03637285 | 3227.56106 | 1.66961258 | 6239262.04 |
| cg12296552 | 0.01929473 | 0.1707046  | 0.03882593 | 0.75053085 | cg11786946 | 0.03637353 | 0.00022265 | 8.45E-08   | 0.58653237 |
| cg03009158 | 0.01929829 | 0.05318417 | 0.00455386 | 0.62113308 | cg22471129 | 0.03637484 | 17.8304703 | 1.20051004 | 264.8255   |
| cg12718671 | 0.01929994 | 226.580761 | 2.4112597  | 21291.2949 | cg21702506 | 0.03638443 | 24.2489153 | 1.22396656 | 480.413364 |
| cg17107246 | 0.01930368 | 0.04049592 | 0.0027593  | 0.59432516 | cg03591990 | 0.03638519 | 23374.0899 | 1.89189987 | 288782768  |
| cg02797271 | 0.01932674 | 7.31984178 | 1.38084489 | 38.8023913 | cg02634501 | 0.03638697 | 7789067620 | 4.23498391 | 1.4326E+19 |
| cg23575732 | 0.01932845 | 13.4518534 | 1.52396231 | 118.738081 | cg00612202 | 0.03638704 | 392879.628 | 2.26215545 | 6.8233E+10 |
| cg06224510 | 0.01933992 | 8.62919923 | 1.41789923 | 52.5164818 | cg00362906 | 0.03639148 | 574.035832 | 1.49547634 | 220342.594 |
| cg10583651 | 0.01934105 | 8.54759503 | 1.41569437 | 51.6081596 | cg06093712 | 0.03639179 | 6.00685835 | 1.12027929 | 32.2083497 |
| cg00571292 | 0.01935043 | 7.70157256 | 1.39180554 | 42.6167437 | cg21292033 | 0.03640927 | 5.61139405 | 1.11528817 | 28.2328317 |
| cg06263193 | 0.01935476 | 5.1068627  | 1.30215288 | 20.0284062 | cg01166827 | 0.03641028 | 1784.22909 | 1.60573572 | 1982563.76 |
| cg17026874 | 0.01935493 | 8248675294 | 40.3289209 | 1.6871E+18 | cg02273078 | 0.03642235 | 4668776.31 | 2.63915494 | 8.2593E+12 |
| cg03680032 | 0.01936125 | 4.89219615 | 1.29303791 | 18.5095758 | cg26359174 | 0.0364397  | 4.91E-07   | 6.03E-13   | 0.39980038 |
| cg01656216 | 0.01936196 | 0.07068253 | 0.00767154 | 0.65124097 | cg06069457 | 0.03645871 | 0.13666457 | 0.02117275 | 0.88213398 |
| cg03675258 | 0.01936575 | 6.17236812 | 1.34254014 | 28.3776455 | cg16937168 | 0.03648439 | 5.80610483 | 1.11695839 | 30.1809393 |
| cg26103512 | 0.01936638 | 1619.50812 | 3.30670084 | 793179.262 | cg11378840 | 0.03649254 | 500.931482 | 1.47797061 | 169781.691 |
| cg20054157 | 0.01937815 | 9.86673161 | 1.44814634 | 67.2255214 | cg16479401 | 0.03650021 | 1.80E-05   | 6.44E-10   | 0.50351136 |
| cg00850756 | 0.0193819  | 2.2334E+13 | 144.182895 | 3.46E+24   | cg04171065 | 0.03652882 | 6.34448789 | 1.12274334 | 35.8519399 |
| cg11859316 | 0.01938463 | 585523863  | 26.1698345 | 1.3101E+16 | cg03462943 | 0.03653285 | 29.1715845 | 1.23529056 | 688.891642 |
| cg24879595 | 0.01938598 | 1247908.27 | 9.67737727 | 1.6092E+11 | cg15616946 | 0.03653587 | 7.86E-09   | 1.99E-16   | 0.31077201 |
| cg20887061 | 0.01938816 | 171.583875 | 2.29764503 | 12813.566  | cg06223477 | 0.03653768 | 536211178  | 3.52061465 | 8.1668E+16 |
| cg14163776 | 0.01939139 | 83.7187006 | 2.04573801 | 3426.05984 | cg05426966 | 0.03654424 | 6.72678093 | 1.12670172 | 40.161101  |
| cg09159285 | 0.01939426 | 4.74504177 | 1.28620399 | 17.505327  | cg09741298 | 0.03654795 | 355.98135  | 1.44422793 | 87744.2675 |
| cg12019705 | 0.01939696 | 0.0838393  | 0.01049284 | 0.66988821 | cg10143146 | 0.03655824 | 7.66024801 | 1.1357406  | 51.666199  |
| cg20020464 | 0.01940076 | 1830.71532 | 3.36693844 | 995420.217 | cg01814945 | 0.03656956 | 31.0679805 | 1.23939196 | 778.78463  |
| cg17339521 | 0.01940184 | 53.2962043 | 1.901161   | 1494.07935 | cg16354207 | 0.03658292 | 89.49798   | 1.32366608 | 6051.29086 |
| cg25789861 | 0.01940739 | 4.12605038 | 1.2573071  | 13.5402812 | cg27640078 | 0.03660436 | 90.2164262 | 1.32368798 | 6148.73269 |
| cg27612744 | 0.01940747 | 1072.46832 | 3.08720566 | 372566.14  | cg23679724 | 0.03661021 | 10.863508  | 1.16010009 | 101.728987 |
| cg17476026 | 0.01941274 | 9.04041159 | 1.42705131 | 57.2712706 | cg20116935 | 0.03662103 | 29.4906398 | 1.23429048 | 704.613581 |

|            |            |            |            |            |            |            |            |            |            |
|------------|------------|------------|------------|------------|------------|------------|------------|------------|------------|
| cg18284650 | 0.0194139  | 1147107.58 | 9.5208084  | 1.3821E+11 | cg23540518 | 0.03664432 | 7.42729185 | 1.13257293 | 48.7073835 |
| cg18212197 | 0.01941881 | 84.1031769 | 2.04553591 | 3457.94191 | cg21576886 | 0.03665089 | 0.15967372 | 0.02856989 | 0.89239744 |
| cg04771433 | 0.0194223  | 0.13076664 | 0.02374846 | 0.72004312 | cg07704437 | 0.03665344 | 1907786.77 | 2.45270512 | 1.4839E+12 |
| cg10273135 | 0.01942584 | 6.603965   | 1.35624255 | 32.1567508 | cg01027532 | 0.03665884 | 12.2490693 | 1.16809134 | 128.448602 |
| cg23890469 | 0.01943056 | 28.3963678 | 1.71611465 | 469.871699 | cg19554255 | 0.03666357 | 7.27445574 | 1.13089607 | 46.792723  |
| cg26875384 | 0.01943288 | 16.2818437 | 1.56870357 | 168.99205  | cg13119284 | 0.03667944 | 316896211  | 3.35966094 | 2.9891E+16 |
| cg25369015 | 0.0194382  | 64.5585429 | 1.95892685 | 2127.59628 | cg16751451 | 0.03667994 | 8.03441728 | 1.13768973 | 56.7394247 |
| cg01818776 | 0.01944048 | 0.22003249 | 0.06180826 | 0.78329812 | cg27231335 | 0.03668267 | 15.6455286 | 1.18556656 | 206.46885  |
| cg00739123 | 0.01944132 | 100538.466 | 6.41164379 | 1576504160 | cg08753297 | 0.0367255  | 11.596393  | 1.163183   | 115.610639 |
| cg08938584 | 0.01944512 | 10.864912  | 1.46927503 | 80.343238  | cg01374870 | 0.0367312  | 0.03347851 | 0.00138192 | 0.81105189 |
| cg04680150 | 0.01944679 | 80.278675  | 2.02850229 | 3177.05613 | cg21041775 | 0.03675162 | 3.97436936 | 1.08864219 | 14.5094614 |
| cg06168026 | 0.01944913 | 5.23655218 | 1.30604057 | 20.9958858 | cg08911275 | 0.03676402 | 3.53536414 | 1.08074289 | 11.5650075 |
| cg02196805 | 0.01945298 | 8.54334019 | 1.41323358 | 51.6465663 | cg25589890 | 0.03676505 | 21.1738231 | 1.20646455 | 371.607093 |
| cg21788755 | 0.01945472 | 14.6129162 | 1.54094107 | 138.575917 | cg18146964 | 0.03676852 | 230002.747 | 2.13581923 | 2.4769E+10 |
| cg02641288 | 0.01946256 | 11.6980274 | 1.4864487  | 92.0609266 | cg07614064 | 0.03680312 | 1429477344 | 3.64043812 | 5.6131E+17 |
| cg22505962 | 0.01946278 | 31.1754879 | 1.74083923 | 558.30029  | cg27062369 | 0.0368072  | 24.2497214 | 1.21575341 | 483.691004 |
| cg25665152 | 0.01946614 | 10053.3673 | 4.41531752 | 22890809.9 | cg19794507 | 0.0368108  | 6.57346123 | 1.12226193 | 38.502948  |
| cg03337035 | 0.01947106 | 20.8837274 | 1.63169453 | 267.286591 | cg03554335 | 0.03682467 | 9.6504844  | 1.14879045 | 81.0694843 |
| cg11846581 | 0.0194711  | 1.9085E+11 | 65.6850288 | 5.54E+20   | cg04578193 | 0.03683307 | 24.8830828 | 1.21717117 | 508.694114 |
| cg20303303 | 0.01947178 | 2.7413E+11 | 69.6229164 | 1.08E+21   | cg24404083 | 0.03686183 | 503212171  | 3.39482038 | 7.4591E+16 |
| cg12644264 | 0.019474   | 10.8044419 | 1.46725738 | 79.560659  | cg20801130 | 0.03686291 | 54.558349  | 1.2762658  | 2332.28333 |
| cg03096732 | 0.01947482 | 78.6480397 | 2.02009455 | 3061.9924  | cg00494665 | 0.03686474 | 5.06584131 | 1.10401333 | 23.2449623 |
| cg03722802 | 0.01948126 | 12.8515204 | 1.50865353 | 109.476147 | cg20180059 | 0.0368819  | 157887884  | 3.15710542 | 7.896E+15  |
| cg27426082 | 0.01948631 | 1415.04002 | 3.21588063 | 622640.731 | cg23336454 | 0.03688746 | 3134.07146 | 1.63237714 | 6017239.32 |
| cg19163814 | 0.01949321 | 1.7359E+11 | 64.4347641 | 4.68E+20   | cg08545493 | 0.03690395 | 0.12658497 | 0.01816903 | 0.88192677 |
| cg01488300 | 0.01950518 | 15.2190349 | 1.54960283 | 149.469929 | cg03547631 | 0.03690801 | 4.2457E+12 | 5.85350845 | 3.08E+24   |
| cg04003582 | 0.01951092 | 6.41125653 | 1.34830361 | 30.4858712 | cg01283289 | 0.03690888 | 12.2839922 | 1.16465094 | 129.563683 |
| cg04909508 | 0.01951886 | 2.44E+11   | 67.7504104 | 8.79E+20   | cg20254361 | 0.03694849 | 10.4728735 | 1.15288295 | 95.1363537 |
| cg26824174 | 0.0195397  | 12.2302474 | 1.49515521 | 100.042425 | cg23842796 | 0.0369505  | 4.95935858 | 1.10183065 | 22.3221576 |
| cg15440392 | 0.01953976 | 3435325.6  | 11.2186071 | 1.052E+12  | cg19635869 | 0.03695298 | 56.3307982 | 1.27644825 | 2485.92829 |

|            |            |            |            |            |            |            |            |            |            |
|------------|------------|------------|------------|------------|------------|------------|------------|------------|------------|
| cg25985355 | 0.01954089 | 5.80010265 | 1.32627166 | 25.3652339 | cg06321304 | 0.03696045 | 38470.4637 | 1.89429519 | 781280864  |
| cg11008243 | 0.01954532 | 8.27676841 | 1.40413944 | 48.7878151 | cg04700925 | 0.03696594 | 22670.0165 | 1.83413332 | 280202996  |
| cg11399754 | 0.0195458  | 6414629575 | 37.5853441 | 1.0948E+18 | cg09848727 | 0.03697781 | 1593680274 | 3.59787359 | 7.0592E+17 |
| cg01522826 | 0.01954592 | 20.7150605 | 1.6270192  | 263.742268 | cg17371020 | 0.03699695 | 20.6688772 | 1.20047064 | 355.862503 |
| cg27099511 | 0.0195598  | 179225152  | 21.1197991 | 1.5209E+15 | cg26269802 | 0.0369985  | 9.61073128 | 1.14625431 | 80.580858  |
| cg05155520 | 0.01956172 | 0.20591581 | 0.05464176 | 0.77598741 | cg04981611 | 0.03703132 | 6.00175075 | 1.11383185 | 32.3397218 |
| cg22230604 | 0.01956277 | 5.65313235 | 1.32047074 | 24.2019036 | cg10227731 | 0.037032   | 67770038.4 | 2.95851182 | 1.5524E+15 |
| cg01643580 | 0.01956976 | 9.38514817 | 1.43222891 | 61.4992516 | cg11926393 | 0.03703305 | 27947.605  | 1.8511643  | 421933710  |
| cg02382037 | 0.01957532 | 8.85031074 | 1.41869151 | 55.2114394 | cg17379405 | 0.03703645 | 10.8437209 | 1.15411172 | 101.884662 |
| cg11203156 | 0.01957736 | 10721718.9 | 13.4129711 | 8.5705E+12 | cg04693399 | 0.03703746 | 615.397712 | 1.47131243 | 257398.997 |
| cg02614657 | 0.01957867 | 0.14355213 | 0.02813273 | 0.73249973 | cg03363567 | 0.03703766 | 212537159  | 3.16737488 | 1.4262E+16 |
| cg19653161 | 0.0195868  | 56.8952557 | 1.91147218 | 1693.49581 | cg17635080 | 0.03704509 | 5.85225752 | 1.11200858 | 30.799149  |
| cg01290345 | 0.01958882 | 80.6828238 | 2.02144689 | 3220.32604 | cg12214534 | 0.03705259 | 2116147.34 | 2.39808094 | 1.8674E+12 |
| cg02665570 | 0.0195938  | 117855.969 | 6.49797905 | 2137592211 | cg20964023 | 0.03708461 | 84905.6141 | 1.97337698 | 3653110064 |
| cg17346857 | 0.01959744 | 32.4902439 | 1.746822   | 604.306534 | cg13085976 | 0.03708999 | 13.3767933 | 1.16796772 | 153.205091 |
| cg08876479 | 0.019603   | 12978144.2 | 13.7903327 | 1.2214E+13 | cg13995497 | 0.03709124 | 8.25491748 | 1.13468353 | 60.055214  |
| cg04650403 | 0.01961407 | 679.401325 | 2.84123039 | 162459.955 | cg10984505 | 0.03709174 | 169779.969 | 2.05612715 | 1.4019E+10 |
| cg18189263 | 0.0196147  | 0.11485988 | 0.01865637 | 0.70714663 | cg02989600 | 0.03710074 | 45.8087412 | 1.25703283 | 1669.36035 |
| cg05730283 | 0.01962217 | 10637077   | 13.3293719 | 8.4886E+12 | cg09639735 | 0.03710257 | 286.005218 | 1.40249467 | 58323.9187 |
| cg01348086 | 0.01962994 | 12.1345861 | 1.49096035 | 98.7606285 | cg01761478 | 0.03710733 | 4540.13387 | 1.65432684 | 12459941.4 |
| cg05147525 | 0.01963361 | 187.233403 | 2.30977821 | 15177.3651 | cg23652987 | 0.03711897 | 22.1491217 | 1.20322902 | 407.722539 |
| cg00202389 | 0.01963675 | 0.03807167 | 0.00244495 | 0.59283486 | cg10714284 | 0.03712492 | 118019.104 | 2.00798697 | 6936553452 |
| cg17951138 | 0.0196388  | 6.2707569  | 1.34134012 | 29.3157502 | cg05598886 | 0.03714224 | 7.45431391 | 1.12720208 | 49.296215  |
| cg18609783 | 0.01964421 | 8.18646858 | 1.39966671 | 47.88159   | cg06839900 | 0.0371451  | 7.60357299 | 1.12850245 | 51.2310116 |
| cg02969706 | 0.01964457 | 0.20178069 | 0.05259238 | 0.77417009 | cg07535060 | 0.03714567 | 42.302016  | 1.25001468 | 1431.55163 |
| cg19967492 | 0.01964877 | 7.72338915 | 1.38660458 | 43.0192867 | cg27045999 | 0.037146   | 8.93384901 | 1.13938637 | 70.0496866 |
| cg20970697 | 0.01964897 | 3.7338E+11 | 70.8383348 | 1.97E+21   | cg02397514 | 0.03715914 | 2.43E-08   | 1.67E-15   | 0.35216026 |
| cg17807863 | 0.01965153 | 9.87071859 | 1.44201156 | 67.5660917 | cg19196335 | 0.03716096 | 17.267716  | 1.18476769 | 251.672979 |
| cg00341387 | 0.01965526 | 54.2938854 | 1.89362546 | 1556.71016 | cg00708105 | 0.0371881  | 7.13967685 | 1.12380553 | 45.3592584 |
| cg13860849 | 0.01965574 | 8.93805593 | 1.41922048 | 56.2906502 | cg10270204 | 0.03720789 | 0.12620418 | 0.01800683 | 0.88452529 |



|            |            |            |            |            |            |            |            |            |            |
|------------|------------|------------|------------|------------|------------|------------|------------|------------|------------|
| cg23542968 | 0.01965688 | 17.8764392 | 1.58547339 | 201.559408 | cg24380059 | 0.03721235 | 8.69607962 | 1.13674684 | 66.5247513 |
| cg02119927 | 0.0196593  | 12644.6074 | 4.52441173 | 35338537.9 | cg01787574 | 0.0372166  | 5.44552611 | 1.10560959 | 26.8211807 |
| cg23272399 | 0.01966654 | 6.65435908 | 1.35365209 | 32.7118727 | cg16261871 | 0.03721973 | 9.63909943 | 1.14360865 | 81.244784  |
| cg10743378 | 0.0196686  | 7.85371088 | 1.38992949 | 44.376909  | cg14995433 | 0.037244   | 115214.593 | 1.9913514  | 6666027063 |
| cg11636504 | 0.01966939 | 15.6149644 | 1.5512     | 157.186122 | cg13010199 | 0.03724953 | 65804.3915 | 1.9259236  | 2248385112 |
| cg06713675 | 0.01967    | 11.7152907 | 1.4815917  | 92.6355324 | cg06359167 | 0.0372524  | 439653.807 | 2.15420604 | 8.9729E+10 |
| cg25652029 | 0.019672   | 4.20455094 | 1.25784715 | 14.0543695 | cg12977686 | 0.03725787 | 195369495  | 3.08631924 | 1.2367E+16 |
| cg19178040 | 0.01969096 | 5306932.84 | 11.8385165 | 2.379E+12  | cg05807768 | 0.0372612  | 173102916  | 3.06339079 | 9.7815E+15 |
| cg13075709 | 0.01969151 | 4325640.08 | 11.4577922 | 1.6331E+12 | cg10415607 | 0.03729367 | 16604.1155 | 1.77168644 | 155612555  |
| cg07713066 | 0.01969604 | 1.7193E+10 | 42.9759136 | 6.8783E+18 | cg22967612 | 0.037295   | 3593430.8  | 2.43103219 | 5.3116E+12 |
| cg25396971 | 0.01969622 | 9.15458544 | 1.42378571 | 58.8616912 | cg26066361 | 0.03729572 | 5.87419198 | 1.10981286 | 31.0918469 |
| cg07433773 | 0.01969746 | 0.00440178 | 4.61E-05   | 0.42074958 | cg06683487 | 0.03729585 | 0.08948522 | 0.0092297  | 0.86759119 |
| cg18100564 | 0.01969748 | 14.8123182 | 1.53738027 | 142.713404 | cg08738562 | 0.03729954 | 1037101.85 | 2.25888886 | 4.7615E+11 |
| cg10380348 | 0.01969774 | 6.32044177 | 1.34203409 | 29.7667432 | cg15755476 | 0.03730786 | 6.92268965 | 1.12046049 | 42.7713716 |
| cg17960926 | 0.0197022  | 1.37E-06   | 1.61E-11   | 0.11599867 | cg17186803 | 0.03731351 | 13.1559634 | 1.16347652 | 148.760522 |
| cg03969906 | 0.01970371 | 1009.39686 | 3.01433384 | 338012.333 | cg03009158 | 0.03733329 | 0.04631917 | 0.00256914 | 0.83508982 |
| cg04582136 | 0.01970385 | 0.00047411 | 7.62E-07   | 0.2949568  | cg14732337 | 0.03734588 | 20.1451681 | 1.19239934 | 340.34554  |
| cg07714565 | 0.01970391 | 12.9453559 | 1.50451576 | 111.386164 | cg27468419 | 0.03735347 | 6.23060869 | 1.11308414 | 34.8765052 |
| cg09861871 | 0.01970478 | 18509.7619 | 4.79381248 | 71469479.7 | cg01579086 | 0.03736945 | 1537.73301 | 1.53593477 | 1539533.36 |
| cg08363925 | 0.0197059  | 5.25E-05   | 1.33E-08   | 0.20769315 | cg02296128 | 0.03739713 | 4423308749 | 3.65404995 | 5.3545E+18 |
| cg06677890 | 0.01970787 | 6.32457685 | 1.34200249 | 29.8064071 | cg15673540 | 0.03740874 | 411.94237  | 1.42039992 | 119470.942 |
| cg15976636 | 0.01970867 | 12.4485119 | 1.49502993 | 103.653743 | cg18669588 | 0.03741356 | 20.2119973 | 1.19143059 | 342.885971 |
| cg25212090 | 0.01971012 | 6.42363877 | 1.34529435 | 30.6721982 | cg11809091 | 0.03741689 | 9.76277386 | 1.14192944 | 83.4655365 |
| cg04101194 | 0.01971123 | 9.20197455 | 1.42463417 | 59.4372488 | cg22804475 | 0.03741972 | 1.7496E+14 | 6.75154087 | 4.53E+27   |
| cg02357321 | 0.01972732 | 17.2424294 | 1.57418368 | 188.860662 | cg12434312 | 0.03742129 | 12.1263159 | 1.15637822 | 127.162148 |
| cg24079361 | 0.01973478 | 4.345475   | 1.26368973 | 14.9428712 | cg03592345 | 0.03742208 | 17.1870231 | 1.18008824 | 250.314978 |
| cg07669793 | 0.01974231 | 79.6445195 | 2.00798028 | 3159.01981 | cg07500501 | 0.03742927 | 16764355.2 | 2.63240948 | 1.0676E+14 |
| cg25794884 | 0.01974242 | 306.848236 | 2.48909361 | 37827.3599 | cg19621160 | 0.03743914 | 91.4435731 | 1.30021347 | 6431.19554 |
| cg01994599 | 0.01974636 | 19635.9275 | 4.82558994 | 79901038.8 | cg09912793 | 0.03745053 | 9.62905492 | 1.14058264 | 81.2906452 |
| cg22149588 | 0.01975258 | 1040.61872 | 3.02198497 | 358336.437 | cg24938727 | 0.03745228 | 20.1694465 | 1.19059938 | 341.682165 |

|            |            |            |            |            |            |            |            |            |            |
|------------|------------|------------|------------|------------|------------|------------|------------|------------|------------|
| cg21803052 | 0.01975528 | 4.0601E+11 | 70.4096174 | 2.34E+21   | cg18792146 | 0.03745257 | 4.24338479 | 1.08755529 | 16.5566888 |
| cg15233961 | 0.01976558 | 8.97772946 | 1.4178824  | 56.8450716 | cg02879798 | 0.03745375 | 47.8119987 | 1.25176026 | 1826.21808 |
| cg10130900 | 0.01976643 | 7.73421216 | 1.38463045 | 43.2014461 | cg02328440 | 0.03746018 | 11.3792538 | 1.15156628 | 112.444606 |
| cg08301518 | 0.01976981 | 0.03037499 | 0.00160845 | 0.57362196 | cg27431396 | 0.03746145 | 70236.0173 | 1.91085505 | 2581618174 |
| cg10200728 | 0.01977046 | 5679223.76 | 11.8664653 | 2.718E+12  | cg06830784 | 0.03747755 | 4.63156154 | 1.09289062 | 19.6280962 |
| cg25731359 | 0.01977856 | 7.80112659 | 1.386293   | 43.8995045 | cg15242360 | 0.03751209 | 0.15594533 | 0.0270752  | 0.89820019 |
| cg05867645 | 0.01977949 | 71047287.9 | 17.7159385 | 2.8493E+14 | cg10045881 | 0.03751394 | 7.59377904 | 1.12424592 | 51.2925858 |
| cg23681866 | 0.01978329 | 3.6852607  | 1.23041441 | 11.0378636 | cg01721544 | 0.03753703 | 8.71341434 | 1.13293374 | 67.0150307 |
| cg27540189 | 0.01978552 | 43.648407  | 1.82255529 | 1045.33643 | cg21365903 | 0.0375372  | 2126772.42 | 2.31635808 | 1.9527E+12 |
| cg15482168 | 0.01978709 | 514.237278 | 2.69726226 | 98040.1433 | cg04330122 | 0.03755485 | 7.66191065 | 1.12436347 | 52.2116527 |
| cg26264580 | 0.01979004 | 74.7820497 | 1.98513946 | 2817.10936 | cg09874482 | 0.0375554  | 10.7372701 | 1.14641122 | 100.565109 |
| cg05166976 | 0.01979156 | 0.10216292 | 0.01499765 | 0.69592658 | cg11699265 | 0.03756139 | 5.91026274 | 1.10762438 | 31.5370502 |
| cg17740434 | 0.01980035 | 0.15261122 | 0.03139518 | 0.74183946 | cg00014272 | 0.03758314 | 30808.0947 | 1.81034919 | 524284873  |
| cg00969405 | 0.01980242 | 7.16101207 | 1.36711001 | 37.5098517 | cg12665414 | 0.03758493 | 8.17902902 | 1.12824652 | 59.2924637 |
| cg24999883 | 0.01980307 | 0.0007182  | 1.63E-06   | 0.31671033 | cg21276549 | 0.03758546 | 0.02255595 | 0.00063251 | 0.80436752 |
| cg21193440 | 0.0198041  | 4.4849E+11 | 70.8959379 | 2.84E+21   | cg09740133 | 0.03759996 | 0.0069023  | 6.34E-05   | 0.75176676 |
| cg13985198 | 0.01980601 | 22.0657086 | 1.63456489 | 297.87468  | cg12434258 | 0.03760607 | 30350.869  | 1.80668453 | 509870557  |
| cg01722450 | 0.0198073  | 0.18716101 | 0.04570958 | 0.76634358 | cg07757959 | 0.03761147 | 112.644816 | 1.31078995 | 9680.31116 |
| cg19788272 | 0.01981968 | 7.52667289 | 1.37763962 | 41.1216431 | cg05516012 | 0.0376295  | 2.2149E+10 | 3.9058677  | 1.26E+20   |
| cg16429070 | 0.01982001 | 6.43738054 | 1.34387098 | 30.8361953 | cg08386886 | 0.03764339 | 7781.50624 | 1.66835448 | 36294348.8 |
| cg23395902 | 0.01982162 | 6607656.37 | 12.089183  | 3.6116E+12 | cg03880683 | 0.03765552 | 338925.111 | 2.06819995 | 5.5541E+10 |
| cg23043245 | 0.01982575 | 10.9271588 | 1.46147115 | 81.7004155 | cg27477205 | 0.037659   | 14558850.1 | 2.56249639 | 8.2716E+13 |
| cg13915702 | 0.01983114 | 2019973.12 | 10.0068997 | 4.0775E+11 | cg09667226 | 0.03766234 | 5082263514 | 3.57750102 | 7.22E+18   |
| cg02275294 | 0.01983936 | 287.325012 | 2.45395206 | 33641.9214 | cg15348799 | 0.03766961 | 4082.58721 | 1.60626961 | 10376538.4 |
| cg00286450 | 0.01984196 | 1.3791E+17 | 522.169642 | 3.64E+31   | cg10459387 | 0.03770234 | 67.2635887 | 1.27024096 | 3561.83632 |
| cg09449611 | 0.01984653 | 47581.1215 | 5.51507785 | 410504291  | cg08307816 | 0.03774549 | 6.09899133 | 1.10780928 | 33.5777069 |
| cg27064845 | 0.01985231 | 38.5632124 | 1.78404703 | 833.566226 | cg26918305 | 0.03775715 | 202.901153 | 1.35056882 | 30482.6215 |
| cg11270005 | 0.01985571 | 129.988059 | 2.16272762 | 7812.77097 | cg10191684 | 0.03777929 | 134.875667 | 1.31902259 | 13791.6104 |
| cg26839807 | 0.01985995 | 340659416  | 22.4862219 | 5.1609E+15 | cg20887061 | 0.03778175 | 127.701749 | 1.31488147 | 12402.4387 |
| cg19838043 | 0.01986728 | 8.43100484 | 1.40170334 | 50.711046  | cg09251959 | 0.0377834  | 14.5358058 | 1.16306968 | 181.665514 |

|            |            |            |            |            |            |            |            |            |            |
|------------|------------|------------|------------|------------|------------|------------|------------|------------|------------|
| cg11934304 | 0.0198697  | 7.52951894 | 1.37677332 | 41.1786419 | cg07718808 | 0.03779405 | 5705042.25 | 2.40411654 | 1.3538E+13 |
| cg07145284 | 0.01987321 | 5.36022039 | 1.30457936 | 22.0239285 | cg14522034 | 0.03779407 | 14.5152511 | 1.16281342 | 181.192023 |
| cg13762471 | 0.01988236 | 30577.8305 | 5.12875103 | 182306319  | cg06830503 | 0.03782466 | 14487.3134 | 1.71392861 | 122456821  |
| cg02397514 | 0.0198846  | 8.61E-08   | 9.74E-14   | 0.07616942 | cg06491405 | 0.03785456 | 8.10277985 | 1.12450987 | 58.3854738 |
| cg18811550 | 0.01989175 | 14.823742  | 1.53207606 | 143.428471 | cg10779674 | 0.03786506 | 26921.2429 | 1.77110888 | 409208787  |
| cg21868050 | 0.01989221 | 1.508E+15  | 252.13196  | 9.02E+27   | cg07030951 | 0.03786614 | 22972.4278 | 1.75534305 | 300643479  |
| cg27308245 | 0.01989295 | 10.8896746 | 1.45907668 | 81.2740101 | cg26977936 | 0.03791745 | 6.73633235 | 1.11226488 | 40.797992  |
| cg04337096 | 0.01989621 | 7.70225558 | 1.38121837 | 42.9510224 | cg19424078 | 0.03792085 | 6.5708E+14 | 6.70280478 | 6.44E+28   |
| cg06399971 | 0.01989722 | 13.8661273 | 1.51582378 | 126.841582 | cg11365324 | 0.03793602 | 195688.22  | 1.97093572 | 1.9429E+10 |
| cg07811634 | 0.01989825 | 207497425  | 20.6838115 | 2.0816E+15 | cg07407499 | 0.03795582 | 13.922698  | 1.15765592 | 167.443119 |
| cg06642093 | 0.01990234 | 589864689  | 24.3871604 | 1.4267E+16 | cg17803089 | 0.03796375 | 26.1466854 | 1.19877829 | 570.288238 |
| cg02912007 | 0.01990362 | 6.09828519 | 1.3310051  | 27.940601  | cg08856118 | 0.0379696  | 65.1629962 | 1.26100668 | 3367.32242 |
| cg02299189 | 0.01990599 | 1180.05202 | 3.06032869 | 455023.922 | cg15444648 | 0.03797195 | 7.95872681 | 1.12203515 | 56.4521822 |
| cg24082871 | 0.01990986 | 9.00910085 | 1.41560212 | 57.3352475 | cg10723075 | 0.03799228 | 42407384.1 | 2.64632366 | 6.7958E+14 |
| cg23048036 | 0.01991128 | 14.2060068 | 1.52125501 | 132.660618 | cg23473726 | 0.0380089  | 45831.4445 | 1.8109164  | 1159921740 |
| cg05193369 | 0.01991178 | 14.7904115 | 1.53096753 | 142.887598 | cg01510388 | 0.03801762 | 9.43541173 | 1.13211618 | 78.6376841 |
| cg12455762 | 0.01991565 | 8.00927615 | 1.38940295 | 46.1698348 | cg19263607 | 0.03802024 | 13.230867  | 1.15343764 | 151.768797 |
| cg17597195 | 0.01991893 | 433973050  | 23.1795039 | 8.125E+15  | cg26484631 | 0.03802188 | 18.574424  | 1.1752418  | 293.564462 |
| cg24463605 | 0.01992387 | 10.4185962 | 1.44818818 | 74.9537581 | cg15841063 | 0.0380296  | 3.71317825 | 1.0751416  | 12.8240714 |
| cg18509271 | 0.0199261  | 3.026E+10  | 45.2826566 | 2.0221E+19 | cg05633748 | 0.03804108 | 40.4874328 | 1.22652906 | 1336.48054 |
| cg25641997 | 0.01993399 | 109325.554 | 6.24922583 | 1912569196 | cg08114317 | 0.0380445  | 9.78947176 | 1.1340828  | 84.503316  |
| cg18039296 | 0.01993602 | 0.04256408 | 0.00298263 | 0.60741742 | cg19224203 | 0.03806583 | 85633.4429 | 1.86870576 | 3924152587 |
| cg08274661 | 0.01993709 | 502863.726 | 7.95020889 | 3.1807E+10 | cg20244273 | 0.03808768 | 18.6996266 | 1.17456687 | 297.706365 |
| cg23858195 | 0.01993993 | 3951.68522 | 3.69775249 | 4223056.06 | cg10013356 | 0.03809262 | 329.077732 | 1.37482006 | 78768.2381 |
| cg16117513 | 0.01994135 | 12.2598413 | 1.48546705 | 101.182796 | cg20417723 | 0.03811189 | 0.18027616 | 0.03570005 | 0.91034859 |
| cg18342279 | 0.01994173 | 3.94951374 | 1.24218965 | 12.5573891 | cg27422678 | 0.03812847 | 1285384.49 | 2.15985078 | 7.6497E+11 |
| cg09555914 | 0.01994269 | 5.28258942 | 1.3005442  | 21.4569801 | cg12894325 | 0.03813427 | 62.2010328 | 1.25356241 | 3086.37882 |
| cg05104080 | 0.01994732 | 49.0675696 | 1.84881812 | 1302.25162 | cg20437660 | 0.0381352  | 0.18680864 | 0.03825211 | 0.91230172 |
| cg11625005 | 0.01995587 | 0.13419263 | 0.02472269 | 0.72838586 | cg01189638 | 0.03814342 | 27.2394578 | 1.19801193 | 619.349476 |
| cg22416721 | 0.01995922 | 235.887439 | 2.36778636 | 23499.9598 | cg22243298 | 0.03814878 | 0.18000407 | 0.03558428 | 0.91055558 |

|            |            |            |            |            |            |            |            |            |            |
|------------|------------|------------|------------|------------|------------|------------|------------|------------|------------|
| cg20587394 | 0.01997921 | 0.07639627 | 0.00875408 | 0.66670494 | cg13053082 | 0.03815845 | 19.7113978 | 1.17675423 | 330.178719 |
| cg11960229 | 0.01998191 | 16.3724632 | 1.55368833 | 172.529809 | cg00807892 | 0.03816556 | 202784.301 | 1.94784966 | 2.1111E+10 |
| cg23378144 | 0.01998531 | 283.490167 | 2.43502147 | 33004.5036 | cg25980157 | 0.03817989 | 4.6975E+18 | 10.4097082 | 2.12E+36   |
| cg03400491 | 0.01999726 | 6100.99498 | 3.94680175 | 9430962.61 | cg17557230 | 0.03819176 | 1634.54903 | 1.49593441 | 1786007.8  |
| cg15030629 | 0.02000136 | 39800516.2 | 15.7347621 | 1.0067E+14 | cg17067942 | 0.03820749 | 65644.0352 | 1.8274261  | 2358037543 |
| cg08091561 | 0.0200069  | 0.06218121 | 0.00598759 | 0.64575248 | cg23717805 | 0.03821133 | 5741146.14 | 2.32948399 | 1.4149E+13 |
| cg20941855 | 0.02002121 | 8.54512485 | 1.4015385  | 52.0992884 | cg24404909 | 0.03822159 | 57.369049  | 1.24586751 | 2641.69966 |
| cg24153071 | 0.02002742 | 411080.723 | 7.64029061 | 2.2118E+10 | cg07796520 | 0.03823301 | 725952490  | 3.02363376 | 1.743E+17  |
| cg17980283 | 0.02003146 | 47.462274  | 1.83508103 | 1227.55748 | cg02015348 | 0.03823584 | 52.105312  | 1.23903368 | 2191.19431 |
| cg25000158 | 0.02003393 | 2422723053 | 29.9089546 | 1.9625E+17 | cg19877419 | 0.0382437  | 18.3162369 | 1.17062493 | 286.585844 |
| cg02005367 | 0.02003484 | 5.1126E+13 | 143.144441 | 1.83E+25   | cg04295543 | 0.03826254 | 23.2174185 | 1.18541642 | 454.733469 |
| cg03473046 | 0.02004028 | 635.006601 | 2.75836565 | 146185.616 | cg12959265 | 0.038263   | 0.19556638 | 0.04177511 | 0.91552621 |
| cg24406391 | 0.02004373 | 45.0807577 | 1.81970594 | 1116.8149  | cg06435751 | 0.03827332 | 12920.7331 | 1.66780294 | 100098963  |
| cg11930554 | 0.02006254 | 3.43366341 | 1.21381008 | 9.71325295 | cg23939875 | 0.0382786  | 9.92086176 | 1.13193284 | 86.9517117 |
| cg09677935 | 0.02006428 | 123127428  | 18.648561  | 8.1295E+14 | cg01158680 | 0.03828985 | 5.90874328 | 1.1005852  | 31.7224391 |
| cg11320084 | 0.02007701 | 25.7058355 | 1.6646901  | 396.944739 | cg25733934 | 0.03829205 | 120.866764 | 1.29515625 | 11279.5461 |
| cg04566159 | 0.02008344 | 10.7627451 | 1.45189932 | 79.7828608 | cg08986653 | 0.03829644 | 0.00492517 | 3.23E-05   | 0.75088941 |
| cg21483820 | 0.02008649 | 8798.66632 | 4.15818363 | 18617871.6 | cg18426551 | 0.03830943 | 0.13261132 | 0.0196072  | 0.89690318 |
| cg02026498 | 0.02009949 | 11.8286381 | 1.47317947 | 94.9759905 | cg17808849 | 0.03830948 | 67.6517474 | 1.25479094 | 3647.42747 |
| cg23837191 | 0.02010265 | 0.11411034 | 0.01830031 | 0.71152738 | cg16430951 | 0.03831854 | 270236873  | 2.84266439 | 2.569E+16  |
| cg02825728 | 0.02010392 | 0.15768752 | 0.03321777 | 0.74855572 | cg12738981 | 0.0383222  | 7.50624246 | 1.11453114 | 50.5537028 |
| cg18806716 | 0.02010472 | 17.7703127 | 1.57011173 | 201.122001 | cg19319928 | 0.03836293 | 11.0097246 | 1.13719112 | 106.590734 |
| cg03029145 | 0.02011056 | 11444605.4 | 12.7757809 | 1.0252E+13 | cg20791007 | 0.03837577 | 12.5424398 | 1.14498091 | 137.393379 |
| cg22929802 | 0.02011119 | 20454.3687 | 4.73879464 | 88288527.3 | cg25382652 | 0.03839377 | 0.04047657 | 0.00194466 | 0.84248815 |
| cg17833578 | 0.02011638 | 0.11807412 | 0.01948526 | 0.71548937 | cg10042437 | 0.03840056 | 175.816104 | 1.31798286 | 23453.4934 |
| cg09418959 | 0.0201174  | 5237389695 | 33.3391428 | 8.2276E+17 | cg13975172 | 0.03841591 | 561.302283 | 1.4016182  | 224783.22  |
| cg08314603 | 0.02013487 | 18.1789332 | 1.57478531 | 209.853123 | cg26706909 | 0.03841931 | 2330.34192 | 1.51198342 | 3591635.59 |
| cg11609545 | 0.02014285 | 12376006.3 | 12.8873257 | 1.1885E+13 | cg12631255 | 0.03842192 | 375428.787 | 1.98224152 | 7.1105E+10 |
| cg25372693 | 0.0201438  | 103.840837 | 2.0682262  | 5213.60738 | cg09205065 | 0.03842714 | 18416875.3 | 2.43834533 | 1.391E+14  |
| cg14581491 | 0.02014615 | 1.5797E+10 | 39.4547211 | 6.3248E+18 | cg08739433 | 0.03843175 | 8.53538472 | 1.12097309 | 64.9906703 |

|            |            |            |            |            |            |            |            |            |            |
|------------|------------|------------|------------|------------|------------|------------|------------|------------|------------|
| cg12843518 | 0.02014707 | 9.71227745 | 1.42728854 | 66.089183  | cg26827725 | 0.03843413 | 11.4553554 | 1.13864528 | 115.246749 |
| cg20065569 | 0.02014745 | 4925.19144 | 3.78303073 | 6412189.7  | cg26397391 | 0.03844491 | 82.6070512 | 1.26465912 | 5395.86107 |
| cg13940125 | 0.02014825 | 9.79185997 | 1.42908631 | 67.0921841 | cg07485417 | 0.03846406 | 16.6148305 | 1.16093697 | 237.784307 |
| cg19966212 | 0.02015241 | 4.72022213 | 1.27481758 | 17.4774    | cg12468273 | 0.03846746 | 6.59311713 | 1.10530045 | 39.3279434 |
| cg01414687 | 0.02015964 | 7.53682723 | 1.37151915 | 41.4166764 | cg07882671 | 0.03847996 | 2.83564099 | 1.05681938 | 7.60854692 |
| cg11068617 | 0.0201613  | 1.847E+13  | 118.815464 | 2.87E+24   | cg08325021 | 0.03850434 | 5.3122E+10 | 3.69322374 | 7.64E+20   |
| cg26916966 | 0.02016718 | 4.68674051 | 1.27320208 | 17.2521997 | cg09508736 | 0.03851527 | 0.06935905 | 0.00553929 | 0.86846433 |
| cg17192377 | 0.02017226 | 67.5656994 | 1.93211529 | 2362.75949 | cg09245319 | 0.03853271 | 20.1902574 | 1.17183372 | 347.870597 |
| cg06997549 | 0.02017355 | 7.43877452 | 1.36845445 | 40.4363961 | cg03041742 | 0.03855045 | 4044580677 | 3.20683424 | 5.1012E+18 |
| cg07737104 | 0.02017515 | 7475.62928 | 4.03157121 | 13861849.4 | cg01926269 | 0.03855499 | 9.20581337 | 1.12399415 | 75.3980788 |
| cg10219093 | 0.02018528 | 1828.6662  | 3.23346285 | 1034191.58 | cg20928429 | 0.03855757 | 6.406925   | 1.10271968 | 37.2249527 |
| cg22568860 | 0.02018853 | 1874.88136 | 3.24555772 | 1083074.29 | cg16512239 | 0.03857518 | 7497029.43 | 2.29789376 | 2.446E+13  |
| cg07705594 | 0.02018889 | 31862.3753 | 5.05209166 | 200948642  | cg03086857 | 0.03858052 | 10.1877516 | 1.12968213 | 91.8756516 |
| cg27303409 | 0.02018893 | 771.757618 | 2.82528115 | 210814.354 | cg12234455 | 0.03858682 | 17.7439976 | 1.16299186 | 270.723692 |
| cg23540518 | 0.0201911  | 6.89621109 | 1.35203967 | 35.1748018 | cg06299833 | 0.03858816 | 4.19692886 | 1.07820306 | 16.3366369 |
| cg13362105 | 0.0201985  | 104018531  | 17.8590035 | 6.0585E+14 | cg21739584 | 0.0385941  | 38.3806445 | 1.21090902 | 1216.50251 |
| cg18233786 | 0.02021282 | 38.9663004 | 1.77104391 | 857.33197  | cg13547250 | 0.03859651 | 141021220  | 2.67584992 | 7.432E+15  |
| cg08378567 | 0.02021283 | 62.4975376 | 1.90654411 | 2048.70277 | cg26608667 | 0.03860808 | 0.13335904 | 0.01976476 | 0.89981528 |
| cg04994773 | 0.02021516 | 6.94150932 | 1.35299682 | 35.6132038 | cg19942640 | 0.03861329 | 7566410.77 | 2.29224938 | 2.4976E+13 |
| cg00374927 | 0.02021946 | 10031122.2 | 12.366783  | 8.1366E+12 | cg01973862 | 0.03862145 | 179439.959 | 1.88343129 | 1.7096E+10 |
| cg09251771 | 0.02022766 | 7588.09287 | 4.02820416 | 14294000.8 | cg24341129 | 0.03863358 | 10.4784036 | 1.13066537 | 97.1082562 |
| cg01280841 | 0.02023164 | 4.39799265 | 1.25979254 | 15.3535909 | cg14597908 | 0.03863415 | 54.5145741 | 1.23244693 | 2411.33205 |
| cg24380059 | 0.02023533 | 8.31456181 | 1.3912412  | 49.690836  | cg04387010 | 0.0386492  | 76.9952973 | 1.2544921  | 4725.63822 |
| cg18576957 | 0.02023731 | 6.00452583 | 1.32237308 | 27.2648702 | cg25250998 | 0.03865001 | 105.335386 | 1.27515932 | 8701.29977 |
| cg12804532 | 0.02024632 | 99.7565441 | 2.04873358 | 4857.32659 | cg26945941 | 0.0386512  | 0.1552841  | 0.02657461 | 0.90737556 |
| cg07106615 | 0.02025982 | 10.2487841 | 1.4367997  | 73.1052316 | cg17261676 | 0.03870227 | 8.73294123 | 1.11913498 | 68.1457229 |
| cg01826863 | 0.02026143 | 4.19416843 | 1.25014526 | 14.0712039 | cg19792268 | 0.03873306 | 17.0026866 | 1.15804857 | 249.636638 |
| cg00087884 | 0.02027093 | 17.896401  | 1.56676759 | 204.42162  | cg12687767 | 0.03873343 | 13.0647552 | 1.1423503  | 149.418116 |
| cg26632171 | 0.02027314 | 10.1342071 | 1.43398783 | 71.6199612 | cg23489936 | 0.03875176 | 11099569.5 | 2.31326471 | 5.3258E+13 |
| cg17056132 | 0.02027917 | 22.9830384 | 1.62869587 | 324.320866 | cg18632220 | 0.03877482 | 0.1176061  | 0.01544585 | 0.89546331 |

|            |            |            |            |            |            |            |            |            |            |
|------------|------------|------------|------------|------------|------------|------------|------------|------------|------------|
| cg10715905 | 0.02028589 | 17.2524102 | 1.55740765 | 191.116089 | cg06467910 | 0.0387765  | 14.2081112 | 1.14668609 | 176.046806 |
| cg02011054 | 0.02028717 | 101673.005 | 6.00993017 | 1720053248 | cg20729316 | 0.03877711 | 18123953.9 | 2.36776419 | 1.3873E+14 |
| cg22243298 | 0.02029867 | 0.18318609 | 0.04369027 | 0.76806903 | cg12217560 | 0.03877875 | 8.5635855  | 1.11710381 | 65.647432  |
| cg09960727 | 0.02030951 | 3976708.31 | 10.6062149 | 1.491E+12  | cg10124812 | 0.03879398 | 43.5567131 | 1.21450243 | 1562.11071 |
| cg12616721 | 0.02032214 | 79735.1021 | 5.77158561 | 1101549372 | cg21856334 | 0.0388113  | 0.12022992 | 0.01611832 | 0.89682024 |
| cg02862025 | 0.02033148 | 1509.7258  | 3.11550003 | 731591.064 | cg27636594 | 0.03881187 | 32.0061603 | 1.19502413 | 857.21641  |
| cg10535858 | 0.02033838 | 1424048.05 | 9.01687789 | 2.249E+11  | cg08730245 | 0.03881499 | 0.02856986 | 0.00097987 | 0.83300816 |
| cg19643053 | 0.02033864 | 4.64484573 | 1.26915879 | 16.9991273 | cg01793704 | 0.038823   | 150.072251 | 1.29346641 | 17411.879  |
| cg17873465 | 0.02034157 | 246343196  | 20.0551948 | 3.0259E+15 | cg07689503 | 0.03882491 | 811.426127 | 1.41047617 | 466801.475 |
| cg27380724 | 0.02034513 | 0.1226347  | 0.02082749 | 0.7220876  | cg00473633 | 0.03883803 | 6.78081918 | 1.10312923 | 41.6809813 |
| cg25466368 | 0.02034959 | 33379621.9 | 14.6930645 | 7.5832E+13 | cg02608453 | 0.03891784 | 0.03926323 | 0.00181771 | 0.8481018  |
| cg23650853 | 0.02035438 | 34258.2761 | 5.05043374 | 232381918  | cg05889842 | 0.03891787 | 76761.6016 | 1.77257311 | 3324175156 |
| cg08702399 | 0.0203643  | 1.5199E+10 | 37.8868533 | 6.0971E+18 | cg18679410 | 0.03891802 | 8.43470695 | 1.11462004 | 63.8282812 |
| cg16094298 | 0.02037262 | 15.8064872 | 1.53387075 | 162.885326 | cg22171758 | 0.03892233 | 77.2838896 | 1.24750874 | 4787.78174 |
| cg09372028 | 0.02038887 | 2213.93065 | 3.29646945 | 1486890.45 | cg04062119 | 0.03893896 | 12.0254155 | 1.13463312 | 127.451434 |
| cg27256066 | 0.02039251 | 11.2577197 | 1.45481325 | 87.115136  | cg01958916 | 0.03896492 | 108.385705 | 1.2679273  | 9265.09038 |
| cg01029838 | 0.02039774 | 11947233.2 | 12.4623461 | 1.1453E+13 | cg19552441 | 0.038968   | 8.01103735 | 1.11113937 | 57.7575786 |
| cg17558126 | 0.0203993  | 7.56910057 | 1.36795455 | 41.8809847 | cg20941170 | 0.03898269 | 23230148.1 | 2.35797017 | 2.2886E+14 |
| cg11668770 | 0.02040112 | 7.18E-06   | 3.22E-10   | 0.15987228 | cg17906146 | 0.03898522 | 16754.3351 | 1.63524776 | 171660681  |
| cg10502118 | 0.02040592 | 5.91398609 | 1.31658478 | 26.5651191 | cg09689449 | 0.03899015 | 90.417888  | 1.25564477 | 6510.91351 |
| cg10959672 | 0.02040771 | 8.61445105 | 1.39545457 | 53.1789197 | cg27061971 | 0.03899997 | 0.02865489 | 0.00098242 | 0.83579962 |
| cg13946792 | 0.0204088  | 0.24544868 | 0.07487098 | 0.80465166 | cg05241277 | 0.03900922 | 0.12304794 | 0.01682872 | 0.89969979 |
| cg05178518 | 0.02040986 | 239542121  | 19.7920802 | 2.8992E+15 | cg17374636 | 0.03901346 | 56591.7337 | 1.73644434 | 1844357603 |
| cg26626663 | 0.02041216 | 5.69843638 | 1.30894644 | 24.8078732 | cg22973515 | 0.03902966 | 108.944889 | 1.26638986 | 9372.30249 |
| cg01725531 | 0.02042269 | 23420673   | 13.7917282 | 3.9772E+13 | cg11195360 | 0.0390385  | 0.23117655 | 0.05752861 | 0.9289743  |
| cg21502048 | 0.02042409 | 9.52583803 | 1.41698836 | 64.0383454 | cg25879745 | 0.03904464 | 19.2543373 | 1.16032316 | 319.505391 |
| cg22725685 | 0.02042683 | 4.53494136 | 1.2633176  | 16.2791155 | cg07059157 | 0.03906433 | 0.01835098 | 0.00041157 | 0.81822412 |
| cg01782132 | 0.02044599 | 8362805.85 | 11.7320603 | 5.9611E+12 | cg15819780 | 0.03909781 | 41.0217991 | 1.2041414  | 1397.50032 |
| cg15299978 | 0.0204473  | 8.15998735 | 1.38302826 | 48.1446368 | cg04425270 | 0.03912303 | 541.248695 | 1.3689293  | 213999.473 |
| cg17802464 | 0.02045289 | 9.64306034 | 1.41904864 | 65.5288411 | cg03851496 | 0.03913503 | 18.7365583 | 1.15724683 | 303.356733 |

|            |            |            |            |            |            |            |            |            |            |
|------------|------------|------------|------------|------------|------------|------------|------------|------------|------------|
| cg00009167 | 0.0204572  | 14.4418138 | 1.51026346 | 138.099075 | cg23395902 | 0.03913718 | 19519027.4 | 2.30808988 | 1.6507E+14 |
| cg20070464 | 0.02046827 | 444.503385 | 2.56242672 | 77107.8672 | cg07204255 | 0.03914438 | 3.87191583 | 1.06972793 | 14.0145282 |
| cg24003225 | 0.02047363 | 67.8447377 | 1.9168824  | 2401.24717 | cg21367811 | 0.0391489  | 5.62718202 | 1.08978592 | 29.0563284 |
| cg01993865 | 0.02047557 | 9.327E+12  | 100.23266  | 8.68E+23   | cg18665732 | 0.03915353 | 1.0154E+14 | 4.97486124 | 2.07E+27   |
| cg15127250 | 0.02048135 | 12.352994  | 1.47366746 | 103.548775 | cg06319102 | 0.03916753 | 61.9465659 | 1.22751013 | 3126.14692 |
| cg14600813 | 0.02048503 | 10.1620422 | 1.42986838 | 72.2214044 | cg22068044 | 0.03918792 | 58384.9377 | 1.72311045 | 1978283484 |
| cg02504465 | 0.02048529 | 1.2773E+11 | 51.6161824 | 3.16E+20   | cg21401879 | 0.03919368 | 3.86411787 | 1.06927538 | 13.9640425 |
| cg26433208 | 0.02048877 | 101686.249 | 5.91686729 | 1747562140 | cg18357908 | 0.03921498 | 12647.4587 | 1.59529028 | 100269032  |
| cg24091990 | 0.02049086 | 7.22320742 | 1.35643599 | 38.4645687 | cg22052291 | 0.03921609 | 397.294865 | 1.34434071 | 117413.099 |
| cg19708554 | 0.02049313 | 9.96766457 | 1.42543797 | 69.7009195 | cg25429672 | 0.03924699 | 10.1800612 | 1.12118177 | 92.43251   |
| cg12387232 | 0.02050377 | 0.26541511 | 0.0864213  | 0.81513682 | cg17381426 | 0.03931182 | 7.40170956 | 1.10301186 | 49.6688262 |
| cg08486961 | 0.02050599 | 539688555  | 22.1533541 | 1.3148E+16 | cg03109066 | 0.03931272 | 2.9838E+12 | 4.08286111 | 2.18E+24   |
| cg20012172 | 0.02050679 | 979005470  | 24.2796592 | 3.9476E+16 | cg02490920 | 0.03931824 | 21.9471245 | 1.16321369 | 414.090962 |
| cg04352704 | 0.02050936 | 3354.99696 | 3.49265201 | 3222767.27 | cg06693487 | 0.03932149 | 4.66E-05   | 3.53E-09   | 0.61379288 |
| cg25133212 | 0.02051043 | 48262.6429 | 5.26631371 | 442298509  | cg05986853 | 0.03933333 | 9.2543263  | 1.11488834 | 76.817159  |
| cg22501294 | 0.0205191  | 164.806233 | 2.19479645 | 12375.2224 | cg23514672 | 0.03933348 | 0.00121071 | 2.04E-06   | 0.72016474 |
| cg05446860 | 0.02052236 | 4.50588914 | 1.26084622 | 16.1027068 | cg10310846 | 0.03934601 | 1573859613 | 2.81157816 | 8.8101E+17 |
| cg08416638 | 0.02052406 | 0.03717325 | 0.00229396 | 0.6023871  | cg14112356 | 0.03935463 | 41.0731322 | 1.19866737 | 1407.39811 |
| cg13319446 | 0.02052406 | 5.58733256 | 1.30328085 | 23.9536129 | cg22213149 | 0.03935731 | 3829.41642 | 1.49525398 | 9807317.27 |
| cg04414912 | 0.02053026 | 0.2333643  | 0.06813004 | 0.79933745 | cg04747728 | 0.03935735 | 199.463595 | 1.2946188  | 30731.6142 |
| cg10978355 | 0.02053762 | 5.19737311 | 1.28865174 | 20.9619764 | cg13883696 | 0.03935779 | 5.18449    | 1.08354684 | 24.8064372 |
| cg00694520 | 0.02055877 | 6.68071745 | 1.33904863 | 33.3311163 | cg13714271 | 0.03937563 | 1751.26974 | 1.43833486 | 2132289.08 |
| cg16274678 | 0.02055967 | 8.15381025 | 1.38068258 | 48.1534443 | cg07476963 | 0.03937864 | 39.7381168 | 1.19622588 | 1320.08341 |
| cg14519515 | 0.02057335 | 30.5167102 | 1.6906995  | 550.819114 | cg21911557 | 0.03938586 | 6.024E+14  | 5.23159942 | 6.94E+28   |
| cg19783435 | 0.02058369 | 178.403083 | 2.21677977 | 14357.6104 | cg10187703 | 0.03939651 | 13.7763617 | 1.13587071 | 167.086043 |
| cg25924411 | 0.02058659 | 198306.157 | 6.50653564 | 6043973947 | cg16458866 | 0.03940475 | 7.84810088 | 1.10515699 | 55.7320706 |
| cg03861105 | 0.02058722 | 641.824227 | 2.69796994 | 152684.554 | cg04881642 | 0.03940986 | 24.32341   | 1.16743093 | 506.777966 |
| cg19038228 | 0.02059073 | 307555.959 | 6.95761942 | 1.3595E+10 | cg04525496 | 0.0394118  | 8.31848711 | 1.10820348 | 62.4409046 |
| cg07654559 | 0.02059619 | 20627.3109 | 4.59367258 | 92624354.2 | cg01802294 | 0.03941409 | 8.01283723 | 1.10616785 | 58.0432351 |
| cg16674484 | 0.02059883 | 6.24089939 | 1.32445347 | 29.4074696 | cg24333469 | 0.03941522 | 6.47725071 | 1.09480482 | 38.3216953 |

|            |            |            |            |            |            |            |            |            |            |
|------------|------------|------------|------------|------------|------------|------------|------------|------------|------------|
| cg14832904 | 0.02060109 | 7.20958656 | 1.35406606 | 38.3867078 | cg25920207 | 0.03942789 | 10991.4868 | 1.56915404 | 76992302.2 |
| cg13344867 | 0.02060562 | 63602.2057 | 5.45646214 | 741366927  | cg23413007 | 0.03942835 | 11680.7593 | 1.57374893 | 86697525.6 |
| cg27147545 | 0.02061207 | 71.1278968 | 1.9232935  | 2630.47617 | cg03005685 | 0.03943429 | 37.0242739 | 1.19095861 | 1151.00294 |
| cg19870284 | 0.02061321 | 0.19366379 | 0.0482432  | 0.77742897 | cg24176760 | 0.03943538 | 105.216196 | 1.25266474 | 8837.51859 |
| cg22776646 | 0.02062563 | 11.1652449 | 1.44749018 | 86.1233428 | cg07774177 | 0.0394354  | 129.197585 | 1.26517053 | 13193.491  |
| cg25672318 | 0.0206297  | 9.6508E+12 | 97.7013261 | 9.53E+23   | cg01664011 | 0.03943852 | 1611647.76 | 1.99633545 | 1.3011E+12 |
| cg27539480 | 0.02063433 | 15.2755574 | 1.51849168 | 153.66739  | cg18284650 | 0.03944426 | 949781.492 | 1.94518287 | 4.6375E+11 |
| cg10124812 | 0.02064214 | 42.8001227 | 1.77781046 | 1030.39696 | cg00534253 | 0.03945187 | 52694490.1 | 2.36041833 | 1.1764E+15 |
| cg20163085 | 0.02064374 | 4.67E-05   | 1.00E-08   | 0.21710113 | cg02325250 | 0.03945634 | 8.9152269  | 1.11140999 | 71.5139072 |
| cg07000955 | 0.02064583 | 39.0383033 | 1.75277641 | 869.471496 | cg07879540 | 0.03948356 | 820.811928 | 1.38141014 | 487713.391 |
| cg19245296 | 0.02065375 | 34718.7286 | 4.95584928 | 243225741  | cg16985259 | 0.03948823 | 7.7281E+13 | 4.66021782 | 1.28E+27   |
| cg23709172 | 0.02065541 | 7.93060625 | 1.37298396 | 45.808631  | cg21073212 | 0.03950078 | 20.243034  | 1.15555175 | 354.618843 |
| cg07247133 | 0.02066233 | 96.876447  | 2.0135281  | 4660.99578 | cg21785847 | 0.03951792 | 30.1354848 | 1.17753355 | 771.228507 |
| cg07484354 | 0.02066682 | 9.89761685 | 1.42010219 | 68.9829365 | cg05376156 | 0.03951889 | 50926.2206 | 1.68205326 | 1541853639 |
| cg25804860 | 0.02066737 | 19.434368  | 1.57453024 | 239.877678 | cg06820762 | 0.03953319 | 8818.1356  | 1.54535266 | 50318297.8 |
| cg11587658 | 0.02067058 | 15829.3676 | 4.38962001 | 57082134.1 | cg11386080 | 0.03954842 | 11.797112  | 1.12530768 | 123.674489 |
| cg10802521 | 0.02067514 | 409080.843 | 7.21629882 | 2.319E+10  | cg13662121 | 0.03957944 | 11.6099562 | 1.12403474 | 119.917185 |
| cg27167413 | 0.02067539 | 1337.03134 | 3.00698771 | 594499.541 | cg26394572 | 0.03958824 | 52287.5907 | 1.67807496 | 1629243150 |
| cg21476824 | 0.02067621 | 1328.71949 | 3.00400283 | 587714.322 | cg06381959 | 0.03960016 | 48.6117675 | 1.20300946 | 1964.32699 |
| cg16511831 | 0.02067979 | 7.99079545 | 1.37410925 | 46.4685119 | cg04589156 | 0.03960739 | 2919334209 | 2.81907267 | 3.0232E+18 |
| cg12104707 | 0.02067991 | 81.3873792 | 1.95954387 | 3380.33029 | cg23284178 | 0.03961503 | 34656.7886 | 1.64329326 | 730906053  |
| cg07759857 | 0.02068274 | 5.4244924  | 1.29503485 | 22.7214872 | cg04123157 | 0.03962447 | 4923.43278 | 1.49718609 | 16190499.3 |
| cg14095316 | 0.02068526 | 11.5896531 | 1.45437215 | 92.3560446 | cg11050622 | 0.03964184 | 7712.50346 | 1.52828368 | 38921249   |
| cg24050414 | 0.02069034 | 156.408251 | 2.16463628 | 11301.4557 | cg07028533 | 0.03968117 | 4.10062172 | 1.06887085 | 15.7316466 |
| cg20615910 | 0.02069218 | 10.688237  | 1.43632293 | 79.5353249 | cg10335067 | 0.03972056 | 215421.412 | 1.78118339 | 2.6054E+10 |
| cg02359414 | 0.02069261 | 2808059130 | 27.7979524 | 2.8366E+17 | cg17278655 | 0.03972809 | 1.0668E+10 | 2.95828642 | 3.8473E+19 |
| cg07537750 | 0.02069326 | 31.0933411 | 1.69090799 | 571.761363 | cg27123665 | 0.03974511 | 172.759209 | 1.27325031 | 23440.5945 |
| cg00609961 | 0.02069504 | 10.7178341 | 1.43686504 | 79.9462465 | cg15077012 | 0.03974627 | 33309.1255 | 1.62943908 | 680907837  |
| cg10588471 | 0.02069535 | 0.0300491  | 0.00154266 | 0.58531901 | cg08767936 | 0.03975343 | 7.35556852 | 1.09799663 | 49.2755504 |
| cg06633426 | 0.02070532 | 8.00600361 | 1.37402206 | 46.6485187 | cg27299725 | 0.03976716 | 160794344  | 2.42059497 | 1.0681E+16 |



|            |            |            |            |            |            |            |            |            |            |
|------------|------------|------------|------------|------------|------------|------------|------------|------------|------------|
| cg02140384 | 0.02070586 | 7.51979959 | 1.36092578 | 41.5506759 | cg21916655 | 0.03976842 | 3101.8321  | 1.45656771 | 6605502.97 |
| cg03216729 | 0.02070704 | 84241.9441 | 5.65329488 | 1255321950 | cg04016086 | 0.03977146 | 0.01596837 | 0.00030942 | 0.82409733 |
| cg07491796 | 0.02072219 | 39.8231907 | 1.75483194 | 903.725582 | cg12080566 | 0.03977527 | 11.5704053 | 1.12125963 | 119.396324 |
| cg04425270 | 0.02072609 | 686.913529 | 2.70978368 | 174128.363 | cg07105947 | 0.03978288 | 6.07541902 | 1.08792653 | 33.9275819 |
| cg00501919 | 0.02072948 | 24.3451602 | 1.62759603 | 364.148605 | cg04436474 | 0.03979058 | 6926.06123 | 1.51091702 | 31749145.4 |
| cg16705300 | 0.02073483 | 8.90200374 | 1.39586804 | 56.7716063 | cg16513905 | 0.03980764 | 5206.95815 | 1.4898861  | 18197641.5 |
| cg12030002 | 0.02074052 | 38.4876073 | 1.74494034 | 848.909206 | cg15522728 | 0.03981485 | 26054.3554 | 1.60538637 | 422844899  |
| cg16537676 | 0.02074205 | 18.1117615 | 1.55539768 | 210.901629 | cg08756266 | 0.03982848 | 20.7348764 | 1.151363   | 373.414031 |
| cg13327336 | 0.02074482 | 0.02784033 | 0.00133817 | 0.57921335 | cg19865525 | 0.03984239 | 96.5428204 | 1.23633184 | 7538.84669 |
| cg03033975 | 0.0207538  | 521.702975 | 2.59537219 | 104868.965 | cg11527279 | 0.03985673 | 10.8210328 | 1.1167135  | 104.856574 |
| cg11479221 | 0.02075803 | 9.83480545 | 1.41674936 | 68.2713549 | cg15149938 | 0.03986209 | 0.16274897 | 0.02881144 | 0.91933033 |
| cg27207079 | 0.02076647 | 9.48200414 | 1.40870593 | 63.8234005 | cg17929627 | 0.03987146 | 25287.3927 | 1.59873848 | 399973000  |
| cg06484562 | 0.02077075 | 261100.606 | 6.68403268 | 1.0199E+10 | cg16167624 | 0.03987375 | 9.89294656 | 1.11187298 | 88.0229968 |
| cg24291500 | 0.02077421 | 18.7150413 | 1.56220919 | 224.203501 | cg22486630 | 0.03987565 | 15.116664  | 1.13387295 | 201.533628 |
| cg22584335 | 0.0207777  | 137735.385 | 6.06031067 | 3130373547 | cg23633635 | 0.03988264 | 30172213.6 | 2.21703803 | 4.1062E+14 |
| cg19035395 | 0.02077893 | 8.78659556 | 1.39220362 | 55.4547197 | cg15726532 | 0.03988498 | 8422.49474 | 1.51853302 | 46715097.4 |
| cg05124756 | 0.02078232 | 15215.9252 | 4.33198903 | 53445282.9 | cg19119531 | 0.03990429 | 9142068.82 | 2.09448048 | 3.9904E+13 |
| cg04362989 | 0.02078768 | 6.42355146 | 1.32721702 | 31.0891232 | cg07676709 | 0.03990437 | 16.9618283 | 1.13948513 | 252.485629 |
| cg13676983 | 0.02078818 | 166179944  | 17.8291218 | 1.5489E+15 | cg26266703 | 0.03993667 | 1139.02376 | 1.38199492 | 938769.822 |
| cg04238038 | 0.02079253 | 10.7476989 | 1.43526162 | 80.482213  | cg12901910 | 0.0399684  | 8.36215008 | 1.10219327 | 63.442189  |
| cg06664023 | 0.0207954  | 6766893166 | 31.3085284 | 1.4626E+18 | cg15746415 | 0.0399724  | 36329.6353 | 1.61751903 | 815967152  |
| cg00604539 | 0.02080444 | 8.8355E+10 | 46.214324  | 1.69E+20   | cg00684824 | 0.03997413 | 15.5908145 | 1.13402003 | 214.34674  |
| cg15011837 | 0.0208056  | 31.4172947 | 1.68922674 | 584.318485 | cg03861105 | 0.03997749 | 507.962948 | 1.33000967 | 194003.369 |
| cg18929217 | 0.02080723 | 8.30692228 | 1.37980456 | 50.0106752 | cg22864519 | 0.03999921 | 6.15353245 | 1.08652201 | 34.8506162 |
| cg12955299 | 0.02080799 | 15498440.1 | 12.3987417 | 1.9373E+13 | cg26817935 | 0.04000363 | 6.0087648  | 1.0853001  | 33.2675305 |
| cg13634292 | 0.02080976 | 2.01E-08   | 5.95E-15   | 0.06753557 | cg06084073 | 0.04000674 | 17.9628362 | 1.14088207 | 282.819313 |
| cg04881642 | 0.0208146  | 21.5288141 | 1.59457381 | 290.666908 | cg19189310 | 0.0400125  | 68455.5199 | 1.66157565 | 2820309875 |
| cg00720475 | 0.0208207  | 122.624355 | 2.07691666 | 7239.93058 | cg16559243 | 0.0400175  | 8.13336915 | 1.10024974 | 60.1242528 |
| cg17635080 | 0.02082277 | 5.56800852 | 1.29813608 | 23.8824877 | cg24718991 | 0.04003248 | 2923100.54 | 1.96904979 | 4.3394E+12 |
| cg19378537 | 0.02082733 | 55.3202866 | 1.83994337 | 1663.27625 | cg19675288 | 0.04004422 | 4.30031956 | 1.06854931 | 17.3064061 |

|            |            |            |            |            |            |            |            |            |            |
|------------|------------|------------|------------|------------|------------|------------|------------|------------|------------|
| cg21791967 | 0.02082876 | 2569.54574 | 3.29642114 | 2002949.57 | cg15694117 | 0.04004965 | 0.14965109 | 0.02441369 | 0.91733154 |
| cg01084871 | 0.02082933 | 321793.626 | 6.86623291 | 1.5081E+10 | cg14844588 | 0.0400537  | 12.3613142 | 1.12095473 | 136.314237 |
| cg07918226 | 0.02083393 | 1033892.8  | 8.19489042 | 1.3044E+11 | cg27123975 | 0.04008036 | 7912.43457 | 1.50146334 | 41697069.2 |
| cg16792632 | 0.02083402 | 34.2209164 | 1.71018774 | 684.761732 | cg26763524 | 0.04012787 | 458.08489  | 1.31789598 | 159224.832 |
| cg13414916 | 0.0208393  | 42226459.6 | 14.387444  | 1.2393E+14 | cg14688451 | 0.04013545 | 59.2393524 | 1.20169819 | 2920.28473 |
| cg00157796 | 0.02084003 | 3.98202002 | 1.23346221 | 12.8552649 | cg00976340 | 0.04015592 | 107.965173 | 1.23404329 | 9445.76142 |
| cg26866325 | 0.02085055 | 5.42804593 | 1.29271987 | 22.7920087 | cg15034464 | 0.04015993 | 5.1369E+13 | 4.1265724  | 6.39E+26   |
| cg16723994 | 0.02085163 | 10.7865654 | 1.43470956 | 81.0965475 | cg11872076 | 0.04016549 | 20063.8538 | 1.55975794 | 258090195  |
| cg25102206 | 0.02085533 | 12.4471863 | 1.46614038 | 105.673678 | cg00720475 | 0.04016652 | 112.979018 | 1.23626525 | 10324.8542 |
| cg18706879 | 0.02086991 | 403163.091 | 7.08078164 | 2.2955E+10 | cg16557944 | 0.04017171 | 6.26621481 | 1.08577376 | 36.1635634 |
| cg25385322 | 0.02087078 | 0.00374613 | 3.27E-05   | 0.42859139 | cg05945782 | 0.04017937 | 4.7918839  | 1.07272981 | 21.4053447 |
| cg04672495 | 0.0208738  | 9.8279768  | 1.41411064 | 68.3037985 | cg07824564 | 0.04019608 | 2446626.65 | 1.9307723  | 3.1003E+12 |
| cg02375289 | 0.02087411 | 4.60894017 | 1.26071763 | 16.8493951 | cg20972917 | 0.0402074  | 15.0206437 | 1.12866232 | 199.900123 |
| cg01178040 | 0.02087635 | 22.3923148 | 1.6020911  | 312.975812 | cg18229914 | 0.04021013 | 14274.705  | 1.53297487 | 132922728  |
| cg05713859 | 0.0208821  | 110955460  | 16.5733601 | 7.4283E+14 | cg05081953 | 0.04021524 | 55.1278144 | 1.19597931 | 2541.07733 |
| cg09976989 | 0.02088302 | 804580.068 | 7.85373964 | 8.2426E+10 | cg21940081 | 0.04021685 | 0.00289442 | 1.09E-05   | 0.77040637 |
| cg25468277 | 0.02088653 | 15291849.3 | 12.2671526 | 1.9062E+13 | cg05228295 | 0.04022666 | 21469696   | 2.12248659 | 2.1717E+14 |
| cg00500989 | 0.02088694 | 17387.5106 | 4.3909713  | 68851628.6 | cg20516737 | 0.04026577 | 4.0206E+10 | 2.95626428 | 5.47E+20   |
| cg14376467 | 0.02089379 | 9.40919948 | 1.40438692 | 63.0403442 | cg18501409 | 0.04028544 | 894.669304 | 1.35130012 | 592342.996 |
| cg01123729 | 0.0208945  | 70243391.7 | 15.4408684 | 3.1955E+14 | cg00955482 | 0.04028638 | 3835.45934 | 1.44124819 | 10206950.1 |
| cg10671946 | 0.02089734 | 9.23176997 | 1.40026907 | 60.8637143 | cg14399447 | 0.04029561 | 23713493.4 | 2.12000339 | 2.6525E+14 |
| cg00749852 | 0.02089929 | 172.464055 | 2.18154068 | 13634.3322 | cg24028828 | 0.04029829 | 18000.5435 | 1.54254458 | 210055237  |
| cg17408972 | 0.02090708 | 6.20715154 | 1.31840254 | 29.2237986 | cg27347140 | 0.04029859 | 203.03006  | 1.26495317 | 32587.1394 |
| cg05587419 | 0.02090836 | 38.2993086 | 1.73656033 | 844.679573 | cg25594549 | 0.04032457 | 24.7326898 | 1.15201456 | 530.988032 |
| cg09655862 | 0.02091549 | 6.26078941 | 1.3199861  | 29.6953763 | cg11268628 | 0.04033028 | 52.0803795 | 1.19035526 | 2278.61884 |
| cg21987515 | 0.02092187 | 4.84829749 | 1.2697978  | 18.5115997 | cg07962315 | 0.04033101 | 8.12563856 | 1.09674661 | 60.2016924 |
| cg13001868 | 0.02092639 | 2.96838127 | 1.17891216 | 7.474083   | cg15821095 | 0.04033588 | 12.7942759 | 1.11884836 | 146.305345 |
| cg05030680 | 0.02092851 | 7.29458345 | 1.35064175 | 39.3967888 | cg06641593 | 0.04038404 | 0.11334028 | 0.01413225 | 0.90898593 |
| cg11331678 | 0.02092997 | 5.18419356 | 1.28262006 | 20.9538769 | cg27289153 | 0.04039185 | 8.86734651 | 1.1002793  | 71.4635221 |
| cg21461649 | 0.02093157 | 3.62430791 | 1.21500702 | 10.8111374 | cg03415695 | 0.04039281 | 390.851374 | 1.29864262 | 117634.209 |

|            |            |            |            |            |            |            |            |            |            |
|------------|------------|------------|------------|------------|------------|------------|------------|------------|------------|
| cg07252933 | 0.02093449 | 12.2565672 | 1.46078735 | 102.837308 | cg10383568 | 0.04040664 | 10.5669936 | 1.10857598 | 100.725035 |
| cg26493224 | 0.02093584 | 9.01784818 | 1.39452241 | 58.3150081 | cg25924411 | 0.04042599 | 125943.624 | 1.66916666 | 9502823580 |
| cg12508343 | 0.02094051 | 5.79080288 | 1.30410821 | 25.7136622 | cg19815813 | 0.04043023 | 4.5938855  | 1.06874672 | 19.7462913 |
| cg04656330 | 0.02094326 | 5610669332 | 29.7655206 | 1.0576E+18 | cg25748136 | 0.0404429  | 7.02408265 | 1.08859136 | 45.3225508 |
| cg00438309 | 0.02094866 | 0.08094966 | 0.00958145 | 0.68391    | cg08260245 | 0.04045417 | 29.0099143 | 1.15773212 | 726.916971 |
| cg17869426 | 0.02095554 | 1007.87877 | 2.84293616 | 357313.549 | cg02362385 | 0.04045533 | 4781.81379 | 1.44547281 | 15818867.6 |
| cg04971769 | 0.02096832 | 0.06071194 | 0.00562695 | 0.65505097 | cg19280530 | 0.04046689 | 11683.9937 | 1.5019583  | 90891810   |
| cg10998878 | 0.02096849 | 405903.044 | 7.02849358 | 2.3441E+10 | cg15547624 | 0.04050874 | 177793.469 | 1.68639145 | 1.8744E+10 |
| cg14876761 | 0.02097589 | 8.63619994 | 1.38464132 | 53.8651768 | cg04202511 | 0.04051046 | 7.64227498 | 1.09188085 | 53.489689  |
| cg16944926 | 0.02097864 | 11326.675  | 4.09157179 | 31355570.4 | cg14856108 | 0.04053477 | 8591572.2  | 1.99023702 | 3.7089E+13 |
| cg04170535 | 0.02098763 | 5.78778673 | 1.30329131 | 25.7029836 | cg03739476 | 0.04054143 | 33.4794514 | 1.16326772 | 963.556062 |
| cg01313977 | 0.02100031 | 10.1096384 | 1.41743072 | 72.1056678 | cg07294541 | 0.0405633  | 9.80744596 | 1.10308191 | 87.1975105 |
| cg23504474 | 0.0210071  | 7.99265062 | 1.36796236 | 46.6989925 | cg01915791 | 0.04056338 | 5.98596704 | 1.07992509 | 33.1798952 |
| cg03528946 | 0.0210176  | 4406309552 | 28.3860836 | 6.8398E+17 | cg25794884 | 0.04061314 | 437.304797 | 1.29672696 | 147475.522 |
| cg15132013 | 0.02101833 | 6.07084436 | 1.31223322 | 28.085824  | cg23261237 | 0.0406149  | 43261.544  | 1.57788542 | 1186119837 |
| cg13828592 | 0.0210226  | 8124600.9  | 10.9873951 | 6.0077E+12 | cg19896639 | 0.04061642 | 504.794796 | 1.30457747 | 195325.914 |
| cg06451479 | 0.02102297 | 20.9851    | 1.58172106 | 278.414716 | cg17400113 | 0.04062955 | 14.6902411 | 1.12144862 | 192.432521 |
| cg16683920 | 0.02102583 | 17.3430384 | 1.53686517 | 195.710716 | cg03988279 | 0.04063611 | 316518394  | 2.30312097 | 4.3499E+16 |
| cg27621997 | 0.02103873 | 7.61989821 | 1.35757273 | 42.7696045 | cg07264792 | 0.04063994 | 1721359.33 | 1.84366038 | 1.6072E+12 |
| cg15154229 | 0.02104517 | 10.2899504 | 1.42023183 | 74.5533775 | cg13485756 | 0.0406499  | 11995038.5 | 2.00109124 | 7.1901E+13 |
| cg23842796 | 0.02104628 | 4.33274773 | 1.24687405 | 15.0558133 | cg21388527 | 0.04065204 | 27.6989298 | 1.15179011 | 666.120245 |
| cg18488946 | 0.02104772 | 0.1443668  | 0.02788773 | 0.74734553 | cg10248148 | 0.04065285 | 16367.132  | 1.51104812 | 177282912  |
| cg11724135 | 0.02104992 | 4.99797119 | 1.27391465 | 19.608626  | cg10733616 | 0.04066409 | 181414461  | 2.24343097 | 1.467E+16  |
| cg18915287 | 0.0210562  | 16830.3357 | 4.32196802 | 65539633.5 | cg27303326 | 0.04067017 | 1.62E-06   | 4.63E-12   | 0.56774072 |
| cg06630567 | 0.02105805 | 8.66970859 | 1.38382621 | 54.3159586 | cg16002441 | 0.04068524 | 42.9819048 | 1.17282738 | 1575.2055  |
| cg15213225 | 0.02106186 | 75.0837256 | 1.91446003 | 2944.72894 | cg10139651 | 0.04069703 | 7.25225897 | 1.08749358 | 48.3637431 |
| cg10548700 | 0.02106254 | 0.00098532 | 2.75E-06   | 0.35310572 | cg09473613 | 0.04070195 | 5.54994568 | 1.07520378 | 28.6474971 |
| cg17030981 | 0.02106504 | 0.133304   | 0.02405885 | 0.73860376 | cg00414306 | 0.04072264 | 3874.03856 | 1.41729857 | 10589282.3 |
| cg17480760 | 0.02106788 | 3.93804963 | 1.22883975 | 12.6202256 | cg00002719 | 0.04073977 | 3.88618527 | 1.05885513 | 14.2629861 |
| cg05735639 | 0.02108107 | 12.3197215 | 1.45836836 | 104.072154 | cg07687684 | 0.04075359 | 10623423   | 1.97493662 | 5.7145E+13 |

|            |            |            |            |            |            |            |            |            |            |
|------------|------------|------------|------------|------------|------------|------------|------------|------------|------------|
| cg19956166 | 0.02108439 | 995.717935 | 2.82108661 | 351444.086 | cg07397616 | 0.04078479 | 15.9724926 | 1.12315606 | 227.146101 |
| cg00676042 | 0.02108615 | 13979680.2 | 11.8413216 | 1.6504E+13 | cg16685860 | 0.04079578 | 6285461.75 | 1.92575541 | 2.0515E+13 |
| cg25346193 | 0.02108678 | 53.6071599 | 1.81868534 | 1580.11258 | cg09313258 | 0.04079937 | 190.117195 | 1.24557109 | 29018.4545 |
| cg13285862 | 0.02109317 | 134271.707 | 5.88966955 | 3061104044 | cg12351660 | 0.04080091 | 10.3603482 | 1.10276294 | 97.3344412 |
| cg13332774 | 0.02110834 | 32.5060177 | 1.6861905  | 626.644016 | cg06549777 | 0.04080871 | 68520770.1 | 2.12594378 | 2.2085E+15 |
| cg26883434 | 0.0211099  | 22.3730614 | 1.5942077  | 313.982848 | cg25185881 | 0.04082868 | 127.599563 | 1.22413238 | 13300.562  |
| cg19828362 | 0.02111602 | 286.412468 | 2.33671894 | 35105.6776 | cg10260334 | 0.04083253 | 0.09971878 | 0.01094696 | 0.90836511 |
| cg15773138 | 0.02111981 | 68.4287457 | 1.88487675 | 2484.24373 | cg25145905 | 0.04084249 | 25618.887  | 1.52608144 | 430073620  |
| cg18720905 | 0.02112215 | 8.51569217 | 1.37885051 | 52.5923679 | cg22397447 | 0.04085449 | 1.22E-08   | 3.16E-16   | 0.46868325 |
| cg00336946 | 0.02112256 | 5.73751796 | 1.29955211 | 25.3311215 | cg03278924 | 0.04087243 | 372218861  | 2.26818471 | 6.1083E+16 |
| cg08039823 | 0.0211236  | 2.2139E+10 | 35.6039164 | 1.3766E+19 | cg26626663 | 0.04087323 | 6.68700514 | 1.08203932 | 41.3257051 |
| cg02806715 | 0.02112676 | 6.50610107 | 1.32421827 | 31.9655392 | cg25291004 | 0.04087746 | 6.57610211 | 1.08124781 | 39.9955669 |
| cg05146399 | 0.02115122 | 0.11607165 | 0.01860151 | 0.72427589 | cg18709306 | 0.04090264 | 33.3563589 | 1.15608967 | 962.422471 |
| cg14945182 | 0.02115702 | 96.5247967 | 1.98246694 | 4699.71841 | cg00417576 | 0.04091446 | 20.2483334 | 1.13227721 | 362.097728 |
| cg09170903 | 0.0211617  | 138.343378 | 2.0919407  | 9148.86845 | cg04346128 | 0.04091894 | 14.5357685 | 1.11681949 | 189.18775  |
| cg23788592 | 0.02116782 | 2284478.3  | 8.94944551 | 5.8315E+11 | cg10232654 | 0.04092207 | 12.3213989 | 1.10918476 | 136.872482 |
| cg24547885 | 0.02117745 | 3.82389291 | 1.2222321  | 11.9634864 | cg02271139 | 0.04092534 | 11.7544273 | 1.10698849 | 124.813007 |
| cg08642731 | 0.02118177 | 4.75421948 | 1.26265407 | 17.9008673 | cg24315815 | 0.04093062 | 7.23314775 | 1.08498448 | 48.2204375 |
| cg10933774 | 0.02118262 | 19.2734413 | 1.55671847 | 238.620886 | cg19539556 | 0.0409545  | 0.17392048 | 0.03250348 | 0.93061832 |
| cg12135835 | 0.02118723 | 22.0240714 | 1.58794707 | 305.463407 | cg03408033 | 0.04095541 | 5390.77376 | 1.42360109 | 20413332.1 |
| cg02117713 | 0.02118794 | 1927.06942 | 3.09923851 | 1198228.71 | cg11505048 | 0.04095566 | 18.5078287 | 1.12743816 | 303.821296 |
| cg23410129 | 0.02118927 | 0.08159978 | 0.00968556 | 0.68746902 | cg02153299 | 0.04095908 | 25710.5886 | 1.51774647 | 435536752  |
| cg25782440 | 0.02118951 | 52.4690956 | 1.80797758 | 1522.69919 | cg23654545 | 0.04095937 | 2.00E-07   | 7.51E-14   | 0.53056339 |
| cg03660115 | 0.02119416 | 5.83758287 | 1.30184242 | 26.1762662 | cg00564831 | 0.04096792 | 171.160721 | 1.23501049 | 23721.25   |
| cg11350728 | 0.02119488 | 1692.27113 | 3.03856593 | 942478.01  | cg19884658 | 0.04097381 | 4.97521634 | 1.06802481 | 23.1762198 |
| cg21611775 | 0.02119971 | 0.19639173 | 0.04919316 | 0.78404622 | cg13801056 | 0.04099349 | 11.5011926 | 1.10512069 | 119.69501  |
| cg10726226 | 0.02120185 | 82.8852376 | 1.93522642 | 3549.95289 | cg03446876 | 0.04099613 | 2641.96613 | 1.38037059 | 5056602.29 |
| cg05293820 | 0.02121283 | 3.81215921 | 1.22128959 | 11.8993545 | cg05583848 | 0.0410009  | 7.45834366 | 1.08562849 | 51.2393426 |
| cg18357526 | 0.02121531 | 314.146928 | 2.36045272 | 41809.0528 | cg04943729 | 0.0410099  | 7528621.61 | 1.90935334 | 2.9686E+13 |
| cg10531073 | 0.0212163  | 5.59390299 | 1.29324518 | 24.1963017 | cg21440584 | 0.04101448 | 5.62149775 | 1.07303068 | 29.4504504 |

|            |            |            |            |            |
|------------|------------|------------|------------|------------|
| cg26971710 | 0.02122319 | 3003.61528 | 3.30577619 | 2729073.07 |
| cg20703523 | 0.02122332 | 56152.568  | 5.11870996 | 615997180  |
| cg21153962 | 0.02122416 | 821.799633 | 2.72400145 | 247927.415 |
| cg10554624 | 0.02123388 | 14.3589398 | 1.48832354 | 138.531137 |
| cg03067403 | 0.02123539 | 11.7613592 | 1.44461538 | 95.7552932 |
| cg08526991 | 0.02123701 | 4.21522804 | 1.23948139 | 14.3351466 |
| cg20693580 | 0.02123851 | 6.12016756 | 1.31038327 | 28.5843478 |
| cg15977246 | 0.02124018 | 9256709.61 | 10.9505574 | 7.8249E+12 |
| cg21384203 | 0.02124329 | 5.92911256 | 1.30412367 | 26.9563205 |
| cg08224785 | 0.02124337 | 6.20280549 | 1.3129319  | 29.3044872 |
| cg19795338 | 0.02124871 | 9.38875792 | 1.39657517 | 63.1178166 |
| cg15888699 | 0.0212492  | 15499.9722 | 4.21670809 | 56975520.7 |
| cg00402417 | 0.02125141 | 16.0207712 | 1.51236587 | 169.71099  |
| cg15140822 | 0.02125881 | 539868.396 | 7.15466409 | 4.0737E+10 |
| cg02043159 | 0.0212592  | 3.87048932 | 1.22355823 | 12.2435428 |
| cg06459916 | 0.02125957 | 3.0248E+13 | 102.254021 | 8.95E+24   |
| cg00528640 | 0.0212696  | 36013.7955 | 4.77497306 | 271623201  |
| cg21805880 | 0.02126992 | 10.0256093 | 1.40985992 | 71.2927855 |
| cg06893364 | 0.02126992 | 16933.8122 | 4.26705673 | 67201824.4 |
| cg25599242 | 0.02127249 | 13.6946802 | 1.47685851 | 126.988648 |
| cg07914457 | 0.0212733  | 12.9086595 | 1.4638891  | 113.829312 |
| cg21654383 | 0.02127579 | 13.331553  | 1.4708744  | 120.833094 |
| cg06065608 | 0.0212792  | 11.5642471 | 1.43996117 | 92.8718167 |
| cg21573582 | 0.02128126 | 721273092  | 20.8588001 | 2.4941E+16 |
| cg10064585 | 0.02128393 | 25886.5045 | 4.54137951 | 147556731  |
| cg05211836 | 0.02128689 | 5.43614656 | 1.28672013 | 22.96668   |
| cg07390023 | 0.02129197 | 24.3910677 | 1.60883304 | 369.786156 |
| cg27456951 | 0.02130349 | 7.57687547 | 1.35163473 | 42.4737841 |
| cg16966043 | 0.02131137 | 3830.32366 | 3.41164725 | 4300379.93 |
| cg14688451 | 0.02131256 | 45.8919442 | 1.76665143 | 1192.12568 |

|            |            |            |            |            |
|------------|------------|------------|------------|------------|
| cg08052882 | 0.04104227 | 382.030378 | 1.27371331 | 114584.035 |
| cg11457534 | 0.04104368 | 0.11191102 | 0.01369125 | 0.9147506  |
| cg26512283 | 0.04106289 | 140.3009   | 1.2222472  | 16105.0421 |
| cg07400063 | 0.04109408 | 20.2467318 | 1.12937375 | 362.971203 |
| cg09026415 | 0.04109664 | 170482.302 | 1.62757318 | 1.7857E+10 |
| cg10509187 | 0.0410996  | 7.00301806 | 1.08184948 | 45.3318718 |
| cg02618319 | 0.04110211 | 7.84452072 | 1.08679639 | 56.6219267 |
| cg05678729 | 0.04110837 | 11703567.9 | 1.9293494  | 7.0995E+13 |
| cg18605031 | 0.0411223  | 6.57000603 | 1.07884348 | 40.0104188 |
| cg00671759 | 0.04114074 | 8496.42436 | 1.43898201 | 50166872.4 |
| cg11439192 | 0.04115224 | 6361597.92 | 1.87631581 | 2.1569E+13 |
| cg21760146 | 0.041163   | 10.4653706 | 1.0987846  | 99.677391  |
| cg14633527 | 0.04117572 | 9499567.25 | 1.90337856 | 4.7411E+13 |
| cg12649539 | 0.04117783 | 875.931774 | 1.31173213 | 584918.563 |
| cg01636650 | 0.04118395 | 11.7597337 | 1.10366716 | 125.301668 |
| cg14383549 | 0.04120015 | 11.5566321 | 1.10269084 | 121.118033 |
| cg02992632 | 0.04120564 | 6.5014714  | 1.07759068 | 39.2255902 |
| cg25767504 | 0.04121126 | 28.1875757 | 1.14247005 | 695.457551 |
| cg18394090 | 0.04121591 | 2285.94657 | 1.36120628 | 3838912.43 |
| cg25756617 | 0.04122068 | 23.8057499 | 1.13463549 | 499.467655 |
| cg13629565 | 0.04123635 | 881769758  | 2.26871599 | 3.4271E+17 |
| cg01640991 | 0.04123663 | 0.00559056 | 3.84E-05   | 0.81360456 |
| cg01652532 | 0.04128958 | 6834.59125 | 1.41758942 | 32951457.4 |
| cg09372028 | 0.04129225 | 1696.9569  | 1.3415226  | 2146562.95 |
| cg15160780 | 0.04132166 | 1515.53183 | 1.33418298 | 1721530.52 |
| cg01381679 | 0.04133491 | 39334.6782 | 1.51566543 | 1020816918 |
| cg22488745 | 0.04134014 | 7.27070342 | 1.08104558 | 48.8999994 |
| cg24569831 | 0.04137791 | 9.60715159 | 1.09250219 | 84.4825418 |
| cg04283162 | 0.04140435 | 3.00061802 | 1.0437601  | 8.62622411 |
| cg09284397 | 0.04140495 | 296.657775 | 1.24840786 | 70494.4582 |

|            |            |            |            |            |            |            |            |            |            |
|------------|------------|------------|------------|------------|------------|------------|------------|------------|------------|
| cg00670698 | 0.02131405 | 857369.84  | 7.62754621 | 9.6372E+10 | cg01651570 | 0.04142979 | 4.22318179 | 1.05757449 | 16.8643103 |
| cg24580593 | 0.0213145  | 1069360.19 | 7.88201866 | 1.4508E+11 | cg26257177 | 0.04143266 | 1.9983E+19 | 5.61977032 | 7.11E+37   |
| cg26955540 | 0.02132095 | 30.6011412 | 1.66300138 | 563.096252 | cg14039939 | 0.04143295 | 5503.68484 | 1.3973255  | 21677516.7 |
| cg23295623 | 0.02133149 | 0.19054846 | 0.04645223 | 0.78163555 | cg05713474 | 0.04143478 | 1.33E-10   | 4.29E-20   | 0.41351872 |
| cg13065262 | 0.02134789 | 413.786824 | 2.44674111 | 69978.6076 | cg21367838 | 0.04144253 | 7106.8373  | 1.41070341 | 35802803.1 |
| cg00753089 | 0.02135241 | 20.1637641 | 1.56202718 | 260.288291 | cg24287110 | 0.04145187 | 74.8588088 | 1.18204331 | 4740.80872 |
| cg00390941 | 0.02135387 | 0.04737102 | 0.00352905 | 0.63586839 | cg10770023 | 0.04145727 | 10.8147657 | 1.09659268 | 106.656884 |
| cg11987645 | 0.02136095 | 50.0888418 | 1.78757296 | 1403.5187  | cg04411541 | 0.04147729 | 8.72141774 | 1.08727166 | 69.9577946 |
| cg07823452 | 0.02136432 | 4.4749E+13 | 106.085147 | 1.89E+25   | cg02931001 | 0.04148501 | 12.9608752 | 1.10393696 | 152.168369 |
| cg15623892 | 0.02138504 | 90.0880905 | 1.94890068 | 4164.32923 | cg03429645 | 0.04150031 | 7.98546785 | 1.0833302  | 58.8626594 |
| cg03079712 | 0.02138598 | 116.578514 | 2.02476374 | 6712.16584 | cg16127594 | 0.04152082 | 7.65377533 | 1.08134802 | 54.1733798 |
| cg11778001 | 0.0213882  | 44.711853  | 1.75650599 | 1138.14004 | cg07218516 | 0.04152166 | 910568141  | 2.20928633 | 3.753E+17  |
| cg11832722 | 0.0213892  | 4.8910518  | 1.26528604 | 18.9067034 | cg26213155 | 0.04153241 | 0.14467029 | 0.02254123 | 0.92849824 |
| cg27419119 | 0.02139555 | 0.13024694 | 0.02294639 | 0.73929978 | cg01951603 | 0.04153475 | 27211.9342 | 1.47954058 | 500486013  |
| cg00494710 | 0.02140111 | 0.05884034 | 0.00526772 | 0.65724514 | cg00131871 | 0.04154043 | 94.1287645 | 1.19031875 | 7443.57286 |
| cg04788444 | 0.02140187 | 81487.25   | 5.34015122 | 1243442676 | cg02317785 | 0.04156223 | 1293955425 | 2.23034093 | 7.507E+17  |
| cg24801889 | 0.02140342 | 920398.162 | 7.64667686 | 1.1078E+11 | cg16278496 | 0.04158769 | 9.19579245 | 1.08823989 | 77.7058437 |
| cg10889792 | 0.02140585 | 0.14162994 | 0.02679416 | 0.74863469 | cg01067724 | 0.04160668 | 3.4401E+16 | 4.25370163 | 2.78E+32   |
| cg12099952 | 0.02141095 | 3.69499174 | 1.2135436  | 11.2504932 | cg21233517 | 0.04163624 | 75.6987908 | 1.17811128 | 4863.97766 |
| cg20241658 | 0.02141151 | 189690.237 | 6.04759922 | 5949862872 | cg00630431 | 0.04164593 | 5938.42355 | 1.38927181 | 25383711.1 |
| cg12531003 | 0.02141654 | 1487.39508 | 2.94899854 | 750201.833 | cg14611399 | 0.04164837 | 5.75970237 | 1.06847184 | 31.0482412 |
| cg20780850 | 0.02141794 | 41.3547378 | 1.73504269 | 985.690064 | cg15240082 | 0.04167204 | 108.329845 | 1.19327326 | 9834.59165 |
| cg27252587 | 0.02142219 | 41653375.9 | 13.4214722 | 1.2927E+14 | cg15287092 | 0.04167258 | 51.3317805 | 1.16011836 | 2271.27832 |
| cg21287322 | 0.02142424 | 6.25325053 | 1.31166386 | 29.8118622 | cg14591123 | 0.04167331 | 20.7722295 | 1.12119355 | 384.844807 |
| cg25880288 | 0.02142623 | 27847.2924 | 4.54740685 | 170530529  | cg06727703 | 0.04168136 | 37.5897492 | 1.14639453 | 1232.55058 |
| cg13995374 | 0.02142961 | 11117.2322 | 3.96880389 | 31141083.3 | cg13649519 | 0.04169747 | 67.7459009 | 1.1717415  | 3916.82558 |
| cg03547606 | 0.0214297  | 68.1951306 | 1.86778762 | 2489.88471 | cg15205428 | 0.04170471 | 5.165096   | 1.06361333 | 25.0826272 |
| cg16636114 | 0.02142989 | 236.53405  | 2.24514907 | 24919.6624 | cg15109933 | 0.04170974 | 53112276.7 | 1.94976001 | 1.4468E+15 |
| cg05106869 | 0.02144323 | 12.0207824 | 1.44442289 | 100.039407 | cg19081101 | 0.04171076 | 4.74721919 | 1.06020123 | 21.256427  |
| cg07879540 | 0.02144422 | 1332.76913 | 2.89768412 | 612997.649 | cg06746893 | 0.04173063 | 0.19774054 | 0.04154748 | 0.94112381 |

|            |            |            |            |            |            |            |            |            |            |
|------------|------------|------------|------------|------------|------------|------------|------------|------------|------------|
| cg20445950 | 0.02144859 | 244.82424  | 2.25510446 | 26579.2159 | cg13862524 | 0.04173169 | 168109.468 | 1.56896436 | 1.8012E+10 |
| cg18703238 | 0.02144977 | 6.42322372 | 1.31647135 | 31.3396892 | cg15775835 | 0.04174488 | 2.0636E+10 | 2.42925764 | 1.75E+20   |
| cg01599041 | 0.0214509  | 3129951.89 | 9.12426251 | 1.0737E+12 | cg07953400 | 0.04174758 | 3287606.53 | 1.7517136  | 6.1702E+12 |
| cg12529273 | 0.02145303 | 10.7787007 | 1.42109782 | 81.7539696 | cg06191203 | 0.04175677 | 212.361448 | 1.22133884 | 36924.5481 |
| cg19744936 | 0.0214578  | 5.26485199 | 1.27822051 | 21.6853557 | cg07568203 | 0.04179763 | 0.11328965 | 0.01391528 | 0.92233452 |
| cg03892781 | 0.02146956 | 0.16841977 | 0.03690198 | 0.76866395 | cg04039397 | 0.04180251 | 5.23212566 | 1.06331799 | 25.7450163 |
| cg10016610 | 0.02147466 | 10.8106972 | 1.42124191 | 82.2317249 | cg11323985 | 0.04181185 | 10.7508335 | 1.09199697 | 105.843169 |
| cg20928429 | 0.0214771  | 6.03910547 | 1.30410598 | 27.966128  | cg04467350 | 0.0418139  | 2152867740 | 2.21695614 | 2.0906E+18 |
| cg02341811 | 0.02149188 | 316347460  | 17.957805  | 5.5728E+15 | cg06846310 | 0.04182157 | 10.4731442 | 1.09082143 | 100.554267 |
| cg01534125 | 0.02149481 | 5.29254718 | 1.27869649 | 21.9059455 | cg24237813 | 0.04182335 | 246.707285 | 1.226072   | 49641.8515 |
| cg12785251 | 0.0214983  | 0.00030536 | 3.08E-07   | 0.30301197 | cg02456292 | 0.04182668 | 84.8985459 | 1.17853738 | 6115.85445 |
| cg26543539 | 0.02149864 | 15.8048679 | 1.50257553 | 166.24379  | cg14934978 | 0.04183506 | 2627.80321 | 1.33765482 | 5162280.76 |
| cg23796713 | 0.0215002  | 0.03245808 | 0.00174674 | 0.60313852 | cg02929073 | 0.0418442  | 7.42544167 | 1.07679552 | 51.2048787 |
| cg25507001 | 0.02150642 | 18.8103227 | 1.5414316  | 229.545208 | cg00473834 | 0.04185094 | 2.1781E+11 | 2.61855975 | 1.81E+22   |
| cg25436985 | 0.0215081  | 21923.4802 | 4.36585308 | 110090508  | cg05092885 | 0.04185309 | 17931.353  | 1.43482177 | 224092934  |
| cg01554410 | 0.02151286 | 8.55925999 | 1.37233196 | 53.3842638 | cg18011163 | 0.0418558  | 7.91045363 | 1.07919102 | 57.9835038 |
| cg13870539 | 0.02151688 | 7.0920905  | 1.33474485 | 37.6834177 | cg04867634 | 0.04186252 | 146.52258  | 1.20155641 | 17867.5477 |
| cg12821724 | 0.02151702 | 18.1991118 | 1.53363356 | 215.962716 | cg13749822 | 0.04186394 | 6.17314816 | 1.06929997 | 35.6380428 |
| cg20459849 | 0.02151893 | 5.01877828 | 1.26839335 | 19.8582997 | cg27256066 | 0.04186536 | 10.988144  | 1.09222175 | 110.544684 |
| cg01601628 | 0.02152081 | 43.6441758 | 1.74450317 | 1091.89488 | cg24803730 | 0.04187788 | 18.5641155 | 1.11331571 | 309.549556 |
| cg14079785 | 0.02152528 | 11.6373731 | 1.43562571 | 94.3340951 | cg11609545 | 0.04187878 | 3144861.05 | 1.73273305 | 5.7078E+12 |
| cg27179622 | 0.02152628 | 5.20101482 | 1.27497745 | 21.2164969 | cg07616871 | 0.04187932 | 14.1639081 | 1.10228336 | 182.000654 |
| cg18086594 | 0.02153145 | 85433.4726 | 5.32621722 | 1370368111 | cg02140384 | 0.04189309 | 6.64403461 | 1.07191921 | 41.1814581 |
| cg23818978 | 0.02153232 | 0.01860003 | 0.00062218 | 0.55604851 | cg27049761 | 0.04190065 | 4.75141339 | 1.05876088 | 21.3229725 |
| cg19601328 | 0.02153252 | 8.76682686 | 1.3768043  | 55.8229324 | cg04468971 | 0.04191351 | 8286494926 | 2.30566559 | 2.9781E+19 |
| cg18384277 | 0.02153965 | 31.231001  | 1.65985287 | 587.627637 | cg13308525 | 0.04192852 | 113928.782 | 1.52969883 | 8485178389 |
| cg10549973 | 0.02154062 | 77.3270289 | 1.8968563  | 3152.30489 | cg07846311 | 0.04193438 | 5.02996652 | 1.06070146 | 23.8526713 |
| cg00908526 | 0.02154095 | 6.3463286  | 1.31268415 | 30.682085  | cg07266404 | 0.04195076 | 5.48981135 | 1.06395245 | 28.3264806 |
| cg06637001 | 0.02154448 | 4.58642591 | 1.25134659 | 16.8101329 | cg21287322 | 0.04195533 | 6.33312234 | 1.06945916 | 37.5034783 |
| cg20546782 | 0.02155131 | 59.980804  | 1.82670012 | 1969.506   | cg14267284 | 0.04195681 | 9053229416 | 2.30237551 | 3.5598E+19 |

|            |            |            |            |            |            |            |            |            |            |
|------------|------------|------------|------------|------------|------------|------------|------------|------------|------------|
| cg10087172 | 0.02155412 | 6.7136638  | 1.32338795 | 34.0590086 | cg07274204 | 0.041963   | 24.6399959 | 1.12351805 | 540.382415 |
| cg09827065 | 0.02155474 | 2140.19408 | 3.09074447 | 1481982.97 | cg01175550 | 0.04197918 | 5.12606874 | 1.06106894 | 24.764254  |
| cg10985065 | 0.02156318 | 0.1379973  | 0.02548346 | 0.74727888 | cg04614997 | 0.04200149 | 5.85547378 | 1.06600381 | 32.1636499 |
| cg05666423 | 0.02156429 | 63853.811  | 5.09055574 | 800955611  | cg20852788 | 0.04201806 | 19.8974977 | 1.11396043 | 355.407969 |
| cg16881309 | 0.02157101 | 681.18308  | 2.60977496 | 177797.088 | cg21745091 | 0.04202744 | 1821686588 | 2.15662705 | 1.5388E+18 |
| cg24516901 | 0.0215711  | 9.30810476 | 1.38822787 | 62.4110898 | cg20696432 | 0.04202787 | 12.3476057 | 1.0948174  | 139.259173 |
| cg03289681 | 0.02157294 | 37.6913187 | 1.70510325 | 833.166851 | cg03122532 | 0.04203583 | 8.96223945 | 1.08215733 | 74.2237137 |
| cg24524538 | 0.02157516 | 1408843.68 | 8.01608166 | 2.4761E+11 | cg02478520 | 0.04203837 | 7.1926E+13 | 3.15306458 | 1.64E+27   |
| cg16856833 | 0.02158314 | 7.62399633 | 1.34786486 | 43.1239971 | cg02135580 | 0.04204094 | 1851030.41 | 1.68073396 | 2.0386E+12 |
| cg24502126 | 0.02159323 | 31.6172536 | 1.6608546  | 601.88937  | cg15267303 | 0.042049   | 2.99E-08   | 1.67E-15   | 0.53649686 |
| cg01458759 | 0.02159334 | 6004955732 | 27.3154782 | 1.3201E+18 | cg02529547 | 0.04209012 | 41.4259096 | 1.14239303 | 1502.20278 |
| cg17730428 | 0.02159381 | 185.657683 | 2.15404258 | 16001.9007 | cg09819651 | 0.04210988 | 415500645  | 2.0291065  | 8.5082E+16 |
| cg07800524 | 0.02159725 | 23.6859285 | 1.59173221 | 352.460799 | cg05230647 | 0.04211089 | 420.557701 | 1.24034615 | 142596.307 |
| cg06132694 | 0.02160029 | 53.013466  | 1.7915324  | 1568.7283  | cg10732920 | 0.04216041 | 79725.9106 | 1.49145582 | 4261756023 |
| cg15433297 | 0.02160434 | 9.25095726 | 1.38630321 | 61.7326784 | cg10457563 | 0.0421654  | 11.5266538 | 1.09038473 | 121.850337 |
| cg22547764 | 0.02160458 | 0.0001342  | 6.67E-08   | 0.27006743 | cg00500522 | 0.04217658 | 13905.6018 | 1.40098693 | 138021103  |
| cg11258089 | 0.0216117  | 5.15306959 | 1.27207692 | 20.8746231 | cg07974719 | 0.04220162 | 9.79770854 | 1.08371051 | 88.5800146 |
| cg20101015 | 0.02161294 | 5.12350622 | 1.27098638 | 20.653499  | cg13722539 | 0.04221454 | 2654.92466 | 1.31949618 | 5341906.29 |
| cg13580767 | 0.0216266  | 267185.435 | 6.25162602 | 1.1419E+10 | cg06074332 | 0.04222681 | 19191985.9 | 1.80175266 | 2.0443E+14 |
| cg12805580 | 0.0216297  | 9601875185 | 29.106398  | 3.1676E+18 | cg08416638 | 0.04223808 | 0.03297424 | 0.00122545 | 0.88726729 |
| cg03023152 | 0.02163545 | 359.052155 | 2.36939628 | 54409.8304 | cg11856688 | 0.04228454 | 2.0144E+15 | 3.41317083 | 1.19E+30   |
| cg00472687 | 0.02163939 | 1804.83259 | 3.00175958 | 1085170.4  | cg18476690 | 0.04229571 | 16.0066144 | 1.10126487 | 232.652209 |
| cg01356198 | 0.02165356 | 5.73463362 | 1.29158461 | 25.4617641 | cg01317270 | 0.04229584 | 21228.3532 | 1.41419765 | 318656291  |
| cg21075077 | 0.02165452 | 8025657344 | 28.2467095 | 2.2803E+18 | cg07533422 | 0.04229934 | 5.29183997 | 1.05964046 | 26.4274265 |
| cg16823292 | 0.02165963 | 0.20609234 | 0.05352888 | 0.79347921 | cg02191862 | 0.04230066 | 12.3821508 | 1.09140968 | 140.476727 |
| cg19477600 | 0.02166016 | 718804.344 | 7.2070191  | 7.1691E+10 | cg15140822 | 0.04232322 | 256625.022 | 1.5398096  | 4.2769E+10 |
| cg16663033 | 0.0216625  | 5.69831867 | 1.29025256 | 25.1662633 | cg05986680 | 0.04233901 | 7.9193E+12 | 2.79299008 | 2.25E+25   |
| cg04164415 | 0.02166504 | 4.87884436 | 1.26121358 | 18.8731891 | cg01010839 | 0.04234922 | 14.2462924 | 1.09608137 | 185.165858 |
| cg00599564 | 0.02166762 | 6.06833122 | 1.30211655 | 28.280605  | cg18929217 | 0.0423631  | 9.47404908 | 1.08059011 | 83.0635084 |
| cg27160726 | 0.02167058 | 4.54919457 | 1.2482918  | 16.5787929 | cg05526364 | 0.04236985 | 5.58657738 | 1.06103665 | 29.4144852 |



|            |            |            |            |            |            |            |            |            |            |
|------------|------------|------------|------------|------------|------------|------------|------------|------------|------------|
| cg25748136 | 0.02169095 | 7.37566073 | 1.33944184 | 40.6142093 | cg12855522 | 0.04237186 | 5.88501211 | 1.06292222 | 32.5831626 |
| cg20345923 | 0.0216915  | 0.17907012 | 0.04123783 | 0.77758963 | cg16184495 | 0.04237919 | 6.72451565 | 1.06774367 | 42.3501559 |
| cg16107740 | 0.02169388 | 1.2882E+10 | 30.0943801 | 5.5142E+18 | cg20859525 | 0.04238608 | 38044080.2 | 1.82169618 | 7.9451E+14 |
| cg19654882 | 0.02169859 | 38.3451498 | 1.70432967 | 862.714849 | cg08738571 | 0.04238748 | 18.1168352 | 1.10464404 | 297.127135 |
| cg25920207 | 0.02169937 | 19618.8593 | 4.24236407 | 90727630.3 | cg14058329 | 0.0423909  | 11.7024371 | 1.08813897 | 125.85436  |
| cg15787985 | 0.0217022  | 17.4403008 | 1.51879046 | 200.267318 | cg08535411 | 0.04239302 | 29796.9634 | 1.42428702 | 623370864  |
| cg13216025 | 0.02170585 | 3883527.85 | 9.18537667 | 1.6419E+12 | cg20362242 | 0.04239646 | 25.7788963 | 1.11795867 | 594.432974 |
| cg20234170 | 0.02170598 | 161.71717  | 2.10298022 | 12435.8958 | cg22334684 | 0.04241824 | 5.95E-05   | 4.94E-09   | 0.71688117 |
| cg21754746 | 0.02170689 | 55.3486763 | 1.79789735 | 1703.92151 | cg06479512 | 0.04241989 | 149.90694  | 1.18692207 | 18933.0802 |
| cg24948406 | 0.02171354 | 10.007415  | 1.40010112 | 71.5293733 | cg05928186 | 0.04243047 | 20.0263786 | 1.10778591 | 362.033706 |
| cg05205736 | 0.02171554 | 13.952277  | 1.46971106 | 132.451907 | cg07505018 | 0.0424368  | 5.14132599 | 1.05746381 | 24.9968203 |
| cg22043720 | 0.02171998 | 2818.9067  | 3.19120813 | 2490039.72 | cg10726226 | 0.04244044 | 76.5816422 | 1.15948168 | 5058.07726 |
| cg16142824 | 0.02172041 | 0.17712748 | 0.04039923 | 0.77660258 | cg11253514 | 0.04246406 | 8.85953299 | 1.07698525 | 72.8805942 |
| cg09146903 | 0.02172234 | 11.4509096 | 1.42774003 | 91.8397813 | cg21330423 | 0.04247482 | 9.10997841 | 1.0778867  | 76.9948332 |
| cg01836913 | 0.02172933 | 20.7573476 | 1.55711267 | 276.70925  | cg15317837 | 0.0424863  | 8619952.82 | 1.71818655 | 4.3245E+13 |
| cg19507527 | 0.02173267 | 3.74886723 | 1.21278165 | 11.5882406 | cg09674867 | 0.04249017 | 8.21486829 | 1.07394663 | 62.8374435 |
| cg24841124 | 0.02173978 | 165507081  | 15.8296141 | 1.7305E+15 | cg14609668 | 0.04250469 | 26.8266939 | 1.11762656 | 643.928423 |
| cg21926698 | 0.02174059 | 2.9203E+11 | 47.1223344 | 1.81E+21   | cg00758533 | 0.04253946 | 26.3166988 | 1.11630864 | 620.409631 |
| cg15257224 | 0.02174113 | 727.53729  | 2.61601154 | 202334.929 | cg07318155 | 0.0425465  | 149268.277 | 1.49248547 | 1.4929E+10 |
| cg06346307 | 0.02175493 | 56.4977872 | 1.80103692 | 1772.31234 | cg06508879 | 0.04257384 | 15.3944687 | 1.09586926 | 216.257244 |
| cg20162652 | 0.02175689 | 4.34357193 | 1.23884741 | 15.2291694 | cg06798642 | 0.0425937  | 258.954554 | 1.2038789  | 55701.1681 |
| cg24377657 | 0.02176461 | 0.00386613 | 3.36E-05   | 0.44490899 | cg02571738 | 0.04261297 | 11.2698085 | 1.08400465 | 117.166087 |
| cg14329685 | 0.02176727 | 1288.9551  | 2.84026818 | 584946.614 | cg06191536 | 0.04263473 | 6.40042956 | 1.06357147 | 38.5169214 |
| cg09269866 | 0.02177641 | 8.3080551  | 1.36136623 | 50.7018451 | cg18575176 | 0.04264504 | 220603.4   | 1.5036772  | 3.2365E+10 |
| cg07029862 | 0.02178782 | 103.657044 | 1.96576803 | 5465.94641 | cg17794169 | 0.04264993 | 3608.99267 | 1.31176308 | 9929253.47 |
| cg19515317 | 0.02179351 | 204.847256 | 2.17034579 | 19334.4297 | cg19962750 | 0.04267254 | 6.659519   | 1.06461756 | 41.6573941 |
| cg06439982 | 0.02180098 | 2.7173E+10 | 33.0093388 | 2.2369E+19 | cg09069694 | 0.04267401 | 17.5692761 | 1.09925535 | 280.807788 |
| cg01164291 | 0.02180411 | 4348.08292 | 3.38424808 | 5586418.2  | cg12968701 | 0.04267572 | 0.13677063 | 0.01997589 | 0.93643915 |
| cg12406822 | 0.02181059 | 16.012473  | 1.4970209  | 171.273021 | cg06796435 | 0.042681   | 9.17295671 | 1.07584129 | 78.2114757 |
| cg09371439 | 0.02181458 | 12.9785078 | 1.45186474 | 116.017464 | cg16699850 | 0.0426811  | 415944.981 | 1.53228855 | 1.1291E+11 |

|            |            |            |            |            |            |            |            |            |            |
|------------|------------|------------|------------|------------|------------|------------|------------|------------|------------|
| cg05928362 | 0.02181876 | 6.88361853 | 1.32386434 | 35.7923412 | cg23761196 | 0.04268209 | 63214.473  | 1.43989147 | 2775257501 |
| cg14762670 | 0.02182287 | 10.0627264 | 1.39893631 | 72.3824677 | cg27596707 | 0.04269709 | 169.01683  | 1.18391571 | 24128.9887 |
| cg14037218 | 0.02182875 | 24.5508411 | 1.59245435 | 378.499891 | cg11052143 | 0.04271352 | 5.0857187  | 1.05485268 | 24.5195704 |
| cg19445684 | 0.02183615 | 10.3690339 | 1.40476645 | 76.5371804 | cg14960373 | 0.04272424 | 9.24351149 | 1.07563085 | 79.4347842 |
| cg00511731 | 0.02183774 | 1908.10638 | 2.99704787 | 1214818.75 | cg02965178 | 0.04272454 | 12.5820246 | 1.08655538 | 145.696525 |
| cg22935921 | 0.02184244 | 6.45140742 | 1.3110633  | 31.7457271 | cg09677935 | 0.04274162 | 26642951.3 | 1.74917507 | 4.0582E+14 |
| cg22767408 | 0.0218496  | 1163842.55 | 7.60237877 | 1.7817E+11 | cg24818238 | 0.04276714 | 14.0106818 | 1.08982164 | 180.120485 |
| cg11801857 | 0.02185048 | 427.123589 | 2.41001805 | 75698.4208 | cg16679650 | 0.04277165 | 14.8410949 | 1.09180641 | 201.737318 |
| cg04692420 | 0.02185081 | 572.623248 | 2.5148014  | 130386.99  | cg16645133 | 0.04278382 | 7.99856608 | 1.06992401 | 59.795891  |
| cg22401939 | 0.02185323 | 13.1455019 | 1.45362927 | 118.87778  | cg19223541 | 0.04279409 | 18614.5823 | 1.37590952 | 251835364  |
| cg10560368 | 0.02185534 | 1005736.16 | 7.43905292 | 1.3597E+11 | cg08293536 | 0.04279425 | 3702.81851 | 1.30564131 | 10501249.4 |
| cg01754155 | 0.02186628 | 59.1739103 | 1.80790269 | 1936.80317 | cg07604732 | 0.04280043 | 17.8726724 | 1.0980099  | 290.919434 |
| cg09370982 | 0.02187364 | 6.74591708 | 1.31908443 | 34.4992301 | cg01963633 | 0.04280851 | 0.18583443 | 0.03646916 | 0.94694898 |
| cg15476790 | 0.02188364 | 11.788595  | 1.4301196  | 97.1743709 | cg24250450 | 0.04281111 | 7.4318E+12 | 2.61063552 | 2.12E+25   |
| cg13969672 | 0.02188562 | 5804977.66 | 9.56598468 | 3.5227E+12 | cg12235877 | 0.04284041 | 29.8538813 | 1.11572464 | 798.812001 |
| cg09731288 | 0.02188707 | 181.217376 | 2.12525358 | 15452.1502 | cg06289844 | 0.04286508 | 6.19914907 | 1.060365   | 36.241718  |
| cg00759508 | 0.0218924  | 11.1174132 | 1.41782099 | 87.1738225 | cg13202410 | 0.04288344 | 8.99542698 | 1.07292284 | 75.4180109 |
| cg27326372 | 0.02189588 | 70.9095037 | 1.85448607 | 2711.34833 | cg11846968 | 0.04288577 | 0.17768255 | 0.03336753 | 0.94616187 |
| cg04085707 | 0.02189795 | 36075.2717 | 4.57528117 | 284447048  | cg23041619 | 0.04289414 | 83655.4486 | 1.43707749 | 4869768069 |
| cg05323898 | 0.02189856 | 105199.065 | 5.3426368  | 2071419715 | cg09109520 | 0.04290637 | 11.7677232 | 1.08191359 | 127.994796 |
| cg11722699 | 0.02190178 | 5.27181244 | 1.27234964 | 21.8430575 | cg02045285 | 0.04290936 | 111.924576 | 1.16252949 | 10775.7359 |
| cg26123256 | 0.0219175  | 4.61481121 | 1.24785275 | 17.0665029 | cg10277175 | 0.04291044 | 8.84812458 | 1.07206167 | 73.0268702 |
| cg20034372 | 0.02192114 | 5.03905292 | 1.26379632 | 20.0918882 | cg01184539 | 0.04292209 | 35.6509027 | 1.12060335 | 1134.1987  |
| cg14431006 | 0.02192238 | 6.13317637 | 1.30024355 | 28.9298512 | cg16898498 | 0.04293277 | 7.76949543 | 1.06739549 | 56.5536018 |
| cg11971423 | 0.02192802 | 8.25955363 | 1.3573895  | 50.2584013 | cg06476131 | 0.04293709 | 3.73680957 | 1.04279997 | 13.3906273 |
| cg00436603 | 0.02192869 | 0.12960494 | 0.02257684 | 0.7440121  | cg15768282 | 0.0429434  | 31597327.6 | 1.73065074 | 5.7689E+14 |
| cg07548313 | 0.02192941 | 0.23817218 | 0.06981592 | 0.81250783 | cg02506053 | 0.04294884 | 7939973466 | 2.06155534 | 3.058E+19  |
| cg15616400 | 0.0219301  | 6.82960592 | 1.32051948 | 35.322097  | cg14930269 | 0.04295422 | 48800943.9 | 1.7531485  | 1.3584E+15 |
| cg12436713 | 0.02193638 | 12556036.2 | 10.6409848 | 1.4816E+13 | cg06146234 | 0.04296343 | 8.53085614 | 1.07024742 | 67.9987685 |
| cg23725986 | 0.0219413  | 101.567807 | 1.95097194 | 5287.63086 | cg06895295 | 0.04297913 | 19.2910437 | 1.09802659 | 338.921089 |

|            |            |            |            |            |            |            |            |            |            |
|------------|------------|------------|------------|------------|------------|------------|------------|------------|------------|
| cg04016086 | 0.02194501 | 0.01441507 | 0.00038361 | 0.54167787 | cg00094858 | 0.04304233 | 4.76E-07   | 3.57E-13   | 0.63400086 |
| cg26631329 | 0.02194907 | 25725.4736 | 4.34190243 | 152421664  | cg26923779 | 0.04304973 | 2.226E+11  | 2.26370246 | 2.19E+22   |
| cg00031187 | 0.02195184 | 7.22511214 | 1.33095139 | 39.2217522 | cg00786685 | 0.04305003 | 14.7799821 | 1.08785818 | 200.805468 |
| cg19910382 | 0.02196272 | 0.12896519 | 0.02236045 | 0.74381432 | cg20154865 | 0.0430646  | 1051.35467 | 1.24244375 | 889655.283 |
| cg18923051 | 0.02196283 | 17.7541797 | 1.51537913 | 208.007943 | cg16727916 | 0.04306927 | 15699511.4 | 1.67629731 | 1.4704E+14 |
| cg06710694 | 0.02196717 | 9.05E-07   | 6.11E-12   | 0.13394163 | cg20512519 | 0.04307243 | 78160831.5 | 1.76185192 | 3.4674E+15 |
| cg04252889 | 0.02197345 | 0.10949053 | 0.01650043 | 0.72653711 | cg16277607 | 0.04307843 | 11.5665981 | 1.07920282 | 123.967607 |
| cg00419186 | 0.02197445 | 1920.0647  | 2.97979169 | 1237216.84 | cg16332813 | 0.04311094 | 16.7571582 | 1.0912665  | 257.317853 |
| cg27596707 | 0.02197637 | 198.908637 | 2.14758171 | 18422.8827 | cg06849960 | 0.04311413 | 7.19258329 | 1.06300951 | 48.6667842 |
| cg07071389 | 0.02197658 | 4.55220829 | 1.24466733 | 16.6491076 | cg23107161 | 0.04313894 | 32.2905755 | 1.11316948 | 936.677917 |
| cg23048494 | 0.02197891 | 10.3781701 | 1.40191543 | 76.8280391 | cg13455960 | 0.04314593 | 12.5359803 | 1.08105335 | 145.368221 |
| cg22650315 | 0.02198262 | 10.81385   | 1.41018424 | 82.924875  | cg07540542 | 0.04314827 | 1552.55278 | 1.25406153 | 1922090.81 |
| cg03231960 | 0.02198545 | 162025.86  | 5.64954106 | 4646816283 | cg22923514 | 0.04315781 | 25.3374748 | 1.10455913 | 581.216169 |
| cg14657834 | 0.0219881  | 5.06870207 | 1.26398269 | 20.3260225 | cg04189328 | 0.04315903 | 39.9582188 | 1.12012589 | 1425.42839 |
| cg26928531 | 0.02199363 | 36.0392248 | 1.67741781 | 774.300664 | cg11354594 | 0.04319445 | 5.47608747 | 1.05340327 | 28.4672878 |
| cg07702750 | 0.02200019 | 5.80408442 | 1.2887651  | 26.1392832 | cg24547885 | 0.04319948 | 3.8179472  | 1.04180973 | 13.9917304 |
| cg05799507 | 0.02200089 | 6.37732516 | 1.30638421 | 31.1319409 | cg17636471 | 0.04321795 | 2.24E-15   | 1.40E-29   | 0.35757663 |
| cg10537847 | 0.02200209 | 2702537.27 | 8.46735793 | 8.6257E+11 | cg03478249 | 0.04322295 | 9.34094243 | 1.07044    | 81.511533  |
| cg06375085 | 0.02200717 | 8.3217E+10 | 37.5683691 | 1.84E+20   | cg13752005 | 0.04322923 | 3602.3624  | 1.28305559 | 10114148.6 |
| cg15044767 | 0.02201084 | 0.11055395 | 0.01679012 | 0.72793868 | cg12938320 | 0.04323131 | 5.95457139 | 1.05578443 | 33.5834851 |
| cg11572305 | 0.02201222 | 488.30282  | 2.44147889 | 97661.9725 | cg14807549 | 0.04324333 | 1462390103 | 1.89819654 | 1.1266E+18 |
| cg21035374 | 0.0220124  | 8.81215884 | 1.3685482  | 56.7419865 | cg23302730 | 0.04324776 | 4.75110755 | 1.0484319  | 21.5302709 |
| cg12804865 | 0.02201715 | 124267.403 | 5.42423159 | 2846926279 | cg01381613 | 0.04324821 | 0.01247702 | 0.00017783 | 0.87543183 |
| cg10614773 | 0.02201871 | 5851.99812 | 3.49147696 | 9808422.75 | cg19973659 | 0.04326877 | 163152.191 | 1.43777385 | 1.8514E+10 |
| cg25154306 | 0.02202928 | 36328.6607 | 4.53932552 | 290741782  | cg10370375 | 0.0432706  | 0.05237809 | 0.00299941 | 0.91466641 |
| cg09840386 | 0.02203097 | 25.3002048 | 1.59269157 | 401.898504 | cg07513446 | 0.04327493 | 9.82561438 | 1.07150055 | 90.1004653 |
| cg25925006 | 0.0220447  | 4.69776014 | 1.24948771 | 17.6623989 | cg17200441 | 0.04328861 | 13.5987056 | 1.0818976  | 170.926336 |
| cg08618068 | 0.02205353 | 750.7304   | 2.59309991 | 217344.55  | cg10054857 | 0.04331054 | 0.2070886  | 0.04496427 | 0.95377259 |
| cg04270652 | 0.02205938 | 7.67763098 | 1.34079476 | 43.9634902 | cg05927159 | 0.04332062 | 450770.399 | 1.47803271 | 1.3748E+11 |
| cg02349739 | 0.0220662  | 830.328636 | 2.62953828 | 262192.663 | cg00398048 | 0.043341   | 13.7501281 | 1.08157056 | 174.806925 |

|            |            |            |            |            |            |            |            |            |            |
|------------|------------|------------|------------|------------|------------|------------|------------|------------|------------|
| cg12995933 | 0.02207496 | 1392610.1  | 7.64413992 | 2.5371E+11 | cg17368254 | 0.04334507 | 8.13085699 | 1.06466135 | 62.0956471 |
| cg19169234 | 0.02207933 | 44502.7693 | 4.65790525 | 425190374  | cg18236745 | 0.04335029 | 88512.2298 | 1.40535894 | 5574671780 |
| cg02918577 | 0.02208088 | 4.91958045 | 1.25734801 | 19.2486658 | cg00337957 | 0.04336137 | 20376.4091 | 1.34434329 | 308848232  |
| cg00869941 | 0.02208098 | 21.7065742 | 1.55638291 | 302.73743  | cg23242944 | 0.04337529 | 41.4311484 | 1.1171948  | 1536.47337 |
| cg10758227 | 0.02208252 | 13.321245  | 1.45086357 | 122.310307 | cg04911307 | 0.04337656 | 5847.59083 | 1.29442447 | 26416619.2 |
| cg22409775 | 0.0220843  | 603720507  | 18.2782904 | 1.9941E+16 | cg12819417 | 0.04338014 | 37.4717789 | 1.11376973 | 1260.70424 |
| cg27280575 | 0.02209849 | 5.84335211 | 1.28857776 | 26.4980237 | cg27571057 | 0.04338096 | 0.01165335 | 0.00015502 | 0.87601528 |
| cg26201826 | 0.02210124 | 2622682.14 | 8.3515852  | 8.2361E+11 | cg08627125 | 0.04338499 | 7.48836435 | 1.06164906 | 52.819338  |
| cg13661211 | 0.02210948 | 1178980.1  | 7.44014222 | 1.8682E+11 | cg04003582 | 0.04339477 | 6.45522186 | 1.05688694 | 39.4270075 |
| cg20874811 | 0.02211742 | 34484.6384 | 4.47875005 | 265518342  | cg10759590 | 0.04343297 | 54.4863928 | 1.1251368  | 2638.58316 |
| cg02135580 | 0.02211776 | 2763836.17 | 8.40143407 | 9.0922E+11 | cg10575841 | 0.04344599 | 74865238.1 | 1.70509164 | 3.2871E+15 |
| cg01915791 | 0.02212581 | 5.73491361 | 1.28472134 | 25.6002862 | cg11993436 | 0.0434631  | 2276.34969 | 1.25470324 | 4129875.29 |
| cg15597770 | 0.02213002 | 294758.404 | 6.08743262 | 1.4272E+10 | cg26495758 | 0.04346536 | 222038.731 | 1.43506462 | 3.4355E+10 |
| cg10824705 | 0.02213199 | 6.02800983 | 1.2938477  | 28.0843739 | cg13447915 | 0.04346552 | 645.170535 | 1.20903136 | 344279.753 |
| cg26827725 | 0.02213285 | 9.66342542 | 1.38442729 | 67.4515674 | cg21115558 | 0.04347012 | 0.23166811 | 0.05602143 | 0.95802824 |
| cg23130075 | 0.02214226 | 37.5008175 | 1.68122575 | 836.47976  | cg04206724 | 0.04349307 | 2496.47236 | 1.25674349 | 4959145.85 |
| cg23694882 | 0.02214824 | 47.8500512 | 1.74073651 | 1315.32107 | cg09713758 | 0.043494   | 0.11117616 | 0.01317918 | 0.93785368 |
| cg00417297 | 0.02215007 | 49899.5091 | 4.71192514 | 528438151  | cg04667246 | 0.04350538 | 5021088754 | 1.91795562 | 1.3145E+19 |
| cg08516222 | 0.02215196 | 20.4314864 | 1.54077494 | 270.932258 | cg00982136 | 0.04351365 | 4.27968744 | 1.04324293 | 17.5565288 |
| cg22546130 | 0.02216244 | 32.3325549 | 1.64512488 | 635.449696 | cg09505788 | 0.04354244 | 6.23427259 | 1.05447608 | 36.8582611 |
| cg23253991 | 0.02216493 | 95.5396029 | 1.92112152 | 4751.29534 | cg16158863 | 0.04355025 | 8.27752313 | 1.06309491 | 64.4508675 |
| cg18785300 | 0.02216555 | 10376.5436 | 3.75895943 | 28644272.4 | cg15080939 | 0.04355405 | 30.519554  | 1.10395295 | 843.734485 |
| cg07684809 | 0.02216933 | 3.66986855 | 1.2045917  | 11.1804981 | cg23341126 | 0.04356825 | 2928254.66 | 1.53695858 | 5.579E+12  |
| cg26797270 | 0.02217418 | 3.03E-05   | 4.07E-09   | 0.22554625 | cg10245865 | 0.04358421 | 2236136.26 | 1.52339764 | 3.2823E+12 |
| cg06002947 | 0.02217658 | 984488.379 | 7.20703755 | 1.3448E+11 | cg18599117 | 0.04358664 | 9213702.9  | 1.58650036 | 5.3509E+13 |
| cg02311932 | 0.02217913 | 8.57733093 | 1.3600892  | 54.0924861 | cg18675600 | 0.04359149 | 0.10710326 | 0.01223225 | 0.93777569 |
| cg07728579 | 0.02218657 | 7.65366626 | 1.33796242 | 43.7819525 | cg18840832 | 0.04360771 | 308.473152 | 1.17868729 | 80730.2205 |
| cg25014411 | 0.02218936 | 34.1005335 | 1.6567046  | 701.903271 | cg15387598 | 0.04360785 | 546.331446 | 1.19816659 | 249112.312 |
| cg01596834 | 0.02219609 | 4.91726357 | 1.25578061 | 19.2545424 | cg08886727 | 0.0436359  | 5.7602993  | 1.05126677 | 31.5629192 |
| cg04513669 | 0.02219849 | 189.656386 | 2.11692453 | 16991.4157 | cg13105327 | 0.04366056 | 12.2715326 | 1.07390836 | 140.226594 |

|            |            |            |            |            |            |            |            |            |            |
|------------|------------|------------|------------|------------|------------|------------|------------|------------|------------|
| cg18133072 | 0.02220267 | 36.380819  | 1.6716014  | 791.794017 | cg05445326 | 0.04367329 | 0.20116119 | 0.04235006 | 0.95550814 |
| cg10002561 | 0.0222058  | 1.1643E+11 | 38.1695301 | 3.55E+20   | cg24330818 | 0.04367808 | 55.4778811 | 1.12062415 | 2746.50096 |
| cg16525330 | 0.02221264 | 44.9485591 | 1.72248852 | 1172.93842 | cg05502525 | 0.043679   | 506596739  | 1.76526969 | 1.4538E+17 |
| cg17513770 | 0.02221468 | 0.09578426 | 0.01282737 | 0.71523799 | cg23771949 | 0.04368112 | 0.11336774 | 0.01367032 | 0.94015693 |
| cg06457011 | 0.02221593 | 5.36209862 | 1.27115687 | 22.6188461 | cg13879483 | 0.04368362 | 3.81398657 | 1.03865652 | 14.0051049 |
| cg18142162 | 0.02222171 | 13.3384661 | 1.44777387 | 122.888443 | cg08402850 | 0.04369354 | 17.1624844 | 1.08373297 | 271.792848 |
| cg03058232 | 0.02222516 | 7.84204921 | 1.34194    | 45.8274853 | cg18604823 | 0.04369875 | 8.42204057 | 1.062074   | 66.7851462 |
| cg26505822 | 0.02223062 | 4448257411 | 23.8514892 | 8.2959E+17 | cg15141467 | 0.04369886 | 7.2401066  | 1.05754362 | 49.5668856 |
| cg21879102 | 0.02223136 | 4.54215667 | 1.24118686 | 16.6221444 | cg19977011 | 0.04370567 | 2334825.08 | 1.51279718 | 3.6035E+12 |
| cg00656881 | 0.0222384  | 15.4706702 | 1.47833293 | 161.899685 | cg01366985 | 0.04371907 | 5.69003766 | 1.050197   | 30.8290051 |
| cg21401879 | 0.02224139 | 3.64721212 | 1.20280406 | 11.0592878 | cg01292626 | 0.04373664 | 151.296145 | 1.15140099 | 19880.5835 |
| cg06905367 | 0.02224883 | 0.0812646  | 0.00944743 | 0.69901906 | cg12415590 | 0.04374701 | 4882.32137 | 1.26890461 | 18785542.9 |
| cg19290577 | 0.02225065 | 18.0399684 | 1.51076553 | 215.414274 | cg08081524 | 0.04375107 | 93.5013846 | 1.13559846 | 7698.59176 |
| cg05901193 | 0.02226076 | 51.842473  | 1.75582822 | 1530.69758 | cg04204002 | 0.04381523 | 858047.75  | 1.46052291 | 5.041E+11  |
| cg11739758 | 0.02227906 | 5.0231748  | 1.25853173 | 20.048986  | cg21647780 | 0.04382931 | 175104.951 | 1.39646979 | 2.1957E+10 |
| cg19564884 | 0.02228469 | 3144.15839 | 3.14877881 | 3139544.75 | cg19516235 | 0.04383366 | 115.006158 | 1.14014219 | 11600.6727 |
| cg00576402 | 0.02228575 | 2.1544E+19 | 566.857894 | 8.19E+35   | cg23162960 | 0.04386472 | 89941150.9 | 1.65466939 | 4.8888E+15 |
| cg02939508 | 0.02228871 | 4964570759 | 24.02781   | 1.0258E+18 | cg01535980 | 0.04387604 | 11.2296561 | 1.06862979 | 118.006419 |
| cg20276962 | 0.02229392 | 14.2022086 | 1.45901424 | 138.245894 | cg03443162 | 0.04390384 | 961.795263 | 1.20639238 | 766790.425 |
| cg11629443 | 0.02230233 | 5536772.21 | 9.11309928 | 3.3639E+12 | cg17169566 | 0.04392357 | 5624584.02 | 1.5267855  | 2.0721E+13 |
| cg01492656 | 0.02230327 | 29.2647974 | 1.6168659  | 529.684228 | cg02125271 | 0.04393299 | 13.7620396 | 1.07387167 | 176.365332 |
| cg05868023 | 0.02230562 | 25.6272687 | 1.58653524 | 413.956706 | cg14400118 | 0.04393576 | 8.71563185 | 1.06059065 | 71.62258   |
| cg02627110 | 0.02230564 | 5272924289 | 24.1761398 | 1.15E+18   | cg13394083 | 0.0439435  | 123664898  | 1.65796999 | 9.2239E+15 |
| cg04380955 | 0.02230582 | 7.216195   | 1.32474074 | 39.3084238 | cg19838156 | 0.04394969 | 65.0745232 | 1.11983437 | 3781.53561 |
| cg07903860 | 0.02230716 | 12887932.4 | 10.2722465 | 1.617E+13  | cg16093048 | 0.0439592  | 81.4571806 | 1.1264538  | 5890.40784 |
| cg19867816 | 0.02231593 | 15554.8766 | 3.9463918  | 61310229.1 | cg25461508 | 0.0439629  | 6.66000663 | 1.05261791 | 42.1384511 |
| cg00736406 | 0.02233472 | 9.9543434  | 1.38619777 | 71.4825506 | cg04948483 | 0.04396504 | 883.072566 | 1.20128221 | 649154.003 |
| cg00014118 | 0.0223463  | 8.86008524 | 1.36322619 | 57.584802  | cg16525330 | 0.04396565 | 54.6693008 | 1.11423048 | 2682.32874 |
| cg24838316 | 0.02235106 | 4.00412033 | 1.21774919 | 13.166077  | cg07921092 | 0.04397101 | 3745.61299 | 1.24885508 | 11233982.9 |
| cg06897702 | 0.02235158 | 0.0093966  | 0.00017131 | 0.51542137 | cg10508349 | 0.04397373 | 6.33012529 | 1.05107599 | 38.1233008 |

|            |            |            |            |            |            |            |            |            |            |
|------------|------------|------------|------------|------------|------------|------------|------------|------------|------------|
| cg10999157 | 0.02235571 | 691.72799  | 2.53043413 | 189093.091 | cg15720535 | 0.04397388 | 8.83773265 | 1.06058583 | 73.6437508 |
| cg10056854 | 0.02235592 | 22561.446  | 4.15007759 | 122652851  | cg13694725 | 0.04397601 | 100.137293 | 1.13236145 | 8855.36803 |
| cg10062803 | 0.02235796 | 9.94681683 | 1.38557533 | 71.4065579 | cg25860425 | 0.04399445 | 969203424  | 1.74474186 | 5.3839E+17 |
| cg18725076 | 0.02235807 | 9.13306901 | 1.36888656 | 60.9348882 | cg24874612 | 0.04399904 | 5.29884355 | 1.04583917 | 26.8470944 |
| cg02189843 | 0.02235912 | 11.550552  | 1.41526588 | 94.2686826 | cg25065723 | 0.04401353 | 0.12507692 | 0.01654096 | 0.9457878  |
| cg22960067 | 0.02236705 | 415331454  | 16.7092515 | 1.0324E+16 | cg05876083 | 0.04404367 | 2.57E-10   | 1.19E-19   | 0.55490277 |
| cg09619624 | 0.02237481 | 3.53828875 | 1.19631893 | 10.4650081 | cg26592281 | 0.04404423 | 10974.0413 | 1.28161866 | 93966783.3 |
| cg09820519 | 0.0223781  | 13.2597648 | 1.44281089 | 121.860295 | cg16400971 | 0.04405164 | 75411.1604 | 1.34870687 | 4216515278 |
| cg24371075 | 0.02238629 | 21.6137572 | 1.54609143 | 302.151924 | cg00201025 | 0.04405916 | 13.8870346 | 1.07249566 | 179.813995 |
| cg10638827 | 0.02238877 | 14.9439319 | 1.46721746 | 152.207227 | cg07574241 | 0.04407123 | 1079.42449 | 1.20370512 | 967975.634 |
| cg01926269 | 0.02239258 | 9.459959   | 1.37505542 | 65.0816125 | cg25332377 | 0.04407271 | 13.7143042 | 1.07196357 | 175.45572  |
| cg27640078 | 0.02239686 | 60.8291748 | 1.78989274 | 2067.2683  | cg21016004 | 0.04408283 | 39.4007881 | 1.1022235  | 1408.44584 |
| cg00375581 | 0.02240209 | 6.9319141  | 1.31561696 | 36.523878  | cg09339907 | 0.0441369  | 10912.7321 | 1.27635959 | 93302642.7 |
| cg19598293 | 0.02241334 | 9.30514616 | 1.37143764 | 63.1350214 | cg12968732 | 0.04413978 | 0.2222304  | 0.05137372 | 0.9613154  |
| cg26387796 | 0.02241436 | 6.33890345 | 1.29886491 | 30.9360092 | cg06374165 | 0.044145   | 4.17378007 | 1.03815527 | 16.7801875 |
| cg08645907 | 0.02242204 | 6.68535954 | 1.30856706 | 34.1549423 | cg24791601 | 0.04415195 | 1783480441 | 1.74644092 | 1.8213E+18 |
| cg05365729 | 0.02243771 | 44.9851516 | 1.71326968 | 1181.17065 | cg02322879 | 0.04415975 | 0.18098101 | 0.03425082 | 0.95630186 |
| cg16967099 | 0.02243821 | 8.90676031 | 1.36249304 | 58.224429  | cg25308662 | 0.04416341 | 0.0405293  | 0.0017861  | 0.91966864 |
| cg14015706 | 0.02244147 | 3.31058112 | 1.18447985 | 9.25296225 | cg20939662 | 0.04417124 | 6.99353212 | 1.05204722 | 46.4898253 |
| cg07627556 | 0.02244252 | 6.58886208 | 1.30555477 | 33.2526099 | cg14653977 | 0.04420122 | 29.4578842 | 1.09175206 | 794.838841 |
| cg25509822 | 0.02244579 | 408063386  | 16.5020767 | 1.0091E+16 | cg14277108 | 0.04420235 | 619.070332 | 1.18148397 | 324378.565 |
| cg19410789 | 0.02244654 | 612672.807 | 6.58073009 | 5.704E+10  | cg14230666 | 0.04421695 | 4.05055528 | 1.03686061 | 15.8237259 |
| cg25984973 | 0.02244914 | 95.4864945 | 1.90509732 | 4785.93432 | cg04897244 | 0.0442187  | 15281.2254 | 1.28303355 | 182002916  |
| cg23271269 | 0.02245486 | 1069.22318 | 2.67996084 | 426587.655 | cg20351640 | 0.04422173 | 125.531018 | 1.13308473 | 13907.2005 |
| cg04874562 | 0.0224578  | 0.08631435 | 0.01053223 | 0.70736885 | cg13621317 | 0.04422375 | 5.87215477 | 1.04681472 | 32.9401191 |
| cg13959152 | 0.02246562 | 1.8559E+10 | 28.2262893 | 1.2203E+19 | cg09125316 | 0.04423153 | 0.15251204 | 0.02441669 | 0.9526238  |
| cg07956775 | 0.02246719 | 29.3607769 | 1.61190242 | 534.806083 | cg16701456 | 0.04424234 | 5.46176857 | 1.04470498 | 28.5543924 |
| cg03635685 | 0.02246786 | 23.5063124 | 1.5620304  | 353.736216 | cg18949300 | 0.04424724 | 6.04625687 | 1.04740216 | 34.9027562 |
| cg11942971 | 0.02247001 | 10109.9558 | 3.67827517 | 27787808.8 | cg00869941 | 0.04424852 | 19.1106049 | 1.07887017 | 338.516378 |
| cg02325250 | 0.02247216 | 8.12926348 | 1.34439277 | 49.1559657 | cg01741932 | 0.04427751 | 87780968.8 | 1.5971244  | 4.8246E+15 |

|            |            |            |            |            |            |            |            |            |            |
|------------|------------|------------|------------|------------|------------|------------|------------|------------|------------|
| cg24773720 | 0.02248587 | 4.92822018 | 1.25247136 | 19.3915446 | cg02186542 | 0.04430206 | 8.69667071 | 1.05667191 | 71.5757473 |
| cg05873146 | 0.02248596 | 12.3387693 | 1.425686   | 106.787349 | cg04981056 | 0.04430991 | 8.71096078 | 1.05663375 | 71.8137552 |
| cg02900441 | 0.02249132 | 10.6652991 | 1.39654405 | 81.4500661 | cg09020665 | 0.04431595 | 28.7498506 | 1.08913446 | 758.908969 |
| cg07566050 | 0.022504   | 817.0868   | 2.57458609 | 259315.795 | cg15991262 | 0.04433385 | 14.4922071 | 1.07009681 | 196.266419 |
| cg13042536 | 0.02250954 | 222143054  | 15.0246017 | 3.2844E+15 | cg23737062 | 0.04435481 | 10.9111437 | 1.06218396 | 112.083274 |
| cg03314977 | 0.02251116 | 7.08575626 | 1.31791777 | 38.0964146 | cg26912671 | 0.04437634 | 17.6702666 | 1.07488481 | 290.48538  |
| cg26841114 | 0.02251268 | 25.7900636 | 1.58115466 | 420.659278 | cg03609847 | 0.04437779 | 2.536E+14  | 2.30195449 | 2.79E+28   |
| cg07254054 | 0.02251656 | 9.52215292 | 1.37388192 | 65.9964986 | cg12798700 | 0.04438844 | 2037.63263 | 1.21066598 | 3429473.35 |
| cg23107161 | 0.02252907 | 35.8691788 | 1.6558037  | 777.02326  | cg11915525 | 0.04439144 | 16.3343631 | 1.07255477 | 248.762511 |
| cg14037393 | 0.02253293 | 1382.79461 | 2.76918332 | 690499.951 | cg10094907 | 0.04439466 | 799.69622  | 1.18236126 | 540878.72  |
| cg10660256 | 0.02253485 | 9.63374048 | 1.37577669 | 67.459317  | cg09250087 | 0.04440791 | 6.72887572 | 1.0488147  | 43.1704175 |
| cg06785999 | 0.02253563 | 4.04243544 | 1.2173925  | 13.4231847 | cg10936964 | 0.04441478 | 19.9273545 | 1.07757043 | 368.51369  |
| cg07065111 | 0.0225374  | 4.83764622 | 1.24855017 | 18.7439973 | cg24041078 | 0.04444919 | 5.08242378 | 1.04116213 | 24.809807  |
| cg10397527 | 0.02253907 | 4.2186095  | 1.22468909 | 14.5315789 | cg00076353 | 0.0444512  | 61245.6729 | 1.3144022  | 2853793488 |
| cg01254948 | 0.02254084 | 8.76260802 | 1.35742306 | 56.5654892 | cg19896655 | 0.04445765 | 443847987  | 1.63761445 | 1.203E+17  |
| cg17330672 | 0.022543   | 4.45160645 | 1.23394847 | 16.0596658 | cg21338852 | 0.04446474 | 50.4430094 | 1.10186128 | 2309.27182 |
| cg04745805 | 0.02254362 | 6.02243114 | 1.28757283 | 28.1690294 | cg14161426 | 0.04447353 | 3.7369E+10 | 1.82446541 | 7.65E+20   |
| cg00976340 | 0.02254373 | 70.7061454 | 1.82118747 | 2745.10949 | cg03072286 | 0.04447881 | 14.8280912 | 1.06880107 | 205.718628 |
| cg16926389 | 0.02254511 | 3742702.02 | 8.41924615 | 1.6638E+12 | cg26455413 | 0.04448654 | 18852.6261 | 1.27451457 | 278868144  |
| cg17407629 | 0.02255983 | 27.7928303 | 1.59631866 | 483.889237 | cg04822330 | 0.04449201 | 5.12795851 | 1.0410586  | 25.258865  |
| cg04911307 | 0.02256407 | 6645.96462 | 3.44842124 | 12808425.3 | cg12406391 | 0.04449276 | 3.78217725 | 1.03328239 | 13.8441001 |
| cg02378501 | 0.02256415 | 95029.6335 | 5.01307413 | 1801415859 | cg27345592 | 0.04449894 | 33515.1334 | 1.29194592 | 869435897  |
| cg19321739 | 0.02257413 | 1.3325E+11 | 36.6357779 | 4.85E+20   | cg02884024 | 0.04450167 | 10768.3901 | 1.25623939 | 92305834.7 |
| cg00735923 | 0.02257621 | 3.34390458 | 1.18493005 | 9.43658899 | cg06969125 | 0.04450843 | 6517891.77 | 1.46965629 | 2.8907E+13 |
| cg16269716 | 0.02257682 | 31.9326848 | 1.62719581 | 626.65867  | cg08511084 | 0.04452318 | 122254309  | 1.57729211 | 9.4758E+15 |
| cg15642759 | 0.02258012 | 6.25402475 | 1.29387954 | 30.229109  | cg16509355 | 0.04459076 | 9.70346963 | 1.05644475 | 89.1265948 |
| cg04396550 | 0.0225839  | 226.899849 | 2.14307302 | 24023.2324 | cg03094905 | 0.04459363 | 2118.65245 | 1.20315828 | 3730754.51 |
| cg02838877 | 0.02259988 | 9.56856076 | 1.37317804 | 66.6755166 | cg19751990 | 0.04459844 | 0.18825614 | 0.03689749 | 0.96050913 |
| cg20466166 | 0.02260156 | 14.0729351 | 1.44957169 | 136.624841 | cg01208515 | 0.04462077 | 84.6906486 | 1.11254321 | 6446.94594 |
| cg04123157 | 0.02260369 | 2670.70543 | 3.02740895 | 2356030.4  | cg05724197 | 0.04462326 | 6.81460207 | 1.04716277 | 44.3472616 |

|            |            |            |            |            |            |            |            |            |            |
|------------|------------|------------|------------|------------|------------|------------|------------|------------|------------|
| cg11649846 | 0.02260466 | 18567.5027 | 3.97441262 | 86742919.9 | cg15416643 | 0.04462859 | 6.4319572  | 1.04566319 | 39.5634786 |
| cg25800170 | 0.02261425 | 14.5185636 | 1.45561631 | 144.810611 | cg24805759 | 0.04463292 | 11.7717399 | 1.06088374 | 130.621156 |
| cg01136750 | 0.02261703 | 8207506.94 | 9.33500192 | 7.2162E+12 | cg17601287 | 0.04463685 | 15.425272  | 1.06772721 | 222.846263 |
| cg18755581 | 0.02261737 | 10190.1287 | 3.65063325 | 28444030.6 | cg24371075 | 0.04465012 | 65.0834047 | 1.10490717 | 3833.67008 |
| cg15847400 | 0.02261752 | 539.781952 | 2.41736199 | 120529.965 | cg13762471 | 0.04469394 | 27129.5722 | 1.27359467 | 577902609  |
| cg03234661 | 0.02262714 | 661.876449 | 2.48653391 | 176181.162 | cg04059461 | 0.04469874 | 16.2951543 | 1.06828688 | 248.558753 |
| cg10382221 | 0.02263796 | 6.59958832 | 1.30279235 | 33.4317024 | cg06799455 | 0.0447128  | 3389.54661 | 1.21151018 | 9483227.15 |
| cg23684246 | 0.02264167 | 13.6035184 | 1.4417238  | 128.357258 | cg22251932 | 0.04473478 | 1761.02692 | 1.19203358 | 2601617.82 |
| cg24810594 | 0.022659   | 1.8572E+10 | 27.4193816 | 1.2579E+19 | cg03830181 | 0.04474526 | 9.70832506 | 1.05476218 | 89.3581294 |
| cg06890747 | 0.02265967 | 7.06788481 | 1.31501727 | 37.988091  | cg12828075 | 0.04476505 | 5.18617784 | 1.03920898 | 25.8816476 |
| cg01102833 | 0.02266196 | 20.4943423 | 1.52636184 | 275.175948 | cg20141824 | 0.04477019 | 66761.952  | 1.29603012 | 3439085362 |
| cg10160068 | 0.02266642 | 4.7039E+10 | 31.1943385 | 7.0932E+19 | cg14579118 | 0.04477269 | 10.0610105 | 1.05534004 | 95.9159402 |
| cg14633527 | 0.02267704 | 32717725.6 | 11.2593853 | 9.5072E+13 | cg00381622 | 0.04477898 | 44.0084809 | 1.0921889  | 1773.27053 |
| cg01718071 | 0.02268275 | 119532.704 | 5.13203133 | 2784095896 | cg07489950 | 0.04478133 | 10935.7217 | 1.24185223 | 96299710.2 |
| cg03290610 | 0.02268628 | 17.9916686 | 1.49811014 | 216.072324 | cg15169829 | 0.04478393 | 7.52295575 | 1.04809785 | 53.9976902 |
| cg04674143 | 0.0226869  | 9978.19542 | 3.62511422 | 27465171.5 | cg25446604 | 0.04481011 | 0.17100716 | 0.03046435 | 0.95992372 |
| cg03453744 | 0.02269048 | 23.0228293 | 1.55054893 | 341.847111 | cg16044565 | 0.04487028 | 7.8386E+10 | 1.77547996 | 3.46E+21   |
| cg17603132 | 0.0227061  | 5.28298075 | 1.26187526 | 22.1177849 | cg07914457 | 0.04487037 | 12.4236652 | 1.05935513 | 145.699446 |
| cg11521979 | 0.02270638 | 8.66737794 | 1.35226079 | 55.5539589 | cg07270460 | 0.04487131 | 2.1365E+13 | 2.01831641 | 2.26E+26   |
| cg08602346 | 0.02270808 | 0.19868374 | 0.04947569 | 0.79787111 | cg10815165 | 0.04487603 | 18.8528604 | 1.06943322 | 332.353939 |
| cg01066472 | 0.02271623 | 6.77035856 | 1.30622436 | 35.0917931 | cg11572305 | 0.04487654 | 2121.99663 | 1.19134597 | 3779649.1  |
| cg20384898 | 0.02271649 | 3.81321067 | 1.2055697  | 12.0611654 | cg02611419 | 0.04490754 | 0.16741335 | 0.0291885  | 0.9602147  |
| cg21851967 | 0.02271783 | 4353.48276 | 3.22275248 | 5880939.42 | cg22714033 | 0.04492696 | 5145.37855 | 1.21332247 | 21820184.8 |
| cg01516119 | 0.02271928 | 1319.23773 | 2.72758799 | 638068.579 | cg01425188 | 0.04492793 | 13.8112737 | 1.06119305 | 179.751725 |
| cg18152871 | 0.02272067 | 6.25E-18   | 9.88E-33   | 0.00395801 | cg19657320 | 0.04495248 | 4802844.22 | 1.4138421  | 1.6315E+13 |
| cg26951614 | 0.02272274 | 25.0503492 | 1.56792444 | 400.223365 | cg13679837 | 0.04496977 | 723904020  | 1.58027709 | 3.3161E+17 |
| cg14334298 | 0.02274075 | 4.80604746 | 1.24487147 | 18.5546    | cg17822282 | 0.04497879 | 4.68E-08   | 3.19E-15   | 0.68530126 |
| cg03511487 | 0.02274768 | 9886140687 | 24.7792817 | 3.9443E+18 | cg03675258 | 0.04499109 | 6.33154819 | 1.04207966 | 38.46971   |
| cg00547414 | 0.02274799 | 33.6351324 | 1.63286913 | 692.843112 | cg05118960 | 0.04501972 | 8.39536506 | 1.04837556 | 67.2298716 |
| cg05721376 | 0.02274857 | 8.67045111 | 1.35154681 | 55.6227295 | cg26008908 | 0.0450348  | 7.35655186 | 1.04516197 | 51.7803523 |



|            |            |            |            |            |            |            |            |            |            |
|------------|------------|------------|------------|------------|------------|------------|------------|------------|------------|
| cg09920522 | 0.02274891 | 138168369  | 13.6567197 | 1.3979E+15 | cg16905506 | 0.0450524  | 7.4612109  | 1.04532031 | 53.2560857 |
| cg25446197 | 0.0227557  | 1289664.85 | 7.11160692 | 2.3388E+11 | cg17371249 | 0.0450644  | 1.3413E+11 | 1.75712897 | 1.02E+22   |
| cg05714559 | 0.02276216 | 62.1610313 | 1.77824721 | 2172.92274 | cg06763124 | 0.04508382 | 0.03933668 | 0.00166106 | 0.93155837 |
| cg25490477 | 0.02279222 | 11.4076244 | 1.40332261 | 92.7326998 | cg10549973 | 0.04508646 | 59.6876771 | 1.09368119 | 3257.4564  |
| cg21624854 | 0.0227934  | 2292841.83 | 7.67877918 | 6.8463E+11 | cg06443918 | 0.04509229 | 667182.878 | 1.34088776 | 3.3197E+11 |
| cg21041329 | 0.02280398 | 276104.046 | 5.71441093 | 1.3341E+10 | cg16191009 | 0.04511608 | 22.9800529 | 1.07060446 | 493.256706 |
| cg26430382 | 0.02280527 | 23869999.5 | 10.6257394 | 5.3622E+13 | cg07951301 | 0.04511763 | 10.7404356 | 1.05300967 | 109.549759 |
| cg04990724 | 0.02280626 | 6.9133E+11 | 44.3594427 | 1.08E+22   | cg05153861 | 0.04512771 | 172910517  | 1.5095774  | 1.9806E+16 |
| cg22307331 | 0.02280709 | 5.91053838 | 1.28036831 | 27.2846991 | cg07125725 | 0.04515079 | 10.9052625 | 1.05297868 | 112.941272 |
| cg03431903 | 0.02281045 | 28587.542  | 4.16647227 | 196148565  | cg19782271 | 0.04515203 | 11.0669664 | 1.05329931 | 116.280096 |
| cg00983948 | 0.02281398 | 5.08292558 | 1.25369272 | 20.6080262 | cg02670343 | 0.04517045 | 33.5865388 | 1.07854513 | 1045.90486 |
| cg08639762 | 0.02281869 | 9.40666691 | 1.36563766 | 64.7941875 | cg26694487 | 0.0451862  | 16096.3175 | 1.23087545 | 210493628  |
| cg02303873 | 0.02282791 | 171388.34  | 5.33787006 | 5502937072 | cg06104975 | 0.04518623 | 12.1186522 | 1.05495704 | 139.211101 |
| cg09478396 | 0.02282923 | 5.40818558 | 1.26434704 | 23.1332619 | cg20425447 | 0.04521051 | 5329504721 | 1.61255626 | 1.7614E+19 |
| cg24668061 | 0.02283497 | 8.46260015 | 1.34540829 | 53.229642  | cg22043720 | 0.04521393 | 1613.25278 | 1.17053707 | 2223410.61 |
| cg20975074 | 0.02284166 | 6.92951239 | 1.30845763 | 36.6982782 | cg15445332 | 0.04522911 | 6701069971 | 1.61735474 | 2.78E+19   |
| cg19628553 | 0.02284771 | 12.1628016 | 1.4146586  | 104.572044 | cg01185682 | 0.0452312  | 4.8210457  | 1.03397552 | 22.4787544 |
| cg23514016 | 0.02285303 | 6.40965014 | 1.29418964 | 31.7446638 | cg04678743 | 0.04525481 | 13.8902758 | 1.05718009 | 182.504158 |
| cg07948472 | 0.02285324 | 280.627054 | 2.18688166 | 36010.8849 | cg25206802 | 0.04527052 | 0.00059896 | 4.19E-07   | 0.8553164  |
| cg10869957 | 0.02287355 | 0.07267222 | 0.00759704 | 0.69517233 | cg04326808 | 0.0452719  | 7.35985635 | 1.042923   | 51.9381443 |
| cg01589129 | 0.02287839 | 4.19003024 | 1.21975105 | 14.3933907 | cg13821072 | 0.04527242 | 197.423061 | 1.11769938 | 34871.5099 |
| cg11674713 | 0.02287858 | 1.8259E+10 | 26.469945  | 1.2594E+19 | cg25930229 | 0.04529318 | 8.53000862 | 1.04595109 | 69.5644834 |
| cg26061304 | 0.02288481 | 1812.48286 | 2.82899157 | 1161224.42 | cg17927777 | 0.04529711 | 26.5063501 | 1.07104069 | 655.984972 |
| cg01747518 | 0.02289106 | 13.6020416 | 1.43577012 | 128.861531 | cg21045608 | 0.04530048 | 10.3211775 | 1.05005654 | 101.448543 |
| cg03450370 | 0.02289757 | 15.8833903 | 1.46678634 | 171.996479 | cg20446334 | 0.04530231 | 3.39701068 | 1.02590938 | 11.2482465 |
| cg22351880 | 0.02289897 | 21426044.1 | 10.3631518 | 4.4299E+13 | cg00917031 | 0.04530518 | 25.6081869 | 1.07014047 | 612.797339 |
| cg02208899 | 0.02289953 | 12133312.3 | 9.57760839 | 1.5371E+13 | cg12959887 | 0.04531176 | 29315753.1 | 1.43175646 | 6.0025E+14 |
| cg17117049 | 0.02290186 | 10.8427002 | 1.39113643 | 84.5094302 | cg14360865 | 0.04532479 | 9.64007387 | 1.04829502 | 88.6496862 |
| cg21014483 | 0.02290667 | 4.60459753 | 1.23547489 | 17.1612703 | cg04897804 | 0.04536709 | 11.6748429 | 1.05198514 | 129.566429 |
| cg22548015 | 0.02291028 | 3.2959E+10 | 28.5899344 | 3.7996E+19 | cg26243475 | 0.04536972 | 1.5446E+14 | 1.9608408  | 1.22E+28   |

|            |            |            |            |            |            |            |            |            |            |
|------------|------------|------------|------------|------------|------------|------------|------------|------------|------------|
| cg04920683 | 0.02291521 | 264582.147 | 5.63098281 | 1.2432E+10 | cg18882819 | 0.04540737 | 8.24837436 | 1.04407171 | 65.1637995 |
| cg24008238 | 0.02292022 | 4.18538558 | 1.21910249 | 14.3691384 | cg02045669 | 0.04542525 | 7.04727305 | 1.04055359 | 47.7284959 |
| cg09245319 | 0.02292114 | 18.719618  | 1.49989958 | 233.631705 | cg04691829 | 0.04543023 | 12.2365112 | 1.05224891 | 142.297325 |
| cg01803238 | 0.02292614 | 23.4923831 | 1.54763135 | 356.604343 | cg02886027 | 0.04543851 | 772.285147 | 1.14450327 | 521120.705 |
| cg03786924 | 0.02292966 | 394.302375 | 2.28599267 | 68011.7503 | cg02801839 | 0.04543912 | 26395.5612 | 1.22952503 | 566662438  |
| cg11424962 | 0.02294032 | 102.820931 | 1.89754101 | 5571.49694 | cg02329038 | 0.04544791 | 5.15455836 | 1.03377464 | 25.7014159 |
| cg02851730 | 0.02294809 | 826.952004 | 2.5306314  | 270228.852 | cg11555438 | 0.04548573 | 9.12906897 | 1.04541605 | 79.7193618 |
| cg05916700 | 0.02294813 | 11.9894445 | 1.40961976 | 101.975571 | cg03877492 | 0.04550113 | 128.643926 | 1.10209115 | 15016.235  |
| cg08753297 | 0.02295736 | 9.63070904 | 1.36739892 | 67.8299178 | cg21433558 | 0.04551341 | 4.95421341 | 1.03245361 | 23.7727199 |
| cg17822282 | 0.02296076 | 2.33E-07   | 4.49E-13   | 0.12131471 | cg19638477 | 0.04552915 | 4.55156124 | 1.03059684 | 20.1016624 |
| cg18342621 | 0.02296106 | 814.519135 | 2.52395473 | 262857.892 | cg00928397 | 0.04553495 | 9.31249692 | 1.04531278 | 82.9633012 |
| cg08165784 | 0.02296228 | 10.1993662 | 1.37818016 | 75.4814741 | cg22325530 | 0.04555842 | 4.8844827  | 1.03182741 | 23.12225   |
| cg00036588 | 0.0229696  | 270.301413 | 2.16660214 | 33722.3215 | cg23693200 | 0.04555955 | 124.0313   | 1.09988002 | 13986.765  |
| cg17641346 | 0.02297179 | 97434.3817 | 4.88372475 | 1943897173 | cg14658900 | 0.04559883 | 389569.719 | 1.28650962 | 1.1797E+11 |
| cg11457534 | 0.02297237 | 0.11475875 | 0.01775726 | 0.74164431 | cg19974445 | 0.0456012  | 2146955216 | 1.52241305 | 3.0277E+18 |
| cg19024632 | 0.02297317 | 8.3865738  | 1.34123178 | 52.4403171 | cg07640390 | 0.04560323 | 814775.945 | 1.3048681  | 5.0876E+11 |
| cg01283289 | 0.02298302 | 10.2188413 | 1.37812462 | 75.7730577 | cg07677850 | 0.04565526 | 0.00944467 | 9.76E-05   | 0.91388241 |
| cg13470499 | 0.02298444 | 14342.0339 | 3.74574505 | 54914024.8 | cg04527260 | 0.04565866 | 0.00098741 | 1.11E-06   | 0.87497253 |
| cg21702506 | 0.02298844 | 19.9438619 | 1.51118548 | 263.209005 | cg10116014 | 0.04565883 | 0.09906524 | 0.01026172 | 0.95636197 |
| cg01244303 | 0.02299088 | 4862.84985 | 3.22534211 | 7331721.05 | cg03112433 | 0.0456862  | 4.99383037 | 1.03131769 | 24.1810472 |
| cg05311410 | 0.02299744 | 3.46429685 | 1.18689714 | 10.1115356 | cg24183484 | 0.04568927 | 78.3720727 | 1.08716189 | 5649.7398  |
| cg15426734 | 0.02300049 | 5.31345904 | 1.2589713  | 22.42533   | cg15777760 | 0.04569494 | 109.159322 | 1.09395421 | 10892.3732 |
| cg21552528 | 0.02300365 | 1611.90461 | 2.76800922 | 938666.121 | cg12436713 | 0.04569535 | 8475816.62 | 1.35694022 | 5.2942E+13 |
| cg01731685 | 0.02300722 | 176.692313 | 2.04057977 | 15299.6585 | cg16493531 | 0.04569717 | 77196.3799 | 1.24015723 | 4805262521 |
| cg12184886 | 0.02301228 | 4.09017454 | 1.2142335  | 13.7778506 | cg11072113 | 0.04570343 | 11.5501318 | 1.04783321 | 127.315629 |
| cg21771463 | 0.02301488 | 8.21600244 | 1.33669248 | 50.4997949 | cg26293512 | 0.04571932 | 10.6348234 | 1.04600444 | 108.125229 |
| cg21557473 | 0.02301759 | 11.3772388 | 1.39795688 | 92.5933874 | cg05365729 | 0.04572297 | 40.1405302 | 1.07270844 | 1502.05043 |
| cg00506625 | 0.02302153 | 14879.6973 | 3.75637609 | 58941220.8 | cg14632140 | 0.04572547 | 6.89715952 | 1.03736678 | 45.8572708 |
| cg05803296 | 0.02302184 | 5.52308522 | 1.26541515 | 24.1062945 | cg08193467 | 0.0457319  | 14.9817177 | 1.05268417 | 213.218619 |
| cg24096828 | 0.02302287 | 75.7114877 | 1.81483035 | 3158.54833 | cg00014118 | 0.04574427 | 8.37324991 | 1.04100738 | 67.349488  |

|            |            |            |            |            |            |            |            |            |            |
|------------|------------|------------|------------|------------|------------|------------|------------|------------|------------|
| cg19643467 | 0.02302832 | 0.10993832 | 0.01638089 | 0.73783735 | cg17792849 | 0.04575271 | 45.6911516 | 1.07479926 | 1942.39186 |
| cg16177440 | 0.02303428 | 388.786101 | 2.27259027 | 66512.0478 | cg11478273 | 0.04579561 | 653.187374 | 1.12871386 | 377999.918 |
| cg09828721 | 0.02303491 | 3.5651E+17 | 260.791601 | 4.87E+32   | cg25217313 | 0.0458164  | 118785.778 | 1.24256003 | 1.1356E+10 |
| cg17639493 | 0.02303871 | 0.17301772 | 0.03811103 | 0.78547154 | cg17639493 | 0.04583762 | 0.19107541 | 0.03764435 | 0.96986165 |
| cg12501949 | 0.02306368 | 18.4289997 | 1.49274424 | 227.519237 | cg06976589 | 0.04584101 | 5.72181023 | 1.03274913 | 31.7009344 |
| cg19094597 | 0.02306978 | 207.795502 | 2.08231999 | 20735.9921 | cg17214455 | 0.04587426 | 8.20233495 | 1.0393142  | 64.7333586 |
| cg27289153 | 0.02307479 | 8.18131762 | 1.33485534 | 50.1432297 | cg24034106 | 0.04588133 | 1.29E-08   | 2.32E-16   | 0.71727515 |
| cg21490755 | 0.02307874 | 6.2357E+12 | 57.2627295 | 6.79E+23   | cg19270251 | 0.045889   | 38.5194415 | 1.0689319  | 1388.06539 |
| cg10401088 | 0.02308226 | 6.21167459 | 1.28516928 | 30.0232053 | cg01518659 | 0.04589959 | 1.70E-07   | 3.86E-14   | 0.75291936 |
| cg26397881 | 0.02308365 | 11054749.8 | 9.27867732 | 1.3171E+13 | cg12456825 | 0.04590257 | 8.96867956 | 1.04072425 | 77.2896501 |
| cg26680675 | 0.02308387 | 7.18051597 | 1.31098727 | 39.3289934 | cg17327184 | 0.04590789 | 21.9682821 | 1.05774948 | 456.256823 |
| cg04812556 | 0.02309403 | 6.64619706 | 1.29697966 | 34.0575391 | cg12058064 | 0.04591987 | 10.9366128 | 1.0442924  | 114.536406 |
| cg17827670 | 0.02310335 | 99.8511521 | 1.88095789 | 5300.62509 | cg03339560 | 0.04592849 | 17.6526582 | 1.05327228 | 295.855447 |
| cg25428429 | 0.02310482 | 6.19321318 | 1.28431168 | 29.8649386 | cg14677130 | 0.04594384 | 19.0436052 | 1.05450196 | 343.914863 |
| cg02424695 | 0.02311081 | 1.6027E+11 | 34.4476668 | 7.46E+20   | cg00442646 | 0.04596084 | 18.998772  | 1.05421864 | 342.389446 |
| cg09323092 | 0.02311268 | 0.10007647 | 0.01373389 | 0.72923955 | cg03149565 | 0.04596207 | 0.25071682 | 0.06443736 | 0.97550433 |
| cg02861504 | 0.02312204 | 0.01732493 | 0.00052342 | 0.5734463  | cg10810752 | 0.04596983 | 5.26616773 | 1.03016996 | 26.920337  |
| cg26392523 | 0.02313579 | 1.0204E+10 | 23.5236864 | 4.4265E+18 | cg24646841 | 0.04597145 | 0.21588631 | 0.0479024  | 0.97295537 |
| cg19811296 | 0.02313722 | 45890.9223 | 4.35266551 | 483836111  | cg21107197 | 0.04598031 | 15.1008598 | 1.04963598 | 217.25243  |
| cg04110544 | 0.02314634 | 5.14889557 | 1.25163929 | 21.1811228 | cg18189263 | 0.04602187 | 0.11388857 | 0.01347783 | 0.96236641 |
| cg23487303 | 0.02314751 | 64277.5981 | 4.55507394 | 907034590  | cg16225168 | 0.04602781 | 42.1419159 | 1.06817807 | 1662.58897 |
| cg01505767 | 0.02314993 | 6.78324304 | 1.29974519 | 35.4010819 | cg07740599 | 0.04603612 | 0.05168196 | 0.00281393 | 0.94921485 |
| cg08036278 | 0.02315425 | 25965.3769 | 4.02155188 | 167646923  | cg14781281 | 0.04603679 | 5.91444562 | 1.0317572  | 33.9039717 |
| cg26286839 | 0.02315601 | 5.4274866  | 1.26057581 | 23.3683771 | cg13475699 | 0.04603787 | 84515.2875 | 1.22078113 | 5851035564 |
| cg22345692 | 0.02315751 | 8.46833112 | 1.33970693 | 53.5285967 | cg10500167 | 0.04604475 | 0.10769194 | 0.01206021 | 0.96163766 |
| cg26607758 | 0.02315787 | 3.36298104 | 1.18060366 | 9.57954127 | cg15395441 | 0.04604575 | 8.3209992  | 1.03788232 | 66.7118288 |
| cg18720617 | 0.0231754  | 0.08013405 | 0.00906926 | 0.70804748 | cg08462879 | 0.04606844 | 7.08187014 | 1.03474209 | 48.4689712 |
| cg20009327 | 0.0231757  | 11.4581491 | 1.39593545 | 94.0510401 | cg05153345 | 0.04607153 | 6.1486521  | 1.03216814 | 36.6276785 |
| cg17665193 | 0.02318061 | 0.06176131 | 0.00558215 | 0.68333216 | cg19116023 | 0.04608065 | 7.60099544 | 1.03590417 | 55.7726606 |
| cg13205784 | 0.02318086 | 8640693123 | 22.8452865 | 3.2681E+18 | cg07238832 | 0.04608688 | 27.5061994 | 1.05923726 | 714.279075 |

|            |            |            |            |            |            |            |            |            |            |
|------------|------------|------------|------------|------------|------------|------------|------------|------------|------------|
| cg23369753 | 0.02318864 | 38093147.9 | 10.871522  | 1.3348E+14 | cg26691604 | 0.04609062 | 187.294959 | 1.09501517 | 32035.5395 |
| cg21413173 | 0.02319535 | 5.8794959  | 1.27389982 | 27.1359424 | cg20058667 | 0.04609884 | 1030064.16 | 1.2708036  | 8.3493E+11 |
| cg16440442 | 0.0231965  | 32.5893254 | 1.60975813 | 659.766277 | cg20310435 | 0.0461     | 1216169.26 | 1.27436891 | 1.1606E+12 |
| cg17152135 | 0.02320021 | 383.658124 | 2.25441531 | 65291.2334 | cg12811135 | 0.04613928 | 0.02334695 | 0.00058131 | 0.93767633 |
| cg06767314 | 0.02320935 | 6.68845553 | 1.29632421 | 34.5094515 | cg13995101 | 0.04614015 | 493516.966 | 1.251659   | 1.9459E+11 |
| cg16897415 | 0.02321326 | 2.6721E+10 | 26.5292941 | 2.69E+19   | cg00528600 | 0.04615154 | 5197738.57 | 1.3021148  | 2.0748E+13 |
| cg02494572 | 0.02321768 | 11.1418363 | 1.38971852 | 89.3278126 | cg00689580 | 0.04620576 | 4.18106912 | 1.02436428 | 17.0655492 |
| cg05103992 | 0.02322674 | 198508.205 | 5.28363997 | 7458022846 | cg13841742 | 0.04621682 | 59.6151456 | 1.07099    | 3318.39287 |
| cg02854695 | 0.02323268 | 34.0729495 | 1.61828532 | 717.404944 | cg17345480 | 0.04622654 | 48.819441  | 1.06722449 | 2233.21132 |
| cg22083798 | 0.02323579 | 15.5205325 | 1.4535942  | 165.718141 | cg13249789 | 0.04623384 | 833.996897 | 1.11888332 | 621647.327 |
| cg08952506 | 0.0232414  | 7.7746803  | 1.32269724 | 45.6987825 | cg01941047 | 0.0462396  | 1.227E+12  | 1.59065144 | 9.46E+23   |
| cg15038664 | 0.02324353 | 11.1131765 | 1.38868823 | 88.9347864 | cg01064131 | 0.04625099 | 0.03529673 | 0.00131707 | 0.94592954 |
| cg04209460 | 0.02325118 | 189.931405 | 2.04450294 | 17644.3565 | cg20147819 | 0.04625292 | 20.1212089 | 1.05113748 | 385.1666   |
| cg24676486 | 0.02325744 | 4.6542E+11 | 38.8997669 | 5.57E+21   | cg02969706 | 0.04625786 | 0.2133111  | 0.04668314 | 0.97469079 |
| cg08964780 | 0.02325827 | 4.62824479 | 1.23217124 | 17.3844748 | cg08444060 | 0.0462634  | 92125452.4 | 1.35502593 | 6.2634E+15 |
| cg07048210 | 0.02327173 | 22.3071836 | 1.52625953 | 326.03265  | cg13484341 | 0.0462758  | 17.3698529 | 1.04826411 | 287.820395 |
| cg08242069 | 0.0232735  | 253473.207 | 5.44297252 | 1.1804E+10 | cg18632254 | 0.04629369 | 9885020.73 | 1.30296513 | 7.4993E+13 |
| cg00237825 | 0.02327741 | 0.15928826 | 0.03258248 | 0.77872373 | cg24797508 | 0.04630835 | 12.4860167 | 1.04217987 | 149.59089  |
| cg08535411 | 0.02328595 | 23736.9969 | 3.93955293 | 143022579  | cg02831290 | 0.04631785 | 470.437361 | 1.10565688 | 200162.741 |
| cg16472904 | 0.02328605 | 13.213282  | 1.42087686 | 122.875407 | cg24405664 | 0.04632302 | 612648.353 | 1.2425783  | 3.0206E+11 |
| cg05204389 | 0.02329097 | 724.133516 | 2.44962601 | 214060.982 | cg10277546 | 0.04633618 | 2.3698E+10 | 1.47393759 | 3.81E+20   |
| cg14159026 | 0.02329217 | 3.34250744 | 1.17841983 | 9.48079429 | cg04114121 | 0.04634442 | 1264.90627 | 1.12269139 | 1425135.95 |
| cg23840481 | 0.02329439 | 30426.5872 | 4.07271685 | 227311951  | cg05768041 | 0.04636889 | 1732.28224 | 1.12749881 | 2661467.78 |
| cg25864727 | 0.02329705 | 0.19341266 | 0.04677585 | 0.79973865 | cg23816347 | 0.04638275 | 6.03829482 | 1.02924281 | 35.4250755 |
| cg13908395 | 0.02329711 | 2267.94741 | 2.86042183 | 1798191.23 | cg25692259 | 0.04638392 | 7584975.27 | 1.2889839  | 4.4633E+13 |
| cg04022108 | 0.02329716 | 3311.91791 | 3.01159675 | 3642187.56 | cg09539395 | 0.04646198 | 0.00062031 | 4.32E-07   | 0.89069684 |
| cg08367083 | 0.0232982  | 6.97520085 | 1.30236897 | 37.3576369 | cg20950465 | 0.04646867 | 4.13225957 | 1.02244293 | 16.7007552 |
| cg02478520 | 0.02330915 | 5.7873E+12 | 54.322372  | 6.17E+23   | cg16841327 | 0.04647352 | 4955.18338 | 1.1421459  | 21497991.1 |
| cg19641924 | 0.02330979 | 7.06416126 | 1.30443093 | 38.2560497 | cg14283602 | 0.04649507 | 33820095.5 | 1.30883709 | 8.739E+14  |
| cg19387936 | 0.02331473 | 9.29704964 | 1.35396263 | 63.8386393 | cg02205221 | 0.04649755 | 18083.3214 | 1.16424413 | 280874519  |

|            |            |            |            |            |            |            |            |            |            |
|------------|------------|------------|------------|------------|------------|------------|------------|------------|------------|
| cg03224126 | 0.02331546 | 14.5995503 | 1.43958973 | 148.060842 | cg09961689 | 0.04652112 | 26.0226871 | 1.05149374 | 644.017379 |
| cg04945388 | 0.02331637 | 49.4276004 | 1.69905771 | 1437.90742 | cg01535453 | 0.04652878 | 23.6848121 | 1.04985536 | 534.331053 |
| cg06958211 | 0.02333236 | 30.8377499 | 1.59299853 | 596.966539 | cg24884519 | 0.04653896 | 3.99638447 | 1.02146098 | 15.6355349 |
| cg04468971 | 0.02333237 | 1.3975E+10 | 23.8630454 | 8.1847E+18 | cg25355076 | 0.04655356 | 1.8239E+11 | 1.48545376 | 2.24E+22   |
| cg20776123 | 0.02333564 | 125753.614 | 4.92496902 | 3210978877 | cg22076311 | 0.0465593  | 24.9809508 | 1.0502519  | 594.188788 |
| cg24902075 | 0.02333601 | 8165226073 | 22.1720433 | 3.007E+18  | cg18018798 | 0.04657311 | 2181450.81 | 1.24790473 | 3.8134E+12 |
| cg14658651 | 0.02333635 | 3869254.61 | 7.8419969  | 1.9091E+12 | cg08775774 | 0.04658836 | 95.8176288 | 1.07134624 | 8569.60865 |
| cg00701946 | 0.02333831 | 6.399198   | 1.28659178 | 31.8280714 | cg23047335 | 0.04660449 | 212.16375  | 1.08386662 | 41530.439  |
| cg02699703 | 0.02333996 | 116.910497 | 1.90859345 | 7161.32829 | cg06965373 | 0.04661588 | 6.52846663 | 1.02850647 | 41.4395805 |
| cg20461826 | 0.02335442 | 30.169037  | 1.58751737 | 573.329658 | cg10825332 | 0.04661896 | 68672736.2 | 1.31007991 | 3.5997E+15 |
| cg02913948 | 0.02336267 | 15449662   | 9.43807838 | 2.529E+13  | cg03839625 | 0.04667273 | 821.851451 | 1.10388428 | 611875.555 |
| cg27477990 | 0.02336511 | 445362.153 | 5.83353018 | 3.4001E+10 | cg00034101 | 0.04670531 | 14.7045377 | 1.03997111 | 207.912919 |
| cg01592312 | 0.02336751 | 5180117.3  | 8.13435689 | 3.2988E+12 | cg09551160 | 0.04671539 | 20720.5673 | 1.15541307 | 371591703  |
| cg02571738 | 0.02336822 | 11.607404  | 1.39428323 | 96.631606  | cg00202389 | 0.04671714 | 0.04852336 | 0.00246031 | 0.95699817 |
| cg22986077 | 0.02336945 | 10.3712629 | 1.37313468 | 78.3339731 | cg12361311 | 0.04673755 | 85017521.8 | 1.30155905 | 5.5533E+15 |
| cg09750385 | 0.02336956 | 598.112389 | 2.37923834 | 150358.383 | cg23483563 | 0.04674192 | 7.59541423 | 1.02965955 | 56.0285362 |
| cg21589273 | 0.02337365 | 115833.278 | 4.85685509 | 2762558894 | cg13053408 | 0.04674271 | 43.0268615 | 1.05571212 | 1753.61331 |
| cg19937878 | 0.02337423 | 10618.8057 | 3.51303321 | 32097343.9 | cg14312538 | 0.04674274 | 4.39779989 | 1.02157493 | 18.9321833 |
| cg24294159 | 0.02337543 | 21.3798849 | 1.51445034 | 301.825333 | cg08087125 | 0.04674556 | 5.4208E+10 | 1.42745459 | 2.06E+21   |
| cg13388731 | 0.02338325 | 17.1228115 | 1.46935121 | 199.537506 | cg17083504 | 0.04677707 | 9044.38313 | 1.13870055 | 71837030.7 |
| cg01027532 | 0.02339279 | 11.8746504 | 1.39806188 | 100.859142 | cg01486387 | 0.04682181 | 6068.46616 | 1.13026349 | 32582032.3 |
| cg00215224 | 0.02339787 | 27.6648417 | 1.56755164 | 488.241311 | cg06904356 | 0.04682874 | 0.15918082 | 0.02600015 | 0.97455323 |
| cg16926284 | 0.02339869 | 15065286.1 | 9.37098691 | 2.422E+13  | cg25682080 | 0.04684622 | 10.6516974 | 1.03354701 | 109.776    |
| cg24865406 | 0.02340307 | 17045743.2 | 9.52466205 | 3.0506E+13 | cg09920051 | 0.04685358 | 3.1977E+12 | 1.4928029  | 6.85E+24   |
| cg21252609 | 0.02341164 | 10742971.9 | 8.93996669 | 1.291E+13  | cg07757611 | 0.04685608 | 6.60564305 | 1.02659654 | 42.5040593 |
| cg04015486 | 0.023416   | 88015336.1 | 11.8770996 | 6.5224E+14 | cg22584335 | 0.04689715 | 88437.6938 | 1.16913784 | 6689737867 |
| cg05967404 | 0.02341966 | 7.95852114 | 1.32385584 | 47.8436223 | cg08711724 | 0.04690979 | 134380469  | 1.29138816 | 1.3983E+16 |
| cg06537680 | 0.02342751 | 2978256165 | 19.0951114 | 4.6452E+17 | cg02774160 | 0.04694518 | 6.45622247 | 1.02550612 | 40.6460846 |
| cg25212453 | 0.02342869 | 32.9594609 | 1.60408203 | 677.226003 | cg25533361 | 0.04694976 | 9026.98051 | 1.1306707  | 72069062.1 |
| cg03153397 | 0.02342947 | 2316.54911 | 2.85036552 | 1882705.84 | cg19478371 | 0.04697066 | 475.803778 | 1.08605437 | 208451.107 |

|            |            |            |            |            |            |            |            |            |            |
|------------|------------|------------|------------|------------|------------|------------|------------|------------|------------|
| cg16233311 | 0.02343076 | 17.3123837 | 1.47030112 | 203.848468 | cg03131236 | 0.04697202 | 0.00034908 | 1.36E-07   | 0.8989381  |
| cg24183484 | 0.02344029 | 74.2011696 | 1.78952949 | 3076.68222 | cg00636737 | 0.04697659 | 11.1633361 | 1.03276717 | 120.666184 |
| cg14099685 | 0.02344219 | 55.8877849 | 1.72220609 | 1813.62992 | cg05569109 | 0.04697814 | 1334.13227 | 1.10088675 | 1616795.66 |
| cg26164440 | 0.02344294 | 1.7954E+11 | 33.153594  | 9.72E+20   | cg10224098 | 0.04700888 | 3.48593116 | 1.01664427 | 11.9527709 |
| cg17386181 | 0.02345101 | 71.3734852 | 1.77965096 | 2862.45702 | cg11314310 | 0.04701093 | 3.16227645 | 1.0153248  | 9.8490575  |
| cg04953552 | 0.02345433 | 8.35782433 | 1.33203891 | 52.4408313 | cg04657044 | 0.04701169 | 13.2806394 | 1.03474635 | 170.45277  |
| cg11647690 | 0.02345692 | 7.56486451 | 1.31418552 | 43.5457354 | cg20092936 | 0.0470213  | 4.14267342 | 1.0188861  | 16.8436326 |
| cg26842775 | 0.02346665 | 6.73757991 | 1.2936454  | 35.0907468 | cg03616995 | 0.04702331 | 2.5335E+11 | 1.41257428 | 4.54E+22   |
| cg06193043 | 0.023467   | 7.33557229 | 1.30857151 | 41.1216509 | cg04254119 | 0.04703322 | 0.15141433 | 0.02350077 | 0.97555509 |
| cg07357081 | 0.02347714 | 24.7250461 | 1.54144244 | 396.594702 | cg04832210 | 0.04703398 | 2053.13107 | 1.10513498 | 3814327.9  |
| cg11306587 | 0.02347759 | 9.06453115 | 1.34628969 | 61.0312367 | cg18813989 | 0.04703876 | 289822.23  | 1.17889315 | 7.1251E+10 |
| cg26608305 | 0.02348191 | 0.14761059 | 0.02820281 | 0.77257872 | cg11993754 | 0.04707022 | 0.01013482 | 0.00010901 | 0.94229293 |
| cg14558573 | 0.02348828 | 105.695969 | 1.87454124 | 5959.66497 | cg16101252 | 0.04707643 | 56238.0659 | 1.15174344 | 2746028290 |
| cg15624376 | 0.02349493 | 4.86088759 | 1.23753779 | 19.0929346 | cg01650726 | 0.0470885  | 29.5971082 | 1.0445387  | 838.63701  |
| cg10407113 | 0.02349675 | 57.4336697 | 1.72618793 | 1910.93123 | cg24889708 | 0.04709554 | 5.64088751 | 1.0224471  | 31.121035  |
| cg00047287 | 0.02350002 | 20.368171  | 1.50101356 | 276.38817  | cg24441975 | 0.04711102 | 21421.5134 | 1.13571951 | 404044510  |
| cg20254282 | 0.02350088 | 332033293  | 14.0671211 | 7.8371E+15 | cg08454455 | 0.04712182 | 4.8119634  | 1.02017566 | 22.6970635 |
| cg16748413 | 0.0235028  | 6.74986051 | 1.29340709 | 35.2252723 | cg13458803 | 0.04713588 | 6.17114484 | 1.02329045 | 37.2162455 |
| cg11413751 | 0.02350324 | 52218240.3 | 10.9607773 | 2.4877E+14 | cg18613421 | 0.04714039 | 13.705546  | 1.0336178  | 181.732542 |
| cg11044163 | 0.02350395 | 7.58016259 | 1.31376411 | 43.7360593 | cg23346960 | 0.04717239 | 5593.37653 | 1.11378219 | 28089747.9 |
| cg01044129 | 0.02350484 | 7.9874615  | 1.3230456  | 48.2217251 | cg03935183 | 0.04718789 | 14.3037355 | 1.03359155 | 197.947486 |
| cg03845289 | 0.02350831 | 0.00020124 | 1.27E-07   | 0.31776631 | cg22375689 | 0.04719923 | 0.15891303 | 0.02583443 | 0.97750744 |
| cg11920449 | 0.02351827 | 8.58281676 | 1.33568148 | 55.1514298 | cg06649737 | 0.04719964 | 7.37986926 | 1.02502463 | 53.1328408 |
| cg15681626 | 0.02352908 | 4.26159548 | 1.21540931 | 14.9424526 | cg12943155 | 0.04721245 | 9.9796876  | 1.02872171 | 96.813515  |
| cg22484594 | 0.0235354  | 0.06090489 | 0.00540515 | 0.68627218 | cg07915528 | 0.04722337 | 71.8393193 | 1.05380195 | 4897.39823 |
| cg14214182 | 0.02353792 | 14.9902096 | 1.43934775 | 156.116814 | cg01999333 | 0.0472245  | 0.13011033 | 0.01735712 | 0.97531733 |
| cg02614549 | 0.02354523 | 0.07360844 | 0.00769521 | 0.70410018 | cg08850949 | 0.04723845 | 188.644311 | 1.06597263 | 33384.2304 |
| cg03181248 | 0.02354673 | 4.25710536 | 1.21504361 | 14.9154696 | cg26875384 | 0.04724822 | 13.5289429 | 1.03215207 | 177.330746 |
| cg15392111 | 0.02354805 | 135.944306 | 1.93570025 | 9547.37407 | cg17597901 | 0.04725131 | 12.5197787 | 1.03114443 | 152.010576 |
| cg12430467 | 0.02354839 | 552.746382 | 2.33741969 | 130711.897 | cg07840972 | 0.04725692 | 2655.00586 | 1.1001851  | 6407154.71 |

|            |            |            |            |            |            |            |            |            |            |
|------------|------------|------------|------------|------------|------------|------------|------------|------------|------------|
| cg14180029 | 0.02354877 | 8.15543848 | 1.32599935 | 50.159283  | cg06236061 | 0.04727027 | 27.6908486 | 1.04083254 | 736.701697 |
| cg17735372 | 0.02355074 | 7.91352336 | 1.32060836 | 47.4204569 | cg06439982 | 0.04727558 | 3.0092E+10 | 1.33666273 | 6.77E+20   |
| cg08067617 | 0.02355243 | 8.45655601 | 1.33241417 | 53.6720045 | cg20066782 | 0.0472948  | 21.906419  | 1.03754673 | 462.524896 |
| cg05816193 | 0.02355991 | 6.54550381 | 1.28720087 | 33.2843311 | cg13233166 | 0.04732484 | 43.6760192 | 1.0456011  | 1824.40001 |
| cg03677069 | 0.02356266 | 5.15994434 | 1.24667415 | 21.3568441 | cg13696236 | 0.04733804 | 9.92393368 | 1.02732755 | 95.8647117 |
| cg12074985 | 0.02356685 | 9.50321036 | 1.35320592 | 66.7385545 | cg14219044 | 0.04736409 | 267483.166 | 1.15645397 | 6.1868E+10 |
| cg24165760 | 0.02357039 | 32.159504  | 1.59387316 | 648.880804 | cg10758227 | 0.04738887 | 36.6509964 | 1.04236528 | 1288.69943 |
| cg02400334 | 0.02358069 | 39.9795145 | 1.64077024 | 974.153205 | cg01045118 | 0.04742638 | 8.38582074 | 1.02443814 | 68.644447  |
| cg00417576 | 0.02358169 | 16.2322495 | 1.45373944 | 181.247008 | cg00777652 | 0.04743006 | 669306.625 | 1.16425233 | 3.8477E+11 |
| cg04337056 | 0.02358909 | 0.15657641 | 0.03144265 | 0.77971075 | cg00579105 | 0.04743408 | 193.320718 | 1.06140071 | 35210.924  |
| cg08700546 | 0.02359224 | 60.19724   | 1.73293199 | 2091.08478 | cg23089445 | 0.04743901 | 18.21958   | 1.03333436 | 321.244609 |
| cg05542338 | 0.02361227 | 4.17970304 | 1.21134346 | 14.4219357 | cg16007090 | 0.04744426 | 30533.8998 | 1.12347035 | 829856377  |
| cg16164732 | 0.0236142  | 231.620056 | 2.0748198  | 25856.6311 | cg21583565 | 0.04745392 | 387.738784 | 1.06923167 | 140606.914 |
| cg25076597 | 0.02361715 | 4.30351118 | 1.21603913 | 15.2299445 | cg00662646 | 0.04746013 | 18251.7603 | 1.11619608 | 298448239  |
| cg25193742 | 0.02362222 | 455622.68  | 5.73074983 | 3.6224E+10 | cg00013475 | 0.04746018 | 13.8767045 | 1.02990486 | 186.971568 |
| cg13959647 | 0.02362331 | 10.9974521 | 1.37885427 | 87.7133694 | cg09459581 | 0.04746897 | 8.79525642 | 1.02456953 | 75.5014988 |
| cg14188840 | 0.02362355 | 13.0069994 | 1.41020516 | 119.969802 | cg02254152 | 0.04747608 | 312.809788 | 1.06605057 | 91787.3559 |
| cg12544957 | 0.02362541 | 18.2981208 | 1.47614202 | 226.821824 | cg16792202 | 0.04747679 | 1198.29449 | 1.08208492 | 1326984.29 |
| cg17046776 | 0.02362775 | 7.91446583 | 1.31932258 | 47.4779788 | cg01573194 | 0.04750812 | 8.7233573  | 1.0240885  | 74.3070181 |
| cg00684824 | 0.02362901 | 14.6235203 | 1.43238312 | 149.294797 | cg00445566 | 0.04750871 | 4906092.9  | 1.1844294  | 2.0322E+13 |
| cg07447157 | 0.02363713 | 52.466651  | 1.6993874  | 1619.84811 | cg21267231 | 0.04751712 | 23.1275265 | 1.03499004 | 516.79964  |
| cg01166827 | 0.02363914 | 649.582894 | 2.37999868 | 177293.349 | cg20586124 | 0.04752734 | 338.156395 | 1.06555711 | 107314.518 |
| cg20355694 | 0.02364325 | 13791.0099 | 3.58207605 | 53095454.1 | cg05235884 | 0.04753882 | 0.18794343 | 0.03596938 | 0.98202232 |
| cg09132763 | 0.02364601 | 25.9894408 | 1.54654781 | 436.747591 | cg26259537 | 0.04754299 | 4.27037566 | 1.01585202 | 17.9515401 |
| cg00051979 | 0.02364609 | 141.637953 | 1.94054338 | 10337.9856 | cg20912226 | 0.04754586 | 156978.928 | 1.13821713 | 2.165E+10  |
| cg02670545 | 0.02365043 | 0.07823407 | 0.00860746 | 0.71107765 | cg20837456 | 0.0475599  | 0.00123328 | 1.63E-06   | 0.9304732  |
| cg22815056 | 0.02366336 | 2719.9553  | 2.87957768 | 2569181.2  | cg07213036 | 0.04758346 | 4.16480453 | 1.0153154  | 17.0839492 |
| cg20655350 | 0.02366413 | 7.58906812 | 1.31132328 | 43.9204853 | cg20778688 | 0.04758697 | 42.1100082 | 1.04059164 | 1704.08134 |
| cg24798540 | 0.02366431 | 11.7377396 | 1.39007103 | 99.1133021 | cg21878918 | 0.04761979 | 191.545313 | 1.0566846  | 34721.4362 |
| cg27533013 | 0.02366655 | 22140589.3 | 9.59797996 | 5.1074E+13 | cg26477573 | 0.04762107 | 4.64511423 | 1.01623524 | 21.2323736 |

|            |            |            |            |            |            |            |            |            |            |
|------------|------------|------------|------------|------------|------------|------------|------------|------------|------------|
| cg01972009 | 0.02368054 | 14.3533325 | 1.42759278 | 144.311568 | cg09975039 | 0.04762405 | 6.86173291 | 1.02037528 | 46.1431978 |
| cg11847964 | 0.02368614 | 10.1951335 | 1.36369487 | 76.219945  | cg21767373 | 0.04762479 | 11804.9847 | 1.10314606 | 126327482  |
| cg26816421 | 0.02369492 | 25.1732117 | 1.53845024 | 411.901906 | cg05868023 | 0.04763109 | 21.848039  | 1.03272714 | 462.209998 |
| cg15755476 | 0.02370541 | 6.48439294 | 1.28341007 | 32.7622113 | cg26622291 | 0.04764994 | 8.78179579 | 1.02275903 | 75.4038196 |
| cg20140110 | 0.0237092  | 5.52834605 | 1.25632358 | 24.3270209 | cg20373747 | 0.04765043 | 25.5782282 | 1.03413964 | 632.647402 |
| cg22770592 | 0.02370967 | 12549.1584 | 3.52338598 | 44696033.3 | cg16621855 | 0.04766707 | 0.11719382 | 0.01404049 | 0.97819851 |
| cg01408654 | 0.02371058 | 4.91387265 | 1.23670658 | 19.524554  | cg03319638 | 0.04773044 | 14.7084645 | 1.02724746 | 210.600596 |
| cg17894755 | 0.02372904 | 6.97390359 | 1.29556936 | 37.5397357 | cg08526991 | 0.04774288 | 4.43274023 | 1.01491718 | 19.3603836 |
| cg10657141 | 0.02374745 | 11.8218081 | 1.38962818 | 100.570173 | cg18640660 | 0.04776898 | 15.2592438 | 1.02714522 | 226.690946 |
| cg04761177 | 0.02374958 | 0.05335463 | 0.00420619 | 0.67679289 | cg26475097 | 0.04777227 | 2308484.95 | 1.15463892 | 4.6154E+12 |
| cg05819594 | 0.02375093 | 12.702901  | 1.40292272 | 115.019659 | cg17778955 | 0.04778378 | 43.9305119 | 1.03761719 | 1859.92474 |
| cg27588321 | 0.02375185 | 13.760403  | 1.41792369 | 133.539408 | cg05819594 | 0.04787851 | 11.3919855 | 1.02298662 | 126.861224 |
| cg05126887 | 0.02375375 | 11.3552822 | 1.38206371 | 93.2970265 | cg11090139 | 0.04788949 | 6712.03136 | 1.0853281  | 41509443   |
| cg13455434 | 0.02375553 | 5.14767562 | 1.2438339  | 21.3039412 | cg26922546 | 0.04791517 | 12.514562  | 1.02346396 | 153.02372  |
| cg18877506 | 0.02375898 | 5.69195929 | 1.26054691 | 25.7018603 | cg17516247 | 0.0479175  | 11.2911165 | 1.0224723  | 124.6873   |
| cg12200478 | 0.02376258 | 7.16007306 | 1.29959659 | 39.4481231 | cg10316593 | 0.04795882 | 6046.43677 | 1.08137259 | 33808326.5 |
| cg22092811 | 0.02376436 | 6.71459197 | 1.28850362 | 34.990779  | cg12160586 | 0.04796858 | 0.07736564 | 0.00612398 | 0.97737724 |
| cg12045833 | 0.02376592 | 32.0660713 | 1.58656218 | 648.088642 | cg09339476 | 0.04799233 | 294.76217  | 1.05152571 | 82627.3061 |
| cg14519917 | 0.02376964 | 98.1744391 | 1.84116329 | 5234.85373 | cg12302189 | 0.04799532 | 3946.08216 | 1.07579016 | 14474536.9 |
| cg10316490 | 0.02377086 | 3.81056101 | 1.19484837 | 12.1524836 | cg09952946 | 0.04801833 | 9.84550518 | 1.0201441  | 95.019882  |
| cg23771949 | 0.02377515 | 0.12407977 | 0.02032264 | 0.7575685  | cg17125688 | 0.04802529 | 44.086573  | 1.03344745 | 1880.7206  |
| cg23176237 | 0.02377791 | 54487.3423 | 4.26635507 | 695879837  | cg10824915 | 0.04802595 | 35.0678617 | 1.0313834  | 1192.33539 |
| cg15702823 | 0.02377907 | 171798.571 | 4.97008011 | 5938485574 | cg26147668 | 0.04808787 | 6.98E-05   | 5.29E-09   | 0.92265845 |
| cg06838879 | 0.02378607 | 8.79707498 | 1.33528875 | 57.9563995 | cg11751707 | 0.04814474 | 4.61072264 | 1.01254952 | 20.9952826 |
| cg14621323 | 0.02379104 | 10.0826191 | 1.35963148 | 74.7696788 | cg11928161 | 0.04815069 | 2658.60713 | 1.06623886 | 6629088.62 |
| cg20588892 | 0.02379151 | 2035034174 | 17.2787156 | 2.3968E+17 | cg06796713 | 0.0481586  | 6.80402423 | 1.01565005 | 45.5813944 |
| cg24717875 | 0.02379884 | 21.1401999 | 1.50004486 | 297.929791 | cg22315048 | 0.04817306 | 23.8156359 | 1.02579891 | 552.919782 |
| cg21225608 | 0.02380891 | 707889.457 | 5.98526928 | 8.3723E+10 | cg15195412 | 0.04823369 | 14.5991124 | 1.02103796 | 208.742566 |
| cg13553473 | 0.02381346 | 242162.762 | 5.18859227 | 1.1302E+10 | cg00177496 | 0.04823375 | 346.089935 | 1.04644908 | 114461.607 |
| cg17621438 | 0.02382128 | 15.5321662 | 1.43928546 | 167.616635 | cg01294490 | 0.04824063 | 32.7704908 | 1.02735915 | 1045.30637 |



|            |            |            |            |            |            |            |            |            |            |
|------------|------------|------------|------------|------------|------------|------------|------------|------------|------------|
| cg01772385 | 0.02382323 | 409986.431 | 5.56004791 | 3.0232E+10 | cg00885546 | 0.04825877 | 38.6889949 | 1.02837736 | 1455.53411 |
| cg21198712 | 0.02382604 | 9.47909203 | 1.34786355 | 66.6634141 | cg03890222 | 0.04828492 | 6.98497538 | 1.01476178 | 48.0801329 |
| cg08918020 | 0.02382889 | 16.2369687 | 1.44760011 | 182.121534 | cg19839026 | 0.04831007 | 14.0388655 | 1.01981618 | 193.260069 |
| cg11571563 | 0.02383485 | 7.13460838 | 1.29783973 | 39.2210497 | cg19929126 | 0.04831811 | 5.93842449 | 1.01325549 | 34.8035473 |
| cg06644105 | 0.02384036 | 261.261828 | 2.0922027  | 32624.823  | cg00402533 | 0.04831981 | 12.519057  | 1.01883769 | 153.829005 |
| cg03416888 | 0.02384462 | 3.4937E+13 | 62.5231722 | 1.95E+25   | cg08757348 | 0.04832085 | 8.84349652 | 1.01621586 | 76.9594664 |
| cg06941635 | 0.02385146 | 15.1135731 | 1.43334834 | 159.361186 | cg23548719 | 0.04833208 | 461713799  | 1.15747439 | 1.8418E+17 |
| cg22671547 | 0.02385573 | 0.00400456 | 3.33E-05   | 0.48109152 | cg25835179 | 0.04833984 | 25.888701  | 1.02402329 | 654.501556 |
| cg13347514 | 0.02386088 | 2.6348E+15 | 110.527854 | 6.28E+28   | cg06000635 | 0.04834652 | 43.2236173 | 1.02774545 | 1817.84418 |
| cg02683846 | 0.02386211 | 22.0511321 | 1.50665467 | 322.736481 | cg02573089 | 0.04835276 | 4141987.09 | 1.11660514 | 1.5364E+13 |
| cg05775779 | 0.02386272 | 0.0366821  | 0.00208508 | 0.64533596 | cg10932427 | 0.04835649 | 205237.013 | 1.09236025 | 3.8561E+10 |
| cg12491555 | 0.02386533 | 105.719317 | 1.85427415 | 6027.4658  | cg09636214 | 0.04835841 | 3.6129561  | 1.0093092  | 12.9330554 |
| cg01010839 | 0.02387382 | 12.0866998 | 1.39102469 | 105.022084 | cg06939307 | 0.04836156 | 6.58465508 | 1.01366211 | 42.7733087 |
| cg14400118 | 0.0238783  | 7.88435645 | 1.31443142 | 47.2927501 | cg19370322 | 0.04837035 | 23460594.7 | 1.12921826 | 4.8742E+14 |
| cg23341126 | 0.02388059 | 841673.428 | 6.08758882 | 1.1637E+11 | cg09360748 | 0.04837548 | 295601.364 | 1.09408441 | 7.9866E+10 |
| cg25323497 | 0.02388351 | 6.7333904  | 1.28717371 | 35.2233316 | cg08527546 | 0.04837994 | 395511996  | 1.15132596 | 1.3587E+17 |
| cg01151699 | 0.02389109 | 7.61382114 | 1.30815912 | 44.3143892 | cg19910323 | 0.04838077 | 61899.3213 | 1.08166213 | 3542257682 |
| cg01706819 | 0.02389686 | 23.9859864 | 1.52250119 | 377.883147 | cg19631443 | 0.04840264 | 3.6088E+11 | 1.20534009 | 1.08E+23   |
| cg01072639 | 0.02390245 | 5.93129473 | 1.26547906 | 27.7999521 | cg14601444 | 0.04841153 | 11.3848416 | 1.01711906 | 127.433084 |
| cg06217494 | 0.02391184 | 316.479162 | 2.14064671 | 46789.1593 | cg20268054 | 0.04842523 | 0.10280675 | 0.01073688 | 0.98438512 |
| cg03628403 | 0.02391539 | 631774160  | 14.5626131 | 2.7408E+16 | cg05725263 | 0.04843481 | 13.0139328 | 1.0177999  | 166.400533 |
| cg18923197 | 0.02391545 | 22112.9952 | 3.75201548 | 130325836  | cg07114009 | 0.04845228 | 3.47157701 | 1.00849737 | 11.9503008 |
| cg24936695 | 0.02392793 | 0.17918062 | 0.04029236 | 0.79681848 | cg26631329 | 0.04846662 | 20141.2697 | 1.06902662 | 379476747  |
| cg14205663 | 0.02394203 | 0.10752223 | 0.01551858 | 0.74498009 | cg09424348 | 0.04847725 | 14.9311865 | 1.01824546 | 218.945567 |
| cg12886494 | 0.02394408 | 0.16783918 | 0.03565345 | 0.79010575 | cg01966966 | 0.04847792 | 872.255624 | 1.04630591 | 727158.154 |
| cg18746774 | 0.02394408 | 0.03574985 | 0.00198389 | 0.64421511 | cg10830649 | 0.04850284 | 17623.995  | 1.06639561 | 291266389  |
| cg21165793 | 0.02394745 | 467.187876 | 2.2507117  | 96975.7752 | cg07800524 | 0.04850582 | 22.7682879 | 1.02072004 | 507.871807 |
| cg22747507 | 0.02395764 | 26.9061916 | 1.54391096 | 468.902136 | cg19484164 | 0.04852461 | 44446.4366 | 1.0717974  | 1843152200 |
| cg19091677 | 0.02396435 | 62460192.6 | 10.6672494 | 3.6572E+14 | cg12610087 | 0.04853277 | 9.14854616 | 1.01436394 | 82.5107178 |
| cg02882785 | 0.02396747 | 6.91032639 | 1.29030843 | 37.0086793 | cg25994725 | 0.04853422 | 19.6492366 | 1.01935274 | 378.762411 |

|            |            |            |            |            |            |            |            |            |            |
|------------|------------|------------|------------|------------|------------|------------|------------|------------|------------|
| cg15587603 | 0.02396766 | 394265.007 | 5.46809031 | 2.8428E+10 | cg12992778 | 0.04853817 | 4167396.86 | 1.10278958 | 1.5748E+13 |
| cg25041148 | 0.02397012 | 8.2721E+10 | 27.5031583 | 2.49E+20   | cg01356198 | 0.04857119 | 5.52504173 | 1.01078025 | 30.2005171 |
| cg23510527 | 0.02397044 | 6.2188832  | 1.27245303 | 30.3936628 | cg18773129 | 0.04858554 | 209.869596 | 1.0337575  | 42606.9436 |
| cg21661138 | 0.02397215 | 49728.2813 | 4.16047821 | 594379260  | cg02605461 | 0.04859991 | 7.54524274 | 1.01249857 | 56.2279193 |
| cg07337598 | 0.02397918 | 6.57624191 | 1.28173088 | 33.7410595 | cg14957497 | 0.04861865 | 15938.9329 | 1.06042929 | 239572392  |
| cg16142306 | 0.0239814  | 4.29735379 | 1.21181811 | 15.2392916 | cg21724798 | 0.04862616 | 7.64429531 | 1.01234112 | 57.722886  |
| cg13529912 | 0.02398225 | 11484687.4 | 8.5168935  | 1.5487E+13 | cg08375849 | 0.04862777 | 36.1118939 | 1.02183821 | 1276.19898 |
| cg27110548 | 0.02398489 | 107.368247 | 1.85168307 | 6225.65524 | cg24361162 | 0.04867041 | 4.69115617 | 1.00905997 | 21.8093541 |
| cg07116997 | 0.0239856  | 7.85679874 | 1.31203109 | 47.0486462 | cg06025835 | 0.04870689 | 18.0538668 | 1.01655276 | 320.634719 |
| cg02819828 | 0.0239899  | 4.34374563 | 1.2134407  | 15.5492775 | cg14029891 | 0.04871407 | 4623675863 | 1.13379426 | 1.8856E+19 |
| cg17010747 | 0.02399131 | 12.061942  | 1.38813989 | 104.809642 | cg23562261 | 0.04872555 | 5.55712417 | 1.00963656 | 30.5868768 |
| cg18884037 | 0.02399252 | 6.0644873  | 1.26793165 | 29.0063002 | cg09490277 | 0.04873289 | 9.27456332 | 1.01245933 | 84.9589927 |
| cg18358754 | 0.02399506 | 1.0344E+16 | 128.505107 | 8.33E+29   | cg17366544 | 0.04874653 | 9.42374124 | 1.01241254 | 87.7180947 |
| cg14852540 | 0.02400125 | 287687.092 | 5.23189634 | 1.5819E+10 | cg02026377 | 0.0487504  | 2571.03414 | 1.04398674 | 6331705.44 |
| cg17927777 | 0.02401586 | 23.565206  | 1.51542393 | 366.444612 | cg02882785 | 0.0487542  | 7.02985837 | 1.01071553 | 48.8949733 |
| cg14574127 | 0.02401931 | 26296.0085 | 3.81400147 | 181300419  | cg21153962 | 0.04876824 | 330.329664 | 1.0318373  | 105750.865 |
| cg03221676 | 0.02402298 | 3.1223E+10 | 23.998255  | 4.0624E+19 | cg25864218 | 0.0487984  | 56030.438  | 1.05931976 | 2963609395 |
| cg21871261 | 0.02402907 | 14.6079475 | 1.4227123  | 149.989656 | cg22867063 | 0.04882963 | 6.98898304 | 1.01003013 | 48.3608186 |
| cg21915765 | 0.02406486 | 18096.4764 | 3.62109137 | 90437502.5 | cg14971941 | 0.04884552 | 53.6579417 | 1.02036838 | 2821.70121 |
| cg19590188 | 0.02407616 | 851716728  | 14.8437717 | 4.887E+16  | cg10860308 | 0.04885032 | 0.11328906 | 0.01297611 | 0.98908001 |
| cg15107861 | 0.02407784 | 15.8825598 | 1.43725399 | 175.512268 | cg25528940 | 0.04887185 | 997130.994 | 1.07071839 | 9.286E+11  |
| cg18768283 | 0.02408036 | 322.783486 | 2.13340546 | 48837.0266 | cg08639762 | 0.04890007 | 10.4945172 | 1.01140174 | 108.893318 |
| cg24512935 | 0.02408058 | 163564626  | 11.9484399 | 2.2391E+15 | cg05721376 | 0.04890487 | 8.28140814 | 1.01020207 | 67.8891115 |
| cg21826946 | 0.02408371 | 173368713  | 12.0356318 | 2.4973E+15 | cg02806452 | 0.0489072  | 5.27363381 | 1.00799825 | 27.5905375 |
| cg13736128 | 0.02409371 | 8.09392467 | 1.3153499  | 49.8054673 | cg15857427 | 0.04890911 | 1152416.99 | 1.06903355 | 1.2423E+12 |
| cg11505841 | 0.02409866 | 7.07965526 | 1.29238975 | 38.7820459 | cg04936446 | 0.04891041 | 7014.85107 | 1.04321219 | 47169824   |
| cg11173279 | 0.02409895 | 43780.457  | 4.05721855 | 472424246  | cg03856286 | 0.04896792 | 16478.9887 | 1.04490488 | 259886879  |
| cg02886027 | 0.02410371 | 542.223032 | 2.28153601 | 128863.106 | cg25346720 | 0.04901267 | 753382.95  | 1.06030139 | 5.3531E+11 |
| cg13365753 | 0.02410943 | 8.07384431 | 1.3146564  | 49.5847902 | cg19112186 | 0.04902455 | 9.05154786 | 1.00946126 | 81.1626182 |
| cg00897404 | 0.02411188 | 49.1612273 | 1.6655152  | 1451.0983  | cg04264633 | 0.04903422 | 8.37413129 | 1.00903435 | 69.4982036 |

|            |            |            |            |            |            |            |            |            |            |
|------------|------------|------------|------------|------------|------------|------------|------------|------------|------------|
| cg02205746 | 0.02411239 | 3.69250111 | 1.18658576 | 11.4905849 | cg10088527 | 0.04903824 | 1143380664 | 1.09188042 | 1.1973E+18 |
| cg17129764 | 0.02411597 | 23.9294716 | 1.51551978 | 377.837108 | cg26360644 | 0.0490472  | 3.30E-05   | 1.14E-09   | 0.95783887 |
| cg05569109 | 0.02411813 | 159.965185 | 1.94344602 | 13166.7461 | cg08301503 | 0.04907163 | 5.60054677 | 1.00703243 | 31.1470844 |
| cg00027499 | 0.02412024 | 3494.92239 | 2.9100161  | 4197393.44 | cg20431441 | 0.04909807 | 28.4485839 | 1.01331719 | 798.685682 |
| cg04888113 | 0.02412058 | 27.9746558 | 1.54668806 | 505.972336 | cg20967975 | 0.04911259 | 7.72811383 | 1.00798099 | 59.250863  |
| cg03271650 | 0.0241213  | 98.2931451 | 1.8232311  | 5299.13205 | cg21793358 | 0.0491306  | 11.5533488 | 1.0093622  | 132.241794 |
| cg21844316 | 0.02412137 | 20714.8806 | 3.67319268 | 116821065  | cg05641885 | 0.04915269 | 0.01262595 | 0.00016202 | 0.98390584 |
| cg00506343 | 0.02412475 | 5.50590775 | 1.25016225 | 24.2488686 | cg12385383 | 0.04916573 | 261.245488 | 1.02054347 | 66875.3531 |
| cg06070445 | 0.02412757 | 5.89478872 | 1.26134098 | 27.5488822 | cg15104158 | 0.04918048 | 6.74047664 | 1.0068718  | 45.1239428 |
| cg04769770 | 0.02412919 | 1.4292E+12 | 38.9616017 | 5.24E+22   | cg02007493 | 0.04918859 | 657027169  | 1.07481119 | 4.0164E+17 |
| cg13415434 | 0.02413534 | 15261.0644 | 3.52625216 | 66047485.1 | cg27025247 | 0.04920928 | 3794916.28 | 1.05385402 | 1.3665E+13 |
| cg00370303 | 0.02413653 | 759.097859 | 2.38117423 | 241993.866 | cg03114558 | 0.04922214 | 5849.21439 | 1.02998466 | 33217299.5 |
| cg16875032 | 0.02415136 | 0.04542474 | 0.00309109 | 0.66753437 | cg04677344 | 0.04922437 | 1697.47323 | 1.02557904 | 2809549.78 |
| cg07362258 | 0.02415391 | 146338.731 | 4.73330174 | 4524331065 | cg24008238 | 0.04922994 | 4.21505018 | 1.00486258 | 17.6806744 |
| cg27369431 | 0.02415551 | 12.4787392 | 1.39081612 | 111.962271 | cg01534125 | 0.04924268 | 5.61090683 | 1.00573517 | 31.302749  |
| cg19280530 | 0.02415641 | 12725.7025 | 3.43922058 | 47087268.8 | cg10297971 | 0.04925318 | 20682631.1 | 1.05662215 | 4.0485E+14 |
| cg25751690 | 0.02415862 | 3.7641E+12 | 43.9948139 | 3.22E+23   | cg09418959 | 0.04925698 | 856435251  | 1.06919738 | 6.8601E+17 |
| cg10517814 | 0.0241668  | 370.81754  | 2.16576688 | 63490.512  | cg20376123 | 0.04925886 | 70.423233  | 1.01390053 | 4891.43816 |
| cg09023136 | 0.02417157 | 9.27897504 | 1.337695   | 64.3639826 | cg04562522 | 0.04926068 | 2729802.14 | 1.04913681 | 7.1028E+12 |
| cg02603726 | 0.02417363 | 1.2742E+11 | 28.198103  | 5.76E+20   | cg22364205 | 0.04926245 | 163.648346 | 1.01659648 | 26343.5706 |
| cg03345120 | 0.02417499 | 19723327   | 8.96568043 | 4.3389E+13 | cg00856204 | 0.0492626  | 92649.8402 | 1.03761065 | 8272845798 |
| cg03216222 | 0.02418311 | 700020069  | 14.2744694 | 3.4329E+16 | cg25261331 | 0.04926884 | 0.03393737 | 0.00116429 | 0.98922904 |
| cg12690148 | 0.02418574 | 4.92353924 | 1.23126746 | 19.6880365 | cg00243313 | 0.0492746  | 5.18058534 | 1.0052373  | 26.6986357 |
| cg22122013 | 0.0241931  | 70.8402479 | 1.74343319 | 2878.42445 | cg08931196 | 0.0492936  | 44386.5465 | 1.03364193 | 1906042568 |
| cg01405107 | 0.02419343 | 10.154626  | 1.35312208 | 76.2063016 | cg19848291 | 0.0492955  | 108.479032 | 1.01455757 | 11598.8494 |
| cg26871717 | 0.02419398 | 5576.30829 | 3.08151299 | 10090891.8 | cg09265173 | 0.04930667 | 376427.828 | 1.03973156 | 1.3628E+11 |
| cg22471129 | 0.02419596 | 16.1315501 | 1.43728805 | 181.054109 | cg03075725 | 0.04930749 | 48422.9646 | 1.03324058 | 2269349023 |
| cg07352798 | 0.02419896 | 114.451781 | 1.85572528 | 7058.80898 | cg14033806 | 0.04933205 | 17.2613684 | 1.00836202 | 295.483997 |
| cg07287384 | 0.02420283 | 325.97023  | 2.12688176 | 49958.8612 | cg08847885 | 0.0493645  | 141916.353 | 1.03354192 | 1.9487E+10 |
| cg01515239 | 0.02421086 | 463.306359 | 2.22599645 | 96429.9748 | cg14283447 | 0.04936881 | 8.4059664  | 1.00589774 | 70.2459784 |

|            |            |            |            |            |            |            |            |            |            |
|------------|------------|------------|------------|------------|------------|------------|------------|------------|------------|
| cg14367396 | 0.0242123  | 13860.102  | 3.46646517 | 55417382.7 | cg04238038 | 0.04938792 | 10.8045341 | 1.00639464 | 115.996204 |
| cg00161556 | 0.02421236 | 20.047616  | 1.4781749  | 271.894014 | cg00326648 | 0.04939909 | 11.8996281 | 1.00653273 | 140.682111 |
| cg09284397 | 0.02422213 | 199.699641 | 1.99397553 | 20000.2186 | cg19136717 | 0.04940542 | 2952.09221 | 1.02100435 | 8535564.47 |
| cg17942371 | 0.02422222 | 2.3314E+10 | 22.4289524 | 2.4235E+19 | cg02283238 | 0.04942015 | 6.54823076 | 1.00477876 | 42.6753907 |
| cg10963518 | 0.02422344 | 3.90682057 | 1.19427646 | 12.7803297 | cg06761377 | 0.0494234  | 8.23001692 | 1.00533147 | 67.3739764 |
| cg16993579 | 0.02422359 | 360.835505 | 2.15363951 | 60456.8504 | cg23861541 | 0.049444   | 0.20696886 | 0.04300055 | 0.99617592 |
| cg00110785 | 0.02422399 | 9.00139677 | 1.3314586  | 60.854422  | cg12507643 | 0.04945602 | 8.28361287 | 1.00504393 | 68.2738734 |
| cg06856329 | 0.02422589 | 6.2771E+13 | 62.721228  | 6.28E+25   | cg06168026 | 0.0494907  | 4.60734207 | 1.00340883 | 21.1554855 |
| cg02290575 | 0.02423142 | 343.958564 | 2.13964169 | 55293.1337 | cg06023487 | 0.04952354 | 6.6181E+14 | 1.07369845 | 4.08E+29   |
| cg27317046 | 0.02423602 | 3.73640184 | 1.18723628 | 11.7589892 | cg25247520 | 0.04952968 | 7.45146756 | 1.00413941 | 55.2954779 |
| cg20672465 | 0.02423673 | 259.771997 | 2.06245814 | 32718.9624 | cg26894854 | 0.04953459 | 23.3955482 | 1.00643698 | 543.850915 |
| cg15438211 | 0.02423756 | 280.081738 | 2.0827123  | 37665.2021 | cg24425171 | 0.049547   | 5.75014358 | 1.00347105 | 32.9497807 |
| cg19856002 | 0.02423956 | 108438.095 | 4.52380874 | 2599318653 | cg20601684 | 0.04956477 | 3751.60046 | 1.01578533 | 13855787.8 |
| cg20999932 | 0.02424331 | 4.39619053 | 1.21256217 | 15.9385568 | cg19299094 | 0.04956803 | 34.2843973 | 1.00669864 | 1167.59857 |
| cg07953400 | 0.0242443  | 4340696.9  | 7.30998474 | 2.5775E+12 | cg19386159 | 0.04957023 | 60784.3748 | 1.02091494 | 3619048038 |
| cg26426223 | 0.02424461 | 987860178  | 14.8147474 | 6.5871E+16 | cg27223183 | 0.04959678 | 355135.081 | 1.02278568 | 1.2331E+11 |
| cg04565008 | 0.02424787 | 50.2081206 | 1.66467064 | 1514.32681 | cg02258703 | 0.04960874 | 9.39087138 | 1.00383847 | 87.8512507 |
| cg12421755 | 0.02425224 | 3.50681854 | 1.177327   | 10.445506  | cg10143811 | 0.04961457 | 3.26017217 | 1.00199329 | 10.6075787 |
| cg07800892 | 0.0242645  | 0.17289078 | 0.03755413 | 0.79595027 | cg23737055 | 0.04963951 | 550332571  | 1.03222229 | 2.9341E+17 |
| cg16909733 | 0.02426536 | 4.93137957 | 1.23056468 | 19.7620693 | cg04380939 | 0.04965074 | 8.1649102  | 1.00321082 | 66.4523921 |
| cg10194844 | 0.02426563 | 51.4770924 | 1.66937089 | 1587.35908 | cg23054456 | 0.04965913 | 0.16615479 | 0.02768134 | 0.99732941 |
| cg19037922 | 0.02427039 | 4.75018665 | 1.22453063 | 18.4268754 | cg16788391 | 0.04966793 | 1052.88874 | 1.01015188 | 1097433.69 |
| cg15317837 | 0.02427845 | 3040748.87 | 6.95731575 | 1.329E+12  | cg27201679 | 0.04966915 | 4.33142899 | 1.00212199 | 18.7215502 |
| cg17953385 | 0.02427956 | 7.21289108 | 1.29271442 | 40.2453913 | cg18396533 | 0.04967127 | 12.7038371 | 1.00365882 | 160.79914  |
| cg02456292 | 0.02428091 | 47.8089707 | 1.65280397 | 1382.92121 | cg07357279 | 0.04968645 | 4.32239903 | 1.00200791 | 18.6456945 |
| cg09945896 | 0.02428759 | 0.03889716 | 0.00230671 | 0.65590875 | cg22469141 | 0.04970499 | 4166849.7  | 1.01984586 | 1.7025E+13 |
| cg01256539 | 0.02429445 | 0.08952568 | 0.01096436 | 0.73099056 | cg01893681 | 0.04971066 | 754.993519 | 1.00841398 | 565259.133 |
| cg02125271 | 0.0242957  | 12.2688522 | 1.38475022 | 108.701722 | cg02679582 | 0.0497229  | 12053.1395 | 1.01144337 | 143634508  |
| cg00356183 | 0.02429917 | 3.11175143 | 1.15878216 | 8.35618401 | cg12206225 | 0.04974115 | 427005.705 | 1.01477123 | 1.7968E+11 |
| cg14883008 | 0.02430952 | 118791825  | 11.1623567 | 1.2642E+15 | cg05132828 | 0.04977504 | 13.1008652 | 1.00253169 | 171.199246 |

|            |            |            |            |            |
|------------|------------|------------|------------|------------|
| cg07825681 | 0.02430965 | 0.18783436 | 0.04383106 | 0.80494862 |
| cg07098722 | 0.02431387 | 0.07754535 | 0.00837856 | 0.71769871 |
| cg27585376 | 0.0243183  | 20.3166725 | 1.47785609 | 279.301337 |
| cg21346043 | 0.02431864 | 5.59609615 | 1.25026266 | 25.0477704 |
| cg07635623 | 0.02432253 | 604858522  | 13.7650516 | 2.6578E+16 |
| cg11248715 | 0.02432519 | 14.2626426 | 1.41141387 | 144.12709  |
| cg10835172 | 0.02433336 | 40185.246  | 3.9512669  | 408692716  |
| cg26594902 | 0.02433999 | 267707.462 | 5.04967082 | 1.4192E+10 |
| cg24673765 | 0.02434015 | 17.0704414 | 1.44431181 | 201.756965 |
| cg16243019 | 0.02434329 | 9.3941124  | 1.33669846 | 66.0203856 |
| cg12975295 | 0.02434695 | 15531.1733 | 3.49041206 | 69108558.1 |
| cg11786946 | 0.02434909 | 0.00019205 | 1.12E-07   | 0.3301027  |
| cg06961160 | 0.02435027 | 35.0212078 | 1.58490127 | 773.855772 |
| cg21338852 | 0.02435431 | 88.6434903 | 1.78725497 | 4396.50106 |
| cg17167832 | 0.02436837 | 24.5858369 | 1.51338726 | 399.410906 |
| cg06733311 | 0.02437664 | 128.536857 | 1.87410882 | 8815.77607 |
| cg02698708 | 0.02438576 | 25.5688122 | 1.52056035 | 429.949497 |
| cg17147878 | 0.02438639 | 143.206221 | 1.89992768 | 10794.1065 |
| cg07830160 | 0.02440029 | 3.86501518 | 1.19086078 | 12.5441551 |
| cg26090107 | 0.02440422 | 3.47659257 | 1.1746407  | 10.2896961 |
| cg13369332 | 0.02440798 | 954.225836 | 2.42569609 | 375375.526 |
| cg11104474 | 0.02440993 | 16.583409  | 1.43718368 | 191.353032 |
| cg08850949 | 0.02441038 | 122.215865 | 1.86008213 | 8030.13884 |
| cg04604946 | 0.02441052 | 19.3502214 | 1.46609397 | 255.393635 |
| cg00727675 | 0.02441273 | 5.78596688 | 1.25441854 | 26.6875939 |
| cg15232240 | 0.02441312 | 313.525753 | 2.10052301 | 46797.1059 |
| cg20484322 | 0.02441419 | 13.8581971 | 1.40415051 | 136.772821 |
| cg14044905 | 0.02441705 | 1.31E-08   | 1.78E-15   | 0.09599398 |
| cg08095637 | 0.02443375 | 8.71033387 | 1.32209357 | 57.3861924 |
| cg09286468 | 0.02444156 | 0.03384442 | 0.00177254 | 0.64621561 |

|            |            |            |            |            |
|------------|------------|------------|------------|------------|
| cg25342397 | 0.04977896 | 409.968701 | 1.00582651 | 167100.721 |
| cg04710768 | 0.04978132 | 8.34676121 | 1.00202921 | 69.5273375 |
| cg00979026 | 0.04979639 | 1369.77097 | 1.00644472 | 1864257.89 |
| cg04060561 | 0.04982128 | 7.70444128 | 1.00159524 | 59.2638752 |
| cg12104022 | 0.04982668 | 0.05861758 | 0.00344341 | 0.99785473 |
| cg09937190 | 0.04982991 | 5.88424404 | 1.00131753 | 34.5787693 |
| cg02382426 | 0.04983882 | 5.88660541 | 1.00124872 | 34.6089066 |
| cg06526137 | 0.04985913 | 40093.41   | 1.00654198 | 1597033769 |
| cg14615266 | 0.04988668 | 5.04614382 | 1.0008013  | 25.4431799 |
| cg10944735 | 0.04988932 | 10.6131958 | 1.00114233 | 112.5114   |
| cg20051715 | 0.04989335 | 21.8813721 | 1.00143805 | 478.106904 |
| cg03327649 | 0.04990659 | 22.7323393 | 1.001275   | 516.10122  |
| cg00138497 | 0.04992049 | 142.614845 | 1.0017235  | 20303.9999 |
| cg05213414 | 0.0499321  | 79.5295327 | 1.00129819 | 6316.74623 |
| cg22476252 | 0.04994734 | 9.83300303 | 1.00052561 | 96.6371548 |
| cg04354805 | 0.04995328 | 29635.4495 | 1.00210262 | 876417099  |
| cg25170591 | 0.04995491 | 3.9267835  | 1.00026927 | 15.4154777 |
| cg24241823 | 0.04996545 | 26.8574781 | 1.00049648 | 720.966183 |
| cg09805692 | 0.04998717 | 57.7721068 | 1.00022727 | 3336.85796 |

---

|            |            |            |            |            |
|------------|------------|------------|------------|------------|
| cg25793521 | 0.02444231 | 6.29493812 | 1.26772848 | 31.2576759 |
| cg15778012 | 0.02445225 | 8.38407202 | 1.31528317 | 53.4429887 |
| cg03534647 | 0.02445285 | 3.4839E+11 | 30.7293873 | 3.95E+21   |
| cg02276831 | 0.02445959 | 12.4301941 | 1.38360622 | 111.671748 |
| cg18632102 | 0.02447878 | 3.50E-07   | 8.29E-13   | 0.14754835 |
| cg24164786 | 0.02448031 | 20.8767628 | 1.47862729 | 294.759353 |
| cg27652893 | 0.02448197 | 16.4833655 | 1.4342938  | 189.432137 |
| cg01134183 | 0.02448431 | 66.3792368 | 1.71583707 | 2567.96123 |
| cg04632671 | 0.02448883 | 0.0057253  | 6.37E-05   | 0.51465287 |
| cg12763105 | 0.02449051 | 2.14E-05   | 1.82E-09   | 0.25071676 |
| cg03351412 | 0.02449824 | 6.4049E+12 | 44.3581818 | 9.25E+23   |
| cg05168062 | 0.02450165 | 55.7496007 | 1.67701931 | 1853.29886 |
| cg10919204 | 0.02450406 | 0.23380652 | 0.06589595 | 0.82957289 |
| cg13781389 | 0.02450995 | 1.3319E+11 | 26.9068517 | 6.59E+20   |
| cg11717738 | 0.02451725 | 11.6909481 | 1.3715338  | 99.6535904 |
| cg14865907 | 0.0245179  | 452.623949 | 2.19392353 | 93379.9364 |
| cg10473588 | 0.02452499 | 48998.113  | 4.0032579  | 599715317  |
| cg14153069 | 0.0245268  | 6.72089729 | 1.27722334 | 35.3661406 |
| cg09953959 | 0.02452849 | 764559.481 | 5.69572044 | 1.0263E+11 |
| cg22656956 | 0.02452896 | 44.8309474 | 1.62963817 | 1233.2884  |
| cg26640895 | 0.02453047 | 2.0957E+15 | 92.7648142 | 4.73E+28   |
| cg09089053 | 0.0245396  | 45.2567339 | 1.63121492 | 1255.61135 |
| cg01961105 | 0.02454036 | 5.42216365 | 1.24230865 | 23.6655026 |
| cg00455450 | 0.02454265 | 6189547172 | 18.0552199 | 2.1219E+18 |
| cg02494781 | 0.0245433  | 219694.026 | 4.84747573 | 9956824452 |
| cg03420907 | 0.02455299 | 4.72719377 | 1.22048398 | 18.3094258 |
| cg27342919 | 0.02456095 | 0.28716727 | 0.09677189 | 0.85215905 |
| cg12489322 | 0.02456605 | 8.9663E+10 | 25.3531891 | 3.17E+20   |
| cg10603826 | 0.02457541 | 63997.0349 | 4.12891071 | 991937285  |
| cg18274325 | 0.0245755  | 68882.4291 | 4.16798957 | 1138387936 |

|            |            |            |            |            |
|------------|------------|------------|------------|------------|
| cg16754467 | 0.02458022 | 4.29954906 | 1.20543806 | 15.3356051 |
| cg12106855 | 0.02458298 | 5.7838791  | 1.25207864 | 26.7181759 |
| cg02462253 | 0.02458409 | 5.70832142 | 1.24995673 | 26.0688492 |
| cg04114121 | 0.02458448 | 1136.06148 | 2.46226254 | 524166.561 |
| cg13352650 | 0.02458807 | 5767573.03 | 7.34170432 | 4.531E+12  |
| cg16096796 | 0.02459526 | 8.07453919 | 1.30654299 | 49.9012918 |
| cg10531737 | 0.02460119 | 8449401562 | 18.6386424 | 3.8303E+18 |
| cg01968002 | 0.02460159 | 8.96641352 | 1.32407266 | 60.7191538 |
| cg01805469 | 0.02460412 | 71256.2414 | 4.17799129 | 1215285431 |
| cg03419278 | 0.02460589 | 6.87E-11   | 9.42E-20   | 0.05007542 |
| cg04233770 | 0.02461609 | 14.7775548 | 1.41116344 | 154.748997 |
| cg05426966 | 0.02462898 | 5.84177706 | 1.2530585  | 27.23445   |
| cg16860686 | 0.02463865 | 9.14360841 | 1.32673138 | 63.0162034 |
| cg01650726 | 0.02464335 | 27.1689445 | 1.52462226 | 484.153726 |
| cg22156128 | 0.02465079 | 11.311832  | 1.36304874 | 93.8759844 |
| cg13296579 | 0.02465231 | 0.17448196 | 0.03804562 | 0.80019596 |
| cg25726357 | 0.02466481 | 12.04269   | 1.37369731 | 105.573755 |
| cg16705353 | 0.0246704  | 103.107958 | 1.80638565 | 5885.37166 |
| cg21712685 | 0.02468032 | 43692.5906 | 3.90516469 | 488850696  |
| cg09219813 | 0.02468432 | 8.29438309 | 1.30954418 | 52.5349139 |
| cg23910392 | 0.02469845 | 387.046872 | 2.13623061 | 70125.9877 |
| cg24925865 | 0.0246996  | 2483306.91 | 6.52530513 | 9.4506E+11 |
| cg25506900 | 0.02471503 | 8042.01923 | 3.1412392  | 20588713.3 |
| cg06002370 | 0.02472117 | 43.9566484 | 1.61835544 | 1193.92    |
| cg09636214 | 0.02472242 | 3.61083985 | 1.17747342 | 11.073001  |
| cg03935183 | 0.02472357 | 12.4513041 | 1.37831834 | 112.481254 |
| cg14007549 | 0.02472975 | 29.7584621 | 1.53971189 | 575.150501 |
| cg14497203 | 0.024733   | 7.65174453 | 1.29537233 | 45.1987378 |
| cg13744172 | 0.02473593 | 5.57694517 | 1.24426171 | 24.9966041 |
| cg16792613 | 0.02473927 | 497.715963 | 2.20238634 | 112478.531 |

|            |            |            |            |            |
|------------|------------|------------|------------|------------|
| cg03609308 | 0.02474556 | 189.227906 | 1.94719068 | 18389.1598 |
| cg19197795 | 0.02474856 | 36.562382  | 1.57992237 | 846.122444 |
| cg19824325 | 0.02474961 | 43.7828996 | 1.61648683 | 1185.86942 |
| cg17055959 | 0.02475628 | 15030.5334 | 3.39335132 | 66576347   |
| cg05888917 | 0.02476512 | 4.73126684 | 1.21817787 | 18.3757122 |
| cg23778358 | 0.02476711 | 0.22586268 | 0.06162146 | 0.82786017 |
| cg18640660 | 0.02476726 | 13.8844658 | 1.39658387 | 138.03567  |
| cg14823287 | 0.02476828 | 1.6646E+11 | 26.5889807 | 1.04E+21   |
| cg14021524 | 0.0247692  | 7390219.98 | 7.44789321 | 7.333E+12  |
| cg00699721 | 0.02477317 | 363277372  | 12.2064043 | 1.0812E+16 |
| cg23512654 | 0.02478778 | 845347048  | 13.5630391 | 5.2688E+16 |
| cg11386080 | 0.02479081 | 10.2788354 | 1.34382376 | 78.622257  |
| cg24344221 | 0.02479671 | 593329.596 | 5.39518342 | 6.5251E+10 |
| cg17214455 | 0.02480064 | 9.12495856 | 1.32350786 | 62.9122587 |
| cg15333318 | 0.02480349 | 7.70707195 | 1.29542974 | 45.8527052 |
| cg02637304 | 0.02480422 | 16.7497491 | 1.42934976 | 196.280928 |
| cg00282706 | 0.024806   | 0.1185156  | 0.01840503 | 0.76315795 |
| cg26712096 | 0.02480609 | 25.1592529 | 1.50493365 | 420.608581 |
| cg26620147 | 0.02480671 | 7.02341742 | 1.28021858 | 38.5312265 |
| cg10684940 | 0.02481025 | 15220.8325 | 3.38809792 | 68378703.2 |
| cg02641983 | 0.02481133 | 114.293047 | 1.82287882 | 7166.08284 |
| cg11848563 | 0.02481289 | 12.0467315 | 1.37069075 | 105.876355 |
| cg00765922 | 0.0248238  | 4.34750057 | 1.20453351 | 15.6913535 |
| cg06793967 | 0.0248287  | 0.01937842 | 0.00061867 | 0.60698459 |
| cg06791473 | 0.02482936 | 2184.68554 | 2.6469592  | 1803144.87 |
| cg22693994 | 0.02483052 | 46.7609569 | 1.62699344 | 1343.94339 |
| cg26440766 | 0.02483166 | 8.7494E+11 | 32.4801598 | 2.36E+22   |
| cg17084151 | 0.02484887 | 5.67785259 | 1.24562215 | 25.8810506 |
| cg24942416 | 0.02484923 | 6.6381628  | 1.27047957 | 34.6839149 |
| cg05641885 | 0.02486003 | 0.01105105 | 0.00021584 | 0.56580817 |



|            |            |            |            |            |
|------------|------------|------------|------------|------------|
| cg17581200 | 0.0248615  | 2542.50106 | 2.6941657  | 2399374.19 |
| cg04886060 | 0.02486225 | 6.12891059 | 1.25753909 | 29.8706778 |
| cg01819512 | 0.02486402 | 10.3637745 | 1.3438344  | 79.9263823 |
| cg27200454 | 0.02486545 | 818485.304 | 5.58807206 | 1.1988E+11 |
| cg06615378 | 0.02486753 | 2728.00414 | 2.71747041 | 2738578.7  |
| cg16262756 | 0.02486959 | 17190.4203 | 3.42872181 | 86186796.7 |
| cg15593510 | 0.02487143 | 0.21897931 | 0.0580951  | 0.82540419 |
| cg03324851 | 0.0248861  | 143.347527 | 1.87174472 | 10978.2671 |
| cg02272859 | 0.02488626 | 7.10268948 | 1.28083228 | 39.3870443 |
| cg19632236 | 0.02489012 | 6.16590793 | 1.25811062 | 30.2186628 |
| cg08747889 | 0.02489235 | 85.8160595 | 1.75405067 | 4198.50817 |
| cg02605461 | 0.02489277 | 7.10376196 | 1.28075789 | 39.4012282 |
| cg01937803 | 0.02489303 | 15.128538  | 1.40896838 | 162.439886 |
| cg00067742 | 0.02489343 | 0.25777406 | 0.0788468  | 0.84274148 |
| cg25198784 | 0.02489744 | 1414082.45 | 5.97149226 | 3.3486E+11 |
| cg02344701 | 0.02490659 | 0.00693493 | 9.00E-05   | 0.53419076 |
| cg27083176 | 0.02491549 | 2594191.09 | 6.43629503 | 1.0456E+12 |
| cg11550381 | 0.02491566 | 383186.545 | 5.05725291 | 2.9034E+10 |
| cg04544938 | 0.0249164  | 20897537.3 | 8.37201798 | 5.2163E+13 |
| cg06598256 | 0.02492206 | 617479.747 | 5.36802838 | 7.1028E+10 |
| cg24421410 | 0.02492366 | 5.55428236 | 1.24119827 | 24.8550561 |
| cg14273822 | 0.02492946 | 3.56145488 | 1.17354327 | 10.80826   |
| cg26898127 | 0.02493382 | 0.00771064 | 0.00010973 | 0.54181596 |
| cg07880384 | 0.02493402 | 22.389565  | 1.47929249 | 338.873227 |
| cg16265348 | 0.02493991 | 7.57739744 | 1.2904897  | 44.4923753 |
| cg05765761 | 0.02495853 | 0.09985892 | 0.01332492 | 0.74835747 |
| cg09775785 | 0.02496548 | 3169247.79 | 6.57108836 | 1.5285E+12 |
| cg06023487 | 0.02497287 | 4.5989E+14 | 69.7422778 | 3.03E+27   |
| cg08924619 | 0.02497933 | 8.03577086 | 1.2994255  | 49.6939713 |
| cg17299902 | 0.02498232 | 1368519.55 | 5.9039728  | 3.1722E+11 |

|            |            |            |            |            |
|------------|------------|------------|------------|------------|
| cg19882886 | 0.02498391 | 22.5081026 | 1.47888986 | 342.564174 |
| cg14335434 | 0.02498447 | 676.726357 | 2.26809954 | 201912.903 |
| cg21616552 | 0.02498557 | 107.675493 | 1.80026655 | 6440.16399 |
| cg17737146 | 0.02498687 | 4.44439802 | 1.206127   | 16.3769435 |
| cg27634164 | 0.02498759 | 0.12484525 | 0.02024298 | 0.76996249 |
| cg15048437 | 0.02499138 | 1863918283 | 14.6053082 | 2.3787E+17 |
| cg16830078 | 0.02499183 | 3304934.31 | 6.59008635 | 1.6574E+12 |
| cg20223677 | 0.02500015 | 0.26486329 | 0.08288778 | 0.84635591 |
| cg02929073 | 0.02500054 | 5.92518412 | 1.2503188  | 28.0790842 |
| cg24046271 | 0.02500141 | 167170.795 | 4.52683462 | 6173425179 |
| cg08113093 | 0.02500259 | 2.0719E+10 | 19.7333193 | 2.1754E+19 |
| cg26092468 | 0.02500411 | 32737.0282 | 3.68818854 | 290579779  |
| cg01585985 | 0.02500686 | 47173266.8 | 9.18797623 | 2.422E+14  |
| cg22487177 | 0.02502671 | 2162.41062 | 2.61945095 | 1785114.43 |
| cg00060374 | 0.02503192 | 4.72193711 | 1.21482952 | 18.3537605 |
| cg02205221 | 0.0250337  | 80016.2641 | 4.11779924 | 1554860287 |
| cg19764541 | 0.02503779 | 1019145.39 | 5.66302045 | 1.8341E+11 |
| cg24000528 | 0.02503997 | 11.6370455 | 1.36011124 | 99.5659946 |
| cg06796825 | 0.02504082 | 3148.47355 | 2.74393449 | 3612653.92 |
| cg21767373 | 0.02504104 | 24510.9927 | 3.54861449 | 169302348  |
| cg06511482 | 0.02504496 | 498.46794  | 2.1776822  | 114098.507 |
| cg21139076 | 0.02505681 | 617311.679 | 5.31000586 | 7.1765E+10 |
| cg03155239 | 0.02505844 | 609159701  | 12.5878112 | 2.9479E+16 |
| cg22648949 | 0.02507834 | 6.59438662 | 1.26611157 | 34.3460528 |
| cg20784775 | 0.02507987 | 32.0343111 | 1.54285909 | 665.126903 |
| cg14196353 | 0.0250828  | 23873617.3 | 8.36987991 | 6.8095E+13 |
| cg05818685 | 0.02509272 | 6.50333191 | 1.2637066  | 33.4676782 |
| cg25332377 | 0.02509539 | 10.1237482 | 1.33553973 | 76.7407178 |
| cg25512381 | 0.02509561 | 22.7627875 | 1.47787157 | 350.601841 |
| cg19401111 | 0.02509943 | 27.0010609 | 1.50963634 | 482.935706 |

|            |            |            |            |            |
|------------|------------|------------|------------|------------|
| cg05988291 | 0.02510375 | 5.40383225 | 1.23464743 | 23.6516129 |
| cg22960945 | 0.02510487 | 8.35356766 | 1.30368146 | 53.5269502 |
| cg20641531 | 0.02510743 | 0.22733841 | 0.0621882  | 0.83107004 |
| cg13847963 | 0.02511105 | 23.845955  | 1.48606156 | 382.642003 |
| cg20600850 | 0.02511569 | 7.94665508 | 1.2953985  | 48.7489578 |
| cg01596674 | 0.02512059 | 17.5145822 | 1.42962824 | 214.573677 |
| cg09353354 | 0.02512587 | 13625427   | 7.76978475 | 2.3894E+13 |
| cg16536824 | 0.02512692 | 9.27552504 | 1.32045441 | 65.1558767 |
| cg13247671 | 0.02513011 | 2.24E-06   | 2.55E-11   | 0.19730177 |
| cg17836177 | 0.02513149 | 11.8918334 | 1.36194958 | 103.833287 |
| cg25361850 | 0.02513161 | 17.2731797 | 1.42688382 | 209.100932 |
| cg06146234 | 0.02513395 | 7.63807531 | 1.28872043 | 45.2698607 |
| cg12876594 | 0.02514282 | 6.45010549 | 1.2617003  | 32.9744401 |
| cg07144296 | 0.02514558 | 36.1540948 | 1.56416526 | 835.665261 |
| cg23346960 | 0.0251575  | 7302.35754 | 3.03004089 | 17598582.9 |
| cg02933679 | 0.02515963 | 10.354331  | 1.33809581 | 80.1229405 |
| cg27345592 | 0.02516092 | 38150.9312 | 3.72249134 | 390999848  |
| cg19722847 | 0.02516688 | 92.3220738 | 1.75710324 | 4850.80507 |
| cg06326971 | 0.02516902 | 39.7891068 | 1.58214077 | 1000.65244 |
| cg15354705 | 0.02517088 | 3.09E+10   | 20.2474657 | 4.7157E+19 |
| cg02152119 | 0.02517695 | 28642.9835 | 3.58834375 | 228634869  |
| cg04734688 | 0.02518209 | 389293.12  | 4.96376308 | 3.0531E+10 |
| cg05390144 | 0.02519389 | 34.6376505 | 1.55423074 | 771.93611  |
| cg14400871 | 0.02519651 | 12044.8198 | 3.21792503 | 45084233.9 |
| cg26782361 | 0.0251988  | 13.8832633 | 1.38704022 | 138.961363 |
| cg00114963 | 0.02520561 | 238.579785 | 1.97516606 | 28817.9889 |
| cg03899598 | 0.02520842 | 16.0950857 | 1.41255054 | 183.392932 |
| cg24368167 | 0.02521102 | 9588.99323 | 3.12544511 | 29419422.8 |
| cg10601100 | 0.02522293 | 0.03618653 | 0.00197768 | 0.66212279 |
| cg26513180 | 0.02522462 | 28.5030204 | 1.51605877 | 535.877756 |

|            |            |            |            |            |
|------------|------------|------------|------------|------------|
| cg23772500 | 0.02522835 | 547729737  | 12.1687387 | 2.4654E+16 |
| cg24828620 | 0.02522846 | 4.38432044 | 1.20148308 | 15.9987819 |
| cg01783195 | 0.02522917 | 129.289907 | 1.82904994 | 9139.10532 |
| cg05883442 | 0.02522932 | 32.9341608 | 1.54336366 | 702.788962 |
| cg25098174 | 0.02523013 | 14.6185588 | 1.39526748 | 153.162217 |
| cg01250407 | 0.02523038 | 8.00007803 | 1.29462681 | 49.43606   |
| cg01441105 | 0.02526114 | 53764.8985 | 3.85968757 | 748937386  |
| cg07245011 | 0.0252645  | 9962364403 | 17.3593041 | 5.7173E+18 |
| cg13323474 | 0.0252777  | 60583.6904 | 3.91297783 | 938002641  |
| cg18862975 | 0.02528544 | 12.5427855 | 1.36783584 | 115.014875 |
| cg24693053 | 0.02528763 | 5.46226739 | 1.2339925  | 24.1787248 |
| cg23780961 | 0.0252914  | 387424616  | 11.5697383 | 1.2973E+16 |
| cg00955828 | 0.02529856 | 4.4418929  | 1.20267739 | 16.4054074 |
| cg22777668 | 0.02530229 | 20.9006274 | 1.45668568 | 299.883654 |
| cg20314660 | 0.02530296 | 930436562  | 12.876942  | 6.723E+16  |
| cg21678189 | 0.02530938 | 1511.19313 | 2.47341293 | 923301.021 |
| cg24918060 | 0.0253176  | 12.9935612 | 1.37315151 | 122.952661 |
| cg17492041 | 0.0253244  | 518459983  | 11.9472118 | 2.2499E+16 |
| cg17382841 | 0.02532514 | 11.2353258 | 1.34853786 | 93.6069721 |
| cg11206041 | 0.02532685 | 4.6760424  | 1.21003229 | 18.0700736 |
| cg18426477 | 0.02532756 | 12.6912447 | 1.36895269 | 117.657602 |
| cg07447260 | 0.02532938 | 2.49E-11   | 1.27E-20   | 0.04893655 |
| cg25055477 | 0.02532949 | 688.657501 | 2.24249966 | 211482.375 |
| cg12461469 | 0.02533356 | 468.151916 | 2.13772805 | 102522.964 |
| cg23849812 | 0.02533444 | 0.21386286 | 0.05533954 | 0.82648539 |
| cg14563754 | 0.02533934 | 1.316E+13  | 41.7408118 | 4.15E+24   |
| cg02304930 | 0.02534589 | 99.5291496 | 1.76489529 | 5612.82681 |
| cg08231730 | 0.02535063 | 7.60544517 | 1.28464038 | 45.0264502 |
| cg18108237 | 0.025352   | 1.12E-06   | 6.86E-12   | 0.18433394 |
| cg07212778 | 0.02535461 | 4.4760595  | 1.20321311 | 16.6513384 |

|            |            |            |            |            |
|------------|------------|------------|------------|------------|
| cg22090592 | 0.02535653 | 12.9632769 | 1.37193608 | 122.488613 |
| cg09459581 | 0.02535758 | 8.47531456 | 1.3018151  | 55.1775417 |
| cg05134500 | 0.02535843 | 132.913915 | 1.82840265 | 9662.04499 |
| cg06750292 | 0.0253707  | 12.1341708 | 1.3605018  | 108.223379 |
| cg08881680 | 0.02537242 | 3.60426168 | 1.1713067  | 11.0907777 |
| cg10832938 | 0.02537295 | 13.9872703 | 1.38451126 | 141.308876 |
| cg14227687 | 0.02537605 | 5.6093E+12 | 37.3259696 | 8.43E+23   |
| cg01386425 | 0.02537812 | 96.0685588 | 1.75565309 | 5256.82894 |
| cg02642822 | 0.025387   | 5.33565716 | 1.22918902 | 23.1609922 |
| cg08947062 | 0.02538824 | 12.0120443 | 1.35845119 | 106.215969 |
| cg16727916 | 0.02538874 | 27137966.3 | 8.242089   | 8.9355E+13 |
| cg27536187 | 0.02539091 | 976143.024 | 5.47026121 | 1.7419E+11 |
| cg17371249 | 0.02539413 | 8.3623E+10 | 22.1616653 | 3.16E+20   |
| cg25899024 | 0.02539616 | 9721.48117 | 3.099059   | 30495449.1 |
| cg12219828 | 0.02539655 | 18483139.4 | 7.85494119 | 4.3492E+13 |
| cg09131151 | 0.02540111 | 0.13724492 | 0.02405552 | 0.78302889 |
| cg21506220 | 0.0254069  | 1.89E-05   | 1.36E-09   | 0.26204319 |
| cg00051483 | 0.02541321 | 0.10822632 | 0.01540009 | 0.76057569 |
| cg21864868 | 0.02541445 | 6.39985133 | 1.25666669 | 32.5926496 |
| cg16749930 | 0.02541712 | 13.3056573 | 1.37506708 | 128.750457 |
| cg21649520 | 0.02541887 | 16.719483  | 1.41422007 | 197.664506 |
| cg24462260 | 0.02542452 | 257.290172 | 1.97933867 | 33444.6214 |
| cg19434107 | 0.02542835 | 8579.93149 | 3.04642445 | 24164467.4 |
| cg07849384 | 0.02542839 | 5.83858927 | 1.24236791 | 27.4388323 |
| cg02400595 | 0.02542839 | 0.08582627 | 0.00996316 | 0.73933822 |
| cg08277369 | 0.02543077 | 9.24151808 | 1.3145151  | 64.9712253 |
| cg19537645 | 0.02543592 | 3.1177E+10 | 19.5070431 | 4.9827E+19 |
| cg03302259 | 0.02543773 | 11.296814  | 1.34724654 | 94.7250573 |
| cg07218880 | 0.02544567 | 14.6524466 | 1.39084261 | 154.36268  |
| cg13714271 | 0.02544608 | 1822.97446 | 2.51598146 | 1320850.71 |

|            |            |            |            |            |
|------------|------------|------------|------------|------------|
| cg06318386 | 0.02545295 | 287.89762  | 2.00496768 | 41339.8384 |
| cg13736131 | 0.02545823 | 8.45114654 | 1.29968642 | 54.9531614 |
| cg16824282 | 0.02546138 | 0.00745278 | 0.00010137 | 0.54793626 |
| cg10513852 | 0.02546439 | 0.18096028 | 0.04039417 | 0.810677   |
| cg14019833 | 0.02549261 | 2113525.1  | 5.96353352 | 7.4905E+11 |
| cg06907744 | 0.02549263 | 36142.6564 | 3.6212168  | 360732783  |
| cg11378840 | 0.0254933  | 128.874288 | 1.81433333 | 9154.09637 |
| cg16806210 | 0.0255005  | 343.138831 | 2.04527874 | 57568.8071 |
| cg26575637 | 0.02550407 | 11.6496243 | 1.35103529 | 100.451666 |
| cg22927247 | 0.025513   | 7.86144394 | 1.2873239  | 48.0083535 |
| cg11555438 | 0.02551412 | 8.1242781  | 1.29250198 | 51.0667647 |
| cg05710032 | 0.02552002 | 12.3288593 | 1.36012481 | 111.755018 |
| cg27018502 | 0.02552352 | 35.582614  | 1.54849527 | 817.646938 |
| cg01988009 | 0.02552952 | 149992.452 | 4.30025296 | 5231723750 |
| cg02679582 | 0.02553126 | 51689.8403 | 3.77415607 | 707930339  |
| cg16376036 | 0.02553374 | 121.385672 | 1.79898135 | 8190.45807 |
| cg07974719 | 0.02554091 | 8.29062348 | 1.29527668 | 53.0654483 |
| cg20797766 | 0.02554236 | 24899.48   | 3.44912385 | 179751187  |
| cg09729613 | 0.02554761 | 5.3838773  | 1.2285678  | 23.5934352 |
| cg22946648 | 0.02554868 | 8.88324989 | 1.30612999 | 60.4167496 |
| cg03072286 | 0.02554997 | 11.1177501 | 1.34243545 | 92.0747195 |
| cg17355919 | 0.02555112 | 1447.91753 | 2.43463171 | 861101.561 |
| cg22424532 | 0.02555571 | 5.4367132  | 1.22993534 | 24.032036  |
| cg03965648 | 0.02555993 | 8.72858087 | 1.30313853 | 58.4650994 |
| cg19800926 | 0.02556036 | 16463422   | 7.61896639 | 3.5575E+13 |
| cg25256099 | 0.02556421 | 5.1088225  | 1.22051805 | 21.3844173 |
| cg19038034 | 0.02556642 | 15866.336  | 3.25962863 | 77229846.8 |
| cg06767637 | 0.02556754 | 5.81699598 | 1.23998782 | 27.2885278 |
| cg09692396 | 0.02557151 | 14.8100992 | 1.38985793 | 157.814    |
| cg00402533 | 0.02557335 | 13.116546  | 1.36935729 | 125.638342 |

|            |            |            |            |            |
|------------|------------|------------|------------|------------|
| cg01200642 | 0.02557826 | 2.2889E+10 | 18.4032518 | 2.8468E+19 |
| cg23018117 | 0.02558135 | 0.18108501 | 0.04039827 | 0.81171252 |
| cg06132502 | 0.02558266 | 8.69769082 | 1.30219253 | 58.0941943 |
| cg01461514 | 0.02558521 | 8.82384404 | 1.30444041 | 59.6886011 |
| cg09924165 | 0.02559332 | 4.86284767 | 1.21284895 | 19.4973063 |
| cg13415207 | 0.02559703 | 2.50E-07   | 3.99E-13   | 0.15654449 |
| cg01518659 | 0.02559712 | 3.37E-07   | 6.98E-13   | 0.16233661 |
| cg22343980 | 0.02560155 | 1.6575E+10 | 17.6344959 | 1.56E+19   |
| cg02451774 | 0.02560361 | 9.87549559 | 1.32215998 | 73.7621882 |
| cg19675288 | 0.02560398 | 3.93928329 | 1.18197514 | 13.1288318 |
| cg17711535 | 0.02561142 | 196458.594 | 4.41830034 | 8735481112 |
| cg08278489 | 0.02561304 | 6.42877457 | 1.25459595 | 32.9421935 |
| cg09106154 | 0.02561656 | 0.00206399 | 9.05E-06   | 0.47069785 |
| cg10971510 | 0.02561961 | 5.86982006 | 1.24067681 | 27.7709611 |
| cg12869659 | 0.02562135 | 6.13672789 | 1.24739432 | 30.1904768 |
| cg20733436 | 0.02562182 | 6.08326246 | 1.24605872 | 29.6985058 |
| cg14112754 | 0.02562633 | 6.38391158 | 1.2533417  | 32.5165333 |
| cg13486406 | 0.02562751 | 29.5550438 | 1.51053449 | 578.272539 |
| cg25006823 | 0.02563404 | 30.7859645 | 1.51785866 | 624.416251 |
| cg24062310 | 0.02564025 | 0.06856281 | 0.00651418 | 0.72163519 |
| cg17861295 | 0.02565241 | 3.73968129 | 1.17405757 | 11.9118657 |
| cg23176538 | 0.02565597 | 621.346061 | 2.1866024  | 176562.015 |
| cg08572535 | 0.02566063 | 12.2393907 | 1.356065   | 110.46866  |
| cg07744166 | 0.02566992 | 15.3821395 | 1.39407266 | 169.725885 |
| cg09423126 | 0.0256801  | 7.54859826 | 1.27836282 | 44.5736804 |
| cg23264525 | 0.02568145 | 27104.5736 | 3.45577617 | 212588396  |
| cg09731079 | 0.02568163 | 10.2445933 | 1.32665586 | 79.1099605 |
| cg20141824 | 0.02568648 | 46312.317  | 3.68697195 | 581732310  |
| cg01910527 | 0.02568694 | 0.20696632 | 0.05186622 | 0.82587588 |
| cg00208412 | 0.02569376 | 254381.525 | 4.53196732 | 1.4279E+10 |

|            |            |            |            |            |
|------------|------------|------------|------------|------------|
| cg12500707 | 0.02569836 | 11.0215344 | 1.33817049 | 90.7763405 |
| cg15233114 | 0.02569958 | 46534004.2 | 8.52488475 | 2.5401E+14 |
| cg19053239 | 0.02569958 | 3.81632545 | 1.17651694 | 12.3792012 |
| cg01879488 | 0.02569959 | 75.6181715 | 1.69052377 | 3382.44748 |
| cg06761377 | 0.02570256 | 7.16061796 | 1.26986012 | 40.3780296 |
| cg25791744 | 0.02570595 | 22403489.5 | 7.79611862 | 6.438E+13  |
| cg02131399 | 0.02571167 | 38835176.5 | 8.3293248  | 1.8107E+14 |
| cg09969043 | 0.02571543 | 0.18078154 | 0.04021632 | 0.81265419 |
| cg22125968 | 0.02572142 | 6.78422494 | 1.26129553 | 36.4908199 |
| cg13233166 | 0.02572384 | 35.2497841 | 1.54015945 | 806.76535  |
| cg13951491 | 0.02574513 | 6.59862122 | 1.25672662 | 34.6469958 |
| cg01240734 | 0.02574666 | 14726773.6 | 7.37966307 | 2.9389E+13 |
| cg16907919 | 0.02575183 | 4380543.75 | 6.36891377 | 3.0129E+12 |
| cg06435751 | 0.02575324 | 4920.05135 | 2.79860961 | 8649618.44 |
| cg03459809 | 0.02575357 | 5.06941074 | 1.21713665 | 21.1142482 |
| cg21686379 | 0.02575591 | 13.2049028 | 1.36664643 | 127.589298 |
| cg00692933 | 0.02575869 | 29591354.2 | 8.02052071 | 1.0918E+14 |
| cg07424616 | 0.02576227 | 792066946  | 11.9340812 | 5.257E+16  |
| cg01728712 | 0.02576228 | 231.370845 | 1.93237576 | 27702.9286 |
| cg26102728 | 0.0257634  | 14.8629474 | 1.38618755 | 159.363143 |
| cg06119923 | 0.02577045 | 468.20127  | 2.10379977 | 104198.333 |
| cg12130607 | 0.02578457 | 0.16149759 | 0.03251193 | 0.80221244 |
| cg03034880 | 0.02579308 | 11.7023732 | 1.34607895 | 101.736632 |
| cg00381622 | 0.02579552 | 36.0293139 | 1.54189593 | 841.893041 |
| cg18245365 | 0.02580169 | 1.8783E+13 | 40.0939673 | 8.80E+24   |
| cg19116023 | 0.02580288 | 6.3776757  | 1.2507595  | 32.5200386 |
| cg08519905 | 0.02581524 | 6.72705028 | 1.2586654  | 35.9533245 |
| cg04533380 | 0.02582001 | 176951360  | 9.89011659 | 3.166E+15  |
| cg23295999 | 0.02582564 | 12352.4602 | 3.11588958 | 48969409.8 |
| cg24014780 | 0.02582628 | 86329544.9 | 9.06352454 | 8.2228E+14 |



|            |            |            |            |            |
|------------|------------|------------|------------|------------|
| cg01734112 | 0.02582768 | 6.30116106 | 1.24859976 | 31.7993258 |
| cg05487736 | 0.02583238 | 536329.197 | 4.90799313 | 5.8608E+10 |
| cg17557230 | 0.02583418 | 3456.02455 | 2.67100136 | 4471770.73 |
| cg00612202 | 0.02583817 | 218828.957 | 4.40323912 | 1.0875E+10 |
| cg02219147 | 0.02584305 | 3905780.08 | 6.2297093  | 2.4488E+12 |
| cg03317618 | 0.0258438  | 89243.8796 | 3.9504646  | 2016084399 |
| cg11926393 | 0.02584514 | 38969.1242 | 3.57471418 | 424815121  |
| cg23665824 | 0.02584958 | 6.52548659 | 1.253574   | 33.9684575 |
| cg09183102 | 0.0258515  | 37768.8848 | 3.5598478  | 400716193  |
| cg13094036 | 0.02585234 | 0.10579255 | 0.01467014 | 0.76291443 |
| cg07765912 | 0.02585534 | 12390.2621 | 3.11187352 | 49333172.9 |
| cg17493815 | 0.02585666 | 11.8678338 | 1.34710771 | 104.553985 |
| cg18527241 | 0.02585868 | 5.70722763 | 1.23338412 | 26.4090049 |
| cg17457701 | 0.02585945 | 0.06710954 | 0.00623529 | 0.72229033 |
| cg16391678 | 0.02586409 | 8.9870584  | 1.30261539 | 62.003888  |
| cg17724175 | 0.02586838 | 7.8459835  | 1.28142573 | 48.0398164 |
| cg08499107 | 0.02586993 | 281563.144 | 4.52839485 | 1.7507E+10 |
| cg08898253 | 0.02587017 | 35.505226  | 1.53674002 | 820.321623 |
| cg04240980 | 0.02588211 | 6.3599443  | 1.24925355 | 32.3784483 |
| cg26572233 | 0.02589041 | 0.07469913 | 0.0076227  | 0.73201846 |
| cg08843298 | 0.02589269 | 3.5233E+10 | 18.538466  | 6.6961E+19 |
| cg01445100 | 0.02590821 | 35.7813509 | 1.53693502 | 833.024854 |
| cg22394521 | 0.02591192 | 474036162  | 11.0183627 | 2.0394E+16 |
| cg12308275 | 0.02591328 | 49.1718679 | 1.5965819  | 1514.40561 |
| cg23440155 | 0.02591554 | 6.01762411 | 1.24052619 | 29.1906775 |
| cg07115761 | 0.02591666 | 10.0160025 | 1.31878155 | 76.07045   |
| cg16996661 | 0.02592792 | 60978293.4 | 8.59803133 | 4.3247E+14 |
| cg05990544 | 0.02593217 | 4.71539883 | 1.20453854 | 18.4593397 |
| cg16565692 | 0.02594467 | 8.23723368 | 1.28772749 | 52.691287  |
| cg20849121 | 0.02594826 | 5479981.2  | 6.42683171 | 4.6726E+12 |

|            |            |            |            |            |
|------------|------------|------------|------------|------------|
| cg00652657 | 0.02594903 | 10.0326951 | 1.31846309 | 76.3426532 |
| cg03430067 | 0.02595149 | 7.8541E+12 | 35.1486585 | 1.76E+24   |
| cg27470087 | 0.02595175 | 11.2579853 | 1.33675294 | 94.8135056 |
| cg03352866 | 0.02595325 | 6798.56642 | 2.88007337 | 16048377.8 |
| cg19241779 | 0.02595944 | 11773.1476 | 3.07497418 | 45075827.3 |
| cg11475454 | 0.02596188 | 12.3150626 | 1.35100942 | 112.257373 |
| cg14277392 | 0.02596351 | 6.54443279 | 1.25242466 | 34.1973469 |
| cg02780181 | 0.02596809 | 1499377.19 | 5.49266957 | 4.093E+11  |
| cg12008118 | 0.02598035 | 29.4818361 | 1.49942441 | 579.674876 |
| cg16421621 | 0.02599126 | 385659.271 | 4.65994066 | 3.1917E+10 |
| cg26468205 | 0.02599304 | 221.864504 | 1.90845093 | 25792.5719 |
| cg27180443 | 0.02600087 | 0.09237221 | 0.01134476 | 0.75212044 |
| cg17928147 | 0.02600283 | 4.560335   | 1.19895497 | 17.3456518 |
| cg10143811 | 0.0260066  | 3.49707176 | 1.16145967 | 10.5294323 |
| cg18312782 | 0.0260112  | 30.0263274 | 1.50178163 | 600.340503 |
| cg12595281 | 0.02601228 | 4.88604313 | 1.20877962 | 19.7500165 |
| cg27285056 | 0.02602477 | 10.1444642 | 1.31884744 | 78.0303706 |
| cg25989526 | 0.02602531 | 0.03816014 | 0.00215101 | 0.67698198 |
| cg09745243 | 0.02602531 | 3188.82924 | 2.62119495 | 3879387.89 |
| cg21943938 | 0.02602832 | 43.5846952 | 1.56958547 | 1210.2722  |
| cg26945941 | 0.026033   | 0.17741213 | 0.03869363 | 0.81344307 |
| cg02431562 | 0.02603361 | 8.70333406 | 1.29478268 | 58.5024998 |
| cg07397574 | 0.02603909 | 2.2237E+11 | 22.6180576 | 2.19E+21   |
| cg17283453 | 0.02604297 | 5.59261229 | 1.22806864 | 25.4687005 |
| cg21466150 | 0.02604618 | 11.3222166 | 1.33585544 | 95.9629201 |
| cg12477903 | 0.02607927 | 29.2007286 | 1.49475748 | 570.44876  |
| cg03471346 | 0.02608596 | 0.21010494 | 0.05315734 | 0.83044201 |
| cg26084319 | 0.02608646 | 2252400.1  | 5.70839845 | 8.8874E+11 |
| cg02077165 | 0.02609672 | 73815.4462 | 3.79696068 | 1435021469 |
| cg02291472 | 0.02609719 | 4897734073 | 14.2342599 | 1.6852E+18 |

|            |            |            |            |            |
|------------|------------|------------|------------|------------|
| cg22488472 | 0.02610212 | 406.004685 | 2.04361953 | 80660.7109 |
| cg11181536 | 0.02611158 | 1.069E+15  | 61.3086884 | 1.86E+28   |
| cg24658737 | 0.02611416 | 0.06573505 | 0.0059729  | 0.72345015 |
| cg00487737 | 0.02611446 | 15.9602228 | 1.39016753 | 183.235982 |
| cg26464221 | 0.02612014 | 6.35883384 | 1.24598239 | 32.4521181 |
| cg05855588 | 0.02612284 | 4.53850762 | 1.19698473 | 17.2082826 |
| cg14993900 | 0.02612446 | 6.79290136 | 1.25574132 | 36.7460305 |
| cg12358524 | 0.02612508 | 5.32885604 | 1.22001979 | 23.2756115 |
| cg11845241 | 0.0261254  | 0.14570446 | 0.02669149 | 0.79537675 |
| cg27392850 | 0.02612582 | 3.92977182 | 1.17663903 | 13.1247614 |
| cg18843682 | 0.02613023 | 7.05217296 | 1.261261   | 39.4312861 |
| cg18009321 | 0.02614151 | 5.45495615 | 1.22321516 | 24.3265025 |
| cg11584101 | 0.02614696 | 0.17512031 | 0.03771479 | 0.81313256 |
| cg00131871 | 0.02615198 | 70.2839727 | 1.65661878 | 2981.87904 |
| cg17026456 | 0.02615353 | 1337020.69 | 5.3348114  | 3.3509E+11 |
| cg17593472 | 0.02615699 | 10.9541465 | 1.32851889 | 90.3211284 |
| cg04981611 | 0.0261608  | 5.13184933 | 1.21415153 | 21.6907666 |
| cg00839844 | 0.02616088 | 95.2932522 | 1.71716409 | 5288.25637 |
| cg23039189 | 0.02616665 | 7.53821177 | 1.27073892 | 44.7177906 |
| cg26058820 | 0.02616701 | 0.19058697 | 0.04421564 | 0.82150555 |
| cg26354439 | 0.02617164 | 0.01873555 | 0.00056256 | 0.62397152 |
| cg26174326 | 0.0261799  | 10.1370353 | 1.31594175 | 78.0881714 |
| cg26043149 | 0.02618016 | 1763.44784 | 2.42552647 | 1282092.08 |
| cg07470489 | 0.02619116 | 14.3059726 | 1.37054673 | 149.32789  |
| cg24137987 | 0.02619203 | 5878915.09 | 6.3375617  | 5.4535E+12 |
| cg17278453 | 0.02619239 | 10.0707529 | 1.31469571 | 77.1433747 |
| cg15141467 | 0.02619424 | 7.2440383  | 1.26434655 | 41.5045155 |
| cg22723056 | 0.02620318 | 4.4140668  | 1.19219778 | 16.3429139 |
| cg16556936 | 0.02620376 | 10116779.5 | 6.75097184 | 1.5161E+13 |
| cg05912499 | 0.02620714 | 45.028905  | 1.56939856 | 1291.96136 |

|            |            |            |            |            |
|------------|------------|------------|------------|------------|
| cg04234631 | 0.02621319 | 0.01107846 | 0.00020911 | 0.58692612 |
| cg04580334 | 0.02622335 | 2.5628E+10 | 17.0273682 | 3.8574E+19 |
| cg17284325 | 0.02622822 | 3.3553E+13 | 39.7596011 | 2.83E+25   |
| cg18395988 | 0.02623006 | 1.4951E+12 | 27.51346   | 8.12E+22   |
| cg26537098 | 0.02623144 | 5.17883666 | 1.21463468 | 22.0810006 |
| cg09061824 | 0.02623235 | 7923782.94 | 6.54098696 | 9.5989E+12 |
| cg02628508 | 0.02623303 | 5.98E-13   | 9.95E-24   | 0.03588304 |
| cg08991927 | 0.0262342  | 5.53105026 | 1.22408672 | 24.9921157 |
| cg13430464 | 0.02623548 | 9.75110044 | 1.30892597 | 72.6427329 |
| cg02618319 | 0.0262378  | 6.18580165 | 1.24033615 | 30.8498161 |
| cg17327665 | 0.02623893 | 688376.426 | 4.89739787 | 9.6758E+10 |
| cg20706597 | 0.02624287 | 0.00369455 | 2.65E-05   | 0.51590469 |
| cg21758133 | 0.02624354 | 10993.8494 | 3.00267993 | 40252283.7 |
| cg04478795 | 0.02624437 | 7.13980296 | 1.2614465  | 40.411374  |
| cg16676472 | 0.02624476 | 6.15E-07   | 2.05E-12   | 0.18454645 |
| cg10118828 | 0.02624632 | 23.1652391 | 1.44960316 | 370.189797 |
| cg14223995 | 0.0262473  | 6.36636343 | 1.24443258 | 32.5695292 |
| cg03893307 | 0.02624739 | 1.8946E+12 | 28.2133204 | 1.27E+23   |
| cg08916340 | 0.02624862 | 753.356316 | 2.18708321 | 259498.923 |
| cg00222341 | 0.02624881 | 10.2984833 | 1.31716336 | 80.52058   |
| cg19196335 | 0.02625063 | 10.867204  | 1.32551988 | 89.0941919 |
| cg19818312 | 0.02625272 | 3863.85484 | 2.65249611 | 5628424.54 |
| cg10976626 | 0.0262531  | 0.24564106 | 0.07122144 | 0.84721022 |
| cg00181849 | 0.02625518 | 0.15736722 | 0.03080829 | 0.80382406 |
| cg13447539 | 0.02626145 | 56.7667681 | 1.61095014 | 2000.35115 |
| cg08932052 | 0.02626215 | 460798.491 | 4.66219558 | 4.5544E+10 |
| cg04220455 | 0.02626587 | 41.7227339 | 1.55329278 | 1120.70728 |
| cg22622477 | 0.02627322 | 8.54385458 | 1.28802204 | 56.6740697 |
| cg22439359 | 0.02627727 | 249.544046 | 1.91767823 | 32472.7214 |
| cg27298551 | 0.0262773  | 0.00996546 | 0.00017104 | 0.58062556 |

|            |            |            |            |            |
|------------|------------|------------|------------|------------|
| cg14301212 | 0.02628176 | 11.2664227 | 1.33059098 | 95.395417  |
| cg15983200 | 0.02628392 | 12900.1733 | 3.05308982 | 54506902.9 |
| cg15659713 | 0.02628584 | 3.72422953 | 1.16770376 | 11.8779147 |
| cg10978585 | 0.02628762 | 0.18463953 | 0.04160559 | 0.8194033  |
| cg10314411 | 0.02628951 | 0.06137207 | 0.00523395 | 0.71963451 |
| cg12568595 | 0.02629314 | 1547.04545 | 2.37655296 | 1007067.66 |
| cg02414175 | 0.02629615 | 222.603493 | 1.89087413 | 26206.0358 |
| cg10815165 | 0.02630079 | 21.8077764 | 1.43787889 | 330.750465 |
| cg22209752 | 0.02630304 | 1050960514 | 11.557178  | 9.557E+16  |
| cg06212224 | 0.02630465 | 7.77900391 | 1.2733658  | 47.5220095 |
| cg04498679 | 0.02630661 | 6.26033315 | 1.24117243 | 31.5764114 |
| cg16048771 | 0.02631127 | 0.06012901 | 0.0050344  | 0.71815852 |
| cg21551132 | 0.02631412 | 8.8758E+11 | 25.5191512 | 3.09E+22   |
| cg07633851 | 0.0263209  | 9.04329341 | 1.29588532 | 63.1083279 |
| cg19484164 | 0.02632159 | 27352.0352 | 3.32849549 | 224766365  |
| cg08203284 | 0.02632698 | 9.67343966 | 1.30609532 | 71.6451802 |
| cg07701716 | 0.0263292  | 113.64428  | 1.7452303  | 7400.18229 |
| cg05508408 | 0.02633345 | 310225.323 | 4.42594213 | 2.1744E+10 |
| cg02560808 | 0.02633879 | 3824.11279 | 2.63823687 | 5543034.74 |
| cg10089865 | 0.0263508  | 24.7691598 | 1.4582397  | 420.720459 |
| cg05308135 | 0.02635393 | 0.1205561  | 0.01863593 | 0.77987928 |
| cg00372169 | 0.02635423 | 95353.5527 | 3.84707067 | 2363434623 |
| cg02184697 | 0.02635537 | 7.1719977  | 1.26049749 | 40.807341  |
| cg09427374 | 0.02635852 | 2661.66775 | 2.5258603  | 2804777.12 |
| cg00072369 | 0.02636409 | 6127840847 | 14.1109682 | 2.6611E+18 |
| cg26713775 | 0.02636633 | 19.634045  | 1.41857394 | 271.748772 |
| cg27071152 | 0.02637256 | 3.8126403  | 1.1701414  | 12.4226234 |
| cg02718725 | 0.02637423 | 47.4009176 | 1.57299735 | 1428.38574 |
| cg05569124 | 0.02637848 | 349705054  | 10.0639765 | 1.2152E+16 |
| cg26831488 | 0.02637887 | 5238.59248 | 2.73220741 | 10044205   |

|            |            |            |            |            |
|------------|------------|------------|------------|------------|
| cg16411949 | 0.02638349 | 566416.359 | 4.73231383 | 6.7795E+10 |
| cg26502485 | 0.026384   | 1465.08756 | 2.35219436 | 912544.304 |
| cg02549819 | 0.02638516 | 16.935807  | 1.39372202 | 205.795386 |
| cg27172150 | 0.0263877  | 16.0965595 | 1.38537836 | 187.024163 |
| cg24441975 | 0.02639091 | 25277.5829 | 3.28417158 | 194556278  |
| cg14572307 | 0.02639512 | 161.953187 | 1.81593085 | 14443.7411 |
| cg21653132 | 0.02640286 | 26.4196837 | 1.46787013 | 475.518696 |
| cg17367077 | 0.02640577 | 7.84765282 | 1.27312773 | 48.3735084 |
| cg14205016 | 0.02640887 | 10.9847259 | 1.3242545  | 91.1185907 |
| cg18934106 | 0.02641322 | 16.6654735 | 1.39044968 | 199.746897 |
| cg09747445 | 0.0264154  | 7.64238744 | 1.2690332  | 46.0240802 |
| cg21488617 | 0.02641848 | 13.100573  | 1.35167976 | 126.971653 |
| cg08066035 | 0.02641848 | 5.49082602 | 1.22078015 | 24.696642  |
| cg02384546 | 0.02642935 | 4.30983268 | 1.18652563 | 15.6546621 |
| cg25706502 | 0.02643118 | 0.14896615 | 0.02773155 | 0.80020469 |
| cg01319727 | 0.02643469 | 162865.291 | 4.07373376 | 6511250968 |
| cg14247055 | 0.02643522 | 253686.967 | 4.29044778 | 1.5E+10    |
| cg02435083 | 0.02643607 | 0.10402459 | 0.01410258 | 0.76731463 |
| cg18273421 | 0.02643761 | 13.9068195 | 1.36076756 | 142.125395 |
| cg02219997 | 0.026458   | 64.7070214 | 1.62819598 | 2571.55691 |
| cg02207219 | 0.02646744 | 12.3940145 | 1.34196121 | 114.467984 |
| cg20902958 | 0.02647161 | 61.5361579 | 1.61812914 | 2340.1709  |
| cg08948823 | 0.02647269 | 36174.3158 | 3.40801447 | 383971703  |
| cg22434674 | 0.02647911 | 538.995002 | 2.08446431 | 139371.834 |
| cg12656692 | 0.02648358 | 1083107.88 | 5.06490644 | 2.3162E+11 |
| cg06286401 | 0.02648382 | 83211.5876 | 3.75356216 | 1844692596 |
| cg08790004 | 0.02648465 | 709.145184 | 2.15187271 | 233697.323 |
| cg16071118 | 0.02648619 | 61.6801945 | 1.61800215 | 2351.32346 |
| cg25643782 | 0.02648724 | 9109.74159 | 2.89869657 | 28629209.6 |
| cg03151810 | 0.02650093 | 0.30107446 | 0.10427057 | 0.86933285 |

|            |            |            |            |            |
|------------|------------|------------|------------|------------|
| cg00079563 | 0.02650248 | 61.6595919 | 1.61730384 | 2350.76748 |
| cg16327839 | 0.02650277 | 0.22847456 | 0.06201002 | 0.84180948 |
| cg08132177 | 0.02651594 | 578151.804 | 4.69515656 | 7.1192E+10 |
| cg01133446 | 0.02652252 | 9.2313479  | 1.29562289 | 65.7736019 |
| cg08230658 | 0.02652944 | 36.9992166 | 1.52290199 | 898.903566 |
| cg24495257 | 0.02653836 | 262610403  | 9.55630118 | 7.2166E+15 |
| cg24844545 | 0.0265501  | 12.1719266 | 1.33751207 | 110.769691 |
| cg24956391 | 0.02655075 | 0.27605113 | 0.08851689 | 0.86090045 |
| cg24389730 | 0.02655083 | 3.95814582 | 1.17361191 | 13.3493178 |
| cg16509443 | 0.02655515 | 27115.4689 | 3.27899052 | 224230186  |
| cg15038123 | 0.02656112 | 631.010505 | 2.11663364 | 188116.758 |
| cg11201447 | 0.02656257 | 6.07898691 | 1.23354025 | 29.9577432 |
| cg25129124 | 0.02656329 | 5.56988236 | 1.22104821 | 25.407342  |
| cg03502630 | 0.02657093 | 8.82045309 | 1.28797343 | 60.4052775 |
| cg03317402 | 0.02659368 | 1908.63832 | 2.40395231 | 1515379.58 |
| cg03939371 | 0.0265937  | 2813.76834 | 2.51476611 | 3148321.52 |
| cg18207091 | 0.02660338 | 1552807.05 | 5.2300067  | 4.6103E+11 |
| cg14460968 | 0.02660468 | 1958547.32 | 5.37222945 | 7.1403E+11 |
| cg16520101 | 0.02660531 | 3.6711E+15 | 63.9994567 | 2.11E+29   |
| cg11274211 | 0.02660782 | 29879.1718 | 3.30572851 | 270066010  |
| cg04831490 | 0.02660794 | 5312.81134 | 2.70544389 | 10433025.2 |
| cg15831613 | 0.02660976 | 37.9299673 | 1.52471265 | 943.576104 |
| cg21786349 | 0.02661706 | 6677.07695 | 2.77684808 | 16055382   |
| cg12120360 | 0.02661958 | 0.1265822  | 0.02036261 | 0.78688615 |
| cg19847514 | 0.02662508 | 106741610  | 8.52513561 | 1.3365E+15 |
| cg22469141 | 0.02662765 | 15287512   | 6.80379386 | 3.435E+13  |
| cg11052143 | 0.0266359  | 4.75562243 | 1.19801961 | 18.8777751 |
| cg21492378 | 0.02663633 | 0.02473561 | 0.00093928 | 0.65140042 |
| cg25513776 | 0.02663804 | 9.27339491 | 1.29436277 | 66.4387565 |
| cg01939117 | 0.02663876 | 4.85119575 | 1.200753   | 19.5994516 |

|             |            |            |            |            |
|-------------|------------|------------|------------|------------|
| cg18604823  | 0.02663909 | 6.48595257 | 1.24183353 | 33.8753786 |
| cg26392737  | 0.02664189 | 0.10578574 | 0.01451623 | 0.77090414 |
| cg14117138  | 0.02664974 | 5.35660472 | 1.21448787 | 23.6257725 |
| cg19459207  | 0.02664976 | 9.28551802 | 1.29436147 | 66.612648  |
| cg17809945  | 0.02665106 | 5.06770397 | 1.20670161 | 21.2824971 |
| cg18015985  | 0.02665647 | 18298.1615 | 3.11420941 | 107514515  |
| cg15574263  | 0.02666688 | 93.2414079 | 1.68985995 | 5144.78146 |
| cg26779912  | 0.02666721 | 1144570.94 | 5.02194449 | 2.6086E+11 |
| cg00924278  | 0.02667105 | 743.108329 | 2.14814143 | 257064.075 |
| cg08222513  | 0.02667532 | 0.27234245 | 0.0862086  | 0.86035978 |
| cg24830559  | 0.02667668 | 1581.17646 | 2.34361119 | 1066780.62 |
| cg22125112  | 0.02667862 | 5.50806261 | 1.21806491 | 24.9073373 |
| cg24847572  | 0.02668234 | 240878.792 | 4.18888789 | 1.3852E+10 |
| cg111131549 | 0.02668321 | 28.8479637 | 1.47493139 | 564.23303  |
| cg05950943  | 0.02669074 | 22.8850295 | 1.435781   | 364.766336 |
| cg01569295  | 0.02669185 | 4.38994272 | 1.18639204 | 16.2438692 |
| cg14996263  | 0.02669721 | 4.72353993 | 1.19641615 | 18.648887  |
| cg20159072  | 0.02670811 | 1921.80525 | 2.3937631  | 1542899.3  |
| cg14042912  | 0.02671249 | 162.54919  | 1.79964232 | 14681.9393 |
| cg06941335  | 0.02671376 | 6.33720544 | 1.23750522 | 32.452528  |
| cg06288570  | 0.02671466 | 34.8512692 | 1.50653562 | 806.227843 |
| cg07657064  | 0.02671747 | 7.91788008 | 1.2696648  | 49.3774616 |
| cg07648738  | 0.0267175  | 84399197.3 | 8.21497814 | 8.671E+14  |
| cg16576694  | 0.02671904 | 0.22120574 | 0.05823576 | 0.84023945 |
| cg13808674  | 0.02672053 | 9.81899392 | 1.30153347 | 74.0761908 |
| cg13678049  | 0.02672495 | 17.4303757 | 1.39052358 | 218.491798 |
| cg09371063  | 0.02672703 | 588.995876 | 2.086818   | 166241.686 |
| cg00938535  | 0.02672866 | 313.753107 | 1.94050415 | 50729.6067 |
| cg04051396  | 0.02672963 | 8.44549043 | 1.27895755 | 55.7690976 |
| cg05861454  | 0.02673161 | 7218.50133 | 2.78549496 | 18706464.1 |



|            |            |            |            |            |
|------------|------------|------------|------------|------------|
| cg00700007 | 0.02674373 | 3.19722996 | 1.14332021 | 8.94087177 |
| cg17684754 | 0.02674696 | 55.1989241 | 1.58744804 | 1919.38328 |
| cg00427553 | 0.02674832 | 0.00022207 | 1.30E-07   | 0.37938786 |
| cg07525751 | 0.02674859 | 0.16629117 | 0.03400164 | 0.81327707 |
| cg10934807 | 0.02675103 | 0.17428314 | 0.03714606 | 0.81770743 |
| cg07794237 | 0.02675387 | 525133.331 | 4.55869424 | 6.0492E+10 |
| cg17282836 | 0.02675402 | 10.9331057 | 1.31715801 | 90.7505392 |
| cg25303383 | 0.02675668 | 14.882048  | 1.36472123 | 162.286148 |
| cg13175159 | 0.02676218 | 11.3818251 | 1.3231214  | 97.9093394 |
| cg15444076 | 0.02676633 | 55.8384024 | 1.58883534 | 1962.39793 |
| cg26619624 | 0.02676713 | 42.2641721 | 1.53867993 | 1160.90437 |
| cg00498024 | 0.02677508 | 5.67955595 | 1.22119822 | 26.4145128 |
| cg25471923 | 0.02678947 | 6.64852705 | 1.24333511 | 35.5518889 |
| cg03787837 | 0.02679018 | 4.83417356 | 1.1985971  | 19.4971555 |
| cg06208294 | 0.02679171 | 694169.562 | 4.69367804 | 1.0266E+11 |
| cg00444390 | 0.02679525 | 0.19375475 | 0.04533409 | 0.82809442 |
| cg12066473 | 0.02680523 | 11.0256956 | 1.31749559 | 92.2704896 |
| cg06096184 | 0.02680958 | 6.19173754 | 1.23293887 | 31.0944968 |
| cg01447579 | 0.02681018 | 231.896631 | 1.86918147 | 28769.8376 |
| cg05666074 | 0.02681166 | 4827197281 | 12.9442799 | 1.8002E+18 |
| cg26333638 | 0.02681452 | 2915.48433 | 2.49937111 | 3400875.06 |
| cg16855845 | 0.02681571 | 104.010317 | 1.70448871 | 6346.85696 |
| cg17121747 | 0.02682626 | 3.15674921 | 1.14101271 | 8.7335272  |
| cg20001850 | 0.02682717 | 3395323077 | 12.4070818 | 9.2916E+17 |
| cg08473764 | 0.02682987 | 4.71147864 | 1.19463246 | 18.5814732 |
| cg14353516 | 0.02683828 | 6433.91249 | 2.73386428 | 15141655.1 |
| cg27109600 | 0.02684064 | 6.4811933  | 1.23900758 | 33.9028328 |
| cg04913657 | 0.02684381 | 800687842  | 10.4908941 | 6.111E+16  |
| cg05863499 | 0.0268477  | 61.9906305 | 1.60492876 | 2394.39803 |
| cg01024069 | 0.02685919 | 6187.13462 | 2.71874371 | 14080266.1 |

|            |            |            |            |            |
|------------|------------|------------|------------|------------|
| cg09526758 | 0.02685977 | 5.25509671 | 1.20934499 | 22.8355363 |
| cg06449094 | 0.02687255 | 0.00488518 | 4.39E-05   | 0.54376121 |
| cg27101112 | 0.02687385 | 723.921704 | 2.12507548 | 246608.951 |
| cg11146971 | 0.02687918 | 4.52346167 | 1.18854956 | 17.215694  |
| cg22857553 | 0.02688229 | 1181888.49 | 4.95317979 | 2.8201E+11 |
| cg08288330 | 0.02689581 | 32336.5334 | 3.27860841 | 318931468  |
| cg05155784 | 0.02690183 | 9.42622125 | 1.29235785 | 68.7531301 |
| cg14862722 | 0.02690669 | 0.17163729 | 0.03603281 | 0.81757035 |
| cg21907914 | 0.02691172 | 6.43320346 | 1.23700125 | 33.4568026 |
| cg05423529 | 0.02691673 | 7.89894605 | 1.26627861 | 49.2730022 |
| cg25582283 | 0.02691882 | 15.2226193 | 1.36477594 | 169.792075 |
| cg26384310 | 0.02691886 | 7434555697 | 13.4113011 | 4.1213E+18 |
| cg17550268 | 0.02691965 | 6145124743 | 13.1213304 | 2.878E+18  |
| cg10112854 | 0.02692545 | 7.75664694 | 1.26352088 | 47.6173942 |
| cg22868409 | 0.02692983 | 22213.8169 | 3.13461433 | 157420853  |
| cg09677945 | 0.02693042 | 4.71569545 | 1.19367368 | 18.6297009 |
| cg26480413 | 0.02693085 | 2083.46283 | 2.39239476 | 1814423.54 |
| cg14042889 | 0.0269417  | 5.32120259 | 1.21011566 | 23.3987526 |
| cg07924644 | 0.02694512 | 0.02343523 | 0.00084271 | 0.65171652 |
| cg04141094 | 0.02694831 | 4119.11755 | 2.58378738 | 6566766.87 |
| cg04785418 | 0.02694843 | 6.2954E+10 | 17.0445617 | 2.33E+20   |
| cg22588640 | 0.02694888 | 48.0496715 | 1.55519833 | 1484.55081 |
| cg11099930 | 0.0269555  | 226643.732 | 4.07883524 | 1.2594E+10 |
| cg01506678 | 0.02695609 | 0.07216857 | 0.00702824 | 0.74105394 |
| cg03719155 | 0.02695663 | 10.0622454 | 1.30108519 | 77.8187185 |
| cg16260298 | 0.02696572 | 44.6267951 | 1.54157454 | 1291.89396 |
| cg21367838 | 0.02697954 | 7288.84849 | 2.75311519 | 19297162.9 |
| cg26660414 | 0.02698546 | 6.68485892 | 1.24142756 | 35.9967349 |
| cg08345979 | 0.02699993 | 916765.854 | 4.76641764 | 1.7633E+11 |
| cg06033764 | 0.02700383 | 0.10320597 | 0.01379037 | 0.77238465 |

|            |            |            |            |            |
|------------|------------|------------|------------|------------|
| cg11123303 | 0.02700402 | 10.4978868 | 1.30654276 | 84.3490391 |
| cg10729312 | 0.02700913 | 0.11710966 | 0.01750174 | 0.78361794 |
| cg20431441 | 0.02701078 | 20.3941201 | 1.40886906 | 295.215607 |
| cg17202331 | 0.02701641 | 114.933034 | 1.71464345 | 7703.99364 |
| cg10534923 | 0.02702195 | 82.4094524 | 1.65079565 | 4113.96641 |
| cg18827378 | 0.02703003 | 11930127.3 | 6.36381365 | 2.2365E+13 |
| cg18021286 | 0.02703714 | 8.49275098 | 1.27490189 | 56.5744076 |
| cg05529506 | 0.02703976 | 6.5379679  | 1.23756075 | 34.5397381 |
| cg10537421 | 0.02704488 | 9.25815717 | 1.28732495 | 66.5826251 |
| cg05740582 | 0.02705568 | 0.23310521 | 0.06409722 | 0.84774404 |
| cg20207890 | 0.02705592 | 50.2042112 | 1.5592064  | 1616.50364 |
| cg24237813 | 0.02707481 | 245.56089  | 1.86568611 | 32320.6302 |
| cg22007666 | 0.02707623 | 3.50540082 | 1.15271503 | 10.6599069 |
| cg07049592 | 0.02707764 | 9.54445393 | 1.29122969 | 70.5502682 |
| cg24698371 | 0.02707795 | 6926019.15 | 5.95660244 | 8.0532E+12 |
| cg21916898 | 0.02707864 | 0.02202176 | 0.00074721 | 0.64902085 |
| cg09010837 | 0.02707903 | 6473901.65 | 5.91063518 | 7.0908E+12 |
| cg15842430 | 0.02707998 | 0.04923133 | 0.00340904 | 0.71097073 |
| cg10248552 | 0.02708179 | 25.3705771 | 1.44235978 | 446.259105 |
| cg00244776 | 0.02709981 | 18.0600799 | 1.38746573 | 235.08075  |
| cg18728839 | 0.02710248 | 8.2452E+12 | 28.9413816 | 2.35E+24   |
| cg27522780 | 0.02710268 | 61.4572029 | 1.59361018 | 2370.08261 |
| cg01591227 | 0.02710444 | 310.27774  | 1.91391787 | 50301.1532 |
| cg21788473 | 0.02710471 | 13304.5599 | 2.92815448 | 60451494.5 |
| cg00003202 | 0.02710797 | 4.5691E+14 | 45.535799  | 4.58E+27   |
| cg07654982 | 0.02711189 | 13.1255588 | 1.3380078  | 128.758812 |
| cg18164983 | 0.02711717 | 180863.331 | 3.93046154 | 8322570775 |
| cg05748497 | 0.02712006 | 309.356523 | 1.91228347 | 50045.6442 |
| cg02954903 | 0.0271269  | 8.41809018 | 1.27221643 | 55.701405  |
| cg01587630 | 0.02714662 | 164.531914 | 1.7791479  | 15215.5708 |

|            |            |            |            |            |
|------------|------------|------------|------------|------------|
| cg24873171 | 0.02717912 | 8.99409445 | 1.28091889 | 63.1528941 |
| cg19068479 | 0.02718168 | 0.03135285 | 0.00145217 | 0.67691785 |
| cg07911673 | 0.0271859  | 58.3013346 | 1.58103856 | 2149.88154 |
| cg18923472 | 0.02718766 | 0.11934416 | 0.01809721 | 0.78702904 |
| cg18732172 | 0.02719043 | 5.09813012 | 1.20139792 | 21.6339069 |
| cg11357542 | 0.02719482 | 20.6806315 | 1.40656372 | 304.066226 |
| cg22973515 | 0.02719819 | 82.8091856 | 1.64428712 | 4170.41593 |
| cg05984388 | 0.02719989 | 2363.07734 | 2.39786083 | 2328798.41 |
| cg01317270 | 0.02720295 | 9668.23742 | 2.80960137 | 33269778.4 |
| cg08378932 | 0.02720376 | 6.26609177 | 1.22946747 | 31.9357015 |
| cg17822007 | 0.02720406 | 128.025358 | 1.7266819  | 9492.4793  |
| cg26812418 | 0.02720483 | 390.895846 | 1.95780495 | 78046.3663 |
| cg14462067 | 0.02722461 | 207.372143 | 1.82186118 | 23603.997  |
| cg08900316 | 0.0272251  | 0.23488079 | 0.06492927 | 0.84967823 |
| cg00930347 | 0.02722568 | 25256189.5 | 6.79735688 | 9.3842E+13 |
| cg12802310 | 0.02722916 | 102.642626 | 1.68313185 | 6259.46727 |
| cg24102622 | 0.02723051 | 6.26011514 | 1.22898735 | 31.8872621 |
| cg06116236 | 0.02723474 | 0.16504847 | 0.0333546  | 0.81670886 |
| cg21232956 | 0.02723813 | 58569.5775 | 3.43357102 | 999075130  |
| cg16584020 | 0.02724085 | 2931.19442 | 2.45210746 | 3503884.26 |
| cg15450139 | 0.02725154 | 4.1253695  | 1.17249855 | 14.514878  |
| cg27640988 | 0.02726359 | 34.0678472 | 1.48581752 | 781.131057 |
| cg26353176 | 0.02726654 | 6.241645   | 1.22811188 | 31.7219733 |
| cg10554436 | 0.02726737 | 7.90247816 | 1.26104573 | 49.5217259 |
| cg10012394 | 0.02727247 | 66.5612193 | 1.60145775 | 2766.47693 |
| cg02565308 | 0.02727525 | 2428231.82 | 5.20178413 | 1.1335E+12 |
| cg07921731 | 0.02728068 | 3.8241E+12 | 25.7525511 | 5.68E+23   |
| cg15014976 | 0.02728388 | 0.21240746 | 0.05367455 | 0.8405647  |
| cg01348004 | 0.02728558 | 8.83670852 | 1.27666331 | 61.1652399 |
| cg16756022 | 0.02729075 | 29.3660683 | 1.46048593 | 590.465099 |

|            |            |            |            |            |
|------------|------------|------------|------------|------------|
| cg13721644 | 0.02729942 | 21.5567561 | 1.41053656 | 329.444658 |
| cg05493583 | 0.02730284 | 0.17078846 | 0.03555329 | 0.82042185 |
| cg19230459 | 0.02731198 | 21631.0269 | 3.05696105 | 153060937  |
| cg22338443 | 0.0273144  | 9.41951611 | 1.28535756 | 69.0292621 |
| cg01883217 | 0.02732016 | 21.8750014 | 1.41233356 | 338.812088 |
| cg18676313 | 0.02732044 | 21148.3641 | 3.04776853 | 146747792  |
| cg02297043 | 0.02732866 | 9.34406594 | 1.2839654  | 68.0014963 |
| cg27223183 | 0.02733606 | 588072.697 | 4.41629851 | 7.8308E+10 |
| cg19718306 | 0.02734023 | 3.98100204 | 1.16699364 | 13.5805173 |
| cg02699635 | 0.027347   | 177.251159 | 1.78346566 | 17616.2479 |
| cg23378365 | 0.02734893 | 10.8557789 | 1.30531903 | 90.2828607 |
| cg12351660 | 0.02735164 | 8.60934155 | 1.27189604 | 58.2758022 |
| cg22777062 | 0.02735736 | 13.5966193 | 1.33839924 | 138.126242 |
| cg16601489 | 0.02735771 | 0.1677431  | 0.03434649 | 0.81923223 |
| cg15807973 | 0.02735839 | 4.8167E+11 | 20.1698843 | 1.15E+22   |
| cg08425070 | 0.02736563 | 10.3238168 | 1.29772038 | 82.1295519 |
| cg22076311 | 0.02737736 | 21.1495932 | 1.40560106 | 318.230616 |
| cg20908260 | 0.02738043 | 0.04303194 | 0.00263017 | 0.70404124 |
| cg11062635 | 0.0273854  | 35112099.6 | 6.94203399 | 1.7759E+14 |
| cg11104313 | 0.02738782 | 18.5804573 | 1.38519345 | 249.231176 |
| cg11010575 | 0.02739227 | 5.45675221 | 1.20824641 | 24.6440994 |
| cg03199124 | 0.02739292 | 63.5857105 | 1.58868168 | 2544.96708 |
| cg21151061 | 0.02739578 | 9.49367101 | 1.28513101 | 70.1327635 |
| cg13851767 | 0.0274003  | 7.83669371 | 1.25787985 | 48.8232388 |
| cg05774699 | 0.0274028  | 7.13804387 | 1.24482337 | 40.9308433 |
| cg13714586 | 0.02740523 | 3.7269E+12 | 25.1507849 | 5.52E+23   |
| cg21000493 | 0.02741477 | 1046773.69 | 4.68091898 | 2.3409E+11 |
| cg26847756 | 0.02741584 | 499.414803 | 1.99740589 | 124869.536 |
| cg25067702 | 0.0274165  | 7.04874044 | 1.24288707 | 39.9752663 |
| cg09760422 | 0.02741779 | 8.54952725 | 1.26986858 | 57.5606148 |

|            |            |            |            |            |
|------------|------------|------------|------------|------------|
| cg05159804 | 0.02743631 | 7.60295489 | 1.25311614 | 46.1289432 |
| cg00062312 | 0.02743884 | 2.08E-10   | 5.16E-19   | 0.08379184 |
| cg24683695 | 0.02744352 | 0.01999209 | 0.00061751 | 0.6472551  |
| cg03719380 | 0.02745103 | 47.5843842 | 1.53617905 | 1473.96465 |
| cg27102332 | 0.02745463 | 208381414  | 8.40287284 | 5.1676E+15 |
| cg08756266 | 0.02746132 | 16.3590258 | 1.36405349 | 196.192985 |
| cg10637512 | 0.02746522 | 6.88369376 | 1.2389433  | 38.2464959 |
| cg07960806 | 0.02746533 | 4.4260657  | 1.17963766 | 16.6068431 |
| cg05651995 | 0.02746581 | 39.4233349 | 1.50391956 | 1033.43249 |
| cg05072819 | 0.02747083 | 45265.3598 | 3.28802973 | 623155192  |
| cg15556748 | 0.02747631 | 164.407545 | 1.76184201 | 15341.8073 |
| cg00243313 | 0.02747662 | 5.1103912  | 1.19849725 | 21.7907034 |
| cg09850289 | 0.02747763 | 126126.006 | 3.6825601  | 4319758282 |
| cg07469949 | 0.02748198 | 3970325.41 | 5.39826111 | 2.9201E+12 |
| cg24425342 | 0.02748634 | 0.00529995 | 5.02E-05   | 0.55914642 |
| cg26423145 | 0.0274878  | 5.34076521 | 1.20424786 | 23.6859652 |
| cg14729962 | 0.02748942 | 5.97354318 | 1.21927936 | 29.2658263 |
| cg01726393 | 0.02749268 | 14.9474114 | 1.34979004 | 165.525823 |
| cg27131891 | 0.02749639 | 0.28287698 | 0.09204593 | 0.86934195 |
| cg08386886 | 0.02750317 | 3902.49111 | 2.50083285 | 6089746.01 |
| cg15324310 | 0.02750661 | 697786855  | 9.55242493 | 5.0972E+16 |
| cg17916916 | 0.02750784 | 5.39724621 | 1.20542024 | 24.1660673 |
| cg22140675 | 0.0275102  | 223467.654 | 3.91490743 | 1.2756E+10 |
| cg04710768 | 0.02751601 | 7.63757561 | 1.2525836  | 46.5697949 |
| cg00951770 | 0.0275162  | 13.1220485 | 1.3299706  | 129.467641 |
| cg09026415 | 0.02754084 | 76547.5161 | 3.46982042 | 1688710513 |
| cg10481660 | 0.02754226 | 3.68575266 | 1.15523381 | 11.7593275 |
| cg14676702 | 0.02757063 | 18.2353707 | 1.3780944  | 241.296057 |
| cg14254668 | 0.02757316 | 1741.65853 | 2.28005638 | 1330394.48 |
| cg18032014 | 0.0275819  | 4.85677939 | 1.19060804 | 19.8119827 |

|            |            |            |            |            |
|------------|------------|------------|------------|------------|
| cg27274426 | 0.02758295 | 0.19199066 | 0.04422599 | 0.83345594 |
| cg26233374 | 0.02758297 | 15.1221223 | 1.3496311  | 169.437842 |
| cg09769410 | 0.0275839  | 188610026  | 8.19367722 | 4.3416E+15 |
| cg12195820 | 0.02758456 | 11829.3086 | 2.81558521 | 49699274   |
| cg09466397 | 0.02758795 | 59.0300823 | 1.56839203 | 2221.73446 |
| cg06566039 | 0.02758894 | 4.54E-09   | 1.72E-16   | 0.12003945 |
| cg09493652 | 0.02759429 | 3074.91875 | 2.42542935 | 3898330.55 |
| cg10507121 | 0.02759483 | 1638697.86 | 4.84823496 | 5.5388E+11 |
| cg12129344 | 0.0275955  | 19.1422955 | 1.38491988 | 264.583879 |
| cg11809091 | 0.02759761 | 7.68657995 | 1.25227581 | 47.1809093 |
| cg03243768 | 0.02760247 | 10.0841029 | 1.29026025 | 78.8128833 |
| cg04492263 | 0.02760703 | 6.9112481  | 1.23754557 | 38.5968416 |
| cg22658758 | 0.02760748 | 10.1140239 | 1.29059625 | 79.2606352 |
| cg20986280 | 0.02761097 | 82.6452601 | 1.62678522 | 4198.61142 |
| cg23737575 | 0.02761327 | 0.16908236 | 0.03477533 | 0.82210129 |
| cg10674754 | 0.02762044 | 1384064.26 | 4.74888357 | 4.0339E+11 |
| cg15370732 | 0.02763152 | 82.3246683 | 1.62524461 | 4170.04982 |
| cg12976581 | 0.0276348  | 8.85759045 | 1.27142571 | 61.7078196 |
| cg24949907 | 0.02763755 | 0.17826429 | 0.03842095 | 0.82710504 |
| cg17432857 | 0.02763962 | 5.18936588 | 1.19869294 | 22.4657352 |
| cg24837744 | 0.02764058 | 6765443    | 5.64584019 | 8.1071E+12 |
| cg09313258 | 0.02764172 | 132.851368 | 1.71269286 | 10305.1087 |
| cg13949137 | 0.02764557 | 9.7866629  | 1.28528359 | 74.5195622 |
| cg25379116 | 0.02765685 | 8658.10121 | 2.71005437 | 27660964.1 |
| cg09172260 | 0.02765717 | 11.8465545 | 1.31236729 | 106.937178 |
| cg22361075 | 0.02766166 | 6396.01513 | 2.62066458 | 15610166.2 |
| cg11540692 | 0.02766338 | 9.10326804 | 1.27480026 | 65.0058612 |
| cg18962747 | 0.02767381 | 70119.2102 | 3.40722946 | 1443020992 |
| cg20893898 | 0.02767583 | 0.07150582 | 0.00683189 | 0.74841459 |
| cg17363387 | 0.02767787 | 0.09710882 | 0.0121832  | 0.77402654 |

|            |            |            |            |            |
|------------|------------|------------|------------|------------|
| cg24400608 | 0.02768276 | 853.510443 | 2.09843472 | 347154.033 |
| cg24630566 | 0.02770826 | 802.114805 | 2.08213912 | 309003.445 |
| cg07982208 | 0.02771111 | 221.559148 | 1.80797984 | 27150.9976 |
| cg13975172 | 0.02771159 | 231.799384 | 1.81693175 | 29572.3571 |
| cg24687970 | 0.02771182 | 4.98757693 | 1.1926099  | 20.858391  |
| cg02735652 | 0.02771827 | 70.360738  | 1.59401514 | 3105.76313 |
| cg19402405 | 0.02772051 | 76741047.2 | 7.31483676 | 8.051E+14  |
| cg00601350 | 0.02772573 | 5.20826263 | 1.19819824 | 22.6389913 |
| cg18501647 | 0.02773033 | 20.3296067 | 1.39090821 | 297.138879 |
| cg05639912 | 0.02773165 | 5.30758447 | 1.2006131  | 23.4633896 |
| cg23120805 | 0.02773523 | 1.3337E+16 | 58.3392405 | 3.05E+30   |
| cg02631680 | 0.02774401 | 22502.5408 | 2.99518088 | 169059688  |
| cg02311432 | 0.02774566 | 15.313275  | 1.34807467 | 173.949111 |
| cg08366813 | 0.02774915 | 618.901879 | 2.02072304 | 189555.683 |
| cg11516606 | 0.02775379 | 14779.7592 | 2.85894325 | 76406302.3 |
| cg08596000 | 0.02775741 | 118.390388 | 1.68577545 | 8314.44304 |
| cg05481243 | 0.02775772 | 138.974523 | 1.71558252 | 11257.9359 |
| cg07722220 | 0.02776071 | 84.4169689 | 1.62440957 | 4386.96298 |
| cg00966077 | 0.02777741 | 12533.4202 | 2.80426584 | 56017021.9 |
| cg15768282 | 0.0277846  | 59851804.4 | 7.07172793 | 5.0656E+14 |
| cg01157467 | 0.02778491 | 146.958247 | 1.72475965 | 12521.5861 |
| cg00567190 | 0.02778623 | 23.5439883 | 1.41202996 | 392.569139 |
| cg26929355 | 0.02778696 | 29.216205  | 1.44569607 | 590.432978 |
| cg16490176 | 0.02778871 | 36.3752738 | 1.48066678 | 893.624796 |
| cg14066993 | 0.02779038 | 28.9891178 | 1.44436952 | 581.824069 |
| cg10600917 | 0.02779324 | 107.458784 | 1.66640903 | 6929.50537 |
| cg12397426 | 0.02780126 | 6.46503657 | 1.22592882 | 34.0939026 |
| cg15102606 | 0.02780294 | 1030097238 | 9.62884797 | 1.102E+17  |
| cg06376277 | 0.0278174  | 0.03057482 | 0.0013674  | 0.68364872 |
| cg13202410 | 0.02782112 | 7.86901256 | 1.25221434 | 49.4494886 |



|            |            |            |            |            |
|------------|------------|------------|------------|------------|
| cg01208515 | 0.02782131 | 119.464876 | 1.68450074 | 8472.45497 |
| cg06424168 | 0.0278279  | 7.67598863 | 1.24872986 | 47.1845858 |
| cg10860308 | 0.02783353 | 0.12495777 | 0.01958569 | 0.79723727 |
| cg04066177 | 0.02784256 | 6.31302374 | 1.22221862 | 32.6081341 |
| cg05805038 | 0.0278461  | 72.0447764 | 1.59317102 | 3257.93637 |
| cg01375976 | 0.02785188 | 16.5376532 | 1.35716193 | 201.519044 |
| cg02182440 | 0.02785219 | 5.73026481 | 1.20927879 | 27.1533206 |
| cg26343133 | 0.02785268 | 4.36758817 | 1.17405323 | 16.2478379 |
| cg11585745 | 0.02786535 | 30.068245  | 1.44803624 | 624.36238  |
| cg00594003 | 0.02787095 | 2570.89385 | 2.34865369 | 2814163.37 |
| cg20246548 | 0.02787503 | 12499.2263 | 2.78873709 | 56022010.1 |
| cg10305299 | 0.02788776 | 0.21725089 | 0.0557134  | 0.84715617 |
| cg13118072 | 0.02788797 | 376084413  | 8.54398795 | 1.6554E+16 |
| cg17390562 | 0.0278898  | 3480.1132  | 2.42515246 | 4993990.29 |
| cg05927190 | 0.02789277 | 3.90559559 | 1.15949156 | 13.1554877 |
| cg13665981 | 0.02789834 | 6.62989187 | 1.2280157  | 35.793896  |
| cg17081801 | 0.02790013 | 20398807.3 | 6.21791485 | 6.6921E+13 |
| cg25363886 | 0.02790222 | 32022737.9 | 6.52859929 | 1.5707E+14 |
| cg06391932 | 0.02790376 | 9.74751148 | 1.28041061 | 74.2058676 |
| cg12441126 | 0.02790655 | 3.49039446 | 1.14531004 | 10.6371664 |
| cg08554302 | 0.0279098  | 84423.9629 | 3.42469999 | 2081176613 |
| cg07195622 | 0.02791419 | 2117047.74 | 4.85638565 | 9.2289E+11 |
| cg14867604 | 0.027915   | 91.0762299 | 1.63146418 | 5084.31614 |
| cg26497348 | 0.02791811 | 6.07472564 | 1.2161625  | 30.3432244 |
| cg08963608 | 0.02791899 | 149480224  | 7.703386   | 2.9006E+15 |
| cg06528626 | 0.02792329 | 5.1717301  | 1.19505877 | 22.3811522 |
| cg24166172 | 0.02793507 | 531317.434 | 4.17343873 | 6.7642E+10 |
| cg16621987 | 0.02793676 | 251.434889 | 1.82023192 | 34731.5651 |
| cg00794552 | 0.02793778 | 2138758.46 | 4.85225167 | 9.4271E+11 |
| cg19292008 | 0.02793849 | 5.94866553 | 1.21314815 | 29.16925   |

|            |            |            |            |            |
|------------|------------|------------|------------|------------|
| cg22876908 | 0.02794224 | 25.8893826 | 1.42262863 | 471.142023 |
| cg10002977 | 0.02795827 | 13443.9994 | 2.79827548 | 64590181.5 |
| cg11984608 | 0.02796482 | 6.29689827 | 1.22031311 | 32.4924215 |
| cg00783905 | 0.02796595 | 1968377.97 | 4.79763549 | 8.0759E+11 |
| cg01046376 | 0.02796737 | 0.02071938 | 0.00065299 | 0.65742209 |
| cg23231666 | 0.02797176 | 1.57E-06   | 1.04E-11   | 0.2355607  |
| cg25397562 | 0.02797387 | 3.41E-10   | 1.23E-18   | 0.09464497 |
| cg07167398 | 0.02797993 | 2.2143E+10 | 13.1382848 | 3.73E+19   |
| cg21210531 | 0.02798022 | 3.53667159 | 1.14634098 | 10.9112788 |
| cg11078326 | 0.02798472 | 0.15497247 | 0.02937905 | 0.81746923 |
| cg10705379 | 0.02798695 | 5.51559198 | 1.20268596 | 25.294845  |
| cg03460527 | 0.02798752 | 68.3817638 | 1.57876221 | 2961.85555 |
| cg09070503 | 0.02798969 | 3.0084E+12 | 22.3089958 | 4.06E+23   |
| cg02486145 | 0.02799253 | 5.13720381 | 1.19342108 | 22.1136222 |
| cg21431125 | 0.02799435 | 12992981.9 | 5.86893273 | 2.8765E+13 |
| cg02644867 | 0.02799847 | 6.16934363 | 1.21718959 | 31.2694103 |
| cg08939008 | 0.02800747 | 19589.2576 | 2.90660305 | 132023192  |
| cg23975712 | 0.0280121  | 121580.012 | 3.53876004 | 4177084411 |
| cg16782084 | 0.02801361 | 6.8159167  | 1.23016109 | 37.7647453 |
| cg19109608 | 0.02801457 | 7.54998145 | 1.24380301 | 45.8289775 |
| cg12395726 | 0.02801482 | 1532.1991  | 2.20682578 | 1063805.8  |
| cg01652532 | 0.02801606 | 2613.12268 | 2.33757365 | 2921152.95 |
| cg22123255 | 0.02801661 | 3.4484E+12 | 22.5406601 | 5.28E+23   |
| cg15380914 | 0.02802324 | 9092164.46 | 5.63203704 | 1.4678E+13 |
| cg01289902 | 0.02804563 | 30206.9823 | 3.03893078 | 300257507  |
| cg07568203 | 0.02804987 | 0.14527091 | 0.02597828 | 0.81235706 |
| cg07307426 | 0.02805269 | 768.195267 | 2.04544118 | 288506.936 |
| cg17867333 | 0.02806529 | 0.23054053 | 0.06224233 | 0.85390339 |
| cg10361095 | 0.02806716 | 9.330578   | 1.2717059  | 68.4589774 |
| cg25401140 | 0.02807787 | 5.7319E+12 | 23.5689059 | 1.39E+24   |

|            |            |            |            |            |
|------------|------------|------------|------------|------------|
| cg24287239 | 0.02808235 | 5.6088999  | 1.20374246 | 26.1349575 |
| cg04802826 | 0.02808814 | 1148.53466 | 2.13296751 | 618449.115 |
| cg19698993 | 0.02808935 | 7.50856476 | 1.24200029 | 45.3933425 |
| cg13971154 | 0.02808949 | 3.03509396 | 1.12676346 | 8.17544738 |
| cg17327184 | 0.02809038 | 20.7341265 | 1.38527186 | 310.339086 |
| cg07093915 | 0.02809232 | 1518.35737 | 2.1975649  | 1049074.41 |
| cg18011163 | 0.02809339 | 7.24773345 | 1.23723255 | 42.4573698 |
| cg00255925 | 0.02809612 | 35158794.6 | 6.46997956 | 1.9106E+14 |
| cg20656621 | 0.02810372 | 18393197.3 | 6.03048824 | 5.61E+13   |
| cg18613421 | 0.02810815 | 11.1897065 | 1.29609032 | 96.60556   |
| cg14331899 | 0.02810942 | 6.67217705 | 1.22606704 | 36.3095532 |
| cg01573194 | 0.02811083 | 8.1109187  | 1.25202643 | 52.5444196 |
| cg10008501 | 0.02811824 | 6.09150315 | 1.2140277  | 30.5647151 |
| cg19979540 | 0.02811824 | 121396974  | 7.37428962 | 1.9985E+15 |
| cg19942640 | 0.02811846 | 8148233.58 | 5.51813194 | 1.2032E+13 |
| cg04067276 | 0.02811909 | 10.901757  | 1.29227494 | 91.9682823 |
| cg25316172 | 0.02811978 | 16.9063818 | 1.35457289 | 211.008022 |
| cg15169829 | 0.02812106 | 7.31742192 | 1.23811856 | 43.2467983 |
| cg16000989 | 0.02812627 | 0.01671756 | 0.00043349 | 0.64471062 |
| cg07595113 | 0.0281279  | 1.254E+11  | 15.5106499 | 1.01E+21   |
| cg19974445 | 0.02812834 | 1053124466 | 9.28779769 | 1.1941E+17 |
| cg19713083 | 0.02812889 | 313513.127 | 3.88695673 | 2.5287E+10 |
| cg09965384 | 0.02813243 | 5.11631009 | 1.19134893 | 21.9722604 |
| cg03019033 | 0.02813299 | 85.5526862 | 1.61151762 | 4541.8443  |
| cg14547335 | 0.02813366 | 0.16255904 | 0.03210994 | 0.82296756 |
| cg01398529 | 0.02813542 | 1898106.83 | 4.71273599 | 7.6448E+11 |
| cg06479604 | 0.02813562 | 5.04466818 | 1.18951356 | 21.3941882 |
| cg15647311 | 0.02813579 | 26.0454162 | 1.41845928 | 478.239819 |
| cg10207240 | 0.02813853 | 9.72654123 | 1.27623011 | 74.1289546 |
| cg22397447 | 0.02814343 | 7.20E-08   | 3.02E-14   | 0.17154023 |

|            |            |            |            |            |
|------------|------------|------------|------------|------------|
| cg26299549 | 0.02814388 | 3223335.2  | 4.98452547 | 2.0844E+12 |
| cg26394572 | 0.02814631 | 21146.6331 | 2.90778302 | 153787297  |
| cg02580197 | 0.02814873 | 5.8106283  | 1.20752419 | 27.9608487 |
| cg27665171 | 0.02815271 | 126767.478 | 3.52155597 | 4563321870 |
| cg03535361 | 0.02816571 | 4150031145 | 10.709407  | 1.6082E+18 |
| cg08781253 | 0.02816677 | 2122859.06 | 4.75729156 | 9.4729E+11 |
| cg18648378 | 0.0281682  | 55.730684  | 1.5378805  | 2019.60369 |
| cg09835085 | 0.028173   | 5.6616711  | 1.20388109 | 26.6259849 |
| cg07560446 | 0.02817349 | 0.16884806 | 0.03448791 | 0.82665679 |
| cg17778955 | 0.02817416 | 35.6551774 | 1.4659025  | 867.241631 |
| cg23994468 | 0.02817947 | 33.978754  | 1.45821215 | 791.761144 |
| cg14033806 | 0.02818668 | 17.8529812 | 1.36102701 | 234.182669 |
| cg22817638 | 0.02819219 | 9.38028322 | 1.27041389 | 69.2606669 |
| cg27365825 | 0.02819664 | 4.41826406 | 1.17211802 | 16.6545152 |
| cg11915525 | 0.02819669 | 13.5908366 | 1.32170047 | 139.752421 |
| cg01564135 | 0.02819733 | 4.90142418 | 1.18518529 | 20.2702136 |
| cg10771090 | 0.02819942 | 5.8394186  | 1.20755133 | 28.2379794 |
| cg08576623 | 0.02820529 | 7.95664694 | 1.24805991 | 50.7253138 |
| cg02517558 | 0.02820599 | 740739.625 | 4.23741502 | 1.2949E+11 |
| cg00667974 | 0.02820742 | 3801031366 | 10.5539745 | 1.3689E+18 |
| cg22356722 | 0.0282097  | 7.42889487 | 1.23887965 | 44.5470865 |
| cg03123289 | 0.02820973 | 10.9634864 | 1.29146776 | 93.0708736 |
| cg10442148 | 0.02821012 | 2274940.39 | 4.77545238 | 1.0837E+12 |
| cg06974034 | 0.02822656 | 5.50120055 | 1.19956118 | 25.2285652 |
| cg23921854 | 0.02823235 | 49831.6457 | 3.17079829 | 783144395  |
| cg26396492 | 0.02823244 | 9.94769016 | 1.27774655 | 77.4461411 |
| cg14638883 | 0.02825368 | 4.3638984  | 1.17001064 | 16.2764411 |
| cg14283447 | 0.02825543 | 7.13947996 | 1.23300441 | 41.3398148 |
| cg09432138 | 0.02826084 | 808345.773 | 4.25910181 | 1.5342E+11 |
| cg10976172 | 0.02826098 | 20.1686691 | 1.37715309 | 295.373997 |

|             |            |            |            |            |
|-------------|------------|------------|------------|------------|
| cg25446086  | 0.02826118 | 22.6721471 | 1.3944208  | 368.630655 |
| cg12387009  | 0.02826121 | 8.0832E+11 | 18.5546828 | 3.52E+22   |
| cg25037730  | 0.02827333 | 9.4800811  | 1.27053824 | 70.7353267 |
| cg09714181  | 0.02827485 | 2198.95543 | 2.26866864 | 2131384.41 |
| cg05341353  | 0.02828314 | 510.638714 | 1.94153528 | 134301.91  |
| cg02215430  | 0.02828428 | 4.73221225 | 1.17983954 | 18.9804053 |
| cg03718284  | 0.02828591 | 1315.07501 | 2.14688959 | 805547.849 |
| cg13188519  | 0.02828972 | 822.336324 | 2.04199568 | 331164.77  |
| cg12749531  | 0.02829322 | 2.1296E+11 | 16.021147  | 2.83E+21   |
| cg14323910  | 0.02829651 | 0.3646403  | 0.14801785 | 0.89828726 |
| cg19259199  | 0.02830432 | 143.16471  | 1.6948224  | 12093.3817 |
| cg12235877  | 0.0283074  | 25.4417767 | 1.41045201 | 458.919551 |
| cg10132588  | 0.02831835 | 7.67570274 | 1.24165485 | 47.4499115 |
| cg111103652 | 0.02832163 | 9750319.9  | 5.52223219 | 1.7216E+13 |
| cg25292098  | 0.02832918 | 89.2640475 | 1.61081387 | 4946.61135 |
| cg00042356  | 0.02833083 | 1.0993E+12 | 18.9642528 | 6.37E+22   |
| cg12073754  | 0.02833226 | 9637847.49 | 5.51010386 | 1.6858E+13 |
| cg07701282  | 0.02833462 | 110.956223 | 1.6482007  | 7469.5293  |
| cg06348477  | 0.02833556 | 1.31E-06   | 7.25E-12   | 0.23763294 |
| cg14719951  | 0.0283363  | 3.58463564 | 1.14505572 | 11.2218231 |
| cg04374102  | 0.02833965 | 10571.3074 | 2.67229222 | 41818981.6 |
| cg01302668  | 0.02834112 | 9.97235538 | 1.27627791 | 77.9202328 |
| cg08094235  | 0.02834195 | 4.30504467 | 1.16746746 | 15.8748832 |
| cg25387636  | 0.02834506 | 4.64310086 | 1.17683436 | 18.3189634 |
| cg00086730  | 0.02835232 | 19988.1504 | 2.85708206 | 139837131  |
| cg00138497  | 0.0283534  | 210.340948 | 1.76294096 | 25096.3108 |
| cg09547173  | 0.02835403 | 17.9129458 | 1.3577989  | 236.318962 |
| cg19578881  | 0.02835584 | 4512904323 | 10.5504704 | 1.9304E+18 |
| cg04195863  | 0.02835839 | 0.11331273 | 0.01617262 | 0.79392049 |
| cg13175480  | 0.02836484 | 47161.5054 | 3.12689826 | 711314347  |

|            |            |            |            |            |
|------------|------------|------------|------------|------------|
| cg04273871 | 0.02836618 | 11.5645259 | 1.29603987 | 103.189927 |
| cg03207666 | 0.02836743 | 10.7061414 | 1.28547289 | 89.1667689 |
| cg03586793 | 0.02836882 | 7.44831026 | 1.23698678 | 44.8487619 |
| cg16758662 | 0.02837567 | 7.37156988 | 1.23553514 | 43.980977  |
| cg16762077 | 0.02837867 | 11.4989412 | 1.29503597 | 102.101911 |
| cg18498156 | 0.0283787  | 28.8458772 | 1.42746353 | 582.911307 |
| cg01957900 | 0.02839838 | 0.0910316  | 0.01067699 | 0.77613155 |
| cg00588720 | 0.02840649 | 4718.26998 | 2.44529668 | 9104037.08 |
| cg12379940 | 0.0284201  | 5.00973618 | 1.18554783 | 21.1695015 |
| cg27117639 | 0.02842265 | 8.29E-10   | 6.25E-18   | 0.10986931 |
| cg08257866 | 0.02842742 | 56.038194  | 1.5297281  | 2052.83487 |
| cg25426743 | 0.02843719 | 5.29397942 | 1.19228706 | 23.506267  |
| cg22605924 | 0.02844487 | 11.9858916 | 1.29952748 | 110.549103 |
| cg03615240 | 0.02844545 | 221796.13  | 3.66361735 | 1.3428E+10 |
| cg08272268 | 0.02844648 | 7.16391475 | 1.23083349 | 41.6966836 |
| cg12018140 | 0.02846412 | 9.3430118  | 1.26551747 | 68.9772142 |
| cg19628619 | 0.02846773 | 4.73990501 | 1.17814202 | 19.069602  |
| cg21944443 | 0.02847014 | 20.3152364 | 1.37331922 | 300.519228 |
| cg13919420 | 0.02847316 | 111.227672 | 1.64256255 | 7531.88665 |
| cg15228639 | 0.02848011 | 9.42560841 | 1.26643558 | 70.1512935 |
| cg16047144 | 0.02848159 | 3.85793732 | 1.1527398  | 12.9115698 |
| cg00151788 | 0.02848409 | 1.0367E+12 | 18.4007095 | 5.84E+22   |
| cg24364518 | 0.02849306 | 8.1181E+10 | 14.0552315 | 4.69E+20   |
| cg13679837 | 0.02849501 | 1892085133 | 9.4617417  | 3.7836E+17 |
| cg19574915 | 0.02849895 | 26.1038063 | 1.40932603 | 483.499691 |
| cg25039393 | 0.0285095  | 58.2159169 | 1.5330111  | 2210.74263 |
| cg02077702 | 0.02852097 | 18.3237844 | 1.35734261 | 247.366488 |
| cg27598661 | 0.02852403 | 4.23E-13   | 3.56E-24   | 0.05014444 |
| cg20446334 | 0.02852963 | 3.25327774 | 1.13187451 | 9.35069744 |
| cg09667226 | 0.02853337 | 207882275  | 7.46911744 | 5.7858E+15 |

|            |            |            |            |            |
|------------|------------|------------|------------|------------|
| cg12934382 | 0.02853561 | 10.8255169 | 1.28407809 | 91.2653344 |
| cg02661886 | 0.0285433  | 619.78533  | 1.96333806 | 195653.445 |
| cg07882671 | 0.02855509 | 2.65917475 | 1.1080039  | 6.38193637 |
| cg15773539 | 0.02855611 | 24.7297715 | 1.39988604 | 436.865272 |
| cg07318128 | 0.02856162 | 23.8016754 | 1.39414507 | 406.356386 |
| cg23065793 | 0.0285619  | 2538.29266 | 2.27451263 | 2832663.82 |
| cg04332613 | 0.02856231 | 1.5709E+11 | 14.9154057 | 1.65E+21   |
| cg01960526 | 0.02856668 | 3748152.44 | 4.8858208  | 2.8754E+12 |
| cg24041453 | 0.02856737 | 19.8573541 | 1.36778369 | 288.287187 |
| cg21635948 | 0.02856798 | 62715.5333 | 3.18222446 | 1236002726 |
| cg12249789 | 0.02856925 | 6.34454513 | 1.21361271 | 33.1681208 |
| cg09556286 | 0.02857663 | 10.5701823 | 1.28016722 | 87.2766871 |
| cg22256433 | 0.02858797 | 4.67475997 | 1.17519696 | 18.5955049 |
| cg09841537 | 0.02858848 | 50813.6456 | 3.10892523 | 830520641  |
| cg26149645 | 0.0285989  | 125.66122  | 1.65812003 | 9523.28056 |
| cg08931196 | 0.02860384 | 103423.841 | 3.3456799  | 3197105306 |
| cg26228569 | 0.02860882 | 261330.972 | 3.68500334 | 1.8533E+10 |
| cg23769143 | 0.0286152  | 25.7605697 | 1.40437507 | 472.528293 |
| cg08331842 | 0.02861636 | 17.4431085 | 1.34826509 | 225.669297 |
| cg09740133 | 0.02861717 | 0.0101979  | 0.00016794 | 0.6192377  |
| cg00922748 | 0.02862221 | 3.87217778 | 1.15195123 | 13.0159683 |
| cg22645427 | 0.02862495 | 4.52523699 | 1.17083678 | 17.4898587 |
| cg18361024 | 0.02862542 | 251.943684 | 1.78181799 | 35624.0764 |
| cg11929911 | 0.02863066 | 503551843  | 8.10667587 | 3.1278E+16 |
| cg11876919 | 0.02863894 | 7680.46722 | 2.5445412  | 23182794.8 |
| cg00484396 | 0.02864338 | 18.5219074 | 1.35614644 | 252.967557 |
| cg12030690 | 0.02864594 | 6.51503641 | 1.21600586 | 34.9058347 |
| cg08736918 | 0.02864757 | 2.21E-06   | 1.89E-11   | 0.25690973 |
| cg12691330 | 0.02864818 | 5.37116934 | 1.19172642 | 24.2081233 |
| cg09109520 | 0.02865717 | 8.5985548  | 1.25156162 | 59.0743144 |

|            |            |            |            |            |
|------------|------------|------------|------------|------------|
| cg09831010 | 0.02866455 | 1288.78277 | 2.10976925 | 787271.421 |
| cg16007090 | 0.028667   | 52183.5032 | 3.10267242 | 877668551  |
| cg06381123 | 0.0286723  | 109.774894 | 1.63167181 | 7385.38678 |
| cg25191743 | 0.0286761  | 2094771.07 | 4.55581148 | 9.6318E+11 |
| cg05148250 | 0.02867958 | 601236.881 | 3.99921942 | 9.0389E+10 |
| cg24656271 | 0.0286836  | 6.36950455 | 1.21266721 | 33.4556654 |
| cg15651127 | 0.02868373 | 47.3132795 | 1.494293   | 1498.06391 |
| cg18444267 | 0.02868493 | 14.1899581 | 1.31814022 | 152.756821 |
| cg04852989 | 0.02868891 | 135.269558 | 1.66680596 | 10977.7945 |
| cg19615059 | 0.02869041 | 16.7710893 | 1.3411646  | 209.720296 |
| cg06625838 | 0.02869235 | 346.852075 | 1.83828235 | 65444.9857 |
| cg04525491 | 0.02869307 | 37.1031936 | 1.45666256 | 945.069234 |
| cg06927343 | 0.02869684 | 0.00103132 | 2.18E-06   | 0.48886516 |
| cg01566404 | 0.02869998 | 19.0679982 | 1.35899056 | 267.543105 |
| cg06939307 | 0.02870437 | 6.58875685 | 1.21668105 | 35.6804414 |
| cg13577076 | 0.02870707 | 5.48187734 | 1.19359385 | 25.1768884 |
| cg17138785 | 0.02871338 | 317948463  | 7.65657905 | 1.3203E+16 |
| cg02012771 | 0.02871555 | 13131.896  | 2.68011861 | 64342933.5 |
| cg26454350 | 0.02871755 | 6647.26693 | 2.4967252  | 17697645.6 |
| cg18709306 | 0.02871996 | 22.4790016 | 1.38197884 | 365.639111 |
| cg24664672 | 0.0287201  | 793.424009 | 2.00155468 | 314516.343 |
| cg25382652 | 0.02872194 | 0.04743284 | 0.00308851 | 0.72846487 |
| cg05741182 | 0.02872306 | 119500372  | 6.90887775 | 2.067E+15  |
| cg25169875 | 0.02872404 | 412704.586 | 3.83311086 | 4.4435E+10 |
| cg24403578 | 0.02873115 | 34.7804715 | 1.44579563 | 836.688926 |
| cg12249809 | 0.02873141 | 25.6364422 | 1.40069544 | 469.214898 |
| cg11832404 | 0.02873269 | 4.20731354 | 1.16094969 | 15.2474198 |
| cg04660111 | 0.0287352  | 34.3293604 | 1.44372039 | 816.297252 |
| cg24108579 | 0.02873814 | 4.79128131 | 1.17667229 | 19.5095752 |
| cg06671340 | 0.02874233 | 548.878771 | 1.92483063 | 156516.579 |



|            |            |            |            |            |
|------------|------------|------------|------------|------------|
| cg06501716 | 0.02874692 | 24.3427875 | 1.3927947  | 425.454883 |
| cg02748089 | 0.02874979 | 3.66363179 | 1.14424124 | 11.7302169 |
| cg04784699 | 0.02875642 | 6.37878985 | 1.21193242 | 33.5736212 |
| cg26605335 | 0.0287578  | 7.33623473 | 1.22962303 | 43.7697885 |
| cg17334359 | 0.02876468 | 14.9016197 | 1.32327273 | 167.809904 |
| cg09002922 | 0.02877019 | 7.40113726 | 1.23057565 | 44.5131779 |
| cg22599959 | 0.02877727 | 25.0878227 | 1.39639308 | 450.731859 |
| cg23411036 | 0.02877772 | 49.2493387 | 1.49746472 | 1619.7359  |
| cg00909706 | 0.02877803 | 5.59294355 | 1.19526667 | 26.1707436 |
| cg24623196 | 0.02878223 | 147371.478 | 3.43075564 | 6330486540 |
| cg19483962 | 0.02879093 | 155488.369 | 3.44785064 | 7012088242 |
| cg01441114 | 0.02879259 | 270316127  | 7.46376274 | 9.7901E+15 |
| cg11698099 | 0.02879309 | 5.20585777 | 1.18625193 | 22.8458681 |
| cg17176470 | 0.02879618 | 9.51964716 | 1.26269254 | 71.7701887 |
| cg10553515 | 0.0288065  | 8405105.88 | 5.20430393 | 1.3574E+13 |
| cg06291428 | 0.02880887 | 0.20026543 | 0.04736455 | 0.84675645 |
| cg13719287 | 0.02881548 | 7.99377138 | 1.23978575 | 51.5414706 |
| cg01791407 | 0.02882036 | 3.23048422 | 1.12887415 | 9.24463394 |
| cg19137671 | 0.02882231 | 289491.738 | 3.66890977 | 2.2842E+10 |
| cg18189994 | 0.02882598 | 4.91480232 | 1.17886119 | 20.4903529 |
| cg18077580 | 0.02882702 | 5.5020275  | 1.19267993 | 25.3817524 |
| cg14663177 | 0.02883522 | 5.77582696 | 1.19858386 | 27.8329937 |
| cg13348059 | 0.02884703 | 4.18069516 | 1.15912082 | 15.0788526 |
| cg22968727 | 0.02885082 | 1113.55984 | 2.06269003 | 601164.253 |
| cg06288697 | 0.02885131 | 5.37933678 | 1.18963118 | 24.3245677 |
| cg09713758 | 0.0288617  | 0.12005346 | 0.01793518 | 0.80360681 |
| cg00356511 | 0.0288648  | 1.4212E+10 | 11.1430067 | 1.8126E+19 |
| cg03699778 | 0.02886493 | 2.1264E+10 | 11.6155483 | 3.89E+19   |
| cg12587087 | 0.02886542 | 9.41778663 | 1.26019003 | 70.3820081 |
| cg14753355 | 0.0288669  | 7.31300363 | 1.22772348 | 43.5603156 |

|            |            |            |            |            |
|------------|------------|------------|------------|------------|
| cg14155825 | 0.02886696 | 27182.7523 | 2.86574329 | 257839571  |
| cg22160883 | 0.02886756 | 37.6621701 | 1.45375904 | 975.704376 |
| cg22716904 | 0.02886959 | 9.3191E+13 | 27.5569442 | 3.15E+26   |
| cg07870237 | 0.02887393 | 6.63041657 | 1.21529079 | 36.1744073 |
| cg26738040 | 0.02887503 | 75.551795  | 1.56166607 | 3655.11797 |
| cg19306474 | 0.02887832 | 13338433.5 | 5.42305547 | 3.2807E+13 |
| cg09155362 | 0.02887874 | 28.3636318 | 1.41157547 | 569.927453 |
| cg16773162 | 0.02888587 | 8.60967928 | 1.24827738 | 59.3830976 |
| cg08715146 | 0.0288891  | 8.83746741 | 1.25159041 | 62.4012692 |
| cg03048947 | 0.02889934 | 5.97754134 | 1.20206924 | 29.7245778 |
| cg15718572 | 0.02890259 | 4.96428596 | 1.17927112 | 20.8977686 |
| cg07448499 | 0.02890337 | 1700.97846 | 2.1501624  | 1345632.18 |
| cg18557263 | 0.02890751 | 3215364.7  | 4.67205986 | 2.2129E+12 |
| cg02157015 | 0.02891027 | 9.07754813 | 1.25472217 | 65.6734075 |
| cg14161426 | 0.02891921 | 5.5471E+10 | 12.7268013 | 2.42E+20   |
| cg01501896 | 0.02891947 | 8.22854176 | 1.24197655 | 54.5170513 |
| cg20964423 | 0.02892325 | 9.82245224 | 1.26473333 | 76.2853051 |
| cg20786683 | 0.028925   | 2.09E+11   | 14.5742446 | 3.00E+21   |
| cg14825683 | 0.02892742 | 13.4202386 | 1.30588826 | 137.915937 |
| cg02286091 | 0.02893397 | 5.49696985 | 1.19134996 | 25.3633933 |
| cg08007986 | 0.02893838 | 16.7721915 | 1.33592665 | 210.570247 |
| cg24005667 | 0.02893931 | 0.18709078 | 0.04157875 | 0.84184728 |
| cg05678729 | 0.02894374 | 2254953.2  | 4.49124048 | 1.1322E+12 |
| cg06080402 | 0.02895787 | 13115747.6 | 5.37429721 | 3.2008E+13 |
| cg25160978 | 0.02897169 | 5.37542578 | 1.18819473 | 24.3185748 |
| cg10335067 | 0.02897234 | 87390.892  | 3.21084807 | 2378551658 |
| cg26450387 | 0.0289731  | 35.681447  | 1.44263449 | 882.528228 |
| cg05666120 | 0.02897474 | 4.46914295 | 1.16588303 | 17.1314258 |
| cg14033514 | 0.02897812 | 5.39200725 | 1.18849807 | 24.4625911 |
| cg23630954 | 0.02897972 | 0.07130886 | 0.00666531 | 0.76289863 |

|            |            |            |            |            |
|------------|------------|------------|------------|------------|
| cg07976603 | 0.02898567 | 668.541007 | 1.94730242 | 229521.143 |
| cg15699552 | 0.02899574 | 0.07075087 | 0.00656513 | 0.76246543 |
| cg23047804 | 0.02899644 | 116409.778 | 3.30144401 | 4104639170 |
| cg26455413 | 0.02899761 | 13134.4707 | 2.64031137 | 65338627.2 |
| cg09191574 | 0.02900808 | 12.7787404 | 1.29783866 | 125.821653 |
| cg12275410 | 0.0290128  | 6.44345022 | 1.20996064 | 34.3135549 |
| cg06986734 | 0.02903692 | 6.49479751 | 1.21063823 | 34.8431047 |
| cg11416076 | 0.02903779 | 7.24783979 | 1.22427098 | 42.9081326 |
| cg23039471 | 0.02903924 | 22.4284052 | 1.37399292 | 366.11059  |
| cg00388812 | 0.02904197 | 12.7323434 | 1.29673117 | 125.016327 |
| cg17817203 | 0.02904789 | 0.09376857 | 0.01119617 | 0.78531689 |
| cg09078754 | 0.02905333 | 6.66489419 | 1.21362908 | 36.6016401 |
| cg00334820 | 0.02905849 | 3.1676E+10 | 11.7902831 | 8.51E+19   |
| cg18492804 | 0.02906242 | 104.34361  | 1.60666637 | 6776.50883 |
| cg17405853 | 0.02909323 | 0.13909021 | 0.02365089 | 0.81798557 |
| cg23205003 | 0.02909384 | 3248199123 | 9.30504704 | 1.1339E+18 |
| cg16779976 | 0.02909786 | 7.55112772 | 1.22857574 | 46.4110822 |
| cg07880636 | 0.02909804 | 0.01125692 | 0.0002001  | 0.63327357 |
| cg10246448 | 0.02910097 | 16.2950685 | 1.32860032 | 199.856387 |
| cg08545493 | 0.02910309 | 0.14898937 | 0.02694501 | 0.82381976 |
| cg12628956 | 0.02911395 | 5330.89922 | 2.39408782 | 11870277.4 |
| cg02970696 | 0.02911408 | 3.49044551 | 1.13560875 | 10.7283515 |
| cg11176186 | 0.02911635 | 1026537.86 | 4.08768033 | 2.5779E+11 |
| cg25337570 | 0.02912122 | 1951.91177 | 2.1608087  | 1763210.02 |
| cg09189752 | 0.02912581 | 70.2725046 | 1.54084    | 3204.89143 |
| cg26789332 | 0.02912669 | 20.0623831 | 1.35644841 | 296.730207 |
| cg10936964 | 0.02913636 | 16.8186944 | 1.33214293 | 212.34094  |
| cg27303326 | 0.02914876 | 2.99E-06   | 3.25E-11   | 0.27483277 |
| cg21785847 | 0.02915397 | 32.0072651 | 1.42166788 | 720.607843 |
| cg16458494 | 0.02915521 | 4.11587509 | 1.15443631 | 14.6741987 |

|            |            |            |            |            |
|------------|------------|------------|------------|------------|
| cg19833103 | 0.0291652  | 32.0808328 | 1.42169061 | 723.912659 |
| cg04681368 | 0.02917109 | 126276.27  | 3.29116586 | 4844999335 |
| cg03691812 | 0.029175   | 27184.2715 | 2.81584785 | 262437694  |
| cg00486259 | 0.02917607 | 6.0934187  | 1.20108786 | 30.913435  |
| cg01958916 | 0.02917902 | 59.4816928 | 1.51310966 | 2338.2785  |
| cg21204804 | 0.02918999 | 5.87188744 | 1.19642241 | 28.818469  |
| cg26015971 | 0.02919224 | 5.11797912 | 1.17985751 | 22.2007403 |
| cg05301811 | 0.02920895 | 392.341336 | 1.8301601  | 84108.3378 |
| cg27477205 | 0.02921443 | 2252230.01 | 4.3925392  | 1.1548E+12 |
| cg06209740 | 0.02922527 | 4924.5306  | 2.36236229 | 10265572.6 |
| cg04315434 | 0.029229   | 1495207232 | 8.46237549 | 2.6419E+17 |
| cg07223632 | 0.0292291  | 170.020037 | 1.6806806  | 17199.4684 |
| cg15467112 | 0.02923547 | 14.0965558 | 1.30654729 | 152.090083 |
| cg15864491 | 0.02924476 | 202.339728 | 1.70971931 | 23946.2496 |
| cg22928599 | 0.02924587 | 26.2876269 | 1.39121005 | 496.718182 |
| cg16261871 | 0.02925342 | 7.5417601  | 1.22627114 | 46.3830091 |
| cg19518452 | 0.0292593  | 211842102  | 6.9229662  | 6.4823E+15 |
| cg24713667 | 0.02927347 | 34.1567325 | 1.42772084 | 817.16421  |
| cg22188945 | 0.0292773  | 1481352941 | 8.4065733  | 2.6103E+17 |
| cg22927302 | 0.02928482 | 12.9663594 | 1.29464826 | 129.862668 |
| cg01536987 | 0.02928516 | 7.3229404  | 1.2222018  | 43.8761062 |
| cg02461363 | 0.02928831 | 6.13008883 | 1.20045808 | 31.3030415 |
| cg05890484 | 0.02929555 | 6.72938332 | 1.21170085 | 37.3727556 |
| cg23939875 | 0.02929558 | 8.28760402 | 1.23738821 | 55.5075437 |
| cg03105222 | 0.02930101 | 6.0057339  | 1.19782993 | 30.1118204 |
| cg24458009 | 0.02930383 | 13.7499621 | 1.30196619 | 145.212264 |
| cg19896639 | 0.02930405 | 236.47655  | 1.73372741 | 32254.8739 |
| cg21378238 | 0.0293042  | 0.08092101 | 0.00843437 | 0.77637245 |
| cg18345226 | 0.02930489 | 29.6355387 | 1.40659036 | 624.392986 |
| cg21073212 | 0.02930622 | 17.1612031 | 1.33129111 | 221.219003 |

|            |            |            |            |            |
|------------|------------|------------|------------|------------|
| cg26818792 | 0.02930631 | 165843966  | 6.72068536 | 4.0925E+15 |
| cg19540943 | 0.0293099  | 2670290.33 | 4.43388051 | 1.6082E+12 |
| cg07529884 | 0.02932025 | 6.21676698 | 1.20176776 | 32.1594514 |
| cg09639151 | 0.02932069 | 6.1659417  | 1.20077046 | 31.6620356 |
| cg21212076 | 0.02932577 | 8.92688738 | 1.24622596 | 63.9445181 |
| cg23672425 | 0.02932738 | 0.01590417 | 0.00038358 | 0.65943287 |
| cg03442712 | 0.02932763 | 15.4177197 | 1.31658244 | 180.547813 |
| cg05362170 | 0.02933533 | 585585.669 | 3.79881902 | 9.0268E+10 |
| cg17653784 | 0.029337   | 2823479.6  | 4.4488791  | 1.7919E+12 |
| cg26752655 | 0.02934087 | 49338.2727 | 2.96159114 | 821945044  |
| cg18169610 | 0.02935497 | 71.5276727 | 1.53523243 | 3332.52988 |
| cg01565438 | 0.0293582  | 6.33488598 | 1.20357654 | 33.3429401 |
| cg10187792 | 0.02937645 | 7.96605806 | 1.23131742 | 51.5367363 |
| cg27395200 | 0.02937758 | 6.12854074 | 1.19934855 | 31.316177  |
| cg03035419 | 0.0293798  | 8.7205E+12 | 19.8308463 | 3.83E+24   |
| cg06328288 | 0.02938141 | 103.230044 | 1.59174718 | 6694.8081  |
| cg17543218 | 0.02938422 | 6.81173086 | 1.21203997 | 38.2822995 |
| cg02601318 | 0.02938489 | 4587.2023  | 2.32799104 | 9038877.1  |
| cg14653977 | 0.02938635 | 25.8460275 | 1.38530933 | 482.215143 |
| cg22109796 | 0.02938726 | 24.4390465 | 1.37753766 | 433.575803 |
| cg07266404 | 0.02939335 | 4.54083146 | 1.16367321 | 17.7190212 |
| cg02619135 | 0.02939425 | 35246622.9 | 5.70194665 | 2.1788E+14 |
| cg12656077 | 0.02939588 | 57.2193962 | 1.49983638 | 2182.94432 |
| cg10122766 | 0.02939811 | 3800771618 | 9.10849278 | 1.586E+18  |
| cg25637952 | 0.02939872 | 70660.4548 | 3.05942582 | 1631972845 |
| cg04544093 | 0.0294089  | 19678492   | 5.371227   | 7.2096E+13 |
| cg11439393 | 0.02941412 | 78.6721946 | 1.54775616 | 3998.89488 |
| cg14732852 | 0.02941659 | 939.81122  | 1.98359107 | 445275.815 |
| cg23323203 | 0.02942307 | 25.7041548 | 1.38362962 | 477.514766 |
| cg01064131 | 0.02942486 | 0.03589247 | 0.00179685 | 0.71695956 |

|            |            |            |            |            |
|------------|------------|------------|------------|------------|
| cg13538006 | 0.0294251  | 44.1026789 | 1.46032922 | 1331.92315 |
| cg04604505 | 0.02942684 | 1562982.31 | 4.16247357 | 5.8689E+11 |
| cg07533511 | 0.02942755 | 9.78742186 | 1.25619168 | 76.257173  |
| cg19760410 | 0.02943948 | 11.0421623 | 1.2712322  | 95.9143015 |
| cg07983905 | 0.0294401  | 4.20697403 | 1.15437437 | 15.3317943 |
| cg01683593 | 0.02944809 | 6017382.6  | 4.75437944 | 7.6159E+12 |
| cg23753247 | 0.02945221 | 25.9947195 | 1.38445685 | 488.079813 |
| cg02308245 | 0.02945349 | 69237.708  | 3.04287874 | 1575435838 |
| cg18628449 | 0.02945532 | 1099.86849 | 2.01201945 | 601242.052 |
| cg09297288 | 0.02945748 | 4.03551661 | 1.1494304  | 14.16823   |
| cg16679650 | 0.02945849 | 11.5236868 | 1.27633688 | 104.044128 |
| cg26694290 | 0.02945901 | 11.2274061 | 1.27301391 | 99.0206363 |
| cg17322163 | 0.0294597  | 60910.7054 | 3.00305592 | 1235446200 |
| cg25616762 | 0.02946314 | 1907.19745 | 2.1249856  | 1711730.24 |
| cg16713947 | 0.02946919 | 16.0211266 | 1.31879678 | 194.629304 |
| cg09433665 | 0.02946964 | 53653511.9 | 5.90297    | 4.8767E+14 |
| cg27359949 | 0.02947048 | 0.00019107 | 8.58E-08   | 0.42564263 |
| cg00957535 | 0.02947301 | 1081364.79 | 3.99769343 | 2.9251E+11 |
| cg24889708 | 0.02947395 | 5.09826191 | 1.17639295 | 22.0948913 |
| cg08579502 | 0.02948054 | 2.2548E+11 | 13.5472189 | 3.75E+21   |
| cg10743104 | 0.02950286 | 7.28483924 | 1.21863159 | 43.5479297 |
| cg08130144 | 0.02950429 | 8.21419775 | 1.23326766 | 54.7107872 |
| cg09848727 | 0.02951007 | 551023326  | 7.41347521 | 4.0956E+16 |
| cg24843609 | 0.02951368 | 0.16650175 | 0.03313717 | 0.83660835 |
| cg22532997 | 0.02951523 | 2142501.43 | 4.2652569  | 1.0762E+12 |
| cg23958863 | 0.02951638 | 34668.9198 | 2.82949152 | 424787985  |
| cg22830895 | 0.02953642 | 7.9714448  | 1.22913556 | 51.6980666 |
| cg24365117 | 0.02953772 | 10.323335  | 1.26110663 | 84.5061336 |
| cg26822986 | 0.02953807 | 5.18313206 | 1.17764292 | 22.8123972 |
| cg22174408 | 0.02954245 | 82165.9374 | 3.07811872 | 2193301128 |

|            |            |            |            |            |
|------------|------------|------------|------------|------------|
| cg01349853 | 0.02954264 | 15.543705  | 1.31335541 | 183.96145  |
| cg12527260 | 0.02954787 | 21.5800006 | 1.35675324 | 343.243275 |
| cg26413730 | 0.0295485  | 102.642234 | 1.58402595 | 6651.04523 |
| cg03360992 | 0.02955067 | 20.709588  | 1.35115332 | 317.422923 |
| cg26891370 | 0.02955207 | 14.6521751 | 1.3054878  | 164.449054 |
| cg00694336 | 0.02955469 | 83.7003797 | 1.55201832 | 4513.9632  |
| cg06189265 | 0.02955701 | 4988.88757 | 2.32866265 | 10688108.5 |
| cg08204817 | 0.02956057 | 6.9193E+10 | 11.9095749 | 4.02E+20   |
| cg02711212 | 0.02956158 | 4.50336353 | 1.1610772  | 17.4667826 |
| cg08199013 | 0.02956441 | 75.6590196 | 1.53617426 | 3726.32676 |
| cg07748159 | 0.02957145 | 0.11525386 | 0.01645837 | 0.8070939  |
| cg21252725 | 0.02957749 | 1925.75488 | 2.11687496 | 1751889.91 |
| cg02476533 | 0.0295786  | 38.1617809 | 1.43490051 | 1014.92857 |
| cg11699666 | 0.02958706 | 735.68095  | 1.92355222 | 281368.218 |
| cg25167574 | 0.02959145 | 6.38025072 | 1.20155629 | 33.8790614 |
| cg07690778 | 0.02959751 | 372.850964 | 1.79764523 | 77333.3019 |
| cg06521987 | 0.02960008 | 392517.984 | 3.58078244 | 4.3027E+10 |
| cg09181339 | 0.02960284 | 1473714.67 | 4.0811622  | 5.3216E+11 |
| cg10083643 | 0.0296069  | 17351706.9 | 5.2078978  | 5.7813E+13 |
| cg09150450 | 0.02961079 | 7.9367906  | 1.22755645 | 51.3154771 |
| cg23895155 | 0.02961139 | 930.691416 | 1.9670925  | 440338.474 |
| cg26918756 | 0.02961552 | 8.01413987 | 1.2286684  | 52.2732069 |
| cg02512352 | 0.0296211  | 4.77518205 | 1.16724938 | 19.535126  |
| cg02569236 | 0.02963085 | 13.7703032 | 1.29598343 | 146.314564 |
| cg11509669 | 0.02963284 | 8.81136039 | 1.23999369 | 62.6132797 |
| cg11335133 | 0.02963291 | 4.06250483 | 1.14863044 | 14.3683686 |
| cg07803108 | 0.02963587 | 10.1215106 | 1.25705346 | 81.4961178 |
| cg10723962 | 0.02963909 | 4.63428034 | 1.16361881 | 18.4566922 |
| cg01402045 | 0.02964172 | 712323583  | 7.49326459 | 6.7715E+16 |
| cg01941047 | 0.02964387 | 3.4678E+10 | 10.9967205 | 1.09E+20   |

|            |            |            |            |            |
|------------|------------|------------|------------|------------|
| cg21487267 | 0.02964645 | 4.4146E+13 | 22.274048  | 8.75E+25   |
| cg19305040 | 0.02965026 | 2262811096 | 8.39122763 | 6.102E+17  |
| cg23425533 | 0.02965161 | 5.97963045 | 1.19315065 | 29.9676998 |
| cg10089657 | 0.02965326 | 32.4015654 | 1.40978231 | 744.697555 |
| cg13077699 | 0.02965712 | 41.7967911 | 1.44555881 | 1208.50963 |
| cg22211300 | 0.02966065 | 704.488109 | 1.91020706 | 259816.596 |
| cg12222095 | 0.02966132 | 5.6438E+11 | 14.4483212 | 2.20E+22   |
| cg19381368 | 0.02966413 | 29.6010349 | 1.39697072 | 627.229518 |
| cg23930313 | 0.02967106 | 3.87809531 | 1.14304102 | 13.1575534 |
| cg02573089 | 0.02967283 | 651886.217 | 3.74505407 | 1.1347E+11 |
| cg24377179 | 0.02967395 | 22.1486793 | 1.35732782 | 361.418948 |
| cg17125688 | 0.02967583 | 39.3069385 | 1.43627565 | 1075.72346 |
| cg10872815 | 0.02967692 | 6.35647398 | 1.20006268 | 33.6688758 |
| cg17270013 | 0.0296814  | 30.3047932 | 1.39975781 | 656.09957  |
| cg07850533 | 0.02969131 | 157113.986 | 3.25070616 | 7593674505 |
| cg22841359 | 0.02969395 | 2.2684E+11 | 13.143257  | 3.92E+21   |
| cg26870192 | 0.0296955  | 5.33864954 | 1.17938676 | 24.1661006 |
| cg06935581 | 0.02970248 | 6664.54678 | 2.37966824 | 18664863.9 |
| cg02634501 | 0.02970688 | 2467566550 | 8.40626582 | 7.2433E+17 |
| cg23963351 | 0.02970748 | 23363421.8 | 5.31320156 | 1.0273E+14 |
| cg15695155 | 0.02970927 | 5.95629591 | 1.19201241 | 29.7626608 |
| cg08222053 | 0.02971301 | 0.02325965 | 0.00078333 | 0.69065129 |
| cg21232625 | 0.0297205  | 7.00067389 | 1.2109733  | 40.4711111 |
| cg20770516 | 0.02972506 | 49.1697508 | 1.46678364 | 1648.27609 |
| cg01814495 | 0.02972771 | 165819.124 | 3.2601405  | 8433986783 |
| cg21650862 | 0.02973169 | 20.1225877 | 1.34325967 | 301.444722 |
| cg06445928 | 0.02973352 | 25.5413681 | 1.37507487 | 474.418885 |
| cg14669362 | 0.02973964 | 4.68265306 | 1.16381511 | 18.8408274 |
| cg11939825 | 0.02974756 | 242.042374 | 1.71451842 | 34169.6595 |
| cg16246590 | 0.02975793 | 221850.955 | 3.34792645 | 1.4701E+10 |



|            |            |            |            |            |
|------------|------------|------------|------------|------------|
| cg06637618 | 0.02975987 | 14.9264754 | 1.30384071 | 170.879515 |
| cg01043831 | 0.02976025 | 7.03199702 | 1.21098696 | 40.8336206 |
| cg10567498 | 0.02976052 | 0.07988202 | 0.00817748 | 0.78033081 |
| cg21554588 | 0.02976901 | 13.0598043 | 1.28668879 | 132.556131 |
| cg10122252 | 0.0297711  | 0.00887073 | 0.00012508 | 0.62909798 |
| cg03554335 | 0.02977678 | 8.67257901 | 1.23592535 | 60.8561242 |
| cg05597001 | 0.02978214 | 11.3330641 | 1.26868917 | 101.237044 |
| cg03616164 | 0.02978444 | 352193.075 | 3.49677489 | 3.5473E+10 |
| cg08546494 | 0.02978671 | 7.67184181 | 1.22101879 | 48.2033176 |
| cg01045118 | 0.02979198 | 8.23061607 | 1.22938545 | 55.1031744 |
| cg15622885 | 0.0298073  | 767578.275 | 3.76780682 | 1.5637E+11 |
| cg17346022 | 0.02981237 | 0.12925347 | 0.02040984 | 0.81854924 |
| cg02160530 | 0.02981643 | 6.0198042  | 1.19199183 | 30.4012509 |
| cg25461508 | 0.02981791 | 5.91500507 | 1.18992817 | 29.4028545 |
| cg19263607 | 0.02981794 | 10.0589126 | 1.25337179 | 80.7276207 |
| cg08781140 | 0.02982029 | 2.55315373 | 1.09602183 | 5.94750378 |
| cg02896768 | 0.0298257  | 3.98944609 | 1.1448848  | 13.901556  |
| cg20058667 | 0.02982659 | 227569.686 | 3.34066492 | 1.5502E+10 |
| cg08434234 | 0.02982731 | 4.65576302 | 1.16229209 | 18.6494681 |
| cg26880187 | 0.02983095 | 22253.884  | 2.6607027  | 186129533  |
| cg02426376 | 0.02983193 | 59.2189504 | 1.49026598 | 2353.1934  |
| cg11334004 | 0.02983946 | 205.580985 | 1.68269548 | 25116.5716 |
| cg06473182 | 0.02984854 | 8159712.04 | 4.73157744 | 1.4072E+13 |
| cg14614337 | 0.02984856 | 33581525.8 | 5.43263885 | 2.0758E+14 |
| cg17832674 | 0.02985055 | 1595.31738 | 2.05475479 | 1238608.89 |
| cg20368841 | 0.02985475 | 1804.81713 | 2.07930111 | 1566567.18 |
| cg19036153 | 0.02985868 | 1411.88585 | 2.02973284 | 982110.355 |
| cg12545993 | 0.02985981 | 4.97120528 | 1.16943046 | 21.1324083 |
| cg26009944 | 0.02986325 | 23.6237498 | 1.36148325 | 409.907032 |
| cg20170271 | 0.02987289 | 7.80475645 | 1.22188318 | 49.8527392 |

|            |            |            |            |            |
|------------|------------|------------|------------|------------|
| cg00516067 | 0.02988199 | 9.47564893 | 1.24508039 | 72.1141568 |
| cg10968199 | 0.02988692 | 238.241192 | 1.70467333 | 33296.0367 |
| cg18575176 | 0.02990355 | 43025.146  | 2.82575061 | 655104941  |
| cg10247383 | 0.02990406 | 172.911712 | 1.65145066 | 18104.3618 |
| cg05151395 | 0.02990408 | 56.3380244 | 1.48064465 | 2143.64264 |
| cg23118464 | 0.02992968 | 5.03730278 | 1.17021109 | 21.6836256 |
| cg18627816 | 0.02993297 | 10.41084   | 1.25573065 | 86.3127687 |
| cg05862007 | 0.02994357 | 0.22100371 | 0.05655659 | 0.86360647 |
| cg21199629 | 0.02994365 | 30.1597111 | 1.39222322 | 653.349378 |
| cg18376163 | 0.02994418 | 4789.52426 | 2.27764543 | 10071603.9 |
| cg26616609 | 0.02996301 | 23.0147833 | 1.35568225 | 390.711208 |
| cg09704415 | 0.02998013 | 26.300625  | 1.37292922 | 503.829961 |
| cg21978251 | 0.02998099 | 5.90502356 | 1.18783668 | 29.3553009 |
| cg09981375 | 0.02998253 | 280855.22  | 3.37357902 | 2.3382E+10 |
| cg18492839 | 0.02999376 | 0.03265936 | 0.00148577 | 0.71789809 |
| cg24874612 | 0.03000612 | 4.7032941  | 1.16167595 | 19.0422944 |
| cg25028206 | 0.03000889 | 1.26E-07   | 7.38E-14   | 0.21489298 |
| cg07194846 | 0.03001407 | 21.331229  | 1.34457092 | 338.413783 |
| cg00561338 | 0.03001819 | 4.88386941 | 1.16579742 | 20.4599702 |
| cg07704437 | 0.03002383 | 357782.992 | 3.44366636 | 3.7172E+10 |
| cg11032474 | 0.03002805 | 32.5390322 | 1.4002664  | 756.133705 |
| cg24153171 | 0.03003104 | 1178.51389 | 1.98092804 | 701133.484 |
| cg05956498 | 0.03003367 | 145.060875 | 1.6177062  | 13007.7127 |
| cg12164596 | 0.03003481 | 10.7385295 | 1.25784643 | 91.6773404 |
| cg09216143 | 0.03003741 | 0.16468283 | 0.03228393 | 0.84005992 |
| cg13125627 | 0.0300392  | 4.36290274 | 1.15295056 | 16.5097455 |
| cg22473973 | 0.03004152 | 773.873215 | 1.90128138 | 314987.44  |
| cg27338695 | 0.03004553 | 169915019  | 6.23536866 | 4.6302E+15 |
| cg13957558 | 0.0300594  | 10.6541647 | 1.25648663 | 90.3401767 |
| cg21295575 | 0.03006466 | 0.2314671  | 0.06170045 | 0.86834079 |

|            |            |            |            |            |
|------------|------------|------------|------------|------------|
| cg15239888 | 0.03006791 | 305.814592 | 1.73674468 | 53849.3459 |
| cg21949305 | 0.03007017 | 10.1244326 | 1.25014681 | 81.993678  |
| cg01579086 | 0.03007606 | 1144.66466 | 1.97192041 | 664457.432 |
| cg23679724 | 0.0300781  | 8.69159599 | 1.23176751 | 61.3296262 |
| cg08069370 | 0.03007929 | 1617.62829 | 2.03851316 | 1283642.09 |
| cg14876077 | 0.03008429 | 8.00156596 | 1.22189809 | 52.398034  |
| cg01370334 | 0.03009001 | 45.8076167 | 1.4454565  | 1451.67825 |
| cg26985711 | 0.03009212 | 8.77272027 | 1.23266519 | 62.4343267 |
| cg11699265 | 0.03009559 | 5.07589117 | 1.16934681 | 22.0333873 |
| cg23710492 | 0.03011216 | 13.9368507 | 1.28849615 | 150.746131 |
| cg22880620 | 0.03011255 | 7.24184016 | 1.20983602 | 43.3482291 |
| cg18119621 | 0.03011269 | 1344.34301 | 1.99983077 | 903705.534 |
| cg01424889 | 0.03011582 | 124.846708 | 1.59094773 | 9797.11659 |
| cg09135551 | 0.0301185  | 5.14555445 | 1.17064182 | 22.6172772 |
| cg08299454 | 0.0301243  | 507.31279  | 1.82012705 | 141400.166 |
| cg24181662 | 0.03013047 | 9.58077389 | 1.24258072 | 73.8714411 |
| cg10453879 | 0.03013062 | 9.8772E+10 | 11.3948754 | 8.56E+20   |
| cg19115492 | 0.03013875 | 13.7466936 | 1.28630256 | 146.910681 |
| cg04314218 | 0.0301395  | 1424.10206 | 2.00880541 | 1009588.42 |
| cg02853019 | 0.03014219 | 518.073112 | 1.82268592 | 147255.074 |
| cg06416883 | 0.03014636 | 394.199329 | 1.77522709 | 87534.2156 |
| cg24986868 | 0.0301484  | 17.4271303 | 1.31575496 | 230.821755 |
| cg06768655 | 0.03014994 | 144.607552 | 1.61209348 | 12971.5456 |
| cg07424295 | 0.03015943 | 232.273245 | 1.68665371 | 31986.9217 |
| cg20254361 | 0.03016174 | 8.69713229 | 1.23062154 | 61.464965  |
| cg02792794 | 0.03016288 | 84740.7063 | 2.97012255 | 2417741083 |
| cg14826401 | 0.03016858 | 4.15E-13   | 2.65E-24   | 0.06494517 |
| cg25505476 | 0.03016935 | 53659612.3 | 5.5114573  | 5.2243E+14 |
| cg14219044 | 0.0301755  | 583856.398 | 3.57099787 | 9.546E+10  |
| cg06605053 | 0.03018221 | 9.4680355  | 1.24037701 | 72.2713302 |

|            |            |            |            |            |
|------------|------------|------------|------------|------------|
| cg08435603 | 0.03019401 | 74378315.4 | 5.67285022 | 9.7519E+14 |
| cg08016383 | 0.03019755 | 5.96954094 | 1.18656677 | 30.0323758 |
| cg05447008 | 0.03019833 | 3.90898821 | 1.13942167 | 13.4104776 |
| cg04246008 | 0.03020198 | 8801.55027 | 2.38547416 | 32474586.5 |
| cg14309262 | 0.03020314 | 156.114218 | 1.62159794 | 15029.403  |
| cg02887499 | 0.03021749 | 545940.17  | 3.53731981 | 8.4259E+10 |
| cg13298466 | 0.0302189  | 0.05659855 | 0.00421577 | 0.75985999 |
| cg02403395 | 0.03022847 | 3.05712324 | 1.11271503 | 8.3992777  |
| cg08125503 | 0.03023307 | 73.0165275 | 1.50678096 | 3538.28023 |
| cg12730843 | 0.03023332 | 27.2765788 | 1.37147532 | 542.490074 |
| cg23175074 | 0.0302357  | 8.5578707  | 1.22764916 | 59.6564176 |
| cg08718097 | 0.03023832 | 0.29432892 | 0.09736519 | 0.88973804 |
| cg01169952 | 0.03024435 | 179.330703 | 1.64133733 | 19593.4744 |
| cg02059453 | 0.03025396 | 24.4624248 | 1.3567898  | 441.048591 |
| cg02285386 | 0.03025661 | 22.2095367 | 1.34427637 | 366.936093 |
| cg08143349 | 0.03026769 | 27.1667141 | 1.37009528 | 538.670822 |
| cg19044674 | 0.03026913 | 6.62E-09   | 2.64E-16   | 0.16599294 |
| cg00750366 | 0.03027808 | 5.51639824 | 1.17674579 | 25.860003  |
| cg23356310 | 0.03028191 | 0.18911632 | 0.04191538 | 0.8532664  |
| cg05343713 | 0.03029961 | 698.903965 | 1.86530135 | 261870.154 |
| cg13516551 | 0.03030307 | 3379.22558 | 2.16684377 | 5269953.3  |
| cg18325192 | 0.03030984 | 8.42462047 | 1.22475094 | 57.9499291 |
| cg21389025 | 0.03031101 | 3.9681E+14 | 24.4721734 | 6.43E+27   |
| cg23158347 | 0.03032288 | 1711172665 | 7.5458225  | 3.8804E+17 |
| cg10205925 | 0.03032675 | 64.2859619 | 1.48538594 | 2782.22971 |
| cg20247708 | 0.03033593 | 63322269.4 | 5.50872517 | 7.2788E+14 |
| cg10575842 | 0.03033685 | 6.27398457 | 1.19056385 | 33.0623866 |
| cg06521149 | 0.03034351 | 0.18248641 | 0.03913852 | 0.85085719 |
| cg02289168 | 0.03034961 | 155118.511 | 3.10928529 | 7738676346 |
| cg22349506 | 0.03035412 | 6.12818295 | 1.18770471 | 31.6194977 |

|            |            |            |            |            |
|------------|------------|------------|------------|------------|
| cg26814987 | 0.03036524 | 4.74407588 | 1.15909148 | 19.4171525 |
| cg14344110 | 0.03036575 | 685.201735 | 1.85739994 | 252773.464 |
| cg03640148 | 0.03036731 | 65.2860298 | 1.48618973 | 2867.91491 |
| cg22232207 | 0.03036826 | 3.51029336 | 1.1264308  | 10.939118  |
| cg22525895 | 0.03037048 | 6.2969394  | 1.19057435 | 33.3044684 |
| cg22714033 | 0.03037413 | 2707.31889 | 2.11510671 | 3465345.52 |
| cg20828120 | 0.03038031 | 186.480076 | 1.64108586 | 21190.1275 |
| cg07862554 | 0.03039147 | 5.9813066  | 1.18454161 | 30.2024246 |
| cg25717844 | 0.03039478 | 6.73166827 | 1.19782997 | 37.8312106 |
| cg10083258 | 0.03040305 | 5.77385402 | 1.18045828 | 28.2410575 |
| cg12627700 | 0.03040778 | 49177570.3 | 5.34076938 | 4.5282E+14 |
| cg21784768 | 0.03040964 | 12671930.7 | 4.69701872 | 3.4187E+13 |
| cg07322750 | 0.03042023 | 27.172075  | 1.36635517 | 540.358522 |
| cg15267303 | 0.03042485 | 5.22E-08   | 1.33E-14   | 0.2050189  |
| cg19895051 | 0.03042661 | 191803627  | 6.0627107  | 6.068E+15  |
| cg14970695 | 0.0304354  | 6.47080558 | 1.19286277 | 35.1015439 |
| cg13325231 | 0.03043695 | 7.59706315 | 1.21105711 | 47.6570162 |
| cg13823666 | 0.0304371  | 13.7103942 | 1.28049374 | 146.798772 |
| cg01399540 | 0.03043931 | 73939.5418 | 2.88226854 | 1896789205 |
| cg24517380 | 0.03044131 | 49.2757943 | 1.4447918  | 1680.59087 |
| cg12810523 | 0.03044216 | 8.38725176 | 1.222353   | 57.5496538 |
| cg11166999 | 0.03044616 | 0.0513382  | 0.00348817 | 0.75558622 |
| cg13903087 | 0.03044702 | 0.05687736 | 0.00424023 | 0.7629391  |
| cg18798248 | 0.03044999 | 3.36884627 | 1.12143908 | 10.1201442 |
| cg27392956 | 0.03045123 | 287.501445 | 1.70605305 | 48449.303  |
| cg22617213 | 0.03045679 | 31.111216  | 1.38300412 | 699.858916 |
| cg10315334 | 0.03045774 | 11.5254743 | 1.25932656 | 105.482217 |
| cg21042539 | 0.03045927 | 43.6850823 | 1.42792946 | 1336.47108 |
| cg26232870 | 0.03045982 | 25.1423587 | 1.35542021 | 466.378025 |
| cg13612524 | 0.03047    | 283.990446 | 1.70309091 | 47355.4129 |

|            |            |            |            |            |
|------------|------------|------------|------------|------------|
| cg20333292 | 0.03047336 | 7.45087256 | 1.20835492 | 45.943043  |
| cg03169170 | 0.03047394 | 196104.87  | 3.15306944 | 1.2197E+10 |
| cg06922635 | 0.03047708 | 4.7504175  | 1.15813636 | 19.485155  |
| cg21399057 | 0.03047998 | 4.78058778 | 1.15879874 | 19.7221646 |
| cg01656221 | 0.03048729 | 16.5908806 | 1.30276081 | 211.287688 |
| cg24116028 | 0.03049846 | 0.05300318 | 0.0037038  | 0.7585009  |
| cg17504394 | 0.03050191 | 3.06759144 | 1.1112167  | 8.46830077 |
| cg17153568 | 0.03050261 | 10.423669  | 1.2467325  | 87.1501098 |
| cg24105797 | 0.03050531 | 2.2087E+10 | 9.39730565 | 5.1914E+19 |
| cg14212180 | 0.03050656 | 283.8774   | 1.70111073 | 47372.7999 |
| cg27422678 | 0.0305074  | 301525.739 | 3.27597424 | 2.7753E+10 |
| cg12230071 | 0.03050812 | 36298.2854 | 2.68440275 | 490822595  |
| cg03198733 | 0.0305108  | 7.73126252 | 1.21206276 | 49.3146249 |
| cg02837488 | 0.03051315 | 1147.02544 | 1.93937805 | 678396.544 |
| cg07012770 | 0.03052294 | 4.35661999 | 1.14830979 | 16.5287607 |
| cg25289803 | 0.03052454 | 3.21745861 | 1.11605379 | 9.2755744  |
| cg19319928 | 0.03052627 | 9.00665884 | 1.22936348 | 65.985288  |
| cg23861541 | 0.0305292  | 0.21727854 | 0.05448911 | 0.86641102 |
| cg07783282 | 0.03054432 | 6.14406858 | 1.18576089 | 31.8357428 |
| cg04035209 | 0.03054657 | 5.28972976 | 1.16919208 | 23.9321164 |
| cg01045986 | 0.03054961 | 5374.19908 | 2.23864348 | 12901570.1 |
| cg08576184 | 0.03054979 | 17.2877473 | 1.30654901 | 228.744735 |
| cg26009773 | 0.03055016 | 1684278068 | 7.33857809 | 3.8656E+17 |
| cg07537523 | 0.03055718 | 19.0978593 | 1.31865615 | 276.590854 |
| cg03259703 | 0.03056089 | 0.1507212  | 0.0271271  | 0.83742374 |
| cg11388673 | 0.03056491 | 0.27024559 | 0.0825626  | 0.88457338 |
| cg08247611 | 0.03056551 | 17493294.9 | 4.77433229 | 6.4096E+13 |
| cg27219362 | 0.03057013 | 0.22312979 | 0.05730096 | 0.86886689 |
| cg00662646 | 0.03057433 | 10118.1147 | 2.37261282 | 43149157.9 |
| cg06237983 | 0.03057823 | 9.34852454 | 1.23289374 | 70.8860044 |

|            |            |            |            |            |
|------------|------------|------------|------------|------------|
| cg08468187 | 0.03058584 | 22.66823   | 1.3393697  | 383.649602 |
| cg13144594 | 0.03058935 | 71.9847709 | 1.492272   | 3472.4281  |
| cg06916552 | 0.03059425 | 505329.015 | 3.41770073 | 7.4716E+10 |
| cg27628552 | 0.03059584 | 16238.0986 | 2.47731181 | 106436278  |
| cg07490151 | 0.03059865 | 5542.33265 | 2.23996329 | 13713372.6 |
| cg12179176 | 0.03060009 | 9.18587286 | 1.2305438  | 68.5715213 |
| cg14269191 | 0.03060026 | 0.17960649 | 0.03787907 | 0.85161774 |
| cg18913687 | 0.03060165 | 1.9695E+10 | 9.18163532 | 4.2247E+19 |
| cg10164640 | 0.03060368 | 47.1036893 | 1.43376087 | 1547.50879 |
| cg02203311 | 0.0306068  | 4970596574 | 8.06708681 | 3.0627E+18 |
| cg05749728 | 0.03061155 | 3.94226945 | 1.13682385 | 13.6709733 |
| cg05704893 | 0.03061396 | 305.737822 | 1.70729913 | 54750.5791 |
| cg03451178 | 0.03061407 | 7.36205766 | 1.20514489 | 44.9737565 |
| cg07024545 | 0.03062144 | 36626860.4 | 5.08970779 | 2.6358E+14 |
| cg05235884 | 0.03062351 | 0.18545277 | 0.04025576 | 0.8543555  |
| cg13561226 | 0.03063797 | 81.9695402 | 1.5087672  | 4453.30832 |
| cg15616257 | 0.03064237 | 6.06796909 | 1.18323587 | 31.1182662 |
| cg02653313 | 0.03064246 | 6.3298E+13 | 19.4043224 | 2.06E+26   |
| cg07813370 | 0.03064354 | 3849.0244  | 2.16048724 | 6857244.3  |
| cg06363129 | 0.03064661 | 6.75292481 | 1.19505155 | 38.159018  |
| cg03415545 | 0.03065311 | 6.07320278 | 1.18320645 | 31.1727441 |
| cg23211736 | 0.03065642 | 9.01513923 | 1.22755871 | 66.2068012 |
| cg23536255 | 0.03066794 | 38.9855488 | 1.40681612 | 1080.36366 |
| cg21697812 | 0.0306719  | 0.14410837 | 0.02487436 | 0.83488449 |
| cg24718991 | 0.03067898 | 2637950.74 | 3.96219488 | 1.7563E+12 |
| cg11816600 | 0.03067942 | 771493.502 | 3.53348292 | 1.6845E+11 |
| cg07407499 | 0.0306808  | 9.64001338 | 1.23488262 | 75.2540011 |
| cg24476453 | 0.03069269 | 2317.97714 | 2.05637218 | 2612862.63 |
| cg00674304 | 0.03069421 | 5.41799003 | 1.17023433 | 25.0843913 |
| cg15128200 | 0.03069617 | 6.11604628 | 1.18348062 | 31.6067889 |

|            |            |            |            |            |
|------------|------------|------------|------------|------------|
| cg00042409 | 0.03069981 | 11.2818777 | 1.25278513 | 101.598239 |
| cg16361168 | 0.03070737 | 114.489613 | 1.55378442 | 8436.09398 |
| cg24803730 | 0.03071667 | 12.7217166 | 1.26656352 | 127.780464 |
| cg17636471 | 0.03072021 | 1.01E-13   | 1.65E-25   | 0.06207503 |
| cg27487704 | 0.0307205  | 17345.844  | 2.47622062 | 121507067  |
| cg19091719 | 0.03072862 | 4.57255985 | 1.15158166 | 18.1561624 |
| cg07591620 | 0.03073    | 95.4550321 | 1.52688473 | 5967.48592 |
| cg00178359 | 0.03073799 | 5.32231291 | 1.16783188 | 24.2560725 |
| cg01170643 | 0.03074298 | 1147099.91 | 3.64881448 | 3.6062E+11 |
| cg07907315 | 0.03075527 | 7.11617141 | 1.19951692 | 42.2169082 |
| cg23820828 | 0.03075732 | 10.0431639 | 1.23841432 | 81.4470086 |
| cg14940444 | 0.03075855 | 7.66778017 | 1.20780378 | 48.6791429 |
| cg08805821 | 0.03076289 | 17.8988984 | 1.30644101 | 245.223903 |
| cg11524454 | 0.03076481 | 10.602925  | 1.24453649 | 90.3324398 |
| cg05637945 | 0.03076875 | 263535.28  | 3.1778641  | 2.1855E+10 |
| cg14184729 | 0.03076949 | 92.8279818 | 1.52145552 | 5663.67801 |
| cg21638712 | 0.03078962 | 4.78124437 | 1.15576437 | 19.7793758 |
| cg10927534 | 0.03079787 | 3622021.04 | 4.04131551 | 3.2462E+12 |
| cg16793187 | 0.03079999 | 10.2252662 | 1.23981129 | 84.332245  |
| cg13725062 | 0.03080047 | 0.01152649 | 0.00020073 | 0.66189257 |
| cg21931680 | 0.03080174 | 11.1446401 | 1.24969173 | 99.3869134 |
| cg21950518 | 0.03080227 | 16.7364686 | 1.29755596 | 215.874604 |
| cg15456099 | 0.03080644 | 12389451   | 4.52462607 | 3.3925E+13 |
| cg21210285 | 0.03081052 | 546.358761 | 1.790415   | 166725.533 |
| cg24397995 | 0.0308123  | 138.027435 | 1.5765966  | 12083.987  |
| cg04789663 | 0.03081376 | 10.0893248 | 1.23806426 | 82.220671  |
| cg10160975 | 0.03081711 | 5.45167052 | 1.16958537 | 25.4113228 |
| cg09575314 | 0.0308175  | 45536.661  | 2.69323713 | 769923847  |
| cg08863844 | 0.03082238 | 16.6675568 | 1.29666317 | 214.24797  |
| cg15492422 | 0.03082553 | 8.5785E+10 | 10.2188133 | 7.20E+20   |



|            |            |            |            |            |
|------------|------------|------------|------------|------------|
| cg07796220 | 0.03083086 | 13.6611137 | 1.27291132 | 146.613535 |
| cg17697381 | 0.03083237 | 18151.9897 | 2.47193357 | 133294331  |
| cg09612202 | 0.03083252 | 463.759668 | 1.76221116 | 122047.252 |
| cg26029577 | 0.03083347 | 4.6276752  | 1.1518591  | 18.5920117 |
| cg14040796 | 0.03084699 | 51.7309509 | 1.43885953 | 1859.86973 |
| cg27087555 | 0.03084707 | 116.343157 | 1.55050501 | 8729.88489 |
| cg22157173 | 0.03084777 | 138.98078  | 1.57610322 | 12255.3251 |
| cg18259504 | 0.03085105 | 22.7590178 | 1.33385353 | 388.328163 |
| cg06973760 | 0.03085422 | 21274952.8 | 4.73574152 | 9.5576E+13 |
| cg24405617 | 0.03085625 | 4.94069452 | 1.15860859 | 21.0687739 |
| cg14186963 | 0.03086035 | 8.4813194  | 1.21770719 | 59.0723119 |
| cg14523898 | 0.03086426 | 5.37015324 | 1.16745726 | 24.7020142 |
| cg07270285 | 0.03086446 | 0.12626681 | 0.01929123 | 0.82645342 |
| cg21747310 | 0.03087422 | 5.90119535 | 1.17752923 | 29.5738787 |
| cg10232654 | 0.03087605 | 8.61300891 | 1.21921367 | 60.8457111 |
| cg20599535 | 0.03088022 | 1.5743E+10 | 8.67759821 | 2.8563E+19 |
| cg01105418 | 0.03088435 | 6.30618551 | 1.18462684 | 33.5700444 |
| cg00504595 | 0.03088975 | 7.5313173  | 1.20406456 | 47.1077232 |
| cg27093637 | 0.0308945  | 0.20054604 | 0.04662177 | 0.86265955 |
| cg07318204 | 0.03089661 | 5.06099825 | 1.16076854 | 22.0661591 |
| cg10227731 | 0.03089689 | 609496.757 | 3.40287626 | 1.0917E+11 |
| cg04186815 | 0.03090264 | 152.065565 | 1.58686105 | 14572.1241 |
| cg21911557 | 0.03090353 | 5.864E+12  | 14.9071899 | 2.31E+24   |
| cg10248985 | 0.0309063  | 15.1121176 | 1.28340043 | 177.946098 |
| cg27370013 | 0.03090777 | 12.1488318 | 1.25789292 | 117.334401 |
| cg17942763 | 0.03091079 | 10.746882  | 1.24375314 | 92.8604465 |
| cg19893185 | 0.03091119 | 7.379352   | 1.20153042 | 45.3212293 |
| cg02498311 | 0.03091776 | 9.67E-06   | 2.70E-10   | 0.34637589 |
| cg26576398 | 0.03091924 | 8.01605369 | 1.2105897  | 53.0791866 |
| cg15943584 | 0.03092412 | 49.3801859 | 1.43037027 | 1704.73535 |

|            |            |            |            |            |
|------------|------------|------------|------------|------------|
| cg04636406 | 0.03092489 | 6.9669697  | 1.19502821 | 40.6171725 |
| cg17868910 | 0.03092507 | 20.3463147 | 1.31855146 | 313.96008  |
| cg23880953 | 0.03092565 | 3900.11604 | 2.13594252 | 7121401.89 |
| cg09675001 | 0.03093033 | 12.3319766 | 1.25923707 | 120.769671 |
| cg25724712 | 0.03093104 | 0.0016448  | 4.87E-06   | 0.55536133 |
| cg10943191 | 0.03093133 | 1060.07219 | 1.89484012 | 593059.559 |
| cg05388307 | 0.03093725 | 2.4774E+13 | 16.9223577 | 3.63E+25   |
| cg14089881 | 0.03093762 | 0.29821604 | 0.09937006 | 0.8949658  |
| cg24767968 | 0.03093907 | 5.13048068 | 1.16178777 | 22.656317  |
| cg22864672 | 0.03094124 | 113.128502 | 1.54277933 | 8295.45599 |
| cg08284713 | 0.03094515 | 607721.208 | 3.39014721 | 1.0894E+11 |
| cg15640707 | 0.03094666 | 1.04E-06   | 3.82E-12   | 0.28283982 |
| cg19701264 | 0.03094984 | 9.50013575 | 1.22915927 | 73.4262689 |
| cg20458811 | 0.03095021 | 9.19030788 | 1.22542437 | 68.9244978 |
| cg25978167 | 0.03095155 | 1356.60954 | 1.93668071 | 950280.26  |
| cg08163199 | 0.03095538 | 4.03284849 | 1.13628083 | 14.3132459 |
| cg08229694 | 0.03095571 | 6587456910 | 7.93534122 | 5.4685E+18 |
| cg15506890 | 0.03095982 | 5.75101978 | 1.17378611 | 28.1773895 |
| cg09874482 | 0.03097869 | 7.81212977 | 1.20693054 | 50.5657694 |
| cg25220781 | 0.03098625 | 19.863034  | 1.31434429 | 300.18019  |
| cg12253571 | 0.03098768 | 769.463439 | 1.83622521 | 322440.831 |
| cg15190747 | 0.03099253 | 0.14929792 | 0.02652248 | 0.84041425 |
| cg06693487 | 0.03099599 | 6.33E-05   | 9.70E-09   | 0.41330265 |
| cg06838028 | 0.03099865 | 15.0736055 | 1.28136121 | 177.322039 |
| cg14826425 | 0.03100003 | 3.96096717 | 1.13403303 | 13.8349241 |
| cg11208039 | 0.0310084  | 107.109652 | 1.53246019 | 7486.31358 |
| cg13364230 | 0.03101073 | 9.42200184 | 1.22732228 | 72.3315469 |
| cg12076945 | 0.03101118 | 9106929.28 | 4.32027895 | 1.9197E+13 |
| cg00384653 | 0.03101134 | 0.02101082 | 0.00062817 | 0.70276679 |
| cg03132197 | 0.03101141 | 4923958.31 | 4.08429188 | 5.9362E+12 |

|            |            |            |            |            |
|------------|------------|------------|------------|------------|
| cg17785773 | 0.03101258 | 5.70061063 | 1.17225762 | 27.7216894 |
| cg17477995 | 0.03101304 | 158.362704 | 1.58797821 | 15792.878  |
| cg05605149 | 0.03101725 | 1.9896E+10 | 8.71201908 | 4.5437E+19 |
| cg01467604 | 0.03102553 | 214531.534 | 3.06509813 | 1.5015E+10 |
| cg09619475 | 0.0310302  | 9604540.97 | 4.33414941 | 2.1284E+13 |
| cg22934878 | 0.03103087 | 0.11336531 | 0.0156748  | 0.81989495 |
| cg02697115 | 0.03104691 | 5.28919915 | 1.16390737 | 24.0359572 |
| cg11797883 | 0.03105011 | 58091626.4 | 5.09759663 | 6.6201E+14 |
| cg22703115 | 0.0310525  | 6.54257357 | 1.18661524 | 36.0734193 |
| cg18187762 | 0.03106514 | 2330.29988 | 2.02544957 | 2681033.19 |
| cg17195127 | 0.03106854 | 94.1131202 | 1.51222667 | 5857.11097 |
| cg04599533 | 0.03107239 | 96946610.7 | 5.32927752 | 1.7636E+15 |
| cg10634273 | 0.03107409 | 59.2583575 | 1.44970748 | 2422.24931 |
| cg10324701 | 0.03107709 | 0.12740037 | 0.01957655 | 0.82909663 |
| cg16998150 | 0.03107765 | 4.35828409 | 1.14327588 | 16.6142228 |
| cg14593314 | 0.03107918 | 532978.941 | 3.31775435 | 8.562E+10  |
| cg01117697 | 0.03107935 | 10.0414471 | 1.23342423 | 81.7485639 |
| cg00945238 | 0.03108113 | 7.22416063 | 1.19700974 | 43.5990577 |
| cg14966074 | 0.03108193 | 6.55358871 | 1.18644241 | 36.200261  |
| cg02988775 | 0.03108776 | 7.25580819 | 1.19740072 | 43.9675303 |
| cg03860859 | 0.03109275 | 233.610905 | 1.64150042 | 33246.4459 |
| cg14340070 | 0.03109726 | 56.4167914 | 1.44251283 | 2206.46519 |
| cg03133269 | 0.03110324 | 221.718295 | 1.63322483 | 30099.3478 |
| cg03994465 | 0.0311051  | 10.9236777 | 1.24249421 | 96.038061  |
| cg07447902 | 0.03110972 | 638503350  | 6.30053866 | 6.4707E+16 |
| cg00194126 | 0.03111478 | 0.13599266 | 0.02216518 | 0.8343721  |
| cg03284670 | 0.03111635 | 0.17355431 | 0.0353095  | 0.85305935 |
| cg20568322 | 0.03111674 | 57.5852269 | 1.4445858  | 2295.50807 |
| cg17254405 | 0.03111882 | 18.9857178 | 1.30616892 | 275.965439 |
| cg01803717 | 0.03112019 | 30761202.6 | 4.77943051 | 1.9798E+14 |

|            |            |            |            |            |
|------------|------------|------------|------------|------------|
| cg03040420 | 0.03112069 | 719.293539 | 1.81633261 | 284850.468 |
| cg13598790 | 0.03112372 | 62992.4194 | 2.72484192 | 1456247744 |
| cg24055398 | 0.03112667 | 57.2130581 | 1.44342322 | 2267.75763 |
| cg15673540 | 0.03113605 | 179.916489 | 1.60105581 | 20217.873  |
| cg13666293 | 0.03113714 | 758.432007 | 1.82401075 | 315359.495 |
| cg21845654 | 0.03114969 | 400360.907 | 3.21670244 | 4.983E+10  |
| cg05355757 | 0.03115825 | 4.729932   | 1.15103909 | 19.4365743 |
| cg20090147 | 0.03115956 | 167744503  | 5.55218777 | 5.068E+15  |
| cg10714284 | 0.03116122 | 11464.3099 | 2.33023937 | 56402103.1 |
| cg25953133 | 0.03116456 | 190.454257 | 1.60803912 | 22557.1775 |
| cg18236571 | 0.03117105 | 7.61562608 | 1.2015837  | 48.2677657 |
| cg07718321 | 0.0311714  | 529.434498 | 1.76349901 | 158945.872 |
| cg21084284 | 0.03117763 | 8.73655386 | 1.21650751 | 62.7430349 |
| cg05251593 | 0.03118343 | 7.96590382 | 1.20631403 | 52.6029063 |
| cg15050111 | 0.03118675 | 15948.6605 | 2.39771993 | 106084022  |
| cg18058279 | 0.03118749 | 0.01968149 | 0.00055243 | 0.7011993  |
| cg07723431 | 0.03119054 | 1547.56664 | 1.94170032 | 1233435.71 |
| cg19005707 | 0.03119214 | 0.13507848 | 0.0218633  | 0.83455833 |
| cg02098923 | 0.03119232 | 9.91005843 | 1.23022657 | 79.8302205 |
| cg19771626 | 0.03119942 | 0.12266436 | 0.01818556 | 0.8273897  |
| cg02454483 | 0.03119991 | 4493298500 | 7.44070005 | 2.7134E+18 |
| cg03308399 | 0.03120584 | 5.30207725 | 1.16250106 | 24.1823634 |
| cg20082196 | 0.03121265 | 7.0478903  | 1.19267018 | 41.6483606 |
| cg02227867 | 0.03121835 | 1743.79669 | 1.96056235 | 1550997.29 |
| cg26383001 | 0.03122351 | 257342.807 | 3.07520401 | 2.1535E+10 |
| cg00630080 | 0.03122535 | 98132.5385 | 2.81883517 | 3416303020 |
| cg17460737 | 0.03124246 | 100.147277 | 1.51424566 | 6623.41477 |
| cg02753742 | 0.03124367 | 21.40447   | 1.31773788 | 347.680174 |
| cg04176995 | 0.03124862 | 32.9249375 | 1.3697213  | 791.439477 |
| cg01439366 | 0.03126602 | 122381.36  | 2.86815045 | 5221900820 |

|            |            |            |            |            |
|------------|------------|------------|------------|------------|
| cg13864794 | 0.03126825 | 4.1506452  | 1.13654709 | 15.1580658 |
| cg20922251 | 0.0312693  | 6830.49548 | 2.21214009 | 21090738.7 |
| cg12510981 | 0.03127634 | 4.17340896 | 1.13703551 | 15.3182044 |
| cg16985320 | 0.03128521 | 1798.07755 | 1.96069215 | 1648949.76 |
| cg00931558 | 0.03128533 | 4.9485498  | 1.15449195 | 21.2111874 |
| cg10864356 | 0.03128628 | 90636791.4 | 5.18599602 | 1.5841E+15 |
| cg07509155 | 0.03128881 | 13.4290651 | 1.26276017 | 142.813967 |
| cg12968701 | 0.03129138 | 0.15727154 | 0.02920424 | 0.84694338 |
| cg17186803 | 0.03129336 | 9.45476603 | 1.22351388 | 73.0621877 |
| cg13532478 | 0.03129777 | 30.5036399 | 1.35910386 | 684.621741 |
| cg07187607 | 0.03129902 | 13.4678526 | 1.2629069  | 143.623455 |
| cg17324226 | 0.03130271 | 1364.41388 | 1.91137477 | 973971.855 |
| cg03506799 | 0.03130507 | 2347017.39 | 3.72942004 | 1.477E+12  |
| cg14886640 | 0.03130729 | 159.442007 | 1.57622523 | 16128.2493 |
| cg12482825 | 0.03131271 | 12.821045  | 1.25710341 | 130.760281 |
| cg10585486 | 0.03131468 | 18.8615758 | 1.30135154 | 273.376586 |
| cg11340260 | 0.03131634 | 11.4161522 | 1.24402638 | 104.763479 |
| cg18048370 | 0.0313208  | 14.0608463 | 1.2674083  | 155.993455 |
| cg01550215 | 0.03133159 | 9393.31683 | 2.26946413 | 38878958.2 |
| cg25852545 | 0.03133404 | 1.1622E+14 | 18.1935649 | 7.42E+26   |
| cg06649191 | 0.03133787 | 21.9592281 | 1.318711   | 365.665942 |
| cg00489408 | 0.03134829 | 117.293087 | 1.53179088 | 8981.42724 |
| cg07667560 | 0.03135094 | 9.52310112 | 1.22345085 | 74.125949  |
| cg10224037 | 0.03135279 | 539.441968 | 1.75566832 | 165747.501 |
| cg12635790 | 0.03137056 | 5.9971278  | 1.17363392 | 30.6446    |
| cg17083504 | 0.03137057 | 3007.51191 | 2.0458898  | 4421121.74 |
| cg20651988 | 0.03137705 | 54.8331343 | 1.43012876 | 2102.37895 |
| cg03940662 | 0.03137883 | 17.4561848 | 1.29107159 | 236.019747 |
| cg11653266 | 0.03137939 | 1608615.36 | 3.58458132 | 7.2188E+11 |
| cg24684739 | 0.03138387 | 6469939.79 | 4.05762243 | 1.0316E+13 |

|            |            |            |            |            |
|------------|------------|------------|------------|------------|
| cg10773064 | 0.03139061 | 8.41165081 | 1.20938968 | 58.5054349 |
| cg04467350 | 0.03140783 | 391308701  | 5.83820012 | 2.6228E+16 |
| cg03938320 | 0.03141163 | 7.0823E+10 | 9.27673162 | 5.41E+20   |
| cg21440776 | 0.03142121 | 0.15658662 | 0.02892431 | 0.84770797 |
| cg14597534 | 0.03142249 | 3.83129594 | 1.12713698 | 13.0231097 |
| cg10678266 | 0.03142359 | 9.46412813 | 1.2216985  | 73.3157333 |
| cg06856563 | 0.03142518 | 2.20E-06   | 1.55E-11   | 0.31335297 |
| cg27547291 | 0.03142832 | 8.64031455 | 1.21175946 | 61.6087913 |
| cg09022720 | 0.03143329 | 6.28805412 | 1.17788337 | 33.5683698 |
| cg21071097 | 0.03143563 | 9.31177267 | 1.21975718 | 71.0871901 |
| cg19906926 | 0.03143912 | 18.9862419 | 1.29955907 | 277.384375 |
| cg03924483 | 0.03144323 | 46.812829  | 1.4081379  | 1556.26871 |
| cg23017840 | 0.03144638 | 30.9508599 | 1.35715418 | 705.856226 |
| cg18897345 | 0.03145208 | 6.85E-05   | 1.10E-08   | 0.42619413 |
| cg24226590 | 0.03145271 | 8.91931819 | 1.21484622 | 65.4850267 |
| cg26603598 | 0.03145683 | 0.14703222 | 0.02563633 | 0.84327483 |
| cg05824225 | 0.03146126 | 0.00367409 | 2.22E-05   | 0.60751817 |
| cg24302080 | 0.0314658  | 725336304  | 6.12946398 | 8.5833E+16 |
| cg19954234 | 0.03147282 | 9.00101594 | 1.21554339 | 66.6519095 |
| cg00501711 | 0.03147668 | 15.843119  | 1.27807964 | 196.391846 |
| cg17199658 | 0.03148631 | 10.9382049 | 1.2365599  | 96.7557869 |
| cg25213362 | 0.0314866  | 7.4392503  | 1.19496222 | 46.3131335 |
| cg09534243 | 0.03148852 | 50444.9654 | 2.61432016 | 973367596  |
| cg16930572 | 0.03149659 | 4.70266285 | 1.14719987 | 19.2774061 |
| cg26072123 | 0.03152421 | 4116256.37 | 3.85254704 | 4.398E+12  |
| cg24137660 | 0.03152579 | 0.1555158  | 0.02851771 | 0.8480752  |
| cg23112423 | 0.03152845 | 0.22671295 | 0.05861569 | 0.87687723 |
| cg22995904 | 0.03152887 | 0.18815354 | 0.04104425 | 0.86252662 |
| cg07079755 | 0.03153993 | 3484.19039 | 2.05765489 | 5899717.56 |
| cg10322499 | 0.03154746 | 61.4092944 | 1.43924347 | 2620.19702 |

|            |            |            |            |            |
|------------|------------|------------|------------|------------|
| cg21369988 | 0.03154893 | 492515.451 | 3.18667913 | 7.612E+10  |
| cg10997640 | 0.03155179 | 2507624.64 | 3.67909416 | 1.7092E+12 |
| cg01561271 | 0.03155357 | 11445.5916 | 2.28441073 | 57345890.1 |
| cg16529993 | 0.03156182 | 4846.75401 | 2.11651901 | 11098896   |
| cg05085816 | 0.03156492 | 46358.9764 | 2.58339922 | 831909632  |
| cg16098981 | 0.03156584 | 4.97224318 | 1.15219979 | 21.4573917 |
| cg02674839 | 0.03157484 | 0.03401003 | 0.00155901 | 0.74193333 |
| cg27285599 | 0.03157726 | 4.05616853 | 1.13156321 | 14.5396236 |
| cg19099736 | 0.03157884 | 1049.00477 | 1.84765332 | 595572.23  |
| cg21872393 | 0.03158471 | 12965.819  | 2.30608583 | 72899481.8 |
| cg02429905 | 0.03158516 | 4.57884579 | 1.14366126 | 18.3322017 |
| cg18394527 | 0.03158585 | 84661.1485 | 2.72109316 | 2634055377 |
| cg25032094 | 0.03159387 | 3.89414234 | 1.12736235 | 13.4511717 |
| cg06739774 | 0.03159736 | 6.5763E+12 | 13.4918536 | 3.21E+24   |
| cg01161216 | 0.03159861 | 23879459.6 | 4.47115128 | 1.2754E+14 |
| cg26752003 | 0.03159974 | 413.664546 | 1.70081934 | 100609.367 |
| cg18815565 | 0.03160521 | 5.63817001 | 1.16463816 | 27.2951396 |
| cg07832245 | 0.03160802 | 0.18872194 | 0.04125239 | 0.86336749 |
| cg00324161 | 0.03160845 | 5.59564039 | 1.16382651 | 26.9036588 |
| cg05768582 | 0.03160865 | 46525.3474 | 2.57771778 | 839738146  |
| cg11861043 | 0.03160909 | 3.16E-08   | 4.57E-15   | 0.21838752 |
| cg13136677 | 0.03161011 | 25412.1144 | 2.44377229 | 264253572  |
| cg23306295 | 0.03161524 | 8552514.28 | 4.07840398 | 1.7935E+13 |
| cg06055013 | 0.03162157 | 7.57730782 | 1.19516157 | 48.0400266 |
| cg04987149 | 0.03162538 | 74770941.1 | 4.93162929 | 1.1336E+15 |
| cg17143179 | 0.03162776 | 10.2997067 | 1.2278033  | 86.4014286 |
| cg01868762 | 0.03162952 | 777717.451 | 3.29866391 | 1.8336E+11 |
| cg07935287 | 0.03163535 | 100156.533 | 2.75332467 | 3643352065 |
| cg23739036 | 0.03163542 | 9.76E-08   | 3.94E-14   | 0.24174683 |
| cg24569831 | 0.03163593 | 7.49413883 | 1.1938161  | 47.0441947 |

|            |            |            |            |            |
|------------|------------|------------|------------|------------|
| cg02014690 | 0.03163768 | 7248.10537 | 2.18522147 | 24041055.9 |
| cg16463733 | 0.03163968 | 42140.2641 | 2.55081619 | 696170059  |
| cg01678634 | 0.03164254 | 503237325  | 5.82195877 | 4.3499E+16 |
| cg06434428 | 0.03164432 | 21.859262  | 1.31150336 | 364.33558  |
| cg13732201 | 0.03164551 | 0.16848794 | 0.03319909 | 0.85508915 |
| cg04551092 | 0.03164633 | 226.18344  | 1.61049342 | 31766.0089 |
| cg12262378 | 0.03164985 | 8.39777659 | 1.20563923 | 58.4939921 |
| cg13285458 | 0.03165137 | 2270.15477 | 1.97201069 | 2613374.6  |
| cg06571407 | 0.03165564 | 3.39924048 | 1.11347999 | 10.3772281 |
| cg17495719 | 0.03165663 | 4.13361215 | 1.13277035 | 15.0840366 |
| cg00393798 | 0.03167301 | 6.39075369 | 1.17677549 | 34.7064782 |
| cg18565264 | 0.03167397 | 15.044765  | 1.26858308 | 178.423438 |
| cg09462445 | 0.03168425 | 3.8441822  | 1.12534592 | 13.1317282 |
| cg08454455 | 0.03168831 | 4.39208708 | 1.13853638 | 16.9431818 |
| cg26593267 | 0.03169474 | 5.09339762 | 1.15335598 | 22.4932284 |
| cg12886812 | 0.0316968  | 35355242.1 | 4.58644805 | 2.7254E+14 |
| cg16855355 | 0.03169834 | 6.82924676 | 1.18334069 | 39.4126659 |
| cg18989709 | 0.03170529 | 4.99063895 | 1.15119324 | 21.6353573 |
| cg00445566 | 0.03171427 | 2769697.11 | 3.6639804  | 2.0937E+12 |
| cg09886849 | 0.03171563 | 0.11418627 | 0.01576576 | 0.82701416 |
| cg01553935 | 0.0317391  | 24.8408527 | 1.32417053 | 466.003395 |
| cg23061725 | 0.03175406 | 5.35128892 | 1.15774345 | 24.7345758 |
| cg11196848 | 0.03175432 | 6.33519681 | 1.17493075 | 34.1592205 |
| cg16791424 | 0.03175559 | 5.54303508 | 1.16129184 | 26.4578092 |
| cg18104645 | 0.03175707 | 3.08894318 | 1.1034803  | 8.64679685 |
| cg15204874 | 0.03176063 | 7.32928394 | 1.18990079 | 45.1452789 |
| cg10116178 | 0.03176639 | 0.175107   | 0.0356973  | 0.8589574  |
| cg06685766 | 0.03176899 | 594017.426 | 3.18958338 | 1.1063E+11 |
| cg20814026 | 0.03177415 | 9.09503973 | 1.21233963 | 68.231497  |
| cg26512283 | 0.03177524 | 75.2589203 | 1.4576634  | 3885.60559 |



|            |            |            |            |            |
|------------|------------|------------|------------|------------|
| cg22005145 | 0.03178333 | 5.10378102 | 1.15267178 | 22.598437  |
| cg22492099 | 0.03178507 | 52.9232678 | 1.41328956 | 1981.81063 |
| cg17507671 | 0.03178701 | 6.13638707 | 1.17129271 | 32.1484511 |
| cg24718163 | 0.03179302 | 598086.997 | 3.18604052 | 1.1227E+11 |
| cg22471112 | 0.03179844 | 13.2032455 | 1.25197971 | 139.240031 |
| cg03549146 | 0.03179847 | 0.03464182 | 0.00160836 | 0.74613552 |
| cg24843003 | 0.03180604 | 9.02802274 | 1.21110392 | 67.2982665 |
| cg08319238 | 0.03180879 | 1907.94438 | 1.92981213 | 1886324.43 |
| cg10805447 | 0.03181509 | 417001881  | 5.62263371 | 3.0927E+16 |
| cg18009496 | 0.03182061 | 3.3265597  | 1.11019045 | 9.96765865 |
| cg09436823 | 0.03182185 | 0.05558726 | 0.00397274 | 0.77778564 |
| cg11675148 | 0.03184226 | 9.1442E+10 | 8.95394125 | 9.34E+20   |
| cg20146536 | 0.03184353 | 5.44181818 | 1.15850262 | 25.5617766 |
| cg02451122 | 0.03184853 | 1620058.44 | 3.46028698 | 7.5849E+11 |
| cg15822350 | 0.03187015 | 16374.8902 | 2.31947257 | 115602587  |
| cg15755406 | 0.03187428 | 1248568.25 | 3.37639715 | 4.6171E+11 |
| cg16443152 | 0.03187432 | 55532876.3 | 4.69155573 | 6.5733E+14 |
| cg26034516 | 0.03187706 | 3.76978227 | 1.12188446 | 12.6673101 |
| cg11993436 | 0.0318802  | 2134.09902 | 1.9430334  | 2343952.82 |
| cg18632220 | 0.03188047 | 0.13512018 | 0.02171517 | 0.84076996 |
| cg08278892 | 0.03188157 | 6.2016989  | 1.17129471 | 32.8363723 |
| cg10542362 | 0.03189259 | 279.14779  | 1.62844339 | 47851.5182 |
| cg17428185 | 0.03189285 | 29.6684321 | 1.34114803 | 656.315216 |
| cg05993512 | 0.03189451 | 4.08E-06   | 4.87E-11   | 0.34152206 |
| cg01629007 | 0.03189627 | 7.57075702 | 1.1915248  | 48.1033729 |
| cg19618984 | 0.03190285 | 9.10002435 | 1.21055996 | 68.4067255 |
| cg07915528 | 0.03190393 | 70.9520474 | 1.44595229 | 3481.57616 |
| cg25518519 | 0.03190511 | 8018754785 | 7.19260773 | 8.9398E+18 |
| cg02670133 | 0.0319085  | 2120420997 | 6.40822245 | 7.0163E+17 |
| cg04876124 | 0.03191763 | 0.1973634  | 0.04481863 | 0.86910988 |

|            |            |            |            |            |
|------------|------------|------------|------------|------------|
| cg16512239 | 0.031918   | 754705.874 | 3.22204498 | 1.7678E+11 |
| cg25083496 | 0.03192691 | 7.6536E+13 | 15.8341727 | 3.70E+26   |
| cg04451175 | 0.03192763 | 6.78524425 | 1.17990162 | 39.0198123 |
| cg06971096 | 0.03192936 | 0.2089238  | 0.04997139 | 0.87348288 |
| cg09065658 | 0.03195233 | 31854.0144 | 2.44609166 | 414816112  |
| cg11897736 | 0.0319716  | 0.05074507 | 0.00332917 | 0.77348446 |
| cg23501177 | 0.03197531 | 27.8160015 | 1.33173446 | 580.994155 |
| cg05375405 | 0.03197624 | 162821.018 | 2.81146665 | 9429485444 |
| cg10580282 | 0.03198288 | 12.8956918 | 1.24627418 | 133.436823 |
| cg23528933 | 0.03199402 | 3554.75686 | 2.02082135 | 6253049.7  |
| cg15320854 | 0.03199538 | 8.19293071 | 1.19836712 | 56.0129799 |
| cg20722436 | 0.03200083 | 3.9446E+10 | 8.15351415 | 1.91E+20   |
| cg05177841 | 0.03200289 | 27723.675  | 2.41031326 | 318880606  |
| cg02866325 | 0.03201079 | 9280.52504 | 2.19297554 | 39274558   |
| cg24309428 | 0.03201294 | 5.16510888 | 1.15155532 | 23.1672324 |
| cg19424078 | 0.03201448 | 4.6883E+12 | 12.2713285 | 1.79E+24   |
| cg02626657 | 0.0320235  | 6.55477234 | 1.17525528 | 36.5580494 |
| cg05819860 | 0.032029   | 250.372539 | 1.60671471 | 39015.27   |
| cg18448361 | 0.03203088 | 4.5151E+10 | 8.21648431 | 2.48E+20   |
| cg08739433 | 0.03203124 | 6.91085633 | 1.18051318 | 40.4569267 |
| cg22878324 | 0.03203155 | 3839873044 | 6.64911717 | 2.2175E+18 |
| cg25043378 | 0.03203714 | 38.2861348 | 1.36725272 | 1072.09742 |
| cg00836119 | 0.03203889 | 347936.837 | 2.98877163 | 4.0505E+10 |
| cg09421020 | 0.03204014 | 47241.7475 | 2.51798438 | 886336996  |
| cg18581950 | 0.03204225 | 7.62421465 | 1.19036908 | 48.8324588 |
| cg05240381 | 0.03204318 | 2969278.11 | 3.59122737 | 2.455E+12  |
| cg05396397 | 0.03205534 | 7.25888012 | 1.18520153 | 44.4577056 |
| cg09205065 | 0.03205869 | 7590718.6  | 3.88725587 | 1.4823E+13 |
| cg01947949 | 0.03206583 | 168.094761 | 1.5511237  | 18216.3735 |
| cg07562483 | 0.03207325 | 7.22666588 | 1.18452666 | 44.0890876 |

|            |            |            |            |            |
|------------|------------|------------|------------|------------|
| cg11844827 | 0.03207542 | 3.0422E+11 | 9.6181735  | 9.62E+21   |
| cg14679255 | 0.03207692 | 7.36766386 | 1.18644174 | 45.7523274 |
| cg17296166 | 0.03208119 | 6.6292071  | 1.17571288 | 37.3785024 |
| cg17701073 | 0.03210296 | 30.1039811 | 1.33773662 | 677.450005 |
| cg23511157 | 0.032107   | 9.09007844 | 1.20754523 | 68.4276864 |
| cg02067983 | 0.03210822 | 7.68723772 | 1.19035798 | 49.6435733 |
| cg16438182 | 0.0321126  | 13.950748  | 1.25246143 | 155.392706 |
| cg02106682 | 0.03211343 | 7.91956371 | 1.19332161 | 52.5587478 |
| cg14950855 | 0.03211613 | 187200.052 | 2.81986738 | 1.2427E+10 |
| cg04569641 | 0.03211851 | 0.24497969 | 0.06767335 | 0.88683428 |
| cg09673444 | 0.03212775 | 67917.7149 | 2.58421535 | 1784996746 |
| cg10287032 | 0.03213547 | 4.87852547 | 1.14473685 | 20.7908139 |
| cg07816439 | 0.03214107 | 30.6791042 | 1.33897323 | 702.932225 |
| cg10713002 | 0.03214691 | 104.317252 | 1.48602954 | 7322.92914 |
| cg14839257 | 0.0321476  | 10.6976834 | 1.22383846 | 93.5094244 |
| cg07640390 | 0.03215184 | 34287.5835 | 2.43454307 | 482898986  |
| cg14176626 | 0.03215792 | 6.08952177 | 1.16634025 | 31.7937029 |
| cg01799338 | 0.03216163 | 323.242678 | 1.63566583 | 63879.6918 |
| cg07350057 | 0.03216739 | 6.89842142 | 1.17868193 | 40.3740965 |
| cg03773789 | 0.03216801 | 640.327183 | 1.73332172 | 236550.951 |
| cg25512537 | 0.03216895 | 17.0794114 | 1.27321338 | 229.110295 |
| cg03047121 | 0.03217493 | 30.2283931 | 1.33646509 | 683.710896 |
| cg11799329 | 0.03217669 | 302.575044 | 1.62574589 | 56313.633  |
| cg21236845 | 0.03218341 | 36.1253025 | 1.35666483 | 961.945396 |
| cg09310612 | 0.03218355 | 116978.463 | 2.69758924 | 5072662893 |
| cg06911354 | 0.03218428 | 3.74809966 | 1.11890413 | 12.5553661 |
| cg15822328 | 0.032197   | 27.2205564 | 1.32408745 | 559.599511 |
| cg22334879 | 0.03219966 | 11.7864161 | 1.23314834 | 112.654415 |
| cg07840972 | 0.03221421 | 4341.29935 | 2.03582188 | 9257627.22 |
| cg02328440 | 0.03222211 | 7.98250822 | 1.1926979  | 53.4254632 |

|            |            |            |            |            |
|------------|------------|------------|------------|------------|
| cg01731920 | 0.03223132 | 16.0600418 | 1.26539814 | 203.829084 |
| cg10297426 | 0.03223352 | 0.13768551 | 0.02242716 | 0.84528296 |
| cg08730245 | 0.03224427 | 0.03475046 | 0.00160518 | 0.75231207 |
| cg07500501 | 0.03224955 | 10068501.8 | 3.91793759 | 2.5875E+13 |
| cg05406678 | 0.03225051 | 7.50551337 | 1.18611979 | 47.4932897 |
| cg22663372 | 0.03225104 | 7.47816331 | 1.18574649 | 47.1626329 |
| cg06289967 | 0.03225295 | 1498052.46 | 3.33328999 | 6.7326E+11 |
| cg10006979 | 0.03225514 | 4.49069115 | 1.13559338 | 17.7583873 |
| cg08854306 | 0.03225969 | 1978.80918 | 1.9010081  | 2059794.36 |
| cg03185843 | 0.03226235 | 65.1968618 | 1.42402477 | 2984.94161 |
| cg16903510 | 0.03226435 | 392250.566 | 2.97345151 | 5.1745E+10 |
| cg01946401 | 0.0322651  | 4.88960803 | 1.14370872 | 20.904157  |
| cg09718640 | 0.03227188 | 429116.696 | 2.99458644 | 6.1491E+10 |
| cg14904363 | 0.03227388 | 10.152961  | 1.21650822 | 84.7364742 |
| cg03366850 | 0.03228146 | 5.57575821 | 1.15631366 | 26.8863724 |
| cg27307781 | 0.03228182 | 14.0484467 | 1.25023706 | 157.857146 |
| cg26379859 | 0.03228271 | 3.44190864 | 1.11010826 | 10.6716935 |
| cg13976657 | 0.03228408 | 4.15920429 | 1.12799853 | 15.3359954 |
| cg27331241 | 0.03228512 | 2.89914875 | 1.09410987 | 7.68210183 |
| cg11926764 | 0.03229043 | 27442.7868 | 2.37090018 | 317645828  |
| cg27298559 | 0.03229219 | 1190589252 | 5.84176055 | 2.4265E+17 |
| cg23627444 | 0.03229803 | 4459.7093  | 2.03286903 | 9783712.95 |
| cg07131742 | 0.03230045 | 191.598195 | 1.55837513 | 23556.5029 |
| cg00911719 | 0.0323012  | 5428756.27 | 3.70249658 | 7.9599E+12 |
| cg17426063 | 0.03231562 | 38.4698111 | 1.36045198 | 1087.81962 |
| cg03478631 | 0.03231574 | 895.493383 | 1.77404338 | 452022.993 |
| cg05483534 | 0.03232557 | 18.7540168 | 1.28026838 | 274.718295 |
| cg03196669 | 0.03232739 | 0.02321996 | 0.00074035 | 0.72825694 |
| cg04992603 | 0.03233031 | 687.122014 | 1.73398082 | 272284.823 |
| cg07850154 | 0.03233296 | 8.9076134  | 1.20229801 | 65.9949327 |

|            |            |            |            |            |
|------------|------------|------------|------------|------------|
| cg24498692 | 0.03233402 | 0.11713839 | 0.01643805 | 0.83473434 |
| cg21527078 | 0.03233784 | 0.16546454 | 0.03185734 | 0.85940996 |
| cg08728129 | 0.03233825 | 19.2657468 | 1.28292166 | 289.315406 |
| cg14517217 | 0.03233873 | 2.84991936 | 1.09220269 | 7.43638562 |
| cg21578906 | 0.03233885 | 0.15480607 | 0.02804185 | 0.85461279 |
| cg01468567 | 0.03234394 | 6.51512665 | 1.17090363 | 36.2513826 |
| cg02608453 | 0.03235393 | 0.04434408 | 0.00255575 | 0.76940259 |
| cg11832221 | 0.0323558  | 30719.6166 | 2.38504867 | 395671105  |
| cg15614730 | 0.03236124 | 0.19384233 | 0.04313393 | 0.87112048 |
| cg23609905 | 0.03236284 | 219961.431 | 2.81331063 | 1.7198E+10 |
| cg07394347 | 0.0323762  | 489788.982 | 3.00641435 | 7.9794E+10 |
| cg10356463 | 0.03237625 | 0.00018818 | 7.28E-08   | 0.48641498 |
| cg18307957 | 0.03237802 | 6949.75768 | 2.10255787 | 22971606.3 |
| cg00506935 | 0.03238452 | 27.084544  | 1.31919104 | 556.077552 |
| cg23371050 | 0.03238827 | 229.446212 | 1.57827594 | 33356.3751 |
| cg03555914 | 0.03239117 | 159.264145 | 1.53051492 | 16572.8982 |
| cg12953420 | 0.03239785 | 7.30001807 | 1.18149973 | 45.1039153 |
| cg16315376 | 0.03239958 | 4.98160398 | 1.14420414 | 21.688768  |
| cg25285433 | 0.03241212 | 7.9059667  | 1.18924528 | 52.557963  |
| cg14896516 | 0.0324184  | 0.15758983 | 0.02899327 | 0.85656268 |
| cg26069745 | 0.03241942 | 7.53909683 | 1.18442547 | 47.9878072 |
| cg16604243 | 0.03242516 | 3.22464036 | 1.10303315 | 9.4270108  |
| cg10224098 | 0.03242697 | 3.14652611 | 1.10075788 | 8.99437266 |
| cg20802616 | 0.03242704 | 5.1972314  | 1.14800389 | 23.5288524 |
| cg10091265 | 0.03242778 | 14.4797646 | 1.25084964 | 167.616936 |
| cg12282391 | 0.03242881 | 6.9649018  | 1.1764765  | 41.2331712 |
| cg01184591 | 0.03242935 | 0.09103676 | 0.01012938 | 0.81818371 |
| cg03184776 | 0.03243127 | 6.21759338 | 1.16532027 | 33.1741139 |
| cg03340649 | 0.03243558 | 4.0097598  | 1.12326382 | 14.3137999 |
| cg12837296 | 0.03244124 | 1628.88653 | 1.85670625 | 1429020.52 |

|            |            |            |            |            |
|------------|------------|------------|------------|------------|
| cg13390441 | 0.03244879 | 10.4786667 | 1.21710943 | 90.2157634 |
| cg27557378 | 0.03245078 | 5.33862043 | 1.15034538 | 24.7759227 |
| cg08599266 | 0.0324547  | 200422182  | 4.94360913 | 8.1255E+15 |
| cg05768041 | 0.03246    | 1038.5728  | 1.78685808 | 603648.091 |
| cg08651517 | 0.0324683  | 6.32582356 | 1.1665837  | 34.3019053 |
| cg20170831 | 0.03246904 | 6.43555473 | 1.16825215 | 35.4515628 |
| cg26687072 | 0.0324772  | 8.86107453 | 1.19976807 | 65.4448502 |
| cg00568384 | 0.03248514 | 4.5921031  | 1.13563227 | 18.5688725 |
| cg06313718 | 0.03248646 | 101.907495 | 1.47078484 | 7060.94948 |
| cg22059438 | 0.0324895  | 5.38407797 | 1.15076463 | 25.1904645 |
| cg03969182 | 0.03249239 | 12.7930071 | 1.2368657  | 132.31916  |
| cg00630249 | 0.03249288 | 318365737  | 5.11834464 | 1.9803E+16 |
| cg16093048 | 0.03249563 | 72.2923275 | 1.42895354 | 3657.34816 |
| cg13787932 | 0.03250586 | 6.1731041  | 1.16378413 | 32.7442291 |
| cg04035031 | 0.03250672 | 2.7956E+10 | 7.42086066 | 1.05E+20   |
| cg06427816 | 0.0325079  | 9.28010142 | 1.20396945 | 71.5302889 |
| cg12224388 | 0.03250845 | 0.24165675 | 0.06573358 | 0.88840416 |
| cg05800561 | 0.03251442 | 5.80537581 | 1.15775117 | 29.1102176 |
| cg27540841 | 0.03251527 | 21561279.1 | 4.08082956 | 1.1392E+14 |
| cg04360557 | 0.03251669 | 125045.978 | 2.65733159 | 5884285063 |
| cg20535715 | 0.03252841 | 1612248950 | 5.83654452 | 4.4536E+17 |
| cg04562491 | 0.03252924 | 19.9522918 | 1.28282525 | 310.325937 |
| cg22598028 | 0.03253676 | 3.71869983 | 1.11541741 | 12.3978058 |
| cg09422355 | 0.03253677 | 0.14613514 | 0.02505957 | 0.8521884  |
| cg20065905 | 0.03253762 | 57.825909  | 1.40133372 | 2386.1809  |
| cg25246158 | 0.03253921 | 1147.11131 | 1.79645812 | 732477.054 |
| cg21404792 | 0.03253923 | 2.33E-07   | 1.94E-13   | 0.28089327 |
| cg00776327 | 0.03254944 | 207281.591 | 2.76569163 | 1.5535E+10 |
| cg16184803 | 0.03255258 | 10.6810172 | 1.21747536 | 93.7054919 |
| cg27303986 | 0.03256356 | 765450.575 | 3.07972537 | 1.9025E+11 |

|            |            |            |            |            |
|------------|------------|------------|------------|------------|
| cg22448930 | 0.03256628 | 3.895E+12  | 11.0954767 | 1.37E+24   |
| cg18831134 | 0.03256711 | 4.95827439 | 1.14213326 | 21.5250582 |
| cg27576694 | 0.03256947 | 5.72007208 | 1.15573853 | 28.3102309 |
| cg03943115 | 0.03257403 | 8.76856277 | 1.19738693 | 64.2129051 |
| cg05719612 | 0.03257463 | 6.44125207 | 1.16712521 | 35.5486523 |
| cg04117301 | 0.03257705 | 863.047567 | 1.75208464 | 425122.787 |
| cg19710451 | 0.03257783 | 9.1419863  | 1.20148395 | 69.5605741 |
| cg02372889 | 0.03258161 | 6.81371254 | 1.1724984  | 39.5963685 |
| cg01352090 | 0.03258618 | 8.48670991 | 1.19398167 | 60.3227394 |
| cg15134649 | 0.03259361 | 5.45205197 | 1.15089589 | 25.8275931 |
| cg08721931 | 0.03259435 | 26.3591562 | 1.31142013 | 529.811235 |
| cg12502759 | 0.03259765 | 278467992  | 5.00735026 | 1.5486E+16 |
| cg19097500 | 0.0326055  | 29.7081298 | 1.32421789 | 666.486221 |
| cg13809748 | 0.03261531 | 6945254.34 | 3.68266874 | 1.3098E+13 |
| cg10482632 | 0.03262874 | 17.3238223 | 1.26593765 | 237.069195 |
| cg11632438 | 0.03263101 | 10.1026193 | 1.21069745 | 84.3009265 |
| cg13199010 | 0.03263444 | 41.1758183 | 1.35972704 | 1246.90321 |
| cg18457249 | 0.03263806 | 1686652.2  | 3.27002198 | 8.6996E+11 |
| cg22395490 | 0.03264138 | 5.84855769 | 1.15709567 | 29.5616239 |
| cg01905111 | 0.0326427  | 312297.733 | 2.84375385 | 3.4296E+10 |
| cg27227156 | 0.03264612 | 9.99707611 | 1.20942481 | 82.6355882 |
| cg06499652 | 0.03264842 | 2532.54763 | 1.91010132 | 3357831.04 |
| cg11154879 | 0.03265659 | 6.65048097 | 1.16926649 | 37.8261907 |
| cg13621317 | 0.03265784 | 5.06453849 | 1.14325732 | 22.4355003 |
| cg05241277 | 0.0326622  | 0.14189858 | 0.02365494 | 0.85120526 |
| cg19389852 | 0.03267361 | 0.01273515 | 0.0002324  | 0.69785971 |
| cg18252633 | 0.03267467 | 4.96659023 | 1.14125382 | 21.6139636 |
| cg27194187 | 0.03267988 | 829288797  | 5.43254063 | 1.2659E+17 |
| cg01527459 | 0.03268512 | 3.51364657 | 1.10907681 | 11.1315214 |
| cg00224202 | 0.03268802 | 7.96560023 | 1.18640245 | 53.4816723 |

|            |            |            |            |            |
|------------|------------|------------|------------|------------|
| cg21235989 | 0.03270197 | 17535576   | 3.94583145 | 7.7929E+13 |
| cg09781028 | 0.03270282 | 6.15423043 | 1.16129227 | 32.6141431 |
| cg24834740 | 0.03270409 | 5.44443658 | 1.14962721 | 25.7839144 |
| cg14202186 | 0.03270704 | 112.471438 | 1.47480908 | 8577.26236 |
| cg12817389 | 0.03271254 | 12.5399757 | 1.23118454 | 127.723332 |
| cg16400495 | 0.03271505 | 5.20907513 | 1.14534526 | 23.6910779 |
| cg09503975 | 0.03271596 | 18513.7082 | 2.24325617 | 152794583  |
| cg17574958 | 0.03272361 | 0.14631841 | 0.02507232 | 0.85389297 |
| cg26723570 | 0.03272563 | 1778.65053 | 1.84952937 | 1710487.96 |
| cg19570723 | 0.03272782 | 4367.60513 | 1.99103207 | 9580947.89 |
| cg25528940 | 0.03273486 | 404892.288 | 2.88725054 | 5.678E+10  |
| cg26329692 | 0.03273595 | 46929.9866 | 2.41880609 | 910541630  |
| cg22800400 | 0.03274084 | 7.21772366 | 1.17615971 | 44.292909  |
| cg25074751 | 0.03274433 | 5.15660985 | 1.1441029  | 23.241463  |
| cg13835114 | 0.03274464 | 29.2501717 | 1.31924518 | 648.531871 |
| cg14037250 | 0.032751   | 197.72409  | 1.54298359 | 25337.156  |
| cg17980610 | 0.03275134 | 16.1858639 | 1.25658383 | 208.487634 |
| cg11846968 | 0.03275443 | 0.20918243 | 0.04974851 | 0.8795699  |
| cg05296818 | 0.03275786 | 15.4807358 | 1.25188289 | 191.434186 |
| cg26574895 | 0.03275908 | 16697.2082 | 2.21938423 | 125618971  |
| cg23371754 | 0.03276602 | 5.25872281 | 1.14572847 | 24.1367535 |
| cg10185013 | 0.03277051 | 83.9206907 | 1.4375746  | 4899.00303 |
| cg09043226 | 0.03277059 | 325.860643 | 1.6065783  | 66093.9827 |
| cg12385643 | 0.03277544 | 7.87063711 | 1.1841058  | 52.3153664 |
| cg00658161 | 0.03277632 | 0.02261272 | 0.00069741 | 0.73318866 |
| cg26924012 | 0.03277712 | 19.4006431 | 1.2748857  | 295.230351 |
| cg18116600 | 0.03278165 | 144.994453 | 1.5030091  | 13987.5343 |
| cg06769202 | 0.03278707 | 5.39485777 | 1.14791659 | 25.3541857 |
| cg18123911 | 0.03278975 | 24080956.8 | 4.01849381 | 1.4431E+14 |
| cg26879059 | 0.03279155 | 309.179675 | 1.59866498 | 59794.9365 |



|            |            |            |            |            |
|------------|------------|------------|------------|------------|
| cg18378494 | 0.03280078 | 86.6152576 | 1.44027817 | 5208.8569  |
| cg11849105 | 0.03280151 | 7671.95357 | 2.07812877 | 28323014.6 |
| cg05367052 | 0.03280933 | 5059.74966 | 2.00788028 | 12750295.4 |
| cg25753841 | 0.03280992 | 366480.221 | 2.84925586 | 4.7138E+10 |
| cg04167018 | 0.03282315 | 225770302  | 4.80990233 | 1.0597E+16 |
| cg08474467 | 0.03282552 | 0.0504918  | 0.00325324 | 0.78365504 |
| cg04480386 | 0.03282592 | 3.75749162 | 1.11413072 | 12.6724298 |
| cg05048168 | 0.03282844 | 8652.18105 | 2.09596852 | 35716298.4 |
| cg08145698 | 0.03283003 | 6.18037555 | 1.16028157 | 32.9204935 |
| cg22001110 | 0.03283027 | 3328.29422 | 1.93857495 | 5714270.89 |
| cg10109500 | 0.03283038 | 4.23750233 | 1.12508191 | 15.9601055 |
| cg19276111 | 0.0328326  | 6.69178069 | 1.16780498 | 38.3453828 |
| cg18043598 | 0.03283685 | 85698519.7 | 4.4382556  | 1.6548E+15 |
| cg07404418 | 0.03283737 | 1746.60211 | 1.83867875 | 1659136.45 |
| cg00401745 | 0.03283954 | 4.01535734 | 1.12007309 | 14.3946808 |
| cg12526849 | 0.03284663 | 19.3940363 | 1.27346882 | 295.35756  |
| cg07204255 | 0.03285066 | 3.37103098 | 1.10412754 | 10.2921533 |
| cg23191024 | 0.03285156 | 2210.51126 | 1.87327738 | 2608455.15 |
| cg04383128 | 0.03285171 | 0.14412769 | 0.02432556 | 0.85394925 |
| cg16467656 | 0.03285481 | 708.154956 | 1.70709957 | 293763.44  |
| cg06550200 | 0.03285577 | 19.2675589 | 1.27260864 | 291.714839 |
| cg07517487 | 0.03285963 | 175.028392 | 1.52312508 | 20113.2122 |
| cg00672333 | 0.03287738 | 58.7354527 | 1.39296117 | 2476.63287 |
| cg21505923 | 0.0328781  | 12.5547536 | 1.2285931  | 128.294582 |
| cg04645049 | 0.03288581 | 2971.28408 | 1.91622602 | 4607248.29 |
| cg14611399 | 0.03288624 | 4.94904952 | 1.1388914  | 21.5060813 |
| cg12560320 | 0.03289643 | 0.00527326 | 4.26E-05   | 0.65293352 |
| cg15456476 | 0.03290028 | 32.2849512 | 1.32619955 | 785.943617 |
| cg25388707 | 0.03290058 | 17214.2906 | 2.2088513  | 134156519  |
| cg11972708 | 0.03290339 | 2910609.49 | 3.35045797 | 2.5285E+12 |

|            |            |            |            |            |
|------------|------------|------------|------------|------------|
| cg18267049 | 0.03290346 | 4.83662082 | 1.13660291 | 20.5814191 |
| cg23986385 | 0.03291959 | 24196594.5 | 3.97368754 | 1.4734E+14 |
| cg03308628 | 0.03292638 | 10.2800405 | 1.20805736 | 87.4786539 |
| cg03079754 | 0.03292873 | 5.99414708 | 1.15631319 | 31.0727228 |
| cg26898605 | 0.03293265 | 11.0893616 | 1.21540998 | 101.17898  |
| cg16353345 | 0.03293549 | 3667526246 | 5.96146189 | 2.2563E+18 |
| cg21940313 | 0.03294733 | 16.2918359 | 1.2536468  | 211.721448 |
| cg02497558 | 0.03294953 | 6.05929603 | 1.15709969 | 31.7302551 |
| cg27536453 | 0.03294962 | 5.74072585 | 1.15204834 | 28.6063806 |
| cg10457563 | 0.03295015 | 10.2063662 | 1.2070028  | 86.3046151 |
| cg24960947 | 0.03295141 | 3.2314139  | 1.09964434 | 9.49583011 |
| cg15899747 | 0.03295529 | 1068101.74 | 3.07676009 | 3.7079E+11 |
| cg22831269 | 0.03295558 | 37562.7441 | 2.34624389 | 601369598  |
| cg10054857 | 0.03295785 | 0.23578962 | 0.06249469 | 0.88962352 |
| cg24363811 | 0.03296063 | 1946042.93 | 3.22857862 | 1.173E+12  |
| cg04280397 | 0.03296094 | 31.2151348 | 1.32112454 | 737.54185  |
| cg04896048 | 0.03296472 | 0.20546125 | 0.04798099 | 0.8798136  |
| cg26818820 | 0.03296795 | 8.59948184 | 1.19013287 | 62.1368334 |
| cg03247626 | 0.03297983 | 652656.647 | 2.95137566 | 1.4433E+11 |
| cg01459033 | 0.03298149 | 1000768.36 | 3.05477334 | 3.2786E+11 |
| cg13075951 | 0.03298181 | 0.17481999 | 0.03518834 | 0.8685272  |
| cg22290047 | 0.03298361 | 257049.157 | 2.73656726 | 2.4145E+10 |
| cg06787669 | 0.03298686 | 6.06321607 | 1.15675185 | 31.7808778 |
| cg25261331 | 0.03299025 | 0.04436755 | 0.00253175 | 0.7775186  |
| cg08301503 | 0.03299195 | 4.82260237 | 1.13550475 | 20.4820752 |
| cg01490772 | 0.03299961 | 113.590038 | 1.46530561 | 8805.46468 |
| cg23318893 | 0.03300132 | 7.41421727 | 1.1755276  | 46.7625073 |
| cg06191203 | 0.03300315 | 215.855803 | 1.54310097 | 30194.8664 |
| cg26229968 | 0.03300879 | 2028.23028 | 1.84852448 | 2225406.34 |
| cg01869405 | 0.03301408 | 2445523.46 | 3.27529398 | 1.826E+12  |

|            |            |            |            |            |
|------------|------------|------------|------------|------------|
| cg11404945 | 0.03301543 | 31.1487526 | 1.31959889 | 735.257355 |
| cg10165801 | 0.03301613 | 4.42508831 | 1.12742974 | 17.3681835 |
| cg07489950 | 0.03301802 | 7464.19762 | 2.05254668 | 27143960.6 |
| cg11571761 | 0.03301818 | 156.993198 | 1.50335046 | 16394.623  |
| cg19046253 | 0.03302318 | 31.6568155 | 1.32113635 | 758.554533 |
| cg06984883 | 0.03302408 | 71295063.1 | 4.29508712 | 1.1834E+15 |
| cg21037314 | 0.03302433 | 84533.0111 | 2.49529173 | 2863725262 |
| cg00303541 | 0.03303342 | 10.5681503 | 1.20916659 | 92.3659331 |
| cg21793948 | 0.03303885 | 452.306736 | 1.63616632 | 125037.034 |
| cg24425972 | 0.03304258 | 0.17203425 | 0.03410096 | 0.86788709 |
| cg07141055 | 0.03305062 | 15.9465306 | 1.24959665 | 203.499135 |
| cg14046757 | 0.0330552  | 1.9645E+12 | 9.74662382 | 3.96E+23   |
| cg13284574 | 0.03305564 | 5.84043117 | 1.15252443 | 29.5964539 |
| cg04898211 | 0.03305591 | 1558.04172 | 1.80632242 | 1343887.44 |
| cg12910906 | 0.0330761  | 10.4109316 | 1.20707474 | 89.7935253 |
| cg22205015 | 0.03307735 | 302.676043 | 1.58226389 | 57899.8153 |
| cg22287064 | 0.03307913 | 2.6878963  | 1.08264875 | 6.6732507  |
| cg10113467 | 0.03308036 | 192356216  | 4.62669651 | 7.9973E+15 |
| cg22295573 | 0.03308205 | 5.86428666 | 1.15262018 | 29.836245  |
| cg11995437 | 0.03308882 | 8.39761751 | 1.18624716 | 59.447965  |
| cg11502198 | 0.03308902 | 16.9723944 | 1.25516575 | 229.501301 |
| cg09858237 | 0.03309675 | 7.82737163 | 1.17946978 | 51.94516   |
| cg13459498 | 0.03310205 | 3.6818643  | 1.11018367 | 12.2107045 |
| cg01898246 | 0.03310556 | 329.059865 | 1.59155727 | 68034.2434 |
| cg23128382 | 0.03310973 | 1913.22056 | 1.83249808 | 1997498.92 |
| cg06244417 | 0.03311035 | 0.17704305 | 0.03601008 | 0.87042957 |
| cg21807925 | 0.03312645 | 223528.288 | 2.68100155 | 1.8637E+10 |
| cg08829299 | 0.0331285  | 7.1495354  | 1.17054741 | 43.668335  |
| cg15679098 | 0.03313839 | 88.547003  | 1.43146173 | 5477.31846 |
| cg08081524 | 0.03313907 | 53.6421866 | 1.37517995 | 2092.44194 |

|            |            |            |            |            |
|------------|------------|------------|------------|------------|
| cg19557190 | 0.03313962 | 1.3876E+10 | 6.47660228 | 2.9731E+19 |
| cg04958124 | 0.03314478 | 160065313  | 4.52995443 | 5.6559E+15 |
| cg07017214 | 0.03314964 | 8.03842547 | 1.18130788 | 54.6989358 |
| cg16296724 | 0.03315277 | 878586.608 | 2.9858869  | 2.5852E+11 |
| cg20050012 | 0.0331601  | 265.781296 | 1.56204576 | 45222.553  |
| cg26256999 | 0.03316206 | 29968911.1 | 3.95576019 | 2.2705E+14 |
| cg09323728 | 0.03316928 | 9.20590326 | 1.19391205 | 70.9840015 |
| cg11770080 | 0.03317003 | 4.22818252 | 1.12199391 | 15.9337117 |
| cg25274503 | 0.03317143 | 126.162678 | 1.47135494 | 10817.9345 |
| cg11830695 | 0.03317414 | 6661.41976 | 2.01920958 | 21976180   |
| cg12234455 | 0.03318166 | 12.3048509 | 1.22169431 | 123.933912 |
| cg13503148 | 0.03318347 | 6.61910667 | 1.16271368 | 37.6813088 |
| cg15477139 | 0.03318628 | 0.11660464 | 0.0161385  | 0.84249703 |
| cg08402850 | 0.03319574 | 12.7456723 | 1.22489989 | 132.624848 |
| cg14789568 | 0.0331998  | 746809360  | 5.09368229 | 1.0949E+17 |
| cg17600693 | 0.03321088 | 135543894  | 4.44126164 | 4.1367E+15 |
| cg06467910 | 0.03321164 | 8.74435194 | 1.1884478  | 64.3391244 |
| cg12416929 | 0.03321685 | 234.830363 | 1.54416703 | 35712.004  |
| cg02874569 | 0.03322024 | 5.78845735 | 1.14995474 | 29.1370063 |
| cg24242519 | 0.03322508 | 13.8113274 | 1.23226777 | 154.798145 |
| cg06834434 | 0.0332281  | 1702.46636 | 1.80708904 | 1603900.89 |
| cg18176922 | 0.03323294 | 28.7203333 | 1.30598506 | 631.597994 |
| cg19631443 | 0.03323297 | 8.9618E+11 | 8.91894953 | 9.00E+22   |
| cg08828868 | 0.03323583 | 85270.2995 | 2.465841   | 2948699436 |
| cg10383568 | 0.03323689 | 7.71985459 | 1.17639723 | 50.6598908 |
| cg24239961 | 0.03324473 | 10.8421563 | 1.2084719  | 97.2735519 |
| cg13388277 | 0.03324934 | 0.1374672  | 0.02212303 | 0.85418807 |
| cg08216000 | 0.03324978 | 0.05777697 | 0.0041865  | 0.79736684 |
| cg23414001 | 0.03326298 | 0.06178112 | 0.00476057 | 0.8017755  |
| cg09774842 | 0.03326801 | 4.06214817 | 1.11760824 | 14.7646082 |

|            |            |            |            |            |
|------------|------------|------------|------------|------------|
| cg17313042 | 0.03327087 | 93.340394  | 1.4330007  | 6079.84988 |
| cg20902195 | 0.03327175 | 7853818.92 | 3.52223274 | 1.7512E+13 |
| cg11906444 | 0.03327216 | 8.14399608 | 1.18095265 | 56.162008  |
| cg01814945 | 0.0332738  | 11.0058775 | 1.2094709  | 100.150686 |
| cg24716709 | 0.03327651 | 174185.482 | 2.60321976 | 1.1655E+10 |
| cg13766687 | 0.03328107 | 0.06349263 | 0.00501579 | 0.80372532 |
| cg14192174 | 0.03328685 | 8.57847268 | 1.18563479 | 62.06818   |
| cg25982743 | 0.03328941 | 10.3749033 | 1.20359225 | 89.4311339 |
| cg05643490 | 0.03329111 | 16.323311  | 1.24755511 | 213.578126 |
| cg13037201 | 0.03329325 | 4.54567513 | 1.12739813 | 18.3281858 |
| cg10498429 | 0.03329367 | 1809.90854 | 1.81124441 | 1808573.64 |
| cg05750276 | 0.03329423 | 108489268  | 4.32819445 | 2.7194E+15 |
| cg19954000 | 0.03330164 | 9.2555019  | 1.19258669 | 71.8306822 |
| cg27204544 | 0.03330951 | 375.574358 | 1.59837863 | 88249.4895 |
| cg19767052 | 0.0333157  | 67.1070693 | 1.39461213 | 3229.11199 |
| cg00675313 | 0.03331583 | 7.68012335 | 1.17492652 | 50.202539  |
| cg27049761 | 0.03331685 | 4.39062753 | 1.12409892 | 17.1493893 |
| cg01814537 | 0.03331922 | 152770.957 | 2.56943509 | 9083306050 |
| cg13053082 | 0.0333218  | 12.1441396 | 1.21818372 | 121.065587 |
| cg08572782 | 0.03332663 | 20193.3999 | 2.18873288 | 186305694  |
| cg10773698 | 0.03333054 | 8.34477553 | 1.1824706  | 58.8896493 |
| cg27372920 | 0.03333631 | 3.51287048 | 1.1043075  | 11.1746583 |
| cg01105948 | 0.03334057 | 12.6951247 | 1.22215939 | 131.870027 |
| cg20884043 | 0.03334624 | 29.2990839 | 1.30544622 | 657.58076  |
| cg10626682 | 0.03335377 | 0.21384129 | 0.05164445 | 0.88544073 |
| cg14350197 | 0.03335615 | 5.58782972 | 1.14533143 | 27.2618388 |
| cg27326750 | 0.03335639 | 0.03819579 | 0.00188738 | 0.77298806 |
| cg14562523 | 0.03335884 | 10.2340036 | 1.20127604 | 87.1863136 |
| cg21357361 | 0.03336746 | 75.1343537 | 1.40548699 | 4016.5232  |
| cg26853048 | 0.03337168 | 91669705.7 | 4.23929798 | 1.9822E+15 |

|            |            |            |            |            |
|------------|------------|------------|------------|------------|
| cg14250028 | 0.03337175 | 8.26043262 | 1.18098553 | 57.7778012 |
| cg07300976 | 0.03337705 | 1280.06794 | 1.75675997 | 932724.997 |
| cg20910436 | 0.03338148 | 84012392.7 | 4.20633819 | 1.678E+15  |
| cg08933227 | 0.03338229 | 4.60741036 | 1.12780209 | 18.8226555 |
| cg12727940 | 0.03338462 | 11.8822882 | 1.2151001  | 116.195179 |
| cg17141902 | 0.03338693 | 27.5597584 | 1.29824204 | 585.052908 |
| cg16425829 | 0.03339815 | 0.19771129 | 0.0444045  | 0.88031064 |
| cg04943986 | 0.03340552 | 0.00074245 | 9.71E-07   | 0.56755989 |
| cg27274446 | 0.03340853 | 11.8572879 | 1.21452405 | 115.761624 |
| cg18488855 | 0.03340934 | 9.21418197 | 1.19067721 | 71.3049251 |
| cg05812599 | 0.0334138  | 0.17026447 | 0.03331609 | 0.87014978 |
| cg21540749 | 0.03341461 | 4496369.56 | 3.33155986 | 6.0684E+12 |
| cg08887028 | 0.03344858 | 0.04797    | 0.00291964 | 0.78815348 |
| cg20512519 | 0.03345056 | 67446045.3 | 4.10746743 | 1.1075E+15 |
| cg17210546 | 0.03346913 | 86.7799878 | 1.41817892 | 5310.16657 |
| cg23818870 | 0.03347    | 4.46900738 | 1.12432722 | 17.763536  |
| cg13517138 | 0.03347144 | 17931.9639 | 2.15230701 | 149400308  |
| cg21296513 | 0.03347571 | 53498.9206 | 2.34396981 | 1221062871 |
| cg08986653 | 0.03347856 | 0.00791101 | 9.14E-05   | 0.68483521 |
| cg07549195 | 0.03348973 | 2223.35494 | 1.82654365 | 2706372.33 |
| cg13671601 | 0.0334937  | 5.44149852 | 1.14154931 | 25.9383505 |
| cg03076324 | 0.03349492 | 1.4645E+10 | 6.22815125 | 3.4435E+19 |
| cg01711077 | 0.03349637 | 25.5512571 | 1.28814969 | 506.825212 |
| cg24065504 | 0.03350191 | 5.74791103 | 1.14636105 | 28.8203104 |
| cg08911275 | 0.03350218 | 2.97560365 | 1.08889964 | 8.13134361 |
| cg13672444 | 0.03351431 | 111.823539 | 1.44500099 | 8653.63001 |
| cg23426747 | 0.03351818 | 3098379.1  | 3.20951422 | 2.9911E+12 |
| cg16479401 | 0.03352592 | 4.38E-05   | 4.20E-09   | 0.45721843 |
| cg26272575 | 0.03352835 | 26.8866273 | 1.29257849 | 559.262538 |
| cg21880328 | 0.03352963 | 14.0473689 | 1.22876013 | 160.591614 |

|            |            |            |            |            |
|------------|------------|------------|------------|------------|
| cg16257334 | 0.03353046 | 20456.2815 | 2.16798186 | 193017968  |
| cg17004840 | 0.03353371 | 11828.6598 | 2.07702527 | 67364223   |
| cg15147084 | 0.03353437 | 2.0894E+10 | 6.37234495 | 6.85E+19   |
| cg03456872 | 0.03355579 | 1846245613 | 5.26190752 | 6.4779E+17 |
| cg27261378 | 0.03355972 | 2.8269E+12 | 9.30594996 | 8.59E+23   |
| cg27111970 | 0.03357915 | 3.55751543 | 1.10363552 | 11.467478  |
| cg00541350 | 0.03358416 | 9622.93803 | 2.03896827 | 45415584.7 |
| cg16872595 | 0.03359289 | 10.109467  | 1.19673624 | 85.4000402 |
| cg06710890 | 0.03359762 | 0.03222992 | 0.00135609 | 0.76600368 |
| cg26341831 | 0.03359795 | 11.5838516 | 1.20937318 | 110.954683 |
| cg00134776 | 0.03359931 | 5.69648711 | 1.14454686 | 28.3518014 |
| cg02069772 | 0.03362275 | 11.7308529 | 1.21017306 | 113.713413 |
| cg08736088 | 0.03362676 | 7.16535793 | 1.16477666 | 44.0791408 |
| cg19311812 | 0.03363136 | 63.6670573 | 1.37936587 | 2938.66498 |
| cg16267491 | 0.03363403 | 8852188.15 | 3.45003116 | 2.2713E+13 |
| cg01550161 | 0.03363978 | 27.6649008 | 1.29296679 | 591.930699 |
| cg02007493 | 0.03364647 | 161791484  | 4.31504877 | 6.0663E+15 |
| cg06485521 | 0.03364789 | 48.5762607 | 1.35032133 | 1747.47525 |
| cg01425188 | 0.03366409 | 11.1580849 | 1.20486408 | 103.33353  |
| cg03762535 | 0.03366665 | 5.379392   | 1.13880041 | 25.4108252 |
| cg00268086 | 0.03366798 | 4.44792799 | 1.12218472 | 17.6299527 |
| cg11055795 | 0.03367177 | 336567.011 | 2.67182366 | 4.2397E+10 |
| cg22276811 | 0.03367567 | 15.0112652 | 1.23259574 | 182.815886 |
| cg13443371 | 0.03367799 | 564.285304 | 1.63074262 | 195259.448 |
| cg08738562 | 0.03368103 | 605573.081 | 2.79401243 | 1.3125E+11 |
| cg21142512 | 0.0336914  | 26.9898955 | 1.28935734 | 564.974839 |
| cg08979191 | 0.03369229 | 4.63743651 | 1.12558898 | 19.1062793 |
| cg14966496 | 0.03369639 | 3.2623E+12 | 9.2195737  | 1.15E+24   |
| cg24127861 | 0.03370209 | 4.29915414 | 1.11895063 | 16.5179105 |
| cg09013267 | 0.03370859 | 69.9466071 | 1.38708323 | 3527.20567 |

|            |            |            |            |            |
|------------|------------|------------|------------|------------|
| cg18577280 | 0.03371032 | 81.6246822 | 1.40362329 | 4746.70718 |
| cg15603184 | 0.03371045 | 97586.425  | 2.42261785 | 3930917269 |
| cg07411238 | 0.03371306 | 11.7926688 | 1.20926491 | 115.001301 |
| cg27394136 | 0.03371474 | 185.569554 | 1.49510204 | 23032.5814 |
| cg14347989 | 0.03372449 | 40.0401991 | 1.32833636 | 1206.93643 |
| cg26024566 | 0.03372477 | 107.279907 | 1.43298079 | 8031.49526 |
| cg07028533 | 0.03373663 | 3.71514603 | 1.10617111 | 12.4775542 |
| cg15658824 | 0.03374106 | 43.1659781 | 1.33560935 | 1395.09481 |
| cg02036832 | 0.03374377 | 89266447.9 | 4.08309918 | 1.9516E+15 |
| cg16300838 | 0.0337444  | 395.508538 | 1.58334736 | 98795.1274 |
| cg11662322 | 0.03375459 | 1938279.08 | 3.03961704 | 1.236E+12  |
| cg21927946 | 0.03375531 | 8.39206265 | 1.17744764 | 59.8130339 |
| cg13623999 | 0.03375696 | 7.96215654 | 1.17268185 | 54.0606446 |
| cg08098598 | 0.03375846 | 9.09466822 | 1.18469675 | 69.8178584 |
| cg21379008 | 0.03376186 | 301067.433 | 2.63334035 | 3.4421E+10 |
| cg09447457 | 0.033762   | 3.1469E+10 | 6.39355175 | 1.55E+20   |
| cg12473573 | 0.03376741 | 6868338066 | 5.68499554 | 8.298E+18  |
| cg26471467 | 0.03377089 | 1.2218E+10 | 5.93938871 | 2.51E+19   |
| cg20539321 | 0.03377173 | 259451.867 | 2.60178155 | 2.5873E+10 |
| cg08333931 | 0.03378685 | 10.1348448 | 1.19417957 | 86.013094  |
| cg11361387 | 0.03379286 | 16.8474758 | 1.2414913  | 228.626202 |
| cg27639942 | 0.03379734 | 4.51944955 | 1.12243082 | 18.1974906 |
| cg16509355 | 0.0337983  | 7.69437373 | 1.16909397 | 50.6404006 |
| cg06235653 | 0.03380061 | 5.75025711 | 1.14328891 | 28.9213484 |
| cg03211327 | 0.03380757 | 8.4889466  | 1.17780288 | 61.1835953 |
| cg17421417 | 0.0338078  | 5.31461188 | 1.13634352 | 24.8561276 |
| cg17450838 | 0.03380922 | 7.0373E+11 | 8.06157339 | 6.14E+22   |
| cg19351701 | 0.03381617 | 9.5476311  | 1.18832285 | 76.7108532 |
| cg23894219 | 0.03382042 | 4.70677781 | 1.12571803 | 19.6796683 |
| cg06826870 | 0.03382242 | 0.20609107 | 0.04792381 | 0.88627207 |



|            |            |            |            |            |
|------------|------------|------------|------------|------------|
| cg08231603 | 0.0338228  | 4.789E+12  | 9.31635704 | 2.46E+24   |
| cg23905308 | 0.03382339 | 3.3434E+10 | 6.37398156 | 1.75E+20   |
| cg07823935 | 0.0338247  | 0.00015697 | 4.81E-08   | 0.51198227 |
| cg19691267 | 0.0338293  | 238710.645 | 2.57566806 | 2.2123E+10 |
| cg20735720 | 0.03383025 | 9.98096931 | 1.19216308 | 83.5621824 |
| cg03517998 | 0.03383199 | 0.21973445 | 0.05420865 | 0.8906923  |
| cg02536026 | 0.0338381  | 5.59836461 | 1.14056642 | 27.479054  |
| cg25532627 | 0.03384347 | 14.239549  | 1.22474808 | 165.556296 |
| cg26495953 | 0.03384467 | 29.1880671 | 1.29369092 | 658.536945 |
| cg19406914 | 0.03385085 | 17185.0925 | 2.10430419 | 140344445  |
| cg18191873 | 0.03385262 | 234.254523 | 1.51623573 | 36191.7218 |
| cg26211724 | 0.03385273 | 5.64734482 | 1.14117557 | 27.9470613 |
| cg10420952 | 0.03385823 | 7.46286468 | 1.16563448 | 47.7802864 |
| cg10337772 | 0.0338708  | 191594896  | 4.27586849 | 8.5851E+15 |
| cg22817039 | 0.03387301 | 2537296.05 | 3.07515764 | 2.0935E+12 |
| cg21784254 | 0.03387537 | 6.91004345 | 1.15861489 | 41.2118825 |
| cg07477282 | 0.03387668 | 1249.20775 | 1.721212   | 906640.203 |
| cg02452416 | 0.03388065 | 10.4521009 | 1.19563833 | 91.3707859 |
| cg08804892 | 0.03388521 | 10.3206007 | 1.19442038 | 89.1769777 |
| cg26014634 | 0.03388822 | 6.27936467 | 1.15005907 | 34.2855613 |
| cg21627187 | 0.03388834 | 7.00330418 | 1.15964677 | 42.2941456 |
| cg10541755 | 0.03389418 | 3.85301622 | 1.1080528  | 13.3980384 |
| cg26266931 | 0.03389983 | 3.5075E+14 | 12.763716  | 9.64E+27   |
| cg07602841 | 0.03391724 | 4.68385926 | 1.12442672 | 19.5108646 |
| cg24291087 | 0.03391825 | 0.03655968 | 0.00171844 | 0.77780398 |
| cg07059148 | 0.03392468 | 2954911.69 | 3.09868115 | 2.8178E+12 |
| cg08749351 | 0.0339293  | 37.5243075 | 1.31664264 | 1069.44254 |
| cg17767099 | 0.03392945 | 18.1356851 | 1.2459593  | 263.975776 |
| cg00720190 | 0.03394381 | 19935954.8 | 3.57593971 | 1.1114E+14 |
| cg05858889 | 0.03394462 | 4.62273885 | 1.12306186 | 19.0280831 |

|            |            |            |            |            |
|------------|------------|------------|------------|------------|
| cg15553385 | 0.03394709 | 78574.875  | 2.34980314 | 2627458817 |
| cg10210369 | 0.03395192 | 4.62152006 | 1.12297444 | 19.0195315 |
| cg16408081 | 0.03395856 | 19.1208195 | 1.25041463 | 292.387602 |
| cg26257814 | 0.03396219 | 3.34799194 | 1.09580764 | 10.2290307 |
| cg07881863 | 0.03396936 | 244510.048 | 2.55727794 | 2.3378E+10 |
| cg00337957 | 0.03397293 | 8134.36876 | 1.97630996 | 33480555.5 |
| cg00990022 | 0.03398269 | 15.3157052 | 1.22915762 | 190.838685 |
| cg00026327 | 0.03398275 | 12.2343551 | 1.20845677 | 123.859992 |
| cg24869272 | 0.03398658 | 7.75459549 | 1.16745789 | 51.508283  |
| cg13892257 | 0.03400054 | 0.15790928 | 0.02866483 | 0.86989338 |
| cg19658926 | 0.03400301 | 1.2693E+10 | 5.79248016 | 2.7816E+19 |
| cg10635330 | 0.03401527 | 29.3670056 | 1.29043692 | 668.317071 |
| cg06686306 | 0.03401848 | 2.6546E+16 | 17.3288685 | 4.07E+31   |
| cg22397446 | 0.0340205  | 578321698  | 4.57920232 | 7.3038E+16 |
| cg22613968 | 0.03402342 | 8.19979384 | 1.1719246  | 57.3728198 |
| cg25934198 | 0.03403099 | 648.266422 | 1.62889444 | 257996.678 |
| cg10325497 | 0.03404703 | 12.9657233 | 1.21274022 | 138.619943 |
| cg20893919 | 0.03404756 | 22.0061646 | 1.26199828 | 383.733707 |
| cg24425705 | 0.03405401 | 78.0743117 | 1.38801351 | 4391.59856 |
| cg04059461 | 0.03405543 | 10.9771849 | 1.19751139 | 100.624168 |
| cg12482755 | 0.03405829 | 1043104073 | 4.76810802 | 2.282E+17  |
| cg02490260 | 0.0340611  | 902.065137 | 1.66819221 | 487786.423 |
| cg22245862 | 0.03408192 | 0.07641247 | 0.0070827  | 0.82438386 |
| cg14145801 | 0.03408448 | 3.80238337 | 1.10548418 | 13.0785402 |
| cg11214576 | 0.03408924 | 23.583786  | 1.26772961 | 438.733117 |
| cg27369401 | 0.03409652 | 6.4781744  | 1.15047211 | 36.4778452 |
| cg14835423 | 0.03409736 | 1070.5408  | 1.68760642 | 679102.418 |
| cg17891715 | 0.034104   | 58600.962  | 2.27776704 | 1507648802 |
| cg19800427 | 0.03410705 | 5.48014164 | 1.13601696 | 26.4361831 |
| cg04148483 | 0.03410887 | 32532.9756 | 2.17887243 | 485753314  |

|            |            |            |            |            |
|------------|------------|------------|------------|------------|
| cg07782527 | 0.0341111  | 3916.07646 | 1.85895643 | 8249604.24 |
| cg05564117 | 0.03411512 | 11.073567  | 1.19741119 | 102.4075   |
| cg03149565 | 0.03412223 | 0.28884124 | 0.09156063 | 0.91119145 |
| cg25509428 | 0.03412298 | 7197.89984 | 1.9446651  | 26641997.2 |
| cg19527084 | 0.0341243  | 3.69471348 | 1.10280602 | 12.3783399 |
| cg08108362 | 0.03412437 | 226659889  | 4.2230679  | 1.2165E+16 |
| cg23782001 | 0.03413491 | 8.79297692 | 1.17663829 | 65.7096097 |
| cg11993754 | 0.03414355 | 0.01450925 | 0.00028891 | 0.72867005 |
| cg04902856 | 0.03414358 | 555.285286 | 1.60409401 | 192221.745 |
| cg08563839 | 0.03414848 | 0.11434443 | 0.01537557 | 0.85035229 |
| cg22942704 | 0.03414855 | 45.4516844 | 1.33016649 | 1553.08048 |
| cg10103630 | 0.0341515  | 165.138201 | 1.46472439 | 18618.2641 |
| cg22366783 | 0.03415317 | 1.9825E+11 | 6.98595369 | 5.63E+21   |
| cg01763057 | 0.03415944 | 2444.46178 | 1.79095558 | 3336427.48 |
| cg12950012 | 0.03416101 | 139315.559 | 2.42212241 | 8013147800 |
| cg03394422 | 0.03416106 | 8.92211725 | 1.17757484 | 67.6000993 |
| cg14667731 | 0.03416151 | 277891.518 | 2.55022951 | 3.0281E+10 |
| cg02124724 | 0.03417055 | 14.0989542 | 1.21835592 | 163.154711 |
| cg14927519 | 0.03417286 | 5.32438575 | 1.13292033 | 25.0230159 |
| cg21809927 | 0.0341733  | 0.28545551 | 0.08947613 | 0.91068808 |
| cg07616094 | 0.03418394 | 0.18736789 | 0.03977639 | 0.88260206 |
| cg08219107 | 0.0341845  | 621.236664 | 1.61541761 | 238907.259 |
| cg20224517 | 0.03419771 | 21886.5977 | 2.1054183  | 227519234  |
| cg17475304 | 0.0342003  | 23.0595235 | 1.26331784 | 420.908822 |
| cg24383507 | 0.03420163 | 3.77475275 | 1.10399189 | 12.9065787 |
| cg11525834 | 0.03420164 | 2049.51799 | 1.76460409 | 2380434.25 |
| cg24770624 | 0.03420989 | 4.11952625 | 1.11113495 | 15.2731192 |
| cg11601666 | 0.03421247 | 621367.855 | 2.69871527 | 1.4307E+11 |
| cg24539573 | 0.03421969 | 14.9062417 | 1.2225923  | 181.741732 |
| cg04507515 | 0.0342211  | 4.89727661 | 1.12542778 | 21.3104019 |

|            |            |            |            |            |
|------------|------------|------------|------------|------------|
| cg00373148 | 0.03422207 | 26.9399032 | 1.27756562 | 568.079143 |
| cg06508879 | 0.03422542 | 10.6870602 | 1.19261914 | 95.7667471 |
| cg23598419 | 0.03422782 | 4.87273925 | 1.12494568 | 21.1064305 |
| cg26059292 | 0.03422856 | 0.04330355 | 0.00236814 | 0.79184363 |
| cg27201457 | 0.03423566 | 0.15563703 | 0.02781342 | 0.87090623 |
| cg05395366 | 0.03424623 | 1365.29581 | 1.70917534 | 1090603.53 |
| cg26106626 | 0.03424856 | 41130.9234 | 2.20059863 | 768769387  |
| cg02811074 | 0.03425334 | 16.665143  | 1.2321768  | 225.395409 |
| cg27517345 | 0.03425695 | 5.23003133 | 1.13059833 | 24.1935858 |
| cg00478851 | 0.03426517 | 77.521134  | 1.38071055 | 4352.48809 |
| cg11837377 | 0.03426723 | 111630343  | 3.95063304 | 3.1543E+15 |
| cg23530245 | 0.03426851 | 229395.716 | 2.49690136 | 2.1075E+10 |
| cg00653081 | 0.0342817  | 195960.953 | 2.46586801 | 1.5573E+10 |
| cg10079801 | 0.03428347 | 7.4568E+11 | 7.57258648 | 7.34E+22   |
| cg23260573 | 0.03428613 | 14.4590429 | 1.2187101  | 171.545245 |
| cg00094858 | 0.03428772 | 3.22E-06   | 2.65E-11   | 0.39210589 |
| cg18296078 | 0.0342893  | 5018807454 | 5.22522198 | 4.8205E+18 |
| cg26257177 | 0.03429032 | 2.6268E+17 | 19.4721333 | 3.54E+33   |
| cg06965373 | 0.03429449 | 5.63359536 | 1.13647059 | 27.9262805 |
| cg04368094 | 0.03429855 | 7.36034035 | 1.15913064 | 46.7372772 |
| cg13601799 | 0.03430029 | 4.50249077 | 1.11772781 | 18.1371734 |
| cg18303049 | 0.03430059 | 2021.68915 | 1.75597906 | 2327605.79 |
| cg09424348 | 0.03431812 | 12.5346204 | 1.20538752 | 130.345391 |
| cg02208653 | 0.03431993 | 312770184  | 4.24164786 | 2.3063E+16 |
| cg14794786 | 0.0343439  | 1281545318 | 4.69522207 | 3.4979E+17 |
| cg00846114 | 0.03434584 | 6.29579247 | 1.14529808 | 34.60846   |
| cg08871855 | 0.03435222 | 6.16987809 | 1.14352502 | 33.2895171 |
| cg23659592 | 0.03436206 | 1.1573E+11 | 6.52902886 | 2.05E+21   |
| cg08245096 | 0.03436602 | 11.8141365 | 1.19939699 | 116.369994 |
| cg03423942 | 0.03437121 | 6517.68956 | 1.90869671 | 22256169.4 |

|            |            |            |            |            |
|------------|------------|------------|------------|------------|
| cg02399524 | 0.03437251 | 4.03355368 | 1.10809679 | 14.6824316 |
| cg03520966 | 0.03437339 | 453.882645 | 1.56868234 | 131326.432 |
| cg16911228 | 0.03437457 | 68977.8944 | 2.2702323  | 2095798703 |
| cg07469594 | 0.0343754  | 262.023635 | 1.50643416 | 45575.4303 |
| cg25969992 | 0.03438217 | 11.8419405 | 1.19935832 | 116.922152 |
| cg12834596 | 0.03438381 | 213.232853 | 1.48342208 | 30650.9188 |
| cg08917718 | 0.03438391 | 37.0324854 | 1.30422731 | 1051.50764 |
| cg12737497 | 0.03439391 | 572.536376 | 1.59465432 | 205560.476 |
| cg07948599 | 0.03440819 | 668520078  | 4.4452419  | 1.0054E+17 |
| cg08347626 | 0.03441527 | 0.13362292 | 0.02069681 | 0.86269722 |
| cg02737625 | 0.03441781 | 2.4457E+11 | 6.84724407 | 8.74E+21   |
| cg13041080 | 0.03443085 | 61.9954989 | 1.35324741 | 2840.16202 |
| cg16065270 | 0.03443129 | 356189203  | 4.23453168 | 2.9961E+16 |
| cg27475522 | 0.03443458 | 0.17115635 | 0.03333975 | 0.87866559 |
| cg13641837 | 0.03444124 | 221.768736 | 1.48533886 | 33111.2136 |
| cg00021325 | 0.03444956 | 10.0506946 | 1.18403082 | 85.3157365 |
| cg13883696 | 0.03445328 | 4.41728393 | 1.11484505 | 17.5023402 |
| cg08500346 | 0.03446502 | 2606.49973 | 1.77742726 | 3822289.1  |
| cg02532538 | 0.03446763 | 7.57316939 | 1.15953401 | 49.4620201 |
| cg10116014 | 0.03447003 | 0.10688519 | 0.01345298 | 0.84921312 |
| cg00103299 | 0.03447042 | 5.52246492 | 1.13304268 | 26.9165665 |
| cg18261462 | 0.03448066 | 4.11460547 | 1.10884807 | 15.2680774 |
| cg15169374 | 0.03448102 | 6.48410778 | 1.14629937 | 36.6777257 |
| cg10994379 | 0.03448372 | 10.7200278 | 1.18913692 | 96.6406763 |
| cg11367633 | 0.03448544 | 26.3911975 | 1.26996574 | 548.436297 |
| cg07397616 | 0.03448753 | 14.2794614 | 1.21423364 | 167.927334 |
| cg11142466 | 0.0344885  | 29716515.7 | 3.51192384 | 2.5145E+14 |
| cg23732024 | 0.03450762 | 3.30493358 | 1.09106101 | 10.0109763 |
| cg17473165 | 0.0345198  | 34.7102667 | 1.29481933 | 930.479326 |
| cg05596720 | 0.03452454 | 1317.45054 | 1.68721322 | 1028723.53 |

|            |            |            |            |            |
|------------|------------|------------|------------|------------|
| cg17895870 | 0.03452656 | 1301.18985 | 1.6855628  | 1004468.67 |
| cg02451467 | 0.03453472 | 0.00543032 | 4.31E-05   | 0.68418707 |
| cg13085065 | 0.0345362  | 877824508  | 4.47401845 | 1.7223E+17 |
| cg11928161 | 0.03454546 | 1122.20623 | 1.66636438 | 755745.163 |
| cg01585703 | 0.03455005 | 176.122415 | 1.45626246 | 21300.4908 |
| cg06990379 | 0.03455111 | 2113.9504  | 1.74449748 | 2561646.75 |
| cg13485756 | 0.03458735 | 3180170.02 | 2.96069481 | 3.4159E+12 |
| cg16556677 | 0.03459048 | 17.9821366 | 1.23296089 | 262.26074  |
| cg22742943 | 0.03459871 | 12302.6734 | 1.97817765 | 76512730.6 |
| cg00795268 | 0.03459963 | 0.0074483  | 7.91E-05   | 0.70124431 |
| cg10282371 | 0.03460703 | 25368.9994 | 2.08374402 | 308860457  |
| cg11863417 | 0.03461079 | 155.156516 | 1.44064178 | 16710.2917 |
| cg05102288 | 0.03461146 | 373316.718 | 2.53079791 | 5.5068E+10 |
| cg22378853 | 0.03462075 | 5.48267671 | 1.13095806 | 26.5790085 |
| cg16249035 | 0.03462237 | 0.08837302 | 0.00930757 | 0.83907915 |
| cg08233448 | 0.03463246 | 641123087  | 4.3293198  | 9.4943E+16 |
| cg13548946 | 0.03463351 | 40.4096818 | 1.3064161  | 1249.94049 |
| cg06044899 | 0.03463882 | 239.855931 | 1.48561317 | 38725.3349 |
| cg01437577 | 0.03464644 | 6.806E+11  | 7.14886882 | 6.48E+22   |
| cg09149894 | 0.03464688 | 4.44475946 | 1.11369907 | 17.738981  |
| cg06192381 | 0.03465434 | 33.8809276 | 1.28940168 | 890.271258 |
| cg02657892 | 0.03465491 | 6188406.69 | 3.09030424 | 1.2392E+13 |
| cg17193066 | 0.03465729 | 69573.0622 | 2.23519337 | 2165544624 |
| cg01868559 | 0.03470771 | 62859210.2 | 3.63521439 | 1.0869E+15 |
| cg18505959 | 0.03470773 | 7.21404288 | 1.15261412 | 45.1516372 |
| cg15112775 | 0.03471811 | 132126.377 | 2.33245385 | 7484555181 |
| cg05375507 | 0.03471962 | 2484272.55 | 2.87927441 | 2.1435E+12 |
| cg24832710 | 0.03472226 | 105.142813 | 1.39691685 | 7913.8649  |
| cg16332813 | 0.03472279 | 14.7588293 | 1.21321748 | 179.541628 |
| cg16197879 | 0.0347257  | 4535.13357 | 1.83016772 | 11238006.4 |

|            |            |            |            |            |
|------------|------------|------------|------------|------------|
| cg27398547 | 0.03472643 | 7.59017472 | 1.15660813 | 49.8100875 |
| cg16361947 | 0.03473051 | 13.6727588 | 1.20645261 | 154.953731 |
| cg25508545 | 0.03473407 | 16019.9491 | 2.00287832 | 128134977  |
| cg03803619 | 0.03473953 | 133041.357 | 2.33059163 | 7594639296 |
| cg15397308 | 0.03474969 | 118.042152 | 1.407629   | 9898.87935 |
| cg16741710 | 0.03475237 | 13.3609693 | 1.20410786 | 148.255406 |
| cg10937302 | 0.03476119 | 21.3059099 | 1.24487566 | 364.648303 |
| cg21245975 | 0.03476748 | 3.714187   | 1.09846494 | 12.5586029 |
| cg03341758 | 0.03476771 | 1520222.81 | 2.76976715 | 8.3439E+11 |
| cg15628917 | 0.03476803 | 3.80312834 | 1.10032286 | 13.1450374 |
| cg22918700 | 0.0347708  | 0.0111549  | 0.00017165 | 0.72491435 |
| cg26942121 | 0.0347711  | 5.27458371 | 1.12635418 | 24.7002531 |
| cg05338167 | 0.03477658 | 5.91015746 | 1.13550446 | 30.761624  |
| cg11884274 | 0.03477902 | 9.03869012 | 1.17050635 | 69.7970744 |
| cg16463395 | 0.03478069 | 79886.0319 | 2.2415459  | 2847043236 |
| cg04283162 | 0.034787   | 2.85548022 | 1.07787476 | 7.56467041 |
| cg14346208 | 0.03478884 | 4.38173681 | 1.11135731 | 17.2758277 |
| cg24417499 | 0.03478932 | 6.56004186 | 1.14386885 | 37.6215763 |
| cg04590978 | 0.03479456 | 68.1925114 | 1.35204104 | 3439.4064  |
| cg21591820 | 0.03480076 | 1635946.76 | 2.77762216 | 9.6353E+11 |
| cg16920620 | 0.0348024  | 17.9472402 | 1.22892929 | 262.100866 |
| cg27092787 | 0.03481527 | 416126.924 | 2.51654552 | 6.8809E+10 |
| cg10464585 | 0.03482194 | 11863012   | 3.19405568 | 4.406E+13  |
| cg18800391 | 0.0348279  | 1.9807E+10 | 5.4172776  | 7.2423E+19 |
| cg23652987 | 0.03482843 | 12.6769075 | 1.19839736 | 134.099081 |
| cg05304729 | 0.03482991 | 0.13605891 | 0.0213392  | 0.86751274 |
| cg05862039 | 0.03484094 | 5.57248497 | 1.13009725 | 27.4778021 |
| cg06536868 | 0.03484358 | 3.68176415 | 1.09721909 | 12.3543122 |
| cg20223364 | 0.03484718 | 272.14211  | 1.49028873 | 49695.9591 |
| cg18191200 | 0.03484753 | 1083.91885 | 1.64428767 | 714522.214 |

|            |            |            |            |            |
|------------|------------|------------|------------|------------|
| cg03463411 | 0.03486336 | 8.45102411 | 1.16382084 | 61.3666689 |
| cg02930317 | 0.03487742 | 6941491.61 | 3.06062089 | 1.5743E+13 |
| cg00776119 | 0.03487953 | 1740760.63 | 2.77386724 | 1.0924E+12 |
| cg15696309 | 0.03488372 | 0.02172509 | 0.00061939 | 0.7620118  |
| cg17379405 | 0.03488872 | 7.77715566 | 1.15665941 | 52.2921006 |
| cg04574507 | 0.03489629 | 0.26655342 | 0.07803475 | 0.91050111 |
| cg15340874 | 0.03489742 | 4.5153E+10 | 5.69504952 | 3.58E+20   |
| cg13792279 | 0.03491813 | 0.19340228 | 0.04201873 | 0.89018497 |
| cg08213047 | 0.03492616 | 7.4594E+10 | 5.87977017 | 9.46E+20   |
| cg07194495 | 0.03492701 | 1720976.25 | 2.76198298 | 1.0723E+12 |
| cg11582116 | 0.03493794 | 168.99205  | 1.43718081 | 19871.0648 |
| cg26860970 | 0.03493978 | 54.9432913 | 1.32738428 | 2274.22104 |
| cg02447095 | 0.03495257 | 15965.4999 | 1.98085882 | 128680138  |
| cg19872095 | 0.03495864 | 14.0768143 | 1.20525399 | 164.410742 |
| cg02735733 | 0.03496765 | 0.21149599 | 0.04991183 | 0.8961914  |
| cg15718222 | 0.0349746  | 10.9535923 | 1.18386652 | 101.346885 |
| cg10784843 | 0.03498185 | 9821262550 | 5.06072263 | 1.906E+19  |
| cg27637930 | 0.03499375 | 6.58320095 | 1.14190731 | 37.9527606 |
| cg12062819 | 0.03499617 | 2.47962602 | 1.06602189 | 5.76774757 |
| cg05422369 | 0.03499938 | 75344.3787 | 2.20435281 | 2575257180 |
| cg00249383 | 0.03500046 | 5.71268548 | 1.13049219 | 28.8677584 |
| cg01594685 | 0.03500086 | 25.3042953 | 1.25532473 | 510.073086 |
| cg26462404 | 0.03500442 | 15439880.5 | 3.20481077 | 7.4385E+13 |
| cg21157923 | 0.03500714 | 9.7772652  | 1.17397608 | 81.4283329 |
| cg03085549 | 0.03500716 | 6.17909621 | 1.13668332 | 33.5900327 |
| cg22573528 | 0.03501062 | 0.34393856 | 0.12751489 | 0.92768563 |
| cg22947959 | 0.03501373 | 11.0773726 | 1.1842362  | 103.617997 |
| cg06875660 | 0.03502426 | 1063309.12 | 2.65114767 | 4.2647E+11 |
| cg14095744 | 0.03502654 | 0.08511013 | 0.00861251 | 0.84107124 |
| cg26401236 | 0.03502665 | 2.6774E+10 | 5.40163306 | 1.33E+20   |



|            |            |            |            |            |
|------------|------------|------------|------------|------------|
| cg23878101 | 0.0350322  | 93028798.5 | 3.62705058 | 2.3861E+15 |
| cg02071074 | 0.03503302 | 13.6003079 | 1.20113733 | 153.994361 |
| cg23001000 | 0.03503791 | 2.7239E+10 | 5.40072541 | 1.37E+20   |
| cg22718077 | 0.03503876 | 0.21161645 | 0.04993856 | 0.89673246 |
| cg22377939 | 0.03503945 | 811.638521 | 1.60024637 | 411659.792 |
| cg03929531 | 0.03504684 | 0.25692569 | 0.07261296 | 0.90907759 |
| cg24177983 | 0.03505175 | 15.0456809 | 1.20937244 | 187.181804 |
| cg19472611 | 0.03505344 | 19581.8531 | 1.99943632 | 191778536  |
| cg18935660 | 0.03505457 | 4.77120176 | 1.11577235 | 20.4023395 |
| cg13320146 | 0.03505908 | 4.44064061 | 1.11013217 | 17.7630101 |
| cg05460130 | 0.035061   | 6.44326789 | 1.13945283 | 36.4347695 |
| cg12073353 | 0.03506961 | 41.5869493 | 1.29829636 | 1332.1106  |
| cg06545845 | 0.03507332 | 117366.959 | 2.26422202 | 6083768709 |
| cg03747003 | 0.03507413 | 31.9548646 | 1.27446074 | 801.212101 |
| cg00155423 | 0.03507413 | 5.63911481 | 1.1287277  | 28.1729739 |
| cg07614064 | 0.0350743  | 447486894  | 4.0327189  | 4.9655E+16 |
| cg26392924 | 0.03507468 | 631.979038 | 1.57057208 | 254300.653 |
| cg20299151 | 0.0350811  | 9.63E-12   | 5.47E-22   | 0.16950825 |
| cg23312397 | 0.0350845  | 11.7874039 | 1.18836266 | 116.919603 |
| cg24438687 | 0.03509361 | 471639.917 | 2.49243004 | 8.9248E+10 |
| cg01733284 | 0.03509893 | 0.26744039 | 0.07842944 | 0.91195811 |
| cg01389283 | 0.03510183 | 0.17310952 | 0.03387322 | 0.88467848 |
| cg04940329 | 0.03510312 | 0.18334118 | 0.03784316 | 0.88824483 |
| cg02296128 | 0.03510495 | 214703873  | 3.8191758  | 1.207E+16  |
| cg06500727 | 0.03510796 | 0.38318158 | 0.15700069 | 0.93520686 |
| cg13342158 | 0.03510856 | 5872156.16 | 2.96939883 | 1.1613E+13 |
| cg00979026 | 0.03511516 | 542.91389  | 1.55194273 | 189926.784 |
| cg07734926 | 0.03511719 | 42.6142736 | 1.29933441 | 1397.62043 |
| cg20426415 | 0.0351196  | 0.18564095 | 0.03875924 | 0.8891443  |
| cg01921126 | 0.03512012 | 17.1348779 | 1.21924177 | 240.808712 |

|            |            |            |            |            |
|------------|------------|------------|------------|------------|
| cg23654545 | 0.0351224  | 7.31E-07   | 1.43E-12   | 0.37320646 |
| cg27143605 | 0.03512869 | 157.154244 | 1.42280469 | 17358.2899 |
| cg05926928 | 0.03513002 | 27.3298677 | 1.259401   | 593.07692  |
| cg12585028 | 0.03513525 | 15.5916787 | 1.21098326 | 200.74633  |
| cg09161542 | 0.03513837 | 30.3469798 | 1.26844563 | 726.037573 |
| cg26715540 | 0.03513918 | 167.638978 | 1.42883577 | 19668.3394 |
| cg06257798 | 0.03514333 | 20.0039911 | 1.23204687 | 324.792561 |
| cg09804380 | 0.03514469 | 7.31344454 | 1.14863769 | 46.5651365 |
| cg17577122 | 0.03515438 | 5.90786005 | 1.13159064 | 30.8440253 |
| cg21287489 | 0.03515457 | 40.9906857 | 1.2949014  | 1297.57858 |
| cg25264370 | 0.03515825 | 1.2223E+11 | 5.90769441 | 2.53E+21   |
| cg14588779 | 0.03515868 | 40.2958788 | 1.29326173 | 1255.55238 |
| cg25181693 | 0.0351601  | 1248.3099  | 1.64212043 | 948942.342 |
| cg00411097 | 0.03516515 | 15.8941263 | 1.2120953  | 208.418638 |
| cg19176285 | 0.03517026 | 4.6921315  | 1.11345118 | 19.7728454 |
| cg07234865 | 0.0351718  | 4.69129114 | 1.11342387 | 19.7662481 |
| cg10641368 | 0.03517508 | 1.6666E+15 | 11.4233193 | 2.43E+29   |
| cg06719671 | 0.0351768  | 5.25055274 | 1.12212706 | 24.5678988 |
| cg04918402 | 0.0351828  | 4.89595946 | 1.11663426 | 21.4666699 |
| cg12819144 | 0.03518696 | 0.16318523 | 0.03020135 | 0.88172955 |
| cg03056526 | 0.0351895  | 10.7671116 | 1.17936073 | 98.2996035 |
| cg00830029 | 0.03519596 | 8.16194603 | 1.15681863 | 57.5866962 |
| cg07102854 | 0.03520677 | 1922.54744 | 1.68916828 | 2188170.77 |
| cg02713960 | 0.03520906 | 14.7076089 | 1.20484935 | 179.535938 |
| cg03427905 | 0.03521709 | 0.00689435 | 6.71E-05   | 0.70836165 |
| cg01303055 | 0.03521726 | 8.35439825 | 1.15842435 | 60.2507797 |
| cg17465219 | 0.03522058 | 174197907  | 3.7220071  | 8.1528E+15 |
| cg02015876 | 0.03522329 | 6.3660491  | 1.13675055 | 35.6512528 |
| cg01574788 | 0.03522361 | 6.43580006 | 1.13760528 | 36.4093971 |
| cg14618996 | 0.03522423 | 5.45840514 | 1.12469745 | 26.4908456 |

|            |            |            |            |            |
|------------|------------|------------|------------|------------|
| cg00474746 | 0.03522588 | 0.04031637 | 0.00203006 | 0.80066865 |
| cg18756771 | 0.03522658 | 8.14092649 | 1.156234   | 57.319439  |
| cg10270204 | 0.03523394 | 0.16180374 | 0.02969676 | 0.88159285 |
| cg27312391 | 0.0352349  | 0.02435442 | 0.00076698 | 0.77334169 |
| cg24476497 | 0.03524609 | 0.11280249 | 0.01479623 | 0.85997581 |
| cg06840042 | 0.03525336 | 2.13E-05   | 9.53E-10   | 0.47555558 |
| cg13033722 | 0.03525934 | 11.3264716 | 1.18249461 | 108.4901   |
| cg10788217 | 0.03525992 | 2140.47181 | 1.69826659 | 2697821.17 |
| cg13623690 | 0.03527102 | 11.0575475 | 1.18036534 | 103.586027 |
| cg06874326 | 0.03527216 | 75.0474102 | 1.34708337 | 4180.96897 |
| cg15843331 | 0.03527293 | 13.2831279 | 1.19536668 | 147.604488 |
| cg17379209 | 0.03527712 | 1.9961E+11 | 6.01735811 | 6.62E+21   |
| cg02910952 | 0.03529369 | 145.647798 | 1.40937652 | 15051.5356 |
| cg01643624 | 0.03530139 | 56.8545458 | 1.3207319  | 2447.46066 |
| cg14408814 | 0.03530373 | 6952596.15 | 2.95799088 | 1.6342E+13 |
| cg16121929 | 0.03532079 | 3.4825E+11 | 6.21606518 | 1.95E+22   |
| cg13288195 | 0.0353228  | 5.17573403 | 1.1196414  | 23.9257166 |
| cg06097557 | 0.03532365 | 10.3822286 | 1.17450854 | 91.7751266 |
| cg21558912 | 0.03533496 | 33648508.6 | 3.2880945  | 3.4434E+14 |
| cg16740166 | 0.03534179 | 1056812.82 | 2.59127243 | 4.3101E+11 |
| cg09473613 | 0.03534386 | 4.42451095 | 1.10746034 | 17.6767478 |
| cg21872093 | 0.03535507 | 6.62464068 | 1.13844677 | 38.5488943 |
| cg21940708 | 0.03535838 | 3185.48093 | 1.73851276 | 5836764.06 |
| cg20648939 | 0.03536377 | 1022452185 | 4.14433605 | 2.5225E+17 |
| cg11864574 | 0.03536448 | 7.27518357 | 1.14567485 | 46.1983572 |
| cg11731890 | 0.03537783 | 3.47980089 | 1.08911949 | 11.1181687 |
| cg14286292 | 0.03538811 | 13.1063868 | 1.1924661  | 144.052207 |
| cg21437596 | 0.0353883  | 80.9712696 | 1.35065807 | 4854.18676 |
| cg07451103 | 0.03539449 | 1698.95466 | 1.66291267 | 1735777.82 |
| cg14240300 | 0.03540166 | 6.72057744 | 1.13905655 | 39.6522555 |

|            |            |            |            |            |
|------------|------------|------------|------------|------------|
| cg26691604 | 0.0354063  | 171.696834 | 1.42125478 | 20742.0959 |
| cg15029192 | 0.03540803 | 7418936.23 | 2.94645534 | 1.868E+13  |
| cg21992238 | 0.03540807 | 6.00066885 | 1.13020486 | 31.8597345 |
| cg14788768 | 0.0354155  | 0.35694796 | 0.13669529 | 0.9320866  |
| cg08821874 | 0.0354161  | 3.44E-07   | 3.27E-13   | 0.36203987 |
| cg15042460 | 0.03541819 | 170.697872 | 1.42024759 | 20515.9745 |
| cg09819958 | 0.03542461 | 7377.50224 | 1.83604822 | 29643850.7 |
| cg06971353 | 0.03542974 | 65.7186361 | 1.33033978 | 3246.49327 |
| cg19227170 | 0.0354345  | 13.777205  | 1.19580651 | 158.730845 |
| cg13763617 | 0.03543635 | 264.793443 | 1.46270263 | 47935.6267 |
| cg01662334 | 0.03543675 | 8.06759946 | 1.15293769 | 56.4524534 |
| cg27382247 | 0.03544238 | 26318.4389 | 2.00064071 | 346219199  |
| cg01015662 | 0.03545513 | 16.3830703 | 1.20965869 | 221.884896 |
| cg23666180 | 0.03545903 | 63.9734335 | 1.32708034 | 3083.91292 |
| cg23202177 | 0.03546093 | 5.03660432 | 1.11628039 | 22.7249203 |
| cg22758697 | 0.03547091 | 1396.43717 | 1.63616601 | 1191833.07 |
| cg05096161 | 0.0354714  | 5.77161207 | 1.12656968 | 29.5689707 |
| cg27566947 | 0.03548619 | 26.178419  | 1.24823105 | 549.024657 |
| cg19803052 | 0.03549116 | 4.32607369 | 1.10454192 | 16.9435974 |
| cg15699226 | 0.03549117 | 6.82850949 | 1.13930349 | 40.927235  |
| cg23130010 | 0.03549138 | 0.00420181 | 2.56E-05   | 0.68970924 |
| cg09254001 | 0.03549146 | 202898.226 | 2.29236899 | 1.7959E+10 |
| cg13862711 | 0.03549254 | 4.20729742 | 1.10244532 | 16.0564441 |
| cg14636712 | 0.03549552 | 183021.938 | 2.27581345 | 1.4719E+10 |
| cg20229931 | 0.03549603 | 6.65973794 | 1.13731644 | 38.9971583 |
| cg22871548 | 0.0355003  | 143307.917 | 2.23770308 | 9177785623 |
| cg23865240 | 0.0355065  | 4.47219086 | 1.10690668 | 18.0688142 |
| cg18568145 | 0.03550746 | 47.7458316 | 1.29968578 | 1754.01198 |
| cg11690979 | 0.03551364 | 4.7159393  | 1.11083483 | 20.0210534 |
| cg12078933 | 0.03551372 | 9.73828251 | 1.16678713 | 81.278019  |

|            |            |            |            |            |
|------------|------------|------------|------------|------------|
| cg14971941 | 0.03551949 | 30.9932645 | 1.2618939  | 761.222829 |
| cg13085976 | 0.03552093 | 8.75241525 | 1.1582856  | 66.136342  |
| cg12782992 | 0.03552146 | 4.70718789 | 1.11062681 | 19.950552  |
| cg26579311 | 0.0355315  | 1.9956E+10 | 4.97887201 | 8.00E+19   |
| cg23873872 | 0.0355317  | 3.8605E+11 | 6.08410669 | 2.45E+22   |
| cg03237964 | 0.0355331  | 476.225344 | 1.51781324 | 149419.291 |
| cg04204002 | 0.03553537 | 39388.9986 | 2.04613727 | 758254704  |
| cg06704455 | 0.03553817 | 4.94532109 | 1.11419478 | 21.9496637 |
| cg19552441 | 0.03553937 | 5.19824695 | 1.11794952 | 24.1708331 |
| cg03237606 | 0.03554191 | 9.68481473 | 1.16597375 | 80.4440377 |
| cg04984818 | 0.03554216 | 3.51172444 | 1.08866063 | 11.3278722 |
| cg26667761 | 0.03554696 | 3361.13587 | 1.73142623 | 6524814.14 |
| cg13787438 | 0.03555438 | 12.4797426 | 1.18595038 | 131.324192 |
| cg15242360 | 0.03556719 | 0.19731168 | 0.0434394  | 0.89623486 |
| cg04543413 | 0.03556808 | 3.42098616 | 1.08655957 | 10.7708281 |
| cg26817935 | 0.0355779  | 5.04455411 | 1.11533007 | 22.8161392 |
| cg09409749 | 0.03557809 | 48.866911  | 1.29992317 | 1837.01241 |
| cg10111008 | 0.03559176 | 294135995  | 3.7203644  | 2.3255E+16 |
| cg09013975 | 0.03559958 | 8.08905143 | 1.15115948 | 56.8407371 |
| cg12625296 | 0.03560472 | 9925190.41 | 2.95774329 | 3.3306E+13 |
| cg00532413 | 0.03560731 | 10.0376165 | 1.16790642 | 86.2686794 |
| cg09569536 | 0.03560774 | 26.6614909 | 1.2472586  | 569.917979 |
| cg09067228 | 0.03561127 | 50.7877464 | 1.30244826 | 1980.42045 |
| cg18154114 | 0.03561239 | 4409.57209 | 1.7586038  | 11056683.7 |
| cg20957975 | 0.0356134  | 9797078.55 | 2.95306954 | 3.2503E+13 |
| cg04039784 | 0.0356169  | 5276423359 | 4.50635586 | 6.1781E+18 |
| cg20439022 | 0.03561745 | 8.94761982 | 1.15877592 | 69.0900619 |
| cg12659606 | 0.03561945 | 6.33137866 | 1.13211428 | 35.4084005 |
| cg08208505 | 0.03562382 | 5.6076E+11 | 6.16156941 | 5.10E+22   |
| cg21153026 | 0.03562529 | 2072760.55 | 2.65777576 | 1.6165E+12 |

|            |            |            |            |            |
|------------|------------|------------|------------|------------|
| cg20929407 | 0.03563263 | 185956.246 | 2.25916225 | 1.5306E+10 |
| cg15104158 | 0.03563333 | 4.48848265 | 1.10611266 | 18.2137654 |
| cg13840445 | 0.03563849 | 11.7223774 | 1.17970744 | 116.481534 |
| cg00594128 | 0.03564133 | 5.40861638 | 1.1199775  | 26.1193918 |
| cg24298175 | 0.03564501 | 15314236.7 | 3.0351096  | 7.7271E+13 |
| cg00766289 | 0.03564552 | 0.21560424 | 0.05152637 | 0.90216315 |
| cg11985218 | 0.03564615 | 26.5015335 | 1.24595995 | 563.686882 |
| cg16855929 | 0.03565467 | 30.7884772 | 1.25837318 | 753.298263 |
| cg26764215 | 0.03566034 | 592160.821 | 2.43740064 | 1.4386E+11 |
| cg23849169 | 0.03566415 | 5.19188504 | 1.11669483 | 24.1387973 |
| cg21576886 | 0.03566577 | 0.21317448 | 0.0504019  | 0.90161997 |
| cg22137448 | 0.03567362 | 8052.00733 | 1.82620973 | 35502396.6 |
| cg21300742 | 0.03567857 | 4632133.49 | 2.79378703 | 7.6801E+12 |
| cg23620049 | 0.03567922 | 7.08109653 | 1.13999023 | 43.9845245 |
| cg00813378 | 0.03568637 | 3.42245414 | 1.08579128 | 10.7877016 |
| cg24441912 | 0.03568814 | 912654.305 | 2.5042751  | 3.3261E+11 |
| cg01814969 | 0.03570268 | 2849.37181 | 1.70150211 | 4771618.95 |
| cg26933795 | 0.03570489 | 573249.03  | 2.42485204 | 1.3552E+11 |
| cg24303559 | 0.03570501 | 0.14891478 | 0.02518413 | 0.88053927 |
| cg24598948 | 0.03570661 | 0.20070456 | 0.04484365 | 0.89828364 |
| cg01651570 | 0.03570814 | 3.74186475 | 1.09213327 | 12.8203692 |
| cg05713474 | 0.03570883 | 9.42E-10   | 3.56E-18   | 0.24957459 |
| cg19565710 | 0.03571867 | 1.538E+11  | 5.57910361 | 4.24E+21   |
| cg14400246 | 0.03572643 | 14704.386  | 1.89649624 | 114009701  |
| cg13285637 | 0.03573256 | 30.0301027 | 1.25458866 | 718.806965 |
| cg05827233 | 0.03573593 | 0.14440935 | 0.02372477 | 0.87899963 |
| cg11733478 | 0.03575499 | 144136.873 | 2.20457727 | 9423774134 |
| cg26505878 | 0.0357552  | 65.2072289 | 1.32051273 | 3219.94829 |
| cg21779231 | 0.03576057 | 174.128932 | 1.40951831 | 21511.5226 |
| cg24791380 | 0.03576404 | 193.914018 | 1.41951444 | 26489.795  |

|            |            |            |            |            |
|------------|------------|------------|------------|------------|
| cg21041775 | 0.03576505 | 3.20586726 | 1.08055242 | 9.5114172  |
| cg14511745 | 0.03576786 | 859494.928 | 2.48055287 | 2.9781E+11 |
| cg04936446 | 0.03577224 | 1010.6109  | 1.58379362 | 644865.832 |
| cg07731871 | 0.0357796  | 6.9001151  | 1.13690214 | 41.8783522 |
| cg14248370 | 0.03578221 | 2512597226 | 4.21019759 | 1.4995E+18 |
| cg18223453 | 0.03578864 | 6.53366902 | 1.13269139 | 37.6879628 |
| cg13897241 | 0.03579042 | 9.90736521 | 1.16440631 | 84.2969368 |
| cg04632980 | 0.03580521 | 1048.79786 | 1.5858656  | 693612.977 |
| cg25225632 | 0.03580553 | 503910.216 | 2.38806651 | 1.0633E+11 |
| cg00689580 | 0.03580678 | 3.86353537 | 1.09373318 | 13.6476664 |
| cg17677842 | 0.0358111  | 4166.28739 | 1.73730145 | 9991329.1  |
| cg10459387 | 0.03581656 | 59.3957931 | 1.31067554 | 2691.63506 |
| cg04337534 | 0.03581939 | 15.7635445 | 1.20037391 | 207.009942 |
| cg03541791 | 0.03582126 | 125.106564 | 1.37681613 | 11368.0047 |
| cg07685728 | 0.03582469 | 10.2806147 | 1.1667976  | 90.5821524 |
| cg15816080 | 0.03582576 | 205632.392 | 2.24748758 | 1.8814E+10 |
| cg17493098 | 0.03583926 | 23.2954516 | 1.23143828 | 440.68637  |
| cg11658047 | 0.0358425  | 105.587182 | 1.36075829 | 8192.97092 |
| cg04882359 | 0.0358454  | 3232.16944 | 1.70593013 | 6123884.64 |
| cg13286281 | 0.03585293 | 7.34476304 | 1.14078618 | 47.2880415 |
| cg01040499 | 0.03585411 | 15.2553084 | 1.19719994 | 194.390617 |
| cg02203542 | 0.03585435 | 452959389  | 3.73022302 | 5.5003E+16 |
| cg02707071 | 0.03585497 | 6.88196767 | 1.13586964 | 41.6962277 |
| cg22009551 | 0.03585626 | 6666322.89 | 2.82262753 | 1.5744E+13 |
| cg14334286 | 0.03585792 | 4.25344303 | 1.10031523 | 16.4423585 |
| cg07913620 | 0.03586602 | 41646875.1 | 3.18292819 | 5.4493E+14 |
| cg22508569 | 0.03586815 | 1673.69774 | 1.63192542 | 1716539.3  |
| cg10959651 | 0.03588164 | 25.4965481 | 1.23795488 | 525.119269 |
| cg08708747 | 0.03589147 | 13.9767398 | 1.18970665 | 164.199516 |
| cg21803680 | 0.03589809 | 52.8503229 | 1.29845731 | 2151.13475 |

|            |            |            |            |            |
|------------|------------|------------|------------|------------|
| cg10455560 | 0.03589961 | 881175.352 | 2.46215799 | 3.1536E+11 |
| cg09659004 | 0.03590278 | 5.84609938 | 1.12321897 | 30.427618  |
| cg11756870 | 0.03590658 | 5.27274522 | 1.11557949 | 24.9214354 |
| cg15320998 | 0.03590766 | 11.0044551 | 1.17088939 | 103.423973 |
| cg23025703 | 0.03591031 | 12.50532   | 1.18073866 | 132.445081 |
| cg02026377 | 0.03591268 | 1588.86576 | 1.62364485 | 1554831.64 |
| cg00500522 | 0.03591285 | 17289.2635 | 1.89957375 | 157360898  |
| cg11110213 | 0.0359189  | 543.724874 | 1.51280236 | 195423.241 |
| cg04347874 | 0.03592281 | 8.11320539 | 1.14746263 | 57.3649196 |
| cg04329454 | 0.03592928 | 8.12394805 | 1.14748405 | 57.5158602 |
| cg26518580 | 0.03592961 | 6.46856596 | 1.13043714 | 37.0143054 |
| cg18982073 | 0.03593796 | 20.0894922 | 1.21762124 | 331.455861 |
| cg11980016 | 0.03594054 | 11.2351532 | 1.17201858 | 107.701934 |
| cg21962450 | 0.03594379 | 13.9469821 | 1.18871337 | 163.637691 |
| cg06755309 | 0.03594737 | 321824.537 | 2.29719052 | 4.5086E+10 |
| cg17829017 | 0.03596851 | 0.0682009  | 0.00554546 | 0.83876949 |
| cg16158863 | 0.03596961 | 6.3818862  | 1.1290143  | 36.0743628 |
| cg06811800 | 0.03597504 | 0.14336426 | 0.0233392  | 0.88063483 |
| cg00543443 | 0.03597955 | 143.944957 | 1.38416381 | 14969.4353 |
| cg24542360 | 0.03598022 | 802.938003 | 1.5488605  | 416247.58  |
| cg04254119 | 0.03598212 | 0.15720446 | 0.02789241 | 0.88602047 |
| cg05445638 | 0.03598258 | 97.8423573 | 1.34954809 | 7093.57969 |
| cg00953066 | 0.03598743 | 1009857100 | 3.87877158 | 2.6292E+17 |
| cg20859525 | 0.03598866 | 5336949.21 | 2.75287058 | 1.0347E+13 |
| cg09097040 | 0.03599032 | 6.0548E+11 | 5.89029087 | 6.22E+22   |
| cg02554391 | 0.03599098 | 0.00635233 | 5.62E-05   | 0.71844919 |
| cg10257332 | 0.03599233 | 12.8403746 | 1.18154692 | 139.541831 |
| cg12020230 | 0.03599252 | 0.06690203 | 0.00534122 | 0.83798811 |
| cg02191862 | 0.03599298 | 9.30028005 | 1.15689186 | 74.7651631 |
| cg19518003 | 0.03599497 | 748.160411 | 1.54095989 | 363243.719 |



|            |            |            |            |            |
|------------|------------|------------|------------|------------|
| cg26173173 | 0.03599857 | 22238.365  | 1.92294855 | 257180503  |
| cg08023416 | 0.03600433 | 20.7101209 | 1.21881963 | 351.905319 |
| cg23874600 | 0.03600516 | 10.7358516 | 1.16762557 | 98.7118758 |
| cg06639387 | 0.03600533 | 27365012.4 | 3.05893357 | 2.4481E+14 |
| cg24354901 | 0.03601075 | 28739.351  | 1.95420336 | 422653196  |
| cg16884042 | 0.03601274 | 2240857.91 | 2.59643912 | 1.934E+12  |
| cg16345031 | 0.03602945 | 14225600.9 | 2.92517236 | 6.9181E+13 |
| cg17527574 | 0.0360408  | 182451.295 | 2.20068529 | 1.5126E+10 |
| cg07064364 | 0.03604442 | 21.5951561 | 1.22139689 | 381.81755  |
| cg06321304 | 0.03605365 | 9128.92385 | 1.80971632 | 46049897.4 |
| cg03684845 | 0.03605479 | 9.49153171 | 1.15762118 | 77.8226731 |
| cg10776186 | 0.03606578 | 0.12801726 | 0.01873059 | 0.87495488 |
| cg25003924 | 0.03607207 | 0.07686242 | 0.00697919 | 0.8464926  |
| cg15322516 | 0.03607209 | 5.28920865 | 1.11426056 | 25.1069895 |
| cg04203587 | 0.03607373 | 13.0393349 | 1.18149133 | 143.906476 |
| cg05204981 | 0.03607601 | 77.1667134 | 1.3260439  | 4490.57656 |
| cg11858733 | 0.0360858  | 9.45027967 | 1.15688784 | 77.1965807 |
| cg21748751 | 0.03609185 | 15.5475451 | 1.19476967 | 202.320299 |
| cg09571713 | 0.03609206 | 5.30396135 | 1.11427543 | 25.2469051 |
| cg26994334 | 0.03610586 | 40608.9474 | 1.98867352 | 829239486  |
| cg05804949 | 0.03610625 | 136.189457 | 1.37484423 | 13490.6688 |
| cg09896999 | 0.03611025 | 0.01778596 | 0.00041066 | 0.77032193 |
| cg25883149 | 0.03611258 | 3.9871671  | 1.09368672 | 14.5356995 |
| cg19501190 | 0.03611584 | 6.18846702 | 1.12523163 | 34.0348806 |
| cg06641959 | 0.03611893 | 1477727.62 | 2.50774588 | 8.7077E+11 |
| cg24176760 | 0.03612214 | 70.7489995 | 1.31728653 | 3799.79664 |
| cg09118552 | 0.03612259 | 5.03339595 | 1.11022273 | 22.8198127 |
| cg03004714 | 0.03612601 | 5.09760956 | 1.11110256 | 23.3872409 |
| cg25098077 | 0.0361266  | 1914686.3  | 2.54872068 | 1.4384E+12 |
| cg09398924 | 0.03612685 | 20.7939215 | 1.21686294 | 355.329396 |

|            |            |            |            |            |
|------------|------------|------------|------------|------------|
| cg18840832 | 0.03613304 | 391.30144  | 1.47095076 | 104093.774 |
| cg09173344 | 0.03613746 | 10304.9702 | 1.81694796 | 58445488.7 |
| cg13884871 | 0.03614307 | 913.379495 | 1.55327405 | 537099.106 |
| cg18558763 | 0.03614856 | 744496.963 | 2.39409037 | 2.3152E+11 |
| cg27611781 | 0.03615388 | 22.7452128 | 1.22342346 | 422.866425 |
| cg18235443 | 0.0361543  | 49603454.7 | 3.13812323 | 7.8407E+14 |
| cg15496079 | 0.03615664 | 28115503.8 | 3.02460635 | 2.6135E+14 |
| cg01268541 | 0.03615845 | 4.54620824 | 1.10263331 | 18.7442272 |
| cg10171063 | 0.03616184 | 3.22975596 | 1.07855579 | 9.67156602 |
| cg18796438 | 0.03616217 | 0.02140993 | 0.00058736 | 0.78041133 |
| cg18991611 | 0.03616243 | 2.74083498 | 1.06719348 | 7.03918877 |
| cg04411541 | 0.03616426 | 6.91043115 | 1.13276502 | 42.1570741 |
| cg27529569 | 0.03617812 | 1.0377E+10 | 4.41815974 | 2.4374E+19 |
| cg26843035 | 0.03618319 | 8.4777E+10 | 5.05507183 | 1.42E+21   |
| cg22276896 | 0.03619043 | 5.70110649 | 1.11854266 | 29.0580022 |
| cg24350628 | 0.03619557 | 1973.41582 | 1.6292622  | 2390265.97 |
| cg11366901 | 0.03621126 | 14751402.9 | 2.88819677 | 7.5342E+13 |
| cg23622514 | 0.03621187 | 0.00051694 | 4.35E-07   | 0.61494311 |
| cg11094694 | 0.03621624 | 3463375032 | 4.09933679 | 2.9261E+18 |
| cg25565132 | 0.03621725 | 43.0810587 | 1.27338706 | 1457.51255 |
| cg08158952 | 0.03622923 | 3.58800828 | 1.08542932 | 11.8605635 |
| cg05010623 | 0.03623167 | 1380036.96 | 2.47676043 | 7.6895E+11 |
| cg18816996 | 0.03623206 | 8.2204346  | 1.14469611 | 59.0336108 |
| cg20198611 | 0.03623788 | 0.02210276 | 0.0006238  | 0.78315039 |
| cg27115340 | 0.03624077 | 331.946026 | 1.45082633 | 75948.5556 |
| cg04346128 | 0.03625241 | 11.7456509 | 1.17090863 | 117.823297 |
| cg08093097 | 0.03625988 | 546.684918 | 1.49707229 | 199632.577 |
| cg23085143 | 0.03626189 | 0.22155542 | 0.05405724 | 0.90805238 |
| cg02221303 | 0.03626257 | 1191.05047 | 1.57343544 | 901594.8   |
| cg03249020 | 0.03626451 | 5.69898757 | 1.1177923  | 29.0558982 |

|            |            |            |            |            |
|------------|------------|------------|------------|------------|
| cg18226566 | 0.03626548 | 476804.105 | 2.30840152 | 9.8485E+10 |
| cg15782984 | 0.03626805 | 0.03373148 | 0.00141329 | 0.80508141 |
| cg04945511 | 0.03627335 | 162427.364 | 2.15368613 | 1.225E+10  |
| cg00541476 | 0.03627614 | 296.619682 | 1.43894421 | 61144.2993 |
| cg21304158 | 0.03627824 | 6.57384097 | 1.12790711 | 38.3146668 |
| cg22295389 | 0.03628523 | 197.457783 | 1.40165609 | 27816.792  |
| cg25278941 | 0.0362968  | 4.7978984  | 1.10526895 | 20.8273553 |
| cg08695703 | 0.03630241 | 6.74928267 | 1.12954598 | 40.3284304 |
| cg26008908 | 0.0363074  | 6.06697611 | 1.12184141 | 32.8105191 |
| cg16414271 | 0.03630838 | 182841.908 | 2.16543789 | 1.5439E+10 |
| cg05007549 | 0.03631316 | 6.83722159 | 1.13036209 | 41.3563049 |
| cg00013475 | 0.03631755 | 11.3314811 | 1.16729324 | 110.000179 |
| cg09687332 | 0.03632348 | 3508455.94 | 2.61135109 | 4.7138E+12 |
| cg05636499 | 0.0363354  | 83606258.8 | 3.19229146 | 2.1897E+15 |
| cg14839898 | 0.03633769 | 0.04463018 | 0.00242755 | 0.82052088 |
| cg21410954 | 0.03634386 | 31.4289533 | 1.24512665 | 793.316173 |
| cg05876083 | 0.03635081 | 3.77E-09   | 4.88E-17   | 0.29151404 |
| cg20724257 | 0.03636163 | 9.15078337 | 1.1509394  | 72.7552089 |
| cg19039028 | 0.03636578 | 6.0764071  | 1.12136028 | 32.9267266 |
| cg00036011 | 0.03636672 | 3.156869   | 1.07569703 | 9.26452483 |
| cg22021322 | 0.03637256 | 1252.45459 | 1.57230823 | 997668.566 |
| cg09651522 | 0.03638076 | 6.38357819 | 1.12471965 | 36.2313138 |
| cg01292626 | 0.03638383 | 63.8584233 | 1.30145834 | 3133.32982 |
| cg21271767 | 0.0363902  | 2407.82262 | 1.63775328 | 3539977.51 |
| cg12828075 | 0.03639901 | 4.3730719  | 1.09791784 | 17.4182049 |
| cg12570246 | 0.03640147 | 0.20412315 | 0.04607533 | 0.90430725 |
| cg14112356 | 0.03640287 | 32.8415106 | 1.24732405 | 864.702978 |
| cg26121931 | 0.03640328 | 2.70085612 | 1.06490346 | 6.85003295 |
| cg01760189 | 0.03640767 | 7.72467266 | 1.13808694 | 52.4305883 |
| cg22486630 | 0.03640932 | 8.62150874 | 1.14600331 | 64.860557  |

|            |            |            |            |            |
|------------|------------|------------|------------|------------|
| cg22625098 | 0.03641355 | 26.5824597 | 1.23052666 | 574.247746 |
| cg14022550 | 0.03641613 | 74.3470565 | 1.31314918 | 4209.335   |
| cg09138133 | 0.0364225  | 5.67183399 | 1.115916   | 28.8280667 |
| cg17457440 | 0.0364238  | 32728.4504 | 1.92881687 | 555341196  |
| cg02402637 | 0.03642497 | 90575.9786 | 2.05682211 | 3988681303 |
| cg19274914 | 0.03642658 | 28.8114661 | 1.23653748 | 671.310483 |
| cg06644428 | 0.03643158 | 4.00215987 | 1.09152723 | 14.6741952 |
| cg16198723 | 0.03643683 | 7.93800475 | 1.13970549 | 55.2878968 |
| cg20276377 | 0.03643874 | 4.59398172 | 1.10101483 | 19.1683776 |
| cg12146178 | 0.03645251 | 1225128.82 | 2.42006714 | 6.2021E+11 |
| cg08881995 | 0.03646916 | 5339338297 | 4.0969049  | 6.9586E+18 |
| cg18780769 | 0.03647147 | 4.99587844 | 1.10656634 | 22.5551786 |
| cg03101763 | 0.03647173 | 10.4227583 | 1.15899205 | 93.7313515 |
| cg06398287 | 0.0364783  | 356.206482 | 1.44724446 | 87672.167  |
| cg25879745 | 0.03647902 | 11.0144143 | 1.16292547 | 104.320805 |
| cg19632842 | 0.03648213 | 488.228469 | 1.4760628  | 161488.413 |
| cg18639233 | 0.03649823 | 3.37238023 | 1.07935129 | 10.5368369 |
| cg10439691 | 0.03650201 | 148067.97  | 2.11197828 | 1.0381E+10 |
| cg01951603 | 0.03650468 | 6774.84972 | 1.73987355 | 26380416.4 |
| cg24416238 | 0.03650685 | 13.5291824 | 1.1776413  | 155.428293 |
| cg06185555 | 0.03650963 | 267.513041 | 1.42016053 | 50390.942  |
| cg02273392 | 0.03651786 | 11.8811715 | 1.16791893 | 120.866468 |
| cg05297121 | 0.03651966 | 12.1227163 | 1.16936778 | 125.674961 |
| cg17896947 | 0.03652368 | 2075.0928  | 1.61413725 | 2667685.24 |
| cg06888626 | 0.03653667 | 6012.63941 | 1.72448242 | 20963874.3 |
| cg16630572 | 0.03653694 | 16.0272377 | 1.18973712 | 215.906811 |
| cg05527530 | 0.03653845 | 5.02582911 | 1.10638413 | 22.8301886 |
| cg14889011 | 0.03654294 | 4072.8644  | 1.68248756 | 9859344.45 |
| cg12452106 | 0.03654344 | 20264.2754 | 1.86019015 | 220752087  |
| cg12019109 | 0.03654378 | 5.13456644 | 1.10781968 | 23.7978915 |

|            |            |            |            |            |
|------------|------------|------------|------------|------------|
| cg00885546 | 0.0365448  | 31.6475682 | 1.2413544  | 806.835315 |
| cg09369294 | 0.03655178 | 7831385.82 | 2.6989609  | 2.2724E+13 |
| cg04983381 | 0.03655463 | 3115851.51 | 2.54723176 | 3.8114E+12 |
| cg14074581 | 0.03655542 | 11.8875182 | 1.16741513 | 121.047848 |
| cg06320150 | 0.03655563 | 0.11093501 | 0.01412043 | 0.87154383 |
| cg16501237 | 0.03657687 | 5.32514746 | 1.11004241 | 25.546047  |
| cg12616484 | 0.03658033 | 92.6879212 | 1.32663941 | 6475.79944 |
| cg09470142 | 0.03658984 | 4032.96404 | 1.678182   | 9691915.97 |
| cg23242017 | 0.03659048 | 6.80E-07   | 1.12E-12   | 0.41252232 |
| cg17400113 | 0.03659384 | 9.96665118 | 1.15411068 | 86.069852  |
| cg26162554 | 0.0365941  | 3.94355981 | 1.08929533 | 14.2768113 |
| cg19906093 | 0.03661672 | 39.9518806 | 1.25792094 | 1268.88162 |
| cg23766305 | 0.03661715 | 1259102.82 | 2.39637338 | 6.6156E+11 |
| cg07109238 | 0.03661841 | 4.45937396 | 1.09747506 | 18.1197886 |
| cg00630431 | 0.03662948 | 1462.33954 | 1.57303682 | 1359432.22 |
| cg18800100 | 0.03663014 | 999.688354 | 1.53624794 | 650530.934 |
| cg06458795 | 0.03663531 | 5.5496E+12 | 6.19171054 | 4.97E+24   |
| cg04916289 | 0.03663615 | 9.36497372 | 1.1490961  | 76.3232359 |
| cg15338603 | 0.0366431  | 47364505.3 | 2.99628411 | 7.4873E+14 |
| cg14031178 | 0.03664538 | 8.26735771 | 1.14011994 | 59.9491343 |
| cg25886284 | 0.03665056 | 4.55529953 | 1.09866172 | 18.8873002 |
| cg09225691 | 0.03665185 | 1.9168E+12 | 5.78243672 | 6.35E+23   |
| cg04962480 | 0.03665196 | 116.126957 | 1.34314876 | 10040.1911 |
| cg01612730 | 0.0366542  | 7.53775397 | 1.13349848 | 50.1259915 |
| cg05529874 | 0.03666295 | 0.14665343 | 0.02422525 | 0.88780209 |
| cg14452947 | 0.03667254 | 7.40914528 | 1.13208145 | 48.4907105 |
| cg01377358 | 0.03667545 | 6.56976795 | 1.12365026 | 38.4121753 |
| cg08074477 | 0.03668131 | 21.8010093 | 1.2101889  | 392.735388 |
| cg22017954 | 0.03668308 | 101480.79  | 2.04106256 | 5045583096 |
| cg12416067 | 0.03668798 | 569505.395 | 2.27028211 | 1.4286E+11 |

|            |            |            |            |            |
|------------|------------|------------|------------|------------|
| cg22678932 | 0.03668867 | 5706.34557 | 1.70759436 | 19069154   |
| cg04521765 | 0.0366894  | 12.974148  | 1.1718064  | 143.648744 |
| cg15042811 | 0.03670278 | 3.73431389 | 1.08482372 | 12.8547154 |
| cg04241844 | 0.03670684 | 30.0833494 | 1.23401843 | 733.382814 |
| cg10164393 | 0.03670907 | 6.09890113 | 1.11814766 | 33.2662637 |
| cg05708074 | 0.03671207 | 0.00088889 | 1.22E-06   | 0.64803526 |
| cg07028390 | 0.03671755 | 49803157.8 | 2.98590869 | 8.3069E+14 |
| cg19478371 | 0.03672168 | 196.256529 | 1.38505301 | 27808.7735 |
| cg13570585 | 0.03672788 | 4.60553344 | 1.098762   | 19.3043975 |
| cg13812587 | 0.03673097 | 95.7496938 | 1.32477969 | 6920.39888 |
| cg21281951 | 0.03673342 | 5.54604357 | 1.11137324 | 27.6762102 |
| cg09231767 | 0.03673558 | 0.19789934 | 0.04327619 | 0.90498137 |
| cg00326648 | 0.0367359  | 8.35494521 | 1.13977259 | 61.2447693 |
| cg01792640 | 0.0367408  | 6.68400083 | 1.12415391 | 39.7417709 |
| cg24441185 | 0.03674603 | 20135.3129 | 1.84089935 | 220235193  |
| cg21851937 | 0.03675798 | 15.1350026 | 1.18192757 | 193.809087 |
| cg04837533 | 0.03675924 | 43.2820352 | 1.26082001 | 1485.80651 |
| cg11441617 | 0.03675945 | 27154.3128 | 1.87383418 | 393501576  |
| cg25968378 | 0.03676053 | 747108261  | 3.51370443 | 1.5886E+17 |
| cg26674967 | 0.03676605 | 18198.0684 | 1.82767667 | 181197090  |
| cg23406136 | 0.03677865 | 25.5909528 | 1.22033316 | 536.654156 |
| cg05168491 | 0.03678615 | 14.5704283 | 1.17872311 | 180.107931 |
| cg11931731 | 0.03678619 | 4.17606925 | 1.09169535 | 15.9747445 |
| cg08223837 | 0.03679723 | 36.7941764 | 1.24743571 | 1085.2755  |
| cg06299833 | 0.03680177 | 3.69268517 | 1.08337362 | 12.5865384 |
| cg03221247 | 0.0368081  | 181.156558 | 1.37514417 | 23864.9147 |
| cg08024174 | 0.03680843 | 17.870206  | 1.19320319 | 267.636113 |
| cg00106250 | 0.03681203 | 783164.747 | 2.2961155  | 2.6712E+11 |
| cg27124616 | 0.03681704 | 27.9726523 | 1.22623904 | 638.105013 |
| cg18988094 | 0.0368173  | 29250.7818 | 1.87685163 | 455874202  |

|            |            |            |            |            |
|------------|------------|------------|------------|------------|
| cg08430355 | 0.03681845 | 177539.107 | 2.09578617 | 1.504E+10  |
| cg16791210 | 0.03682358 | 232.716925 | 1.39582216 | 38799.4751 |
| cg26738010 | 0.03682669 | 0.10904545 | 0.01361728 | 0.87322178 |
| cg10169261 | 0.03682995 | 34515.3128 | 1.89471736 | 628751731  |
| cg13673567 | 0.03683677 | 1.3284E+10 | 4.15717201 | 4.2449E+19 |
| cg04793634 | 0.03684399 | 0.01497577 | 0.0002899  | 0.77363222 |
| cg12302189 | 0.03684513 | 533.529222 | 1.46752831 | 193967.931 |
| cg03386722 | 0.03684712 | 40449133.1 | 2.91465699 | 5.6135E+14 |
| cg26243475 | 0.03684813 | 4.7306E+12 | 5.94359407 | 3.77E+24   |
| cg05118960 | 0.03685053 | 6.24891861 | 1.11838103 | 34.9156351 |
| cg21515384 | 0.03685229 | 14.5221214 | 1.17744421 | 179.109982 |
| cg07744449 | 0.03685361 | 16.9577582 | 1.18862036 | 241.93222  |
| cg03687929 | 0.03685393 | 0.15819293 | 0.02800632 | 0.89354828 |
| cg08049198 | 0.03685655 | 4559.49739 | 1.67222335 | 12431961.6 |
| cg04264633 | 0.03685828 | 6.27081137 | 1.11854052 | 35.1557001 |
| cg13906792 | 0.03686144 | 9.45218352 | 1.14686006 | 77.9029422 |
| cg18903398 | 0.036869   | 0.10796181 | 0.01334988 | 0.87309779 |
| cg13151171 | 0.03687128 | 9.3664533  | 1.14609724 | 76.5471238 |
| cg10386659 | 0.03687243 | 806.594729 | 1.5036814  | 432668.156 |
| cg18875012 | 0.03688563 | 13.9829549 | 1.17421349 | 166.514036 |
| cg13913015 | 0.03689113 | 2.78018487 | 1.06420237 | 7.26311846 |
| cg08353062 | 0.03690138 | 94944713.4 | 3.05537106 | 2.9504E+15 |
| cg00897115 | 0.03690164 | 15.2734356 | 1.1802848  | 197.645377 |
| cg04750536 | 0.03690366 | 13.4257579 | 1.17103701 | 153.924234 |
| cg05945782 | 0.03690834 | 3.83680435 | 1.08514458 | 13.5659966 |
| cg06374165 | 0.03691289 | 3.17081486 | 1.07261678 | 9.37340072 |
| cg15276815 | 0.03692364 | 0.09573416 | 0.0105676  | 0.86727621 |
| cg12516270 | 0.03692611 | 12.6396264 | 1.16641877 | 136.966379 |
| cg12129480 | 0.03692757 | 0.24549837 | 0.06563044 | 0.91831542 |
| cg25194201 | 0.03693363 | 303028587  | 3.26850332 | 2.8094E+16 |

|            |            |            |            |            |
|------------|------------|------------|------------|------------|
| cg09120934 | 0.03693594 | 31.8578519 | 1.23351214 | 822.791032 |
| cg19595886 | 0.03694273 | 0.21678261 | 0.05155666 | 0.91151561 |
| cg01189638 | 0.03695526 | 15.1569035 | 1.17888    | 194.872865 |
| cg01792666 | 0.03695803 | 39749.0504 | 1.89828761 | 832322248  |
| cg16721321 | 0.03695951 | 12.0085854 | 1.16231924 | 124.067569 |
| cg20778688 | 0.03696648 | 26.4050341 | 1.21894487 | 571.991272 |
| cg26422458 | 0.03696693 | 5.63285331 | 1.11020361 | 28.579475  |
| cg05465498 | 0.03697133 | 3.93E-06   | 3.27E-11   | 0.47117531 |
| cg00402068 | 0.03697214 | 1.35E-05   | 3.60E-10   | 0.50776789 |
| cg00437134 | 0.03697437 | 2442632226 | 3.6932838  | 1.6155E+18 |
| cg12538674 | 0.03697874 | 4.27172105 | 1.09169329 | 16.7149518 |
| cg24575275 | 0.03697895 | 10.5825248 | 1.15319825 | 97.1123834 |
| cg06898463 | 0.03698363 | 133.22049  | 1.34373495 | 13207.7379 |
| cg24220907 | 0.03698923 | 23044848.5 | 2.78264579 | 1.9085E+14 |
| cg18013306 | 0.03699087 | 2.8676E+11 | 4.91547075 | 1.67E+22   |
| cg25753024 | 0.0369973  | 0.0215967  | 0.00058784 | 0.7934479  |
| cg18664866 | 0.03699802 | 164.407981 | 1.36041757 | 19868.8878 |
| cg07566700 | 0.0369991  | 7.33977943 | 1.12775926 | 47.7693813 |
| cg26837270 | 0.03700766 | 2081408.83 | 2.40349299 | 1.8025E+12 |
| cg13629565 | 0.03700933 | 42977306.2 | 2.88426225 | 6.4039E+14 |
| cg10920316 | 0.03701957 | 5.78162734 | 1.11144478 | 30.0754616 |
| cg06241292 | 0.03702398 | 5.52256764 | 1.10833948 | 27.5175195 |
| cg11826475 | 0.03703286 | 18.6717385 | 1.19251052 | 292.352826 |
| cg24616828 | 0.03703798 | 2587.22604 | 1.60397063 | 4173230.14 |
| cg18843739 | 0.03704306 | 5.72826517 | 1.11059809 | 29.5453614 |
| cg09667582 | 0.03704335 | 14.1265532 | 1.17250618 | 170.199107 |
| cg09036188 | 0.03704511 | 6.96573831 | 1.12370792 | 43.179824  |
| cg00467202 | 0.03704896 | 351.352504 | 1.42207894 | 86808.5296 |
| cg13374867 | 0.03704933 | 1503.68784 | 1.55184056 | 1457029.26 |
| cg24328964 | 0.03705795 | 145445.984 | 2.04124271 | 1.0364E+10 |



|            |            |            |            |            |
|------------|------------|------------|------------|------------|
| cg08880849 | 0.03706018 | 3.28048553 | 1.0739     | 10.0210311 |
| cg26269802 | 0.03706601 | 7.06068948 | 1.12439432 | 44.3379469 |
| cg00747944 | 0.03706733 | 4.29201456 | 1.09130573 | 16.8801358 |
| cg21443261 | 0.03707109 | 333729178  | 3.24389233 | 3.4334E+16 |
| cg15190401 | 0.03707524 | 3769.11645 | 1.6381705  | 8672014.75 |
| cg02114946 | 0.03708125 | 10.1913841 | 1.14922016 | 90.3780792 |
| cg20437660 | 0.03708587 | 0.21963028 | 0.05282123 | 0.91322106 |
| cg10799705 | 0.03709203 | 5075.81803 | 1.66647355 | 15460148.5 |
| cg21597684 | 0.03709628 | 245.83662  | 1.39009717 | 43475.8413 |
| cg00520612 | 0.03709846 | 4.43357459 | 1.09318016 | 17.9811017 |
| cg10813183 | 0.03711041 | 0.02190823 | 0.0006031  | 0.79584062 |
| cg25227227 | 0.03711071 | 2.7421E+13 | 6.35491266 | 1.18E+26   |
| cg10542419 | 0.03711332 | 2.75E-10   | 2.83E-19   | 0.26840367 |
| cg05236474 | 0.03711556 | 547083208  | 3.3266574  | 8.997E+16  |
| cg04892403 | 0.03711603 | 216.402872 | 1.37880325 | 33964.3841 |
| cg09487570 | 0.03712313 | 18391934.3 | 2.71464565 | 1.2461E+14 |
| cg15083037 | 0.03713549 | 40.5530737 | 1.24710686 | 1318.69356 |
| cg16459276 | 0.03714209 | 14.7718906 | 1.17410693 | 185.850832 |
| cg11931596 | 0.03714571 | 3.00901642 | 1.06784768 | 8.4789057  |
| cg13841734 | 0.03714657 | 239121352  | 3.15679164 | 1.8113E+16 |
| cg16841327 | 0.03714957 | 10352.1023 | 1.7345169  | 61784363.5 |
| cg02271343 | 0.03715114 | 1187.41569 | 1.52451862 | 924853.266 |
| cg27025247 | 0.03715904 | 2067862.22 | 2.37642427 | 1.7994E+12 |
| cg05096209 | 0.03716399 | 68.7136733 | 1.28618283 | 3670.99358 |
| cg09080114 | 0.03716695 | 24.6774788 | 1.21009778 | 503.246903 |
| cg24777101 | 0.03717242 | 9.14858372 | 1.14066901 | 73.374996  |
| cg01931502 | 0.03717264 | 393154.098 | 2.1509598  | 7.1861E+10 |
| cg24396358 | 0.03717601 | 16.2838364 | 1.18039235 | 224.639993 |
| cg11616676 | 0.03718597 | 18.6229215 | 1.18967532 | 291.519207 |
| cg16823406 | 0.03719057 | 112.864682 | 1.32389976 | 9621.90401 |

|            |            |            |            |            |
|------------|------------|------------|------------|------------|
| cg25130277 | 0.03721298 | 232222.921 | 2.07952258 | 2.5933E+10 |
| cg18997075 | 0.03722439 | 10.0044127 | 1.14606982 | 87.3317411 |
| cg13212159 | 0.03722515 | 996.489761 | 1.50486475 | 659854.544 |
| cg00257542 | 0.03722825 | 1684792.2  | 2.33609661 | 1.2151E+12 |
| cg15444648 | 0.03722963 | 6.26682935 | 1.11471623 | 35.2315226 |
| cg16928994 | 0.03722978 | 8452.17938 | 1.70753885 | 41837605.2 |
| cg19043574 | 0.03723362 | 4.38243514 | 1.09133992 | 17.5983096 |
| cg24742092 | 0.03723861 | 48.4821614 | 1.25796107 | 1868.51567 |
| cg21581821 | 0.03723874 | 5.72813383 | 1.10871583 | 29.5941631 |
| cg04867634 | 0.03724514 | 54.4601295 | 1.26647561 | 2341.85774 |
| cg16625170 | 0.03724594 | 1233201771 | 3.44520905 | 4.4142E+17 |
| cg00456593 | 0.03724709 | 0.09180485 | 0.00970538 | 0.86839764 |
| cg12516504 | 0.03725909 | 57163721.8 | 2.87002208 | 1.1386E+15 |
| cg22827290 | 0.03726888 | 2.71E-08   | 2.06E-15   | 0.35788175 |
| cg05054115 | 0.03727089 | 959.048153 | 1.4991219  | 613541.406 |
| cg18825419 | 0.03727693 | 7.39495776 | 1.12516065 | 48.6023044 |
| cg26672431 | 0.03727969 | 11293487.6 | 2.60370989 | 4.8985E+13 |
| cg13975303 | 0.03728398 | 770.941916 | 1.47930738 | 401776.836 |
| cg00251738 | 0.0372848  | 71452862.8 | 2.90137992 | 1.7597E+15 |
| cg10523140 | 0.03728925 | 6.78657795 | 1.11935081 | 41.1467432 |
| cg09805692 | 0.0372903  | 37.059105  | 1.23698873 | 1110.25851 |
| cg07706540 | 0.03729488 | 2.36E-06   | 1.20E-11   | 0.46654493 |
| cg01113435 | 0.0372977  | 45.9989603 | 1.25265136 | 1689.14066 |
| cg12122509 | 0.03730119 | 5.156E+10  | 4.26667856 | 6.23E+20   |
| cg04458206 | 0.03730186 | 256.685104 | 1.3858335  | 47543.4046 |
| cg08845123 | 0.03730227 | 4.29583388 | 1.08951182 | 16.9380345 |
| cg06106428 | 0.0373033  | 5.56741202 | 1.10624398 | 28.0192048 |
| cg19794507 | 0.03731052 | 5.45878445 | 1.1048958  | 26.9693556 |
| cg23910786 | 0.03732254 | 904520.427 | 2.23728818 | 3.6569E+11 |
| cg01453732 | 0.03732345 | 4610913.02 | 2.46163775 | 8.6367E+12 |

|            |            |            |            |            |
|------------|------------|------------|------------|------------|
| cg21391660 | 0.03732368 | 3638.65952 | 1.61828545 | 8181401.54 |
| cg17253307 | 0.03732737 | 173339033  | 3.04464974 | 9.8686E+15 |
| cg02893231 | 0.03732904 | 5.50039794 | 1.10521626 | 27.3741698 |
| cg01079738 | 0.03733636 | 190.917351 | 1.3606935  | 26787.3955 |
| cg17929627 | 0.03734231 | 33367.4503 | 1.84135414 | 604656497  |
| cg08574227 | 0.03737815 | 0.14756916 | 0.02435306 | 0.89420604 |
| cg22184507 | 0.03739267 | 6.42064359 | 1.11464213 | 36.9846635 |
| cg23817893 | 0.03739775 | 4.30652799 | 1.08891953 | 17.0317299 |
| cg21105875 | 0.03740345 | 2.99334847 | 1.06602204 | 8.40520618 |
| cg25096582 | 0.03740364 | 2852.45824 | 1.59030782 | 5116316.42 |
| cg01158680 | 0.03740646 | 4.49141501 | 1.0915226  | 18.4813478 |
| cg21844669 | 0.03741136 | 0.2300744  | 0.05766642 | 0.91793847 |
| cg10881110 | 0.03742002 | 8.74098003 | 1.13456164 | 67.3429538 |
| cg14522034 | 0.03742075 | 9.382681   | 1.13924241 | 77.2747765 |
| cg05160963 | 0.03742396 | 499279681  | 3.20881541 | 7.7686E+16 |
| cg07305215 | 0.03742551 | 257075.537 | 2.06484177 | 3.2006E+10 |
| cg21906605 | 0.03742728 | 68.5061387 | 1.27888243 | 3669.68137 |
| cg04164924 | 0.03743101 | 10.0672344 | 1.1437894  | 88.6082777 |
| cg23085167 | 0.03743359 | 0.23889039 | 0.06202457 | 0.92009689 |
| cg00310855 | 0.03744924 | 270.342174 | 1.38440015 | 52791.7389 |
| cg01680448 | 0.0374518  | 3.0426E+11 | 4.643843   | 1.99E+22   |
| cg02604524 | 0.03745824 | 2.63677213 | 1.05788864 | 6.57211638 |
| cg12996903 | 0.03745994 | 4.64660103 | 1.09324214 | 19.7494227 |
| cg10939691 | 0.03746498 | 8.927456   | 1.13540445 | 70.1947842 |
| cg22222281 | 0.03747705 | 3.80871871 | 1.0805768  | 13.4246249 |
| cg17300307 | 0.03748027 | 191131920  | 3.01831413 | 1.2103E+16 |
| cg21583565 | 0.0374806  | 185.462098 | 1.35332983 | 25415.9694 |
| cg09550809 | 0.03749022 | 7.76603887 | 1.12597399 | 53.5637238 |
| cg18179964 | 0.03749099 | 4.77564381 | 1.09471875 | 20.8334549 |
| cg04036714 | 0.03749724 | 312434578  | 3.10039171 | 3.1485E+16 |

|            |            |            |            |            |
|------------|------------|------------|------------|------------|
| cg07556218 | 0.03750936 | 821190.083 | 2.19681187 | 3.0697E+11 |
| cg18378490 | 0.03751266 | 5447676.01 | 2.45003672 | 1.2113E+13 |
| cg05247767 | 0.03751354 | 2623.18327 | 1.57580279 | 4366720.57 |
| cg23249140 | 0.03751933 | 5.49415783 | 1.10337235 | 27.3577368 |
| cg14589014 | 0.0375213  | 178128.166 | 2.00968248 | 1.5788E+10 |
| cg22270364 | 0.03753126 | 4.00760999 | 1.08336606 | 14.8250332 |
| cg05958352 | 0.03753148 | 5.34812804 | 1.10154658 | 25.9657413 |
| cg04321497 | 0.03753474 | 231145.405 | 2.03846846 | 2.621E+10  |
| cg20419291 | 0.03754088 | 0.13711774 | 0.02108239 | 0.89179991 |
| cg06849960 | 0.0375415  | 5.62459027 | 1.10465924 | 28.63871   |
| cg00006626 | 0.03754463 | 4.68268417 | 1.0930267  | 20.0612949 |
| cg15628562 | 0.03754601 | 105.767997 | 1.30803687 | 8552.41127 |
| cg26857670 | 0.03754793 | 4.08106388 | 1.08437615 | 15.3591375 |
| cg00747184 | 0.03755001 | 4709.48939 | 1.62750339 | 13627799.7 |
| cg22837251 | 0.03755246 | 0.10098939 | 0.0116381  | 0.87633374 |
| cg18695750 | 0.03755807 | 195.700885 | 1.35481112 | 28268.7645 |
| cg22364205 | 0.03757405 | 204.600393 | 1.35771306 | 30832.2295 |
| cg11251349 | 0.03757449 | 72512822.3 | 2.82957606 | 1.8583E+15 |
| cg11019437 | 0.03757478 | 5.2162E+10 | 4.12941746 | 6.59E+20   |
| cg19334030 | 0.03757726 | 23.6223228 | 1.19923183 | 465.30964  |
| cg02700626 | 0.03758323 | 3.62974233 | 1.07683889 | 12.2349124 |
| cg10824915 | 0.03758551 | 26.5915071 | 1.2072563  | 585.715104 |
| cg25065723 | 0.03759203 | 0.16806822 | 0.0312906  | 0.90272885 |
| cg04709129 | 0.03759338 | 0.02301642 | 0.00065774 | 0.80542018 |
| cg02197938 | 0.03759347 | 6.86751538 | 1.1168908  | 42.2268386 |
| cg09869729 | 0.03759431 | 7.517239   | 1.12268913 | 50.3335077 |
| cg05301609 | 0.03760638 | 7.33331443 | 1.12096174 | 47.97443   |
| cg15445332 | 0.03760897 | 1136978014 | 3.30273645 | 3.9141E+17 |
| cg05148093 | 0.03761797 | 393.665856 | 1.40792564 | 110071.727 |
| cg08052882 | 0.03761967 | 402.059786 | 1.40955635 | 114682.943 |

|            |            |            |            |            |
|------------|------------|------------|------------|------------|
| cg15395193 | 0.03762832 | 2397327237 | 3.43986603 | 1.6708E+18 |
| cg15283028 | 0.03763077 | 1.7352E+10 | 3.85115526 | 7.8187E+19 |
| cg00262061 | 0.03763562 | 3150.54988 | 1.58485571 | 6263008.34 |
| cg18261804 | 0.03763792 | 8.53E-05   | 1.24E-08   | 0.58535538 |
| cg04446579 | 0.03763812 | 4.77881597 | 1.09351774 | 20.8840525 |
| cg06963233 | 0.03764966 | 5.24553626 | 1.09925344 | 25.0312163 |
| cg24247086 | 0.03765102 | 748.537171 | 1.45911574 | 384005.107 |
| cg09527192 | 0.03766103 | 109.428273 | 1.30711509 | 9161.05019 |
| cg26287080 | 0.03766234 | 0.20982361 | 0.04812673 | 0.9147919  |
| cg08949408 | 0.03766807 | 3.56689019 | 1.07518685 | 11.8330183 |
| cg07632934 | 0.03767053 | 0.22067472 | 0.05307712 | 0.91748248 |
| cg04718145 | 0.03767612 | 5.39188409 | 1.10073991 | 26.4117016 |
| cg01646147 | 0.03767712 | 5169.95995 | 1.62751928 | 16422838.2 |
| cg03559686 | 0.03769029 | 5.62977792 | 1.10331737 | 28.7264575 |
| cg10103631 | 0.03769167 | 6.7745E+14 | 6.97793027 | 6.58E+28   |
| cg23858040 | 0.0376963  | 7.61857162 | 1.12240486 | 51.7127425 |
| cg02180498 | 0.03769998 | 6508.08133 | 1.64736853 | 25710775.5 |
| cg01179696 | 0.0377002  | 8.11867983 | 1.126425   | 58.5151804 |
| cg09876101 | 0.03770398 | 3407226782 | 3.4811206  | 3.3349E+18 |
| cg26466921 | 0.03770837 | 33.903201  | 1.22160069 | 940.918788 |
| cg10953436 | 0.03771444 | 5.15793208 | 1.09762171 | 24.2380986 |
| cg18147309 | 0.03771513 | 8.9321E+14 | 7.06039797 | 1.13E+29   |
| cg00408964 | 0.03771825 | 1968583.65 | 2.27640312 | 1.7024E+12 |
| cg01347596 | 0.03771833 | 47.3776785 | 1.24480985 | 1803.20265 |
| cg12598803 | 0.03772517 | 7.35871687 | 1.119874   | 48.3542918 |
| cg02407720 | 0.03772709 | 3.93625799 | 1.0808125  | 14.3356289 |
| cg09526712 | 0.03772945 | 6.18535931 | 1.10885134 | 34.5029747 |
| cg21634218 | 0.03774153 | 4.06927253 | 1.08274351 | 15.2935378 |
| cg14975318 | 0.037742   | 30190.2935 | 1.79369248 | 508143862  |
| cg26475097 | 0.0377445  | 1574751.86 | 2.24359912 | 1.1053E+12 |

|            |            |            |            |            |
|------------|------------|------------|------------|------------|
| cg09563216 | 0.03774965 | 4.34553614 | 1.08671568 | 17.3768398 |
| cg02710004 | 0.03775199 | 0.1886414  | 0.03910819 | 0.9099266  |
| cg05568384 | 0.03775406 | 236506.05  | 2.01402759 | 2.7773E+10 |
| cg13405887 | 0.03775555 | 2.92737183 | 1.06265196 | 8.06426393 |
| cg06807696 | 0.037756   | 3.60570401 | 1.07525274 | 12.0912051 |
| cg01945183 | 0.03775931 | 8.26225207 | 1.12685483 | 60.5799498 |
| cg07583490 | 0.0377619  | 7.27113144 | 1.11871204 | 47.2591252 |
| cg14559139 | 0.03776214 | 444.180127 | 1.41156256 | 139771.337 |
| cg22027947 | 0.03776955 | 8560114    | 2.46449566 | 2.9732E+13 |
| cg14328457 | 0.0377753  | 3.33646424 | 1.07041973 | 10.3996529 |
| cg16592713 | 0.03777663 | 53346887.8 | 2.7312422  | 1.042E+15  |
| cg22375689 | 0.03778247 | 0.19226861 | 0.04057279 | 0.91113339 |
| cg13716638 | 0.03778282 | 2712.27348 | 1.56235712 | 4708544.13 |
| cg07095459 | 0.03778705 | 5405704431 | 3.54101386 | 8.2523E+18 |
| cg19187185 | 0.03779162 | 23.2027228 | 1.19402384 | 450.884082 |
| cg08445694 | 0.03779273 | 0.06764161 | 0.00532592 | 0.85907953 |
| cg09551172 | 0.03779294 | 155792.179 | 1.96251495 | 1.2367E+10 |
| cg24944820 | 0.03779663 | 7.46573749 | 1.11999891 | 49.7654377 |
| cg16802592 | 0.03780047 | 4.45318484 | 1.08781525 | 18.2299846 |
| cg23752923 | 0.03781174 | 53.3361359 | 1.25091748 | 2274.12554 |
| cg05173382 | 0.03782171 | 5447720.18 | 2.39280866 | 1.2403E+13 |
| cg04254487 | 0.03782711 | 4.82046611 | 1.09245915 | 21.2702631 |
| cg17042098 | 0.03783103 | 6.5729294  | 1.11163176 | 38.8648492 |
| cg06380459 | 0.03783234 | 7637515.92 | 2.4366993  | 2.3939E+13 |
| cg23959605 | 0.03783374 | 5.76187209 | 1.10340829 | 30.0878382 |
| cg22958605 | 0.03783406 | 741.592354 | 1.44967518 | 379367.204 |
| cg01243251 | 0.03784577 | 184.070053 | 1.34009572 | 25283.1077 |
| cg04617786 | 0.037846   | 27450.5694 | 1.77474234 | 424587695  |
| cg16406225 | 0.03785179 | 4.02410385 | 1.08124172 | 14.9766805 |
| cg09987240 | 0.0378531  | 8.0170063  | 1.12385565 | 57.1891862 |

|            |            |            |            |            |
|------------|------------|------------|------------|------------|
| cg03690837 | 0.03785935 | 36.1444246 | 1.22278562 | 1068.39614 |
| cg20839219 | 0.03786239 | 624145.876 | 2.11262096 | 1.844E+11  |
| cg09516144 | 0.03786305 | 1054.29421 | 1.47715094 | 752486.587 |
| cg03979241 | 0.03786514 | 0.19942701 | 0.04353164 | 0.91361429 |
| cg25673274 | 0.03786802 | 5.3081E+11 | 4.53784382 | 6.21E+22   |
| cg05939324 | 0.0378747  | 0.21749121 | 0.0515204  | 0.91813007 |
| cg16511708 | 0.03788035 | 35950916   | 2.64742972 | 4.882E+14  |
| cg07697561 | 0.03788796 | 25480.5491 | 1.76364266 | 368134883  |
| cg11639692 | 0.03788857 | 242470.212 | 2.00038064 | 2.939E+10  |
| cg06602723 | 0.03789056 | 4.86989766 | 1.09254594 | 21.7070079 |
| cg17895873 | 0.03789775 | 3623603305 | 3.42074123 | 3.8385E+18 |
| cg04340651 | 0.03790213 | 5.31492667 | 1.09779639 | 25.7319534 |
| cg17261676 | 0.03790929 | 6.44360064 | 1.10959485 | 37.4190536 |
| cg22786741 | 0.03791685 | 1807751.15 | 2.2337381  | 1.463E+12  |
| cg24292487 | 0.03791738 | 28.6940234 | 1.20590723 | 682.761459 |
| cg19847038 | 0.0379217  | 8.12473182 | 1.12390291 | 58.7339589 |
| cg05018361 | 0.03792438 | 3.421E+10  | 3.86563632 | 3.03E+20   |
| cg08192350 | 0.03793065 | 4.88689045 | 1.09241714 | 21.8613362 |
| cg11613545 | 0.03794498 | 4.28E-05   | 3.20E-09   | 0.57134645 |
| cg05038216 | 0.037945   | 107.797153 | 1.2974796  | 8955.99913 |
| cg00174845 | 0.03794787 | 0.223348   | 0.05422251 | 0.91999301 |
| cg25022560 | 0.03794951 | 229583309  | 2.91771857 | 1.8065E+16 |
| cg26836743 | 0.03795259 | 84.5519119 | 1.27985047 | 5585.82894 |
| cg25289028 | 0.03795279 | 5.63469855 | 1.10091056 | 28.8396068 |
| cg24361586 | 0.03795352 | 0.07953439 | 0.00728183 | 0.86869933 |
| cg01068014 | 0.03796466 | 234.254338 | 1.35402861 | 40527.2787 |
| cg24514884 | 0.03797221 | 12.9541809 | 1.15278746 | 145.569595 |
| cg08044454 | 0.03797493 | 0.16337012 | 0.02951285 | 0.90434507 |
| cg20700235 | 0.03797898 | 346.251373 | 1.38317016 | 86677.7038 |
| cg08133931 | 0.03798089 | 7.75080758 | 1.12028679 | 53.6246779 |

|            |            |            |            |            |
|------------|------------|------------|------------|------------|
| cg16765160 | 0.03798429 | 116114917  | 2.80026087 | 4.8148E+15 |
| cg24042517 | 0.03799263 | 4.75387574 | 1.09022114 | 20.7291288 |
| cg17124509 | 0.0379941  | 299.383527 | 1.37147456 | 65353.3785 |
| cg26340737 | 0.03799958 | 62.7105345 | 1.25755703 | 3127.18314 |
| cg06288351 | 0.03800342 | 7.57500905 | 1.11861137 | 51.296423  |
| cg27337894 | 0.0380126  | 17.9312847 | 1.17310955 | 274.084351 |
| cg19630883 | 0.03802456 | 67580.5786 | 1.848668   | 2470500173 |
| cg02721176 | 0.03802883 | 0.28276286 | 0.08573209 | 0.93261268 |
| cg11799593 | 0.03803323 | 3.97132355 | 1.07911333 | 14.615157  |
| cg04656882 | 0.03803525 | 625.693471 | 1.42678569 | 274387.614 |
| cg13392052 | 0.03803526 | 1.9044E+10 | 3.69351653 | 9.8187E+19 |
| cg13915028 | 0.03803687 | 1383.83159 | 1.49060436 | 1284707.01 |
| cg10477603 | 0.03804153 | 40356.8841 | 1.79516357 | 907258882  |
| cg02136628 | 0.03804313 | 54700576.3 | 2.67200112 | 1.1198E+15 |
| cg02673986 | 0.0380435  | 10.4071038 | 1.13792927 | 95.1797377 |
| cg02325300 | 0.03805522 | 1984.71902 | 1.51952959 | 2592321.74 |
| cg07237214 | 0.03806161 | 14.5318468 | 1.15880281 | 182.235121 |
| cg12039184 | 0.03806228 | 464155532  | 3.00087938 | 7.1792E+16 |
| cg17266233 | 0.03806561 | 7.43346888 | 1.11675993 | 49.4792642 |
| cg24081819 | 0.03807002 | 36.309425  | 1.2185592  | 1081.91243 |
| cg27259408 | 0.03807395 | 12.8472456 | 1.15078854 | 143.424889 |
| cg19052355 | 0.03807931 | 3.75575743 | 1.07547158 | 13.1158407 |
| cg00930615 | 0.03808298 | 154.521305 | 1.31922558 | 18099.1288 |
| cg22719334 | 0.03808417 | 1335780148 | 3.17357295 | 5.6224E+17 |
| cg05934259 | 0.03808611 | 7651315.5  | 2.38925747 | 2.4502E+13 |
| cg25341925 | 0.03808625 | 8.77030534 | 1.12672579 | 68.2670591 |
| cg15447231 | 0.0380892  | 5.43442673 | 1.09745249 | 26.9104988 |
| cg10172318 | 0.03809972 | 49.6750247 | 1.23905333 | 1991.52693 |
| cg16107907 | 0.03810491 | 39.9374841 | 1.22418943 | 1302.90508 |
| cg11121935 | 0.03810552 | 124.889311 | 1.3031817  | 11968.6611 |



|            |            |            |            |            |
|------------|------------|------------|------------|------------|
| cg19077271 | 0.03810825 | 36.403207  | 1.21791076 | 1088.0875  |
| cg24216220 | 0.0381103  | 16.5973982 | 1.16653226 | 236.147458 |
| cg16643473 | 0.03811093 | 11.9480074 | 1.14568839 | 124.601839 |
| cg17207836 | 0.03811474 | 24900.2862 | 1.74162685 | 356002924  |
| cg01591369 | 0.03813074 | 8668.41748 | 1.64258864 | 45745757.6 |
| cg23341612 | 0.03813443 | 5.6266102  | 1.09912846 | 28.8034961 |
| cg02131049 | 0.03813752 | 567888221  | 3.0119087  | 1.0707E+17 |
| cg03785696 | 0.0381483  | 7.55864301 | 1.11687049 | 51.154619  |
| cg08321129 | 0.03814858 | 8.77925448 | 1.12604097 | 68.4480505 |
| cg14690220 | 0.03815139 | 8.2327E+10 | 3.94745736 | 1.72E+21   |
| cg05663031 | 0.03816807 | 5.98329742 | 1.10250569 | 32.4713498 |
| cg25057892 | 0.03817795 | 1559034.84 | 2.17525599 | 1.1174E+12 |
| cg22597665 | 0.03817977 | 531.719518 | 1.40774908 | 200835.255 |
| cg20171999 | 0.0381862  | 8.52136344 | 1.12376396 | 64.6164473 |
| cg25983317 | 0.03818633 | 113813.377 | 1.88518856 | 6871187949 |
| cg19540689 | 0.03821647 | 4.24956397 | 1.08174812 | 16.694084  |
| cg11005899 | 0.03823674 | 665931.502 | 2.06870948 | 2.1437E+11 |
| cg02024449 | 0.03823686 | 3957956334 | 3.31353955 | 4.7277E+18 |
| cg23601416 | 0.03824211 | 19.9129424 | 1.17596541 | 337.191276 |
| cg20451727 | 0.03824484 | 16297.0162 | 1.6911398  | 157049545  |
| cg16751623 | 0.03824793 | 78.2212968 | 1.26630159 | 4831.84365 |
| cg26142075 | 0.03824885 | 6899429.17 | 2.3460638  | 2.029E+13  |
| cg22622425 | 0.0382499  | 1538.9441  | 1.4879222  | 1591715.57 |
| cg02234820 | 0.03825427 | 10.2909069 | 1.13448872 | 93.3484511 |
| cg06712722 | 0.03825488 | 163.838435 | 1.31780487 | 20369.505  |
| cg02620694 | 0.03826193 | 6.27585001 | 1.10444735 | 35.6615398 |
| cg18374708 | 0.03826461 | 1409562.16 | 2.15037801 | 9.2396E+11 |
| cg23331156 | 0.0382691  | 23.7017876 | 1.18662025 | 473.424191 |
| cg13259290 | 0.03826997 | 10.5520054 | 1.13582262 | 98.0301117 |
| cg10742957 | 0.03827084 | 9.67970615 | 1.13052699 | 82.8787917 |

|            |            |            |            |            |
|------------|------------|------------|------------|------------|
| cg03314195 | 0.03827164 | 6.62043806 | 1.10754555 | 39.5741738 |
| cg10899006 | 0.03827267 | 4824772.05 | 2.29693548 | 1.0135E+13 |
| cg03591990 | 0.03827485 | 1597.31099 | 1.48958167 | 1712831.5  |
| cg27431396 | 0.03829254 | 12056.1903 | 1.6601049  | 87555747.6 |
| cg12878710 | 0.03829526 | 985.33433  | 1.45020834 | 669478.803 |
| cg15004702 | 0.03829787 | 1185.63425 | 1.46462033 | 959790.425 |
| cg05801246 | 0.03830184 | 6.17891876 | 1.10312536 | 34.6098807 |
| cg20270172 | 0.03830231 | 164343858  | 2.77175692 | 9.7443E+15 |
| cg20303850 | 0.03830304 | 7.27E-11   | 1.86E-20   | 0.28421712 |
| cg11849086 | 0.03830434 | 1551748172 | 3.12759951 | 7.6989E+17 |
| cg00415665 | 0.03830441 | 2297.2037  | 1.51741335 | 3477724.01 |
| cg26942169 | 0.03830627 | 5.83179147 | 1.09965126 | 30.9277979 |
| cg19522294 | 0.03830963 | 425606.94  | 2.00979226 | 9.0129E+10 |
| cg14077270 | 0.03831116 | 82567.9625 | 1.83975096 | 3705647432 |
| cg15929437 | 0.03831289 | 104088.595 | 1.86265793 | 5816653424 |
| cg06632759 | 0.03832047 | 0.28410785 | 0.08637145 | 0.93453642 |
| cg20422722 | 0.03832615 | 22.4519249 | 1.18212328 | 426.426699 |
| cg25604984 | 0.03832871 | 9129343.15 | 2.36704281 | 3.5211E+13 |
| cg09671109 | 0.03833138 | 5990374125 | 3.3537161  | 1.07E+19   |
| cg15917704 | 0.03833243 | 112.319305 | 1.28883955 | 9788.36061 |
| cg17777874 | 0.03833441 | 78135.8735 | 1.83194388 | 3332642872 |
| cg18927077 | 0.03833684 | 7.03773835 | 1.11051867 | 44.6005657 |
| cg24269840 | 0.0383387  | 6.06126332 | 1.10162499 | 33.3497457 |
| cg17782954 | 0.03833968 | 4.43802292 | 1.08332653 | 18.181081  |
| cg16523137 | 0.03834098 | 125.705999 | 1.29640056 | 12189.1325 |
| cg16904330 | 0.0383419  | 5.13046962 | 1.09177601 | 24.1090831 |
| cg20001810 | 0.03834383 | 5.33282463 | 1.09402889 | 25.9947602 |
| cg07540542 | 0.03834391 | 487.157368 | 1.39410109 | 170233.208 |
| cg15133313 | 0.03834643 | 1736.70598 | 1.49242617 | 2020969.42 |
| cg26149131 | 0.03835836 | 0.01002037 | 0.00012852 | 0.7812927  |

|            |            |            |            |            |
|------------|------------|------------|------------|------------|
| cg19621160 | 0.03835912 | 45.0286618 | 1.22644679 | 1653.21513 |
| cg04743859 | 0.03836285 | 7.23546589 | 1.111893   | 47.0836372 |
| cg16416718 | 0.03836382 | 46187.226  | 1.77816623 | 1199696521 |
| cg01755539 | 0.03837202 | 1.2389E+10 | 3.47123009 | 4.42E+19   |
| cg08798701 | 0.03839419 | 0.00042555 | 2.74E-07   | 0.66045837 |
| cg19720565 | 0.03839436 | 9.26132655 | 1.12631483 | 76.1529255 |
| cg10944735 | 0.03840156 | 8.91893306 | 1.12396306 | 70.7740051 |
| cg10297105 | 0.03841902 | 10.5990261 | 1.1341422  | 99.0522655 |
| cg04834794 | 0.03842832 | 4443.83172 | 1.56434957 | 12623547   |
| cg22711917 | 0.03842988 | 4512211.39 | 2.26183505 | 9.0016E+12 |
| cg20585530 | 0.03844306 | 4.08773601 | 1.07778625 | 15.5036175 |
| cg02084834 | 0.03844492 | 16267943   | 2.41878906 | 1.0941E+14 |
| cg25723986 | 0.03845462 | 24.2028798 | 1.18453402 | 494.523062 |
| cg24930634 | 0.03845585 | 234776325  | 2.78496344 | 1.9792E+16 |
| cg07575519 | 0.03846053 | 11.1891046 | 1.13686634 | 110.123817 |
| cg05132828 | 0.03846071 | 11.8033973 | 1.140096   | 122.2004   |
| cg04805577 | 0.03848931 | 6.5997586  | 1.10513703 | 39.4130432 |
| cg16696007 | 0.03849119 | 3.42E-06   | 2.28E-11   | 0.51342657 |
| cg24404909 | 0.03849413 | 29.0501191 | 1.19530491 | 706.020205 |
| cg27299660 | 0.03850238 | 0.00030092 | 1.39E-07   | 0.65112399 |
| cg04319732 | 0.0385061  | 8.48978286 | 1.11978328 | 64.3663949 |
| cg25518276 | 0.03850771 | 8.05774035 | 1.11667564 | 58.1432758 |
| cg01860010 | 0.03850789 | 505895.442 | 2.00293373 | 1.2778E+11 |
| cg04781638 | 0.03850978 | 9.34925605 | 1.1254645  | 77.6644564 |
| cg14881284 | 0.03851606 | 2009806.38 | 2.15327206 | 1.8759E+12 |
| cg09624525 | 0.03852463 | 7558.56746 | 1.6025047  | 35651653.3 |
| cg05946827 | 0.0385308  | 342.172551 | 1.36064072 | 86049.2072 |
| cg13611783 | 0.0385316  | 1015.11363 | 1.44097164 | 715111.705 |
| cg18829186 | 0.03854371 | 1624.01073 | 1.4765048  | 1786252.81 |
| cg23737062 | 0.03855226 | 7.02655564 | 1.1081479  | 44.5540565 |

|            |            |            |            |            |
|------------|------------|------------|------------|------------|
| cg12747487 | 0.038553   | 5707052.39 | 2.26899845 | 1.4355E+13 |
| cg23678322 | 0.03855395 | 93.4972479 | 1.26994584 | 6883.54976 |
| cg13235098 | 0.0385547  | 0.0057876  | 4.39E-05   | 0.76239146 |
| cg00037314 | 0.03856301 | 0.0365298  | 0.00158827 | 0.84017624 |
| cg12318400 | 0.03856385 | 1.3926E+10 | 3.41742001 | 5.6745E+19 |
| cg09934977 | 0.03856607 | 25.8527674 | 1.18659152 | 563.265094 |
| cg06289844 | 0.03856741 | 5.1354385  | 1.08986675 | 24.198122  |
| cg00173435 | 0.03856763 | 47106.1182 | 1.7610808  | 1260013946 |
| cg08905031 | 0.03857307 | 14269763   | 2.3773602  | 8.5652E+13 |
| cg20313969 | 0.03857429 | 5.48304331 | 1.09356513 | 27.4915166 |
| cg10115182 | 0.03857533 | 384903.133 | 1.96585067 | 7.5362E+10 |
| cg22432024 | 0.03859062 | 0.06048035 | 0.00423811 | 0.86308959 |
| cg06524337 | 0.03859156 | 169.763579 | 1.30923577 | 22012.592  |
| cg14831166 | 0.03859187 | 21.8676719 | 1.17573163 | 406.721277 |
| cg09242541 | 0.03859595 | 8.28714728 | 1.11731707 | 61.4658202 |
| cg27332337 | 0.03859949 | 8.74837916 | 1.12045414 | 68.3063547 |
| cg00328058 | 0.03860098 | 0.04287995 | 0.00216881 | 0.84778595 |
| cg21420622 | 0.0386019  | 700934.404 | 2.02523307 | 2.4259E+11 |
| cg12855522 | 0.03860194 | 4.19393695 | 1.07805884 | 16.3155354 |
| cg11209279 | 0.0386095  | 169453436  | 2.69851418 | 1.0641E+16 |
| cg10840064 | 0.03861451 | 1581.8005  | 1.47071047 | 1701281.71 |
| cg03008269 | 0.03861727 | 4600.51975 | 1.55509789 | 13609935.5 |
| cg17814457 | 0.03862268 | 2150284.23 | 2.14464864 | 2.1559E+12 |
| cg00307214 | 0.03862609 | 6.60492257 | 1.10379143 | 39.5228671 |
| cg14673936 | 0.03863049 | 9.02879693 | 1.12193632 | 72.6593595 |
| cg14032725 | 0.03863253 | 2075.71208 | 1.49078825 | 2890135.9  |
| cg24775616 | 0.03863507 | 0.00017123 | 4.61E-08   | 0.6355424  |
| cg15377585 | 0.03863595 | 5.03846271 | 1.08818628 | 23.3288242 |
| cg21773314 | 0.03864099 | 4121.61319 | 1.54468701 | 10997499.9 |
| cg04309480 | 0.03864136 | 0.20556654 | 0.04589792 | 0.92068671 |

|            |            |            |            |            |
|------------|------------|------------|------------|------------|
| cg09693228 | 0.0386449  | 13796581.7 | 2.35952553 | 8.0671E+13 |
| cg08282512 | 0.03865247 | 0.03914618 | 0.00181474 | 0.8444325  |
| cg04082020 | 0.03865356 | 371.142172 | 1.36165725 | 101160.928 |
| cg21410293 | 0.03865858 | 14.0219315 | 1.14764505 | 171.320012 |
| cg10409799 | 0.03866847 | 802394.922 | 2.03066082 | 3.1706E+11 |
| cg16391783 | 0.03867459 | 28.6030817 | 1.19080405 | 687.045268 |
| cg14360865 | 0.03868201 | 6.92951208 | 1.10598143 | 43.4167668 |
| cg21220708 | 0.03869687 | 309.705067 | 1.34722983 | 71195.8914 |
| cg02002586 | 0.03869875 | 10.1692478 | 1.1280656  | 91.6733932 |
| cg05797295 | 0.03869925 | 95181874.5 | 2.59723857 | 3.4882E+15 |
| cg07571928 | 0.038703   | 10.1036988 | 1.1276327  | 90.5301243 |
| cg04450855 | 0.03871283 | 14.6599935 | 1.14949552 | 186.964982 |
| cg10951691 | 0.03871503 | 10.8539723 | 1.13167732 | 104.100976 |
| cg22005150 | 0.03871535 | 74.1382763 | 1.25028243 | 4396.19393 |
| cg09173265 | 0.03873137 | 1487104.67 | 2.08788994 | 1.0592E+12 |
| cg21344215 | 0.0387327  | 10382095   | 2.30874375 | 4.6687E+13 |
| cg07803811 | 0.03873371 | 1.174E+17  | 7.65525486 | 1.80E+33   |
| cg12945194 | 0.03873496 | 7.37599145 | 1.10900921 | 49.0575275 |
| cg11050622 | 0.03873521 | 191.636838 | 1.31275138 | 27975.3489 |
| cg25206536 | 0.03873548 | 6.26261891 | 1.09964745 | 35.6663363 |
| cg03775802 | 0.03874095 | 0.19264543 | 0.04041395 | 0.91830331 |
| cg07286413 | 0.0387434  | 91028316.8 | 2.58103468 | 3.2104E+15 |
| cg12619165 | 0.03874347 | 0.27850306 | 0.08286732 | 0.93600172 |
| cg21097788 | 0.03875254 | 0.14174976 | 0.02222827 | 0.90393869 |
| cg05708497 | 0.03876155 | 10.5470426 | 1.12939177 | 98.4955879 |
| cg02670343 | 0.03876327 | 20.1360493 | 1.16772136 | 347.223658 |
| cg23173307 | 0.03876449 | 7.21115188 | 1.10739761 | 46.9575797 |
| cg25056994 | 0.03877547 | 5300375.24 | 2.2225646  | 1.264E+13  |
| cg02007844 | 0.03877895 | 5.44466924 | 1.09131605 | 27.1639212 |
| cg06957181 | 0.03878209 | 0.13579453 | 0.02043922 | 0.90219442 |

|            |            |            |            |            |
|------------|------------|------------|------------|------------|
| cg23169269 | 0.03878899 | 0.1173716  | 0.01538363 | 0.89550338 |
| cg07109490 | 0.03878932 | 0.22890655 | 0.05653319 | 0.9268574  |
| cg19784449 | 0.03879667 | 535.759521 | 1.38192558 | 207708.917 |
| cg13421439 | 0.0387982  | 4.01710501 | 1.07419808 | 15.0224925 |
| cg21667061 | 0.03879934 | 7.06006226 | 1.10582095 | 45.0746381 |
| cg20502259 | 0.03881373 | 143.210166 | 1.29064997 | 15890.5605 |
| cg17230002 | 0.03881516 | 0.01995934 | 0.00048713 | 0.817798   |
| cg13554714 | 0.03881571 | 136.827679 | 1.2875685  | 14540.4411 |
| cg06980169 | 0.03881903 | 6.08200246 | 1.09717696 | 33.7144828 |
| cg06432479 | 0.03882079 | 36.8562924 | 1.20353503 | 1128.66369 |
| cg20929143 | 0.03882158 | 350454.906 | 1.92646185 | 6.3753E+10 |
| cg02924834 | 0.03882196 | 9.45171185 | 1.12227251 | 79.6017513 |
| cg03339668 | 0.03882364 | 5.79067201 | 1.0943708  | 30.6403299 |
| cg02019444 | 0.03882605 | 0.15177188 | 0.02537565 | 0.90774846 |
| cg13444964 | 0.0388321  | 1062911.2  | 2.0379783  | 5.5436E+11 |
| cg19257562 | 0.03883567 | 24.4003824 | 1.17803619 | 505.399296 |
| cg22773661 | 0.03884585 | 2.53936367 | 1.04890956 | 6.14768718 |
| cg17762617 | 0.03884633 | 378.474586 | 1.35547718 | 105677.185 |
| cg24727290 | 0.03884897 | 12.2286407 | 1.13684332 | 131.53937  |
| cg27301328 | 0.03885293 | 985.237051 | 1.42326395 | 682018.288 |
| cg04410756 | 0.03886038 | 8.9030676  | 1.1183743  | 70.8748521 |
| cg00971933 | 0.03887913 | 3.3355E+11 | 3.87775507 | 2.87E+22   |
| cg01443318 | 0.03888411 | 8.35025666 | 1.1144391  | 62.5667085 |
| cg17800649 | 0.03888621 | 227642.132 | 1.876954   | 2.7609E+10 |
| cg20726001 | 0.03889326 | 19.8574461 | 1.16467908 | 338.563792 |
| cg13010199 | 0.03889965 | 7026.81482 | 1.57072949 | 31435155.9 |
| cg12178578 | 0.03890304 | 6.94199036 | 1.10378269 | 43.6600705 |
| cg01154849 | 0.03890938 | 1082908.01 | 2.02930857 | 5.7788E+11 |
| cg14264773 | 0.03891048 | 644.85897  | 1.39018948 | 299126.915 |
| cg24776411 | 0.03892274 | 4.945E+10  | 3.49921899 | 6.99E+20   |

|            |            |            |            |            |
|------------|------------|------------|------------|------------|
| cg22753661 | 0.03892386 | 263.45838  | 1.32775888 | 52276.2976 |
| cg14771938 | 0.03892594 | 681.022328 | 1.39337516 | 332854.658 |
| cg25512791 | 0.03892849 | 19.4844202 | 1.16296168 | 326.444661 |
| cg02372786 | 0.03893433 | 5.73586    | 1.09280909 | 30.1059812 |
| cg03462943 | 0.03893557 | 14.6210163 | 1.14600191 | 186.539059 |
| cg00012386 | 0.03893821 | 207.881696 | 1.31136686 | 32954.0121 |
| cg01444765 | 0.03894731 | 4.158E+10  | 3.45839711 | 5.00E+20   |
| cg01090821 | 0.03894917 | 18.9053916 | 1.16083667 | 307.8933   |
| cg22999786 | 0.03895066 | 14.87199   | 1.14676637 | 192.869351 |
| cg00871371 | 0.03895077 | 4.70504121 | 1.0817307  | 20.4648096 |
| cg26434278 | 0.0389585  | 144005.055 | 1.82595934 | 1.1357E+10 |
| cg04849129 | 0.03896558 | 1.3895E+10 | 3.26450575 | 5.9139E+19 |
| cg14330641 | 0.03896877 | 4.39647762 | 1.07787527 | 17.9325159 |
| cg02882968 | 0.03897146 | 0.12507455 | 0.01737992 | 0.90009853 |
| cg13800542 | 0.03897287 | 310920.913 | 1.896937   | 5.0962E+10 |
| cg22669260 | 0.0389779  | 930.381592 | 1.41321819 | 612509.742 |
| cg20942223 | 0.03897906 | 6.23025298 | 1.09697353 | 35.3846752 |
| cg19047292 | 0.03898683 | 3.75767032 | 1.06921482 | 13.2060331 |
| cg13660163 | 0.03899047 | 29.719455  | 1.18698018 | 744.111842 |
| cg17480669 | 0.0389941  | 89.3103175 | 1.2547548  | 6356.88567 |
| cg04525496 | 0.03899877 | 7.45127949 | 1.10673852 | 50.1668326 |
| cg26693601 | 0.03900788 | 7.73829464 | 1.10875248 | 54.0077295 |
| cg11006995 | 0.03900996 | 9.90994588 | 1.12265037 | 87.477838  |
| cg09789590 | 0.03901123 | 6.25494929 | 1.09687909 | 35.6688272 |
| cg21359793 | 0.03901529 | 6.37807418 | 1.09791799 | 37.051793  |
| cg19826026 | 0.03901749 | 4.04800221 | 1.07302212 | 15.2711875 |
| cg16662919 | 0.03902242 | 1.68E+11   | 3.67752503 | 7.67E+21   |
| cg03051392 | 0.03902349 | 16.5787272 | 1.15195998 | 238.597001 |
| cg12339905 | 0.03902721 | 6.045843   | 1.09484684 | 33.3856902 |
| cg06232807 | 0.03902733 | 0.23799066 | 0.06088569 | 0.93026045 |

|            |            |            |            |            |
|------------|------------|------------|------------|------------|
| cg06969845 | 0.03902781 | 0.13602076 | 0.02045684 | 0.90442334 |
| cg01005506 | 0.0390359  | 22.2216402 | 1.16886808 | 422.4611   |
| cg11782550 | 0.03903885 | 4.32536594 | 1.07644918 | 17.3800964 |
| cg25893515 | 0.0390418  | 26717512.7 | 2.36308898 | 3.0207E+14 |
| cg03882777 | 0.03904328 | 5.39131178 | 1.08840454 | 26.705367  |
| cg23719318 | 0.03904795 | 3.16390467 | 1.05959626 | 9.44727075 |
| cg20497205 | 0.03905134 | 776.39839  | 1.39702237 | 431485.189 |
| cg24333845 | 0.03905371 | 7.62137845 | 1.107401   | 52.4520111 |
| cg22168205 | 0.0390577  | 6.76661355 | 1.10076301 | 41.5957465 |
| cg08832136 | 0.03905977 | 3271.24868 | 1.50121279 | 7128281.85 |
| cg26463170 | 0.03906637 | 86.714142  | 1.25092738 | 6011.01432 |
| cg14572436 | 0.03906863 | 45.6414209 | 1.21124022 | 1719.83993 |
| cg12566415 | 0.03907804 | 115448.236 | 1.79344691 | 7431664221 |
| cg16961545 | 0.0390783  | 76.5020055 | 1.24277665 | 4709.25878 |
| cg13919148 | 0.03907846 | 3478562.26 | 2.12712138 | 5.6886E+12 |
| cg09667013 | 0.0390805  | 7.70124257 | 1.10768725 | 53.5432155 |
| cg15140562 | 0.03908412 | 264.64675  | 1.32231313 | 52966.2003 |
| cg21008401 | 0.03908564 | 35725.3513 | 1.69041319 | 755022936  |
| cg05092885 | 0.03909403 | 21995.2681 | 1.64918025 | 293352907  |
| cg03536654 | 0.03909974 | 451.846271 | 1.35759032 | 150387.823 |
| cg20232291 | 0.03910429 | 9.45426222 | 1.11883729 | 79.8892519 |
| cg26523099 | 0.03910552 | 6.11568129 | 1.09472712 | 34.1651878 |
| cg01244346 | 0.039114   | 104.561779 | 1.26137343 | 8667.66757 |
| cg25418406 | 0.03911663 | 984349.491 | 1.99163605 | 4.8651E+11 |
| cg03321133 | 0.03911786 | 7.97805112 | 1.10923136 | 57.3814461 |
| cg02696790 | 0.03912364 | 4804.54373 | 1.52645019 | 15122432.8 |
| cg01466164 | 0.03912527 | 0.19031324 | 0.03934419 | 0.92057124 |
| cg15971518 | 0.03913009 | 0.18526163 | 0.03733183 | 0.91937293 |
| cg23157190 | 0.03913212 | 33.6545033 | 1.19158086 | 950.523484 |
| cg07196758 | 0.03914363 | 4415586.2  | 2.14231835 | 9.1011E+12 |



|            |            |            |            |            |
|------------|------------|------------|------------|------------|
| cg01566283 | 0.03914489 | 11.5446957 | 1.12952102 | 117.996918 |
| cg16985259 | 0.0391533  | 8.569E+13  | 4.93322062 | 1.49E+27   |
| cg18251245 | 0.03915797 | 1833347.47 | 2.04851855 | 1.6408E+12 |
| cg21745091 | 0.03916207 | 413733588  | 2.6809909  | 6.3848E+16 |
| cg12793610 | 0.03917217 | 8.66410583 | 1.11317596 | 67.4347383 |
| cg26649219 | 0.03917281 | 1.12E-08   | 3.14E-16   | 0.40300525 |
| cg08970330 | 0.03917541 | 594291276  | 2.72612604 | 1.2955E+17 |
| cg11579905 | 0.03917602 | 15.878945  | 1.14711225 | 219.804901 |
| cg10937776 | 0.03917911 | 1155.34272 | 1.41899121 | 940680.096 |
| cg04856117 | 0.03918268 | 64.1674304 | 1.22928461 | 3349.47586 |
| cg19511862 | 0.03919137 | 2.2413E+13 | 4.58874846 | 1.09E+26   |
| cg00851532 | 0.03919619 | 4.8479063  | 1.08134007 | 21.7343241 |
| cg00102996 | 0.03919623 | 124285.008 | 1.78803544 | 8638958061 |
| cg24578679 | 0.03919832 | 5.09366242 | 1.08397409 | 23.93544   |
| cg06452665 | 0.03920736 | 3.80440855 | 1.06835597 | 13.5474737 |
| cg20945738 | 0.03921069 | 9.05461705 | 1.1151572  | 73.5197599 |
| cg23375552 | 0.03921268 | 9.2792152  | 1.11648576 | 77.1204058 |
| cg09455126 | 0.03921323 | 0.1819822  | 0.03602922 | 0.91918508 |
| cg26551026 | 0.03921479 | 5.03637196 | 1.08322734 | 23.4161764 |
| cg23481605 | 0.03921848 | 10.9691289 | 1.12568733 | 106.887397 |
| cg13819787 | 0.03922089 | 5.04804955 | 1.08329962 | 23.5233207 |
| cg06152533 | 0.03922164 | 8.98767898 | 1.11461809 | 72.4717949 |
| cg07774251 | 0.03923456 | 6.8280758  | 1.09945152 | 42.4053431 |
| cg09970396 | 0.03923917 | 264958.74  | 1.85154937 | 3.7916E+10 |
| cg20499859 | 0.03923929 | 29556853.4 | 2.33634403 | 3.7392E+14 |
| cg08209184 | 0.03924454 | 0.00312415 | 1.30E-05   | 0.75244655 |
| cg20799547 | 0.03924924 | 3.7283E+11 | 3.7177505  | 3.74E+22   |
| cg19112186 | 0.03926033 | 6.57892526 | 1.09717851 | 39.4486924 |
| cg07489553 | 0.0392612  | 3.714E+12  | 4.156746   | 3.32E+24   |
| cg16544736 | 0.03927572 | 22252.1556 | 1.6356668  | 302725732  |

|            |            |            |            |            |
|------------|------------|------------|------------|------------|
| cg12242338 | 0.03927711 | 0.25946212 | 0.07193582 | 0.93584248 |
| cg26823630 | 0.03928192 | 47853.5703 | 1.69785496 | 1348739584 |
| cg23188547 | 0.03928363 | 9001.67467 | 1.56395137 | 51811167.7 |
| cg01119512 | 0.03928737 | 358.284429 | 1.33477814 | 96171.5866 |
| cg25117523 | 0.03928926 | 19.221849  | 1.15616766 | 319.572577 |
| cg10705060 | 0.03929401 | 33.215647  | 1.18753654 | 929.04864  |
| cg20373747 | 0.03929507 | 19.7207357 | 1.15752589 | 335.981612 |
| cg13560136 | 0.03930036 | 810612065  | 2.73432791 | 2.4031E+17 |
| cg24036523 | 0.03930714 | 7.07299908 | 1.10060916 | 45.4542065 |
| cg01758575 | 0.03931367 | 66.1109649 | 1.22783866 | 3559.63679 |
| cg05585556 | 0.0393284  | 36.3821887 | 1.1921414  | 1110.32438 |
| cg21741010 | 0.03932871 | 8.10897982 | 1.10776403 | 59.3588094 |
| cg02585745 | 0.03933616 | 22.5763624 | 1.16450977 | 437.688162 |
| cg25692259 | 0.0393443  | 4518577.88 | 2.11309623 | 9.6624E+12 |
| cg26363065 | 0.03935545 | 14770.7264 | 1.59712639 | 136604315  |
| cg16011258 | 0.03935851 | 548239956  | 2.66725935 | 1.1269E+17 |
| cg26975459 | 0.03936253 | 461.526784 | 1.34846649 | 157962.377 |
| cg19476445 | 0.03938108 | 30.8267345 | 1.181489   | 804.31351  |
| cg03277051 | 0.03938283 | 338.856234 | 1.32755527 | 86492.4797 |
| cg00978822 | 0.03938578 | 7.93424462 | 1.10595253 | 56.9212837 |
| cg24616138 | 0.03939363 | 289.711249 | 1.31708646 | 63725.9667 |
| cg02383154 | 0.03939705 | 8.53466846 | 1.10975268 | 65.636756  |
| cg03711682 | 0.03939808 | 864.259908 | 1.388716   | 537867.49  |
| cg09278980 | 0.03940142 | 3.80535965 | 1.06702998 | 13.571092  |
| cg20038219 | 0.03940416 | 6.87159833 | 1.09805927 | 43.0021082 |
| cg07708721 | 0.03940544 | 8.00595837 | 1.10621797 | 57.9409948 |
| cg18427856 | 0.03941207 | 0.21943425 | 0.05182661 | 0.92908625 |
| cg10598356 | 0.03941642 | 139635075  | 2.48214388 | 7.8553E+15 |
| cg24334259 | 0.03942132 | 15.1305589 | 1.14068394 | 200.698725 |
| cg16403932 | 0.03942177 | 0.2488941  | 0.06626614 | 0.93484052 |

|            |            |            |            |            |
|------------|------------|------------|------------|------------|
| cg12754854 | 0.03943204 | 13.6813601 | 1.13497934 | 164.918962 |
| cg09935495 | 0.03943331 | 38.3759097 | 1.19304749 | 1234.41058 |
| cg08359167 | 0.03943677 | 196.102514 | 1.29092905 | 29789.5505 |
| cg09760963 | 0.03943717 | 4.6059596  | 1.07668294 | 19.70391   |
| cg23042775 | 0.03943866 | 10.0447646 | 1.11804992 | 90.2439996 |
| cg07199534 | 0.03944256 | 10.4436093 | 1.12010811 | 97.3736142 |
| cg17601287 | 0.03944847 | 11.9029652 | 1.1271344  | 125.699812 |
| cg01022780 | 0.03946858 | 6.51937238 | 1.09462006 | 38.8282818 |
| cg01476047 | 0.03947487 | 43.2514466 | 1.19906598 | 1560.12068 |
| cg17868052 | 0.03949298 | 26.3579579 | 1.17045092 | 593.567775 |
| cg11390445 | 0.03950226 | 1.2273E+10 | 3.05406414 | 4.9318E+19 |
| cg01640991 | 0.0395061  | 0.03661345 | 0.0015714  | 0.85308961 |
| cg11530564 | 0.03950749 | 19.6382976 | 1.15375727 | 334.266784 |
| cg14597214 | 0.03951466 | 4.10496004 | 1.07013646 | 15.7463067 |
| cg10276465 | 0.03951551 | 23.1861554 | 1.16285643 | 462.307976 |
| cg02533281 | 0.03951618 | 38.3446124 | 1.19126144 | 1234.24569 |
| cg15095906 | 0.03951991 | 14.5111338 | 1.1369278  | 185.212294 |
| cg10509187 | 0.03952062 | 5.47537133 | 1.08498317 | 27.6314803 |
| cg11483915 | 0.03952157 | 19.2381959 | 1.15238553 | 321.16698  |
| cg04064380 | 0.03952284 | 13.2937818 | 1.13211727 | 156.100997 |
| cg09948350 | 0.03953149 | 0.05069225 | 0.00296443 | 0.86684545 |
| cg07068756 | 0.03953204 | 2.77124866 | 1.05005381 | 7.31373866 |
| cg01504836 | 0.03953351 | 20774032   | 2.24170992 | 1.9251E+14 |
| cg12601909 | 0.03953513 | 6.01394807 | 1.08974058 | 33.1891571 |
| cg04880506 | 0.03954436 | 11204062.1 | 2.17452157 | 5.7728E+13 |
| cg13643509 | 0.03954784 | 110.16615  | 1.25225452 | 9691.78414 |
| cg10327769 | 0.03954969 | 9.41616162 | 1.11322237 | 79.6463513 |
| cg08390699 | 0.03955265 | 88.4997101 | 1.23907462 | 6321.00648 |
| cg22171758 | 0.03955362 | 37.3253013 | 1.1889445  | 1171.77725 |
| cg14597908 | 0.03955527 | 27.9563499 | 1.17259615 | 666.518903 |

|             |            |            |            |            |
|-------------|------------|------------|------------|------------|
| cg09378756  | 0.03956468 | 0.09620779 | 0.01035098 | 0.8942086  |
| cg25425705  | 0.03956576 | 32.2028125 | 1.18034251 | 878.576452 |
| cg09339907  | 0.03957114 | 3413.24141 | 1.47445481 | 7901372.64 |
| cg22416074  | 0.03957297 | 2759.92057 | 1.45947696 | 5219103.66 |
| cg23562261  | 0.03957475 | 4.54147407 | 1.0748685  | 19.1883814 |
| cg111120874 | 0.03957674 | 4.76348217 | 1.0773027  | 21.062569  |
| cg25538340  | 0.03957942 | 41.8150416 | 1.19486386 | 1463.3447  |
| cg22242926  | 0.03958176 | 41267740.6 | 2.30721835 | 7.3813E+14 |
| cg25877553  | 0.03958445 | 5.33216067 | 1.0830464  | 26.2518185 |
| cg20196910  | 0.03958944 | 21717.8135 | 1.60918309 | 293107372  |
| cg02611085  | 0.03959169 | 9.14348815 | 1.11116064 | 75.2396839 |
| cg22665276  | 0.03959345 | 33.4190113 | 1.18188015 | 944.960716 |
| cg10917941  | 0.0395989  | 72.068368  | 1.22579562 | 4237.12532 |
| cg03246824  | 0.03960054 | 2.8562E+10 | 3.14450917 | 2.59E+20   |
| cg18048949  | 0.0396074  | 4969.08037 | 1.49889119 | 16473350.3 |
| cg03379706  | 0.03961015 | 12.5204197 | 1.12766703 | 139.013472 |
| cg13703021  | 0.03961799 | 0.02466066 | 0.00072509 | 0.83871908 |
| cg07895169  | 0.03962315 | 5735186.77 | 2.09352623 | 1.5711E+13 |
| cg19861329  | 0.03962442 | 4.4071E+10 | 3.20104732 | 6.07E+20   |
| cg10376408  | 0.03962781 | 9.51821761 | 1.11285176 | 81.4092856 |
| cg18832152  | 0.03962949 | 13.7656493 | 1.13248472 | 167.325084 |
| cg20646950  | 0.03963418 | 47.0277157 | 1.20035633 | 1842.45794 |
| cg06796435  | 0.03963696 | 6.99913851 | 1.09664056 | 44.6709174 |
| cg06887580  | 0.03963715 | 13.7400415 | 1.13227515 | 166.733978 |
| cg14105409  | 0.0396424  | 155.414504 | 1.27011502 | 19016.9141 |
| cg05566582  | 0.03964432 | 0.10901477 | 0.01319989 | 0.9003274  |
| cg27410595  | 0.03966108 | 0.14641145 | 0.02347545 | 0.91313743 |
| cg04985097  | 0.03966113 | 356632.879 | 1.8305817  | 6.9479E+10 |
| cg10682057  | 0.03966915 | 13312.7787 | 1.56637481 | 113146658  |
| cg03137131  | 0.03966971 | 5.58133459 | 1.08464017 | 28.7203966 |

|            |            |            |            |            |
|------------|------------|------------|------------|------------|
| cg04505439 | 0.0396708  | 2321.38179 | 1.44219579 | 3736533.86 |
| cg18909638 | 0.03968615 | 0.00090691 | 1.14E-06   | 0.7185818  |
| cg16127617 | 0.03968619 | 12.8214781 | 1.12788699 | 145.750684 |
| cg04948906 | 0.03969174 | 0.15318603 | 0.02563615 | 0.91534646 |
| cg09490277 | 0.03969897 | 7.12031294 | 1.09689006 | 46.2205451 |
| cg03572619 | 0.0397088  | 714.875532 | 1.36249227 | 375082.514 |
| cg02492799 | 0.03970931 | 22.3932117 | 1.15754995 | 433.204575 |
| cg15021531 | 0.03971075 | 25.2930824 | 1.16417671 | 549.5214   |
| cg24296484 | 0.0397417  | 1988.7235  | 1.42798828 | 2769645.4  |
| cg13164831 | 0.03975893 | 0.06263831 | 0.004467   | 0.8783421  |
| cg04510564 | 0.03976078 | 3.94350016 | 1.06634077 | 14.5836997 |
| cg01892327 | 0.03976409 | 1223520.46 | 1.9270494  | 7.7684E+11 |
| cg06081199 | 0.03976602 | 5.23527064 | 1.0805349  | 25.3652693 |
| cg20199347 | 0.03978484 | 8.12706671 | 1.10279038 | 59.8928086 |
| cg25291004 | 0.03978914 | 5.4629933  | 1.08248524 | 27.5701643 |
| cg10208594 | 0.03978917 | 53925764.6 | 2.29565092 | 1.2667E+15 |
| cg23121993 | 0.03979198 | 2.62459625 | 1.0460571  | 6.58520984 |
| cg19624799 | 0.03979402 | 748.728433 | 1.36176115 | 411668.571 |
| cg27079322 | 0.03980138 | 7.01696024 | 1.09508276 | 44.9625661 |
| cg03612039 | 0.03981731 | 5.082705   | 1.07860797 | 23.9511396 |
| cg07835283 | 0.03982143 | 13.9881211 | 1.13058734 | 173.067153 |
| cg15153018 | 0.0398225  | 30250.256  | 1.6159722  | 566270872  |
| cg03553278 | 0.0398415  | 3.8689355  | 1.06482885 | 14.0573406 |
| cg10512875 | 0.03984362 | 3.17684745 | 1.05511747 | 9.56515264 |
| cg10788735 | 0.03984464 | 4.38883298 | 1.07105634 | 17.9839792 |
| cg11609154 | 0.03985209 | 829.956139 | 1.36575505 | 504356.32  |
| cg26337868 | 0.03985973 | 8.94336843 | 1.10685687 | 72.2621338 |
| cg05172068 | 0.03986231 | 2000720.11 | 1.95844639 | 2.0439E+12 |
| cg25492727 | 0.03986831 | 2.14E-08   | 1.04E-15   | 0.4414781  |
| cg19949241 | 0.03986986 | 0.15869858 | 0.02742532 | 0.9183207  |

|            |            |            |            |            |
|------------|------------|------------|------------|------------|
| cg15928480 | 0.03988656 | 33.1415142 | 1.17559116 | 934.304379 |
| cg02083999 | 0.03989138 | 4198.50045 | 1.47007332 | 11990834.7 |
| cg01780109 | 0.03990533 | 2289.44872 | 1.42872964 | 3668696.53 |
| cg03642503 | 0.03990879 | 11.0271057 | 1.11701948 | 108.858495 |
| cg01965047 | 0.03991111 | 5.34144205 | 1.0802873  | 26.4105697 |
| cg26894854 | 0.03991376 | 14.6899908 | 1.13181511 | 190.663501 |
| cg24425171 | 0.03992148 | 5.24243879 | 1.07926702 | 25.464657  |
| cg12811072 | 0.03992515 | 4.15438554 | 1.06774245 | 16.1639347 |
| cg24720336 | 0.03992978 | 45.7860326 | 1.19233305 | 1758.20068 |
| cg17838626 | 0.03993048 | 29.2574745 | 1.1680069  | 732.872226 |
| cg25468863 | 0.03993445 | 1206.15115 | 1.38574273 | 1049834.56 |
| cg15616946 | 0.03994403 | 1.73E-07   | 6.13E-14   | 0.4891125  |
| cg11337261 | 0.03995108 | 1.8497E+10 | 2.9597882  | 1.16E+20   |
| cg13628960 | 0.03995184 | 1.3636E+12 | 3.60527247 | 5.16E+23   |
| cg25247520 | 0.03995664 | 5.86339565 | 1.08452003 | 31.700114  |
| cg03660010 | 0.03996307 | 4.07695682 | 1.06654531 | 15.5845013 |
| cg22661556 | 0.0399659  | 6736.25365 | 1.49779422 | 30295959.6 |
| cg25019564 | 0.03997381 | 9.1366E+10 | 3.1761749  | 2.63E+21   |
| cg09047573 | 0.03997761 | 7.81199999 | 1.09866202 | 55.5469677 |
| cg02272993 | 0.03999665 | 6.7193902  | 1.09092153 | 41.3872158 |
| cg22776856 | 0.04000513 | 10.4470849 | 1.11303173 | 98.0579253 |
| cg19698570 | 0.04000861 | 1.2019E+13 | 3.95143135 | 3.66E+25   |
| cg00994629 | 0.04000942 | 4.25627307 | 1.06830764 | 16.9575316 |
| cg07318155 | 0.04001213 | 55698.0928 | 1.64605265 | 1884676976 |
| cg09551160 | 0.04001293 | 9077.98087 | 1.51529442 | 54385296.7 |
| cg00165360 | 0.04001531 | 1877.9901  | 1.41011149 | 2501112.03 |
| cg07285708 | 0.04001917 | 8.81540129 | 1.10427629 | 70.3730587 |
| cg24413235 | 0.04001939 | 412.403687 | 1.3157881  | 129258.504 |
| cg03594790 | 0.04003069 | 6.01051194 | 1.08506184 | 33.294189  |
| cg16370061 | 0.04003281 | 38912.1799 | 1.61765057 | 936022757  |

|            |            |            |            |            |
|------------|------------|------------|------------|------------|
| cg13049471 | 0.04003595 | 3.74460802 | 1.06190544 | 13.2046495 |
| cg24937675 | 0.04003892 | 7.16349525 | 1.09367888 | 46.9202295 |
| cg27246282 | 0.04003906 | 4.4290435  | 1.07002221 | 18.3327281 |
| cg00419564 | 0.04004512 | 4465.09172 | 1.46514421 | 13607564.3 |
| cg27144788 | 0.04004653 | 15255.7545 | 1.54918653 | 150232422  |
| cg17695682 | 0.04005167 | 0.06382952 | 0.00461653 | 0.88252543 |
| cg07826859 | 0.04005185 | 4.4500519  | 1.07015447 | 18.5047697 |
| cg24917627 | 0.04005363 | 4880469557 | 2.75380607 | 8.6495E+18 |
| cg08627125 | 0.04005644 | 5.25964973 | 1.07826982 | 25.6558374 |
| cg09807148 | 0.04005682 | 23.7594409 | 1.15465671 | 488.899449 |
| cg01668452 | 0.04006029 | 102.623237 | 1.23384998 | 8535.50195 |
| cg06656027 | 0.04006829 | 28.700013  | 1.16438599 | 707.403519 |
| cg07320850 | 0.04006849 | 11.1470872 | 1.11551356 | 111.390446 |
| cg03516318 | 0.04007193 | 17.5493685 | 1.13864986 | 270.478526 |
| cg19535896 | 0.04007377 | 4.19493557 | 1.06712809 | 16.4905082 |
| cg19761115 | 0.04007761 | 4.69262051 | 1.07253234 | 20.5314902 |
| cg07303577 | 0.04008173 | 0.22347975 | 0.05344886 | 0.93441091 |
| cg25611569 | 0.04008373 | 0.11660238 | 0.01498508 | 0.90731018 |
| cg15918224 | 0.04008401 | 44496967.5 | 2.21912149 | 8.9224E+14 |
| cg01451391 | 0.04009055 | 3.38321895 | 1.05667664 | 10.8322358 |
| cg07932328 | 0.04009327 | 147122.246 | 1.71266131 | 1.2638E+10 |
| cg13264662 | 0.04009964 | 31864445.7 | 2.18300517 | 4.6511E+14 |
| cg11786558 | 0.04009979 | 2636.34181 | 1.42752444 | 4868776.98 |
| cg25981124 | 0.04010689 | 1319.17903 | 1.38321544 | 1258107.21 |
| cg02593579 | 0.04010801 | 838.218014 | 1.35513155 | 518480.616 |
| cg10168009 | 0.04011038 | 4.98269862 | 1.0751788  | 23.0913087 |
| cg17702076 | 0.04011474 | 1424973369 | 2.58805716 | 7.8458E+17 |
| cg09741298 | 0.04011724 | 103.93104  | 1.23299495 | 8760.50707 |
| cg14796261 | 0.04011941 | 22.8737198 | 1.15158511 | 454.336422 |
| cg09690326 | 0.0401308  | 51.1432487 | 1.19387948 | 2190.86763 |

|            |            |            |            |            |
|------------|------------|------------|------------|------------|
| cg00953309 | 0.04013122 | 0.09784894 | 0.01063099 | 0.90061396 |
| cg20131013 | 0.04013682 | 48.6880638 | 1.1911035  | 1990.19444 |
| cg07253870 | 0.04014161 | 3791.1925  | 1.4487572  | 9921014.04 |
| cg15735240 | 0.04014187 | 198.98048  | 1.26885479 | 31203.9107 |
| cg27236007 | 0.04014665 | 14.1644421 | 1.12657556 | 178.089627 |
| cg04691829 | 0.04015002 | 8.04352529 | 1.09823714 | 58.9110463 |
| cg13359765 | 0.04015355 | 34.5460711 | 1.17251596 | 1017.83777 |
| cg20583141 | 0.04016502 | 7.37657698 | 1.09381587 | 49.7468445 |
| cg04607699 | 0.04016694 | 0.18929265 | 0.03860991 | 0.92804421 |
| cg24812891 | 0.04017078 | 196.838877 | 1.26730993 | 30573.0608 |
| cg23538718 | 0.0401722  | 6.02028698 | 1.08382161 | 33.4407942 |
| cg13582446 | 0.0401727  | 103389.613 | 1.67816896 | 6369687650 |
| cg16092895 | 0.04017426 | 36.4377224 | 1.17490853 | 1130.05189 |
| cg08769189 | 0.04018801 | 14.3187259 | 1.12653033 | 181.997685 |
| cg08527546 | 0.04019021 | 205401833  | 2.35514476 | 1.7914E+16 |
| cg04589156 | 0.04019064 | 317862077  | 2.40152426 | 4.2072E+16 |
| cg12502785 | 0.04019123 | 1056300181 | 2.53397023 | 4.4032E+17 |
| cg22755785 | 0.04019989 | 0.00373807 | 1.79E-05   | 0.77889706 |
| cg10354495 | 0.04020891 | 5.75460913 | 1.08129775 | 30.6257239 |
| cg16645539 | 0.04020923 | 214350.145 | 1.7302176  | 2.6555E+10 |
| cg26243751 | 0.0402194  | 9.65805184 | 1.10646976 | 84.3023175 |
| cg00327383 | 0.04022775 | 12.338487  | 1.11851449 | 136.107546 |
| cg09125316 | 0.04022944 | 0.18937992 | 0.03862548 | 0.92852567 |
| cg26163234 | 0.04023274 | 4.57363015 | 1.07007578 | 19.548235  |
| cg18815765 | 0.04023591 | 1224663.36 | 1.86692898 | 8.0335E+11 |
| cg15001364 | 0.0402445  | 2844.09551 | 1.42455196 | 5678191.79 |
| cg05401069 | 0.04025757 | 5.87866996 | 1.08188188 | 31.943192  |
| cg13981545 | 0.04026228 | 0.00033049 | 1.56E-07   | 0.70052132 |
| cg24562149 | 0.04026284 | 12.1013303 | 1.11707956 | 131.093791 |
| cg22545356 | 0.04026898 | 109.50779  | 1.23169523 | 9736.13909 |



|            |            |            |            |            |
|------------|------------|------------|------------|------------|
| cg22325715 | 0.04027068 | 0.08448161 | 0.0079642  | 0.8961532  |
| cg17205313 | 0.04027119 | 6.29855078 | 1.08507313 | 36.561353  |
| cg01579216 | 0.04027838 | 0.01146507 | 0.00016024 | 0.82029357 |
| cg07469744 | 0.04027915 | 29.6560382 | 1.16213212 | 756.781944 |
| cg25504222 | 0.04028276 | 5824876886 | 2.70834897 | 1.2528E+19 |
| cg02081402 | 0.04028392 | 123.139476 | 1.23769891 | 12251.2272 |
| cg22238209 | 0.04028485 | 8.00620129 | 1.09653443 | 58.4562213 |
| cg25207447 | 0.04028662 | 103.926269 | 1.2283577  | 8792.77217 |
| cg11558169 | 0.0402883  | 3714.54423 | 1.43909603 | 9587851.34 |
| cg19016652 | 0.04028951 | 5.3973373  | 1.07750579 | 27.0358176 |
| cg05740418 | 0.04029621 | 5.95499879 | 1.08214522 | 32.7701033 |
| cg14840429 | 0.04029629 | 7.45140931 | 1.0929313  | 50.8023706 |
| cg20092036 | 0.04029792 | 9.9706908  | 1.1070866  | 89.7984625 |
| cg01308931 | 0.04030839 | 1.1658E+11 | 3.08326121 | 4.41E+21   |
| cg11195360 | 0.04031051 | 0.28587434 | 0.08637247 | 0.94618275 |
| cg06327965 | 0.04031251 | 0.03350965 | 0.00130461 | 0.86071499 |
| cg10468369 | 0.04032064 | 55692.7837 | 1.61967953 | 1914999908 |
| cg00396407 | 0.04032188 | 3.1406E+11 | 3.21578994 | 3.07E+22   |
| cg07744751 | 0.0403234  | 71.5293198 | 1.20729316 | 4237.9463  |
| cg09462826 | 0.04033243 | 238.062979 | 1.27276386 | 44528.2775 |
| cg21197066 | 0.04033296 | 155976601  | 2.29652803 | 1.0594E+16 |
| cg19458266 | 0.04033761 | 100.592179 | 1.22520662 | 8258.84083 |
| cg15080939 | 0.04034558 | 20.1591317 | 1.14132665 | 356.068607 |
| cg12406391 | 0.04035105 | 3.12123073 | 1.05133813 | 9.2663635  |
| cg01909364 | 0.04035638 | 6.16069653 | 1.0832057  | 35.0387575 |
| cg13078926 | 0.04035697 | 128.442238 | 1.23791176 | 13326.8048 |
| cg00393376 | 0.04035933 | 0.00723178 | 6.49E-05   | 0.80524084 |
| cg24034106 | 0.04036101 | 1.35E-07   | 3.65E-14   | 0.49907495 |
| cg02034887 | 0.04037033 | 3.74695217 | 1.05969232 | 13.248799  |
| cg04387010 | 0.04037552 | 32.1970599 | 1.16451047 | 890.202959 |

|            |            |            |            |            |
|------------|------------|------------|------------|------------|
| cg20382695 | 0.04037996 | 7.48999976 | 1.09230103 | 51.3595566 |
| cg05774290 | 0.04039915 | 30.4490301 | 1.16121445 | 798.425678 |
| cg16043990 | 0.04040233 | 8366797374 | 2.71645056 | 2.577E+19  |
| cg00210994 | 0.04040728 | 7.91701394 | 1.09466407 | 57.2587621 |
| cg23197860 | 0.04041324 | 1.4518E+10 | 2.77933503 | 7.5835E+19 |
| cg21767036 | 0.04041485 | 0.02094543 | 0.00051941 | 0.84463041 |
| cg06720722 | 0.0404224  | 4.06133877 | 1.06307568 | 15.5158027 |
| cg02808338 | 0.04042492 | 5306857.4  | 1.9652216  | 1.4331E+13 |
| cg02211646 | 0.04043261 | 6.47843454 | 1.08486441 | 38.6869676 |
| cg08351100 | 0.04044126 | 4.11198679 | 1.0635154  | 15.8986277 |
| cg09069694 | 0.04044186 | 13.014687  | 1.11823664 | 151.472481 |
| cg11806890 | 0.04044313 | 235797674  | 2.3151234  | 2.4016E+16 |
| cg26183265 | 0.04045044 | 54.3043106 | 1.18981978 | 2478.49146 |
| cg13485746 | 0.04046407 | 205759.394 | 1.70150781 | 2.4882E+10 |
| cg25479708 | 0.04046551 | 0.01364676 | 0.00022442 | 0.82983343 |
| cg00442267 | 0.04046594 | 78.5484282 | 1.20869174 | 5104.57331 |
| cg10027270 | 0.04048455 | 1.0965E+14 | 4.06052221 | 2.96E+27   |
| cg02882624 | 0.04049    | 72368695.3 | 2.19017062 | 2.3912E+15 |
| cg22049899 | 0.0404909  | 6.29103238 | 1.08292264 | 36.5465519 |
| cg12850793 | 0.04049176 | 72071.5796 | 1.62330089 | 3199845829 |
| cg10779981 | 0.04049191 | 2820648.77 | 1.90270855 | 4.1814E+12 |
| cg01437411 | 0.04049275 | 15.6944592 | 1.12663802 | 218.62927  |
| cg01296532 | 0.0404952  | 134.425742 | 1.23638477 | 14615.418  |
| cg12778476 | 0.04049802 | 3.9670649  | 1.06145837 | 14.8263977 |
| cg01044722 | 0.04050698 | 769999.994 | 1.79691516 | 3.2995E+11 |
| cg03774463 | 0.04052686 | 5.70427486 | 1.0780175  | 30.1838807 |
| cg07612928 | 0.04053435 | 7.2383146  | 1.08907515 | 48.1079735 |
| cg06991565 | 0.04053974 | 10.18204   | 1.1051482  | 93.8099874 |
| cg13653153 | 0.04054185 | 2763.32394 | 1.40680024 | 5427891.61 |
| cg23848647 | 0.04054733 | 3149348.35 | 1.90426549 | 5.2085E+12 |

|            |            |            |            |            |
|------------|------------|------------|------------|------------|
| cg24884519 | 0.04055414 | 3.1472838  | 1.05055391 | 9.42873579 |
| cg06277849 | 0.04055615 | 16.2040684 | 1.12724808 | 232.93172  |
| cg03496709 | 0.04056983 | 8.17064079 | 1.09438911 | 61.0014941 |
| cg07357346 | 0.04057382 | 6.27898415 | 1.08204609 | 36.4361948 |
| cg23615572 | 0.04057523 | 63892.2196 | 1.60775408 | 2539079683 |
| cg26987699 | 0.04057993 | 5.32131676 | 1.07433542 | 26.3571428 |
| cg15819780 | 0.04057997 | 21.0975483 | 1.13971897 | 390.540614 |
| cg25139493 | 0.04058098 | 8.54920632 | 1.09639448 | 66.6629849 |
| cg04356968 | 0.04058838 | 895.485432 | 1.33813095 | 599264.337 |
| cg23655816 | 0.04058951 | 54608402.1 | 2.14539732 | 1.39E+15   |
| cg21721432 | 0.04060811 | 14823.0732 | 1.50777524 | 145726957  |
| cg26484631 | 0.04061823 | 14.0070981 | 1.11933239 | 175.281981 |
| cg05771157 | 0.04062113 | 0.23780988 | 0.06013005 | 0.94052037 |
| cg11511443 | 0.04062114 | 4.18210284 | 1.06299286 | 16.4535293 |
| cg10165864 | 0.04062259 | 5.85349575 | 1.07834908 | 31.7739526 |
| cg09369490 | 0.04062307 | 20314445.2 | 2.0508718  | 2.0122E+14 |
| cg21646955 | 0.04062897 | 4.08598076 | 1.06188235 | 15.7223056 |
| cg27452691 | 0.04062999 | 18.54826   | 1.13265205 | 303.745488 |
| cg08589721 | 0.04063291 | 74.073383  | 1.20148989 | 4566.71848 |
| cg16843689 | 0.04063695 | 4.4787E+13 | 3.81773063 | 5.25E+26   |
| cg23758931 | 0.0406377  | 1.2199E+12 | 3.27393391 | 4.55E+23   |
| cg15597540 | 0.04064004 | 31647.2433 | 1.55501945 | 644074262  |
| cg04912712 | 0.04064645 | 3.34905345 | 1.05280554 | 10.6535904 |
| cg09611962 | 0.04064768 | 1.4698E+10 | 2.70896493 | 7.9743E+19 |
| cg17374636 | 0.04065394 | 6202.61613 | 1.44987566 | 26534997.4 |
| cg01542384 | 0.04065577 | 0.11894537 | 0.01548889 | 0.91342873 |
| cg10687642 | 0.04066939 | 262500.762 | 1.69872501 | 4.0564E+10 |
| cg11553177 | 0.04067083 | 973140.704 | 1.79575313 | 5.2736E+11 |
| cg00023464 | 0.04067296 | 0.09290151 | 0.00954665 | 0.90405459 |
| cg06422261 | 0.04067819 | 18.392029  | 1.1314866  | 298.957789 |

|            |            |            |            |            |
|------------|------------|------------|------------|------------|
| cg06276088 | 0.04068068 | 0.17575274 | 0.03325285 | 0.92891376 |
| cg16682385 | 0.04068767 | 4855900389 | 2.57325949 | 9.1634E+18 |
| cg16923670 | 0.04069922 | 121018974  | 2.19831466 | 6.6622E+15 |
| cg10561067 | 0.04070347 | 6.38675106 | 1.081597   | 37.7132973 |
| cg02192967 | 0.04070654 | 2.94625529 | 1.04675375 | 8.29270516 |
| cg20689586 | 0.04070679 | 4286.50187 | 1.42426278 | 12900778.3 |
| cg26884261 | 0.04070936 | 4016214.14 | 1.90183925 | 8.4813E+12 |
| cg12680131 | 0.04071054 | 0.42505425 | 0.18732425 | 0.96448333 |
| cg15646359 | 0.0407126  | 731.401468 | 1.32140779 | 404831.96  |
| cg08951271 | 0.04071413 | 14.1924243 | 1.11860453 | 180.068026 |
| cg15997635 | 0.04071453 | 24640298.2 | 2.05256539 | 2.958E+14  |
| cg09495769 | 0.04071459 | 4.76319636 | 1.06817157 | 21.2400707 |
| cg02545393 | 0.04071595 | 14206556.8 | 2.00513873 | 1.0065E+14 |
| cg03851496 | 0.04072082 | 15.0429093 | 1.1212617  | 201.816507 |
| cg13397649 | 0.04072133 | 5474.90347 | 1.43822044 | 20841428.2 |
| cg20910746 | 0.04072267 | 7.35722415 | 1.08789025 | 49.7557057 |
| cg09033857 | 0.04073012 | 9.8831E+13 | 3.8926541  | 2.51E+27   |
| cg11758345 | 0.04073716 | 8.98378346 | 1.09693512 | 73.5762435 |
| cg13354988 | 0.04074316 | 17.3806038 | 1.12777823 | 267.858857 |
| cg11383961 | 0.04075097 | 26852258.4 | 2.05393079 | 3.5106E+14 |
| cg06382770 | 0.0407549  | 23.3674601 | 1.14172317 | 478.25796  |
| cg25390230 | 0.0407569  | 342875457  | 2.28501123 | 5.145E+16  |
| cg08872703 | 0.04075711 | 6.4336424  | 1.08141761 | 38.2754584 |
| cg20673255 | 0.04075879 | 1761.98805 | 1.36917762 | 2267493.9  |
| cg14711866 | 0.04076265 | 5.17917339 | 1.07155361 | 25.0326597 |
| cg15156836 | 0.04076393 | 87.1740224 | 1.20649391 | 6298.67263 |
| cg20209308 | 0.04076533 | 3.91638529 | 1.05902462 | 14.4832078 |
| cg23242944 | 0.04077015 | 22.2433218 | 1.13910176 | 434.346941 |
| cg00606312 | 0.04077276 | 49.4926262 | 1.17794422 | 2079.48731 |
| cg21171339 | 0.04077702 | 6.51679166 | 1.08180953 | 39.2569785 |

|            |            |            |            |            |
|------------|------------|------------|------------|------------|
| cg11056224 | 0.04077837 | 58.1199058 | 1.18578683 | 2848.67682 |
| cg10981962 | 0.0407805  | 0.09226761 | 0.00940806 | 0.9048952  |
| cg19895185 | 0.04078397 | 96.201235  | 1.21097177 | 7642.35619 |
| cg16332577 | 0.04078537 | 174.522438 | 1.24154479 | 24532.4064 |
| cg00212119 | 0.04078716 | 0.28846054 | 0.08765921 | 0.94923833 |
| cg23526676 | 0.04079316 | 11.8993475 | 1.10927292 | 127.646198 |
| cg19184415 | 0.0407963  | 20.7932922 | 1.13545359 | 380.78263  |
| cg17910586 | 0.04079791 | 20.6195267 | 1.13502855 | 374.585188 |
| cg13586425 | 0.04079981 | 11.8059096 | 1.10882016 | 125.700727 |
| cg12104984 | 0.04080167 | 289633080  | 2.25945791 | 3.7127E+16 |
| cg06240896 | 0.04080275 | 3057.26327 | 1.39891761 | 6681493.35 |
| cg18095732 | 0.04080322 | 8523.22382 | 1.46018909 | 49750641.8 |
| cg23103688 | 0.0408074  | 7.61842725 | 1.0886019  | 53.3164916 |
| cg12978308 | 0.04080981 | 16.5794953 | 1.12453749 | 244.437973 |
| cg06000635 | 0.04081292 | 23.9188602 | 1.14184265 | 501.042655 |
| cg25404454 | 0.04082383 | 207.044236 | 1.24924938 | 34314.4581 |
| cg04974751 | 0.040824   | 379651.679 | 1.70931815 | 8.4323E+10 |
| cg15692031 | 0.04082705 | 3.7922E+10 | 2.76244875 | 5.21E+20   |
| cg21887246 | 0.0408348  | 931226.082 | 1.77327856 | 4.8903E+11 |
| cg16191009 | 0.04083694 | 16.4238475 | 1.12368841 | 240.051215 |
| cg14671364 | 0.04083971 | 25.2026131 | 1.14386934 | 555.283446 |
| cg16681199 | 0.04084177 | 10.2822475 | 1.10191489 | 95.9462615 |
| cg21444002 | 0.04084366 | 0.00976295 | 0.00011558 | 0.82469802 |
| cg07911225 | 0.04084708 | 17.6225048 | 1.12683565 | 275.597132 |
| cg14283602 | 0.04085358 | 8466464.86 | 1.94138985 | 3.6923E+13 |
| cg16532893 | 0.04086292 | 5766115.29 | 1.90930181 | 1.7414E+13 |
| cg13455960 | 0.04086419 | 8.87035671 | 1.09490294 | 71.8631992 |
| cg09137453 | 0.0408671  | 20.5076554 | 1.13364289 | 370.984492 |
| cg01676959 | 0.04087036 | 799.703644 | 1.31976578 | 484575.313 |
| cg07419459 | 0.04087809 | 270448421  | 2.23714995 | 3.2694E+16 |

|            |            |            |            |            |
|------------|------------|------------|------------|------------|
| cg27045356 | 0.04087954 | 3118585.54 | 1.85897117 | 5.2317E+12 |
| cg11042320 | 0.04088455 | 9.593803   | 1.09823421 | 83.8082212 |
| cg00566982 | 0.04088543 | 7.35229304 | 1.08618063 | 49.7672405 |
| cg24699146 | 0.0408977  | 4.50923556 | 1.06430475 | 19.1046835 |
| cg04656757 | 0.04089804 | 1.56E-06   | 4.23E-12   | 0.57507156 |
| cg24093411 | 0.04089855 | 8.71362761 | 1.09370573 | 69.4220613 |
| cg27636594 | 0.0409023  | 21.3493907 | 1.13495682 | 401.598085 |
| cg19929126 | 0.04090565 | 4.47990112 | 1.06395705 | 18.8630867 |
| cg09424275 | 0.04090997 | 46232.1773 | 1.55868321 | 1371294823 |
| cg26284300 | 0.04091507 | 0.00396742 | 1.98E-05   | 0.79584282 |
| cg03465028 | 0.04091612 | 2.98083539 | 1.04613086 | 8.49356421 |
| cg14183922 | 0.04092682 | 6.2326585  | 1.07838215 | 36.0225102 |
| cg18540492 | 0.04093216 | 11.4943379 | 1.10587979 | 119.470312 |
| cg01268571 | 0.04094029 | 4.68286884 | 1.06563704 | 20.5785457 |
| cg17255450 | 0.04094307 | 4.2223023  | 1.0610837  | 16.8015366 |
| cg04626931 | 0.04094313 | 7.17421396 | 1.08449172 | 47.4594181 |
| cg07758574 | 0.04094406 | 5.7038101  | 1.0742928  | 30.2835965 |
| cg27277974 | 0.04094702 | 1789.51672 | 1.36091885 | 2353094.09 |
| cg03054576 | 0.04095085 | 3690214.67 | 1.86242479 | 7.3118E+12 |
| cg12649539 | 0.04095351 | 336.561644 | 1.27027252 | 89172.787  |
| cg22476252 | 0.04095395 | 7.01844956 | 1.08340377 | 45.4665524 |
| cg02112027 | 0.04095544 | 20.3871832 | 1.13193248 | 367.192605 |
| cg00251405 | 0.04095993 | 9.31633718 | 1.09602303 | 79.1900685 |
| cg18509435 | 0.04096639 | 0.26530815 | 0.07432889 | 0.94698587 |
| cg14601444 | 0.04097634 | 7.98270593 | 1.0889124  | 58.5204044 |
| cg05043716 | 0.04099053 | 0.0897868  | 0.00889771 | 0.90603862 |
| cg00358323 | 0.0409938  | 3233.47684 | 1.39195138 | 7511305.78 |
| cg16385583 | 0.04099664 | 0.11442661 | 0.01430766 | 0.91513539 |
| cg26757722 | 0.04099678 | 0.19054991 | 0.03885716 | 0.93442921 |
| cg20813773 | 0.04100079 | 7662.72362 | 1.44154929 | 40732102.3 |

|             |            |            |            |            |
|-------------|------------|------------|------------|------------|
| cg00240569  | 0.04100102 | 76381.2579 | 1.58363871 | 3683982029 |
| cg08293536  | 0.04100556 | 867.880089 | 1.31851429 | 571261.043 |
| cg18324542  | 0.04101627 | 202181.451 | 1.64648556 | 2.4827E+10 |
| cg27264388  | 0.04101792 | 0.02053599 | 0.00049419 | 0.85336986 |
| cg23684878  | 0.04102279 | 3.14751502 | 1.0478751  | 9.45422869 |
| cg20609803  | 0.04102861 | 0.01784047 | 0.00037504 | 0.84865695 |
| cg27287305  | 0.04104544 | 6.45682114 | 1.07882107 | 38.6445357 |
| cg01919895  | 0.04104573 | 27.5211648 | 1.14435255 | 661.871651 |
| cg08132837  | 0.04104929 | 7.18064928 | 1.08345492 | 47.5900964 |
| cg26771969  | 0.04105502 | 53.4964294 | 1.17550669 | 2434.58244 |
| cg14240820  | 0.04106521 | 0.18198603 | 0.03549003 | 0.93318918 |
| cg22940268  | 0.04107774 | 31.1407974 | 1.14951841 | 843.613512 |
| cg17695512  | 0.04108284 | 0.22245484 | 0.05259208 | 0.94094301 |
| cg21276549  | 0.0410857  | 0.03696917 | 0.00156193 | 0.87501804 |
| cg111178810 | 0.04108672 | 3308527897 | 2.42867753 | 4.5071E+18 |
| cg14190534  | 0.04108766 | 5.17826197 | 1.06882872 | 25.0876465 |
| cg23094080  | 0.04109183 | 7467.08974 | 1.43448959 | 38869176.6 |
| cg12384236  | 0.04109279 | 7.02604182 | 1.08206117 | 45.6215094 |
| cg04302492  | 0.04110018 | 10935.633  | 1.4562666  | 82119626.1 |
| cg07950803  | 0.04110031 | 0.24923424 | 0.06570566 | 0.9453935  |
| cg20822606  | 0.0411061  | 66359628.1 | 2.06978051 | 2.1276E+15 |
| cg19872537  | 0.04110909 | 44359.343  | 1.5403678  | 1277455497 |
| cg01373705  | 0.04111022 | 46257.0814 | 1.54288649 | 1386827606 |
| cg06074332  | 0.04112188 | 3978274.61 | 1.84529578 | 8.5768E+12 |
| cg21111471  | 0.04112836 | 5.45488831 | 1.07073208 | 27.7901512 |
| cg07650391  | 0.04112982 | 4.76030711 | 1.06486183 | 21.2802481 |
| cg11586189  | 0.04113193 | 7.67859897 | 1.08554508 | 54.3145403 |
| cg04522003  | 0.041135   | 10.1757857 | 1.09788617 | 94.3145268 |
| cg26522057  | 0.04114334 | 2675815.62 | 1.81329422 | 3.9486E+12 |
| cg20495404  | 0.04114881 | 10.1464383 | 1.09759211 | 93.7964195 |

|            |            |            |            |            |
|------------|------------|------------|------------|------------|
| cg09113530 | 0.04115006 | 17.6238438 | 1.12219926 | 276.777824 |
| cg16564710 | 0.04115083 | 508.02606  | 1.28444683 | 200935.119 |
| cg17805404 | 0.04115129 | 68.6183263 | 1.18516786 | 3972.83361 |
| cg16175263 | 0.04115945 | 9.89865271 | 1.0963753  | 89.3702417 |
| cg03784679 | 0.04116333 | 33869181.7 | 2.00485917 | 5.7217E+14 |
| cg18117600 | 0.04116861 | 3.65601511 | 1.05335054 | 12.6894571 |
| cg26934993 | 0.04117162 | 3.87694695 | 1.05581099 | 14.2361823 |
| cg02630854 | 0.04117216 | 23.040687  | 1.13397678 | 468.151787 |
| cg15604693 | 0.04117311 | 514.509041 | 1.28425503 | 206126.936 |
| cg08244301 | 0.04117684 | 6.39066274 | 1.07712396 | 37.9163138 |
| cg14386850 | 0.04118655 | 73261.9881 | 1.56543947 | 3428633947 |
| cg10465680 | 0.04118778 | 1166.44202 | 1.32642465 | 1025755.2  |
| cg16421340 | 0.04118922 | 10.6493354 | 1.09923003 | 103.170712 |
| cg11785652 | 0.04119149 | 2.92195808 | 1.04380647 | 8.17952295 |
| cg25104555 | 0.04119323 | 2.84910784 | 1.04274425 | 7.78466584 |
| cg02017200 | 0.04119551 | 53354.6203 | 1.5449915  | 1842544445 |
| cg13850354 | 0.04119799 | 1.08E-06   | 2.02E-12   | 0.5776092  |
| cg23047335 | 0.04120568 | 124.467275 | 1.21235579 | 12778.5117 |
| cg16719517 | 0.04120854 | 9.29054524 | 1.09302226 | 78.9684109 |
| cg01342926 | 0.04120871 | 42854.3834 | 1.53049757 | 1199935374 |
| cg14871584 | 0.04120906 | 59.44499   | 1.17703781 | 3002.20334 |
| cg16760485 | 0.04121327 | 12.4142245 | 1.10567525 | 139.383576 |
| cg08582356 | 0.04121767 | 4.74097116 | 1.06399794 | 21.12486   |
| cg00821310 | 0.04122608 | 0.03410454 | 0.00133061 | 0.87412743 |
| cg21037008 | 0.04123057 | 3.9235834  | 1.05591402 | 14.5793184 |
| cg01409659 | 0.04124219 | 1165.17024 | 1.32395573 | 1025428.32 |
| cg06836497 | 0.04124382 | 7.7814E+10 | 2.70882291 | 2.24E+21   |
| cg27102995 | 0.04125444 | 78.2952988 | 1.18893099 | 5156.02158 |
| cg01116067 | 0.04125613 | 9.86476677 | 1.09507618 | 88.8647064 |
| cg21167563 | 0.04125772 | 32.3897937 | 1.14794231 | 913.895004 |



|            |            |            |            |            |
|------------|------------|------------|------------|------------|
| cg10775792 | 0.04126511 | 9.32253078 | 1.0925187  | 79.5497417 |
| cg03057164 | 0.04127395 | 94353826.1 | 2.06898574 | 4.3029E+15 |
| cg17703407 | 0.04127917 | 21434.1406 | 1.48382144 | 309621072  |
| cg24921634 | 0.0412863  | 85347.4801 | 1.56660842 | 4649657356 |
| cg13338877 | 0.04129397 | 14.0469202 | 1.11001627 | 177.759527 |
| cg21561492 | 0.04129627 | 5.34568655 | 1.06843512 | 26.745999  |
| cg23230554 | 0.04131165 | 0.12800703 | 0.01776876 | 0.92216895 |
| cg03344031 | 0.04132688 | 4.12689027 | 1.05735593 | 16.1073701 |
| cg19930885 | 0.04133114 | 244.834937 | 1.24148132 | 48284.3724 |
| cg04946916 | 0.04133259 | 23197.3471 | 1.48469375 | 362443037  |
| cg12237591 | 0.04133418 | 1385392.59 | 1.74350534 | 1.1008E+12 |
| cg20777128 | 0.0413405  | 14.5630874 | 1.1109445  | 190.90379  |
| cg01298678 | 0.04134165 | 5.97945664 | 1.07276077 | 33.3288677 |
| cg10248148 | 0.04134616 | 4118.24794 | 1.38639965 | 12233100.4 |
| cg05855489 | 0.04135326 | 81.558949  | 1.18841176 | 5597.27056 |
| cg09313482 | 0.04135753 | 5.36840467 | 1.06809385 | 26.9824311 |
| cg08996521 | 0.04136053 | 604.72716  | 1.28527395 | 284526.841 |
| cg26541027 | 0.04136536 | 28244.852  | 1.49385643 | 534035033  |
| cg10339200 | 0.04136539 | 46630.0611 | 1.52347344 | 1427240242 |
| cg13052543 | 0.04136982 | 589.446491 | 1.28362591 | 270676.343 |
| cg01022087 | 0.04137329 | 0.07429039 | 0.00610998 | 0.90328646 |
| cg18398007 | 0.04137721 | 1.8591E+11 | 2.75867031 | 1.25E+22   |
| cg06289138 | 0.04138067 | 4.73375029 | 1.06265842 | 21.0871071 |
| cg00518698 | 0.04138249 | 83857598.6 | 2.0401502  | 3.4469E+15 |
| cg19166626 | 0.0413848  | 394981.169 | 1.65447553 | 9.4296E+10 |
| cg11943056 | 0.04139324 | 5.211086   | 1.06655202 | 25.4609402 |
| cg11025037 | 0.04139409 | 0.19098243 | 0.03890873 | 0.93743189 |
| cg05409131 | 0.0414005  | 149.63796  | 1.21567719 | 18418.9678 |
| cg02442619 | 0.04140369 | 10.1949366 | 1.09473221 | 94.9426085 |
| cg09015232 | 0.04140662 | 0.19510342 | 0.04056824 | 0.93830401 |

|            |            |            |            |            |
|------------|------------|------------|------------|------------|
| cg22234827 | 0.04141149 | 726228.417 | 1.69143346 | 3.1181E+11 |
| cg17489534 | 0.04141662 | 23040.4801 | 1.47838646 | 359083188  |
| cg10642449 | 0.04142039 | 17090.461  | 1.46104405 | 199914478  |
| cg25318809 | 0.04142085 | 3.88904393 | 1.0542531  | 14.3463298 |
| cg24496666 | 0.04142258 | 5.86575212 | 1.07122698 | 32.1192881 |
| cg07485417 | 0.0414306  | 10.0865012 | 1.09395448 | 92.9997616 |
| cg15134506 | 0.04143344 | 6.24678804 | 1.07375135 | 36.342083  |
| cg15034464 | 0.04143411 | 8.1732E+11 | 2.90165444 | 2.30E+23   |
| cg10905319 | 0.04143563 | 1.7741E+12 | 2.98971234 | 1.05E+24   |
| cg14980255 | 0.04145134 | 15.4285097 | 1.11187149 | 214.08851  |
| cg27284088 | 0.04145242 | 185.139382 | 1.22424249 | 27998.204  |
| cg07264792 | 0.0414582  | 161310.588 | 1.59095993 | 1.6356E+10 |
| cg18770763 | 0.04146301 | 28.6688231 | 1.13868341 | 721.799763 |
| cg07836663 | 0.04146321 | 5.14038502 | 1.06540674 | 24.8013807 |
| cg09961689 | 0.04146979 | 12.6285852 | 1.10303192 | 144.584361 |
| cg04244056 | 0.04148517 | 187047.64  | 1.59763359 | 2.1899E+10 |
| cg22752895 | 0.04148848 | 25264197.8 | 1.93015763 | 3.3069E+14 |
| cg21058987 | 0.04148905 | 4271.02816 | 1.38056943 | 13213157.6 |
| cg11213987 | 0.04149453 | 294578.64  | 1.62498192 | 5.3402E+10 |
| cg00980538 | 0.04151869 | 5440920.94 | 1.81511961 | 1.6309E+13 |
| cg06799321 | 0.04152462 | 19.1665498 | 1.12011457 | 327.963443 |
| cg17391620 | 0.04152581 | 8.88277495 | 1.08749773 | 72.5552692 |
| cg12411312 | 0.04152637 | 794.950217 | 1.29234331 | 488992.239 |
| cg16581360 | 0.04152665 | 109883.442 | 1.56161352 | 7731984004 |
| cg24927124 | 0.04152674 | 3836944299 | 2.33358869 | 6.3088E+18 |
| cg11800672 | 0.04152963 | 4.37076293 | 1.05825087 | 18.0520225 |
| cg14844619 | 0.04154048 | 839098.486 | 1.68690195 | 4.1738E+11 |
| cg25882830 | 0.04154077 | 8.5253705  | 1.08561973 | 66.9497251 |
| cg07185041 | 0.04154319 | 5.94142753 | 1.07067406 | 32.9704085 |
| cg23730696 | 0.04154983 | 8.76716586 | 1.08668333 | 70.7319189 |

|             |            |            |            |            |
|-------------|------------|------------|------------|------------|
| cg12849291  | 0.04155324 | 806295.015 | 1.6829471  | 3.8629E+11 |
| cg13968099  | 0.04155872 | 170.956061 | 1.21732267 | 24008.4042 |
| cg24494412  | 0.0415619  | 1094721.15 | 1.70179402 | 7.0421E+11 |
| cg27061971  | 0.04156323 | 0.05004708 | 0.00280852 | 0.89182606 |
| cg20612286  | 0.0415661  | 6.70326431 | 1.07541446 | 41.7827305 |
| cg27370696  | 0.04156843 | 27.3586782 | 1.13475385 | 659.612011 |
| cg16745967  | 0.04157425 | 2350.58509 | 1.34492256 | 4108229.31 |
| cg04271677  | 0.04157432 | 0.00040546 | 2.22E-07   | 0.74217624 |
| cg08101375  | 0.04157858 | 4.14942882 | 1.05579487 | 16.3078644 |
| cg09807565  | 0.04159316 | 47.6092141 | 1.15850379 | 1956.52124 |
| cg01875529  | 0.0415941  | 26248.6899 | 1.47329242 | 467655785  |
| cg18246056  | 0.0415947  | 6.87862309 | 1.07619628 | 43.965452  |
| cg12659494  | 0.04159852 | 6.42398418 | 1.07336164 | 38.4470354 |
| cg111127732 | 0.04161424 | 4.90613035 | 1.06228053 | 22.6589063 |
| cg10770023  | 0.04161608 | 6.9381614  | 1.07633925 | 44.7238952 |
| cg16781647  | 0.04161731 | 2.96704508 | 1.04216241 | 8.44720213 |
| cg24058132  | 0.04161785 | 39.7341843 | 1.15005989 | 1372.80277 |
| cg15694117  | 0.04162506 | 0.19917715 | 0.04217578 | 0.94062355 |
| cg06084073  | 0.04163824 | 13.0272835 | 1.10210748 | 153.9869   |
| cg20559657  | 0.04164945 | 8.54793353 | 1.08453619 | 67.3718116 |
| cg14452896  | 0.04165304 | 1275791662 | 2.20920964 | 7.3675E+17 |
| cg26515676  | 0.04165751 | 95125.7616 | 1.54204101 | 5868138680 |
| cg12754671  | 0.04166288 | 1776.48597 | 1.32646697 | 2379179.03 |
| cg03853987  | 0.04166293 | 4.38454326 | 1.05739567 | 18.1807248 |
| cg15717808  | 0.04166353 | 25.4428553 | 1.12996988 | 572.88154  |
| cg16148454  | 0.04169101 | 3.71770773 | 1.05064688 | 13.1550866 |
| cg07944724  | 0.04169213 | 75.3307324 | 1.17655371 | 4823.17057 |
| cg08024097  | 0.04169906 | 26694.5854 | 1.46682306 | 485812440  |
| cg06683487  | 0.0416994  | 0.12965183 | 0.01815115 | 0.92608975 |
| cg22601577  | 0.04170041 | 443257.441 | 1.63007333 | 1.2053E+11 |

|            |            |            |            |            |
|------------|------------|------------|------------|------------|
| cg07077277 | 0.04170339 | 2.5217034  | 1.03535771 | 6.14182709 |
| cg00770008 | 0.04171131 | 1739666.78 | 1.71475713 | 1.7649E+12 |
| cg14390179 | 0.04171554 | 780.865813 | 1.28380721 | 474955.597 |
| cg00920938 | 0.04171588 | 0.12164108 | 0.01601318 | 0.92402362 |
| cg26002632 | 0.04171663 | 11.5918048 | 1.09625239 | 122.572082 |
| cg00789347 | 0.04171881 | 29.7056873 | 1.13559414 | 777.062705 |
| cg13327503 | 0.04172002 | 13.2257047 | 1.10164195 | 158.780504 |
| cg02216481 | 0.0417208  | 9.77121166 | 1.08920134 | 87.6574181 |
| cg24058604 | 0.04172635 | 3.42926681 | 1.04724433 | 11.2293479 |
| cg21302562 | 0.0417276  | 3948072.06 | 1.76625737 | 8.825E+12  |
| cg16362201 | 0.04175721 | 0.02305557 | 0.00061185 | 0.86877914 |
| cg06213964 | 0.04175941 | 5.41405731 | 1.06503216 | 27.5221892 |
| cg00990763 | 0.04176131 | 1783.13998 | 1.3220575  | 2405030.17 |
| cg26954499 | 0.04176298 | 436465218  | 2.09967534 | 9.0729E+16 |
| cg10285525 | 0.04176461 | 15.7951149 | 1.10835617 | 225.095201 |
| cg05218653 | 0.04177057 | 0.17657221 | 0.03325809 | 0.93744847 |
| cg14377982 | 0.04177393 | 7519886.88 | 1.80316009 | 3.1361E+13 |
| cg24044028 | 0.04177832 | 7.51888092 | 1.07796654 | 52.4446431 |
| cg10630880 | 0.04177833 | 289.297188 | 1.23480028 | 67778.4615 |
| cg27339505 | 0.04180226 | 5.2957E+10 | 2.49961587 | 1.12E+21   |
| cg01708273 | 0.04182324 | 5.03788168 | 1.06165912 | 23.9062155 |
| cg10552592 | 0.04182352 | 22321.3157 | 1.44846764 | 343978090  |
| cg09927483 | 0.04182367 | 2910.61866 | 1.34329056 | 6306677.94 |
| cg02186542 | 0.04182887 | 6.79577508 | 1.07342841 | 43.0234177 |
| cg07089892 | 0.0418445  | 8.04576277 | 1.07998544 | 59.9399736 |
| cg04510815 | 0.04184761 | 11.078836  | 1.09277154 | 112.320465 |
| cg16439198 | 0.04185068 | 5.67318295 | 1.06609603 | 30.1895926 |
| cg14976964 | 0.04186021 | 696.263679 | 1.27261197 | 380935.528 |
| cg17188367 | 0.04186063 | 90.9112953 | 1.18067332 | 7000.12737 |
| cg04570419 | 0.04186907 | 1589.96006 | 1.3115049  | 1927536.07 |

|            |            |            |            |            |
|------------|------------|------------|------------|------------|
| cg03687765 | 0.04187371 | 64.046987  | 1.1652431  | 3520.30967 |
| cg23337289 | 0.04187476 | 14.9768146 | 1.10460973 | 203.062646 |
| cg24718465 | 0.04187619 | 10.482822  | 1.0902003  | 100.797585 |
| cg03011535 | 0.04188106 | 3.28401419 | 1.04464315 | 10.3238596 |
| cg12043747 | 0.0418822  | 1510.89348 | 1.30845441 | 1744653.16 |
| cg26443922 | 0.04188516 | 4100.16839 | 1.3571611  | 12387166.8 |
| cg05227350 | 0.04188709 | 10.2148114 | 1.08903336 | 95.8119151 |
| cg18672998 | 0.04189033 | 0.06810994 | 0.0051195  | 0.90613678 |
| cg16644457 | 0.04190477 | 6.90723684 | 1.07333364 | 44.450224  |
| cg10273340 | 0.0419156  | 3.22632289 | 1.04376474 | 9.97270648 |
| cg03671276 | 0.0419165  | 30.3199431 | 1.132865   | 811.481469 |
| cg03203223 | 0.04191963 | 4.16436237 | 1.05352335 | 16.4608729 |
| cg22040403 | 0.04192002 | 523.320186 | 1.25708447 | 217856.495 |
| cg02264779 | 0.04193079 | 15.2536838 | 1.10456071 | 210.649236 |
| cg01087645 | 0.04193391 | 5.5733E+10 | 2.46628515 | 1.26E+21   |
| cg11201571 | 0.04193835 | 23.5526849 | 1.12208722 | 494.372412 |
| cg21919602 | 0.04193883 | 100667944  | 1.95784881 | 5.1761E+15 |
| cg13990746 | 0.04194481 | 3.62834883 | 1.0480713  | 12.5610874 |
| cg18649459 | 0.04194535 | 17.7836098 | 1.11054569 | 284.776015 |
| cg27249554 | 0.04195887 | 9.23281718 | 1.08418758 | 78.6256131 |
| cg23912429 | 0.04196722 | 14.6110669 | 1.10232084 | 193.667096 |
| cg21107197 | 0.04197504 | 10.3481205 | 1.08849988 | 98.3772256 |
| cg07357021 | 0.04197754 | 0.12621757 | 0.0171731  | 0.92766466 |
| cg23250439 | 0.04198624 | 4003.65124 | 1.35064202 | 11867854.6 |
| cg25705508 | 0.04198971 | 0.20587443 | 0.04488139 | 0.94436214 |
| cg03605784 | 0.04199606 | 1.1099E+12 | 2.72848821 | 4.51E+23   |
| cg14377152 | 0.04199965 | 5.16114136 | 1.06116394 | 25.1020405 |
| cg14252395 | 0.04200336 | 68.9961871 | 1.16542586 | 4084.7505  |
| cg13658921 | 0.04200912 | 206363611  | 1.99709839 | 2.1324E+16 |
| cg13245912 | 0.04202375 | 174.558606 | 1.20460623 | 25295.1595 |

|            |            |            |            |            |
|------------|------------|------------|------------|------------|
| cg04724058 | 0.04202816 | 674343.964 | 1.62207384 | 2.8034E+11 |
| cg13179508 | 0.04203352 | 2775396.81 | 1.70628937 | 4.5144E+12 |
| cg06080729 | 0.04203462 | 0.13842235 | 0.02057486 | 0.93126963 |
| cg26070636 | 0.04203472 | 113165.515 | 1.52047131 | 8422673741 |
| cg27563174 | 0.04205176 | 117959.616 | 1.52132313 | 9146295531 |
| cg23609650 | 0.04205568 | 76.9506491 | 1.16878515 | 5066.28819 |
| cg02004672 | 0.04206065 | 86.1573716 | 1.17341606 | 6326.05343 |
| cg20387815 | 0.04206076 | 3.56002786 | 1.04662179 | 12.1092437 |
| cg06090660 | 0.0420628  | 4.0992405  | 1.05191819 | 15.9744102 |
| cg16236672 | 0.04206919 | 10.7381149 | 1.08881895 | 105.901088 |
| cg09059767 | 0.04207081 | 5.0350355  | 1.0596425  | 23.9246562 |
| cg19839026 | 0.04207365 | 13.5867275 | 1.09798161 | 168.125916 |
| cg26740494 | 0.04207456 | 6.70015318 | 1.07051281 | 41.9350913 |
| cg21307628 | 0.04207815 | 11.382763  | 1.09098531 | 118.761722 |
| cg25257905 | 0.0420823  | 0.274048   | 0.07866308 | 0.9547339  |
| cg12809031 | 0.0420864  | 8.24575223 | 1.07837575 | 63.0507778 |
| cg05993265 | 0.04209055 | 13.5740556 | 1.0977179  | 167.852764 |
| cg03100639 | 0.04209548 | 6.74050732 | 1.07054255 | 42.440573  |
| cg18540455 | 0.04209664 | 5.9147E+10 | 2.4252362  | 1.44E+21   |
| cg25250998 | 0.04209685 | 86.164145  | 1.17253139 | 6331.82184 |
| cg01729401 | 0.04209773 | 345.079694 | 1.23207451 | 96649.995  |
| cg21370778 | 0.0420988  | 812757.94  | 1.62567401 | 4.0634E+11 |
| cg00907427 | 0.04210052 | 0.30143947 | 0.09484028 | 0.95809249 |
| cg00411072 | 0.04210223 | 7.55295304 | 1.07483487 | 53.0752224 |
| cg12789279 | 0.04210284 | 8.66055309 | 1.08009061 | 69.4434145 |
| cg02434836 | 0.04210372 | 0.14579266 | 0.0227674  | 0.93359368 |
| cg18729488 | 0.04210492 | 283188.107 | 1.56504385 | 5.1242E+10 |
| cg05341097 | 0.0421052  | 54.5185399 | 1.15333787 | 2577.10361 |
| cg08728761 | 0.04210536 | 773059.06  | 1.62209205 | 3.6843E+11 |
| cg01353524 | 0.04211594 | 4753.97396 | 1.35208792 | 16715087.8 |

|              |            |            |            |            |
|--------------|------------|------------|------------|------------|
| cg05943971   | 0.04211816 | 1752174961 | 2.13418009 | 1.4385E+18 |
| cg08250787   | 0.0421188  | 0.09901541 | 0.01064567 | 0.92094293 |
| cg11526413   | 0.04212486 | 3.12673897 | 1.04140164 | 9.38782529 |
| cg26310240   | 0.04212977 | 22825545.9 | 1.82678006 | 2.852E+14  |
| cg18146964   | 0.04213138 | 21488.9476 | 1.42571625 | 323889743  |
| cg19309549   | 0.04213342 | 98971379.1 | 1.92400396 | 5.0911E+15 |
| cg05027458   | 0.0421414  | 4.43703314 | 1.05433141 | 18.6727466 |
| cg05783384   | 0.04214797 | 11.231934  | 1.0896009  | 115.782155 |
| cg07891064   | 0.04214844 | 3.83672107 | 1.04885665 | 14.0347383 |
| cg27600205   | 0.042154   | 3.16356457 | 1.04167169 | 9.60776887 |
| cg25814383   | 0.04215646 | 39.4598203 | 1.13910564 | 1366.92977 |
| cg01012308   | 0.04216085 | 6.4027E+15 | 3.6292336  | 1.13E+31   |
| cg15835620   | 0.0421658  | 4.30808963 | 1.05305195 | 17.624616  |
| cg27505984   | 0.04216946 | 2.8062E+11 | 2.54095452 | 3.10E+22   |
| cg19651155   | 0.04217124 | 1125864905 | 2.08995033 | 6.0651E+17 |
| cg23601586   | 0.0421797  | 208.926503 | 1.20770914 | 36143.0433 |
| cg09939831   | 0.04218439 | 76665.0424 | 1.48750719 | 3951260720 |
| cg16116203   | 0.04218454 | 9.16389671 | 1.08135229 | 77.6592451 |
| cg18080370   | 0.04218702 | 5.6544218  | 1.06305335 | 30.0760878 |
| cg09462575   | 0.04219202 | 18.6418423 | 1.10869315 | 313.448571 |
| cg12654349   | 0.04219337 | 114668.143 | 1.50806227 | 8718992057 |
| cg02151625   | 0.04219364 | 5.57132663 | 1.06244147 | 29.2154263 |
| cg01486387   | 0.04219671 | 5855.51358 | 1.35769649 | 25253832.1 |
| cg00585901   | 0.04220114 | 5.03385511 | 1.05858735 | 23.9372758 |
| cg22624697   | 0.04220311 | 20.5601721 | 1.11235515 | 380.023121 |
| cg23398241   | 0.04221052 | 34.640328  | 1.13284118 | 1059.24144 |
| cg06390079   | 0.04221255 | 3.53433114 | 1.04540978 | 11.9488997 |
| cg08726338   | 0.04221274 | 8.3562229  | 1.0775331  | 64.8021497 |
| cg01269469   | 0.04221744 | 223.389245 | 1.20941071 | 41262.0417 |
| ch.12.262555 | 0.0422186  | 0.00012508 | 2.15E-08   | 0.72917327 |

|            |            |            |            |            |
|------------|------------|------------|------------|------------|
| cg20704635 | 0.0422201  | 195.24582  | 1.20362047 | 31671.8857 |
| cg26464934 | 0.04222621 | 12.2803167 | 1.09205098 | 138.094449 |
| cg27434351 | 0.04222661 | 2992054641 | 2.15124735 | 4.1615E+18 |
| cg02377073 | 0.04222719 | 137777.432 | 1.51501396 | 1.253E+10  |
| cg26298967 | 0.04223967 | 6.62362641 | 1.06850726 | 41.0595494 |
| cg05565809 | 0.04224715 | 5.74335144 | 1.06311534 | 31.0277583 |
| cg14099293 | 0.04225667 | 102234584  | 1.90581066 | 5.4842E+15 |
| cg02015348 | 0.04227056 | 28.6114343 | 1.1241845  | 728.184894 |
| cg03810376 | 0.04227148 | 7.55777421 | 1.07313608 | 53.2271276 |
| cg12740148 | 0.04227729 | 1088301.98 | 1.62371666 | 7.2944E+11 |
| cg20532887 | 0.04227921 | 2297.53224 | 1.30973017 | 4030337.32 |
| cg00479347 | 0.04228006 | 270.117628 | 1.21551497 | 60026.8487 |
| cg23181776 | 0.04228226 | 21017.6142 | 1.41460208 | 312271637  |
| cg10514594 | 0.04229077 | 260760.855 | 1.54358421 | 4.4051E+10 |
| cg17135941 | 0.04229368 | 0.00091794 | 1.07E-06   | 0.78401064 |
| cg16184495 | 0.04229418 | 5.30887712 | 1.0598016  | 26.5938231 |
| cg23685529 | 0.04229608 | 2.9337E+13 | 2.94065531 | 2.93E+26   |
| cg20425447 | 0.04230128 | 291356876  | 1.96886612 | 4.3116E+16 |
| cg08180459 | 0.04231079 | 8.18E-06   | 1.00E-10   | 0.66587191 |
| cg25141818 | 0.04231113 | 0.02912001 | 0.00095873 | 0.8844788  |
| cg20949959 | 0.04231326 | 5401992.79 | 1.71253828 | 1.704E+13  |
| cg21878918 | 0.04231466 | 109.823853 | 1.17707734 | 10246.8022 |
| cg09386954 | 0.0423169  | 1427652.61 | 1.63485475 | 1.2467E+12 |
| cg27109748 | 0.04231881 | 0.25213156 | 0.06668133 | 0.95334522 |
| cg07834574 | 0.04232007 | 5.97197411 | 1.06391988 | 33.5217675 |
| cg21961890 | 0.04232071 | 1307331.42 | 1.62946118 | 1.0489E+12 |
| cg27660248 | 0.04232716 | 4303.87854 | 1.33619428 | 13862782.4 |
| cg18773129 | 0.04233534 | 130.604532 | 1.183618   | 14411.3589 |
| cg05496363 | 0.04234049 | 4.58711786 | 1.05407896 | 19.9621196 |
| cg19878987 | 0.04234539 | 19.8439199 | 1.10875737 | 355.155391 |



|            |            |            |            |            |
|------------|------------|------------|------------|------------|
| cg02847589 | 0.0423516  | 2484243.52 | 1.66259064 | 3.712E+12  |
| cg04271218 | 0.04235168 | 8.5724598  | 1.07699528 | 68.2334158 |
| cg22448889 | 0.04235278 | 3.64230462 | 1.04562903 | 12.6874662 |
| cg18000216 | 0.04235887 | 0.08092328 | 0.00714179 | 0.91693782 |
| cg06904356 | 0.04236381 | 0.20492801 | 0.04435365 | 0.94683283 |
| cg26188072 | 0.04236745 | 507760.368 | 1.57237701 | 1.6397E+11 |
| cg20613442 | 0.04237301 | 85.2728859 | 1.16537347 | 6239.60066 |
| cg05013728 | 0.04237604 | 4.56341366 | 1.05362402 | 19.7648722 |
| cg08769300 | 0.04238441 | 10.6269828 | 1.08462057 | 104.121909 |
| cg02070114 | 0.04238795 | 37125.6338 | 1.43543847 | 960203251  |
| cg02216246 | 0.04239026 | 3.66499648 | 1.04561506 | 12.8462183 |
| cg05718036 | 0.04239676 | 31.9470319 | 1.12621305 | 906.23426  |
| cg00323631 | 0.042398   | 31155359.2 | 1.80749519 | 5.3702E+14 |
| cg15407517 | 0.04239986 | 20209806.8 | 1.78059439 | 2.2938E+14 |
| cg16721449 | 0.04241354 | 3.24E-10   | 2.22E-19   | 0.47331755 |
| cg05534152 | 0.04241552 | 322.088917 | 1.21852498 | 85136.7612 |
| cg22184096 | 0.04242677 | 7325.58345 | 1.35540622 | 39592686   |
| cg07758902 | 0.04242794 | 6107.32185 | 1.34694345 | 27691867.9 |
| cg24281422 | 0.0424389  | 79716261.3 | 1.86021621 | 3.4161E+15 |
| cg26710686 | 0.04245857 | 798550.299 | 1.58787407 | 4.016E+11  |
| cg21120786 | 0.04246361 | 11484.9659 | 1.37417965 | 95987771.5 |
| cg26565099 | 0.04246407 | 5.84968432 | 1.0618928  | 32.2243515 |
| cg02837212 | 0.04246541 | 79.5622643 | 1.16039981 | 5455.14904 |
| cg13372488 | 0.04246552 | 8.1561313  | 1.07394522 | 61.9421517 |
| cg00481081 | 0.04246678 | 1.6827E+10 | 2.22602528 | 1.27E+20   |
| cg01374870 | 0.04246961 | 0.06751766 | 0.00499576 | 0.91250081 |
| cg25753915 | 0.04247397 | 39497194.1 | 1.81098047 | 8.6143E+14 |
| cg06824394 | 0.04247919 | 3.39921474 | 1.04238479 | 11.0848325 |
| cg10096454 | 0.04248475 | 9.04969652 | 1.0775337  | 76.004126  |
| cg23752380 | 0.04248638 | 1989415.38 | 1.63487733 | 2.4208E+12 |

|            |            |            |            |            |
|------------|------------|------------|------------|------------|
| cg00519002 | 0.04249094 | 3.66892256 | 1.04501392 | 12.8811612 |
| cg20395773 | 0.04249542 | 85.5609102 | 1.16254488 | 6297.10685 |
| cg17285947 | 0.0424994  | 92017756.9 | 1.85967967 | 4.5531E+15 |
| cg01522296 | 0.04249984 | 14.8658776 | 1.09560943 | 201.709029 |
| cg22149995 | 0.04250763 | 5.65630617 | 1.06030584 | 30.1741236 |
| cg00375829 | 0.04250783 | 433.336232 | 1.22774066 | 152947.846 |
| cg24424217 | 0.04252083 | 8.3689898  | 1.07429607 | 65.1961709 |
| cg17446896 | 0.04252723 | 4.47687647 | 1.05181538 | 19.0550769 |
| cg00358132 | 0.04253158 | 17.8551628 | 1.10195071 | 289.311343 |
| cg14612733 | 0.04254429 | 4.43366122 | 1.05134678 | 18.6973053 |
| cg16512144 | 0.04254476 | 9.674705   | 1.07928912 | 86.7236733 |
| cg19039291 | 0.04254609 | 608.179865 | 1.24046272 | 298181.269 |
| cg24498636 | 0.04254717 | 0.1346896  | 0.01940576 | 0.93484034 |
| cg24274165 | 0.04256196 | 10929787.6 | 1.72217495 | 6.9366E+13 |
| cg05116002 | 0.04256896 | 3.20165026 | 1.03976189 | 9.85856906 |
| cg12111295 | 0.04258157 | 0.13848175 | 0.02048823 | 0.93601034 |
| cg26328002 | 0.04258828 | 0.00239162 | 7.00E-06   | 0.81733972 |
| cg03547631 | 0.04259079 | 2.2693E+10 | 2.21792419 | 2.32E+20   |
| cg19396878 | 0.04259292 | 3.58104544 | 1.043522   | 12.2890428 |
| cg20234121 | 0.04259803 | 24.9610013 | 1.11334404 | 559.621789 |
| cg21232161 | 0.04259945 | 5.71075944 | 1.05985713 | 30.7709147 |
| cg09788352 | 0.04260008 | 87.098746  | 1.16070923 | 6535.82425 |
| cg16092018 | 0.04260216 | 15225.1424 | 1.37879471 | 168121447  |
| cg12484593 | 0.04260702 | 400.497238 | 1.22108133 | 131357.375 |
| cg15616111 | 0.0426076  | 6885530.14 | 1.69001267 | 2.8053E+13 |
| cg02555579 | 0.04260894 | 28.1852292 | 1.1176767  | 710.766494 |
| cg07891774 | 0.042612   | 21.8579258 | 1.10819971 | 431.121678 |
| cg00487727 | 0.04261448 | 1.5215E+13 | 2.7473018  | 8.43E+25   |
| cg06055873 | 0.04261689 | 6.35930761 | 1.06350766 | 38.0258599 |
| cg13677149 | 0.04261746 | 4.1911002  | 1.04884637 | 16.7472772 |

|            |            |            |            |            |
|------------|------------|------------|------------|------------|
| cg00705992 | 0.04262234 | 8.45382405 | 1.07357499 | 66.5693051 |
| cg14398731 | 0.04262815 | 0.18079343 | 0.03459793 | 0.94474621 |
| cg13995497 | 0.04262905 | 5.03242736 | 1.05515943 | 24.0014205 |
| cg10250177 | 0.04262987 | 8.68793117 | 1.0744692  | 70.2487778 |
| cg07052390 | 0.04263304 | 5.81357976 | 1.06019583 | 31.8787423 |
| cg08857194 | 0.04264678 | 0.00556331 | 3.68E-05   | 0.84191895 |
| cg11046380 | 0.04264829 | 0.12030935 | 0.01552656 | 0.93223088 |
| cg05478348 | 0.04264919 | 31303.6607 | 1.40913841 | 695403066  |
| cg27359972 | 0.04266006 | 180588.371 | 1.4924666  | 2.1851E+10 |
| cg26247841 | 0.04267046 | 3.70914601 | 1.0442522  | 13.1747524 |
| cg02690256 | 0.04267488 | 12.6614755 | 1.08741859 | 147.425252 |
| cg11775521 | 0.0426885  | 3.58649125 | 1.04298079 | 12.3328441 |
| cg00201196 | 0.04269414 | 0.00531637 | 3.36E-05   | 0.84162587 |
| cg05745142 | 0.04269482 | 0.00920177 | 9.88E-05   | 0.85697826 |
| cg24030449 | 0.04270509 | 6.38660361 | 1.06284821 | 38.376793  |
| cg20521696 | 0.04271444 | 7.61720327 | 1.0689279  | 54.2803546 |
| cg15077012 | 0.04272115 | 6696.95492 | 1.33499565 | 33595019.7 |
| cg14677983 | 0.04272266 | 0.01385981 | 0.00022101 | 0.86916301 |
| cg11245681 | 0.04272698 | 3.83548774 | 1.04503801 | 14.0769676 |
| cg19435284 | 0.04272908 | 6.77813956 | 1.06470118 | 43.1512395 |
| cg24277128 | 0.0427338  | 409675.078 | 1.52666567 | 1.0993E+11 |
| cg18998911 | 0.04273815 | 4.91894014 | 1.05350578 | 22.9670996 |
| cg24806195 | 0.04274106 | 79.2465624 | 1.15373453 | 5443.20853 |
| cg11331344 | 0.04274843 | 28.2340129 | 1.11531473 | 714.739493 |
| cg21435190 | 0.04275337 | 10.7968277 | 1.080773   | 107.859364 |
| cg19510318 | 0.04275632 | 151108.333 | 1.47577297 | 1.5472E+10 |
| cg07596663 | 0.04276134 | 28295.9032 | 1.39692195 | 573158823  |
| cg00574958 | 0.04276394 | 8.42224319 | 1.07193212 | 66.1741348 |
| cg22553461 | 0.04277104 | 1.5896E+10 | 2.14885195 | 1.18E+20   |
| cg09099965 | 0.04277123 | 565694397  | 1.92762009 | 1.6601E+17 |

|            |            |            |            |            |
|------------|------------|------------|------------|------------|
| cg00204465 | 0.04278065 | 4.52561722 | 1.050323   | 19.4999169 |
| cg04359753 | 0.04279479 | 4.96894538 | 1.05340867 | 23.4385941 |
| cg10536955 | 0.0427951  | 3.41516072 | 1.04066468 | 11.2075705 |
| cg02622809 | 0.04280273 | 9.94019367 | 1.0772911  | 91.7184318 |
| cg03871329 | 0.04280276 | 261838.831 | 1.49843634 | 4.5754E+10 |
| cg06775930 | 0.04280734 | 3.14782519 | 1.03784758 | 9.54745533 |
| cg07588964 | 0.04280958 | 26327.6183 | 1.39045722 | 498500404  |
| cg23359394 | 0.04281209 | 6.36084964 | 1.06172716 | 38.1081031 |
| cg01423843 | 0.04281704 | 260000877  | 1.87168079 | 3.6118E+16 |
| cg08404201 | 0.04281743 | 734831731  | 1.93558655 | 2.7897E+17 |
| cg03623264 | 0.04281865 | 0.24499292 | 0.06281507 | 0.95552748 |
| cg06659926 | 0.04282034 | 31.1449059 | 1.11760775 | 867.929887 |
| cg26267388 | 0.04282039 | 7.73512255 | 1.06838759 | 56.0022614 |
| cg17066716 | 0.04282618 | 2136022.32 | 1.60139621 | 2.8491E+12 |
| cg06198975 | 0.04283128 | 56.525159  | 1.13912221 | 2804.8734  |
| cg14058998 | 0.04283408 | 336.17797  | 1.2065247  | 93670.3803 |
| cg21770462 | 0.04284153 | 4.17946509 | 1.04718389 | 16.6808605 |
| cg21172458 | 0.04284664 | 4.45952189 | 1.04933835 | 18.9522621 |
| cg04117801 | 0.04284836 | 3.67837153 | 1.04283826 | 12.9746075 |
| cg01978368 | 0.04286397 | 1146592.37 | 1.56568004 | 8.3968E+11 |
| cg16621855 | 0.04286501 | 0.14615744 | 0.02272344 | 0.94008644 |
| cg24153199 | 0.04286645 | 1592801770 | 1.97506202 | 1.2845E+18 |
| cg19006008 | 0.04287088 | 3.50673341 | 1.04109765 | 11.8117443 |
| cg14183329 | 0.0428773  | 4.31585954 | 1.04801334 | 17.7732886 |
| cg01986605 | 0.04288741 | 14.9178778 | 1.09040015 | 204.093036 |
| cg25092681 | 0.04289156 | 3.4615668  | 1.04054018 | 11.5156002 |
| cg00201025 | 0.04289548 | 9.60795102 | 1.07505361 | 85.8680176 |
| cg09481970 | 0.04290253 | 5076412.42 | 1.63780455 | 1.5734E+13 |
| cg10331779 | 0.04290271 | 5.74111821 | 1.05742965 | 31.1703369 |
| cg00904122 | 0.04290517 | 15388.8776 | 1.36063582 | 174049183  |

|            |            |            |            |            |
|------------|------------|------------|------------|------------|
| cg22259932 | 0.04291917 | 20571.7759 | 1.37242164 | 308358563  |
| cg23893802 | 0.0429271  | 1.6978E+13 | 2.63767121 | 1.09E+26   |
| cg00744739 | 0.04293265 | 0.24057466 | 0.06055973 | 0.9556874  |
| cg00779858 | 0.04294343 | 11.2751359 | 1.0799861  | 117.713264 |
| cg08144943 | 0.0429436  | 11.5926611 | 1.08093711 | 124.327115 |
| cg10457397 | 0.04294479 | 1261766.4  | 1.56222812 | 1.0191E+12 |
| cg07929082 | 0.04294488 | 0.09155814 | 0.00904412 | 0.92688906 |
| cg06938101 | 0.04294565 | 165.279246 | 1.17607081 | 23227.5378 |
| cg22256309 | 0.04294644 | 0.15498119 | 0.02548388 | 0.94252415 |
| cg16430951 | 0.04295273 | 98727751   | 1.79299291 | 5.4363E+15 |
| cg01137708 | 0.04296327 | 5642711.37 | 1.63614541 | 1.946E+13  |
| cg20373432 | 0.04297291 | 5.47129718 | 1.0552187  | 28.3686147 |
| cg07375367 | 0.04297716 | 1045.07276 | 1.24572581 | 876739.529 |
| cg16271663 | 0.04299004 | 5.09440106 | 1.05270305 | 24.6536021 |
| cg27291385 | 0.04299906 | 4.90125407 | 1.0513502  | 22.8489913 |
| cg19053889 | 0.04299977 | 26.7757463 | 1.10911043 | 646.410462 |
| cg11159295 | 0.04300145 | 243.514912 | 1.188936   | 49876.1182 |
| cg24028120 | 0.04300475 | 1219580803 | 1.93201716 | 7.6986E+17 |
| cg07213036 | 0.04300586 | 3.41154411 | 1.03937725 | 11.1976986 |
| cg18235937 | 0.04301029 | 8.69317984 | 1.07038198 | 70.6022498 |
| cg07261734 | 0.04301129 | 7.45735436 | 1.06522234 | 52.2070667 |
| cg22419039 | 0.04301463 | 4.57185396 | 1.04893295 | 19.9267729 |
| cg25196508 | 0.0430158  | 8.0339668  | 1.06767343 | 60.4535252 |
| cg20273422 | 0.04301847 | 0.20983478 | 0.0462442  | 0.95213304 |
| cg06866553 | 0.04302193 | 28.5149626 | 1.1109279  | 731.913469 |
| cg03910004 | 0.04302415 | 7.89E-05   | 8.37E-09   | 0.74339676 |
| cg08701937 | 0.04303352 | 452.194983 | 1.21123375 | 168819.853 |
| cg00508024 | 0.04304277 | 0.07226565 | 0.00566996 | 0.92105098 |
| cg14312538 | 0.04304554 | 3.71791202 | 1.04194184 | 13.2664505 |
| cg10467371 | 0.04305069 | 5.96311975 | 1.05741239 | 33.6281259 |

|            |            |            |            |            |
|------------|------------|------------|------------|------------|
| cg14957359 | 0.04305717 | 7.09146974 | 1.06309432 | 47.3043099 |
| cg13077519 | 0.04305973 | 0.13344219 | 0.01896254 | 0.93905254 |
| cg15149938 | 0.04306356 | 0.22902443 | 0.05492095 | 0.95504889 |
| cg10215884 | 0.04306423 | 1540.46188 | 1.25735572 | 1887312.22 |
| cg11923320 | 0.04306669 | 5.85881028 | 1.05669031 | 32.484123  |
| cg12891252 | 0.04306999 | 0.00325513 | 1.27E-05   | 0.83648076 |
| cg22762180 | 0.04307812 | 19302.9601 | 1.35968898 | 274036399  |
| cg02529547 | 0.04309081 | 18.2377068 | 1.09442992 | 303.915254 |
| cg00484488 | 0.04309548 | 8.39814747 | 1.06832006 | 66.0184935 |
| cg07339812 | 0.04309586 | 29252.1733 | 1.37623597 | 621760847  |
| cg12011436 | 0.0430994  | 0.01475429 | 0.00024812 | 0.87733878 |
| cg16208084 | 0.04311035 | 3.00733428 | 1.03470696 | 8.7406965  |
| cg00541638 | 0.04312366 | 7.5077618  | 1.06432737 | 52.9597274 |
| cg06739664 | 0.04313565 | 31510.0996 | 1.37678039 | 721165394  |
| cg07724466 | 0.04313817 | 57.5820318 | 1.13323095 | 2925.87348 |
| cg18380070 | 0.04313952 | 844.232065 | 1.23107837 | 578945.901 |
| cg03805618 | 0.04313972 | 7.16047701 | 1.06261376 | 48.2512392 |
| cg06214007 | 0.04314057 | 4.71238729 | 1.04897999 | 21.1697021 |
| cg13213923 | 0.04314262 | 13.7463528 | 1.08417243 | 174.291662 |
| cg15143070 | 0.04314566 | 129.176414 | 1.16164363 | 14364.5998 |
| cg20152304 | 0.04314717 | 5.2947743  | 1.05270346 | 26.6310844 |
| cg09941876 | 0.04314987 | 1532.89693 | 1.25350089 | 1874568.28 |
| cg22867063 | 0.04315216 | 6.07249163 | 1.05711455 | 34.8828371 |
| cg17829984 | 0.04315528 | 7741.57257 | 1.31732102 | 45495323.3 |
| cg24550302 | 0.04315544 | 6091365.25 | 1.61739891 | 2.2941E+13 |
| cg00334274 | 0.04316249 | 5.01737073 | 1.05083867 | 23.9561122 |
| cg13217116 | 0.04316289 | 1569741.78 | 1.55052288 | 1.5892E+12 |
| cg17366332 | 0.04316536 | 160451103  | 1.787157   | 1.4405E+16 |
| cg12590430 | 0.04316539 | 0.29260357 | 0.08891217 | 0.96293736 |
| cg11967894 | 0.04316688 | 11.1600741 | 1.07693382 | 115.649868 |

|            |            |            |            |            |
|------------|------------|------------|------------|------------|
| cg01940508 | 0.04317746 | 2018.44616 | 1.26293998 | 3225905.38 |
| cg00853296 | 0.04318397 | 51114.4112 | 1.39410069 | 1874099229 |
| cg12284802 | 0.04318643 | 8.14624445 | 1.06636539 | 62.2312947 |
| cg25611476 | 0.04318863 | 86.1687884 | 1.14621806 | 6477.87746 |
| cg13243329 | 0.04319131 | 169596618  | 1.78612458 | 1.6104E+16 |
| cg18169128 | 0.04319966 | 55.53097   | 1.13066666 | 2727.31896 |
| cg05194726 | 0.04320187 | 3.99686686 | 1.04325343 | 15.3126213 |
| cg23806715 | 0.04320225 | 2553607173 | 1.93858947 | 3.3637E+18 |
| cg24628676 | 0.04323038 | 5.8824065  | 1.05540096 | 32.786313  |
| cg06912182 | 0.04323131 | 7.6546585  | 1.06388324 | 55.0754019 |
| cg04287755 | 0.04324337 | 0.17453466 | 0.03212086 | 0.94836653 |
| cg06933384 | 0.04324632 | 7.94772523 | 1.06494636 | 59.3141012 |
| cg18501409 | 0.04324916 | 139.804148 | 1.16171905 | 16824.3775 |
| cg08382220 | 0.04325449 | 10.9881285 | 1.07537214 | 112.276452 |
| cg15342134 | 0.04325667 | 4.99289625 | 1.04994282 | 23.7432101 |
| cg14473522 | 0.04327498 | 3.85910233 | 1.04165867 | 14.2970737 |
| cg01518065 | 0.04327608 | 149521.26  | 1.43340542 | 1.5597E+10 |
| cg16271954 | 0.04327747 | 4.74723455 | 1.04818104 | 21.5003278 |
| cg27233566 | 0.04327855 | 88.8925557 | 1.145166   | 6900.2105  |
| cg24827036 | 0.04328252 | 128931.023 | 1.42650081 | 1.1653E+10 |
| cg17343873 | 0.04328294 | 0.12204758 | 0.01587203 | 0.93848171 |
| cg27662875 | 0.04329331 | 4329.43589 | 1.28704935 | 14563555.9 |
| cg04408225 | 0.04333063 | 36762355   | 1.68538289 | 8.0188E+14 |
| cg02965250 | 0.04333159 | 38.6072336 | 1.11567518 | 1335.97889 |
| cg07718808 | 0.04333498 | 1282504.19 | 1.52372248 | 1.0795E+12 |
| cg05833318 | 0.04333732 | 420.903699 | 1.19826476 | 147847.062 |
| cg09597022 | 0.04334315 | 0.22209672 | 0.05159734 | 0.9559979  |
| cg05090725 | 0.04334443 | 11.508168  | 1.07578637 | 123.10802  |
| cg07460992 | 0.04334998 | 4.33020396 | 1.04475879 | 17.9473641 |
| cg25587223 | 0.04336247 | 4.0522223  | 1.04260548 | 15.7494909 |

|            |            |            |            |            |
|------------|------------|------------|------------|------------|
| cg20275889 | 0.04336289 | 7.60531989 | 1.06235868 | 54.4457271 |
| cg02207686 | 0.04336522 | 7.37386194 | 1.06135724 | 51.2304791 |
| cg10698419 | 0.04336602 | 260.445371 | 1.18029694 | 57470.1069 |
| cg01535980 | 0.04336665 | 7.0833833  | 1.06007292 | 47.331007  |
| cg03631076 | 0.04338035 | 2232233665 | 1.89663371 | 2.6272E+18 |
| cg07647825 | 0.04338431 | 19.5986062 | 1.09244719 | 351.600855 |
| cg13910573 | 0.04339282 | 2613611.83 | 1.55040523 | 4.4059E+12 |
| cg03474795 | 0.04340597 | 147331.046 | 1.42254276 | 1.5259E+10 |
| cg25402787 | 0.0434061  | 8.4882333  | 1.06538729 | 67.6280875 |
| cg16012111 | 0.04340671 | 31.0056052 | 1.10704624 | 868.3897   |
| cg00549566 | 0.04341361 | 3.11381335 | 1.03417018 | 9.375472   |
| cg26104690 | 0.04342292 | 9.84353068 | 1.06988093 | 90.5662427 |
| cg23445859 | 0.04342457 | 3.45548586 | 1.0372949  | 11.511078  |
| cg15767406 | 0.0434259  | 23.8390979 | 1.09815349 | 517.507431 |
| cg20293685 | 0.04343055 | 0.00789106 | 7.18E-05   | 0.86688269 |
| cg00308618 | 0.04343982 | 522.766469 | 1.20248609 | 227266.481 |
| cg17460200 | 0.04344214 | 55374853.1 | 1.69056224 | 1.8138E+15 |
| cg23127998 | 0.04346012 | 9.68525582 | 1.06895089 | 87.7534984 |
| cg23501962 | 0.04346718 | 10.9298194 | 1.07266855 | 111.368    |
| cg26291655 | 0.04346742 | 8.70979619 | 1.06554589 | 71.194071  |
| cg20863668 | 0.04346863 | 3491.80331 | 1.27029406 | 9598321.14 |
| cg07207726 | 0.04347613 | 35.5250348 | 1.11024165 | 1136.71478 |
| cg16818414 | 0.04347848 | 5.55842897 | 1.05150829 | 29.382681  |
| cg04822759 | 0.04348116 | 2126.01286 | 1.25138813 | 3611933.46 |
| cg12651664 | 0.0434895  | 1824941.94 | 1.52410254 | 2.1852E+12 |
| cg15358657 | 0.04348957 | 58814.0235 | 1.37850642 | 2509302328 |
| cg23261237 | 0.04349007 | 39686.8084 | 1.36271401 | 1155813140 |
| cg07820696 | 0.0434988  | 2441551.88 | 1.53615348 | 3.8806E+12 |
| cg09911554 | 0.04349999 | 3362104.95 | 1.55043721 | 7.2907E+12 |
| cg23254528 | 0.0435068  | 18.4763312 | 1.08873312 | 313.552336 |



|            |            |            |            |            |
|------------|------------|------------|------------|------------|
| cg01101663 | 0.04351482 | 9.8317744  | 1.06880401 | 90.4410788 |
| cg12395733 | 0.04352512 | 0.12860279 | 0.01755458 | 0.94212916 |
| cg05493761 | 0.04352799 | 3.33160141 | 1.03558067 | 10.718207  |
| cg14097855 | 0.04354949 | 686.179716 | 1.20815116 | 389721.601 |
| cg07317601 | 0.04355155 | 83413.1264 | 1.3881421  | 5012274802 |
| cg02351804 | 0.04356922 | 5.08860775 | 1.04807695 | 24.7061332 |
| cg04670666 | 0.04357336 | 5.24935881 | 1.04898493 | 26.2689835 |
| cg01916762 | 0.04357749 | 7.8047E+12 | 2.35284955 | 2.59E+25   |
| cg20244273 | 0.04359052 | 10.860164  | 1.07100959 | 110.123348 |
| cg17798749 | 0.04359188 | 79.6658115 | 1.13415796 | 5595.90615 |
| cg02528389 | 0.04361109 | 30028566   | 1.63818404 | 5.5044E+14 |
| cg02499214 | 0.04361364 | 0.2234189  | 0.05210643 | 0.95796255 |
| cg21739584 | 0.04362456 | 20.2801597 | 1.08990635 | 377.357999 |
| cg06650260 | 0.04363113 | 3.66520111 | 1.03781294 | 12.9442394 |
| cg02864688 | 0.04363571 | 9.46627159 | 1.06628577 | 84.039664  |
| cg14325123 | 0.04363766 | 57.0064288 | 1.12233496 | 2895.51074 |
| cg01084740 | 0.04363825 | 23.253338  | 1.09396226 | 494.274573 |
| cg13312337 | 0.04364717 | 39.318171  | 1.11031785 | 1392.32074 |
| cg15993762 | 0.04366792 | 10.9263669 | 1.07028131 | 111.545902 |
| cg08108311 | 0.04367512 | 3.70011049 | 1.03781821 | 13.1919228 |
| cg19770715 | 0.04368055 | 4.09844133 | 1.04079629 | 16.1388175 |
| cg03221702 | 0.04368254 | 45.9820916 | 1.1145863  | 1896.98433 |
| cg13235059 | 0.04368386 | 6.77646309 | 1.05570732 | 43.4973322 |
| cg05778739 | 0.04368942 | 160063.61  | 1.4038205  | 1.825E+10  |
| cg13663300 | 0.04369771 | 4.66262116 | 1.0444809  | 20.8142016 |
| cg00858015 | 0.04369843 | 2819.71566 | 1.25174904 | 6351749.57 |
| cg08145617 | 0.04370028 | 4.70323272 | 1.04471779 | 21.1735631 |
| cg24072474 | 0.04372207 | 7.04995493 | 1.05652734 | 47.0426678 |
| cg00534253 | 0.04372463 | 47509325.8 | 1.64455981 | 1.3725E+15 |
| cg14392392 | 0.04372587 | 519238491  | 1.7588499  | 1.5329E+17 |

|            |            |            |            |            |
|------------|------------|------------|------------|------------|
| cg08376992 | 0.04373088 | 72.1526292 | 1.12782994 | 4615.94583 |
| cg00549412 | 0.04373164 | 12.1888829 | 1.07282142 | 138.484247 |
| cg08417719 | 0.04373406 | 0.25693113 | 0.06858315 | 0.96253386 |
| cg02417264 | 0.04373483 | 0.04143882 | 0.00187785 | 0.91443832 |
| cg07354515 | 0.04373767 | 8.94073004 | 1.06345098 | 75.1672201 |
| cg09736654 | 0.04374477 | 120601.046 | 1.38846001 | 1.0475E+10 |
| cg09124213 | 0.04376072 | 1.7972E+10 | 1.93592953 | 1.67E+20   |
| cg15676542 | 0.04376684 | 10.2314073 | 1.06715168 | 98.0944864 |
| cg08790487 | 0.04377445 | 80.3402594 | 1.13024639 | 5710.75238 |
| cg08441931 | 0.04378603 | 29.6259178 | 1.09900761 | 798.625043 |
| cg24577417 | 0.04379239 | 0.19053662 | 0.03801855 | 0.9549076  |
| cg06241803 | 0.04379767 | 3871487465 | 1.84757905 | 8.1125E+18 |
| cg08755490 | 0.04380989 | 10.2193842 | 1.06662427 | 97.9124675 |
| cg16057262 | 0.04381016 | 4.42883574 | 1.04215829 | 18.8211198 |
| cg00662684 | 0.04382766 | 8.92341521 | 1.06242749 | 74.9484929 |
| cg16399365 | 0.04382909 | 5.91536752 | 1.0503985  | 33.3126646 |
| cg16291917 | 0.04382984 | 3.5113712  | 1.035349   | 11.9087647 |
| cg00206407 | 0.04383363 | 11.2305771 | 1.06913755 | 117.969724 |
| cg16555417 | 0.0438346  | 6.27881601 | 1.05208332 | 37.4718709 |
| cg15458338 | 0.04383741 | 0.14705584 | 0.02280138 | 0.94842576 |
| cg12806353 | 0.04385246 | 9.28227783 | 1.0633162  | 81.0301601 |
| cg24378095 | 0.04385725 | 95122566.4 | 1.65826772 | 5.4565E+15 |
| cg06150940 | 0.0438761  | 2146839.66 | 1.49201927 | 3.089E+12  |
| cg18689240 | 0.04387622 | 4.66997551 | 1.04320286 | 20.9054942 |
| cg15744134 | 0.04388477 | 5.125153   | 1.0458017  | 25.116801  |
| cg27602828 | 0.04389874 | 9.2933559  | 1.06284569 | 81.259645  |
| cg10579631 | 0.04390162 | 0.20798038 | 0.04515244 | 0.95799562 |
| cg01067724 | 0.04390723 | 1.1647E+14 | 2.42117144 | 5.60E+27   |
| cg09444979 | 0.04390824 | 56.0879678 | 1.11619023 | 2818.39067 |
| cg22717014 | 0.04392009 | 4.30981764 | 1.04060027 | 17.8498206 |

|            |            |            |            |            |
|------------|------------|------------|------------|------------|
| cg04437233 | 0.04392026 | 38869.2823 | 1.33360297 | 1132886730 |
| cg25376924 | 0.04392988 | 5.7199E+11 | 2.08816645 | 1.57E+23   |
| cg27205688 | 0.04393376 | 1865.61152 | 1.22715066 | 2836250.23 |
| cg27576271 | 0.04393496 | 7.43448042 | 1.05602681 | 52.3391061 |
| cg12409211 | 0.04393663 | 185.363215 | 1.15242524 | 29814.9676 |
| cg18633561 | 0.04394391 | 4.43619443 | 1.04124968 | 18.9001941 |
| cg21292033 | 0.04394446 | 4.2511987  | 1.04004318 | 17.3768655 |
| cg15207055 | 0.04394683 | 6.05359593 | 1.05004354 | 34.8995277 |
| cg13116174 | 0.04394825 | 192406007  | 1.67727637 | 2.2072E+16 |
| cg04149335 | 0.04395483 | 7.3468E+11 | 2.09583923 | 2.58E+23   |
| cg21660130 | 0.04395788 | 5.397613   | 1.04669273 | 27.8345546 |
| cg06374807 | 0.0439587  | 0.11792914 | 0.01473561 | 0.94378738 |
| cg13411897 | 0.04396034 | 2415.32307 | 1.23461635 | 4725180.81 |
| cg14041079 | 0.04396395 | 2.3235E+10 | 1.90678069 | 2.83E+20   |
| cg13051028 | 0.04396694 | 2677.86979 | 1.23777104 | 5793467.76 |
| cg09318120 | 0.04396863 | 998.602497 | 1.20514429 | 827458.551 |
| cg26544435 | 0.04397364 | 14597.6924 | 1.295438   | 164494652  |
| cg14503783 | 0.04398339 | 262916556  | 1.68623673 | 4.0994E+16 |
| cg12082871 | 0.04399003 | 87.3462307 | 1.12786797 | 6764.41237 |
| cg24855075 | 0.0439923  | 32.4478418 | 1.0981592  | 958.752099 |
| cg03812837 | 0.04399573 | 6.85012261 | 1.05311314 | 44.5575865 |
| cg26923490 | 0.04399987 | 3.45240614 | 1.03386029 | 11.5287416 |
| cg01287088 | 0.04400305 | 6.4766914  | 1.05146052 | 39.8945377 |
| cg04422150 | 0.04400483 | 0.02912858 | 0.00093298 | 0.90941929 |
| cg10087374 | 0.04401844 | 568.778947 | 1.18523034 | 272950.733 |
| cg17567560 | 0.0440299  | 2.97475519 | 1.02957599 | 8.59496384 |
| cg03003689 | 0.04403745 | 5085.92213 | 1.25593307 | 20595527.3 |
| cg11439192 | 0.04404289 | 2136313.2  | 1.47521272 | 3.0937E+12 |
| cg25897951 | 0.04404792 | 14.0270678 | 1.07292845 | 183.384671 |
| cg11358405 | 0.04405016 | 4.84405136 | 1.04293246 | 22.4989003 |

|            |            |            |            |            |
|------------|------------|------------|------------|------------|
| cg11083280 | 0.04405325 | 6.63037531 | 1.05166346 | 41.8022288 |
| cg04897804 | 0.04405823 | 8.6232239  | 1.05899651 | 70.2174083 |
| cg10045881 | 0.04405992 | 6.05062352 | 1.04904612 | 34.8984132 |
| cg11444668 | 0.04406579 | 352.07485  | 1.16860452 | 106072.412 |
| cg21188037 | 0.04407361 | 3.93701139 | 1.03703399 | 14.9465291 |
| cg07890104 | 0.04408035 | 5.48576662 | 1.04614773 | 28.7661432 |
| cg12072376 | 0.04408381 | 0.01899469 | 0.00040074 | 0.90033392 |
| cg04013650 | 0.04408484 | 5.88364979 | 1.04805267 | 33.0301479 |
| cg27295033 | 0.04409926 | 126497442  | 1.63695248 | 9.7752E+15 |
| cg07776900 | 0.04410928 | 156.204727 | 1.14248541 | 21356.8737 |
| cg20811145 | 0.04411374 | 23.6347017 | 1.08691154 | 513.932463 |
| cg15246139 | 0.04412149 | 9463.59058 | 1.27242082 | 70385163   |
| cg07951810 | 0.04412818 | 439641.663 | 1.40710296 | 1.3736E+11 |
| cg16794070 | 0.04414269 | 4.68884754 | 1.0413431  | 21.1124375 |
| cg09307279 | 0.04414404 | 1.2665E+10 | 1.83994551 | 8.7181E+19 |
| cg12990093 | 0.04415212 | 303.676303 | 1.16138354 | 79404.6872 |
| cg02905245 | 0.04415413 | 6.75503019 | 1.05125324 | 43.4057476 |
| cg25635500 | 0.04415989 | 8.41455978 | 1.05725348 | 66.9705208 |
| cg15704219 | 0.04416662 | 5.85629813 | 1.04722722 | 32.7495572 |
| cg19245228 | 0.04417113 | 2287.84276 | 1.22359436 | 4277744.89 |
| cg24643012 | 0.04417138 | 29.8343573 | 1.09262038 | 814.636895 |
| cg14081218 | 0.04417433 | 5.95062548 | 1.04759803 | 33.8010788 |
| cg14859317 | 0.04417438 | 1.49E-07   | 3.37E-14   | 0.66381479 |
| cg05085336 | 0.04417626 | 0.20738258 | 0.04480762 | 0.95982642 |
| cg07805603 | 0.04417788 | 5.29753174 | 1.04439906 | 26.8708042 |
| cg19539664 | 0.04418428 | 0.2090774  | 0.0455307  | 0.96008541 |
| cg07508400 | 0.04418593 | 3832.87884 | 1.23948112 | 11852508.2 |
| cg17349352 | 0.04418728 | 7.36078873 | 1.05329781 | 51.4395932 |
| cg18051889 | 0.04418819 | 65986.1822 | 1.33458888 | 3262559954 |
| cg20844262 | 0.04419624 | 1997.19013 | 1.21819668 | 3274322.19 |

|            |            |            |            |            |
|------------|------------|------------|------------|------------|
| cg20996682 | 0.04419726 | 4.92360423 | 1.04226108 | 23.2589312 |
| cg02829654 | 0.04419971 | 6.00061837 | 1.04760764 | 34.3710943 |
| cg14366571 | 0.04420012 | 7.42836394 | 1.05342358 | 52.3821488 |
| cg04646987 | 0.04420191 | 0.291301   | 0.0876157  | 0.96850532 |
| cg14640066 | 0.04421495 | 4.67786426 | 1.04074583 | 21.0257042 |
| cg23830855 | 0.04421682 | 12962902.8 | 1.52776501 | 1.0999E+14 |
| cg14419393 | 0.04422384 | 3.78081528 | 1.03496968 | 13.8115777 |
| cg02149708 | 0.04422578 | 6.81341168 | 1.05082599 | 44.1772272 |
| cg09668344 | 0.04423012 | 4.85859215 | 1.04165282 | 22.6619822 |
| cg23354735 | 0.04423032 | 23.7413338 | 1.08519776 | 519.399276 |
| cg09663494 | 0.04423245 | 371.937182 | 1.16501618 | 118742.787 |
| cg12293132 | 0.04423449 | 9.95234547 | 1.06106615 | 93.3487323 |
| cg22104487 | 0.0442361  | 271.870287 | 1.15552352 | 63965.3382 |
| cg08425065 | 0.04424561 | 7385679.41 | 1.50254092 | 3.6304E+13 |
| cg08358115 | 0.04425195 | 11189492.1 | 1.51797992 | 8.2481E+13 |
| cg22628500 | 0.04425209 | 5.0961691  | 1.04276611 | 24.9058146 |
| cg03039008 | 0.04425311 | 749827.615 | 1.41595086 | 3.9708E+11 |
| cg23027583 | 0.04425446 | 2.91860373 | 1.02791452 | 8.28692225 |
| cg10923085 | 0.04425783 | 571220928  | 1.67861826 | 1.9438E+17 |
| cg17583733 | 0.04426392 | 1.0319E+12 | 2.03366763 | 5.24E+23   |
| cg02128572 | 0.04427622 | 0.05377057 | 0.00311597 | 0.92788969 |
| cg18356785 | 0.04427836 | 7.84056847 | 1.05412095 | 58.3182734 |
| cg10822582 | 0.0442927  | 419.252041 | 1.16667133 | 150661.346 |
| cg24857620 | 0.04429365 | 2.75107018 | 1.02616692 | 7.37539572 |
| cg07203561 | 0.04429482 | 5.13045508 | 1.04261145 | 25.2458088 |
| cg08937573 | 0.04430137 | 14.3739605 | 1.07029975 | 193.040071 |
| cg10913456 | 0.0443097  | 18.2438402 | 1.07670396 | 309.12648  |
| cg06306636 | 0.04431547 | 6815.09565 | 1.25159295 | 37109132.7 |
| cg00731062 | 0.04431992 | 0.18211776 | 0.03463335 | 0.95765728 |
| cg17696847 | 0.04432034 | 13.0683864 | 1.06746634 | 159.98886  |

|            |            |            |            |            |
|------------|------------|------------|------------|------------|
| cg14300636 | 0.04432147 | 11.1363527 | 1.06312384 | 116.654661 |
| cg12124386 | 0.044322   | 3.7482007  | 1.03412207 | 13.5854449 |
| cg22710329 | 0.04432439 | 535.140526 | 1.17289093 | 244161.989 |
| cg09662887 | 0.04432649 | 1153.15382 | 1.19589045 | 1111944.45 |
| cg01763719 | 0.04432729 | 0.20007044 | 0.04169605 | 0.95999948 |
| cg04839259 | 0.04432764 | 0.00027684 | 9.43E-08   | 0.81235343 |
| cg05098432 | 0.04432943 | 7.92962003 | 1.05391406 | 59.6622405 |
| cg17943647 | 0.04432986 | 5.84975077 | 1.04581106 | 32.7206179 |
| cg15324453 | 0.04433764 | 4202.01105 | 1.23525075 | 14294180.2 |
| cg09865015 | 0.04434083 | 9.93182513 | 1.05982143 | 93.0733685 |
| cg04618532 | 0.04434122 | 7.529E+11  | 1.99780838 | 2.84E+23   |
| cg23887396 | 0.04434277 | 4.22810074 | 1.03714828 | 17.2365285 |
| cg14959291 | 0.04434944 | 31.0809345 | 1.09071916 | 885.676647 |
| cg11437140 | 0.04434962 | 15.1703465 | 1.07112682 | 214.857296 |
| cg26127778 | 0.04435079 | 4.48778332 | 1.03865609 | 19.3906331 |
| cg27139424 | 0.04435567 | 5.71382214 | 1.04497207 | 31.2427138 |
| cg19210712 | 0.04435928 | 28.7002682 | 1.08836019 | 756.831611 |
| cg10481400 | 0.04436389 | 17022693.8 | 1.52137859 | 1.9047E+14 |
| cg14074924 | 0.04437037 | 6178292.03 | 1.48232145 | 2.5751E+13 |
| cg04678743 | 0.04437106 | 10.8953572 | 1.06195616 | 111.783154 |
| cg04031129 | 0.04437676 | 1.0312E+13 | 2.1242044  | 5.01E+25   |
| cg07818096 | 0.04437718 | 1.3418E+12 | 2.01792074 | 8.92E+23   |
| cg18669588 | 0.04438004 | 14.5461066 | 1.06959055 | 197.822632 |
| cg25306939 | 0.04438403 | 11.0346958 | 1.06214415 | 114.640287 |
| cg00983637 | 0.04438792 | 19.5674417 | 1.07747458 | 355.353879 |
| cg23733260 | 0.04439188 | 6.11710649 | 1.0464577  | 35.7577682 |
| cg24041078 | 0.04439192 | 4.03121285 | 1.03557235 | 15.6924594 |
| cg25756617 | 0.04439532 | 12.5953811 | 1.06553827 | 148.885901 |
| cg09987651 | 0.04439729 | 0.24863088 | 0.06401044 | 0.96573793 |
| cg11843238 | 0.04440262 | 4.29778706 | 1.0371621  | 17.8091484 |

|            |            |            |            |            |
|------------|------------|------------|------------|------------|
| cg20561908 | 0.04441573 | 678418.691 | 1.39823372 | 3.2917E+11 |
| cg05877850 | 0.04442268 | 6.67E-08   | 6.72E-15   | 0.6623597  |
| cg23818931 | 0.04442801 | 45000870.7 | 1.55105473 | 1.3056E+15 |
| cg02831290 | 0.04443119 | 126.200439 | 1.12798382 | 14119.4852 |
| cg21153898 | 0.04443128 | 3.51198549 | 1.03176431 | 11.9543212 |
| cg23880581 | 0.04443474 | 4.57205726 | 1.03853654 | 20.1280426 |
| cg05213414 | 0.04444298 | 42.4346451 | 1.0975688  | 1640.62526 |
| cg14482308 | 0.04444452 | 3.22962089 | 1.02954061 | 10.1311701 |
| cg00226923 | 0.04445529 | 12.5013389 | 1.06459872 | 146.800358 |
| cg02701019 | 0.0444564  | 8.08800981 | 1.05316035 | 62.1139059 |
| cg14267284 | 0.04445911 | 447247270  | 1.63770579 | 1.2214E+17 |
| cg15205428 | 0.04445958 | 4.11012937 | 1.03562173 | 16.3120983 |
| cg03103919 | 0.04446123 | 4.21975831 | 1.03628578 | 17.1828665 |
| cg15518400 | 0.04446483 | 195.751795 | 1.13945028 | 33629.1683 |
| cg23527902 | 0.04448178 | 7.79552696 | 1.05194837 | 57.7692235 |
| cg06969125 | 0.04448547 | 346857.461 | 1.36941764 | 8.7855E+10 |
| cg16126958 | 0.04449199 | 10.7062588 | 1.0600942  | 108.126218 |
| cg20984085 | 0.04449483 | 3.56914359 | 1.03179671 | 12.3462168 |
| cg15364537 | 0.04450232 | 52.206151  | 1.10204747 | 2473.10782 |
| cg19006302 | 0.04450313 | 6.03794718 | 1.04515734 | 34.8816439 |
| cg17829936 | 0.0445105  | 4.98225669 | 1.04017875 | 23.8640539 |
| cg06796713 | 0.04451411 | 4.81193552 | 1.03926453 | 22.2799131 |
| cg02376178 | 0.04452602 | 179.382988 | 1.13533862 | 28342.4311 |
| cg22331740 | 0.04452674 | 10.595507  | 1.05942479 | 105.967662 |
| cg06483978 | 0.04453566 | 452.088976 | 1.16098635 | 176043.795 |
| cg14482569 | 0.04454688 | 6.49376048 | 1.04663511 | 40.2899965 |
| cg13813391 | 0.04455134 | 51.5600542 | 1.10073562 | 2415.14778 |
| cg20712415 | 0.04455722 | 5.99603255 | 1.04451503 | 34.4201907 |
| cg10659652 | 0.04457117 | 52258673.2 | 1.53880437 | 1.7747E+15 |
| cg18229710 | 0.04457352 | 0.0007378  | 6.48E-07   | 0.83960298 |

|            |            |            |            |            |
|------------|------------|------------|------------|------------|
| cg20410173 | 0.04458451 | 7639.90177 | 1.24147162 | 47015250.3 |
| cg05192898 | 0.04458592 | 5.85418889 | 1.04366481 | 32.8376768 |
| cg12320968 | 0.04458845 | 256373.2   | 1.35129441 | 4.864E+10  |
| cg19539556 | 0.04459408 | 0.22321661 | 0.051663   | 0.96443595 |
| cg08149078 | 0.04459624 | 1.2675E+11 | 1.8535253  | 8.67E+21   |
| cg09173587 | 0.0445968  | 0.00044346 | 2.37E-07   | 0.82998793 |
| cg10214045 | 0.04459752 | 1.8342E+13 | 2.08963531 | 1.61E+26   |
| cg02144933 | 0.04461088 | 5.44452257 | 1.04163365 | 28.4580151 |
| cg15731317 | 0.04461096 | 0.12671259 | 0.01687465 | 0.95149098 |
| cg10667484 | 0.04461253 | 302.37296  | 1.14733296 | 79688.6432 |
| cg14396066 | 0.04461583 | 256.846658 | 1.14274085 | 57729.8043 |
| cg05819371 | 0.0446189  | 37.6582781 | 1.0911239  | 1299.71117 |
| cg27386912 | 0.04462112 | 166.489256 | 1.13074846 | 24513.562  |
| cg13760347 | 0.04462346 | 7108089.74 | 1.46060024 | 3.4592E+13 |
| cg22315048 | 0.04462538 | 15.242146  | 1.06757434 | 217.617646 |
| cg01716465 | 0.04462698 | 0.16897016 | 0.02979547 | 0.95823012 |
| cg05161019 | 0.04463164 | 0.13868207 | 0.0201656  | 0.9537387  |
| cg10316593 | 0.04463792 | 1488.23923 | 1.1911753  | 1859387.11 |
| cg26013028 | 0.04464853 | 22.8642175 | 1.07765959 | 485.099792 |
| cg10685559 | 0.04465427 | 9.95E-05   | 1.23E-08   | 0.80252095 |
| cg07973470 | 0.0446572  | 8.96286252 | 1.05371737 | 76.2376202 |
| cg24780185 | 0.04466263 | 107.75483  | 1.11799739 | 10385.6266 |
| cg06476131 | 0.04466285 | 3.0961813  | 1.02730122 | 9.33157526 |
| cg24272907 | 0.04466591 | 0.22425197 | 0.05211194 | 0.96501772 |
| cg20693334 | 0.04467232 | 7.05857402 | 1.04758823 | 47.5601631 |
| cg01610915 | 0.04467246 | 10.2005673 | 1.05680313 | 98.4588052 |
| cg03721058 | 0.04467363 | 9.57871513 | 1.05521017 | 86.9511937 |
| cg10597997 | 0.04467963 | 87.8503863 | 1.11218198 | 6939.23342 |
| cg11354857 | 0.04468039 | 0.24030345 | 0.05973496 | 0.96669928 |
| cg17176108 | 0.04468224 | 3411.16355 | 1.21307    | 9592221.97 |



|            |            |            |            |            |
|------------|------------|------------|------------|------------|
| cg11703722 | 0.04469332 | 861.139109 | 1.17365993 | 631835.975 |
| cg11179625 | 0.04469481 | 0.03121451 | 0.00105773 | 0.92116256 |
| cg19638477 | 0.04469859 | 3.87733377 | 1.03259554 | 14.5591536 |
| cg02397499 | 0.04470575 | 1170235011 | 1.63811391 | 8.3599E+17 |
| cg09618904 | 0.04471157 | 7.03409563 | 1.04709644 | 47.2530508 |
| cg26147845 | 0.04471596 | 4.43982919 | 1.03578922 | 19.0309794 |
| cg07574241 | 0.04471772 | 733.96812  | 1.16836427 | 461079.834 |
| cg01427290 | 0.04471807 | 61733931.9 | 1.526523   | 2.4966E+15 |
| cg14882265 | 0.04472226 | 7.45000054 | 1.0484532  | 52.9375159 |
| cg08182191 | 0.0447313  | 5828.30428 | 1.22621119 | 27702512.5 |
| cg14945297 | 0.04473404 | 232.883586 | 1.13669845 | 47712.5349 |
| cg12850695 | 0.0447419  | 2.23E-05   | 6.42E-10   | 0.77775049 |
| cg23753748 | 0.04474398 | 10.2988948 | 1.05623862 | 100.419766 |
| cg19597031 | 0.04475908 | 17.1702367 | 1.06877197 | 275.846519 |
| cg00615592 | 0.04476921 | 28.8996922 | 1.08170043 | 772.110456 |
| cg02524475 | 0.0447743  | 4.8703801  | 1.03761519 | 22.8606929 |
| cg25479916 | 0.04477507 | 3.4583613  | 1.02935788 | 11.6191493 |
| cg07519822 | 0.04477935 | 591544.867 | 1.36297904 | 2.5674E+11 |
| cg13848905 | 0.04477947 | 8.30923183 | 1.05057136 | 65.7197944 |
| cg09802426 | 0.04478648 | 1103.10615 | 1.17704997 | 1033807.56 |
| cg00889769 | 0.04478834 | 5.12727105 | 1.03875099 | 25.308191  |
| cg16768376 | 0.0448136  | 4.97772662 | 1.03784386 | 23.8742679 |
| cg21149967 | 0.04481589 | 1086.26859 | 1.17552428 | 1003789.94 |
| cg13235717 | 0.04484195 | 8.88906867 | 1.0515681  | 75.1406794 |
| cg03476195 | 0.04484219 | 3.94831807 | 1.03210868 | 15.1042384 |
| cg05807768 | 0.04484543 | 20640658.2 | 1.47308562 | 2.8921E+14 |
| cg12963312 | 0.04485374 | 8913529303 | 1.69222968 | 4.695E+19  |
| cg13582435 | 0.04485582 | 6.33614581 | 1.0432846  | 38.4811045 |
| cg07315372 | 0.04486795 | 1.1853E+10 | 1.70077911 | 8.2609E+19 |
| cg03112433 | 0.04486868 | 3.9938111  | 1.032208   | 15.4528226 |

|            |            |            |            |            |
|------------|------------|------------|------------|------------|
| cg02271139 | 0.0448705  | 7.05915674 | 1.04573817 | 47.6521706 |
| cg09144073 | 0.04487394 | 3689089.71 | 1.41310649 | 9.6308E+12 |
| cg01755562 | 0.04487575 | 4.6313898  | 1.03566251 | 20.7111595 |
| cg21857346 | 0.04488376 | 3.56847066 | 1.02946035 | 12.3695709 |
| cg14427668 | 0.04488891 | 6.05779572 | 1.04192589 | 35.2202487 |
| cg08203624 | 0.04490729 | 0.24130581 | 0.0601397  | 0.96822052 |
| cg08370757 | 0.0449094  | 11.2691682 | 1.05653733 | 120.198453 |
| cg04095257 | 0.04491367 | 61.2363526 | 1.09784765 | 3415.67509 |
| cg26477856 | 0.04491792 | 6.14800436 | 1.04202658 | 36.2735061 |
| cg13495347 | 0.04491862 | 3.3429E+10 | 1.73190545 | 6.45E+20   |
| cg11145776 | 0.04492002 | 7.08067384 | 1.04534843 | 47.9609863 |
| cg18592365 | 0.04492106 | 8.12753479 | 1.04860911 | 62.9947056 |
| cg14749465 | 0.04492639 | 3.56110667 | 1.02915753 | 12.3221959 |
| cg07589968 | 0.04493126 | 7.54259484 | 1.04673796 | 54.3505053 |
| cg11692852 | 0.04493403 | 0.00422004 | 2.02E-05   | 0.88378357 |
| cg24867524 | 0.04495357 | 4.91849235 | 1.03650099 | 23.3396467 |
| cg12647497 | 0.04495628 | 7.00604726 | 1.04476109 | 46.9817442 |
| cg05355225 | 0.04496889 | 3.46338985 | 1.02826209 | 11.6653811 |
| cg04614997 | 0.04497018 | 4.29040358 | 1.03320503 | 17.8159826 |
| cg19793804 | 0.04497144 | 468436.748 | 1.34015878 | 1.6374E+11 |
| cg09662051 | 0.04497213 | 7293.31663 | 1.22069868 | 43575428.1 |
| cg17465063 | 0.04497281 | 1164403371 | 1.59675332 | 8.4912E+17 |
| cg17230773 | 0.044976   | 12.785752  | 1.05875076 | 154.404096 |
| cg24840365 | 0.04497686 | 7.5809E+10 | 1.7526428  | 3.28E+21   |
| cg05763263 | 0.0449819  | 2.23E-08   | 7.41E-16   | 0.67422764 |
| cg16571983 | 0.04498889 | 5.05283103 | 1.03685921 | 24.6234987 |
| cg03750606 | 0.04498925 | 7.22975493 | 1.04518907 | 50.0094745 |
| cg12966875 | 0.0449904  | 21.235074  | 1.07063779 | 421.177331 |
| cg25930229 | 0.04499326 | 6.31171962 | 1.04198765 | 38.2325111 |
| cg14633020 | 0.04499871 | 272.740679 | 1.13322291 | 65642.4057 |

|            |            |            |            |            |
|------------|------------|------------|------------|------------|
| cg02267756 | 0.04500229 | 0.01249469 | 0.00017213 | 0.90696285 |
| cg15883716 | 0.0450048  | 3.44974281 | 1.02796255 | 11.5770029 |
| cg11659501 | 0.04500491 | 5.60088517 | 1.03911692 | 30.1890135 |
| cg11831182 | 0.04500569 | 8196.61759 | 1.22221218 | 54969620.7 |
| cg22837289 | 0.04502475 | 134222.035 | 1.29938527 | 1.3865E+10 |
| cg09264282 | 0.04503352 | 14.2735108 | 1.06062523 | 192.087748 |
| cg12733907 | 0.04503547 | 338238.112 | 1.32547288 | 8.6313E+10 |
| cg07357279 | 0.04503704 | 3.70866795 | 1.02942257 | 13.3611    |
| cg03485669 | 0.04503814 | 7.37923571 | 1.0452014  | 52.0982076 |
| cg13007481 | 0.04504369 | 0.12530787 | 0.01643941 | 0.95514769 |
| cg03077077 | 0.04504498 | 5.61548254 | 1.03884971 | 30.3543852 |
| cg11912330 | 0.04504657 | 4.32793544 | 1.03287978 | 18.1347582 |
| cg02992632 | 0.04506351 | 3.75743637 | 1.02955574 | 13.7130294 |
| cg25037394 | 0.04506597 | 4.19544854 | 1.03204008 | 17.0553342 |
| cg22438525 | 0.04506713 | 0.00306871 | 1.07E-05   | 0.88053104 |
| cg08867933 | 0.04507199 | 0.25379924 | 0.06638365 | 0.97033003 |
| cg19979107 | 0.04507201 | 3014.51664 | 1.19239889 | 7621032.36 |
| cg10748355 | 0.04507628 | 4.62519464 | 1.0341815  | 20.6853686 |
| cg13204435 | 0.04507832 | 2379.33316 | 1.18595258 | 4773568.85 |
| cg09721423 | 0.04507923 | 66.9802771 | 1.09659733 | 4091.16217 |
| cg11784697 | 0.04508204 | 2.7987E+10 | 1.69430618 | 4.62E+20   |
| cg25203092 | 0.04508212 | 702421.215 | 1.34323547 | 3.6732E+11 |
| cg21361134 | 0.04508558 | 25.6835677 | 1.07368323 | 614.376413 |
| cg10297971 | 0.04508917 | 1560552.38 | 1.36631936 | 1.7824E+12 |
| cg17588266 | 0.04510473 | 3.43025646 | 1.02725616 | 11.4544549 |
| cg07901138 | 0.04510774 | 3.86445882 | 1.0299116  | 14.5003143 |
| cg11698816 | 0.04511565 | 363000.886 | 1.32135366 | 9.9723E+10 |
| cg09327035 | 0.04511806 | 57.0828699 | 1.09197708 | 2983.99489 |
| cg08413402 | 0.04512472 | 80313.4645 | 1.27807682 | 5046842643 |
| cg01596892 | 0.04512494 | 1934.97138 | 1.1786913  | 3176501.12 |

|            |            |            |            |            |
|------------|------------|------------|------------|------------|
| cg12377709 | 0.04513202 | 701198500  | 1.55554479 | 3.1608E+17 |
| cg00489699 | 0.04513804 | 72252.7901 | 1.27427831 | 4096801796 |
| cg15085431 | 0.04513971 | 24.2846141 | 1.07152405 | 550.377275 |
| cg25385940 | 0.04514276 | 3.97407091 | 1.03031315 | 15.328582  |
| cg22624022 | 0.04514697 | 0.03316834 | 0.00118423 | 0.92899294 |
| cg06719628 | 0.04514998 | 10241.6992 | 1.22085636 | 85917071.2 |
| cg01626459 | 0.04515316 | 4.03629638 | 1.03059153 | 15.8080948 |
| cg24933925 | 0.04515566 | 3685497.91 | 1.38590314 | 9.8008E+12 |
| cg10418044 | 0.04516624 | 0.01089413 | 0.00013081 | 0.90725387 |
| cg22660542 | 0.04517735 | 6.50268122 | 1.0410455  | 40.6176897 |
| cg07482220 | 0.04517801 | 23.0741547 | 1.06975266 | 497.700671 |
| cg18094551 | 0.04517996 | 5752634410 | 1.62024059 | 2.0425E+19 |
| cg19328711 | 0.04518098 | 749.366373 | 1.15270136 | 487159.971 |
| cg06253072 | 0.04518413 | 10.4275645 | 1.05158588 | 103.400115 |
| cg15978039 | 0.04519084 | 5.64189162 | 1.03776402 | 30.6726196 |
| cg04822405 | 0.04520087 | 30.5066916 | 1.07580624 | 865.079782 |
| cg03624316 | 0.04521709 | 0.1929207  | 0.03854628 | 0.96555102 |
| cg03207661 | 0.04521935 | 83832.8229 | 1.27303715 | 5520610460 |
| cg07533422 | 0.04522258 | 4.21624364 | 1.03109388 | 17.2406323 |
| cg18182216 | 0.04522843 | 4.36438819 | 1.03181141 | 18.4606258 |
| cg18167715 | 0.04522929 | 252331748  | 1.50846341 | 4.2209E+16 |
| cg12114392 | 0.04523308 | 1225528.7  | 1.34668698 | 1.1153E+12 |
| cg27201802 | 0.04523538 | 6.46973254 | 1.04041878 | 40.2313375 |
| cg07185695 | 0.04523844 | 6.10316068 | 1.03910563 | 35.8467602 |
| cg01563704 | 0.04523951 | 3.2629237  | 1.02539181 | 10.3830273 |
| cg14947478 | 0.04524039 | 3.68291732 | 1.02802225 | 13.1941501 |
| cg22247664 | 0.04524113 | 7.55602775 | 1.04379612 | 54.6979953 |
| cg20417500 | 0.04524187 | 8.67962279 | 1.04686009 | 71.9636299 |
| cg26727816 | 0.04524285 | 10.1500359 | 1.05032693 | 98.0868189 |
| cg02099543 | 0.04524437 | 5.10157863 | 1.03511729 | 25.1431453 |

|            |            |            |            |            |
|------------|------------|------------|------------|------------|
| cg20740157 | 0.04524497 | 3.05138138 | 1.02390716 | 9.09352794 |
| cg12982543 | 0.04524957 | 5.60866129 | 1.03715472 | 30.3301725 |
| cg23528982 | 0.04525234 | 747985.893 | 1.33106561 | 4.2033E+11 |
| cg22376415 | 0.04525376 | 11467947.7 | 1.41001068 | 9.3272E+13 |
| cg24296478 | 0.04525425 | 9.92245778 | 1.04969752 | 93.7938473 |
| cg15746415 | 0.04525761 | 7657.95321 | 1.20790798 | 48550260.7 |
| cg26912602 | 0.04526266 | 20.8902363 | 1.06622126 | 409.297759 |
| cg21082050 | 0.04526563 | 12.1595414 | 1.05408161 | 140.2685   |
| cg02132760 | 0.04526634 | 120.044245 | 1.10620056 | 13027.1321 |
| cg11055926 | 0.04526781 | 10273.0313 | 1.2149049  | 86867022.2 |
| cg24817528 | 0.04527343 | 0.07707444 | 0.00626974 | 0.94748264 |
| cg07086918 | 0.04527818 | 5.38736092 | 1.03604474 | 28.0139037 |
| cg02494794 | 0.04528131 | 143.353128 | 1.10997097 | 18514.1053 |
| cg05642379 | 0.045282   | 32.298349  | 1.07573928 | 969.736228 |
| cg25836955 | 0.04528324 | 239.214142 | 1.12192439 | 51004.6901 |
| cg02369140 | 0.04528573 | 262.457998 | 1.12404081 | 61282.6514 |
| cg13597422 | 0.0452886  | 16.0107027 | 1.05990718 | 241.853822 |
| cg11701377 | 0.04529006 | 4790735.91 | 1.38072361 | 1.6623E+13 |
| cg25566552 | 0.04529044 | 5.03E-07   | 3.42E-13   | 0.73774799 |
| cg24109980 | 0.0452921  | 3.79181957 | 1.02833515 | 13.9817215 |
| cg10638439 | 0.04531114 | 1096530.98 | 1.33689434 | 8.9938E+11 |
| cg16004427 | 0.04531866 | 6.26551344 | 1.03898861 | 37.7835314 |
| cg20094837 | 0.04532145 | 8.25089944 | 1.04493869 | 65.1496034 |
| cg07949433 | 0.04532524 | 5122199.78 | 1.37925015 | 1.9023E+13 |
| cg12214534 | 0.04532811 | 1393286.59 | 1.3421306  | 1.4464E+12 |
| cg15884014 | 0.04532931 | 0.29785998 | 0.09098335 | 0.97512976 |
| cg15860013 | 0.04533342 | 306509.628 | 1.30012347 | 7.2261E+10 |
| cg02707152 | 0.04533518 | 12.7065059 | 1.0542123  | 153.152541 |
| cg00065570 | 0.04533651 | 55.5014878 | 1.08696276 | 2833.96567 |
| cg07061500 | 0.04534011 | 3518.43424 | 1.1845954  | 10450301.9 |

|            |            |            |            |            |
|------------|------------|------------|------------|------------|
| cg20417723 | 0.04534225 | 0.2276496  | 0.05343935 | 0.96977857 |
| cg25174840 | 0.04534404 | 5084733.1  | 1.37722058 | 1.8773E+13 |
| cg17553286 | 0.04534557 | 17.2857136 | 1.06082923 | 281.662579 |
| cg00494665 | 0.04534651 | 4.03905396 | 1.02934229 | 15.8489135 |
| cg16385335 | 0.04534816 | 6.13102396 | 1.03826637 | 36.204057  |
| cg12448934 | 0.0453557  | 30.6564786 | 1.07332934 | 875.611652 |
| cg03975922 | 0.04536864 | 10.7883549 | 1.05025565 | 110.819306 |
| cg03559133 | 0.04537727 | 1098.06614 | 1.15495563 | 1043978.85 |
| cg11147919 | 0.04538082 | 13.6240025 | 1.0551681  | 175.908884 |
| cg12346504 | 0.04538403 | 52.0303637 | 1.08458037 | 2496.04254 |
| cg27522367 | 0.04539506 | 15.938823  | 1.05838849 | 240.03103  |
| cg20299002 | 0.04540664 | 5504.15564 | 1.19253461 | 25404486.5 |
| cg06931327 | 0.04540666 | 160.615645 | 1.10941189 | 23253.2079 |
| cg07051728 | 0.04541209 | 72.3577577 | 1.09135861 | 4797.36452 |
| cg05397514 | 0.04541366 | 2408860.41 | 1.34977065 | 4.299E+12  |
| cg06403845 | 0.04541445 | 0.24686356 | 0.06270648 | 0.97185515 |
| cg02641095 | 0.04541553 | 189148.028 | 1.28132964 | 2.7922E+10 |
| cg13360404 | 0.04541943 | 403342165  | 1.49770455 | 1.0862E+17 |
| cg10613925 | 0.04541964 | 2.0876E+11 | 1.70113769 | 2.56E+22   |
| cg18404628 | 0.04542887 | 66561.7149 | 1.25347108 | 3534554522 |
| cg27533754 | 0.04543654 | 651211.438 | 1.31238339 | 3.2313E+11 |
| cg27313941 | 0.04544499 | 7.87766729 | 1.0427231  | 59.5149775 |
| cg08402572 | 0.04547506 | 236.247285 | 1.1163016  | 49997.9391 |
| cg09123773 | 0.04547902 | 1.5675E+12 | 1.75913661 | 1.40E+24   |
| cg05576016 | 0.04548079 | 274.41691  | 1.11950901 | 67265.7745 |
| cg07359803 | 0.04548692 | 1275453.08 | 1.3261506  | 1.2267E+12 |
| cg06220958 | 0.04549387 | 20.7204817 | 1.0626492  | 404.026429 |
| cg09240001 | 0.04550537 | 4.66475741 | 1.0312718  | 21.1001229 |
| cg12665414 | 0.04551346 | 5.17778532 | 1.0333632  | 25.9438897 |
| cg23054456 | 0.04553031 | 0.21872629 | 0.04930896 | 0.97023319 |

|            |            |            |            |            |
|------------|------------|------------|------------|------------|
| cg21525449 | 0.04553062 | 576066673  | 1.49334652 | 2.2222E+17 |
| cg21553199 | 0.04553312 | 10.0422251 | 1.04690023 | 96.3284577 |
| cg21656246 | 0.04554632 | 7.42435794 | 1.04051165 | 52.9749866 |
| cg26572651 | 0.04555129 | 62.5953959 | 1.08529378 | 3610.25157 |
| cg00534700 | 0.04555376 | 493.101999 | 1.13045606 | 215089.812 |
| cg04274259 | 0.04555464 | 965.308078 | 1.14554133 | 813431.749 |
| cg00636737 | 0.04556057 | 8.11100199 | 1.04219537 | 63.1247799 |
| cg17929065 | 0.04556823 | 6.45450396 | 1.03743796 | 40.1572172 |
| cg20733500 | 0.04557023 | 378936350  | 1.47571762 | 9.7304E+16 |
| cg16243646 | 0.04557232 | 249.126048 | 1.11477763 | 55673.693  |
| cg20142309 | 0.0455802  | 6.43765044 | 1.03727971 | 39.9538742 |
| cg11908453 | 0.04558158 | 3.9925237  | 1.0275761  | 15.512472  |
| cg16126178 | 0.04558853 | 351.179518 | 1.12185637 | 109931.233 |
| cg15066489 | 0.04559825 | 5.78148853 | 1.03494159 | 32.2970977 |
| cg24138433 | 0.0456031  | 6.60833215 | 1.03760988 | 42.0871607 |
| cg00948900 | 0.04560805 | 0.16604126 | 0.02855358 | 0.96554269 |
| cg13253791 | 0.04560919 | 71.9672309 | 1.0870728  | 4764.43006 |
| cg26317056 | 0.04560934 | 49.1682206 | 1.07901451 | 2240.48323 |
| cg11691214 | 0.04561052 | 0.00491949 | 2.68E-05   | 0.90146936 |
| cg13152070 | 0.04561447 | 5570.62223 | 1.18316494 | 26227815.7 |
| cg24789467 | 0.04562261 | 10.2963664 | 1.04642961 | 101.311316 |
| cg13702181 | 0.04562398 | 5.75186054 | 1.03462639 | 31.9766632 |
| cg11098493 | 0.04564186 | 4.40698692 | 1.02915513 | 18.8713375 |
| cg07602200 | 0.04564524 | 7.71062035 | 1.04033829 | 57.1483973 |
| cg07400063 | 0.04565232 | 15.4760251 | 1.05437312 | 227.156163 |
| cg12385383 | 0.04565772 | 103.7769   | 1.09375209 | 9846.51371 |
| cg03768001 | 0.04566825 | 4733855552 | 1.53570894 | 1.4592E+19 |
| cg18977283 | 0.04567349 | 0.19008913 | 0.03730629 | 0.96857331 |
| cg19695386 | 0.04567633 | 0.19981762 | 0.04118217 | 0.96952357 |
| cg13229245 | 0.04568098 | 5.91968852 | 1.0347301  | 33.8665244 |

|            |            |            |            |            |
|------------|------------|------------|------------|------------|
| cg01869233 | 0.0456818  | 21.5444946 | 1.06070178 | 437.602027 |
| cg20646018 | 0.0456864  | 15532274.3 | 1.37367947 | 1.7562E+14 |
| cg26922546 | 0.04568845 | 8.45564248 | 1.04176222 | 68.6316788 |
| cg01501819 | 0.0456932  | 3.28221923 | 1.023013   | 10.5306219 |
| cg02852419 | 0.04569609 | 0.1670911  | 0.02889161 | 0.9663511  |
| cg00473462 | 0.04570281 | 5705175.69 | 1.34599463 | 2.4182E+13 |
| cg04988673 | 0.04570581 | 3020166759 | 1.51683294 | 6.0135E+18 |
| cg25096282 | 0.04570614 | 6472.25872 | 1.18231404 | 35430631.4 |
| cg06294637 | 0.04570791 | 2522483.15 | 1.32472414 | 4.8032E+12 |
| cg11208222 | 0.04570854 | 3.95117511 | 1.02655411 | 15.2079511 |
| cg26213155 | 0.04571148 | 0.2060012  | 0.04373383 | 0.97033574 |
| cg22112841 | 0.04571964 | 10.0565968 | 1.04488902 | 96.7903163 |
| cg23569090 | 0.04572484 | 0.00339182 | 1.28E-05   | 0.89759035 |
| cg27657283 | 0.04573117 | 4682898.57 | 1.33828541 | 1.6386E+13 |
| cg08027001 | 0.04573174 | 47.6711985 | 1.07605482 | 2111.92136 |
| cg07796520 | 0.04573194 | 37975545.2 | 1.39240893 | 1.0357E+15 |
| cg12910830 | 0.04574231 | 28.9151896 | 1.06572666 | 784.524045 |
| cg01639898 | 0.04574744 | 8.64316511 | 1.0415999  | 71.7207279 |
| cg07057320 | 0.04575196 | 9.81344336 | 1.04405368 | 92.2401527 |
| cg23689441 | 0.0457532  | 905.795229 | 1.13711377 | 721532.9   |
| cg17563229 | 0.04575752 | 6.49441749 | 1.03590047 | 40.7157442 |
| cg25815054 | 0.04576379 | 329667.827 | 1.27019504 | 8.5562E+10 |
| cg23099349 | 0.04576418 | 224935326  | 1.43615564 | 3.523E+16  |
| cg13154413 | 0.04576533 | 3.61457941 | 1.02447365 | 12.7530701 |
| cg06236987 | 0.04576776 | 22.8512427 | 1.06060876 | 492.339219 |
| cg12377368 | 0.04577193 | 6.82504725 | 1.03674078 | 44.9304888 |
| cg05198244 | 0.04577196 | 0.21570741 | 0.04788997 | 0.97159559 |
| cg23520574 | 0.04578492 | 0.23541689 | 0.05694288 | 0.97327547 |
| cg16277607 | 0.04578505 | 6.17503611 | 1.03468136 | 36.8529601 |
| cg15246590 | 0.04579656 | 10.8378605 | 1.04550931 | 112.346412 |



|            |            |            |            |            |
|------------|------------|------------|------------|------------|
| cg04436646 | 0.04580139 | 10633647   | 1.35229675 | 8.3617E+13 |
| cg03145963 | 0.0458143  | 12.2440944 | 1.04768346 | 143.094601 |
| cg12744859 | 0.04581628 | 4.60042884 | 1.02877131 | 20.5720603 |
| cg21065990 | 0.0458196  | 9051496.3  | 1.34646157 | 6.0848E+13 |
| cg26836793 | 0.04582645 | 9035058.19 | 1.34574761 | 6.0659E+13 |
| cg01615475 | 0.0458309  | 0.26592192 | 0.07247059 | 0.97576776 |
| cg24780981 | 0.04583258 | 3.1602E+11 | 1.63262752 | 6.12E+22   |
| cg25355076 | 0.04583406 | 1.1626E+10 | 1.53556251 | 8.8023E+19 |
| cg08711724 | 0.04583991 | 9062252.06 | 1.34451077 | 6.1081E+13 |
| cg00724111 | 0.04585392 | 8.830944   | 1.04092993 | 74.919137  |
| cg26582085 | 0.04585586 | 0.09275469 | 0.00898835 | 0.95717572 |
| cg15954031 | 0.04585925 | 3.75559115 | 1.0246353  | 13.7653513 |
| cg22472290 | 0.04586116 | 4.96994756 | 1.02991429 | 23.9829461 |
| cg23276878 | 0.04586882 | 17.2245789 | 1.05361363 | 281.589103 |
| cg09991769 | 0.04587246 | 0.05434619 | 0.00311548 | 0.94801052 |
| cg20712263 | 0.04587506 | 15.7243473 | 1.05177173 | 235.084375 |
| cg01627785 | 0.04587596 | 368.511668 | 1.11431393 | 121869.471 |
| cg21942576 | 0.04587721 | 78.5164359 | 1.08317274 | 5691.45667 |
| cg09094674 | 0.04588266 | 57.4572518 | 1.07688941 | 3065.62193 |
| cg01025690 | 0.04588624 | 7.99682797 | 1.03871407 | 61.5657948 |
| cg24071007 | 0.04588781 | 6086.99129 | 1.17250013 | 31600391.4 |
| cg14527280 | 0.04589287 | 10994.6588 | 1.1849771  | 102012539  |
| cg05709162 | 0.04589645 | 8.20730781 | 1.03910619 | 64.8248484 |
| cg00177496 | 0.04590454 | 45.9631675 | 1.07209706 | 1970.54244 |
| cg02136620 | 0.04592033 | 7.65288323 | 1.03755465 | 56.4467829 |
| cg12235988 | 0.04592034 | 21004.225  | 1.19756967 | 368393988  |
| cg11908659 | 0.04592124 | 613.505198 | 1.12328886 | 335077.327 |
| cg02921627 | 0.04592231 | 4.77845401 | 1.02872569 | 22.1960264 |
| cg12498453 | 0.04592859 | 4.5775E+10 | 1.55856633 | 1.34E+21   |
| cg07014308 | 0.04593653 | 0.00179493 | 3.61E-06   | 0.89218853 |

|            |            |            |            |            |
|------------|------------|------------|------------|------------|
| cg19637634 | 0.04594963 | 107.837052 | 1.08781631 | 10690.0676 |
| cg14675357 | 0.04595128 | 5.14590424 | 1.02988561 | 25.7119142 |
| cg06129556 | 0.04595293 | 10.1348415 | 1.04249207 | 98.5283397 |
| cg11480267 | 0.04595721 | 0.13022502 | 0.01759054 | 0.96407261 |
| cg19962750 | 0.0459622  | 4.90399728 | 1.0289139  | 23.373374  |
| cg26995224 | 0.04597282 | 5.12399645 | 1.02964288 | 25.4994622 |
| cg27009392 | 0.04597479 | 3.51061509 | 1.02269395 | 12.050935  |
| cg07119434 | 0.04597809 | 4.65217377 | 1.02782856 | 21.0567419 |
| cg08711320 | 0.04598187 | 0.11461894 | 0.01365505 | 0.96209849 |
| cg05300440 | 0.04598875 | 0.11248311 | 0.01315441 | 0.96184104 |
| cg22507887 | 0.04599142 | 0.34095554 | 0.11849795 | 0.98103537 |
| cg11133895 | 0.04599345 | 2223.30445 | 1.14690358 | 4309937.42 |
| cg21784917 | 0.04599588 | 4.490981   | 1.02705766 | 19.6375637 |
| cg24404083 | 0.04600076 | 16855082.1 | 1.34366153 | 2.1143E+14 |
| cg16911672 | 0.04600986 | 5.56200869 | 1.03085792 | 30.0098978 |
| cg22054580 | 0.04601947 | 371.188289 | 1.11019321 | 124105.196 |
| cg10003018 | 0.04602808 | 103344583  | 1.38446476 | 7.7142E+15 |
| cg22733687 | 0.04602939 | 14.7529292 | 1.04857363 | 207.566654 |
| cg06487247 | 0.0460303  | 25.6497399 | 1.05883002 | 621.354842 |
| cg13862524 | 0.04603391 | 24474.5173 | 1.1946812  | 501390662  |
| cg05128626 | 0.0460439  | 393185.296 | 1.25379331 | 1.233E+11  |
| cg21332729 | 0.04604624 | 1754.14271 | 1.14004691 | 2699026.35 |
| cg05245650 | 0.04604923 | 14.7762086 | 1.04834984 | 208.266678 |
| cg02149136 | 0.04605359 | 980.313612 | 1.1282088  | 851805.782 |
| cg14066905 | 0.04606665 | 0.14276113 | 0.02108511 | 0.9665939  |
| cg24228707 | 0.04607111 | 4.79494358 | 1.02770645 | 22.3716451 |
| cg10290107 | 0.04607533 | 19864766   | 1.3399828  | 2.9449E+14 |
| cg17707347 | 0.04607951 | 1286287.97 | 1.27726649 | 1.2954E+12 |
| cg27569321 | 0.04608163 | 14521128.3 | 1.33206585 | 1.583E+14  |
| cg24341452 | 0.04608462 | 6.68472754 | 1.03355736 | 43.2347386 |

|            |            |            |            |            |
|------------|------------|------------|------------|------------|
| cg08210001 | 0.0460892  | 4398689.63 | 1.30400785 | 1.4838E+13 |
| cg02606403 | 0.04608955 | 6.17109422 | 1.03208096 | 36.8986593 |
| cg02102889 | 0.04609091 | 7.38447261 | 1.03528778 | 52.6717662 |
| cg26306869 | 0.04609201 | 28.6401691 | 1.05989823 | 773.90382  |
| cg10497692 | 0.0460979  | 4631.13401 | 1.1573536  | 18531417   |
| cg21969477 | 0.04610016 | 7.01812207 | 1.03429034 | 47.6210938 |
| cg24080793 | 0.04610052 | 3.196875   | 1.02031111 | 10.0165623 |
| cg21817179 | 0.04610059 | 5.82748842 | 1.03096501 | 32.9396449 |
| cg05512327 | 0.04610127 | 8.82404382 | 1.03838515 | 74.9854229 |
| cg13263104 | 0.04610241 | 4616.71468 | 1.15709232 | 18420357.8 |
| cg05136531 | 0.04610524 | 5.80458204 | 1.03085664 | 32.6846348 |
| cg26337738 | 0.04610732 | 5.1167E+11 | 1.59303881 | 1.64E+23   |
| cg23401756 | 0.04611987 | 24.6580012 | 1.05672442 | 575.378985 |
| cg26085197 | 0.0461229  | 20193.5836 | 1.18591319 | 343853850  |
| cg12985929 | 0.04612746 | 6.19024537 | 1.03181463 | 37.1376182 |
| cg15564619 | 0.046131   | 4.90459053 | 1.02766991 | 23.4073295 |
| cg09833538 | 0.04613222 | 61.5464298 | 1.07324877 | 3529.43616 |
| cg22614265 | 0.04613497 | 5148311.26 | 1.30340693 | 2.0335E+13 |
| cg15857427 | 0.04613828 | 34085.6174 | 1.19577365 | 971613073  |
| cg03752087 | 0.04613845 | 0.22038883 | 0.04984604 | 0.97442509 |
| cg09818930 | 0.04614359 | 165708.09  | 1.22825725 | 2.2356E+10 |
| cg16214500 | 0.04614987 | 3831.4221  | 1.15133173 | 12750274.2 |
| cg11948456 | 0.04615295 | 5.45106865 | 1.02936213 | 28.8665656 |
| cg27468077 | 0.0461602  | 1177.64309 | 1.12799429 | 1229477.18 |
| cg03082517 | 0.04618036 | 120651.604 | 1.21923964 | 1.1939E+10 |
| cg21117673 | 0.04618112 | 7.47053627 | 1.03464876 | 53.9399595 |
| cg12114584 | 0.04619339 | 5.73463459 | 1.02992522 | 31.9305064 |
| cg23737055 | 0.04620671 | 57664566.2 | 1.35070232 | 2.4618E+15 |
| cg08263387 | 0.04620795 | 10630.0954 | 1.16873195 | 96685068.5 |
| cg00286388 | 0.04621414 | 107.320762 | 1.08166718 | 10648.1423 |

|            |            |            |            |            |
|------------|------------|------------|------------|------------|
| cg20438404 | 0.04621621 | 22.4995334 | 1.05363299 | 480.460471 |
| cg12074252 | 0.04621692 | 27038767.7 | 1.33255254 | 5.4864E+14 |
| cg01605945 | 0.04621695 | 223503.443 | 1.22954036 | 4.0628E+10 |
| cg18546840 | 0.04621746 | 4.76506543 | 1.02653585 | 22.1189046 |
| cg26867866 | 0.04622118 | 102199298  | 1.36212941 | 7.6679E+15 |
| cg02764409 | 0.04622996 | 1186077.61 | 1.26341634 | 1.1135E+12 |
| cg23717686 | 0.04623161 | 269774314  | 1.38320367 | 5.2616E+16 |
| cg24645214 | 0.0462368  | 3.00876581 | 1.01855132 | 8.88779144 |
| cg20979732 | 0.0462398  | 11720.5384 | 1.16907936 | 117503590  |
| cg02675375 | 0.04624017 | 1.6023E+11 | 1.53746217 | 1.67E+22   |
| cg17013303 | 0.04624143 | 0.21562368 | 0.04769773 | 0.97475444 |
| cg20707345 | 0.0462481  | 29399.6349 | 1.18668681 | 728362803  |
| cg24317255 | 0.04625297 | 86.2117982 | 1.07685667 | 6902.00877 |
| cg03324464 | 0.04625654 | 8.20116438 | 1.03554421 | 64.9504837 |
| cg00952134 | 0.04625743 | 1569812.09 | 1.26711111 | 1.9448E+12 |
| cg06103243 | 0.04626731 | 5.11947328 | 1.02739486 | 25.5101594 |
| cg00910297 | 0.04627061 | 88387728.6 | 1.35329189 | 5.7729E+15 |
| cg05657581 | 0.04628115 | 1960.59199 | 1.13313678 | 3392283.27 |
| cg12757705 | 0.04628237 | 14317.3859 | 1.17083566 | 175077978  |
| cg13587740 | 0.04628335 | 67.8141741 | 1.07195189 | 4290.08265 |
| cg21305021 | 0.04629205 | 19.5913389 | 1.05012052 | 365.501437 |
| cg26344619 | 0.04629519 | 9.67528447 | 1.03797897 | 90.1859602 |
| cg20566766 | 0.04630037 | 9.69236357 | 1.03795396 | 90.5068198 |
| cg24842334 | 0.04630587 | 0.153214   | 0.02420686 | 0.96974719 |
| cg13736939 | 0.04630749 | 0.14232569 | 0.02091347 | 0.96859102 |
| cg12350309 | 0.04631886 | 6.071757   | 1.0298682  | 35.7970399 |
| cg14170423 | 0.0463219  | 8.36253121 | 1.03523158 | 67.5519657 |
| cg25034947 | 0.04632345 | 20905.0526 | 1.17599603 | 371617941  |
| cg07205462 | 0.04633277 | 7486236.65 | 1.29341879 | 4.333E+13  |
| cg27142680 | 0.04633762 | 12.3325315 | 1.0416239  | 146.013675 |

|            |            |            |            |            |
|------------|------------|------------|------------|------------|
| cg02176069 | 0.04634495 | 6.90503183 | 1.03179726 | 46.2101096 |
| cg05020510 | 0.04634601 | 17.5296381 | 1.04747355 | 293.361311 |
| cg07717763 | 0.04634812 | 0.01001922 | 0.00010815 | 0.92820157 |
| cg04279588 | 0.04635212 | 8966593.87 | 1.2954101  | 6.2065E+13 |
| cg04853708 | 0.04635296 | 12.9856299 | 1.04231215 | 161.781271 |
| cg16734795 | 0.04635407 | 0.17746834 | 0.03238733 | 0.97244868 |
| cg26271948 | 0.0463767  | 2206763.33 | 1.26433221 | 3.8517E+12 |
| cg05020775 | 0.04637971 | 75.6239121 | 1.07186491 | 5335.5381  |
| cg03161190 | 0.04638534 | 4.01305191 | 1.02250744 | 15.7500913 |
| cg00046018 | 0.04638794 | 243808.377 | 1.2196268  | 4.8738E+10 |
| cg10083572 | 0.04640324 | 9.30003937 | 1.03618003 | 83.4707578 |
| cg24524044 | 0.0464044  | 30.191538  | 1.05579095 | 863.36123  |
| cg06620654 | 0.0464047  | 74.2134449 | 1.07102216 | 5142.41029 |
| cg00512404 | 0.04640611 | 3.5507804  | 1.02038409 | 12.3561721 |
| cg20265830 | 0.04641444 | 155737.96  | 1.20918291 | 2.0058E+10 |
| cg02845204 | 0.04641775 | 0.19165959 | 0.03770934 | 0.97411937 |
| cg14222679 | 0.04641871 | 0.07601576 | 0.00601956 | 0.95993612 |
| cg03592345 | 0.04642541 | 9.64440084 | 1.03654626 | 89.7349895 |
| cg02643054 | 0.04642766 | 4.20281832 | 1.0229847  | 17.2668093 |
| cg03506033 | 0.04643264 | 2.87784267 | 1.01684706 | 8.14476316 |
| cg02616786 | 0.04643464 | 0.12698627 | 0.01665984 | 0.96792735 |
| cg12661343 | 0.04643641 | 337.541204 | 1.09627066 | 103928.772 |
| cg01577751 | 0.04644685 | 0.16011829 | 0.02638791 | 0.97157631 |
| cg19917249 | 0.04645545 | 0.00119839 | 1.60E-06   | 0.89975969 |
| cg21793358 | 0.04646583 | 7.99365151 | 1.03307832 | 61.8524881 |
| cg25852200 | 0.04646611 | 245.707039 | 1.08998643 | 55387.7986 |
| cg27366305 | 0.04647084 | 63.210869  | 1.06697039 | 3744.82177 |
| cg02235894 | 0.0464726  | 1.2747E+14 | 1.66112658 | 9.78E+27   |
| cg27621129 | 0.04647866 | 7.19966085 | 1.03127031 | 50.2633654 |
| cg06139836 | 0.04648129 | 5.60217642 | 1.02722162 | 30.5526869 |

|            |            |            |            |            |
|------------|------------|------------|------------|------------|
| cg27333706 | 0.04648472 | 5.76494233 | 1.02765248 | 32.3402712 |
| cg22910715 | 0.04649635 | 6276700365 | 1.41921234 | 2.776E+19  |
| cg00040590 | 0.04649862 | 0.09702488 | 0.00976064 | 0.96446872 |
| cg09251737 | 0.04650194 | 29.6413169 | 1.0539132  | 833.662266 |
| cg17121120 | 0.04650284 | 265944.817 | 1.21346411 | 5.8285E+10 |
| cg00591406 | 0.04650544 | 562.943373 | 1.10298854 | 287315.079 |
| cg14505694 | 0.04650558 | 568.124264 | 1.10314058 | 292587.531 |
| cg08478189 | 0.04650924 | 60772655   | 1.31929251 | 2.7995E+15 |
| cg02147791 | 0.04652014 | 2523202.73 | 1.25506041 | 5.0727E+12 |
| cg07537370 | 0.04652141 | 5.77787661 | 1.02739104 | 32.4938187 |
| cg08274892 | 0.04652757 | 3313.2612  | 1.13275351 | 9691163.76 |
| cg05800928 | 0.04653493 | 1508895.15 | 1.24397736 | 1.8302E+12 |
| cg26755793 | 0.04653522 | 6.79331818 | 1.02983427 | 44.8122318 |
| cg12422930 | 0.04653717 | 79486.5345 | 1.18890344 | 5314232403 |
| cg20066782 | 0.04654718 | 10.8740178 | 1.03716183 | 114.007536 |
| cg07474312 | 0.04656377 | 3554.3198  | 1.13246978 | 11155431.7 |
| cg13264159 | 0.04656886 | 43414.4202 | 1.17613753 | 1602543779 |
| cg17845761 | 0.04657567 | 13.3921403 | 1.04012467 | 172.430697 |
| cg01143804 | 0.04657698 | 47.6475883 | 1.06030951 | 2141.16033 |
| cg07073662 | 0.04658078 | 16781.2836 | 1.15867061 | 243047056  |
| cg05525106 | 0.04658239 | 55.3254901 | 1.0626096  | 2880.55921 |
| cg02809940 | 0.04658322 | 0.15473032 | 0.02462698 | 0.97216452 |
| cg01454947 | 0.04658629 | 12029.4607 | 1.15257776 | 125551549  |
| cg09312407 | 0.04658681 | 11.1772268 | 1.03715211 | 120.455234 |
| cg26164735 | 0.04660507 | 3853799.19 | 1.25598885 | 1.1825E+13 |
| cg10127573 | 0.04661745 | 1169.58507 | 1.11158283 | 1230613.85 |
| cg16664523 | 0.0466201  | 4.28705987 | 1.02201826 | 17.9829295 |
| cg18805066 | 0.04662146 | 3.97842759 | 1.02086779 | 15.5043447 |
| cg11637682 | 0.04662673 | 5.63615458 | 1.02615785 | 30.9564834 |
| cg18523666 | 0.04663966 | 0.23053213 | 0.05431778 | 0.97841    |

|            |            |            |            |            |
|------------|------------|------------|------------|------------|
| cg23733826 | 0.04664072 | 630446.064 | 1.21966311 | 3.2588E+11 |
| cg19159961 | 0.04665803 | 6.41219615 | 1.02786801 | 40.0014973 |
| cg08283206 | 0.04666461 | 4.77983526 | 1.02336339 | 22.325232  |
| cg19945554 | 0.04667394 | 3.58811336 | 1.01898553 | 12.6346813 |
| cg20646120 | 0.04667585 | 127.889568 | 1.07397941 | 15229.1017 |
| cg01751433 | 0.04667731 | 705403.517 | 1.21900262 | 4.082E+11  |
| cg06228542 | 0.04668102 | 5.03549396 | 1.02402889 | 24.7612149 |
| cg08137352 | 0.04668578 | 189844005  | 1.32258525 | 2.725E+16  |
| cg06126413 | 0.04669352 | 0.07149814 | 0.00531318 | 0.9621331  |
| cg19119538 | 0.04669503 | 95.5354369 | 1.06896112 | 8538.21484 |
| cg02418535 | 0.0466984  | 57.1793212 | 1.06090089 | 3081.79098 |
| cg20717612 | 0.04670365 | 76.8614581 | 1.06538701 | 5545.10586 |
| cg13411656 | 0.04670922 | 25.8841457 | 1.04852079 | 638.984945 |
| cg08944563 | 0.04671578 | 103882.844 | 1.18278196 | 9123951504 |
| cg26732808 | 0.0467182  | 0.17076824 | 0.02991997 | 0.9746597  |
| cg08378505 | 0.04673137 | 58.7498554 | 1.06068142 | 3254.08311 |
| cg19382808 | 0.04673375 | 0.00165753 | 3.01E-06   | 0.91162254 |
| cg17638841 | 0.04673791 | 5.52283625 | 1.02497209 | 29.7585861 |
| cg11327408 | 0.04674618 | 0.03253373 | 0.00111195 | 0.95188147 |
| cg18396533 | 0.04674725 | 8.4261809  | 1.03114884 | 68.8557481 |
| cg08462055 | 0.04674864 | 7.55862562 | 1.02952473 | 55.4943653 |
| cg18237323 | 0.04674903 | 4.1212285  | 1.02057831 | 16.6420588 |
| cg21298759 | 0.04675741 | 10.0297514 | 1.03362874 | 97.3230618 |
| cg24952959 | 0.04675764 | 0.00887653 | 8.43E-05   | 0.93447447 |
| cg02671204 | 0.04676404 | 6.10977472 | 1.02624964 | 36.3745289 |
| cg16238618 | 0.04676523 | 25652308.6 | 1.27653283 | 5.1549E+14 |
| cg03600270 | 0.04678063 | 1541442.05 | 1.22497669 | 1.9397E+12 |
| cg19026976 | 0.04678575 | 0.15601211 | 0.02499131 | 0.97392962 |
| cg13745957 | 0.04678629 | 27731.5979 | 1.15654805 | 664945587  |
| cg03169018 | 0.04678989 | 5.01360413 | 1.02315726 | 24.5673146 |

|            |            |            |            |            |
|------------|------------|------------|------------|------------|
| cg21578457 | 0.04679203 | 0.18104432 | 0.03358168 | 0.97603947 |
| cg18343556 | 0.04679557 | 20.7313305 | 1.04391001 | 411.709879 |
| cg16303686 | 0.04681268 | 8580677578 | 1.38052648 | 5.3333E+19 |
| cg26774156 | 0.04681887 | 6.02322547 | 1.02558707 | 35.374125  |
| cg01528492 | 0.04681923 | 6.61183595 | 1.02693027 | 42.5699541 |
| cg13572237 | 0.04681991 | 68.4225509 | 1.06123967 | 4411.48743 |
| cg06351970 | 0.04682844 | 1118438429 | 1.33946004 | 9.3389E+17 |
| cg13934106 | 0.04683385 | 38689260   | 1.27717693 | 1.172E+15  |
| cg06189038 | 0.04683736 | 12.8233692 | 1.03633033 | 158.674114 |
| cg16373176 | 0.04683943 | 9.81461754 | 1.03243961 | 93.3000985 |
| cg01792145 | 0.04684612 | 15.8575806 | 1.03930068 | 241.953908 |
| cg17014757 | 0.04684713 | 4.22949462 | 1.02031157 | 17.5325118 |
| cg05727199 | 0.04684913 | 7.01044835 | 1.02750817 | 47.8306522 |
| cg02614658 | 0.04685159 | 60.734028  | 1.05884415 | 3483.63084 |
| cg17075352 | 0.04686075 | 5.58131148 | 1.02415739 | 30.4162603 |
| cg06561044 | 0.04686829 | 593680.589 | 1.20214586 | 2.9319E+11 |
| cg07234028 | 0.04687765 | 1417.84582 | 1.10538707 | 1818627.01 |
| cg00078221 | 0.04687779 | 4.37780639 | 1.02059487 | 18.7784491 |
| cg10896318 | 0.04687904 | 173.932382 | 1.07378866 | 28173.5827 |
| cg07382149 | 0.04688208 | 6196186012 | 1.3645987  | 2.8135E+19 |
| cg08450897 | 0.04688922 | 371.855247 | 1.08481524 | 127465.322 |
| cg19272891 | 0.04690238 | 3.76E-08   | 1.79E-15   | 0.79125352 |
| cg02382109 | 0.04690427 | 8.83696293 | 1.0302738  | 75.7972435 |
| cg08303370 | 0.04691171 | 377579.9   | 1.19165411 | 1.1964E+11 |
| cg25640615 | 0.04692466 | 8580684836 | 1.36476867 | 5.3949E+19 |
| cg07312366 | 0.04692798 | 15763873.3 | 1.25243343 | 1.9841E+14 |
| cg17279557 | 0.04692841 | 1144333.53 | 1.20857107 | 1.0835E+12 |
| cg20720680 | 0.04692921 | 147.016632 | 1.07009922 | 20198.0244 |
| cg03248196 | 0.04694346 | 4587821288 | 1.35066807 | 1.5583E+19 |
| cg11992375 | 0.04695714 | 6.89351154 | 1.02630798 | 46.3023791 |



|            |            |            |            |            |
|------------|------------|------------|------------|------------|
| cg07476963 | 0.04696226 | 24.6509218 | 1.04397327 | 582.072323 |
| cg09023593 | 0.04696642 | 76485917.2 | 1.27559644 | 4.5862E+15 |
| cg04575343 | 0.04696998 | 18754824   | 1.25144321 | 2.8107E+14 |
| cg18764192 | 0.04697068 | 321.260825 | 1.08035705 | 95531.8592 |
| cg25244036 | 0.04697964 | 15.0153352 | 1.03682824 | 217.45192  |
| cg21682902 | 0.0469905  | 0.0046649  | 2.34E-05   | 0.93109116 |
| cg07713896 | 0.04699651 | 4.98469146 | 1.02155287 | 24.3229203 |
| cg07842386 | 0.04699672 | 7.23416437 | 1.02661406 | 50.9764441 |
| cg25485294 | 0.04700131 | 4.40389856 | 1.0198418  | 19.0169913 |
| cg14230666 | 0.04701377 | 3.32921243 | 1.0159995  | 10.909115  |
| cg07126559 | 0.0470172  | 6.96410676 | 1.02591315 | 47.2737705 |
| cg16107483 | 0.04702611 | 19.5728881 | 1.03986036 | 368.412878 |
| cg06996372 | 0.04702667 | 2.29E-05   | 6.01E-10   | 0.86900019 |
| cg01894508 | 0.04703229 | 0.04948773 | 0.00254751 | 0.96134465 |
| cg16215361 | 0.04703271 | 4.17569315 | 1.01891817 | 17.1126728 |
| cg05551889 | 0.04704069 | 3.49983902 | 1.01651645 | 12.0498524 |
| cg12564291 | 0.04704182 | 7.0707E+10 | 1.38618554 | 3.61E+21   |
| cg23753351 | 0.04704675 | 4.61291337 | 1.02015149 | 20.8586371 |
| cg07625430 | 0.04705445 | 55.042653  | 1.05355114 | 2875.69682 |
| cg06685724 | 0.04705859 | 18.6679099 | 1.03877167 | 335.4836   |
| cg06173216 | 0.04706687 | 4.53477616 | 1.01978533 | 20.1652193 |
| cg00036328 | 0.04706703 | 1324.49645 | 1.09763649 | 1598243.91 |
| cg05986680 | 0.04706791 | 4.3214E+11 | 1.41494498 | 1.32E+23   |
| cg11977634 | 0.04707491 | 5086228602 | 1.33488106 | 1.938E+19  |
| cg04706867 | 0.04707597 | 5.82152679 | 1.0230185  | 33.1276259 |
| cg24619626 | 0.04708012 | 0.1346524  | 0.01860637 | 0.97446564 |
| cg06491137 | 0.04708151 | 172.714494 | 1.0686821  | 27913.1621 |
| cg13694291 | 0.0470837  | 102299.188 | 1.16024307 | 9019768430 |
| cg03922571 | 0.04708538 | 4493061444 | 1.33135704 | 1.5163E+19 |
| cg24260917 | 0.04708804 | 0.16953293 | 0.02940518 | 0.97742709 |

|            |            |            |            |            |
|------------|------------|------------|------------|------------|
| cg06052921 | 0.04709065 | 6.09586591 | 1.02350572 | 36.3061786 |
| cg05263790 | 0.04709399 | 1800983.52 | 1.20312402 | 2.6959E+12 |
| cg13733266 | 0.04709597 | 7.40683852 | 1.0260227  | 53.4698276 |
| cg25189267 | 0.04709655 | 111.391243 | 1.06231849 | 11680.1215 |
| cg21030939 | 0.04710122 | 3988411421 | 1.32723607 | 1.1985E+19 |
| cg21989213 | 0.04710246 | 6.05207295 | 1.02331361 | 35.7931201 |
| cg27601809 | 0.04710704 | 3.74887081 | 1.0170316  | 13.8186782 |
| cg01938354 | 0.04711885 | 6665415.92 | 1.22137222 | 3.6375E+13 |
| cg21663536 | 0.04712984 | 219.451614 | 1.0707387  | 44977.3702 |
| cg25755953 | 0.04714008 | 70328.9823 | 1.15141047 | 4295744992 |
| cg06182322 | 0.04714332 | 543935.781 | 1.18132583 | 2.5045E+11 |
| cg01024247 | 0.04714606 | 10.9899137 | 1.03067624 | 117.183455 |
| cg12871376 | 0.04715633 | 7.46261733 | 1.02556494 | 54.3024192 |
| cg25170591 | 0.04715945 | 3.33261109 | 1.01521651 | 10.9398307 |
| cg05468346 | 0.04716411 | 23.6270175 | 1.04040325 | 536.5573   |
| cg18146843 | 0.04717231 | 3.30592936 | 1.01504435 | 10.7671837 |
| cg00315391 | 0.04717498 | 697.543347 | 1.08511818 | 448399.752 |
| cg21128569 | 0.04718184 | 4.83279256 | 1.0198005  | 22.9024049 |
| cg03226554 | 0.04718634 | 0.00013014 | 1.89E-08   | 0.89478719 |
| cg05802477 | 0.04718864 | 128193505  | 1.26084202 | 1.3034E+16 |
| cg01434523 | 0.04719065 | 0.01825706 | 0.00035029 | 0.95154862 |
| cg10768682 | 0.04719399 | 154.806576 | 1.06447206 | 22513.5793 |
| cg07869548 | 0.04719845 | 7.8223719  | 1.02577424 | 59.6520169 |
| cg20166027 | 0.04720161 | 4.22102792 | 1.01795465 | 17.5028197 |
| cg01855674 | 0.04720171 | 17430.992  | 1.1282597  | 269299245  |
| cg01535312 | 0.04720872 | 0.25200332 | 0.06459374 | 0.98315518 |
| cg08386490 | 0.04721884 | 362.965722 | 1.07506733 | 122544.99  |
| cg08757348 | 0.04721943 | 7.33642835 | 1.02476914 | 52.5222498 |
| cg10852177 | 0.04722662 | 3.29026805 | 1.01469085 | 10.6691253 |
| cg22610434 | 0.04723281 | 0.2649675  | 0.07135633 | 0.9839039  |

|            |            |            |            |            |
|------------|------------|------------|------------|------------|
| cg16994128 | 0.04723497 | 558023.008 | 1.17531942 | 2.6494E+11 |
| cg08617683 | 0.0472404  | 4.57689943 | 1.01870478 | 20.563375  |
| cg25938977 | 0.04724434 | 5.58038632 | 1.02113727 | 30.496107  |
| cg24960291 | 0.04724615 | 0.19103557 | 0.0372365  | 0.98007577 |
| cg15916160 | 0.04724859 | 3.68299477 | 1.01596281 | 13.3513258 |
| cg27057288 | 0.04724889 | 29778.9233 | 1.13328724 | 782488540  |
| cg26572856 | 0.04725065 | 644918.327 | 1.17629563 | 3.5358E+11 |
| cg10593028 | 0.04725171 | 10.5640343 | 1.02901693 | 108.451881 |
| cg13077262 | 0.04725746 | 4.19389721 | 1.0175095  | 17.2861029 |
| cg27339291 | 0.04726016 | 927.436778 | 1.08615333 | 791913.035 |
| cg09412882 | 0.04726262 | 8.27962928 | 1.02587356 | 66.8233042 |
| cg26359174 | 0.0472631  | 6.64E-06   | 5.09E-11   | 0.86584026 |
| cg12685200 | 0.04726576 | 30728564.3 | 1.2313437  | 7.6684E+14 |
| cg19873719 | 0.04726634 | 3343.98386 | 1.10288679 | 10139053.4 |
| cg04351402 | 0.04727436 | 27.155329  | 1.0405248  | 708.692275 |
| cg06983052 | 0.04728324 | 0.17484305 | 0.03121615 | 0.97930378 |
| cg12897782 | 0.04728518 | 448.215036 | 1.07590806 | 186722.942 |
| cg19379572 | 0.04728603 | 317.494109 | 1.07144777 | 94080.656  |
| cg11979743 | 0.04728704 | 36.2950819 | 1.04395096 | 1261.87247 |
| cg00877620 | 0.04728851 | 3399126.76 | 1.19722034 | 9.6507E+12 |
| cg19326232 | 0.04729155 | 5.2057E+18 | 1.67403218 | 1.62E+37   |
| cg02129266 | 0.04729387 | 11281.8137 | 1.11790796 | 113854919  |
| cg07126792 | 0.047294   | 12636716.6 | 1.21569722 | 1.3135E+14 |
| cg13773678 | 0.04730638 | 28.4979967 | 1.04063074 | 780.426513 |
| cg27459530 | 0.04731024 | 18.9768298 | 1.03555951 | 347.754106 |
| cg19101460 | 0.04731208 | 264604299  | 1.25870507 | 5.5625E+16 |
| cg00865356 | 0.04731974 | 199.888024 | 1.0646758  | 37528.0647 |
| cg01755729 | 0.04732499 | 923083.911 | 1.17605194 | 7.2453E+11 |
| cg04825775 | 0.04734886 | 65102.2053 | 1.13845874 | 3722837718 |
| cg01508908 | 0.04734937 | 1.07E-05   | 1.30E-10   | 0.87467342 |

|            |            |            |            |            |
|------------|------------|------------|------------|------------|
| cg25418309 | 0.04735647 | 1739866078 | 1.28173013 | 2.3618E+18 |
| cg06726167 | 0.04735765 | 0.00010656 | 1.26E-08   | 0.89883538 |
| cg02497559 | 0.04735951 | 4.80043149 | 1.01844676 | 22.6267522 |
| cg24853978 | 0.0473621  | 675972.057 | 1.16913176 | 3.9084E+11 |
| cg05741490 | 0.04736345 | 7.04872594 | 1.0229805  | 48.568411  |
| cg18668511 | 0.04736729 | 0.25941813 | 0.068361   | 0.98444673 |
| cg09673200 | 0.04737065 | 283.825212 | 1.06772936 | 75446.7887 |
| cg26438284 | 0.04737541 | 32.7086565 | 1.0412176  | 1027.50493 |
| cg09853936 | 0.04737746 | 0.11008308 | 0.01243169 | 0.97478944 |
| cg12446939 | 0.0473783  | 72.4172515 | 1.05078812 | 4990.78572 |
| cg14732337 | 0.04737941 | 9.93400868 | 1.02690442 | 96.0990395 |
| cg21112925 | 0.04738167 | 55905669.2 | 1.22887573 | 2.5433E+15 |
| cg17067942 | 0.04738274 | 8548.95454 | 1.11021611 | 65829186.7 |
| cg10828599 | 0.04738475 | 3.82028233 | 1.01558683 | 14.3705655 |
| cg25163015 | 0.04739477 | 953.4438   | 1.08204748 | 840124.948 |
| cg00777209 | 0.04740486 | 1.5463E+12 | 1.37900036 | 1.73E+24   |
| cg25124300 | 0.04740761 | 0.21246547 | 0.04594845 | 0.9824396  |
| cg13580783 | 0.04741003 | 9.08072096 | 1.02552945 | 80.4067529 |
| cg10043760 | 0.04741602 | 4611.94517 | 1.10095153 | 19319686.4 |
| cg14844588 | 0.04741763 | 8.13588539 | 1.02416999 | 64.6305122 |
| cg16496965 | 0.04742469 | 141224663  | 1.23763844 | 1.6115E+16 |
| cg23421262 | 0.04742515 | 8.83928119 | 1.0250631  | 76.2225193 |
| cg13709054 | 0.04742714 | 679.872626 | 1.07683502 | 429245.685 |
| cg10426076 | 0.04742957 | 0.12044457 | 0.01485928 | 0.97628481 |
| cg14395298 | 0.04743058 | 3.22523541 | 1.01336187 | 10.2649841 |
| cg04004578 | 0.04743486 | 14952660.5 | 1.20556019 | 1.8546E+14 |
| cg14029489 | 0.04743937 | 2.87546459 | 1.0120023  | 8.17023501 |
| cg06191536 | 0.04744618 | 4.86588409 | 1.0179846  | 23.2585327 |
| cg26953749 | 0.04744693 | 10.486201  | 1.02682005 | 107.088298 |
| cg15670863 | 0.04744927 | 68.982843  | 1.04879104 | 4537.25522 |

|            |            |            |            |            |
|------------|------------|------------|------------|------------|
| cg02119043 | 0.04745105 | 243932.48  | 1.14966978 | 5.1757E+10 |
| cg02795515 | 0.04745233 | 4.48864673 | 1.01701771 | 19.8108147 |
| cg07516307 | 0.04745326 | 4.30333104 | 1.01652974 | 18.2175271 |
| cg26484001 | 0.04745379 | 7.48035121 | 1.02285832 | 54.7051858 |
| cg21417843 | 0.04745554 | 1.6441E+11 | 1.33624041 | 2.02E+22   |
| cg17758623 | 0.04745702 | 41446074   | 1.21743687 | 1.411E+15  |
| cg23631538 | 0.0474696  | 4.80954905 | 1.01768409 | 22.7298061 |
| cg01434121 | 0.04746984 | 906704379  | 1.25882406 | 6.5308E+17 |
| cg26066361 | 0.04747368 | 4.16266358 | 1.01601838 | 17.0545813 |
| cg05282518 | 0.04748603 | 0.20564318 | 0.04303727 | 0.98261626 |
| cg06223477 | 0.04749727 | 37087317   | 1.21212309 | 1.1348E+15 |
| cg09728459 | 0.04750156 | 3247159.36 | 1.17963461 | 8.9384E+12 |
| cg02011430 | 0.04750636 | 4.80799145 | 1.0174186  | 22.7210135 |
| cg00431427 | 0.04750678 | 0.05507265 | 0.00313124 | 0.9686262  |
| cg07930752 | 0.0475078  | 26.076137  | 1.03649114 | 656.025792 |
| cg22091798 | 0.04751031 | 29095969.4 | 1.20767464 | 7.01E+14   |
| cg27565406 | 0.04751216 | 10279.4714 | 1.10666617 | 95482753.7 |
| cg15074033 | 0.04751271 | 4.89496898 | 1.01757351 | 23.5469193 |
| cg10930027 | 0.04751913 | 11.3970467 | 1.02697914 | 126.480343 |
| cg05633748 | 0.04752129 | 22.0181788 | 1.03437374 | 468.689582 |
| cg12419678 | 0.04752333 | 84.7568946 | 1.04968433 | 6843.7062  |
| cg24791601 | 0.04752637 | 168149459  | 1.22949327 | 2.2997E+16 |
| cg02360776 | 0.04752806 | 264397.989 | 1.14579088 | 6.1011E+10 |
| cg09883798 | 0.04753822 | 0.24582927 | 0.06135952 | 0.98488428 |
| cg18149485 | 0.047542   | 6.55139033 | 1.02058157 | 42.055154  |
| cg13834500 | 0.0475524  | 3460396.86 | 1.1764419  | 1.0178E+13 |
| cg26855280 | 0.0475574  | 0.05383478 | 0.00299083 | 0.96902248 |
| cg10943458 | 0.04756079 | 3.46569905 | 1.01345685 | 11.8515849 |
| cg05485968 | 0.04756833 | 3103.70453 | 1.09002577 | 8837389.03 |
| cg17830174 | 0.04757156 | 3506143.51 | 1.17509657 | 1.0461E+13 |

|            |            |            |            |            |
|------------|------------|------------|------------|------------|
| cg05499148 | 0.04757585 | 12.1325771 | 1.02703404 | 143.32478  |
| cg18953784 | 0.04758319 | 3.6014674  | 1.01374615 | 12.7946896 |
| cg06976589 | 0.04759464 | 4.21338807 | 1.0153681  | 17.4839441 |
| cg04160503 | 0.04760315 | 225271.21  | 1.13908636 | 4.4551E+10 |
| cg05986933 | 0.04760656 | 6.12001967 | 1.01929736 | 36.7455488 |
| cg04726784 | 0.04761625 | 4.68885512 | 1.01636886 | 21.6312829 |
| cg27026926 | 0.04762177 | 2.30E-07   | 6.22E-14   | 0.85195004 |
| cg20768239 | 0.04762648 | 40.551358  | 1.03949681 | 1581.93139 |
| cg02537229 | 0.04763416 | 83679.9739 | 1.12546704 | 6221717570 |
| cg22068044 | 0.04763749 | 9298.08049 | 1.09982433 | 78607372.1 |
| cg16461538 | 0.04765975 | 6.55664477 | 1.01958457 | 42.1638303 |
| cg21124756 | 0.04766066 | 576023554  | 1.23117494 | 2.695E+17  |
| cg02952396 | 0.04766124 | 65441558.9 | 1.20381826 | 3.5575E+15 |
| cg18213440 | 0.04766245 | 21829635.6 | 1.19016378 | 4.0039E+14 |
| cg10096873 | 0.04766748 | 0.00337759 | 1.21E-05   | 0.94318109 |
| cg18848419 | 0.04766989 | 15.5707337 | 1.02859329 | 235.70808  |
| cg00435082 | 0.04767198 | 57433.0435 | 1.11899225 | 2947790287 |
| cg25543401 | 0.04767264 | 4017.64198 | 1.08884144 | 14824423.9 |
| cg27457323 | 0.04767757 | 167285262  | 1.21384868 | 2.3054E+16 |
| cg09951650 | 0.0476781  | 1078698.82 | 1.15273831 | 1.0094E+12 |
| cg00157359 | 0.04767998 | 5.33697808 | 1.01726912 | 27.999803  |
| cg16963127 | 0.04768365 | 17.2645516 | 1.02950496 | 289.522397 |
| cg20941820 | 0.04769229 | 3.21770826 | 1.01195536 | 10.2313272 |
| cg11126068 | 0.04769892 | 2455870.5  | 1.16089993 | 5.1954E+12 |
| cg12258454 | 0.04770282 | 7.32107378 | 1.02035559 | 52.5288651 |
| cg00393825 | 0.04770453 | 0.20625184 | 0.04322454 | 0.98415913 |
| cg06070625 | 0.0477073  | 6.34268131 | 1.01883741 | 39.4857959 |
| cg19590063 | 0.0477103  | 23.3871115 | 1.03231376 | 529.835992 |
| cg00159400 | 0.04771209 | 42603139.6 | 1.19374975 | 1.5204E+15 |
| cg19308132 | 0.0477205  | 7.99121681 | 1.02109368 | 62.5403404 |

|            |            |            |            |            |
|------------|------------|------------|------------|------------|
| cg23584647 | 0.04773668 | 8.14747644 | 1.02113804 | 65.0072466 |
| cg25975823 | 0.04773673 | 4627.55766 | 1.08779994 | 19685871.5 |
| cg14666397 | 0.04774213 | 4.52537178 | 1.01513103 | 20.1737402 |
| cg09427030 | 0.04774774 | 34974.6291 | 1.10939326 | 1102606917 |
| cg25729257 | 0.04774876 | 6080.92996 | 1.0902584  | 33916463.5 |
| cg13640145 | 0.04774877 | 4.78084162 | 1.01563884 | 22.5045022 |
| cg07042289 | 0.04775068 | 58.4467038 | 1.0411365  | 3281.04643 |
| cg10833037 | 0.04775648 | 8.48092569 | 1.02135432 | 70.4222808 |
| cg01085125 | 0.04775795 | 6.34532197 | 1.01841772 | 39.5349671 |
| cg08262764 | 0.04775937 | 69457.4148 | 1.11632793 | 4321608663 |
| cg10105971 | 0.04776065 | 4.88048696 | 1.01576154 | 23.4495519 |
| cg26477573 | 0.04776165 | 4.02742224 | 1.01383197 | 15.9988344 |
| cg03265268 | 0.04776706 | 0.24815233 | 0.06242961 | 0.98638414 |
| cg03045620 | 0.04777243 | 12.4130402 | 1.02502378 | 150.321943 |
| cg01208563 | 0.04777371 | 34774213.9 | 1.18565294 | 1.0199E+15 |
| cg27652925 | 0.04777545 | 6.68217607 | 1.01878756 | 43.828055  |
| cg20279561 | 0.04777788 | 3.08577613 | 1.01109079 | 9.4175661  |
| cg19405504 | 0.04777794 | 63.8237697 | 1.04149182 | 3911.19115 |
| cg19466590 | 0.04777956 | 154687537  | 1.20254493 | 1.9898E+16 |
| cg17031739 | 0.0477842  | 13.312174  | 1.02558844 | 172.792488 |
| cg05335186 | 0.0477886  | 11.3581542 | 1.02395195 | 125.989963 |
| cg23642078 | 0.04779077 | 41.8377499 | 1.0370024  | 1687.93951 |
| cg00901493 | 0.04779598 | 28.1173135 | 1.03291998 | 765.386801 |
| cg13616930 | 0.04779924 | 4.21753664 | 1.01404924 | 17.5411752 |
| cg26488040 | 0.04779962 | 79120.5021 | 1.11551004 | 5611831016 |
| cg12379294 | 0.04780441 | 7474459042 | 1.24589931 | 4.4841E+19 |
| cg06228599 | 0.04780511 | 5.4359871  | 1.01650208 | 29.0702362 |
| cg03470736 | 0.04782371 | 2.4216E+12 | 1.3143132  | 4.46E+24   |
| cg05214460 | 0.04783219 | 15.6058946 | 1.02657909 | 237.238366 |
| cg15526671 | 0.04783935 | 6.33485829 | 1.01772103 | 39.4316599 |

|            |            |            |            |            |
|------------|------------|------------|------------|------------|
| cg03547924 | 0.04784405 | 5.01131103 | 1.01541975 | 24.7318788 |
| cg21244038 | 0.0478473  | 6.92067947 | 1.01850821 | 47.0254473 |
| cg19813688 | 0.0478496  | 1.16E-07   | 1.58E-14   | 0.85968386 |
| cg15416643 | 0.04785399 | 4.54440005 | 1.01440946 | 20.3582208 |
| cg19189310 | 0.04785518 | 20185.1932 | 1.09814742 | 371026710  |
| cg17859426 | 0.04786409 | 11.6058898 | 1.0233251  | 131.626478 |
| cg15395329 | 0.04786492 | 6.18727244 | 1.01728205 | 37.6319824 |
| cg02367316 | 0.04787255 | 3.49183478 | 1.01178256 | 12.0509194 |
| cg12873037 | 0.04787259 | 190.661753 | 1.05041413 | 34607.2116 |
| cg26841483 | 0.04787556 | 0.15452627 | 0.02429915 | 0.98268339 |
| cg19139554 | 0.04787852 | 39374178.9 | 1.17746664 | 1.3167E+15 |
| cg27038197 | 0.04788241 | 1.64E-05   | 2.98E-10   | 0.90235992 |
| cg19448816 | 0.04788411 | 0.23181239 | 0.05447383 | 0.98647338 |
| cg05978527 | 0.04788591 | 53.3162473 | 1.03770581 | 2739.33344 |
| cg24548564 | 0.04788611 | 26.4155873 | 1.03094132 | 676.840898 |
| cg18341924 | 0.04789305 | 56782.8705 | 1.10688727 | 2912938347 |
| cg08971171 | 0.04789361 | 95.2751243 | 1.04316607 | 8701.72982 |
| cg23130254 | 0.04790449 | 7.04301137 | 1.01817235 | 48.7186764 |
| cg05319515 | 0.04790975 | 29.4450838 | 1.0316172  | 840.440586 |
| cg20346388 | 0.04791143 | 6.36625448 | 1.01716574 | 39.8452234 |
| cg23166970 | 0.04791912 | 92.8577699 | 1.04238204 | 8271.98195 |
| cg27648075 | 0.04792525 | 3.58153446 | 1.01172081 | 12.6787835 |
| cg10401367 | 0.0479285  | 114284367  | 1.18435646 | 1.1028E+16 |
| cg10770742 | 0.04793013 | 3.14591271 | 1.010498   | 9.79394993 |
| cg01201932 | 0.04793063 | 0.23872156 | 0.05773651 | 0.98703545 |
| cg19705910 | 0.04793209 | 4.14417006 | 1.01302624 | 16.9533075 |
| cg20939662 | 0.04793238 | 5.65728342 | 1.01589827 | 31.5039968 |
| cg00143729 | 0.0479373  | 5.07732466 | 1.01486267 | 25.4016888 |
| cg03973663 | 0.04793765 | 37.8142483 | 1.03352961 | 1383.52821 |
| cg06952384 | 0.04794008 | 28.1501345 | 1.03072694 | 768.806984 |



|            |            |            |            |            |
|------------|------------|------------|------------|------------|
| cg08502873 | 0.04794093 | 20522221.7 | 1.16487198 | 3.6155E+14 |
| cg03774988 | 0.04794518 | 12.5099793 | 1.02311592 | 152.963688 |
| cg10494773 | 0.04794937 | 0.00018539 | 3.71E-08   | 0.9253664  |
| cg19386159 | 0.04796093 | 146685.667 | 1.11267818 | 1.9338E+10 |
| cg10322124 | 0.04796649 | 3.58370291 | 1.01148999 | 12.6970377 |
| cg24413842 | 0.04797285 | 0.21738797 | 0.04790539 | 0.98647618 |
| cg08525207 | 0.04797806 | 0.00294278 | 9.12E-06   | 0.94945413 |
| cg02082342 | 0.04797816 | 6.66745575 | 1.01702641 | 43.7107295 |
| cg17385737 | 0.0479795  | 12625.6834 | 1.08760625 | 146567640  |
| cg10042437 | 0.04797959 | 66.293413  | 1.03799973 | 4233.92848 |
| cg11478273 | 0.04798216 | 339.495421 | 1.05311634 | 109443.882 |
| cg11802985 | 0.04798293 | 0.11672454 | 0.01388691 | 0.98111213 |
| cg20256097 | 0.04798433 | 3665.17963 | 1.07551965 | 12490280.1 |
| cg19599045 | 0.04798619 | 5.7468828  | 1.01561929 | 32.5187421 |
| cg13450057 | 0.04798864 | 32037.9412 | 1.09618848 | 936362403  |
| cg10684802 | 0.04798953 | 5.27407262 | 1.01482174 | 27.4095843 |
| cg12253828 | 0.0479922  | 83617.3337 | 1.10533916 | 6325532234 |
| cg13649519 | 0.04799985 | 32.1147707 | 1.03100972 | 1000.33829 |
| cg10056203 | 0.04800311 | 9.44315956 | 1.01992764 | 87.4309697 |
| cg23835812 | 0.04800395 | 2496.51056 | 1.07113239 | 5818669.16 |
| cg20885078 | 0.04801367 | 10.8200658 | 1.02103442 | 114.661975 |
| cg01704105 | 0.04802748 | 26.5248149 | 1.02886204 | 683.829101 |
| cg08847991 | 0.04802787 | 29399.9066 | 1.09339456 | 790523878  |
| cg18226096 | 0.04802926 | 16.5538614 | 1.02463754 | 267.441232 |
| cg03124974 | 0.04803069 | 29.8673354 | 1.02987261 | 866.182589 |
| cg03294496 | 0.04803781 | 5.85291299 | 1.01537279 | 33.737944  |
| cg05153861 | 0.04804251 | 17030814.9 | 1.15420787 | 2.513E+14  |
| cg14151259 | 0.04804677 | 4.57381877 | 1.01315209 | 20.6482504 |
| cg12006072 | 0.04804811 | 6.32815555 | 1.01597183 | 39.416007  |
| cg25150440 | 0.04805369 | 0.1830413  | 0.03399487 | 0.98556385 |

|            |            |            |            |            |
|------------|------------|------------|------------|------------|
| cg21483700 | 0.04805654 | 0.0717206  | 0.00526106 | 0.97772035 |
| cg01890417 | 0.04805835 | 4.56304919 | 1.01305253 | 20.5531474 |
| cg12059258 | 0.04805926 | 0.26174655 | 0.0692999  | 0.98861992 |
| cg27395450 | 0.04806817 | 1772446.4  | 1.13007941 | 2.78E+12   |
| cg08304059 | 0.04806975 | 5.39553673 | 1.01441741 | 28.6980648 |
| cg09139491 | 0.04807001 | 5.6304286  | 1.0147826  | 31.2399189 |
| cg07419575 | 0.04807683 | 11.8504803 | 1.02113891 | 137.526718 |
| cg01337047 | 0.04808518 | 6.26443117 | 1.01557708 | 38.6411811 |
| cg10277175 | 0.0480888  | 5.84690348 | 1.01495833 | 33.682447  |
| cg12707693 | 0.04809349 | 3.56955843 | 1.01072924 | 12.6064893 |
| cg26615130 | 0.04809454 | 34672542.2 | 1.1566537  | 1.0394E+15 |
| cg12154261 | 0.04809541 | 17.8139436 | 1.02442365 | 309.770852 |
| cg23547181 | 0.04809599 | 6058.72948 | 1.07567562 | 34125718.2 |
| cg12223253 | 0.04809773 | 0.01485106 | 0.00022846 | 0.96538552 |
| cg24573719 | 0.04809822 | 6.40829189 | 1.01566223 | 40.4329349 |
| cg03264884 | 0.04810096 | 1519.23386 | 1.06311237 | 2171051.33 |
| cg13726191 | 0.04810322 | 97.3816161 | 1.03894308 | 9127.71775 |
| cg03531100 | 0.04810806 | 0.19560315 | 0.0387837  | 0.98651225 |
| cg17016559 | 0.04810906 | 0.01721902 | 0.00030668 | 0.96677866 |
| cg16764147 | 0.04811077 | 0.14954161 | 0.02271863 | 0.98433262 |
| cg13177214 | 0.0481135  | 1.3985E+11 | 1.23734418 | 1.58E+22   |
| cg15621458 | 0.04811781 | 9.99650178 | 1.01924358 | 98.0433425 |
| cg10500167 | 0.04812443 | 0.14708793 | 0.02197969 | 0.98431154 |
| cg15734706 | 0.04812862 | 14222.0355 | 1.08189321 | 186955877  |
| cg15791348 | 0.04813072 | 2727563.47 | 1.12957538 | 6.5862E+12 |
| cg03790378 | 0.04813651 | 8.05642265 | 1.01724853 | 63.8053966 |
| cg09902913 | 0.04814853 | 0.00186598 | 3.66E-06   | 0.9501162  |
| cg00057324 | 0.04815299 | 128.432252 | 1.04023012 | 15856.9175 |
| cg12973168 | 0.04815352 | 547320926  | 1.1775058  | 2.544E+17  |
| cg22783598 | 0.04815462 | 110032.897 | 1.09879699 | 1.1019E+10 |

|            |            |            |            |            |
|------------|------------|------------|------------|------------|
| cg08941457 | 0.04815808 | 6.25689497 | 1.01496509 | 38.5715084 |
| cg19270251 | 0.04816169 | 18.7101739 | 1.02396345 | 341.87803  |
| cg12647587 | 0.04816931 | 0.08400469 | 0.00719892 | 0.9802562  |
| cg14352682 | 0.04818162 | 14.9099173 | 1.02184173 | 217.55388  |
| cg12192818 | 0.04818593 | 11.1853539 | 1.01944884 | 122.725277 |
| cg21477861 | 0.04818913 | 26.8971206 | 1.02656146 | 704.736269 |
| cg14573676 | 0.04819824 | 1252255.79 | 1.11766304 | 1.4031E+12 |
| cg15978899 | 0.04822943 | 6.99141652 | 1.01525378 | 48.1455038 |
| cg10746615 | 0.04824151 | 6606195.44 | 1.12908304 | 3.8652E+13 |
| cg07468655 | 0.04824158 | 0.14466695 | 0.02124368 | 0.985165   |
| cg08830818 | 0.0482418  | 32.0041301 | 1.02715278 | 997.18792  |
| cg23979631 | 0.04824321 | 3.63559424 | 1.01001929 | 13.0864288 |
| cg25160915 | 0.04824616 | 10.2719478 | 1.01812329 | 103.634709 |
| cg04638014 | 0.04825467 | 4.57672574 | 1.01173864 | 20.7033889 |
| cg01575614 | 0.04825839 | 51386202.3 | 1.14561108 | 2.3049E+15 |
| cg00365945 | 0.04826387 | 8.43439376 | 1.01640721 | 69.9906468 |
| cg13841742 | 0.04827313 | 31.3357401 | 1.0264945  | 956.584388 |
| cg23036508 | 0.04827451 | 957.376257 | 1.05344411 | 870069.223 |
| cg24740531 | 0.04827537 | 3.12428085 | 1.00867395 | 9.67719138 |
| cg27638778 | 0.04827596 | 2404.86912 | 1.06077661 | 5452039.01 |
| cg00953403 | 0.04829543 | 2.72E-06   | 8.13E-12   | 0.90844634 |
| cg01193217 | 0.04829571 | 5.56954261 | 1.01294774 | 30.6233024 |
| cg04940435 | 0.04830156 | 23.4974892 | 1.02384687 | 539.272051 |
| cg23531257 | 0.04830286 | 7.90177306 | 1.01553893 | 61.4826431 |
| cg17035770 | 0.04830297 | 9.90778561 | 1.01725309 | 96.4993046 |
| cg27253887 | 0.04830342 | 293698.749 | 1.09843463 | 7.8529E+10 |
| cg07954885 | 0.04831026 | 109.460677 | 1.03548788 | 11571.0092 |
| cg16740067 | 0.04831709 | 619.630583 | 1.04870187 | 366111.734 |
| cg14552404 | 0.04831969 | 0.16758342 | 0.02845713 | 0.98689495 |
| cg10397322 | 0.04833057 | 18.7796886 | 1.02175059 | 345.169075 |

|            |            |            |            |            |
|------------|------------|------------|------------|------------|
| cg15038286 | 0.04833466 | 5.65501118 | 1.01276078 | 31.5762142 |
| cg15648905 | 0.04833468 | 98027.8212 | 1.08775219 | 8834230666 |
| cg08460435 | 0.04833496 | 7.61276533 | 1.01496396 | 57.0997573 |
| cg27558095 | 0.0483547  | 3.48087015 | 1.00905873 | 12.0076826 |
| cg02205739 | 0.04835506 | 7.28375697 | 1.01445669 | 52.2970732 |
| cg16417118 | 0.04835519 | 10.7793189 | 1.01733379 | 114.213956 |
| cg15680518 | 0.04835819 | 508149.48  | 1.09942755 | 2.3486E+11 |
| cg05312338 | 0.0483587  | 2.8075E+10 | 1.18948041 | 6.63E+20   |
| cg15662902 | 0.04836476 | 14.8735731 | 1.01958748 | 216.973217 |
| cg23322523 | 0.04837178 | 3.88060791 | 1.0097487  | 14.9137283 |
| cg09937438 | 0.04837318 | 7.57338035 | 1.01457803 | 56.5319652 |
| cg08109136 | 0.04837699 | 35.5448313 | 1.02579203 | 1231.66781 |
| cg19554255 | 0.0483814  | 6.22475474 | 1.01308936 | 38.2469434 |
| cg18665732 | 0.0483838  | 1.0001E+11 | 1.19705816 | 8.36E+21   |
| cg21347053 | 0.04838545 | 2.79490092 | 1.0073179  | 7.75472288 |
| cg09914675 | 0.04838713 | 1.6957E+10 | 1.18165694 | 2.43E+20   |
| cg27476810 | 0.04839    | 4.41E-08   | 2.20E-15   | 0.88709556 |
| cg20439473 | 0.04839082 | 6.43666362 | 1.01325201 | 40.8887803 |
| cg04237075 | 0.04839154 | 169039.423 | 1.08879661 | 2.6244E+10 |
| cg00815931 | 0.04839364 | 6.77E-05   | 4.90E-09   | 0.93448492 |
| cg06445533 | 0.04840951 | 11074.0886 | 1.06723532 | 114909464  |
| cg11884792 | 0.04841926 | 3.10E-05   | 1.04E-09   | 0.93045075 |
| cg17333211 | 0.04842282 | 6.63086366 | 1.01319366 | 43.3958033 |
| cg12058064 | 0.04842759 | 6.70272781 | 1.01322872 | 44.3399987 |
| cg24815885 | 0.04843474 | 19008486.5 | 1.12214935 | 3.2199E+14 |
| cg02377114 | 0.04843508 | 1117.24379 | 1.04943303 | 1189436.25 |
| cg04630810 | 0.04843548 | 10176647   | 1.11727977 | 9.2693E+13 |
| cg22974452 | 0.04843797 | 31753099.1 | 1.12583693 | 8.9556E+14 |
| cg16216311 | 0.04844049 | 82.322306  | 1.03067681 | 6575.25423 |
| cg26518431 | 0.04844909 | 0.01028537 | 0.00010914 | 0.96929956 |

|            |            |            |            |            |
|------------|------------|------------|------------|------------|
| cg01376829 | 0.04845104 | 14.6759544 | 1.01844507 | 211.482822 |
| cg03948207 | 0.04845346 | 6744.20051 | 1.06172272 | 42840036.7 |
| cg06154570 | 0.04846293 | 36.6666171 | 1.02461584 | 1312.14135 |
| cg03126490 | 0.04846768 | 50267269.4 | 1.12676427 | 2.2425E+15 |
| cg24867946 | 0.04846769 | 659904.7   | 1.09437825 | 3.9792E+11 |
| cg02764093 | 0.04847238 | 5.53819126 | 1.01155092 | 30.3213232 |
| cg01761478 | 0.04847256 | 579.063626 | 1.04360156 | 321305.271 |
| cg27299725 | 0.04847372 | 43825949.3 | 1.1251956  | 1.707E+15  |
| cg09196146 | 0.04847448 | 5.86422366 | 1.01192264 | 33.9839408 |
| cg06568815 | 0.04847919 | 63.3639179 | 1.02810029 | 3905.24752 |
| cg08961621 | 0.04848069 | 6.71508575 | 1.01278876 | 44.5229829 |
| cg13509954 | 0.04848355 | 8374357573 | 1.16436693 | 6.023E+19  |
| cg23244095 | 0.0484846  | 17.2668405 | 1.01914145 | 292.544063 |
| cg18101225 | 0.04848671 | 11.0580118 | 1.01610037 | 120.342073 |
| cg01315067 | 0.04848852 | 4.75457444 | 1.01040364 | 22.3732152 |
| cg12453687 | 0.04848996 | 4.47880299 | 1.00999326 | 19.8611982 |
| cg23197992 | 0.04849615 | 66.6784853 | 1.02812691 | 4324.3887  |
| cg26406131 | 0.04850027 | 9453.71192 | 1.0621478  | 84143345   |
| cg21970438 | 0.04850455 | 0.19475235 | 0.0383382  | 0.98931294 |
| cg27262137 | 0.0485105  | 922694592  | 1.14456924 | 7.4383E+17 |
| cg20702204 | 0.04851137 | 0.00466963 | 2.26E-05   | 0.96552441 |
| cg03785807 | 0.04851682 | 396496.529 | 1.08758438 | 1.4455E+11 |
| cg25347337 | 0.04852017 | 64072677.5 | 1.12390972 | 3.6527E+15 |
| cg26763394 | 0.04852488 | 9.17040506 | 1.01445787 | 82.8978036 |
| cg06490744 | 0.04854595 | 14016.2177 | 1.06285629 | 184836238  |
| cg27022535 | 0.04855526 | 0.02706037 | 0.00074922 | 0.97736229 |
| cg14485377 | 0.04855753 | 7420.45507 | 1.05806696 | 52041274.7 |
| cg18332146 | 0.04855768 | 9751.62477 | 1.05989262 | 89720585   |
| cg10976961 | 0.04855893 | 5.7673629  | 1.01114834 | 32.8957419 |
| cg08575330 | 0.04855899 | 3.09677828 | 1.00717743 | 9.52169445 |

|            |            |            |            |            |
|------------|------------|------------|------------|------------|
| cg09863772 | 0.04856114 | 11.2796114 | 1.01542498 | 125.296931 |
| cg15945287 | 0.04856411 | 4.66808849 | 1.00976079 | 21.5804083 |
| cg10243292 | 0.04856434 | 81509.7789 | 1.07388307 | 6186748133 |
| cg03584535 | 0.04856633 | 5.64915871 | 1.01095865 | 31.5670617 |
| cg20259594 | 0.04857388 | 0.00117109 | 1.43E-06   | 0.95861844 |
| cg18773937 | 0.04857739 | 0.20520701 | 0.04252852 | 0.9901572  |
| cg04645421 | 0.04858054 | 4256560769 | 1.14817015 | 1.578E+19  |
| cg22898783 | 0.04858774 | 5.49944972 | 1.01062486 | 29.9259878 |
| cg05414026 | 0.04859078 | 179951.951 | 1.07773364 | 3.0047E+10 |
| cg08381596 | 0.04859084 | 2092.91697 | 1.04843929 | 4177925.7  |
| cg04400030 | 0.04859195 | 59453.0603 | 1.07031405 | 3302457229 |
| cg02970551 | 0.04859308 | 4.79410133 | 1.00972789 | 22.7619816 |
| cg01294194 | 0.04860796 | 0.05696374 | 0.00330218 | 0.98264307 |
| cg16044565 | 0.04861069 | 941722958  | 1.13430288 | 7.8184E+17 |
| cg03609847 | 0.04862121 | 4.9148E+11 | 1.17695501 | 2.05E+23   |
| cg16066354 | 0.04862393 | 7.57854873 | 1.01230855 | 56.7360621 |
| cg10800003 | 0.04864452 | 49740.8218 | 1.06645451 | 2319976466 |
| cg14610403 | 0.04864572 | 4.21984405 | 1.00859495 | 17.6553371 |
| cg02928278 | 0.04864717 | 0.21154505 | 0.04516596 | 0.99081936 |
| cg03330710 | 0.04865075 | 9.52339626 | 1.01343582 | 89.4926691 |
| cg07048608 | 0.04866145 | 0.28095341 | 0.07952573 | 0.99256952 |
| cg16819803 | 0.04866199 | 6.38781802 | 1.01094894 | 40.3622945 |
| cg00765921 | 0.04866976 | 0.00023904 | 6.00E-08   | 0.95248398 |
| cg07906941 | 0.04869388 | 1219527731 | 1.12739947 | 1.3192E+18 |
| cg06019229 | 0.04869748 | 727.890406 | 1.0383852  | 510238.824 |
| cg09661370 | 0.04870307 | 5.07986051 | 1.00929237 | 25.567401  |
| cg11811341 | 0.04870345 | 0.1528227  | 0.02360571 | 0.98936968 |
| cg19379845 | 0.04870634 | 2125.16716 | 1.04445117 | 4324123.12 |
| cg08616234 | 0.04870739 | 0.14948657 | 0.02258843 | 0.98927817 |
| cg10645113 | 0.04871146 | 45.2834394 | 1.02179223 | 2006.85602 |

|            |            |            |            |            |
|------------|------------|------------|------------|------------|
| cg21704448 | 0.04871204 | 6.62198224 | 1.01074067 | 43.3846682 |
| cg24814117 | 0.04872005 | 83.3866722 | 1.02515383 | 6782.7256  |
| cg06615912 | 0.04872422 | 115573.729 | 1.06743229 | 1.2513E+10 |
| cg00302587 | 0.04872621 | 4.01055182 | 1.00779278 | 15.960152  |
| cg15088822 | 0.0487276  | 1.1479E+10 | 1.13805233 | 1.16E+20   |
| cg04055835 | 0.0487342  | 8.32846299 | 1.01184155 | 68.5515395 |
| cg13727946 | 0.04873496 | 20.8497369 | 1.01700115 | 427.444481 |
| cg11948341 | 0.04874364 | 3693837.28 | 1.0869267  | 1.2553E+13 |
| cg22729335 | 0.04874436 | 23.0468518 | 1.01743446 | 522.055619 |
| cg08172935 | 0.04874944 | 2.447E+10  | 1.14024171 | 5.25E+20   |
| cg07681419 | 0.04874994 | 33349493.6 | 1.09966034 | 1.0114E+15 |
| cg12356261 | 0.04875144 | 17.0261349 | 1.01564883 | 285.422739 |
| cg17864619 | 0.04875682 | 7277.12728 | 1.04969404 | 50449540   |
| cg07097863 | 0.04875973 | 1038163.58 | 1.07828858 | 9.9953E+11 |
| cg20865068 | 0.04877867 | 1757126.72 | 1.08008235 | 2.8586E+12 |
| cg04446777 | 0.04878344 | 816105.81  | 1.07534587 | 6.1936E+11 |
| cg24348448 | 0.04878856 | 0.16111601 | 0.02621143 | 0.99034556 |
| cg13614659 | 0.04878988 | 1385.05416 | 1.03914326 | 1846112.19 |
| cg21205305 | 0.04879423 | 7.71082823 | 1.01086198 | 58.8179918 |
| cg20119464 | 0.04879675 | 5.44014204 | 1.00897971 | 29.3317548 |
| cg20277416 | 0.04879752 | 9.22817217 | 1.01179022 | 84.1668165 |
| cg02192204 | 0.04880004 | 5.70142739 | 1.00920409 | 32.2098124 |
| cg12207922 | 0.04880015 | 1.3034E+13 | 1.17225733 | 1.45E+26   |
| cg21080336 | 0.0488094  | 8.5276181  | 1.01125544 | 71.9108815 |
| cg24863255 | 0.04881205 | 4.43605676 | 1.00779249 | 19.52644   |
| cg19059861 | 0.04881224 | 0.17092784 | 0.02948644 | 0.99083944 |
| cg04324917 | 0.04882023 | 126.555612 | 1.02536389 | 15620.1356 |
| cg14602697 | 0.0488282  | 100.171997 | 1.02395851 | 9799.6442  |
| cg03288621 | 0.04882871 | 11300.3689 | 1.04910912 | 121720738  |
| cg06909469 | 0.04882927 | 5.24620862 | 1.00854686 | 27.2894655 |

|            |            |            |            |            |
|------------|------------|------------|------------|------------|
| cg20837456 | 0.04883209 | 0.00299835 | 9.26E-06   | 0.97068055 |
| cg16512615 | 0.0488457  | 3.56264677 | 1.00645218 | 12.611083  |
| cg17161421 | 0.0488461  | 4.58191166 | 1.0077322  | 20.8328309 |
| cg21237687 | 0.04884613 | 5.59736826 | 1.00875327 | 31.0586664 |
| cg16655905 | 0.04885042 | 7853083149 | 1.12171898 | 5.4979E+19 |
| cg00973653 | 0.04885352 | 4.25461075 | 1.00730665 | 17.9704091 |
| cg05350938 | 0.04885684 | 22438.058  | 1.05150564 | 478805276  |
| cg00679681 | 0.0488575  | 113531.853 | 1.06005143 | 1.2159E+10 |
| cg26234644 | 0.04886686 | 0.15709801 | 0.02490781 | 0.99084532 |
| cg15439862 | 0.04886892 | 5.4091861  | 1.00840782 | 29.0153387 |
| cg12567545 | 0.04887105 | 8.0227907  | 1.01036153 | 63.7050881 |
| cg11806528 | 0.04887122 | 4.5091822  | 1.00748266 | 20.1817113 |
| cg08260245 | 0.04887585 | 11.5593296 | 1.01213753 | 132.015756 |
| cg00482226 | 0.04888078 | 0.06489328 | 0.00426804 | 0.98666735 |
| cg10755961 | 0.0488849  | 16.5355143 | 1.01381187 | 269.698197 |
| cg00026374 | 0.04888551 | 141752.099 | 1.05967855 | 1.8962E+10 |
| cg17144305 | 0.04888735 | 5.00673047 | 1.00788937 | 24.8711325 |
| cg04087789 | 0.048888   | 11381.2244 | 1.04659104 | 123765888  |
| cg24543526 | 0.04889182 | 210958.737 | 1.061378   | 4.193E+10  |
| cg06759097 | 0.04889353 | 12.85446   | 1.01246609 | 163.202643 |
| cg18385671 | 0.04889395 | 236.806694 | 1.02686849 | 54610.1191 |
| cg08097581 | 0.04890117 | 13.9282185 | 1.0127704  | 191.54911  |
| cg21187597 | 0.04890345 | 5.09020843 | 1.00785441 | 25.7082983 |
| cg13711238 | 0.04890894 | 7.90640127 | 1.00993986 | 61.8959441 |
| cg01515913 | 0.04890958 | 4521513.7  | 1.07601163 | 1.9E+13    |
| cg08199563 | 0.04890964 | 0.11530491 | 0.01343323 | 0.98972654 |
| cg12914657 | 0.04893606 | 0.21256208 | 0.04551015 | 0.99280355 |
| cg00664406 | 0.04893872 | 9.47839673 | 1.01051827 | 88.9048791 |
| cg06928741 | 0.04893878 | 0.0017745  | 3.24E-06   | 0.97096216 |
| cg24028828 | 0.04894104 | 1745.03999 | 1.0352591  | 2941451.62 |



|            |            |            |            |            |
|------------|------------|------------|------------|------------|
| cg20643029 | 0.04894629 | 5.53101123 | 1.00793161 | 30.3513501 |
| cg17857094 | 0.04894739 | 0.09574091 | 0.00926609 | 0.98923289 |
| cg27083087 | 0.04895548 | 0.18898687 | 0.03598953 | 0.9924007  |
| cg05042697 | 0.04897297 | 0.06893995 | 0.00481028 | 0.98803251 |
| cg12303084 | 0.04897867 | 492.557087 | 1.02814146 | 235971.889 |
| cg20701850 | 0.04898418 | 626594.653 | 1.061231   | 3.6997E+11 |
| cg11253514 | 0.04898689 | 6.09695326 | 1.00805951 | 36.8756395 |
| cg18719665 | 0.04899329 | 6.07133985 | 1.00798949 | 36.569     |
| cg02310229 | 0.04899502 | 105.909252 | 1.02074907 | 10988.763  |
| cg03809994 | 0.04899872 | 2613.69282 | 1.03513257 | 6599531.64 |
| cg03446876 | 0.04900059 | 573.342916 | 1.02821043 | 319703.137 |
| cg02647878 | 0.04900063 | 3.75085466 | 1.00580694 | 13.987685  |
| cg16034458 | 0.04901172 | 24.382558  | 1.01392905 | 586.34195  |
| cg12434312 | 0.04901676 | 8.03693144 | 1.00902044 | 64.0148253 |
| cg00187606 | 0.04901761 | 1650.83297 | 1.03241145 | 2639693.23 |
| cg13547250 | 0.04902325 | 13005201.4 | 1.07263261 | 1.5768E+14 |
| cg10825332 | 0.0490242  | 3616696.88 | 1.06670541 | 1.2263E+13 |
| cg25538450 | 0.04902582 | 358.202039 | 1.02542453 | 125127.395 |
| cg13797775 | 0.04903888 | 1.9656E+12 | 1.12661357 | 3.43E+24   |
| cg11391462 | 0.04904338 | 0.14601367 | 0.02149264 | 0.99196721 |
| cg19189012 | 0.04904908 | 1.3838E+10 | 1.102187   | 1.74E+20   |
| cg10134204 | 0.04905341 | 4.73607568 | 1.00647137 | 22.2861907 |
| cg25228510 | 0.04906514 | 1655.42879 | 1.03082483 | 2658496.79 |
| cg09158314 | 0.04906765 | 10.6066565 | 1.00969345 | 111.421107 |
| cg03163184 | 0.04907502 | 4.58957297 | 1.00619444 | 20.9345026 |
| cg08584381 | 0.04908233 | 532711551  | 1.0841382  | 2.6176E+17 |
| cg27277403 | 0.04908308 | 2637.53137 | 1.03215179 | 6739872.76 |
| cg18238973 | 0.04908321 | 4.69227733 | 1.00622867 | 21.8811758 |
| cg23627301 | 0.04909457 | 15.6340581 | 1.01096577 | 241.772549 |
| cg15174949 | 0.04910284 | 2922002044 | 1.08943936 | 7.8371E+18 |

|            |            |            |            |            |
|------------|------------|------------|------------|------------|
| cg08495027 | 0.04910607 | 1291887.77 | 1.05665234 | 1.5795E+12 |
| cg14995433 | 0.0491066  | 61480.35   | 1.04409992 | 3620183612 |
| cg16548780 | 0.04910685 | 6.41360133 | 1.00729786 | 40.8362646 |
| cg21545902 | 0.04912903 | 4.31931301 | 1.00559752 | 18.5526163 |
| cg22160377 | 0.04912984 | 640.261092 | 1.02493582 | 399960.913 |
| cg06813260 | 0.04913356 | 5.81909303 | 1.00670635 | 33.6362671 |
| cg05597836 | 0.04913523 | 6.48121054 | 1.00710432 | 41.7097704 |
| cg22438763 | 0.04914304 | 4.39040754 | 1.00556853 | 19.1689356 |
| cg20770175 | 0.04914419 | 5.79868448 | 1.00661029 | 33.4039321 |
| cg11606466 | 0.04914464 | 0.00062271 | 3.99E-07   | 0.972724   |
| cg18353550 | 0.04914557 | 9.9512E+12 | 1.11851963 | 8.85E+25   |
| cg08371050 | 0.04915289 | 4.44309976 | 1.00554868 | 19.6322027 |
| cg25041172 | 0.0491556  | 2226283    | 1.05554209 | 4.6955E+12 |
| cg20412726 | 0.04916493 | 81999.7747 | 1.04224904 | 6451397662 |
| cg06852305 | 0.0491683  | 0.13596618 | 0.01862166 | 0.99275821 |
| cg17513943 | 0.04917131 | 279815976  | 1.07314057 | 7.2961E+16 |
| cg00658394 | 0.04917242 | 45.4711647 | 1.01393092 | 2039.21863 |
| cg25054416 | 0.04917276 | 9.95469364 | 1.00836049 | 98.274304  |
| cg22534097 | 0.04918291 | 0.23989809 | 0.05784583 | 0.99490476 |
| cg02931001 | 0.04918415 | 8.62214673 | 1.0077269  | 73.7713904 |
| cg01985396 | 0.0491845  | 7.65430725 | 1.00729519 | 58.1641012 |
| cg00220769 | 0.0491953  | 6000.91372 | 1.03113166 | 34923731.8 |
| cg14856679 | 0.0492128  | 6.37761337 | 1.00640707 | 40.4150106 |
| cg16170919 | 0.04921417 | 0.18321945 | 0.03376598 | 0.99417736 |
| cg13296916 | 0.04921679 | 8.96E-07   | 8.42E-13   | 0.95336418 |
| cg21233517 | 0.04921891 | 38.5007215 | 1.01256421 | 1463.91265 |
| cg13394083 | 0.04924005 | 1077976.32 | 1.04730345 | 1.1095E+12 |
| cg03836184 | 0.04924014 | 4.61781543 | 1.00510296 | 21.2159552 |
| cg27613455 | 0.0492405  | 51.1875143 | 1.01317292 | 2586.0952  |
| cg23629792 | 0.04924256 | 51.7323226 | 1.01317239 | 2641.43913 |

|            |            |            |            |            |
|------------|------------|------------|------------|------------|
| cg16925970 | 0.04924871 | 144323.754 | 1.03984991 | 2.0031E+10 |
| cg06959340 | 0.04925136 | 2105.0538  | 1.02539821 | 4321493.31 |
| cg22093805 | 0.04925424 | 44.3136002 | 1.01245555 | 1939.53715 |
| cg08391287 | 0.04925546 | 5991714790 | 1.07614633 | 3.336E+19  |
| cg00590039 | 0.0492567  | 4.48635116 | 1.00489669 | 20.0292697 |
| cg23923856 | 0.04925938 | 3.55934326 | 1.00412502 | 12.6168795 |
| cg20944895 | 0.04926978 | 5.327E+12  | 1.09820595 | 2.58E+25   |
| cg01629435 | 0.04927074 | 4.83377111 | 1.00504295 | 23.2481042 |
| cg20106260 | 0.04927176 | 179.400626 | 1.01668263 | 31656.4712 |
| cg06191810 | 0.04927376 | 8.76459093 | 1.00692528 | 76.2897268 |
| cg11686214 | 0.04927891 | 12564273.3 | 1.05295457 | 1.4992E+14 |
| cg15714196 | 0.04927892 | 2409565.2  | 1.04747953 | 5.5428E+12 |
| cg23548719 | 0.04928718 | 31365987.9 | 1.0553382  | 9.3224E+14 |
| cg01316923 | 0.0493005  | 36.1835734 | 1.0110486  | 1294.94366 |
| cg21380181 | 0.04931411 | 0.04882919 | 0.002406   | 0.9909762  |
| cg03874868 | 0.04931454 | 0.00191193 | 3.72E-06   | 0.98139472 |
| cg27203983 | 0.04931603 | 0.13975279 | 0.01964624 | 0.99412602 |
| cg17366544 | 0.04932908 | 5.58075022 | 1.0050615  | 30.9879275 |
| cg27492942 | 0.04933021 | 17.4105199 | 1.00841064 | 300.59798  |
| cg05964918 | 0.04933089 | 99.2788632 | 1.01355625 | 9724.46535 |
| cg00937681 | 0.04933508 | 24.5256709 | 1.00935508 | 595.93353  |
| cg09133836 | 0.04934304 | 0.01934906 | 0.00037866 | 0.98872119 |
| cg13611499 | 0.04935256 | 9087.77237 | 1.02616206 | 80482030.9 |
| cg06126494 | 0.04935392 | 6.84859236 | 1.00545498 | 46.6487492 |
| cg10208370 | 0.04935836 | 4.61321681 | 1.00430244 | 21.190598  |
| cg15793258 | 0.04935954 | 5.53505081 | 1.00480738 | 30.4902093 |
| cg10888878 | 0.04936573 | 15.88971   | 1.00770604 | 250.552118 |
| cg14558880 | 0.0493748  | 3.55012546 | 1.00347228 | 12.5597797 |
| cg05457264 | 0.04938322 | 3.3425E+10 | 1.06758766 | 1.05E+21   |
| cg21910650 | 0.04938383 | 6.83249707 | 1.00519475 | 46.4417627 |

|            |            |            |            |            |
|------------|------------|------------|------------|------------|
| cg11933779 | 0.04938685 | 4.61747352 | 1.004113   | 21.2337274 |
| cg19725972 | 0.04938771 | 9.62270556 | 1.00608455 | 92.0364619 |
| cg01682784 | 0.04938799 | 0.17948519 | 0.03236346 | 0.9954107  |
| cg13934277 | 0.0493884  | 113443.366 | 1.03163858 | 1.2475E+10 |
| cg02396253 | 0.049397   | 23.7982812 | 1.00839792 | 561.64157  |
| cg03278924 | 0.04940589 | 234710510  | 1.0513777  | 5.2397E+16 |
| cg01077764 | 0.04940667 | 12.0781371 | 1.00648873 | 144.940912 |
| cg05647602 | 0.04940838 | 19.4489534 | 1.00771182 | 375.367025 |
| cg12718426 | 0.04942412 | 347645.146 | 1.03266862 | 1.1703E+11 |
| cg17216414 | 0.04942454 | 3880.92605 | 1.02102369 | 14751456.9 |
| cg00619097 | 0.04942619 | 35846.1151 | 1.02667663 | 1251556653 |
| cg04857420 | 0.04942737 | 3.81490759 | 1.00335996 | 14.5047844 |
| cg21149807 | 0.04943044 | 436454202  | 1.05082178 | 1.8128E+17 |
| cg17300047 | 0.04943637 | 0.08974131 | 0.00810152 | 0.994073   |
| cg02084087 | 0.04944043 | 4.4628422  | 1.00366841 | 19.8441639 |
| cg06512974 | 0.04944452 | 8.72635576 | 1.00527821 | 75.7494634 |
| cg16856286 | 0.04944906 | 0.31183384 | 0.09751383 | 0.99719542 |
| cg09408143 | 0.04945315 | 0.12097314 | 0.01470863 | 0.99495989 |
| cg14677130 | 0.04945361 | 13.2421401 | 1.00619397 | 174.274821 |
| cg01817464 | 0.04945584 | 768403.889 | 1.03278583 | 5.717E+11  |
| cg07279963 | 0.04945836 | 9.42E-05   | 9.07E-09   | 0.97827462 |
| cg10104451 | 0.0494585  | 11.8470268 | 1.00587301 | 139.532569 |
| cg10277546 | 0.04945931 | 356240443  | 1.04767534 | 1.2113E+17 |
| cg10094907 | 0.04946101 | 124.200352 | 1.01143373 | 15251.3476 |
| cg05922057 | 0.04946969 | 190.170484 | 1.01224818 | 35727.2196 |
| cg10911971 | 0.04947252 | 1186397302 | 1.04939072 | 1.3413E+18 |
| cg18476690 | 0.04947639 | 8.64597472 | 1.00495275 | 74.3844714 |
| cg11721566 | 0.0494806  | 0.07063985 | 0.00502012 | 0.99399718 |
| cg10010922 | 0.04948806 | 774935164  | 1.04689864 | 5.7362E+17 |
| cg14240963 | 0.04949117 | 253355.418 | 1.02807861 | 6.2436E+10 |

|            |            |            |            |            |
|------------|------------|------------|------------|------------|
| cg24860534 | 0.04949591 | 8.21319339 | 1.00465354 | 67.1440883 |
| cg02376018 | 0.04950151 | 54.1048388 | 1.00873915 | 2901.97281 |
| cg08230472 | 0.04950541 | 1602.08859 | 1.01609028 | 2526043.12 |
| cg23151421 | 0.04950705 | 12.9245181 | 1.00553264 | 166.124064 |
| cg16961218 | 0.04950743 | 1097299.86 | 1.03041626 | 1.1685E+12 |
| cg27616378 | 0.04950947 | 5060.59445 | 1.01846662 | 25145268.2 |
| cg22981993 | 0.04951192 | 5.21512978 | 1.00353168 | 27.1018636 |
| cg06051154 | 0.04951434 | 126273.855 | 1.02526318 | 1.5552E+10 |
| cg14513281 | 0.04952128 | 2514.53061 | 1.01652782 | 6220060.16 |
| cg07886701 | 0.04952158 | 4.65287202 | 1.00322202 | 21.5796878 |
| cg11904960 | 0.04952355 | 1.3245E+11 | 1.054811   | 1.66E+22   |
| cg08196359 | 0.04952866 | 4.48E-05   | 2.05E-09   | 0.97956966 |
| cg03478969 | 0.04953713 | 5.23697576 | 1.00335714 | 27.3341505 |
| cg14878320 | 0.04954031 | 1.927E+12  | 1.0585108  | 3.51E+24   |
| cg02512505 | 0.04954306 | 3.69677123 | 1.00261597 | 13.6304606 |
| cg20271517 | 0.04954381 | 3.8731005  | 1.00270482 | 14.9604421 |
| cg01966878 | 0.04955117 | 5.351166   | 1.0032974  | 28.5408669 |
| cg18180874 | 0.04955733 | 59096860   | 1.03524469 | 3.3735E+15 |
| cg08655788 | 0.0495644  | 20.3866905 | 1.00575893 | 413.237347 |
| cg25020279 | 0.04956583 | 4600137120 | 1.04314328 | 2.0286E+19 |
| cg03428881 | 0.04956642 | 11672596   | 1.03133169 | 1.3211E+14 |
| cg25207721 | 0.04956664 | 320973.421 | 1.02431655 | 1.0058E+11 |
| cg17971306 | 0.04956882 | 126989.332 | 1.02240363 | 1.5773E+10 |
| cg05058516 | 0.0495711  | 2.32E-09   | 5.59E-18   | 0.96340122 |
| cg00378234 | 0.04957445 | 0.2103351  | 0.04436938 | 0.99710331 |
| cg16822666 | 0.04958121 | 4.68371571 | 1.00283133 | 21.8752567 |
| cg27221266 | 0.04958258 | 46709.4964 | 1.01981659 | 2139381802 |
| cg16673929 | 0.04958564 | 5.97893315 | 1.00324497 | 35.6320169 |
| cg01940235 | 0.04958836 | 7.17E-06   | 5.25E-11   | 0.97890687 |
| cg26427777 | 0.04959139 | 83.8366244 | 1.00794345 | 6973.18845 |

|            |            |            |            |            |
|------------|------------|------------|------------|------------|
| cg11725331 | 0.0495938  | 1794.065   | 1.01339462 | 3176126.22 |
| cg16918905 | 0.04959383 | 3.26177855 | 1.00210167 | 10.6168862 |
| cg11865553 | 0.04959667 | 4.47539643 | 1.00264608 | 19.9763143 |
| cg01144344 | 0.04960064 | 43.9498423 | 1.00662704 | 1918.87219 |
| cg16995385 | 0.04960462 | 5126.67825 | 1.01487535 | 25897594   |
| cg14753321 | 0.0496119  | 4.05881689 | 1.00237969 | 16.4348845 |
| cg08939418 | 0.04961215 | 0.27941321 | 0.07824072 | 0.99784034 |
| cg24680852 | 0.04961454 | 9.9836E+10 | 1.04360177 | 9.55E+21   |
| cg13676449 | 0.04963104 | 9.13787506 | 1.00357472 | 83.2033317 |
| cg21573692 | 0.0496318  | 7.2193E+10 | 1.04106311 | 5.01E+21   |
| cg08517562 | 0.04963193 | 7927307361 | 1.0373548  | 6.0579E+19 |
| cg11547878 | 0.0496378  | 98.1748927 | 1.00728846 | 9568.56942 |
| cg04871873 | 0.04964387 | 5187881    | 1.02436183 | 2.6274E+13 |
| cg17789012 | 0.04965005 | 28142.989  | 1.015795   | 779712278  |
| cg25922808 | 0.04965246 | 977.147246 | 1.01051346 | 944882.753 |
| cg02602601 | 0.04966354 | 319251.142 | 1.01881285 | 1.0004E+11 |
| cg01565314 | 0.04967054 | 4.9593516  | 1.00230844 | 24.5385226 |
| cg24198953 | 0.04967377 | 1.4388E+11 | 1.03731217 | 2.00E+22   |
| cg21589375 | 0.0496785  | 0.14700389 | 0.02166844 | 0.99730956 |
| cg13067194 | 0.0496876  | 46296.198  | 1.01477536 | 2112130471 |
| cg01185682 | 0.04968992 | 4.07474807 | 1.00190557 | 16.5719928 |
| cg13447915 | 0.04969165 | 435.277993 | 1.00822143 | 187921.944 |
| cg08133669 | 0.04969321 | 19.8468621 | 1.00401431 | 392.32303  |
| cg25342397 | 0.04969525 | 173.162011 | 1.00688817 | 29779.9528 |
| cg13115617 | 0.04970402 | 7.2768E+12 | 1.03905059 | 5.10E+25   |
| cg09284708 | 0.04970641 | 6.07046402 | 1.00231646 | 36.7653678 |
| cg08704217 | 0.04970692 | 89297.3458 | 1.01470748 | 7858438113 |
| cg00013441 | 0.04970924 | 105.776028 | 1.00594046 | 11122.4953 |
| cg15551144 | 0.04971169 | 1056552844 | 1.02652483 | 1.0875E+18 |
| cg18870532 | 0.04971596 | 225.469898 | 1.00674794 | 50495.9309 |

|            |            |            |            |            |
|------------|------------|------------|------------|------------|
| cg02284939 | 0.04971663 | 54.2397935 | 1.00495735 | 2927.44283 |
| cg24493649 | 0.0497233  | 4.9519294  | 1.00193618 | 24.4742184 |
| cg27141863 | 0.04972669 | 14593135.6 | 1.01989635 | 2.0881E+14 |
| cg16519772 | 0.04973135 | 17.6239773 | 1.00337393 | 309.560142 |
| cg25715035 | 0.04973303 | 14.6127879 | 1.00313342 | 212.866571 |
| cg05815275 | 0.04974168 | 6.77731981 | 1.00216222 | 45.832963  |
| cg00441434 | 0.0497418  | 10.8837068 | 1.00269692 | 118.13647  |
| cg10177147 | 0.04975109 | 7.24E-11   | 5.37E-21   | 0.97492618 |
| cg16292132 | 0.04975286 | 4.71862231 | 1.00167676 | 22.2281253 |
| cg24101459 | 0.04975767 | 0.17121673 | 0.02937    | 0.99813315 |
| cg17978274 | 0.04975854 | 0.24978375 | 0.06248329 | 0.99853766 |
| cg26213561 | 0.04976904 | 114173544  | 1.01889756 | 1.2794E+16 |
| cg03824617 | 0.04976922 | 13.5614561 | 1.00263219 | 183.430266 |
| cg13073564 | 0.04977025 | 15.0313944 | 1.0027241  | 225.328997 |
| cg26130726 | 0.04977132 | 0.00271452 | 7.41E-06   | 0.99411373 |
| cg02988727 | 0.04977494 | 6.13388465 | 1.00178509 | 37.5574975 |
| cg19877419 | 0.04978207 | 12.3905059 | 1.00239916 | 153.157187 |
| cg09382800 | 0.0497849  | 42.7261029 | 1.00353457 | 1819.09017 |
| cg09164920 | 0.04978917 | 19245369.2 | 1.01556827 | 3.6471E+14 |
| cg03087937 | 0.04979452 | 4.62045037 | 1.0013748  | 21.319252  |
| cg01241758 | 0.04979591 | 2.036E+12  | 1.02559031 | 4.04E+24   |
| cg04222409 | 0.0497978  | 154269.687 | 1.01060807 | 2.3549E+10 |
| cg05382097 | 0.04980246 | 5.0982971  | 1.00140664 | 25.9561223 |
| cg01973862 | 0.04980444 | 74815.1479 | 1.00963331 | 5543900240 |
| cg24212855 | 0.04981383 | 6.94E-06   | 4.87E-11   | 0.99038733 |
| cg01477546 | 0.049818   | 0.01245479 | 0.00015566 | 0.99651944 |
| cg26715571 | 0.04982493 | 5.01189139 | 1.00123335 | 25.0881128 |
| cg26147668 | 0.0498279  | 0.0001978  | 3.94E-08   | 0.99360963 |
| cg21810188 | 0.04982832 | 3.56383542 | 1.00095344 | 12.6888249 |
| cg18449964 | 0.04982895 | 6.11644503 | 1.00135392 | 37.3603171 |

|            |            |            |            |            |
|------------|------------|------------|------------|------------|
| cg00019495 | 0.04982995 | 40.7962447 | 1.00275832 | 1659.75545 |
| cg26104206 | 0.04983202 | 7.94853496 | 1.00152209 | 63.0831894 |
| cg17689707 | 0.0498321  | 3.28103935 | 1.00087174 | 10.7558429 |
| cg16131766 | 0.04984233 | 0.26648934 | 0.07108127 | 0.99908974 |
| cg16704246 | 0.04984368 | 4.96304723 | 1.00109435 | 24.6049115 |
| cg24603926 | 0.04984394 | 3.95326144 | 1.00093733 | 15.6136409 |
| cg24249542 | 0.04984934 | 8.17656117 | 1.00138359 | 66.763779  |
| cg27391511 | 0.04986    | 0.12430541 | 0.01547155 | 0.99872596 |
| cg17658213 | 0.04986249 | 23.7917326 | 1.0019052  | 564.970158 |
| cg16141056 | 0.04986922 | 5.28057252 | 1.00095087 | 27.8579568 |
| cg09988291 | 0.04987124 | 170.35199  | 1.00289333 | 28936.0788 |
| cg25212146 | 0.04987266 | 3266.73296 | 1.00450991 | 10623632.6 |
| cg21616089 | 0.04987338 | 5.95288673 | 1.0009869  | 35.4019224 |
| cg20541120 | 0.04987948 | 54.9276731 | 1.0021106  | 3010.69489 |
| cg03759613 | 0.04988523 | 27178928.8 | 1.0086164  | 7.3238E+14 |
| cg22816534 | 0.0498924  | 2586841.65 | 1.00696241 | 6.6455E+12 |
| cg00590620 | 0.04989605 | 6.68578189 | 1.00086282 | 44.6611451 |
| cg25983531 | 0.04989798 | 0.24060832 | 0.05792911 | 0.99936557 |
| cg08786829 | 0.04990157 | 5.11980253 | 1.00070216 | 26.1939856 |
| cg09268877 | 0.04990197 | 1.5691E+12 | 1.01209355 | 2.43E+24   |
| cg00856204 | 0.04990895 | 221.7282   | 1.00214973 | 49057.9333 |
| cg00711072 | 0.04991039 | 5.64470518 | 1.0006774  | 31.8411274 |
| cg14930269 | 0.049916   | 2968888.63 | 1.00548124 | 8.7662E+12 |
| cg18120358 | 0.04992927 | 0.23881957 | 0.05706002 | 0.99955786 |
| cg02915785 | 0.0499394  | 5.66417664 | 1.00045896 | 32.068179  |
| cg19955956 | 0.04994188 | 0.03097934 | 0.00096057 | 0.99911875 |
| cg00699945 | 0.04994358 | 4.13818664 | 1.00034989 | 17.118599  |
| cg16989018 | 0.04994929 | 0.07974336 | 0.00636257 | 0.99944023 |
| cg11905617 | 0.04995242 | 160149.757 | 1.00249258 | 2.5584E+10 |
| cg25589890 | 0.04996321 | 11.3216245 | 1.00038979 | 128.129239 |



|            |            |            |            |            |
|------------|------------|------------|------------|------------|
| cg05883932 | 0.04997607 | 211634975  | 1.00200481 | 4.47E+16   |
| cg10527285 | 0.04997786 | 2650443895 | 1.00209958 | 7.0101E+18 |
| cg12431087 | 0.0499867  | 5.52560683 | 1.00009921 | 30.5293019 |

---
