# Supplementary material for: Mining the Prognostic Role of DNA Methylation Heterogeneity in Lung Adenocarcinoma
Source: Hindawi journal article supplement (doi:10.1155/2022/9389372), 2022-05-28
Supplement: f8 [file 9389372.f8.pdf]

**Table S2**

| CpG        | Chrom | Start     | End       | GeneSymbol     | Feature_Type | Cluster |
|------------|-------|-----------|-----------|----------------|--------------|---------|
| cg04781638 | chr15 | 82572041  | 82572042  | CPEB1          | .            | C5      |
| cg08932256 | chr12 | 115570453 | 115570454 | RP11-1028N23.3 | .            | C2      |
| cg27274426 | chr2  | 86563964  | 86563965  | CHMP3          | S_Shore      | C4      |
| cg02721176 | chr10 | 116325075 | 116325076 | CCDC172        | .            | C4      |
| cg24874612 | chr17 | 4786470   | 4786471   | VMO1           | S_Shore      | C4      |
| cg24041078 | chr11 | 111513164 | 111513165 | BTG4           | Island       | C5      |
| cg09937190 | chr20 | 15196863  | 15196864  | MACROD2        | .            | C4      |
| cg12778476 | chr11 | 22337799  | 22337800  | SLC17A6        | N_Shelf      | C5      |
| cg26942121 | chr11 | 8810656   | 8810657   | ST5            | .            | C4      |
| cg21401879 | chr2  | 44934897  | 44934898  | RP11-89K21.1   | Island       | C1      |
| cg14273450 | chr2  | 26402066  | 26402067  | DRC1           | Island       | C5      |
| cg10879207 | chr12 | 66235616  | 66235617  | AC078889.1     | Island       | C5      |
| cg06289844 | chr6  | 125750392 | 125750393 | RP11-624M8.1   | S_Shore      | C5      |
| cg07139165 | chr11 | 133953230 | 133953231 | IGSF9B         | N_Shelf      | C4      |
| cg21211321 | chr11 | 133946347 | 133946348 | IGSF9B         | .            | C4      |
| cg01645998 | chr16 | 82011617  | 82011618  | SDR42E1        | Island       | C4      |
| cg02703870 | chr16 | 82011535  | 82011536  | SDR42E1        | Island       | C4      |
| cg04886060 | chr16 | 82011183  | 82011184  | SDR42E1        | N_Shore      | C4      |
| cg10147797 | chr16 | 82011473  | 82011474  | SDR42E1        | Island       | C4      |
| cg15242360 | chr6  | 39886754  | 39886755  | RP11-61I13.3   | .            | C4      |
| cg01250407 | chr7  | 117324748 | 117324749 | WNT2           | S_Shore      | C5      |
| cg17161421 | chr6  | 32152300  | 32152301  | PPT2           | S_Shore      | C1      |
| cg21037008 | chr6  | 32152162  | 32152163  | PPT2           | S_Shore      | C1      |
| cg07517893 | chr19 | 45385906  | 45385907  | PPP1R13L       | Island       | C1      |
| cg05031016 | chr14 | 24334947  | 24334948  | ADCY4          | Island       | C1      |
| cg07485357 | chr14 | 24334473  | 24334474  | ADCY4          | N_Shore      | C1      |
| cg12265829 | chr14 | 24334816  | 24334817  | ADCY4          | Island       | C1      |
| cg13631572 | chr14 | 24334697  | 24334698  | ADCY4          | Island       | C1      |
| cg14287235 | chr14 | 24335133  | 24335134  | ADCY4          | Island       | C1      |
| cg16215203 | chr14 | 24334711  | 24334712  | ADCY4          | Island       | C1      |
| cg16761581 | chr14 | 24334601  | 24334602  | ADCY4          | Island       | C1      |
| cg19646112 | chr14 | 24335136  | 24335137  | ADCY4          | Island       | C1      |
| cg23179456 | chr14 | 24334667  | 24334668  | ADCY4          | Island       | C1      |
| cg25556905 | chr14 | 24334719  | 24334720  | ADCY4          | Island       | C1      |
| cg20184247 | chr17 | 48594690  | 48594691  | HOXB-AS3       | S_Shore      | C1      |
| cg26279336 | chr17 | 48597076  | 48597077  | HOXB-AS3       | S_Shore      | C4      |
| cg01501819 | chr19 | 49072943  | 49072944  | KCNA7          | Island       | C5      |
| cg00987461 | chr12 | 104050228 | 104050229 | GLT8D2         | .            | C5      |
| cg14849798 | chr12 | 104050239 | 104050240 | GLT8D2         | .            | C5      |
| cg16721177 | chr12 | 104050233 | 104050234 | GLT8D2         | .            | C5      |
| cg02409878 | chr8  | 98948270  | 98948271  | OSR2           | Island       | C4      |
| cg02469095 | chr8  | 98948693  | 98948694  | OSR2           | Island       | C4      |
| cg26570179 | chr8  | 98948272  | 98948273  | OSR2           | Island       | C4      |
| cg20034091 | chr18 | 33578563  | 33578564  | ASXL3          | Island       | C5      |

|            |       |           |           |                |               |    |
|------------|-------|-----------|-----------|----------------|---------------|----|
| cg24880056 | chr18 | 33578270  | 33578271  | ASXL3          | S_Shore       | C5 |
| cg27109877 | chr18 | 33578585  | 33578586  | ASXL3          | Island        | C5 |
| cg00225623 | chr13 | 24271753  | 24271754  | SPATA13        | .             | C4 |
| cg04579966 | chr13 | 24272083  | 24272084  | SPATA13        | .             | C4 |
| cg00813746 | chr3  | 50238126  | 50238127  | XXcos-LUCA16.1 | Island        | C4 |
| cg05060704 | chr3  | 50238262  | 50238263  | XXcos-LUCA16.1 | S_Shore       | C4 |
| cg12996903 | chr3  | 50238143  | 50238144  | XXcos-LUCA16.1 | Island        | C4 |
| cg15726260 | chr6  | 30007123  | 30007124  | HLA-J          | Island        | C5 |
| cg11354594 | chr4  | 183905551 | 183905552 | STOX2          | Island        | C4 |
| cg27614319 | chr17 | 36722750  | 36722751  | CTD-3194G12.2  | .             | C4 |
| cg02535060 | chr10 | 132337186 | 132337187 | LRRC27         | .             | C4 |
| cg05951994 | chr10 | 132337256 | 132337257 | LRRC27         | .             | C4 |
| cg07119315 | chr10 | 132337063 | 132337064 | LRRC27         | .             | C4 |
| cg10530568 | chr10 | 132337002 | 132337003 | LRRC27         | .             | C4 |
| cg21370255 | chr10 | 132336985 | 132336986 | LRRC27         | .             | C4 |
| cg22586726 | chr10 | 132337038 | 132337039 | LRRC27         | .             | C4 |
| cg24214699 | chr10 | 132336947 | 132336948 | LRRC27         | .             | C4 |
| cg11279444 | chr1  | 52633381  | 52633382  | FAM159A        | Island        | C5 |
| cg18146843 | chr1  | 52633576  | 52633577  | FAM159A        | Island        | C5 |
| cg25074426 | chr14 | 88551432  | 88551433  | RP11-507K2.3   | Island        | C4 |
| cg08886727 | chr17 | 48723722  | 48723723  | PRAC2          | Island        | C5 |
| cg08886727 | chr17 | 48723722  | 48723723  | PRAC1          | Island        | C5 |
| cg10978355 | chr5  | 81233521  | 81233522  | CKMT2          | .             | C5 |
| cg12827530 | chr5  | 81233302  | 81233303  | CKMT2          | .             | C5 |
| cg20929545 | chr11 | 119087336 | 119087337 | HMBS           | S_Shelf       | C1 |
| cg22027897 | chr17 | 62808495  | 62808496  |                | Mar-10 Island | C5 |
| cg00700007 | chr6  | 27867585  | 27867586  | HIST1H1B       | Island        | C5 |
| cg18798248 | chr6  | 27867682  | 27867683  | HIST1H1B       | Island        | C5 |
| cg03929531 | chr15 | 52112965  | 52112966  | BCL2L10        | S_Shore       | C4 |
| cg15190747 | chr15 | 52112936  | 52112937  | BCL2L10        | S_Shore       | C4 |
| cg26631984 | chr2  | 17538108  | 17538109  | VSNL1          | N_Shore       | C5 |
| cg02000318 | chr7  | 27158094  | 27158095  | HOXA7          | N_Shore       | C1 |
| cg02384857 | chr7  | 27157995  | 27157996  | HOXA7          | N_Shore       | C1 |
| cg03232620 | chr7  | 27158260  | 27158261  | HOXA7          | N_Shore       | C1 |
| cg06911354 | chr7  | 27157836  | 27157837  | HOXA7          | N_Shore       | C1 |
| cg15372603 | chr7  | 27157620  | 27157621  | HOXA7          | S_Shore       | C1 |
| cg19147218 | chr7  | 27157936  | 27157937  | HOXA7          | N_Shore       | C1 |
| cg13694927 | chr7  | 27145093  | 27145094  | HOXA5          | Island        | C1 |
| cg06888121 | chr7  | 27129449  | 27129450  | HOXA4          | N_Shore       | C1 |
| cg14042889 | chr7  | 27129589  | 27129590  | HOXA4          | N_Shore       | C1 |
| cg05250768 | chr7  | 27169651  | 27169652  | HOXA9          | Island        | C4 |
| cg08964780 | chr7  | 27169844  | 27169845  | HOXA9          | Island        | C4 |
| cg24884519 | chr7  | 27170171  | 27170172  | HOXA9          | S_Shore       | C4 |
| cg25644556 | chr7  | 27169963  | 27169964  | HOXA9          | Island        | C4 |
| cg26259537 | chr7  | 27169628  | 27169629  | HOXA9          | Island        | C4 |
| cg23679724 | chr20 | 59006423  | 59006424  | CTSZ           | N_Shore       | C4 |

|            |       |           |           |                   |         |    |
|------------|-------|-----------|-----------|-------------------|---------|----|
| cg21819468 | chr1  | 13584074  | 13584075  | PDPN              | Island  | C5 |
| cg08781140 | chr17 | 75588536  | 75588537  | MYO15B            | Island  | C6 |
| cg22287064 | chr17 | 75587989  | 75587990  | MYO15B            | Island  | C6 |
| cg04796763 | chr14 | 21301017  | 21301018  | RPGRIP1           | Island  | C5 |
| cg05639912 | chr17 | 49993527  | 49993528  | DLX3              | Island  | C5 |
| cg05129081 | chr3  | 189631147 | 189631148 | TP63              | .       | C4 |
| cg18881978 | chr11 | 133900918 | 133900919 | MIR4697HG         | .       | C4 |
| cg23971226 | chr11 | 133900869 | 133900870 | MIR4697HG         | .       | C4 |
| cg21361094 | chr12 | 57628134  | 57628135  | B4GALNT1          | Island  | C4 |
| cg00415978 | chr4  | 118888770 | 118888771 | SYNPO2            | .       | C5 |
| cg02519806 | chr4  | 118888881 | 118888882 | SYNPO2            | .       | C5 |
| cg02819335 | chr4  | 118888937 | 118888938 | SYNPO2            | .       | C5 |
| cg05682719 | chr4  | 118888816 | 118888817 | SYNPO2            | .       | C5 |
| cg11566061 | chr4  | 118888911 | 118888912 | SYNPO2            | .       | C5 |
| cg24326232 | chr4  | 118888820 | 118888821 | SYNPO2            | .       | C5 |
| cg06080729 | chr16 | 3017625   | 3017626   | TNFRSF12A         | Island  | C4 |
| cg04528060 | chr4  | 56505702  | 56505703  | ARL9              | Island  | C5 |
| cg07800892 | chr19 | 37211233  | 37211234  | CTC-454I21.3      | .       | C2 |
| cg10879207 | chr12 | 66235616  | 66235617  | RBMS1P1           | Island  | C5 |
| cg20162652 | chr12 | 66235238  | 66235239  | RBMS1P1           | Island  | C5 |
| cg08718097 | chr1  | 23342299  | 23342300  | HNRNPR            | N_Shore | C1 |
| cg13338827 | chr7  | 87475616  | 87475617  | ABCB4             | Island  | C5 |
| cg13570585 | chr20 | 8132926   | 8132927   | PLCB1             | Island  | C4 |
| cg08101193 | chr11 | 6269721   | 6269722   | CCKBR             | N_Shore | C4 |
| cg10139651 | chr22 | 30822722  | 30822723  | OSBP2             | Island  | C5 |
| cg03506033 | chr11 | 75668819  | 75668820  | MAP6              | Island  | C5 |
| cg10684802 | chr11 | 75668446  | 75668447  | MAP6              | Island  | C5 |
| cg18935660 | chr11 | 75668822  | 75668823  | MAP6              | Island  | C5 |
| cg25074426 | chr14 | 88551432  | 88551433  | PTPN21            | Island  | C4 |
| cg13851466 | chr1  | 37754301  | 37754302  | EPHA10            | Island  | C5 |
| cg06917617 | chr1  | 207645473 | 207645474 | CD46P1            | Island  | C6 |
| cg23401796 | chr8  | 140238568 | 140238569 | TRAPPC9           | .       | C4 |
| cg24129356 | chr6  | 32952958  | 32952959  | XXbac-BPG181M17.5 | .       | C4 |
| cg20053110 | chr6  | 37650088  | 37650089  | MDGA1             | Island  | C5 |
| cg20601919 | chr2  | 218782108 | 218782109 | CYP27A1           | Island  | C5 |
| cg24389730 | chr17 | 48037249  | 48037250  | MIR152            | Island  | C5 |
| cg23275064 | chr2  | 3702389   | 3702390   | DCDC2C            | N_Shore | C4 |
| cg05085336 | chr3  | 73474578  | 73474579  | PDZRN3            | .       | C4 |
| cg01038149 | chr22 | 21014476  | 21014477  | P2RX6             | Island  | C5 |
| cg19789653 | chr22 | 21014348  | 21014349  | P2RX6             | Island  | C5 |
| cg21014483 | chr22 | 21014418  | 21014419  | P2RX6             | Island  | C5 |
| cg06997549 | chr12 | 2834997   | 2834998   | NRIP2             | .       | C4 |
| cg14826425 | chr7  | 27193218  | 27193219  | RP1-170O19.14     | Island  | C1 |
| cg15971010 | chr17 | 19533587  | 19533588  | SLC47A1           | Island  | C5 |
| cg02970696 | chr3  | 125357528 | 125357529 | ZNF148            | Island  | C4 |
| cg10794285 | chr18 | 31042058  | 31042059  | DSC3              | Island  | C7 |

|            |       |           |           |               |         |    |
|------------|-------|-----------|-----------|---------------|---------|----|
| cg14719951 | chr18 | 31042508  | 31042509  | DSC3          | Island  | C6 |
| cg06917617 | chr1  | 207645473 | 207645474 | CR1L          | Island  | C6 |
| cg13050390 | chr7  | 143958558 | 143958559 | OR2F1         | .       | C7 |
| cg01554060 | chr5  | 115602305 | 115602306 | AC010226.4    | Island  | C4 |
| cg08870042 | chr5  | 115602451 | 115602452 | AC010226.4    | Island  | C4 |
| cg18098750 | chr5  | 115601951 | 115601952 | AC010226.4    | Island  | C4 |
| cg20733436 | chr5  | 115602087 | 115602088 | AC010226.4    | Island  | C4 |
| cg22173752 | chr5  | 115602222 | 115602223 | AC010226.4    | Island  | C4 |
| cg00002719 | chr1  | 169427468 | 169427469 | CCDC181       | Island  | C1 |
| cg08104202 | chr1  | 169427474 | 169427475 | CCDC181       | Island  | C5 |
| cg25464921 | chr1  | 169460460 | 169460461 | CCDC181       | .       | C5 |
| cg01085803 | chr6  | 11233312  | 11233313  | NEDD9         | .       | C4 |
| cg26844213 | chr6  | 11233359  | 11233360  | NEDD9         | .       | C4 |
| cg15457058 | chr1  | 47416650  | 47416651  | FOX E3        | Island  | C5 |
| cg18815943 | chr1  | 47416642  | 47416643  | FOX E3        | Island  | C5 |
| cg19809499 | chr1  | 47416593  | 47416594  | FOX E3        | Island  | C5 |
| cg20034091 | chr18 | 33578563  | 33578564  | RP11-258B16.1 | Island  | C5 |
| cg24880056 | chr18 | 33578270  | 33578271  | RP11-258B16.1 | S_Shore | C5 |
| cg27109877 | chr18 | 33578585  | 33578586  | RP11-258B16.1 | Island  | C5 |
| cg26552774 | chr15 | 43800200  | 43800201  | RP11-296A16.1 | N_Shore | C4 |
| cg16713947 | chr12 | 6451523   | 6451524   | CD27-AS1      | .       | C4 |
| cg08081156 | chr8  | 100649748 | 100649749 | SNX31         | S_Shore | C5 |
| cg10715223 | chr8  | 100649560 | 100649561 | SNX31         | Island  | C5 |
| cg13277380 | chr8  | 100649793 | 100649794 | SNX31         | S_Shore | C5 |
| cg18582180 | chr8  | 100649763 | 100649764 | SNX31         | S_Shore | C5 |
| cg24903183 | chr8  | 100649690 | 100649691 | SNX31         | S_Shore | C5 |
| cg26440289 | chr8  | 100649693 | 100649694 | SNX31         | S_Shore | C5 |
| cg27043726 | chr8  | 100649539 | 100649540 | SNX31         | Island  | C5 |
| cg19595886 | chr7  | 57654679  | 57654680  | RP11-368M16.8 | .       | C2 |
| cg19595886 | chr7  | 57654679  | 57654680  | RP11-368M16.7 | .       | C2 |
| cg21746532 | chr15 | 24953646  | 24953647  | SNURF         | N_Shore | C4 |
| cg05945782 | chr17 | 2051692   | 2051693   | MIR212        | Island  | C5 |
| cg25479916 | chr6  | 27873614  | 27873615  | HIST1H4L      | S_Shore | C5 |
| cg26552774 | chr15 | 43800200  | 43800201  | SERINC4       | N_Shore | C4 |
| cg15642759 | chr10 | 70284048  | 70284049  | NPFFR1        | Island  | C5 |
| cg23609985 | chr1  | 119327716 | 119327717 | RP5-834N19.1  | Island  | C5 |
| cg05211836 | chr19 | 16888765  | 16888766  | F2RL3         | N_Shore | C4 |
| cg23599104 | chr1  | 109113698 | 109113699 | KIAA1324      | Island  | C5 |
| cg16131766 | chr15 | 23565133  | 23565134  | MKRN3         | .       | C4 |
| cg26286839 | chr5  | 80083132  | 80083133  | CTD-2201118.1 | .       | C7 |
| cg19224164 | chr4  | 2964657   | 2964658   | NOP14         | S_Shore | C4 |
| cg23609985 | chr1  | 119327716 | 119327717 | RP11-418J17.3 | Island  | C5 |
| cg06148736 | chr22 | 18998178  | 18998179  | DGCR5         | Island  | C4 |
| cg09619624 | chr22 | 18998119  | 18998120  | DGCR5         | Island  | C4 |
| cg16489547 | chr16 | 30586128  | 30586129  | ZNF785        | S_Shore | C4 |
| cg08729318 | chr12 | 29783906  | 29783907  | TMTC1         | Island  | C5 |

|            |       |           |           |              |         |    |
|------------|-------|-----------|-----------|--------------|---------|----|
| cg10512875 | chr12 | 29783241  | 29783242  | TMTC1        | Island  | C5 |
| cg01940297 | chr8  | 128048945 | 128048946 | MIR1207      | .       | C4 |
| cg22492271 | chr7  | 36919884  | 36919885  | MIR1200      | .       | C4 |
| cg10453019 | chr3  | 16174708  | 16174709  | GALNT15      | .       | C1 |
| cg18789887 | chr3  | 16174593  | 16174594  | GALNT15      | .       | C1 |
| cg23067317 | chr3  | 16174587  | 16174588  | GALNT15      | .       | C1 |
| cg04022379 | chr5  | 111073042 | 111073043 | TSLP         | Island  | C5 |
| cg24994173 | chr5  | 111073299 | 111073300 | TSLP         | Island  | C5 |
| cg04614997 | chr17 | 29006167  | 29006168  | SEZ6         | Island  | C5 |
| cg24041078 | chr11 | 111513164 | 111513165 | MIR34C       | Island  | C5 |
| cg25446604 | chr2  | 241932761 | 241932762 | LINC01237    | Island  | C4 |
| cg01527459 | chr10 | 80356815  | 80356816  | DYDC2        | Island  | C5 |
| cg01527459 | chr10 | 80356815  | 80356816  | DYDC1        | Island  | C5 |
| cg14240820 | chr17 | 74262676  | 74262677  | CTD-2514K5.4 | .       | C4 |
| cg03081691 | chr1  | 226000305 | 226000306 | SDE2         | S_Shore | C1 |
| cg04117530 | chr1  | 226000151 | 226000152 | SDE2         | S_Shore | C4 |
| cg01348086 | chr5  | 177358295 | 177358296 | RGS14        | .       | C4 |
| cg04466840 | chr5  | 177357718 | 177357719 | RGS14        | .       | C4 |
| cg25461508 | chr5  | 177357714 | 177357715 | RGS14        | .       | C4 |
| cg12351660 | chr10 | 73911035  | 73911036  | PLAU         | Island  | C5 |
| cg23599104 | chr1  | 109113698 | 109113699 | C1orf194     | Island  | C5 |
| cg14346208 | chr11 | 35526000  | 35526001  | PAMR1        | .       | C5 |
| cg24740531 | chr18 | 63318499  | 63318500  | BCL2         | Island  | C5 |
| cg06641593 | chr3  | 37992744  | 37992745  | VILL         | N_Shore | C4 |
| cg23585979 | chr4  | 74365460  | 74365461  | EREG         | .       | C5 |
| cg07182669 | chr6  | 2903301   | 2903302   | SERPINB9     | Island  | C5 |
| cg07844977 | chr6  | 2903465   | 2903466   | SERPINB9     | Island  | C5 |
| cg13722431 | chr6  | 2903299   | 2903300   | SERPINB9     | Island  | C5 |
| cg22336806 | chr6  | 2903470   | 2903471   | SERPINB9     | Island  | C5 |
| cg20470734 | chr12 | 129700471 | 129700472 | TMEM132D     | S_Shore | C4 |
| cg01597066 | chr19 | 48624249  | 48624250  | AC022154.7   | Island  | C4 |
| cg02583309 | chr19 | 48624070  | 48624071  | AC022154.7   | N_Shore | C4 |
| cg11376305 | chr19 | 48624253  | 48624254  | AC022154.7   | Island  | C4 |
| cg22325530 | chr12 | 110689541 | 110689542 | HVCN1        | Island  | C5 |
| cg14780632 | chr11 | 66049050  | 66049051  | GAL3ST3      | Island  | C1 |
| cg24960947 | chr11 | 66048992  | 66048993  | GAL3ST3      | Island  | C1 |
| cg25717844 | chr7  | 100168195 | 100168196 | GAL3ST4      | N_Shelf | C5 |
| cg10324701 | chr12 | 131493324 | 131493325 | RP11-897M7.1 | S_Shore | C4 |
| cg13997645 | chr11 | 15114929  | 15114930  | INSC         | Island  | C5 |
| cg07664976 | chr15 | 25099341  | 25099342  | SNORD116-26  | .       | C4 |
| cg16150571 | chr15 | 25089841  | 25089842  | SNORD116-22  | .       | C4 |
| cg18488946 | chr15 | 24985148  | 24985149  | SNORD64      | .       | C4 |
| cg26410550 | chr15 | 24984109  | 24984110  | SNORD64      | .       | C4 |
| cg10082589 | chr2  | 191848194 | 191848195 | SDPR         | .       | C4 |
| cg14022778 | chr1  | 15327105  | 15327106  | FHAD1        | .       | C4 |
| cg21576886 | chr1  | 158930298 | 158930299 | PYHIN1       | .       | C3 |

|            |       |           |           |               |         |    |
|------------|-------|-----------|-----------|---------------|---------|----|
| cg01910527 | chr17 | 74249439  | 74249440  | TTYH2         | .       | C4 |
| cg24101049 | chr14 | 51846919  | 51846920  | GNG2          | .       | C4 |
| cg00243313 | chr5  | 1883299   | 1883300   | CTD-2194D22.3 | Island  | C5 |
| cg00264591 | chr5  | 1883400   | 1883401   | CTD-2194D22.3 | Island  | C5 |
| cg07882671 | chr5  | 1882891   | 1882892   | CTD-2194D22.3 | Island  | C4 |
| cg24876960 | chr5  | 1883100   | 1883101   | CTD-2194D22.3 | Island  | C4 |
| cg12421755 | chr15 | 52788736  | 52788737  | ONECUT1       | Island  | C5 |
| cg01627847 | chr17 | 45262145  | 45262146  | SPATA32       | Island  | C4 |
| cg03048083 | chr17 | 45262130  | 45262131  | SPATA32       | Island  | C4 |
| cg04992638 | chr17 | 45261961  | 45261962  | SPATA32       | Island  | C4 |
| cg08124910 | chr17 | 45262148  | 45262149  | SPATA32       | Island  | C4 |
| cg08247376 | chr17 | 45261991  | 45261992  | SPATA32       | Island  | C4 |
| cg11933779 | chr17 | 45261673  | 45261674  | SPATA32       | N_Shore | C4 |
| cg13001868 | chr17 | 45261856  | 45261857  | SPATA32       | Island  | C4 |
| cg17222164 | chr17 | 45262109  | 45262110  | SPATA32       | Island  | C4 |
| cg19539667 | chr17 | 45262464  | 45262465  | SPATA32       | Island  | C4 |
| cg24542751 | chr17 | 45262222  | 45262223  | SPATA32       | Island  | C4 |
| cg26532627 | chr17 | 45262377  | 45262378  | SPATA32       | Island  | C4 |
| cg26742995 | chr17 | 45262227  | 45262228  | SPATA32       | Island  | C4 |
| cg09838956 | chr15 | 25080566  | 25080567  | SNHG14        | .       | C4 |
| cg26582085 | chr15 | 24980782  | 24980783  | SNHG14        | .       | C4 |
| cg25035631 | chr1  | 35120757  | 35120758  | EFCAB14P1     | Island  | C5 |
| cg24550644 | chr17 | 32519186  | 32519187  | RP11-466A19.7 | Island  | C4 |
| cg00531137 | chr16 | 57610020  | 57610021  | GPR56         | .       | C4 |
| cg08739433 | chr1  | 112509303 | 112509304 | WNT2B         | Island  | C5 |
| cg11806528 | chr1  | 112509355 | 112509356 | WNT2B         | Island  | C7 |
| cg13939859 | chr1  | 90717962  | 90717963  | BARHL2        | Island  | C4 |
| cg20311863 | chr1  | 90718569  | 90718570  | BARHL2        | Island  | C4 |
| cg08864344 | chr1  | 33307396  | 33307397  | RP11-415J8.3  | S_Shore | C1 |
| cg20384898 | chr6  | 1624876   | 1624877   | GMDS          | Island  | C1 |
| cg21347053 | chr6  | 1624743   | 1624744   | GMDS          | Island  | C1 |
| cg24079361 | chr13 | 44373903  | 44373904  | SERP2         | Island  | C5 |
| cg16410706 | chr1  | 212700621 | 212700622 | BATF3         | Island  | C5 |
| cg25479916 | chr6  | 27873614  | 27873615  | HIST1H3I      | S_Shore | C5 |
| cg22507887 | chr1  | 157925710 | 157925711 | RP11-451O13.1 | .       | C4 |
| cg24716879 | chr1  | 234970125 | 234970126 | RP11-443B7.1  | .       | C7 |
| cg06976589 | chr4  | 1310260   | 1310261   | MAEA          | S_Shore | C1 |
| cg06722639 | chr14 | 23155168  | 23155169  | SLC7A8        | .       | C4 |
| cg18701685 | chr14 | 23155154  | 23155155  | SLC7A8        | .       | C4 |
| cg26582085 | chr15 | 24980782  | 24980783  | SNORD107      | .       | C4 |
| cg04110544 | chr5  | 42424840  | 42424841  | GHR           | Island  | C5 |
| cg07229186 | chr16 | 56632663  | 56632664  | MT1M          | Island  | C5 |
| cg07602841 | chr16 | 56668232  | 56668233  | MT1G          | N_Shore | C5 |
| cg23039189 | chr11 | 7512797   | 7512798   | PPFIBP2       | N_Shore | C4 |
| cg19507527 | chr3  | 192727518 | 192727519 | FGF12         | .       | C4 |
| cg18488946 | chr15 | 24985148  | 24985149  | RP11-701H24.5 | .       | C4 |

|            |       |           |           |               |         |    |
|------------|-------|-----------|-----------|---------------|---------|----|
| cg26410550 | chr15 | 24984109  | 24984110  | RP11-701H24.5 | .       | C4 |
| cg01059295 | chr4  | 188631523 | 188631524 | RP11-756P10.1 | Island  | C4 |
| cg10810752 | chr1  | 47225488  | 47225489  | RP1-18D14.7   | Island  | C5 |
| cg22381196 | chr16 | 72007477  | 72007478  | DHODH         | N_Shore | C4 |
| cg05413277 | chr2  | 74414960  | 74414961  | AC005041.11   | Island  | C4 |
| cg01554060 | chr5  | 115602305 | 115602306 | TICAM2        | Island  | C4 |
| cg08870042 | chr5  | 115602451 | 115602452 | TICAM2        | Island  | C4 |
| cg18098750 | chr5  | 115601951 | 115601952 | TICAM2        | Island  | C4 |
| cg20733436 | chr5  | 115602087 | 115602088 | TICAM2        | Island  | C4 |
| cg22173752 | chr5  | 115602222 | 115602223 | TICAM2        | Island  | C4 |
| cg00994629 | chr14 | 22226652  | 22226653  | TRAV36DV7     | .       | C4 |
| cg00356183 | chr7  | 712196    | 712197    | PRKAR1B       | Island  | C1 |
| cg12441126 | chr7  | 712325    | 712326    | PRKAR1B       | Island  | C1 |
| cg27331241 | chr7  | 712193    | 712194    | PRKAR1B       | Island  | C1 |
| cg24129356 | chr6  | 32952958  | 32952959  | HLA-DMA       | .       | C4 |
| cg14159026 | chr6  | 105136676 | 105136677 | BVES-AS1      | Island  | C5 |
| cg08095637 | chr3  | 169812739 | 169812740 | LRRC34        | S_Shore | C4 |
| cg12358524 | chr3  | 169812679 | 169812680 | LRRC34        | S_Shore | C4 |
| cg12397426 | chr3  | 169812646 | 169812647 | LRRC34        | Island  | C4 |
| cg27536453 | chr3  | 169812629 | 169812630 | LRRC34        | Island  | C4 |
| cg17102205 | chr2  | 207227237 | 207227238 | AC007879.4    | .       | C4 |
| cg24550644 | chr17 | 32519186  | 32519187  | RP11-466A19.6 | Island  | C4 |
| cg24550644 | chr17 | 32519186  | 32519187  | RP11-466A19.3 | Island  | C4 |
| cg09374838 | chr7  | 149881295 | 149881296 | ATP6V0E2-AS1  | .       | C4 |
| cg27195224 | chr22 | 32457160  | 32457161  | BPIFC         | .       | C4 |
| cg08196842 | chr14 | 64549799  | 64549800  | PPP1R36       | Island  | C5 |
| cg12281657 | chr14 | 64549877  | 64549878  | PPP1R36       | Island  | C5 |
| cg17930034 | chr14 | 64549884  | 64549885  | PPP1R36       | Island  | C5 |
| cg23265500 | chr14 | 64549873  | 64549874  | PPP1R36       | Island  | C5 |
| cg15841063 | chr1  | 63323829  | 63323830  | FOXD3-AS1     | Island  | C4 |
| cg08911275 | chr2  | 176092734 | 176092735 | HOXD13        | Island  | C4 |
| cg15128200 | chr1  | 107140052 | 107140053 | NTNG1         | N_Shore | C5 |
| cg13866214 | chr18 | 12304804  | 12304805  | RNU6-170P     | N_Shelf | C4 |
| cg01826863 | chr2  | 47570814  | 47570815  | KCNK12        | Island  | C5 |
| cg04981611 | chr2  | 47571338  | 47571339  | KCNK12        | Island  | C5 |
| cg13442432 | chr11 | 43579229  | 43579230  | HSD17B12      | Island  | C5 |
| cg23589617 | chr11 | 43579178  | 43579179  | HSD17B12      | Island  | C5 |
| cg07068756 | chr4  | 41256893  | 41256894  | UCHL1         | Island  | C6 |
| cg27494647 | chr7  | 150341809 | 150341810 | RARRES2       | S_Shore | C5 |
| cg01038149 | chr22 | 21014476  | 21014477  | TUBA3FP       | Island  | C5 |
| cg19789653 | chr22 | 21014348  | 21014349  | TUBA3FP       | Island  | C5 |
| cg21014483 | chr22 | 21014418  | 21014419  | TUBA3FP       | Island  | C5 |
| cg01356198 | chr3  | 188211725 | 188211726 | LPP           | .       | C4 |
| cg16754467 | chr6  | 10426355  | 10426356  | RP1-290I10.3  | Island  | C4 |
| cg10273340 | chr16 | 56190881  | 56190882  | GNAO1         | Island  | C5 |
| cg04100696 | chr11 | 12008721  | 12008722  | DKK3          | Island  | C5 |

|            |       |           |           |               |         |    |
|------------|-------|-----------|-----------|---------------|---------|----|
| cg22573528 | chr2  | 51027032  | 51027033  | AC007682.4    | N_Shore | C4 |
| cg17689707 | chr6  | 134317733 | 134317734 | SGK1          | Island  | C5 |
| cg16489586 | chr14 | 50561246  | 50561247  | MAP4K5        | S_Shore | C5 |
| cg21107197 | chr14 | 50561143  | 50561144  | MAP4K5        | S_Shore | C5 |
| cg09838956 | chr15 | 25080566  | 25080567  | SNORD116-15   | .       | C4 |
| cg03665761 | chr16 | 54932017  | 54932018  | IRX5          | Island  | C4 |
| cg16642791 | chr16 | 54932559  | 54932560  | IRX5          | Island  | C4 |
| cg00243313 | chr5  | 1883299   | 1883300   | IRX4          | Island  | C5 |
| cg00264591 | chr5  | 1883400   | 1883401   | IRX4          | Island  | C5 |
| cg07882671 | chr5  | 1882891   | 1882892   | IRX4          | Island  | C4 |
| cg24876960 | chr5  | 1883100   | 1883101   | IRX4          | Island  | C4 |
| cg08881680 | chr11 | 95232305  | 95232306  | SESN3         | Island  | C5 |
| cg07748159 | chr11 | 83286867  | 83286868  | CCDC90B       | S_Shore | C4 |
| cg01791407 | chr2  | 74002697  | 74002698  | TET3          | Island  | C4 |
| cg19527084 | chr2  | 74002648  | 74002649  | TET3          | Island  | C4 |
| cg23793040 | chr2  | 74002868  | 74002869  | TET3          | Island  | C4 |
| cg15726260 | chr6  | 30007123  | 30007124  | HCG4P3        | Island  | C5 |
| cg20941820 | chr15 | 100342129 | 100342130 | ADAMTS17      | Island  | C5 |
| cg02927327 | chr6  | 35297982  | 35297983  | DEF6          | .       | C4 |
| cg03355690 | chr6  | 35297839  | 35297840  | DEF6          | .       | C4 |
| cg05583848 | chr6  | 35297634  | 35297635  | DEF6          | .       | C4 |
| cg07294541 | chr6  | 35297778  | 35297779  | DEF6          | .       | C4 |
| cg19403104 | chr19 | 49527989  | 49527990  | RCN3          | Island  | C7 |
| cg19808978 | chr19 | 49528016  | 49528017  | RCN3          | S_Shore | C7 |
| cg17635080 | chr12 | 108636339 | 108636340 | RP11-689B22.2 | .       | C4 |
| cg24398450 | chr12 | 108635323 | 108635324 | RP11-689B22.2 | .       | C4 |
| cg04915044 | chr2  | 86036772  | 86036773  | POLR1A        | .       | C4 |
| cg26279336 | chr17 | 48597076  | 48597077  | HOXB6         | S_Shore | C4 |
| cg20184247 | chr17 | 48594690  | 48594691  | HOXB5         | S_Shore | C1 |
| cg22156128 | chr3  | 10285769  | 10285770  | GHRLOS        | .       | C1 |
| cg06500727 | chr2  | 1413392   | 1413393   | TPO           | .       | C4 |
| cg12680131 | chr2  | 1413381   | 1413382   | TPO           | .       | C4 |
| cg09374838 | chr7  | 149881295 | 149881296 | RP11-445N20.2 | .       | C4 |
| cg23817893 | chr11 | 86374890  | 86374891  | CCDC81        | Island  | C7 |
| cg27377289 | chr7  | 7772642   | 7772643   | UMAD1         | .       | C6 |
| cg18120358 | chr15 | 25062275  | 25062276  | SNORD116-5    | .       | C4 |
| cg18154158 | chr15 | 25062022  | 25062023  | SNORD116-5    | .       | C4 |
| cg24738356 | chr15 | 25062337  | 25062338  | SNORD116-5    | .       | C4 |
| cg02029242 | chr15 | 25067014  | 25067015  | SNORD116-7    | .       | C4 |
| cg01350077 | chr6  | 41638579  | 41638580  | MDFI          | Island  | C1 |
| cg27200446 | chr6  | 41638701  | 41638702  | MDFI          | Island  | C5 |
| cg05021846 | chr4  | 48483276  | 48483277  | SLC10A4       | N_Shore | C5 |
| cg19065831 | chr4  | 48483272  | 48483273  | SLC10A4       | N_Shore | C5 |
| cg19247841 | chr4  | 48483284  | 48483285  | SLC10A4       | N_Shore | C5 |
| cg05497345 | chr2  | 96325176  | 96325177  | ITPRIPL1      | Island  | C5 |
| cg08983217 | chr2  | 96325411  | 96325412  | ITPRIPL1      | Island  | C5 |



|            |       |           |           |               |         |    |
|------------|-------|-----------|-----------|---------------|---------|----|
| cg11270393 | chr2  | 96325279  | 96325280  | ITPRIPL1      | Island  | C5 |
| cg13997864 | chr2  | 96325244  | 96325245  | ITPRIPL1      | Island  | C5 |
| cg04517429 | chr4  | 154492466 | 154492467 | DCHS2         | S_Shore | C5 |
| cg06888121 | chr7  | 27129449  | 27129450  | HOXA-AS3      | N_Shore | C1 |
| cg14042889 | chr7  | 27129589  | 27129590  | HOXA-AS3      | N_Shore | C1 |
| cg01175550 | chr7  | 27107587  | 27107588  | HOXA-AS2      | N_Shore | C1 |
| cg01957751 | chr8  | 142280225 | 142280226 | TSNARE1       | Island  | C4 |
| cg00393798 | chr11 | 8594147   | 8594148   | STK33         | Island  | C5 |
| cg11596902 | chr11 | 123454126 | 123454127 | LINC01059     | .       | C4 |
| cg16823292 | chr1  | 71007055  | 71007056  | RP3-333A15.2  | .       | C4 |
| cg14638883 | chr6  | 166168713 | 166168714 | T             | Island  | C5 |
| cg17188046 | chr6  | 166168709 | 166168710 | T             | Island  | C5 |
| cg19675288 | chr6  | 166168718 | 166168719 | T             | Island  | C5 |
| cg09975039 | chr9  | 129320678 | 129320679 | C9orf106      | Island  | C4 |
| cg23363971 | chr12 | 56021487  | 56021488  | IKZF4         | .       | C4 |
| cg26607758 | chr8  | 90985325  | 90985326  | C8orf88       | Island  | C1 |
| cg04672495 | chr15 | 75844534  | 75844535  | UBE2Q2        | S_Shore | C5 |
| cg05044743 | chr17 | 47852291  | 47852292  | SP6           | S_Shore | C6 |
| cg09965384 | chr17 | 47852317  | 47852318  | SP6           | S_Shore | C4 |
| cg01597066 | chr19 | 48624249  | 48624250  | SPHK2         | Island  | C4 |
| cg02583309 | chr19 | 48624070  | 48624071  | SPHK2         | N_Shore | C4 |
| cg11376305 | chr19 | 48624253  | 48624254  | SPHK2         | Island  | C4 |
| cg22573528 | chr2  | 51027032  | 51027033  | NRXN1         | N_Shore | C4 |
| cg07983905 | chr20 | 3092915   | 3092916   | RN7SL555P     | Island  | C6 |
| cg16489547 | chr16 | 30586128  | 30586129  | RP11-146F11.5 | S_Shore | C4 |
| cg07826859 | chr7  | 44980487  | 44980488  | MYO1G         | .       | C4 |
| cg17558126 | chr1  | 206506917 | 206506918 | RASSF5        | Island  | C5 |
| cg25706502 | chr1  | 3242644   | 3242645   | PRDM16        | S_Shore | C4 |
| cg11970289 | chr12 | 122204422 | 122204423 | B3GNT4        | Island  | C5 |
| cg23445859 | chr12 | 122204240 | 122204241 | B3GNT4        | Island  | C1 |
| cg16849024 | chr19 | 41428305  | 41428306  | B3GNT8        | .       | C4 |
| cg20557104 | chr19 | 41428408  | 41428409  | B3GNT8        | .       | C4 |
| cg15242360 | chr6  | 39886754  | 39886755  | DAAM2         | .       | C4 |
| cg02000318 | chr7  | 27158094  | 27158095  | RP1-170O19.24 | N_Shore | C1 |
| cg02384857 | chr7  | 27157995  | 27157996  | RP1-170O19.24 | N_Shore | C1 |
| cg03232620 | chr7  | 27158260  | 27158261  | RP1-170O19.24 | N_Shore | C1 |
| cg06911354 | chr7  | 27157836  | 27157837  | RP1-170O19.24 | N_Shore | C1 |
| cg15372603 | chr7  | 27157620  | 27157621  | RP1-170O19.24 | S_Shore | C1 |
| cg19147218 | chr7  | 27157936  | 27157937  | RP1-170O19.24 | N_Shore | C1 |
| cg04283162 | chr15 | 29570313  | 29570314  | FAM189A1      | Island  | C5 |
| cg26552774 | chr15 | 43800200  | 43800201  | HYPK          | N_Shore | C4 |
| cg01262913 | chr21 | 37208185  | 37208186  | DSCR9         | .       | C4 |
| cg11399508 | chr21 | 37208183  | 37208184  | DSCR9         | .       | C4 |
| cg27372920 | chr5  | 53482915  | 53482916  | FST           | S_Shore | C5 |
| cg23273694 | chr7  | 151440076 | 151440077 | CRYGN         | Island  | C5 |
| cg05861291 | chr2  | 207122814 | 207122815 | KLF7-IT1      | .       | C4 |

|            |       |           |           |                |         |    |
|------------|-------|-----------|-----------|----------------|---------|----|
| cg20633478 | chr10 | 129768399 | 129768400 | RP11-109A6.3   | .       | C4 |
| cg24389730 | chr17 | 48037249  | 48037250  | COPZ2          | Island  | C5 |
| cg13050981 | chr17 | 9576648   | 9576649   | STX8           | S_Shore | C4 |
| cg23980468 | chr17 | 9576622   | 9576623   | STX8           | S_Shore | C4 |
| cg01815671 | chr3  | 126394820 | 126394821 | CCDC37         | Island  | C5 |
| cg13567541 | chr7  | 129188462 | 129188463 | SMO            | Island  | C5 |
| cg01659099 | chr15 | 40405843  | 40405844  | IVD            | .       | C4 |
| cg02378269 | chr15 | 40405390  | 40405391  | IVD            | .       | C4 |
| cg06731484 | chr15 | 40405513  | 40405514  | IVD            | .       | C4 |
| cg09655862 | chr15 | 40405433  | 40405434  | IVD            | .       | C4 |
| cg11934304 | chr15 | 40406138  | 40406139  | IVD            | .       | C4 |
| cg13463731 | chr15 | 40406166  | 40406167  | IVD            | .       | C4 |
| cg26738606 | chr15 | 40406191  | 40406192  | IVD            | .       | C4 |
| cg27148665 | chr15 | 40405581  | 40405582  | IVD            | .       | C4 |
| cg27529930 | chr15 | 40405758  | 40405759  | IVD            | .       | C4 |
| cg14539231 | chr13 | 42992126  | 42992127  | EPSTI1         | Island  | C5 |
| cg03770912 | chr17 | 48817312  | 48817313  | TLL6           | Island  | C5 |
| cg05257472 | chr17 | 48817294  | 48817295  | TLL6           | Island  | C5 |
| cg06830702 | chr17 | 48817124  | 48817125  | TLL6           | Island  | C5 |
| cg07528363 | chr17 | 48817101  | 48817102  | TLL6           | Island  | C5 |
| cg12027420 | chr17 | 48817322  | 48817323  | TLL6           | Island  | C5 |
| cg13342722 | chr17 | 48817128  | 48817129  | TLL6           | Island  | C5 |
| cg22330492 | chr17 | 48817103  | 48817104  | TLL6           | Island  | C5 |
| cg25120284 | chr17 | 48817309  | 48817310  | TLL6           | Island  | C5 |
| cg19870284 | chr1  | 175044901 | 175044902 | SDCCAG3P2      | .       | C4 |
| cg14383422 | chr2  | 200586239 | 200586240 | AOX1           | Island  | C5 |
| cg05361096 | chr12 | 49955524  | 49955525  | RP11-469H8.8   | Island  | C4 |
| cg06734406 | chr12 | 49955546  | 49955547  | RP11-469H8.8   | Island  | C4 |
| cg09577511 | chr12 | 49955390  | 49955391  | RP11-469H8.8   | Island  | C4 |
| cg02595219 | chr11 | 74467716  | 74467717  | KCNE3          | Island  | C5 |
| cg11775521 | chr11 | 74467750  | 74467751  | KCNE3          | Island  | C5 |
| cg05927190 | chr1  | 53737875  | 53737876  | GLIS1          | Island  | C5 |
| cg18949300 | chr6  | 166862290 | 166862291 | RPS6KA2        | Island  | C5 |
| cg21760146 | chr6  | 166862293 | 166862294 | RPS6KA2        | Island  | C5 |
| cg08881680 | chr11 | 95232305  | 95232306  | RP11-712B9.2   | Island  | C5 |
| cg12778476 | chr11 | 22337799  | 22337800  | CTD-2140G10.2  | N_Shelf | C5 |
| cg03656968 | chr19 | 55063057  | 55063058  | RDH13          | Island  | C4 |
| cg18372896 | chr14 | 75430673  | 75430674  | JDP2           | S_Shelf | C1 |
| cg17567560 | chr10 | 103277106 | 103277107 | INA            | Island  | C4 |
| cg24680586 | chr10 | 103276970 | 103276971 | INA            | Island  | C4 |
| cg22381196 | chr16 | 72007477  | 72007478  | ATP5A1P3       | N_Shore | C4 |
| cg04377289 | chr17 | 81018165  | 81018166  | CTD-2561B21.11 | .       | C4 |
| cg09022720 | chr1  | 92483890  | 92483891  | GFI1           | Island  | C5 |
| cg11785652 | chr1  | 92483780  | 92483781  | GFI1           | Island  | C5 |
| cg22628500 | chr1  | 92483895  | 92483896  | GFI1           | Island  | C5 |
| cg16017089 | chr11 | 73342785  | 73342786  | ARHGEF17       | Island  | C5 |

|            |       |           |           |              |         |    |
|------------|-------|-----------|-----------|--------------|---------|----|
| cg01030534 | chr7  | 143882605 | 143882606 | TCAF1        | N_Shelf | C5 |
| cg03514404 | chr7  | 143882572 | 143882573 | TCAF1        | N_Shelf | C5 |
| cg12749863 | chr21 | 25562264  | 25562265  | MIR155HG     | Island  | C5 |
| cg14315558 | chr21 | 25562370  | 25562371  | MIR155HG     | Island  | C5 |
| cg17297071 | chr21 | 25562112  | 25562113  | MIR155HG     | Island  | C5 |
| cg16818414 | chr22 | 45503086  | 45503087  | FBLN1        | Island  | C5 |
| cg10810752 | chr1  | 47225488  | 47225489  | TAL1         | Island  | C5 |
| cg15694117 | chr19 | 2717424   | 2717425   | DIRAS1       | Island  | C4 |
| cg08886727 | chr17 | 48723722  | 48723723  | HOXB13-AS1_2 | Island  | C5 |
| cg09937039 | chr14 | 75522860  | 75522861  | BATF         | .       | C4 |
| cg14424070 | chr14 | 75522477  | 75522478  | BATF         | .       | C4 |
| cg15645309 | chr14 | 75522404  | 75522405  | BATF         | .       | C4 |
| cg21531300 | chr14 | 75522457  | 75522458  | BATF         | .       | C4 |
| cg05799507 | chr16 | 56643311  | 56643312  | MT1DP        | Island  | C5 |
| cg05003322 | chr1  | 31704105  | 31704106  | COL16A1      | Island  | C4 |
| cg24577417 | chr6  | 167977879 | 167977880 | RP3-470B24.5 | N_Shore | C4 |
| cg07702750 | chr7  | 28958598  | 28958599  | TRIL         | Island  | C5 |
| cg19929126 | chr7  | 28958579  | 28958580  | TRIL         | Island  | C5 |
| cg10348922 | chr22 | 20965015  | 20965016  | AIFM3        | Island  | C4 |
| cg16590005 | chr22 | 20964957  | 20964958  | AIFM3        | Island  | C4 |
| cg24848890 | chr3  | 9915783   | 9915784   | IL17RC       | Island  | C4 |
| cg02249490 | chr17 | 43927510  | 43927511  | RP11-527L4.5 | .       | C5 |
| cg02249490 | chr17 | 43927510  | 43927511  | RP11-527L4.6 | .       | C5 |
| cg24547885 | chr2  | 179050141 | 179050142 | CCDC141      | .       | C1 |
| cg01181415 | chr12 | 16605020  | 16605021  | LMO3         | .       | C4 |
| cg01787574 | chr12 | 16605123  | 16605124  | LMO3         | .       | C4 |
| cg10143811 | chr12 | 16605051  | 16605052  | LMO3         | .       | C4 |
| cg02884176 | chr2  | 88452701  | 88452702  | FOXI3        | Island  | C5 |
| cg08871855 | chr2  | 88452767  | 88452768  | FOXI3        | Island  | C5 |
| cg19544662 | chr2  | 88452538  | 88452539  | FOXI3        | Island  | C5 |
| cg01815671 | chr3  | 126394820 | 126394821 | CCDC37-AS1   | Island  | C5 |
| cg08432727 | chr2  | 5691590   | 5691591   | LINC01248    | Island  | C5 |
| cg08526991 | chr2  | 5691262   | 5691263   | LINC01248    | Island  | C1 |
| cg26827247 | chr11 | 93330042  | 93330043  | CCDC67       | N_Shore | C5 |
| cg10037049 | chr12 | 47882850  | 47882851  | VDR          | .       | C4 |
| cg21844669 | chr12 | 119333330 | 119333331 | CCDC60       | N_Shore | C4 |
| cg16713947 | chr12 | 6451523   | 6451524   | TAPBPL       | .       | C4 |
| cg22256433 | chr17 | 8039425   | 8039426   | ALOX15B      | .       | C4 |
| cg06305609 | chr19 | 17523363  | 17523364  | FAM129C      | S_Shelf | C4 |
| cg17942851 | chr1  | 36320684  | 36320685  | SH3D21       | N_Shore | C4 |
| cg19969694 | chr15 | 40893602  | 40893603  | VPS18        | N_Shore | C1 |
| cg08307816 | chr14 | 100159855 | 100159856 | DEGS2        | Island  | C5 |
| cg07028533 | chr7  | 146116347 | 146116348 | CNTNAP2      | Island  | C5 |
| cg08432727 | chr2  | 5691590   | 5691591   | SOX11        | Island  | C5 |
| cg08526991 | chr2  | 5691262   | 5691263   | SOX11        | Island  | C1 |
| cg17246140 | chr2  | 42793124  | 42793125  | HAAO         | Island  | C5 |

|            |       |           |           |               |         |    |
|------------|-------|-----------|-----------|---------------|---------|----|
| cg16306898 | chr1  | 1540295   | 1540296   | TMEM240       | Island  | C1 |
| cg16601494 | chr1  | 1540357   | 1540358   | TMEM240       | Island  | C1 |
| cg06824394 | chr7  | 87217219  | 87217220  | TMEM243       | N_Shelf | C4 |
| cg23732024 | chr8  | 73991566  | 73991567  | LY96          | .       | C4 |
| cg02288341 | chr5  | 138274537 | 138274538 | GFRA3         | Island  | C5 |
| cg09350274 | chr5  | 138274707 | 138274708 | GFRA3         | Island  | C5 |
| cg18442524 | chr5  | 138274683 | 138274684 | GFRA3         | Island  | C5 |
| cg19670286 | chr5  | 138274438 | 138274439 | GFRA3         | Island  | C5 |
| cg21225170 | chr5  | 138274702 | 138274703 | GFRA3         | Island  | C5 |
| cg23511432 | chr5  | 138274566 | 138274567 | GFRA3         | Island  | C5 |
| cg04299389 | chr20 | 25148660  | 25148661  | RP4-738P15.1  | Island  | C5 |
| cg05446860 | chr20 | 25148490  | 25148491  | RP4-738P15.1  | Island  | C5 |
| cg05235884 | chr6  | 30164029  | 30164030  | TRIM15        | .       | C5 |
| cg23778358 | chr6  | 30163972  | 30163973  | TRIM15        | .       | C1 |
| cg11253514 | chr1  | 228416539 | 228416540 | TRIM17        | Island  | C5 |
| cg23540518 | chr1  | 228416865 | 228416866 | TRIM17        | Island  | C5 |
| cg19217130 | chr2  | 88128062  | 88128063  | FABP1         | .       | C4 |
| cg14159026 | chr6  | 105136676 | 105136677 | BVES          | Island  | C5 |
| cg08432727 | chr2  | 5691590   | 5691591   | AC108025.2    | Island  | C5 |
| cg08526991 | chr2  | 5691262   | 5691263   | AC108025.2    | Island  | C1 |
| cg10428938 | chr7  | 99393214  | 99393215  | ARPC1B        | Island  | C1 |
| cg01056889 | chr3  | 27369539  | 27369540  | NEK10         | Island  | C5 |
| cg05435286 | chr3  | 27369572  | 27369573  | NEK10         | Island  | C5 |
| cg17191919 | chr3  | 27369136  | 27369137  | NEK10         | Island  | C5 |
| cg22415969 | chr3  | 27369574  | 27369575  | NEK10         | Island  | C5 |
| cg10508349 | chr16 | 68908328  | 68908329  | TANGO6        | .       | C1 |
| cg07478122 | chr15 | 24985274  | 24985275  | PWAR5         | .       | C4 |
| cg18488946 | chr15 | 24985148  | 24985149  | PWAR5         | .       | C4 |
| cg26410550 | chr15 | 24984109  | 24984110  | PWAR5         | .       | C4 |
| cg01481989 | chr2  | 182866441 | 182866442 | FRZB          | Island  | C4 |
| cg04037038 | chr2  | 182867334 | 182867335 | FRZB          | Island  | C5 |
| cg06830784 | chr2  | 182867096 | 182867097 | FRZB          | Island  | C5 |
| cg20701689 | chr2  | 182867104 | 182867105 | FRZB          | Island  | C5 |
| cg20474425 | chr12 | 54352283  | 54352284  | RP11-753H16.3 | .       | C4 |
| cg06299833 | chr10 | 124448140 | 124448141 | RP13-238F13.3 | Island  | C4 |
| cg21401879 | chr2  | 44934897  | 44934898  | Six3os1_3     | Island  | C1 |
| cg21401879 | chr2  | 44934897  | 44934898  | Six3os1_4     | Island  | C1 |
| cg02818811 | chr12 | 75334678  | 75334679  | RP11-585P4.6  | .       | C4 |
| cg07684809 | chr12 | 75334432  | 75334433  | RP11-585P4.6  | .       | C4 |
| cg19430489 | chr12 | 75334324  | 75334325  | RP11-585P4.6  | S_Shelf | C4 |
| cg21087137 | chr12 | 75334689  | 75334690  | RP11-585P4.6  | .       | C4 |
| cg24234651 | chr12 | 75334691  | 75334692  | RP11-585P4.6  | .       | C4 |
| cg24353213 | chr1  | 89843061  | 89843062  | LRRRC8D       | N_Shore | C4 |
| cg22027897 | chr17 | 62808495  | 62808496  | RP11-453A12.1 | Island  | C5 |
| cg12296552 | chr3  | 11017157  | 11017158  | SLC6A1        | Island  | C4 |
| cg21611775 | chr3  | 11017150  | 11017151  | SLC6A1        | Island  | C4 |

|            |       |           |           |               |        |         |    |
|------------|-------|-----------|-----------|---------------|--------|---------|----|
| cg05184938 | chr17 | 77373857  | 77373858  |               | Sep-09 | Island  | C4 |
| cg06848185 | chr17 | 77372820  | 77372821  |               | Sep-09 | Island  | C4 |
| cg12783819 | chr17 | 77373575  | 77373576  |               | Sep-09 | Island  | C4 |
| cg19554255 | chr17 | 77372969  | 77372970  |               | Sep-09 | Island  | C4 |
| cg20275528 | chr17 | 77373402  | 77373403  |               | Sep-09 | Island  | C4 |
| cg20955894 | chr17 | 77451573  | 77451574  |               | Sep-09 | Island  | C4 |
| cg21292033 | chr17 | 77466107  | 77466108  |               | Sep-09 | .       | C1 |
| cg00174845 | chr18 | 78796804  | 78796805  | RP11-715C4.1  |        | Island  | C4 |
| cg16576694 | chr14 | 105605478 | 105605479 | RP11-731F5.1  |        | .       | C4 |
| cg24398450 | chr12 | 108635323 | 108635324 | SELPLG        |        | .       | C4 |
| cg18261462 | chr17 | 48430343  | 48430344  | SKAP1         |        | S_Shore | C5 |
| cg19585103 | chr17 | 48430187  | 48430188  | SKAP1         |        | Island  | C5 |
| cg02083559 | chr12 | 23950424  | 23950425  | SOX5          |        | .       | C5 |
| cg26067203 | chr1  | 2003850   | 2003851   | CFAP74        |        | .       | C5 |
| cg13296579 | chr11 | 133065067 | 133065068 | AP004782.1    |        | .       | C4 |
| cg20417723 | chr11 | 133065225 | 133065226 | AP004782.1    |        | .       | C4 |
| cg15571373 | chr15 | 25072199  | 25072200  | SNORD116-9    |        | .       | C4 |
| cg25114752 | chr15 | 25070236  | 25070237  | SNORD116-8    |        | .       | C4 |
| cg16601489 | chr15 | 25059327  | 25059328  | SNORD116-4    |        | .       | C4 |
| cg02534163 | chr8  | 119638754 | 119638755 | ENPP2         |        | .       | C5 |
| cg06998282 | chr8  | 119639158 | 119639159 | ENPP2         |        | .       | C5 |
| cg15841063 | chr1  | 63323829  | 63323830  | FOXD3         |        | Island  | C4 |
| cg07201835 | chr12 | 32678435  | 32678436  | DNM1L         |        | N_Shore | C4 |
| cg20829550 | chr12 | 92735671  | 92735672  | PLEKHG7       |        | .       | C4 |
| cg04900427 | chr1  | 43147896  | 43147897  | FAM183A       |        | Island  | C4 |
| cg05125578 | chr1  | 43147894  | 43147895  | FAM183A       |        | Island  | C4 |
| cg15961211 | chr1  | 43147769  | 43147770  | FAM183A       |        | Island  | C4 |
| cg15997906 | chr1  | 43147762  | 43147763  | FAM183A       |        | Island  | C4 |
| cg22608128 | chr1  | 43147823  | 43147824  | FAM183A       |        | Island  | C4 |
| cg16522557 | chr13 | 110506764 | 110506765 | COL4A2        |        | .       | C4 |
| cg23027583 | chr1  | 220879216 | 220879217 | HLX           |        | Island  | C5 |
| cg10054857 | chr18 | 64149309  | 64149310  | LINC00305     |        | .       | C4 |
| cg14280533 | chr14 | 73239819  | 73239820  | PAPLN         |        | Island  | C4 |
| cg22638491 | chr14 | 73239968  | 73239969  | PAPLN         |        | Island  | C4 |
| cg23425316 | chr14 | 73239741  | 73239742  | PAPLN         |        | Island  | C4 |
| cg05862007 | chr2  | 48723014  | 48723015  | LHCGR         |        | .       | C4 |
| cg01431908 | chr1  | 46203210  | 46203211  | LURAP1        |        | Island  | C4 |
| cg06787764 | chr1  | 46203198  | 46203199  | LURAP1        |        | Island  | C4 |
| cg08160980 | chr1  | 46203168  | 46203169  | LURAP1        |        | Island  | C4 |
| cg15696662 | chr1  | 46203549  | 46203550  | LURAP1        |        | Island  | C4 |
| cg23431851 | chr1  | 46203150  | 46203151  | LURAP1        |        | Island  | C4 |
| cg14145801 | chr2  | 186848984 | 186848985 | ZSWIM2        |        | N_Shore | C5 |
| cg22289434 | chr20 | 35601018  | 35601019  | FER1L4        |        | Island  | C1 |
| cg13702222 | chr3  | 152299451 | 152299452 | MBNL1         |        | .       | C4 |
| cg16802592 | chr15 | 36887402  | 36887403  | RP11-122D10.1 |        | Island  | C5 |
| cg20034372 | chr15 | 36887409  | 36887410  | RP11-122D10.1 |        | Island  | C5 |

|            |       |           |           |                |         |    |
|------------|-------|-----------|-----------|----------------|---------|----|
| cg17504394 | chr17 | 72343154  | 72343155  | RP11-1124B17.1 | .       | C1 |
| cg03004714 | chr18 | 61893132  | 61893133  | RNF152         | N_Shore | C5 |
| cg11870261 | chr3  | 36945188  | 36945189  | TRANK1         | Island  | C5 |
| cg07706558 | chr11 | 12161899  | 12161900  | MICAL2         | .       | C1 |
| cg23584743 | chr4  | 13544533  | 13544534  | NKX3-2         | Island  | C5 |
| cg27438798 | chr4  | 13544527  | 13544528  | NKX3-2         | Island  | C5 |
| cg01029638 | chr7  | 120988820 | 120988821 | CPED1          | .       | C5 |
| cg21746532 | chr15 | 24953646  | 24953647  | SNRPN          | N_Shore | C4 |
| cg02399524 | chr11 | 63491037  | 63491038  | HRASLS5        | Island  | C5 |
| cg07213036 | chr13 | 27968590  | 27968591  | CDX2           | Island  | C4 |
| cg16201038 | chr13 | 27970623  | 27970624  | CDX2           | Island  | C7 |
| cg00813746 | chr3  | 50238126  | 50238127  | GNAI2          | Island  | C4 |
| cg05060704 | chr3  | 50238262  | 50238263  | GNAI2          | S_Shore | C4 |
| cg06508783 | chr3  | 50238014  | 50238015  | GNAI2          | Island  | C4 |
| cg12691534 | chr3  | 50237962  | 50237963  | GNAI2          | Island  | C4 |
| cg12996903 | chr3  | 50238143  | 50238144  | GNAI2          | Island  | C4 |
| cg20918957 | chr3  | 50237680  | 50237681  | GNAI2          | N_Shore | C4 |
| cg01926269 | chr2  | 25168801  | 25168802  | POMC           | Island  | C5 |
| cg24425171 | chr2  | 25168842  | 25168843  | POMC           | Island  | C5 |
| cg00731944 | chr17 | 6080773   | 6080774   | WSCD1          | .       | C4 |
| cg27201457 | chr17 | 6080971   | 6080972   | WSCD1          | .       | C4 |
| cg05766064 | chr18 | 21682615  | 21682616  | MIR320C1       | .       | C4 |
| cg11314310 | chr10 | 1074891   | 1074892   | WDR37          | .       | C4 |
| cg27201679 | chr10 | 1074854   | 1074855   | WDR37          | .       | C4 |
| cg10282491 | chr16 | 3012367   | 3012368   | CLDN9          | N_Shore | C4 |
| cg06080729 | chr16 | 3017625   | 3017626   | CLDN6          | Island  | C4 |
| cg09275980 | chr15 | 25105778  | 25105779  | SNORD116-29    | .       | C4 |
| cg10109500 | chr3  | 172448094 | 172448095 | GHSR           | Island  | C7 |
| cg19785066 | chr20 | 46118016  | 46118017  | CD40           | N_Shore | C7 |
| cg17202086 | chr11 | 77411794  | 77411795  | PAK1           | Island  | C4 |
| cg18309286 | chr11 | 77412002  | 77412003  | PAK1           | Island  | C4 |
| cg26996201 | chr11 | 77411819  | 77411820  | PAK1           | Island  | C4 |
| cg10273340 | chr16 | 56190881  | 56190882  | RP11-46107.1   | Island  | C5 |
| cg18722881 | chr11 | 22666593  | 22666594  | GAS2           | N_Shore | C5 |
| cg01047631 | chr16 | 54938661  | 54938662  | CTD-3032H12.1  | Island  | C4 |
| cg06892501 | chr11 | 5323875   | 5323876   | OR51B2         | .       | C4 |
| cg23039189 | chr11 | 7512797   | 7512798   | CTD-2516F10.2  | N_Shore | C4 |
| cg02748089 | chr16 | 78506275  | 78506276  | RP11-264L1.4   | .       | C4 |
| cg05368724 | chr2  | 96895932  | 96895933  | FAM178B        | .       | C7 |
| cg00836482 | chr3  | 119810109 | 119810110 | NR1I2          | Island  | C3 |
| cg21041775 | chr12 | 54031634  | 54031635  | HOXC5          | S_Shore | C7 |
| cg00506343 | chr12 | 54027249  | 54027250  | HOXC6          | N_Shelf | C1 |
| cg05412137 | chr12 | 53990960  | 53990961  | HOXC6          | N_Shelf | C4 |
| cg11930554 | chr4  | 73944195  | 73944196  | CXCL1P         | Island  | C5 |
| cg24591969 | chr1  | 6045799   | 6045800   | KCNAB2         | .       | C4 |
| cg01366985 | chr6  | 25167467  | 25167468  | CMAHP          | .       | C4 |

|            |       |           |           |               |         |    |
|------------|-------|-----------|-----------|---------------|---------|----|
| cg01627847 | chr17 | 45262145  | 45262146  | MAP3K14-AS1   | Island  | C4 |
| cg03048083 | chr17 | 45262130  | 45262131  | MAP3K14-AS1   | Island  | C4 |
| cg04992638 | chr17 | 45261961  | 45261962  | MAP3K14-AS1   | Island  | C4 |
| cg08124910 | chr17 | 45262148  | 45262149  | MAP3K14-AS1   | Island  | C4 |
| cg08247376 | chr17 | 45261991  | 45261992  | MAP3K14-AS1   | Island  | C4 |
| cg11933779 | chr17 | 45261673  | 45261674  | MAP3K14-AS1   | N_Shore | C4 |
| cg13001868 | chr17 | 45261856  | 45261857  | MAP3K14-AS1   | Island  | C4 |
| cg17222164 | chr17 | 45262109  | 45262110  | MAP3K14-AS1   | Island  | C4 |
| cg19539667 | chr17 | 45262464  | 45262465  | MAP3K14-AS1   | Island  | C4 |
| cg24542751 | chr17 | 45262222  | 45262223  | MAP3K14-AS1   | Island  | C4 |
| cg26532627 | chr17 | 45262377  | 45262378  | MAP3K14-AS1   | Island  | C4 |
| cg26742995 | chr17 | 45262227  | 45262228  | MAP3K14-AS1   | Island  | C4 |
| cg27380724 | chr19 | 55304731  | 55304732  | BRSK1         | Island  | C4 |
| cg16212145 | chr14 | 24634524  | 24634525  | GZMB          | .       | C4 |
| cg09636214 | chr14 | 73245783  | 73245784  | RP4-647C14.2  | Island  | C6 |
| cg14183329 | chr7  | 131558203 | 131558204 | PODXL         | Island  | C5 |
| cg07371589 | chr1  | 151131891 | 151131892 | RP11-68I18.10 | Island  | C5 |
| cg16399136 | chr1  | 151131527 | 151131528 | RP11-68I18.10 | Island  | C5 |
| cg17161421 | chr6  | 32152300  | 32152301  | PRRT1         | S_Shore | C1 |
| cg21037008 | chr6  | 32152162  | 32152163  | PRRT1         | S_Shore | C1 |
| cg11391462 | chr1  | 103570439 | 103570440 | AMY2B         | .       | C4 |
| cg08863777 | chr11 | 94545291  | 94545292  | PIWIL4        | Island  | C4 |
| cg13300301 | chr11 | 94545902  | 94545903  | PIWIL4        | S_Shore | C4 |
| cg18023065 | chr11 | 94545437  | 94545438  | PIWIL4        | Island  | C4 |
| cg05250768 | chr7  | 27169651  | 27169652  | MIR196B       | Island  | C4 |
| cg08964780 | chr7  | 27169844  | 27169845  | MIR196B       | Island  | C4 |
| cg24884519 | chr7  | 27170171  | 27170172  | MIR196B       | S_Shore | C4 |
| cg25644556 | chr7  | 27169963  | 27169964  | MIR196B       | Island  | C4 |
| cg26259537 | chr7  | 27169628  | 27169629  | MIR196B       | Island  | C4 |
| cg11948456 | chr2  | 178413605 | 178413606 | AC009948.5    | Island  | C5 |
| cg21693907 | chr1  | 203625933 | 203625934 | ATP2B4        | N_Shelf | C4 |
| cg10020934 | chr17 | 66877476  | 66877477  | CACNG5        | .       | C4 |
| cg02818811 | chr12 | 75334678  | 75334679  | GLIPR1L1      | .       | C4 |
| cg07684809 | chr12 | 75334432  | 75334433  | GLIPR1L1      | .       | C4 |
| cg19430489 | chr12 | 75334324  | 75334325  | GLIPR1L1      | S_Shelf | C4 |
| cg21087137 | chr12 | 75334689  | 75334690  | GLIPR1L1      | .       | C4 |
| cg24234651 | chr12 | 75334691  | 75334692  | GLIPR1L1      | .       | C4 |
| cg10296301 | chr6  | 163193482 | 163193483 | RP1-301L19.1  | .       | C4 |
| cg01733284 | chr1  | 158421329 | 158421330 | OR10K2        | .       | C7 |
| cg05250768 | chr7  | 27169651  | 27169652  | HOXA10-AS     | Island  | C4 |
| cg08964780 | chr7  | 27169844  | 27169845  | HOXA10-AS     | Island  | C4 |
| cg26259537 | chr7  | 27169628  | 27169629  | HOXA10-AS     | Island  | C4 |
| cg03905819 | chr12 | 53991491  | 53991492  | MIR196A2      | N_Shelf | C4 |
| cg05412137 | chr12 | 53990960  | 53990961  | MIR196A2      | N_Shelf | C4 |
| cg27494647 | chr7  | 150341809 | 150341810 | RP4-584D14.7  | S_Shore | C5 |
| cg01698298 | chr11 | 61295492  | 61295493  | VWCE          | Island  | C5 |

|            |       |           |           |               |         |    |
|------------|-------|-----------|-----------|---------------|---------|----|
| cg12110327 | chr10 | 37975653  | 37975654  | RP11-393J16.4 | N_Shore | C4 |
| cg17695512 | chr11 | 55967983  | 55967984  | OR10AG1       | .       | C4 |
| cg03781098 | chr12 | 7695752   | 7695753   | GDF3          | .       | C4 |
| cg18552861 | chr2  | 20666085  | 20666086  | GDF7          | Island  | C5 |
| cg10037049 | chr12 | 47882850  | 47882851  | RP11-89H19.1  | .       | C4 |
| cg23044884 | chr8  | 30387629  | 30387630  | RBPM5         | S_Shelf | C7 |
| cg13050981 | chr17 | 9576648   | 9576649   | CFAP52        | S_Shore | C4 |
| cg23980468 | chr17 | 9576622   | 9576623   | CFAP52        | S_Shore | C4 |
| cg14798020 | chr15 | 25075020  | 25075021  | SNORD116-11   | .       | C4 |
| cg21844656 | chr15 | 25078648  | 25078649  | SNORD116-13   | .       | C4 |
| cg01620672 | chr15 | 25076981  | 25076982  | SNORD116-12   | .       | C4 |
| cg21844656 | chr15 | 25078648  | 25078649  | SNORD116-14   | .       | C4 |
| cg03942855 | chr1  | 109668303 | 109668304 | GSTM2         | Island  | C5 |
| cg07234865 | chr1  | 156420428 | 156420429 | C1orf61       | N_Shore | C5 |
| cg14862722 | chr3  | 2866595   | 2866596   | CNTN4         | .       | C4 |
| cg14328457 | chr17 | 39225222  | 39225223  | STAC2         | Island  | C6 |
| cg15742848 | chr2  | 168912991 | 168912992 | SPC25         | .       | C5 |
| cg07234865 | chr1  | 156420428 | 156420429 | MIR9-1        | N_Shore | C5 |
| cg05335944 | chr10 | 13707010  | 13707011  | FRMD4A        | .       | C1 |
| cg16674492 | chr3  | 128492843 | 128492844 | GATA2         | Island  | C1 |
| cg01916115 | chr6  | 128883194 | 128883195 | LAMA2         | .       | C5 |
| cg19966212 | chr5  | 150413220 | 150413221 | CD74          | .       | C4 |
| cg24874612 | chr17 | 4786470   | 4786471   | RP11-81A22.4  | S_Shore | C4 |
| cg15377585 | chr7  | 19773456  | 19773457  | TMEM196       | .       | C5 |
| cg05951609 | chr4  | 76435354  | 76435355  | SHROOM3       | .       | C4 |
| cg13050390 | chr7  | 143958558 | 143958559 | RP4-669B10.3  | .       | C7 |
| cg10454568 | chr14 | 96424295  | 96424296  | PEBP1P1       | Island  | C4 |
| cg07068756 | chr4  | 41256893  | 41256894  | UCHL1-AS1     | Island  | C6 |
| cg11168687 | chr4  | 184805628 | 184805629 | ACSL1         | S_Shelf | C4 |
| cg07800892 | chr19 | 37211233  | 37211234  | ZNF585B       | .       | C2 |
| cg01950845 | chr15 | 93089501  | 93089502  | RGMA          | Island  | C5 |
| cg02918577 | chr15 | 93089916  | 93089917  | RGMA          | Island  | C6 |
| cg10959198 | chr15 | 93089667  | 93089668  | RGMA          | Island  | C5 |
| cg12595281 | chr15 | 93089943  | 93089944  | RGMA          | Island  | C5 |
| cg09168604 | chr10 | 86367431  | 86367432  | GRID1         | Island  | C5 |
| cg11832404 | chr12 | 64824478  | 64824479  | TBC1D30       | Island  | C4 |
| cg23684878 | chr12 | 64824480  | 64824481  | TBC1D30       | Island  | C4 |
| cg14080475 | chr9  | 114388215 | 114388216 | AKNA          | .       | C4 |
| cg04822330 | chr6  | 125748026 | 125748027 | HEY2          | Island  | C5 |
| cg00679711 | chr17 | 3813199   | 3813200   | C17orf85      | .       | C4 |
| cg02317397 | chr17 | 3812985   | 3812986   | C17orf85      | .       | C4 |
| cg25382652 | chr17 | 3813132   | 3813133   | C17orf85      | .       | C4 |
| cg06148736 | chr22 | 18998178  | 18998179  | AC007326.9    | Island  | C4 |
| cg09619624 | chr22 | 18998119  | 18998120  | AC007326.9    | Island  | C4 |
| cg18098433 | chr11 | 115192204 | 115192205 | CADM1         | .       | C4 |
| cg21913319 | chr1  | 86156945  | 86156946  | COL24A1       | Island  | C5 |



|            |       |           |           |                |         |    |
|------------|-------|-----------|-----------|----------------|---------|----|
| cg26121931 | chr6  | 29927427  | 29927428  | HCG4B          | S_Shore | C5 |
| cg10334121 | chr3  | 138010153 | 138010154 | CLDN18         | Island  | C1 |
| cg10510478 | chr3  | 138009968 | 138009969 | CLDN18         | N_Shore | C1 |
| cg23008404 | chr3  | 138010155 | 138010156 | CLDN18         | Island  | C1 |
| cg20950465 | chr1  | 52602509  | 52602510  | GPX7           | Island  | C5 |
| cg13939204 | chr9  | 127904778 | 127904779 | ST6GALNAC6     | .       | C1 |
| cg22773661 | chr4  | 48490208  | 48490209  | ZAR1           | Island  | C5 |
| cg05855588 | chr13 | 33016135  | 33016136  | KL             | Island  | C5 |
| cg21545902 | chr13 | 33015945  | 33015946  | KL             | Island  | C5 |
| cg03811891 | chr6  | 158516254 | 158516255 | CACYBPP3       | Island  | C4 |
| cg06214007 | chr1  | 89363749  | 89363750  | GBP6           | .       | C4 |
| cg26866325 | chr4  | 74054842  | 74054843  | PPBPP2         | .       | C4 |
| cg07748159 | chr11 | 83286867  | 83286868  | RP11-727A23.10 | S_Shore | C4 |
| cg04525496 | chr5  | 83471707  | 83471708  | VCAN           | N_Shore | C5 |
| cg19540689 | chr5  | 83471478  | 83471479  | VCAN           | N_Shore | C5 |
| cg21810188 | chr5  | 83471631  | 83471632  | VCAN           | N_Shore | C5 |
| cg13883696 | chr1  | 61054216  | 61054217  | NFIA           | Island  | C5 |

---
