# Supplementary material for: Mining the Prognostic Role of DNA Methylation Heterogeneity in Lung Adenocarcinoma
Source: Hindawi journal article supplement (doi:10.1155/2022/9389372), 2022-05-28
Supplement: f9 [file 9389372.f9.pdf]

**Table S3**

| GO.ID      | Description                                        | p.Val    | FDR      | Phenotype |
|------------|----------------------------------------------------|----------|----------|-----------|
| GO:0032501 | multicellular organismal process                   | 3.07E-02 | 3.07E-02 | 1         |
| GO:0048856 | anatomical structure development                   | 2.65E-02 | 2.65E-02 | 1         |
| GO:0009653 | anatomical structure morphogenesis                 | 3.48E-04 | 3.48E-04 | 1         |
| GO:0007275 | multicellular organism development                 | 1.40E-03 | 1.40E-03 | 1         |
| GO:0007389 | pattern specification process                      | 6.60E-04 | 6.60E-04 | 1         |
| GO:0009790 | embryo development                                 | 2.01E-04 | 2.01E-04 | 1         |
| GO:0009792 | embryo development ending in birth or egg hatching | 4.91E-02 | 4.91E-02 | 1         |
| GO:0043009 | chordate embryonic development                     | 4.14E-02 | 4.14E-02 | 1         |
| GO:0048598 | embryonic morphogenesis                            | 6.19E-04 | 6.19E-04 | 1         |
| GO:0048731 | system development                                 | 1.47E-03 | 1.47E-03 | 1         |
| GO:0055123 | digestive system development                       | 8.31E-03 | 8.31E-03 | 1         |
| GO:0001501 | skeletal system development                        | 1.04E-02 | 1.04E-02 | 1         |
| GO:0048706 | embryonic skeletal system development              | 1.81E-03 | 1.81E-03 | 1         |
| GO:0061458 | reproductive system development                    | 1.73E-02 | 1.73E-02 | 1         |
| GO:0035295 | tube development                                   | 3.52E-04 | 3.52E-04 | 1         |
| GO:0035239 | tube morphogenesis                                 | 4.80E-03 | 4.80E-03 | 1         |
| GO:0048565 | digestive tract development                        | 3.28E-03 | 3.28E-03 | 1         |
| GO:0048513 | animal organ development                           | 1.49E-03 | 1.49E-03 | 1         |
| GO:0048568 | embryonic organ development                        | 9.60E-04 | 9.60E-04 | 1         |
| GO:0048608 | reproductive structure development                 | 1.50E-02 | 1.50E-02 | 1         |
| GO:0051239 | regulation of multicellular organismal process     | 5.35E-03 | 5.35E-03 | 1         |
| GO:0050793 | regulation of developmental process                | 3.53E-02 | 3.53E-02 | 1         |
| GO:0030154 | cell differentiation                               | 3.18E-02 | 3.18E-02 | 1         |
| GO:0045165 | cell fate commitment                               | 4.13E-02 | 4.13E-02 | 1         |
| GO:0045596 | negative regulation of cell differentiation        | 2.22E-02 | 2.22E-02 | 1         |
| GO:0048518 | positive regulation of biological process          | 1.07E-03 | 1.07E-03 | 1         |
| GO:0048522 | positive regulation of cellular process            | 2.56E-02 | 2.56E-02 | 1         |
| GO:0009952 | anterior/posterior pattern specification           | 1.26E-02 | 1.26E-02 | 1         |

|             |                                                                                |          |          |   |
|-------------|--------------------------------------------------------------------------------|----------|----------|---|
| GO:0043565  | sequence-specific DNA binding                                                  | 4.30E-03 | 4.30E-03 | 1 |
| GO:0000981  | RNA polymerase II transcription factor activity, sequence-specific DNA binding | 2.85E-02 | 2.85E-02 | 1 |
| KEGG:04514  | Cell adhesion molecules (CAMs)                                                 | 1.21E-03 | 1.21E-03 | 1 |
| TF:M00649   | Factor: MAZ; motif: GGGGAGGG                                                   | 2.93E-02 | 2.93E-02 | 1 |
| TF:M01587   | Factor: FPM315; motif: SRGGGAGGAGGN                                            | 2.44E-02 | 2.44E-02 | 1 |
| TF:M07040_1 | Factor: GKLF; motif: NNRRGRRNGNSNNN; match class: 1                            | 3.96E-04 | 3.96E-04 | 1 |

---
